# Supplementary material for: Proteomic profiling of the thrombin-activated canine platelet secretome (CAPS)
Source: PLoS One. 2019 Nov 13;14(11):e0224891. doi: 10.1371/journal.pone.0224891 (PMC6853320; doi:10.1371/journal.pone.0224891)
Supplement: S1 Table — The listed 1,918 proteins are sorted A-Z. 1 peptide ID (marked in red): n = 573 (29.9%). 'ID only' designates proteins present in trace amounts, a blank space means the protein was not detected. (XLSX) [file pone.0224891.s004.xlsx]

## Sheet: Table S1_Mother table (R1)
Table S1. Mother table for all proteins identified (n = 1918).
The listed proteins are sorted A-Z. 1 peptide ID (marked in red): n = 573 (29.9%). 'ID only' designates proteins present in trace amounts, a blank space means the protein was not detected.
RefSeq accession	Gene Symbol	Description	Coverage [%]	Max. # Peptides	Max. # Unique Peptides	MW [kDa]	calc. pI	D1 sol. fraction sample	D1 sol. fraction control	D1 sol. fraction ratio	D1 pel. fraction sample	D1 pel. fraction control	D1 pel. fraction ratio	D2 sol. fraction sample	D2 sol. fraction control	D2 sol. fraction ratio	D2 pel. fraction sample	D2 pel. fraction control	D2 pel. fraction ratio	D3 sol. fraction sample	D3 sol. fraction control	D3 sol. fraction ratio	D3 pel. fraction sample	D3 pel. fraction control	D3 pel. fraction ratio	In number of dogs	CAPS protein	In Burkhart et al. 2012	In Parsons et al. 2018 core	In Martín-Granado et al. 2017 top 100
XP_022278409	UBE2O	(E3-independent) E2 ubiquitin-conjugating enzyme [Canis lupus familiaris]	2	7	7	128.2	5.12	843000	557000	1.5	88600	22500	3.9	2090000	1100000	1.9	349000	132000	2.6	2460000	1420000	1.7	314000	158000	2	3	Y	Y	N	N
XP_853283	PLCB3	1-phosphatidylinositol 4,5-bisphosphate phosphodiesterase beta-3 [Canis lupus familiaris]	4	9	9	138.7	6.11	56300	12800	4.4	-	-	0	ID only	ID only	1	-	-	0	3610000	2220000	1.6	178000	91500	1.9	3	N	Y	N	N
XP_022279616	PLCD3	1-phosphatidylinositol 4,5-bisphosphate phosphodiesterase delta-3 [Canis lupus familiaris]	2	1	1	86.9	7.56	-	-	0	-	-	0	39700000	25200000	1.6	-	-	0	-	-	0	-	-	0	1	N	N	N	N
XP_022274836	PLCG2	1-phosphatidylinositol 4,5-bisphosphate phosphodiesterase gamma-2 [Canis lupus familiaris]	24	20	20	147.8	6.73	-	-	0	359000	112000	3.2	-	-	0	3440000	1280000	2.7	ID only	ID only	1	13200000	5440000	2.4	3	Y	Y	N	N
XP_535555	GBE1; LOC478380	1,4-alpha-glucan-branching enzyme [Canis lupus familiaris]	2	10	10	80.6	6.28	954000	829000	1.2	-	-	0	3640000	1670000	2.2	-	-	0	16600000	10400000	1.6	279000	153000	1.8	3	N	Y	N	N
XP_005617237	AKR1E2	1,5-anhydro-D-fructose reductase [Canis lupus familiaris]	33	7	6	34	7.49	2660000	870000	3.1	-	-	0	6250000	3960000	1.6	-	-	0	8760000	3750000	2.3	-	-	0	3	Y	Y	N	N
XP_005625137	PHPT1	14 kDa phosphohistidine phosphatase isoform X2 [Canis lupus familiaris]	39	5	5	14	5.5	2170000	979000	2.2	-	-	0	1270000	895000	1.4	-	-	0	3000000	1180000	2.5	-	-	0	3	Y	Y	N	N
XP_852754	YWHAB	14-3-3 protein beta/alpha [Canis lupus familiaris]	52	19	15	27.8	4.83	13600000	8790000	1.5	319000	305000	1	101000000	69400000	1.5	3820000	1380000	2.8	147000000	111000000	1.3	5720000	4040000	1.4	3	N	Y	Y	N
XP_854358	YWHAE	14-3-3 protein epsilon isoform X2 [Canis lupus familiaris]	58	21	20	29.2	4.74	58500000	25500000	2.3	3030000	797000	3.8	90300000	59300000	1.5	3270000	790000	4.1	125000000	79700000	1.6	6780000	2900000	2.3	3	Y	Y	Y	N
XP_003433473	YWHAH	14-3-3 protein eta [Canis lupus familiaris]	52	19	16	28.2	4.89	24400000	11700000	2.1	108000	187000	0.6	126000000	84700000	1.5	5730000	2200000	2.6	161000000	88100000	1.8	7540000	3950000	1.9	3	N	Y	Y	Y
XP_022275295	YWHAG	14-3-3 protein gamma [Canis lupus familiaris]	27	9	7	26.5	4.87	2800000	4370000	0.6	ID only	ID only	1	6670000	3750000	1.8	-	-	0	10900000	4960000	2.2	ID only	ID only	1	3	N	Y	Y	N
XP_532871	YWHAQ	14-3-3 protein theta [Canis lupus familiaris]	23	16	14	27.7	4.78	6320000	5020000	1.3	ID only	ID only	1	16100000	10300000	1.6	165000	84600	2	22300000	14000000	1.6	265000	136000	1.9	3	N	Y	N	N
XP_013974025	YWHAZ	14-3-3 protein zeta/delta [Canis lupus familiaris]	71	29	25	27.7	4.79	224000000	98800000	2.3	2360000	1470000	1.6	684000000	483000000	1.4	25000000	8180000	3.1	1180000000	623000000	1.9	51700000	27200000	1.9	3	N	Y	Y	Y
XP_013969609	HSD17B14	17-beta-hydroxysteroid dehydrogenase 14 isoform X1 [Canis lupus familiaris]	7	1	1	28.3	6.55	-	-	0	-	-	0	-	-	0	-	-	0	439000	350000	1.3	-	-	0	1	N	N	N	N
XP_005629676	LOC610687; ADO	2-aminoethanethiol dioxygenase [Canis lupus familiaris]	7	1	1	29.6	5.49	ID only	ID only	1	-	-	0	-	-	0	-	-	0	-	-	0	-	-	0	1	N	Y	N	N
XP_532278	HRSP12; RIDA	2-iminobutanoate/2-iminopropanoate deaminase isoform X1 [Canis lupus familiaris]	39	3	3	14.3	8.1	1590000	202000	7.8	-	-	0	1920000	665000	2.9	-	-	0	3460000	2270000	1.5	-	-	0	3	Y	N	N	N
XP_005624533	CNP	2',3'-cyclic-nucleotide 3'-phosphodiesterase isoform X1 [Canis lupus familiaris]	6	1	1	49.7	9.01	-	-	0	-	-	0	-	-	0	ID only	ID only	1	-	-	0	ID only	ID only	1	2	N	Y	N	N
XP_005635901	PSMD1	26S proteasome non-ATPase regulatory subunit 1 [Canis lupus familiaris]	13	6	6	105.8	5.35	-	-	0	368000	80400	4.6	-	-	0	1540000	749000	2.1	279000	296000	0.9	2500000	1510000	1.7	3	Y	Y	N	N
XP_538135	PSMD10	26S proteasome non-ATPase regulatory subunit 10 isoform X1 [Canis lupus familiaris]	21	2	2	24.5	6.1	260000	69000	3.8	-	-	0	462000	179000	2.6	-	-	0	1480000	832000	1.8	-	-	0	3	Y	Y	N	N
XP_537730	PSMD11	26S proteasome non-ATPase regulatory subunit 11 [Canis lupus familiaris]	19	7	7	47.4	6.48	-	-	0	150000	112000	1.3	246000	111000	2.2	1540000	900000	1.7	653000	666000	1	1940000	932000	2.1	3	N	Y	N	N
XP_537584	PSMD12	26S proteasome non-ATPase regulatory subunit 12 isoform X1 [Canis lupus familiaris]	5	4	4	52.9	7.06	-	-	0	34000	31600	1.1	-	-	0	630000	341000	1.8	ID only	ID only	1	524000	306000	1.7	3	N	Y	N	N
XP_848457	PSMD13	26S proteasome non-ATPase regulatory subunit 13 [Canis lupus familiaris]	15	4	4	42.9	5.81	-	-	0	-	-	0	-	-	0	472000	217000	2.2	-	-	0	1230000	544000	2.3	2	Y	Y	N	N
XP_022270365	PSMD14	26S proteasome non-ATPase regulatory subunit 14 [Canis lupus familiaris]	23	4	4	38	6.35	-	-	0	-	-	0	178000	107000	1.7	1300000	545000	2.4	792000	718000	1.1	1940000	964000	2	2	Y	Y	N	N
XP_535824	PSMD2	26S proteasome non-ATPase regulatory subunit 2 [Canis lupus familiaris]	8	4	4	100.2	5.2	-	-	0	68700	11300	6.1	163000	178000	0.9	934000	526000	1.8	245000	310000	0.8	1100000	814000	1.3	3	N	Y	N	N
XP_548138	PSMD3	26S proteasome non-ATPase regulatory subunit 3 [Canis lupus familiaris]	16	5	5	60.9	8.44	-	-	0	73800	4320	17.1	-	-	0	585000	272000	2.2	ID only	130000	0.5	844000	430000	2	3	Y	Y	N	N
XP_022260016	PSMD4	26S proteasome non-ATPase regulatory subunit 4 isoform X1 [Canis lupus familiaris]	10	2	2	41.9	4.94	-	-	0	-	-	0	-	-	0	ID only	ID only	1	-	-	0	333000	166000	2	2	N	Y	N	N
XP_005627062	PSMD5	26S proteasome non-ATPase regulatory subunit 5, partial [Canis lupus familiaris]	2	12	12	55.8	5.34	1650000	99400	16.6	14000	16800	0.8	2560000	296000	8.6	-	-	0	7180000	2180000	3.3	185000	77300	2.4	3	Y	Y	N	N
XP_541816	PSMD6	26S proteasome non-ATPase regulatory subunit 6 isoform X1 [Canis lupus familiaris]	8	2	2	45.6	5.53	-	-	0	ID only	ID only	1	-	-	0	132000	74700	1.8	-	-	0	269000	113000	2.4	3	N	Y	N	N
XP_536802	PSMD7	26S proteasome non-ATPase regulatory subunit 7 [Canis lupus familiaris]	4	2	2	37	6.77	-	-	0	-	-	0	-	-	0	661000	262000	2.5	-	-	0	388000	229000	1.7	2	N	Y	N	N
XP_534665	PSMD9	26S proteasome non-ATPase regulatory subunit 9 [Canis lupus familiaris]	4	6	6	24.8	6.35	789000	200000	3.9	-	-	0	1.49445e+06	790000	1.9	89100	44400	2	2280000	1290000	1.8	76600	39400	1.9	3	N	Y	N	N
XP_535701	PSMC6	26S proteasome regulatory subunit 10B [Canis lupus familiaris]	32	10	10	45.8	7.78	-	-	0	313000	80600	3.9	-	-	0	2890000	887000	3.3	574000	512000	1.1	2610000	1050000	2.5	3	Y	Y	N	N
NP_001238880	PSMC1	26S proteasome regulatory subunit 4 [Canis lupus familiaris]	5	2	1	49.2	6.21	-	-	0	-	-	0	140000	83800	1.7	523000	230000	2.3	198000	249000	0.8	473000	265000	1.8	2	N	Y	N	N
XP_533187	PSMC3	26S proteasome regulatory subunit 6A [Canis lupus familiaris]	19	6	6	47.3	5.22	ID only	ID only	1	154000	87700	1.8	-	-	0	622000	474000	1.3	495000	502000	1	470000	403000	1.2	3	N	Y	N	N
XP_005616634	LOC100855613; PSMC4	26S proteasome regulatory subunit 6B [Canis lupus familiaris]	25	5	5	47.3	5.21	-	-	0	ID only	ID only	1	-	-	0	165000	122000	1.4	ID only	ID only	1	ID only	ID only	1	3	N	Y	N	N
XP_533103	PSMC2	26S proteasome regulatory subunit 7 [Canis lupus familiaris]	13	5	5	48.6	5.95	-	-	0	ID only	ID only	1	-	-	0	801000	582000	1.4	310000	374000	0.8	542000	339000	1.6	3	N	Y	N	N
XP_537597	PSMC5	26S proteasome regulatory subunit 8 [Canis lupus familiaris]	24	8	7	45.6	7.55	-	-	0	139000	82000	1.7	-	-	0	1630000	959000	1.7	ID only	ID only	1	1320000	693000	1.9	3	N	Y	N	N
XP_538051	HSD17B10	3-hydroxyacyl-CoA dehydrogenase type-2 [Canis lupus familiaris]	14	5	5	27.1	8.27	-	-	0	-	-	0	284000	124000	2.3	ID only	ID only	1	526000	219000	2.4	243000	149000	1.6	2	Y	Y	N	N
XP_022277438	ACAA2	3-ketoacyl-CoA thiolase, mitochondrial [Canis lupus familiaris]	26	4	4	29.2	8.16	-	-	0	-	-	0	522000	467000	1.1	-	-	0	497000	448000	1.1	-	-	0	2	N	Y	N	N
XP_534222	ACAA1	3-ketoacyl-CoA thiolase, peroxisomal isoform X1 [Canis lupus familiaris]	12	3	3	44.1	8.5	-	-	0	-	-	0	-	-	0	152000	155000	1	ID only	ID only	1	324000	292000	1.1	2	N	Y	N	N
XP_531744	MPST	3-mercaptopyruvate sulfurtransferase [Canis lupus familiaris]	34	6	6	33.1	6.46	208000	68100	3.1	-	-	0	2840000	1720000	1.7	-	-	0	6680000	3900000	1.7	-	-	0	3	N	Y	N	N
XP_850669	BPNT1	3'(2'),5'-bisphosphate nucleotidase 1 isoform X2 [Canis lupus familiaris]	26	8	8	39.5	6.61	-	-	0	-	-	0	1140000	460000	2.5	-	-	0	592000	361000	1.6	-	-	0	2	N	Y	N	N
XP_005621619	ABAT	4-aminobutyrate aminotransferase, mitochondrial [Canis lupus familiaris]	22	21	21	56.6	8.21	4530000	743000	6.1	-	-	0	15500000	8370000	1.9	797000	562000	1.4	33200000	23000000	1.4	1090000	648000	1.7	3	N	Y	N	N
XP_536148	ALDH9A1	4-trimethylaminobutyraldehyde dehydrogenase [Canis lupus familiaris]	14	10	10	54	6.3	11000000	1060000	10.3	166000	71900	2.3	12100000	5790000	2.1	810000	352000	2.3	27300000	20500000	1.3	1250000	613000	2	3	Y	Y	N	N
XP_535079	RPS20	40S ribosomal protein S20 [Canis lupus familiaris]	9	1	1	13.4	9.94	-	-	0	-	-	0	-	-	0	-	-	0	-	-	0	55000	22400	2.5	1	N	N	N	N
XP_013962688	RPS21	40S ribosomal protein S21 [Canis lupus familiaris]	22	1	1	9.1	8.5	116000	6030	19.2	-	-	0	-	-	0	-	-	0	-	-	0	-	-	0	1	N	Y	N	N
NP_001300706	RPS3	40S ribosomal protein S3 [Canis lupus familiaris]	12	2	2	26.7	9.66	-	-	0	ID only	ID only	1	-	-	0	170000	58100	2.9	71700	71400	1	292000	157000	1.9	3	N	Y	N	N
XP_022264091		40S ribosomal protein SA isoform X1 [Canis lupus familiaris]	26	6	6	32.9	4.87	109000	17100	6.4	-	-	0	6250000	2420000	2.6	1600000	881000	1.8	7750000	4800000	1.6	1930000	1390000	1.4	3	Y	Y	N	N
XP_536712	SDF4	45 kDa calcium-binding protein [Canis lupus familiaris]	4	1	1	41.1	4.87	328000	ID only	10	-	-	0	-	-	0	-	-	0	380000	ID only	10	-	-	0	2	Y	N	N	N
NP_001301049	SLC3A2	4F2 cell-surface antigen heavy chain [Canis lupus familiaris]	5	2	2	58.5	5.64	-	-	0	-	-	0	-	-	0	261000	180000	1.5	-	-	0	435000	284000	1.5	2	N	Y	N	N
XP_538569	AGXT2L2; PHYKPL	5-phosphohydroxy-L-lysine phospho-lyase isoform X2 [Canis lupus familiaris]	3	1	1	49.8	6.1	ID only	ID only	1	-	-	0	-	-	0	-	-	0	-	-	0	-	-	0	1	N	Y	N	N
XP_022273603	PRKAA1	5'-AMP-activated protein kinase catalytic subunit alpha-1 isoform X1 [Canis lupus familiaris]	2	2	2	65.3	7.71	-	-	0	-	-	0	-	-	0	ID only	ID only	1	ID only	ID only	1	63700	30300	2.1	2	N	Y	N	N
XP_013963868	PRKAG1	5'-AMP-activated protein kinase subunit gamma-1 isoform X1 [Canis lupus familiaris]	8	2	2	45.5	9.23	806000	88300	9.1	-	-	0	-	-	0	-	-	0	327000	125000	2.6	-	-	0	2	Y	Y	N	N
XP_532271	NT5DC1	5'-nucleotidase domain-containing protein 1 [Canis lupus familiaris]	7	2	2	53.4	7.68	ID only	ID only	1	-	-	0	394000	56300	7	-	-	0	322000	259000	1.2	-	-	0	3	N	N	N	N
XP_535411	PGD	6-phosphogluconate dehydrogenase, decarboxylating [Canis lupus familiaris]	16	22	22	53.1	7.11	46700000	6510000	7.2	189000	90900	2.1	71700000	35600000	2	2430000	1250000	1.9	89600000	66300000	1.4	2340000	1170000	2	3	Y	Y	N	N
XP_852582	PGLS	6-phosphogluconolactonase [Canis lupus familiaris]	14	8	8	27.5	6.54	7020000	1370000	5.1	-	-	0	12900000	5580000	2.3	-	-	0	17300000	8250000	2.1	79700	65700	1.2	3	Y	Y	N	N
XP_854076	PTS	6-pyruvoyl tetrahydrobiopterin synthase [Canis lupus familiaris]	11	2	2	16.6	7.12	424000	139000	3	-	-	0	226000	99900	2.3	-	-	0	598000	178000	3.4	-	-	0	3	Y	N	N	N
XP_013966511	HSPD1	60 kDa heat shock protein, mitochondrial [Canis lupus familiaris]	29	12	12	61	6	576000	485000	1.2	398000	379000	1	2380000	3770000	0.6	4750000	4520000	1.1	6320000	7060000	0.9	5900000	4500000	1.3	3	N	Y	N	N
XP_533197	RPLP2	60S acidic ribosomal protein P2 [Canis lupus familiaris]	29	1	1	11.7	4.61	-	-	0	-	-	0	-	-	0	-	-	0	-	-	0	ID only	ID only	1	1	N	Y	N	N
XP_548097	NT5C3L; NT5C3B	7-methylguanosine phosphate-specific 5'-nucleotidase isoform X1 [Canis lupus familiaris]	38	9	9	34.6	5.94	4860000	875000	5.5	-	-	0	8090000	3050000	2.7	ID only	ID only	1	19200000	8170000	2.3	-	-	0	3	Y	Y	N	N
XP_547012	NUDT1	7,8-dihydro-8-oxoguanine triphosphatase [Canis lupus familiaris]	8	1	1	18.1	5.22	-	-	0	-	-	0	ID only	ID only	1	-	-	0	-	-	0	-	-	0	1	N	N	N	N
XP_863385	HSPA5	78 kDa glucose-regulated protein [Canis lupus familiaris]	40	36	34	72.2	5.16	116000000	100000000	1.2	2470000	1050000	2.4	371000000	273000000	1.4	13500000	8450000	1.6	492000000	355000000	1.4	25100000	15100000	1.7	3	N	Y	Y	Y
XP_003433756	ABI1	abl interactor 1 isoform X1 [Canis lupus familiaris]	16	6	4	55	7.06	-	-	0	ID only	27500	0.5	-	-	0	720000	336000	2.1	ID only	234000	0.5	1410000	237000	5.9	3	Y	Y	N	N
XP_005640620	ABI2	abl interactor 2 isoform X1 [Canis lupus familiaris]	6	3	1	58.6	6.13	-	-	0	-	-	0	-	-	0	-	-	0	-	-	0	51400	ID only	10	1	N	Y	N	N
XP_541180	ACAT2	acetyl-CoA acetyltransferase, cytosolic [Canis lupus familiaris]	14	9	9	41	7.23	416000	169000	2.5	-	-	0	1760000	1280000	1.4	-	-	0	7900000	6570000	1.2	165000	ID only	10	3	N	Y	N	N
XP_005619885	ACAT1	acetyl-CoA acetyltransferase, mitochondrial isoform X1 [Canis lupus familiaris]	3	8	8	46.2	7.83	920000	52500	17.5	ID only	ID only	1	503000	308000	1.6	-	-	0	1630000	1370000	1.2	161000	ID only	10	3	N	Y	N	N
XP_534200	ACSS1	acetyl-coenzyme A synthetase 2-like, mitochondrial [Canis lupus familiaris]	4	6	6	74.4	8.25	60400	66100	0.9	-	-	0	1710000	1740000	1	ID only	ID only	1	2090000	1800000	1.2	ID only	ID only	1	3	N	Y	N	N
XP_022264936	ACSS2	acetyl-coenzyme A synthetase, cytoplasmic isoform X1 [Canis lupus familiaris]	2	6	6	80.5	6.73	27800	20400	1.4	-	-	0	1960000	825000	2.4	-	-	0	2860000	1760000	1.6	64200	ID only	10	3	N	Y	N	N
XP_013969677	ACHE	acetylcholinesterase [Canis lupus familiaris]	21	9	9	67.3	6.13	-	-	0	163000	32100	5.1	248000	45400	5.5	5610000	937000	6	254000	280000	0.9	6870000	1290000	5.3	3	Y	N	N	N
XP_849166	ACO2	aconitate hydratase, mitochondrial [Canis lupus familiaris]	9	9	9	85.7	7.94	491000	590000	0.8	ID only	ID only	1	4530000	3660000	1.2	-	-	0	5120000	4170000	1.2	103000	52700	2	3	N	Y	N	N
XP_022269979	ACTL6A	actin-like protein 6A isoform X1 [Canis lupus familiaris]	14	3	3	50.3	5.71	-	-	0	-	-	0	ID only	ID only	1	-	-	0	707000	107000	6.6	-	-	0	2	N	N	N	N
XP_851943	ACTR10	actin-related protein 10 [Canis lupus familiaris]	3	1	1	46.2	7.61	-	-	0	-	-	0	-	-	0	ID only	ID only	1	-	-	0	-	-	0	1	N	Y	N	N
XP_538516	ACTR2	actin-related protein 2 isoform X2 [Canis lupus familiaris]	30	15	15	44.7	6.74	21600000	9440000	2.3	9850000	1840000	5.3	36000000	22100000	1.6	18000000	6940000	2.6	55500000	45400000	1.2	21700000	8150000	2.7	3	Y	Y	Y	N
XP_536873	ARPC1A	actin-related protein 2/3 complex subunit 1A [Canis lupus familiaris]	15	5	4	41.5	8.18	112000	65400	1.7	ID only	ID only	1	844000	502000	1.7	312000	92800	3.4	820000	538000	1.5	ID only	ID only	1	3	N	Y	N	N
XP_536872	ARPC1B	actin-related protein 2/3 complex subunit 1B [Canis lupus familiaris]	56	21	20	41	8.15	4740000	1630000	2.9	3420000	483000	7.1	46700000	33200000	1.4	19100000	6270000	3	73200000	47500000	1.5	16300000	4900000	3.3	3	Y	Y	Y	N
XP_022270850	ARPC2	actin-related protein 2/3 complex subunit 2 [Canis lupus familiaris]	42	13	13	33.8	8.12	9660000	2820000	3.4	2760000	618000	4.5	12700000	10200000	1.2	8100000	2420000	3.3	26900000	16900000	1.6	6120000	1960000	3.1	3	Y	Y	Y	N
XP_022266143	LOC100856747; ARPC3	actin-related protein 2/3 complex subunit 3 isoform X1 [Canis lupus familiaris]	13	2	2	22	8.57	2170000	1200000	1.8	1050000	313000	3.4	-	-	0	4540000	2070000	2.2	-	-	0	-	-	0	2	Y	Y	Y	N
XP_003639957	LOC100856747; ARPC3	actin-related protein 2/3 complex subunit 3 isoform X2 [Canis lupus familiaris]	15	3	3	20.5	8.59	-	-	0	-	-	0	7130000	5340000	1.3	-	-	0	1840000	759000	2.4	5440000	2020000	2.7	2	N	Y	N	N
XP_013977066	ARPC4	actin-related protein 2/3 complex subunit 4 [Canis lupus familiaris]	54	10	10	19.7	8.43	8760000	5350000	1.6	3090000	1620000	1.9	24900000	14500000	1.7	9920000	3980000	2.5	59600000	25300000	2.4	14100000	5270000	2.7	3	Y	Y	Y	N
XP_537159	ARPC5	actin-related protein 2/3 complex subunit 5 [Canis lupus familiaris]	62	8	8	16.3	5.67	2090000	730000	2.9	1530000	785000	1.9	13000000	8370000	1.6	3270000	1120000	2.9	24000000	7910000	3	9820000	3570000	2.8	3	Y	Y	Y	N
XP_853309	ACTR3B; ACTR3	actin-related protein 3 [Canis lupus familiaris]	67	18	17	42	5.62	35500000	9950000	3.6	7470000	2280000	3.3	46100000	23700000	1.9	25600000	11200000	2.3	78600000	57200000	1.4	21700000	8760000	2.5	3	Y	Y	Y	N
XP_532772	ACTR3; ACTR3B	actin-related protein 3B isoform X1 [Canis lupus familiaris]	7	3	1	47.6	5.88	-	-	0	-	-	0	-	-	0	21700	281000	0.1	3160000	3040000	1	2640000	591000	4.5	2	N	Y	N	N
XP_535424	ACTC1	actin, alpha cardiac muscle 1 [Canis lupus familiaris]	71	26	3	42	5.39	135000000	19100000	7	9820000	4260000	2.3	172000000	74200000	2.3	30000000	22500000	1.3	-	-	0	-	-	0	2	Y	N	N	N
XP_005618896	ACTA1	actin, alpha skeletal muscle [Canis lupus familiaris]	73	28	4	42	5.85	652000	621000	1	ID only	ID only	1	ID only	ID only	1	ID only	140000	0.5	141000000	76600000	1.8	31500000	9420000	3.4	3	N	Y	Y	N
XP_534781	ACTA2	actin, aortic smooth muscle [Canis lupus familiaris]	84	32	6	42	5.39	-	-	0	-	-	0	-	-	0	-	-	0	190000000	94600000	2	62800000	46400000	1.4	1	N	Y	N	N
NP_001003349	ACTG1	actin, cytoplasmic 2 [Canis lupus familiaris]	90	31	1	41.7	5.38	-	-	0	ID only	ID only	1	-	-	0	-	-	0	-	-	0	-	-	0	1	N	Y	Y	Y
XP_537523	AHSA1	activator of 90 kDa heat shock protein ATPase homolog 1 [Canis lupus familiaris]	22	4	4	38.3	5.43	-	-	0	-	-	0	342000	132000	2.6	-	-	0	1700000	620000	2.7	-	-	0	2	Y	Y	N	N
XP_003639872	LOC100856488; ACAD11	acyl-CoA dehydrogenase family member 11 isoform X1 [Canis lupus familiaris]	2	1	1	86.9	8	-	-	0	-	-	0	-	-	0	-	-	0	-	-	0	62000	59200	1	1	N	N	N	N
XP_013976845	DBI	acyl-CoA-binding protein isoform X1 [Canis lupus familiaris]	18	3	3	10.2	8.29	1230000	121000	10.1	-	-	0	12200000	6220000	2	-	-	0	780000	459000	1.7	-	-	0	3	Y	Y	N	N
XP_547892	ACOT2; LOC490770	acyl-coenzyme A thioesterase 1 isoform X2 [Canis lupus familiaris]	9	2	2	48.4	8.4	-	-	0	-	-	0	-	-	0	-	-	0	195000	174000	1.1	-	-	0	1	N	Y	N	N
XP_003638952	LOC100855579; LYPLA2	acyl-protein thioesterase 2 [Canis lupus familiaris]	8	1	1	24.7	7.23	-	-	0	-	-	0	292000	47500	6.2	-	-	0	414000	ID only	10	-	-	0	2	Y	Y	N	N
XP_005632596	APEH	acylamino-acid-releasing enzyme isoform X1 [Canis lupus familiaris]	1	1	1	82.6	5.68	ID only	ID only	1	-	-	0	-	-	0	-	-	0	-	-	0	-	-	0	1	N	Y	N	N
XP_533826	APEH	acylamino-acid-releasing enzyme isoform X2 [Canis lupus familiaris]	16	5	5	81.4	5.55	-	-	0	-	-	0	1730000	1400000	1.2	-	-	0	1840000	1340000	1.4	-	-	0	2	N	Y	N	N
XP_005623727	ACYP1	acylphosphatase-1 isoform X1 [Canis lupus familiaris]	10	1	1	11.5	8.97	-	-	0	-	-	0	ID only	ID only	1	-	-	0	-	-	0	-	-	0	1	N	Y	N	N
XP_022280440	ACYP2	acylphosphatase-2 isoform X1 [Canis lupus familiaris]	11	2	2	18.4	10.11	907000	103000	8.8	-	-	0	-	-	0	-	-	0	-	-	0	-	-	0	1	N	Y	N	N
XP_022280451	ACYP2	acylphosphatase-2 isoform X6 [Canis lupus familiaris]	26	2	2	14	10.05	-	-	0	-	-	0	779000	400000	1.9	-	-	0	1040000	614000	1.7	-	-	0	2	N	Y	N	N
XP_003435250	CRK	adapter molecule crk isoform X1 [Canis lupus familiaris]	6	8	8	33.8	5.55	609000	205000	3	-	-	0	5960000	2670000	2.2	ID only	ID only	1	-	-	0	ID only	ID only	1	3	Y	Y	N	N
XP_003435251	CRK	adapter molecule crk isoform X3 [Canis lupus familiaris]	81	12	12	22.9	5.48	-	-	0	-	-	0	-	-	0	-	-	0	14700000	8510000	1.7	-	-	0	1	N	Y	N	N
XP_536752	APRT	adenine phosphoribosyltransferase isoform X1 [Canis lupus familiaris]	51	7	7	19.7	6.57	ID only	ID only	1	-	-	0	1230000	441000	2.8	-	-	0	4630000	1380000	3.3	-	-	0	3	Y	Y	N	N
XP_022265169	ADA	adenosine deaminase isoform X2 [Canis lupus familiaris]	34	26	10	42	5.81	77800000	15400000	5	1470000	487000	3	26300000	14800000	1.8	2600000	1150000	2.3	40900000	29900000	1.4	3480000	2110000	1.7	3	Y	Y	N	N
XP_005635156	ADA	adenosine deaminase isoform X3 [Canis lupus familiaris]	87	27	2	41.1	5.69	307000000	60000000	5.1	-	-	0	300000000	162000000	1.9	-	-	0	436000000	289000000	1.5	-	-	0	3	N	Y	N	N
XP_005619117	ADK	adenosine kinase isoform X1 [Canis lupus familiaris]	50	13	13	43.6	6.7	2970000	228000	13	-	-	0	7730000	2910000	2.7	-	-	0	9610000	5600000	1.7	-	-	0	3	Y	Y	N	N
XP_534388	AHCY	adenosylhomocysteinase [Canis lupus familiaris]	10	12	12	47.7	6.39	13500000	2210000	6.1	78100	19500	4	13700000	8510000	1.6	468000	202000	2.3	22500000	15500000	1.5	388000	174000	2.2	3	Y	Y	N	N
NP_001182076	ADCY6	adenylate cyclase type 6 [Canis lupus familiaris]	3	5	5	130.3	8.27	-	-	0	52800	45400	1.2	-	-	0	410000	212000	1.9	-	-	0	215000	59100	3.6	3	N	Y	N	N
XP_005617670	AK2	adenylate kinase 2, mitochondrial isoform X1 [Canis lupus familiaris]	28	3	3	26.6	7.02	-	-	0	-	-	0	265000	284000	0.9	-	-	0	2390000	1640000	1.5	-	-	0	2	N	Y	N	N
NP_001124519	AK1	adenylate kinase isoenzyme 1 [Canis lupus familiaris]	16	9	9	23.4	8.6	11200000	3910000	2.9	-	-	0	18900000	8980000	2.1	ID only	ID only	1	33200000	9970000	3.3	ID only	ID only	1	3	Y	Y	N	N
XP_531727	ADSL	adenylosuccinate lyase isoform X2 [Canis lupus familiaris]	2	5	5	55.4	6.48	1260000	125000	10.1	-	-	0	2970000	1990000	1.5	142000	ID only	10	2790000	2330000	1.2	162000	41000	4	3	Y	Y	N	N
XP_022276859	ADSS	adenylosuccinate synthetase isozyme 2 isoform X1 [Canis lupus familiaris]	4	1	1	52.7	6.61	ID only	ID only	1	-	-	0	658000	68500	9.6	-	-	0	869000	598000	1.5	-	-	0	3	N	Y	N	N
XP_005628950	CAP1	adenylyl cyclase-associated protein 1 isoform X1 [Canis lupus familiaris]	70	25	18	51.4	7.52	12500000	4750000	2.6	11800000	3230000	3.6	11600000	5700000	2	3090000	929000	3.3	17100000	11500000	1.5	3080000	2430000	1.3	3	Y	Y	Y	N
XP_013974803	CAP1	adenylyl cyclase-associated protein 1 isoform X2 [Canis lupus familiaris]	70	25	1	51.4	7.52	108000000	25400000	4.2	-	-	0	117000000	58600000	2	31500000	20300000	1.6	200000000	144000000	1.4	31100000	17800000	1.7	3	Y	Y	N	N
XP_005639770	ADIPOQ	adiponectin isoform X1 [Canis lupus familiaris]	4	1	1	27.4	6.61	-	-	0	-	-	0	305000	84100	3.6	-	-	0	669000	290000	2.3	119000	30400	3.9	2	Y	N	N	N
XP_005638630	ADPGK	ADP-dependent glucokinase isoform X1 [Canis lupus familiaris]	3	1	1	53.7	6.29	339000	4090	82.8	-	-	0	202000	12700	15.8	-	-	0	289000	ID only	10	-	-	0	3	Y	Y	N	N
XP_535647	NUDT9	ADP-ribose pyrophosphatase, mitochondrial [Canis lupus familiaris]	3	1	1	38.8	7.05	-	-	0	-	-	0	200000	139000	1.4	-	-	0	326000	283000	1.2	-	-	0	2	N	N	N	N
NP_001003143	CD38	ADP-ribosyl cyclase/cyclic ADP-ribose hydrolase 1 [Canis lupus familiaris]	16	3	3	35.1	7.84	-	-	0	316000	67900	4.7	-	-	0	218000	78400	2.8	-	-	0	2290000	811000	2.8	3	Y	Y	N	N
XP_003640166	LOC100855709; ADPRH	ADP-ribosylarginine hydrolase [Canis lupus familiaris]	17	4	4	40.2	6.47	-	-	0	-	-	0	349000	66000	5.3	-	-	0	619000	244000	2.5	-	-	0	2	Y	Y	N	N
NP_001238856	ARF1; LOC100856517	ADP-ribosylation factor 1 [Canis lupus familiaris]	6	2	2	20.7	6.95	600000	93900	6.4	678000	326000	2.1	-	-	0	313000	83100	3.8	-	-	0	-	-	0	2	Y	Y	N	N
XP_543688	ARF3	ADP-ribosylation factor 3 [Canis lupus familiaris]	54	6	6	20.6	7.43	-	-	0	-	-	0	-	-	0	-	-	0	-	-	0	2640000	575000	4.6	1	N	Y	N	N
XP_003639402	LOC100856583; ARL6IP1	ADP-ribosylation factor-like protein 6-interacting protein 1 [Canis lupus familiaris]	12	2	2	23.4	9.32	-	-	0	-	-	0	-	-	0	-	-	0	-	-	0	596000	207000	2.9	1	N	Y	N	N
XP_853013	ARL8B	ADP-ribosylation factor-like protein 8B [Canis lupus familiaris]	8	1	1	21.5	8.43	-	-	0	-	-	0	-	-	0	180000	78500	2.3	-	-	0	141000	120000	1.2	2	N	Y	N	N
XP_022263523	NUDT5	ADP-sugar pyrophosphatase isoform X1 [Canis lupus familiaris]	6	1	1	24.3	5.16	-	-	0	-	-	0	ID only	ID only	1	-	-	0	345000	158000	2.2	-	-	0	2	N	Y	N	N
XP_851701	SLC25A5	ADP/ATP translocase 2 [Canis lupus familiaris]	18	4	2	33	9.77	-	-	0	-	-	0	-	-	0	338000	163000	2.1	-	-	0	79300	56500	1.4	2	N	Y	N	N
XP_022271780	SLC25A6	ADP/ATP translocase 3 [Canis lupus familiaris]	17	4	1	34.9	9.64	-	-	0	717000	91400	7.8	-	-	0	-	-	0	-	-	0	1380000	966000	1.4	2	N	Y	N	N
XP_532408	AFM	afamin [Canis lupus familiaris]	7	4	4	69.1	5.35	-	-	0	-	-	0	1210000	199000	6.1	-	-	0	2960000	678000	4.4	-	-	0	2	Y	Y	Y	Y
XP_535385	AKR7A2; LOC478210	aflatoxin B1 aldehyde reductase member 2 [Canis lupus familiaris]	18	5	5	40.6	7.94	714000	29400	24.3	ID only	ID only	1	855000	627000	1.4	-	-	0	2430000	1250000	1.9	-	-	0	3	N	Y	N	N
XP_013969497	AARS	alanine--tRNA ligase, cytoplasmic [Canis lupus familiaris]	5	11	11	106.7	5.45	966000	888000	1.1	ID only	ID only	1	3880000	2380000	1.6	-	-	0	6150000	4450000	1.4	349000	116000	3	3	N	Y	N	N
XP_005624490	AARSD1	alanyl-tRNA editing protein Aarsd1 isoform X1 [Canis lupus familiaris]	8	2	2	45.2	6.27	ID only	ID only	1	-	-	0	-	-	0	-	-	0	ID only	ID only	1	-	-	0	2	N	N	N	N
NP_001239097	AKR1A1	alcohol dehydrogenase [NADP(+)] [Canis lupus familiaris]	7	13	12	36.6	7.52	2370000	770000	3.1	-	-	0	18000000	13100000	1.4	163000	66700	2.4	34400000	22200000	1.5	254000	205000	1.2	3	N	Y	N	N
NP_001239084	ADH5	alcohol dehydrogenase class-3 [Canis lupus familiaris]	31	7	7	39.6	7.5	328000	120000	2.7	-	-	0	5810000	3980000	1.5	-	-	0	1750000	1430000	1.2	-	-	0	3	N	Y	N	N
XP_851694	ALDH16A1	aldehyde dehydrogenase family 16 member A1 isoform X1 [Canis lupus familiaris]	2	2	2	92.1	8.02	ID only	ID only	1	-	-	0	207000	93500	2.2	439000	245000	1.8	610000	578000	1.1	277000	166000	1.7	3	N	Y	N	N
NP_001075889	ALDH3A1	aldehyde dehydrogenase, dimeric NADP-preferring [Canis lupus familiaris]	5	1	1	50.7	6.89	-	-	0	-	-	0	-	-	0	-	-	0	ID only	ID only	1	-	-	0	1	N	N	N	N
XP_013963474	ALDH2	aldehyde dehydrogenase, mitochondrial isoform X1 [Canis lupus familiaris]	12	5	5	58.8	6.55	954000	33700	28.3	-	-	0	847000	495000	1.7	-	-	0	1330000	661000	2	-	-	0	3	Y	N	N	N
XP_540154	GALM	aldose 1-epimerase isoform X1 [Canis lupus familiaris]	8	2	2	37.5	6.4	-	-	0	-	-	0	460000	295000	1.6	-	-	0	623000	327000	1.9	-	-	0	2	N	Y	N	N
NP_001239345	AKR1B1	aldose reductase [Canis lupus familiaris]	3	9	9	35.7	6.98	10300000	3320000	3.1	-	-	0	13700000	7670000	1.8	156000	55600	2.8	34100000	15800000	2.2	164000	91700	1.8	3	Y	Y	N	N
XP_853575	AAGAB	alpha- and gamma-adaptin-binding protein p34 isoform X1 [Canis lupus familiaris]	6	1	1	34.6	4.68	-	-	0	-	-	0	-	-	0	-	-	0	-	-	0	ID only	ID only	1	1	N	Y	N	N
XP_537546	SERPINA3; LOC480425	alpha-1-antichymotrypsin [Canis lupus familiaris]	21	5	5	47.1	6.11	440000	ID only	10	-	-	0	3300000	440000	7.5	-	-	0	3000000	440000	6.8	-	-	0	3	Y	Y	Y	N
XP_022277465	SERPINA1	alpha-1-antitrypsin isoform X1 [Canis lupus familiaris]	8	4	4	46.7	6.18	32000000	1390000	23.1	ID only	ID only	1	48600000	7750000	6.3	786000	199000	4	69400000	15700000	4.4	689000	330000	2.1	3	Y	Y	Y	Y
XP_855658	MGAT1	alpha-1,3-mannosyl-glycoprotein 2-beta-N-acetylglucosaminyltransferase [Canis lupus familiaris]	3	1	1	51.6	8.81	130000	ID only	10	-	-	0	-	-	0	-	-	0	-	-	0	-	-	0	1	N	Y	N	N
XP_005616085	A1BG; ZNF837	alpha-1B-glycoprotein [Canis lupus familiaris]	46	12	12	61.3	6.21	5800000	940000	6.2	-	-	0	14300000	1880000	7.6	-	-	0	27500000	4800000	5.7	-	-	0	3	Y	Y	Y	Y
XP_005624992	SERPINF2	alpha-2-antiplasmin isoform X2 [Canis lupus familiaris]	17	12	12	61.8	7.43	7350000	760000	9.7	115000	15900	7.3	60300000	8160000	7.4	2540000	198000	12.8	79500000	12500000	6.4	3390000	258000	13.1	3	Y	Y	N	N
XP_005639865	AHSG	alpha-2-HS-glycoprotein [Canis lupus familiaris]	8	9	9	39.2	5.31	11600000	1810000	6.4	86500	34900	2.5	16500000	3570000	4.6	874000	464000	1.9	28500000	12500000	2.3	ID only	ID only	1	3	Y	Y	Y	Y
XP_534893	A2M; LOC477699	alpha-2-macroglobulin [Canis lupus familiaris]	2	2	2	165.1	6.71	21800	28100	0.8	-	-	0	-	-	0	-	-	0	-	-	0	-	-	0	1	N	Y	Y	Y
XP_853103	ACTN1	alpha-actinin-1 isoform X1 [Canis lupus familiaris]	82	77	1	105.4	5.41	221000000	158000000	1.4	-	-	0	334000	230000	1.5	110000000	66700000	1.6	181000	208000	0.9	-	-	0	3	N	Y	Y	N
XP_866874	ACTN1	alpha-actinin-1 isoform X4 [Canis lupus familiaris]	72	78	32	102.9	5.41	1380000	1000000	1.4	28000000	6600000	4.2	993000000	662000000	1.5	662000	514000	1.3	1520000000	1140000000	1.3	148000000	69700000	2.1	3	Y	Y	N	N
XP_536333	ACTN2	alpha-actinin-2 isoform X2 [Canis lupus familiaris]	20	23	4	103.8	5.52	-	-	0	-	-	0	367000	514000	0.7	-	-	0	21000000	16200000	1.3	-	-	0	2	N	Y	N	N
XP_005631486	ACTN3	alpha-actinin-3 isoform X1 [Canis lupus familiaris]	13	17	1	121.6	6.52	-	-	0	-	-	0	-	-	0	-	-	0	ID only	ID only	1	-	-	0	1	N	N	N	N
XP_541640	ACTN4	alpha-actinin-4 isoform X1 [Canis lupus familiaris]	39	31	16	107.3	5.43	-	-	0	1230000	389000	3.2	-	-	0	6030000	4860000	1.2	-	-	0	-	-	0	2	N	Y	Y	Y
XP_853410	ACTN4	alpha-actinin-4 isoform X3 [Canis lupus familiaris]	41	60	37	104.9	5.44	11900000	9700000	1.2	-	-	0	85800000	60300000	1.4	-	-	0	133000000	102000000	1.3	7820000	4590000	1.7	3	N	Y	N	N
NP_001003164	ACTR1A	alpha-centractin [Canis lupus familiaris]	32	8	6	42.6	6.64	775000	129000	6	715000	342000	2.1	748000	279000	2.7	5820000	3310000	1.8	2970000	2680000	1.1	6680000	3670000	1.8	3	Y	Y	N	N
XP_536735	ENO1	alpha-enolase [Canis lupus familiaris]	36	28	9	49	8.22	335000000	71000000	4.7	3050000	1020000	3	347000000	173000000	2	13900000	7210000	1.9	481000000	303000000	1.6	12300000	5920000	2.1	3	Y	Y	Y	Y
XP_013972892	LOC476315	alpha-enolase-like [Canis lupus familiaris]	28	24	6	47.3	7.06	42800000	12900000	3.3	295000	65300	4.5	103000000	53600000	1.9	5000000	2580000	1.9	118000000	102000000	1.2	476000	323000	1.5	3	N	Y	N	N
XP_538109	GLA	alpha-galactosidase A [Canis lupus familiaris]	29	9	9	47.6	6.77	2230000	24000	92.9	-	-	0	7550000	614000	12.3	275000	47100	5.8	15200000	1480000	10.3	-	-	0	3	Y	Y	N	N
XP_022272289	MAN2A1	alpha-mannosidase 2 [Canis lupus familiaris]	1	1	1	125.3	7.46	-	-	0	-	-	0	ID only	ID only	1	-	-	0	-	-	0	-	-	0	1	N	Y	Y	N
XP_005638775	MAN2C1	alpha-mannosidase 2C1 [Canis lupus familiaris]	1	3	3	116.5	6.79	-	-	0	29300	18500	1.6	175000	173000	1	ID only	ID only	1	487000	578000	0.8	203000	141000	1.4	3	N	Y	N	N
XP_005625870	NAGA	alpha-N-acetylgalactosaminidase [Canis lupus familiaris]	14	4	4	46.4	5.35	90700	ID only	10	-	-	0	582000	61200	9.5	-	-	0	1260000	82400	15.3	-	-	0	3	Y	Y	N	N
XP_852154	NAPA	alpha-soluble NSF attachment protein isoform X1 [Canis lupus familiaris]	33	8	8	33.2	5.35	899000	191000	4.7	880000	193000	4.6	1780000	510000	3.5	683000	191000	3.6	3800000	1490000	2.5	1600000	516000	3.1	3	Y	Y	N	N
XP_005628348	PPBP; LOC106557449	alveolar macrophage chemotactic factor-like [Canis lupus familiaris]	33	4	4	12.4	10.13	-	-	0	-	-	0	100000	ID only	10	ID only	ID only	1	3590000	203000	17.7	2580000	105000	24.5	2	Y	N	N	N
XP_854170	PPAT	amidophosphoribosyltransferase isoform X1 [Canis lupus familiaris]	4	1	1	57.1	6.92	-	-	0	-	-	0	ID only	ID only	1	-	-	0	ID only	ID only	1	-	-	0	2	N	Y	N	N
XP_545016	AIMP1	aminoacyl tRNA synthase complex-interacting multifunctional protein 1 isoform X1 [Canis lupus familiaris]	6	1	1	35.4	8.5	-	-	0	-	-	0	213000	49300	4.3	-	-	0	-	-	0	129000	97700	1.3	2	N	Y	N	N
XP_536880	AIMP2	aminoacyl tRNA synthase complex-interacting multifunctional protein 2 isoform X1 [Canis lupus familiaris]	8	1	1	35.3	7.46	-	-	0	-	-	0	-	-	0	ID only	ID only	1	-	-	0	ID only	ID only	1	2	N	Y	N	N
XP_533806	ACY1	aminoacylase-1 [Canis lupus familiaris]	6	1	1	45.4	5.99	ID only	ID only	1	-	-	0	ID only	ID only	1	-	-	0	ID only	ID only	1	-	-	0	3	N	Y	N	N
XP_547357	RNPEP	aminopeptidase B isoform X1 [Canis lupus familiaris]	12	6	6	72.2	5.45	142000	90200	1.6	-	-	0	2420000	1480000	1.6	-	-	0	2850000	2300000	1.2	-	-	0	3	N	Y	N	N
XP_005621872	AMPD2	AMP deaminase 2 isoform X4 [Canis lupus familiaris]	3	2	2	94.7	6.44	-	-	0	91300	30300	3	-	-	0	725000	314000	2.3	438000	349000	1.3	630000	257000	2.5	3	Y	Y	N	N
NP_001006601	APP	amyloid-beta A4 protein isoform APP-770 precursor [Canis lupus familiaris]	1	1	1	86.9	4.82	-	-	0	-	-	0	-	-	0	-	-	0	467000	56800	8.2	-	-	0	1	N	Y	Y	N
XP_022266630	CIAPIN1	anamorsin [Canis lupus familiaris]	11	2	2	33.8	5.47	-	-	0	-	-	0	-	-	0	-	-	0	71400	23300	3.1	-	-	0	1	N	Y	N	N
XP_005627860	ANGPT1	angiopoietin-1 isoform X1 [Canis lupus familiaris]	8	3	3	57.5	6.76	-	-	0	101000	4280	23.5	-	-	0	597000	39300	15.2	-	-	0	-	-	0	2	Y	Y	Y	N
XP_003639297	ACE; LOC610668	angiotensin-converting enzyme [Canis lupus familiaris]	7	7	7	151.2	6.81	ID only	ID only	1	109000	64200	1.7	796000	606000	1.3	838000	420000	2	2240000	1460000	1.5	2890000	1540000	1.9	3	N	N	N	N
XP_005618890	AGT	angiotensinogen [Canis lupus familiaris]	25	7	7	51.7	5.99	7690000	142000	54.2	-	-	0	5990000	943000	6.4	-	-	0	10900000	1530000	7.1	-	-	0	3	Y	Y	Y	N
XP_003432104	LOC100686744; PRSS2	anionic trypsin [Canis lupus familiaris]	8	1	1	26.4	4.83	-	-	0	-	-	0	-	-	0	ID only	ID only	1	428000	ID only	10	-	-	0	2	N	N	N	N
XP_003639531	LOC100856722; ANKMY2	ankyrin repeat and MYND domain-containing protein 2 isoform X1 [Canis lupus familiaris]	3	1	1	49.1	6.04	-	-	0	-	-	0	-	-	0	-	-	0	ID only	ID only	1	-	-	0	1	N	Y	N	N
XP_005620611	ANKRD11	ankyrin repeat domain-containing protein 11 isoform X1 [Canis lupus familiaris]	1	1	1	294.8	6.77	-	-	0	-	-	0	136000	67900	2	-	-	0	-	-	0	-	-	0	1	N	N	N	N
XP_022266014	ANKRD13A	ankyrin repeat domain-containing protein 13A isoform X1 [Canis lupus familiaris]	4	1	1	68.1	5.19	-	-	0	-	-	0	-	-	0	-	-	0	ID only	ID only	1	-	-	0	1	N	Y	N	N
XP_005629869	LOC100686820; ANK1	ankyrin-1 isoform X1 [Canis lupus familiaris]	10	12	12	210.1	6.2	-	-	0	ID only	ID only	1	-	-	0	-	-	0	-	-	0	3870000	1980000	2	2	N	Y	N	N
XP_022259693	LOC100686820; ANK1	ankyrin-1 isoform X2 [Canis lupus familiaris]	21	24	24	209.3	6.19	-	-	0	-	-	0	-	-	0	10800000	5310000	2	-	-	0	-	-	0	1	N	Y	N	N
XP_536401	ANXA11	annexin A11 [Canis lupus familiaris]	31	12	12	54.4	7.65	9930000	2690000	3.7	11500000	2450000	4.7	10600000	4390000	2.4	17300000	4190000	4.1	24600000	14900000	1.7	30200000	10400000	2.9	3	Y	Y	N	N
NP_001002961	ANXA2	annexin A2 [Canis lupus familiaris]	14	3	3	38.6	7.31	-	-	0	-	-	0	277000	ID only	10	-	-	0	-	-	0	-	-	0	1	N	N	N	N
XP_022279717	ANXA4	annexin A4 isoform X1 [Canis lupus familiaris]	3	1	1	35.9	5.88	-	-	0	-	-	0	151000	94600	1.6	-	-	0	114000	99700	1.1	-	-	0	2	N	Y	N	N
XP_533303	ANXA5	annexin A5 isoform X1 [Canis lupus familiaris]	16	18	18	35.9	5.08	13900000	4700000	3	534000	96800	5.5	64900000	43900000	1.5	4390000	1290000	3.4	79700000	48800000	1.6	3090000	1190000	2.6	3	Y	Y	N	N
XP_005619331	ANXA6	annexin A6 isoform X1 [Canis lupus familiaris]	2	2	2	75.8	5.68	-	-	0	-	-	0	717000	443000	1.6	-	-	0	189000	154000	1.2	-	-	0	2	N	Y	N	N
XP_536388	ANXA7	annexin A7 isoform X1 [Canis lupus familiaris]	9	2	2	52.5	5.68	-	-	0	73300	9160	8	342000	169000	2	-	-	0	-	-	0	-	-	0	2	N	Y	N	N
XP_005637010	ANO6	anoctamin-6 isoform X1 [Canis lupus familiaris]	10	6	6	108	7.56	-	-	0	109000	33400	3.3	-	-	0	1610000	880000	1.8	-	-	0	4730000	2510000	1.9	3	N	Y	N	N
XP_537187	SERPINC1	antithrombin-III [Canis lupus familiaris]	4	21	21	52.4	6.7	14400000	714000	20.1	-	-	0	51000000	10700000	4.8	ID only	ID only	1	48700000	10700000	4.6	183000	47000	3.9	3	Y	Y	Y	Y
XP_852198	AP1B1	AP-1 complex subunit beta-1 isoform X1 [Canis lupus familiaris]	18	11	6	104.7	5.06	859000	47600	18	889000	164000	5.4	574000	117000	4.9	348000	72900	4.8	1330000	542000	2.4	4870000	2330000	2.1	3	Y	Y	N	N
XP_003434755	AP1G1	AP-1 complex subunit gamma-1 isoform X1 [Canis lupus familiaris]	4	2	2	91.7	6.8	-	-	0	-	-	0	-	-	0	51300	22400	2.3	-	-	0	331000	161000	2.1	2	Y	Y	N	N
XP_003432952	AP1M1	AP-1 complex subunit mu-1 isoform X1 [Canis lupus familiaris]	22	7	7	49.7	7.62	-	-	0	446000	137000	3.3	-	-	0	1910000	684000	2.8	ID only	ID only	1	2190000	907000	2.4	3	Y	Y	N	N
XP_003434784	AP1S1	AP-1 complex subunit sigma-1A [Canis lupus familiaris]	16	2	2	18.7	5.73	ID only	ID only	1	401000	158000	2.5	150000	71000	2.1	1330000	421000	3.2	319000	136000	2.4	1680000	699000	2.4	3	Y	Y	N	N
XP_854230	AP1S2	AP-1 complex subunit sigma-2 isoform X3 [Canis lupus familiaris]	16	2	2	18.6	5.47	-	-	0	-	-	0	-	-	0	51200	ID only	10	-	-	0	236000	41700	5.7	2	Y	Y	N	N
XP_541490	AP2A1	AP-2 complex subunit alpha-1 isoform X1 [Canis lupus familiaris]	15	9	6	107.6	7.03	-	-	0	52600	33700	1.6	-	-	0	407000	174000	2.3	ID only	ID only	1	2730000	1110000	2.5	3	Y	Y	N	N
XP_022261216	AP2A2	AP-2 complex subunit alpha-2 isoform X2 [Canis lupus familiaris]	10	7	3	103.8	7.44	-	-	0	-	-	0	-	-	0	ID only	ID only	1	-	-	0	49700	76000	0.7	2	N	Y	N	N
XP_853723	AP2B1	AP-2 complex subunit beta isoform X1 [Canis lupus familiaris]	9	7	2	105.6	5.34	-	-	0	-	-	0	-	-	0	3290000	1490000	2.2	-	-	0	45400	92300	0.5	2	N	Y	N	N
NP_001274033	AP2M1	AP-2 complex subunit mu [Canis lupus familiaris]	8	2	2	49.6	9.54	-	-	0	ID only	9680	0.5	-	-	0	-	-	0	-	-	0	537000	201000	2.7	2	N	Y	N	N
XP_533634	AP2S1	AP-2 complex subunit sigma [Canis lupus familiaris]	11	2	2	17	6.18	-	-	0	-	-	0	-	-	0	-	-	0	-	-	0	710000	247000	2.9	1	N	Y	N	N
NP_001002974	AP3B1	AP-3 complex subunit beta-1 [Canis lupus familiaris]	1	1	1	121.1	5.76	-	-	0	-	-	0	-	-	0	-	-	0	ID only	ID only	1	35200	62100	0.6	1	N	Y	N	N
XP_005633160	AP3D1	AP-3 complex subunit delta-1 isoform X1 [Canis lupus familiaris]	1	1	1	137	6.98	ID only	ID only	1	-	-	0	-	-	0	-	-	0	-	-	0	-	-	0	1	N	Y	N	N
XP_005619116	AP3M1	AP-3 complex subunit mu-1 isoform X1 [Canis lupus familiaris]	5	2	2	46.9	6.93	-	-	0	-	-	0	ID only	ID only	1	-	-	0	2280000	2250000	1	-	-	0	2	N	Y	N	N
XP_858735	LOC607494; AP3S1	AP-3 complex subunit sigma-1 isoform X1 [Canis lupus familiaris]	8	2	2	21.7	5.39	-	-	0	-	-	0	-	-	0	54400	27800	2	-	-	0	ID only	ID only	1	2	N	Y	N	N
XP_013968873	APOA1	apolipoprotein A-I [Canis lupus familiaris]	36	11	11	30.2	5.39	2630000	630000	4.2	-	-	0	8870000	3070000	2.9	1430000	482000	3	35800000	15300000	2.3	1100000	616000	1.8	3	Y	Y	Y	Y
NP_001003369	APOC3	apolipoprotein C-III precursor [Canis lupus familiaris]	17	1	1	11	5.38	-	-	0	ID only	ID only	1	-	-	0	-	-	0	-	-	0	ID only	ID only	1	2	N	Y	N	Y
XP_533644	APOE	apolipoprotein E [Canis lupus familiaris]	6	2	2	37.2	5.3	ID only	ID only	1	ID only	ID only	1	ID only	ID only	1	78100	32100	2.4	ID only	ID only	1	ID only	ID only	1	3	N	Y	N	N
NP_001003011	BAX	apoptosis regulator BAX [Canis lupus familiaris]	24	4	4	21.3	5.22	259000	38800	6.7	-	-	0	2790000	1280000	2.2	97300	78000	1.2	5210000	1830000	2.8	153000	153000	1	3	Y	Y	N	N
XP_013969836	LOC100856347; PYCARD	apoptosis-associated speck-like protein containing a CARD isoform X1 [Canis lupus familiaris]	6	7	7	21.8	6.23	722000	252000	2.9	-	-	0	3170000	1360000	2.3	ID only	ID only	1	2780000	883000	3.1	ID only	ID only	1	3	Y	Y	N	N
NP_001003130	AQP1	aquaporin-1 [Canis lupus familiaris]	10	2	2	28.8	7.42	-	-	0	-	-	0	-	-	0	1760000	651000	2.7	-	-	0	838000	444000	1.9	2	N	N	N	N
XP_536613	ALOX12; LOC479476	arachidonate 12-lipoxygenase, 12S-type [Canis lupus familiaris]	2	1	1	75.3	6.74	ID only	ID only	1	ID only	ID only	1	-	-	0	-	-	0	647000	448000	1.4	-	-	0	2	N	Y	N	N
XP_022269602	ACAP2	arf-GAP with coiled-coil, ANK repeat and PH domain-containing protein 2 [Canis lupus familiaris]	1	1	1	87	6.76	ID only	ID only	1	-	-	0	103000	ID only	10	-	-	0	-	-	0	37100	64900	0.6	3	N	Y	N	N
XP_005627995	ASAP1	arf-GAP with SH3 domain, ANK repeat and PH domain-containing protein 1 isoform X1 [Canis lupus familiaris]	6	3	3	126	7.64	-	-	0	-	-	0	-	-	0	ID only	ID only	1	-	-	0	299000	186000	1.6	2	N	Y	N	N
XP_853102	RARS	arginine--tRNA ligase, cytoplasmic [Canis lupus familiaris]	2	1	1	75.5	6.89	-	-	0	-	-	0	-	-	0	-	-	0	96200	81700	1.2	-	-	0	1	N	Y	N	N
XP_022271280	ARMCX3	armadillo repeat-containing X-linked protein 3 [Canis lupus familiaris]	4	1	1	42.4	8.46	-	-	0	-	-	0	-	-	0	-	-	0	-	-	0	ID only	ID only	1	1	N	Y	N	N
NP_001041548	ARSA	arylsulfatase A precursor [Canis lupus familiaris]	10	3	3	53.3	5.47	-	-	0	-	-	0	372000	122000	3	-	-	0	961000	142000	6.8	-	-	0	2	Y	Y	N	N
XP_022271897	ARSF	arylsulfatase F isoform X3 [Canis lupus familiaris]	5	1	1	56.8	6.93	-	-	0	-	-	0	-	-	0	-	-	0	-	-	0	ID only	ID only	1	1	N	N	N	N
XP_005628594	ASNS; LOC475240	asparagine synthetase [glutamine-hydrolyzing] [Canis lupus familiaris]	5	2	2	64.4	6.86	-	-	0	-	-	0	-	-	0	-	-	0	ID only	ID only	1	-	-	0	1	N	N	N	N
XP_849060	NARS	asparagine--tRNA ligase, cytoplasmic isoform X1 [Canis lupus familiaris]	11	4	4	64.2	6.38	ID only	ID only	1	-	-	0	ID only	ID only	1	-	-	0	812000	477000	1.7	-	-	0	3	N	Y	N	N
NP_001277045	GOT1	aspartate aminotransferase, cytoplasmic [Canis lupus familiaris]	8	15	15	46.4	7.24	6820000	604000	11.3	-	-	0	13800000	8340000	1.7	115000	29000	4	22800000	16000000	1.4	127000	51400	2.5	3	Y	Y	N	N
NP_001273953	GOT2	aspartate aminotransferase, mitochondrial [Canis lupus familiaris]	7	11	11	47.4	9	983000	824000	1.2	-	-	0	8220000	6730000	1.2	323000	105000	3.1	8830000	8040000	1.1	329000	154000	2.1	3	Y	Y	N	N
XP_848666	DARS	aspartate--tRNA ligase, cytoplasmic isoform X1 [Canis lupus familiaris]	25	12	12	57	6.77	2580000	321000	8.1	98000	44700	2.2	3510000	1060000	3.3	872000	347000	2.5	5300000	3020000	1.8	904000	724000	1.2	3	Y	Y	N	N
XP_022270828	DNPEP	aspartyl aminopeptidase isoform X1 [Canis lupus familiaris]	2	1	1	55.5	7.21	-	-	0	-	-	0	-	-	0	229000	101000	2.3	-	-	0	ID only	ID only	1	2	N	Y	N	N
XP_013963212	ATXN2	ataxin-2 [Canis lupus familiaris]	1	1	1	138.5	9.63	-	-	0	-	-	0	ID only	ID only	1	-	-	0	-	-	0	-	-	0	1	N	Y	N	N
XP_005631631	ATL3	atlastin-3 isoform X1 [Canis lupus familiaris]	4	1	1	60.4	5.73	-	-	0	ID only	ID only	1	-	-	0	ID only	ID only	1	-	-	0	ID only	ID only	1	3	N	Y	N	N
XP_537027	ATP5F1; LOC479901	ATP synthase F(0) complex subunit B1, mitochondrial [Canis lupus familiaris]	24	4	4	28.8	9.35	-	-	0	53800	74800	0.7	-	-	0	316000	198000	1.6	-	-	0	673000	328000	2	3	N	Y	N	N
NP_001274083	ATP5A1	ATP synthase subunit alpha, mitochondrial [Canis lupus familiaris]	35	15	15	59.7	9.19	-	-	0	1070000	1800000	0.6	163000	79100	2.1	11100000	6880000	1.6	918000	891000	1	21100000	13500000	1.6	3	N	Y	N	N
XP_531639	ATP5B	ATP synthase subunit beta, mitochondrial [Canis lupus familiaris]	45	16	16	56.3	5.34	1030000	96300	10.7	1630000	1650000	1	890000	618000	1.4	12300000	10400000	1.2	2920000	2290000	1.3	17400000	12000000	1.5	3	N	Y	N	N
XP_022278200	LOC100683871	ATP synthase subunit d, mitochondrial-like [Canis lupus familiaris]	14	2	2	18.6	5.74	-	-	0	-	-	0	-	-	0	292000	183000	1.6	-	-	0	300000	96300	3.1	2	N	Y	N	N
XP_013977810	ATP5D	ATP synthase subunit delta, mitochondrial [Canis lupus familiaris]	12	1	1	17.5	5.25	-	-	0	-	-	0	-	-	0	-	-	0	-	-	0	184000	125000	1.5	1	N	Y	N	N
XP_005617216	ATP5C1	ATP synthase subunit gamma, mitochondrial isoform X1 [Canis lupus familiaris]	22	4	4	33	9.14	-	-	0	-	-	0	-	-	0	859000	357000	2.4	-	-	0	1080000	592000	1.8	2	N	Y	N	N
XP_005638919	ATP5O; LOC100855541	ATP synthase subunit O, mitochondrial [Canis lupus familiaris]	12	2	2	23.5	10.04	-	-	0	-	-	0	-	-	0	81700	83800	1	-	-	0	801000	331000	2.4	2	N	Y	N	N
XP_005640740	ATG9A; ABCB6	ATP-binding cassette sub-family B member 6, mitochondrial [Canis lupus familiaris]	2	1	1	93.6	7.43	-	-	0	-	-	0	-	-	0	ID only	ID only	1	-	-	0	-	-	0	1	N	Y	N	N
XP_867212	ABCE1	ATP-binding cassette sub-family E member 1 [Canis lupus familiaris]	5	2	2	67.3	8.34	-	-	0	-	-	0	369000	109000	3.4	-	-	0	513000	332000	1.5	-	-	0	2	N	Y	N	N
XP_013972035	ACLY	ATP-citrate synthase isoform X4 [Canis lupus familiaris]	5	5	5	126	8.07	115000	215000	0.5	280000	45400	6.2	4650000	1550000	3	725000	293000	2.5	2120000	1830000	1.2	848000	457000	1.9	3	Y	Y	N	N
XP_013961934	CARKD; LOC607381; NAXD	ATP-dependent (S)-NAD(P)H-hydrate dehydratase [Canis lupus familiaris]	6	4	4	24.8	6.52	497000	159000	3.1	-	-	0	825000	502000	1.6	ID only	ID only	1	2350000	1390000	1.7	69400	15200	4.6	3	N	Y	N	N
XP_544922	PFKL	ATP-dependent 6-phosphofructokinase, liver type isoform X1 [Canis lupus familiaris]	21	14	14	85.2	7.34	2770000	2120000	1.3	2050000	397000	5.1	10000000	5690000	1.8	4460000	2460000	1.8	16700000	11000000	1.5	5650000	3540000	1.6	3	N	Y	N	N
XP_005617240	PFKP	ATP-dependent 6-phosphofructokinase, platelet type isoform X1 [Canis lupus familiaris]	28	18	17	88	6.73	3090000	2110000	1.5	4530000	738000	6.1	29700000	17900000	1.7	10900000	5620000	1.9	41600000	29600000	1.4	14300000	7730000	1.8	3	N	Y	N	N
XP_848865	DDX1	ATP-dependent RNA helicase DDX1 isoform X1 [Canis lupus familiaris]	5	2	2	82.4	7.23	-	-	0	-	-	0	-	-	0	-	-	0	-	-	0	ID only	ID only	1	1	N	Y	N	N
XP_861958	DDX19B; LOC479657	ATP-dependent RNA helicase DDX19B isoform X1 [Canis lupus familiaris]	3	1	1	57.8	6.49	ID only	ID only	1	-	-	0	-	-	0	-	-	0	-	-	0	-	-	0	1	N	Y	N	N
XP_005641311	DDX3X	ATP-dependent RNA helicase DDX3X isoform X1 [Canis lupus familiaris]	3	2	2	73.4	7.06	-	-	0	-	-	0	-	-	0	220000	59600	3.7	-	-	0	623000	235000	2.6	2	Y	Y	N	N
XP_533904	ASNA1	ATPase ASNA1 [Canis lupus familiaris]	7	2	2	38.8	4.91	-	-	0	-	-	0	111000	34300	3.2	-	-	0	ID only	ID only	1	-	-	0	2	N	Y	N	N
XP_022279028	ATAD5	ATPase family AAA domain-containing protein 5 isoform X1 [Canis lupus familiaris]	1	1	1	213.6	9.2	-	-	0	-	-	0	934000	ID only	10	-	-	0	-	-	0	-	-	0	1	N	N	N	N
XP_022282124	ATG5	autophagy protein 5 isoform X1 [Canis lupus familiaris]	5	1	1	32.4	5.91	ID only	ID only	1	-	-	0	-	-	0	-	-	0	-	-	0	-	-	0	1	N	Y	N	N
XP_013971619	ATG2B	autophagy-related protein 2 homolog B isoform X1 [Canis lupus familiaris]	1	1	1	234.2	5.73	9050000	1270000	7.1	-	-	0	14400000	1620000	8.9	1190000	277000	4.3	-	-	0	-	-	0	2	Y	Y	N	N
XP_538200	BCAP31	B-cell receptor-associated protein 31 [Canis lupus familiaris]	6	2	2	28	8.02	-	-	0	ID only	16900	0.5	-	-	0	468000	255000	1.8	-	-	0	372000	201000	1.9	3	N	Y	N	N
NP_001041496	SLC4A1	band 3 anion transport protein [Canis lupus familiaris]	23	18	18	104.1	5.24	-	-	0	397000	246000	1.6	ID only	ID only	1	58000000	32300000	1.8	-	-	0	24100000	12400000	1.9	3	N	Y	N	N
XP_854776	BANF1	barrier-to-autointegration factor [Canis lupus familiaris]	43	3	3	10.1	6.09	1740000	171000	10.2	-	-	0	1420000	733000	1.9	-	-	0	2000000	1300000	1.5	-	-	0	3	N	Y	N	N
XP_849107	BZW1	basic leucine zipper and W2 domain-containing protein 1 isoform X1 [Canis lupus familiaris]	35	9	9	51.2	6.95	2350000	78300	30	ID only	6820	0.5	2010000	364000	5.5	-	-	0	3570000	1430000	2.5	-	-	0	3	Y	Y	N	N
XP_005628641	LOC100856737; BZW2	basic leucine zipper and W2 domain-containing protein 2 isoform X1 [Canis lupus familiaris]	5	1	1	48.1	6.68	-	-	0	-	-	0	-	-	0	-	-	0	ID only	ID only	1	-	-	0	1	N	Y	N	N
XP_533964	BSG	basigin isoform X2 [Canis lupus familiaris]	35	9	9	29.3	5.78	-	-	0	1200000	558000	2.1	-	-	0	3360000	1740000	1.9	-	-	0	8690000	4720000	1.8	3	N	Y	N	N
XP_543143	B3GALTL; B3GLCT	beta-1,3-glucosyltransferase [Canis lupus familiaris]	3	1	1	62.6	9	-	-	0	-	-	0	ID only	ID only	1	-	-	0	-	-	0	-	-	0	1	N	Y	N	N
XP_538701	B4GALT1	beta-1,4-galactosyltransferase 1 [Canis lupus familiaris]	16	4	4	44.3	8.54	ID only	ID only	1	-	-	0	237000	ID only	10	-	-	0	533000	ID only	10	-	-	0	3	Y	Y	N	N
XP_533222	B3GNT1; B4GAT1	beta-1,4-glucuronyltransferase 1 [Canis lupus familiaris]	4	1	1	47.1	7.03	284000	ID only	10	-	-	0	162000	ID only	10	-	-	0	490000	ID only	10	-	-	0	3	Y	N	N	N
NP_001003265	APOH	beta-2-glycoprotein 1 precursor [Canis lupus familiaris]	6	10	10	38.4	8.13	5550000	128000	43.4	-	-	0	10700000	237000	45.1	ID only	ID only	1	14900000	847000	17.6	ID only	ID only	1	3	Y	Y	Y	Y
XP_003640095	B2M	beta-2-microglobulin isoform X1 [Canis lupus familiaris]	10	7	7	14.3	6.37	54900000	2750000	19.9	467000	120000	3.9	10100000	2360000	4.3	804000	441000	1.8	67100000	12000000	5.6	925000	414000	2.2	3	Y	Y	Y	N
XP_544346	ACTBL2	beta-actin-like protein 2 [Canis lupus familiaris]	49	21	9	41.9	5.48	31800000	4570000	7	1620000	595000	2.7	20800000	7160000	2.9	23700000	14900000	1.6	31900000	26700000	1.2	4690000	3880000	1.2	3	Y	Y	N	Y
XP_852085	ADRBK1; GRK2	beta-adrenergic receptor kinase 1 isoform X2 [Canis lupus familiaris]	2	1	1	79.6	7.4	-	-	0	-	-	0	-	-	0	ID only	ID only	1	-	-	0	-	-	0	1	N	Y	N	N
XP_022263390	ARRB1	beta-arrestin-1 isoform X2 [Canis lupus familiaris]	55	18	18	47.3	6.2	20800000	3370000	6.2	-	-	0	12800000	4710000	2.7	-	-	0	24400000	15000000	1.6	-	-	0	3	Y	Y	N	N
XP_022263394	ARRB1	beta-arrestin-1 isoform X7 [Canis lupus familiaris]	33	8	8	48.9	5.54	-	-	0	243000	109000	2.2	-	-	0	3720000	1220000	3	-	-	0	3010000	1160000	2.6	3	Y	Y	N	N
XP_854473	ACTR1B	beta-centractin isoform X1 [Canis lupus familiaris]	17	3	1	42.3	6.4	-	-	0	ID only	ID only	1	-	-	0	360000	263000	1.4	-	-	0	260000	161000	1.6	3	N	Y	N	N
XP_536606	ENO3	beta-enolase isoform X1 [Canis lupus familiaris]	30	7	1	47.8	8.16	-	-	0	-	-	0	ID only	ID only	1	-	-	0	ID only	ID only	1	-	-	0	2	N	Y	N	N
NP_001032730	GLB1	beta-galactosidase precursor [Canis lupus familiaris]	6	2	2	74.9	7.31	-	-	0	-	-	0	226000	ID only	10	-	-	0	ID only	ID only	1	-	-	0	2	N	Y	Y	N
XP_013966443	GLB1L	beta-galactosidase-1-like protein [Canis lupus familiaris]	7	3	3	73.7	7.44	-	-	0	-	-	0	377000	ID only	10	-	-	0	926000	48700	19	-	-	0	2	Y	Y	N	N
XP_005639870	ST6GAL1	beta-galactoside alpha-2,6-sialyltransferase 1 isoform X1 [Canis lupus familiaris]	3	1	1	45.7	8.9	157000	1800000	0.1	-	-	0	-	-	0	-	-	0	-	-	0	-	-	0	1	N	Y	N	N
NP_001003191	GUSB	beta-glucuronidase precursor [Canis lupus familiaris]	7	12	12	74.4	6.57	ID only	ID only	1	ID only	ID only	1	4120000	293000	14.1	358000	ID only	10	9000000	468000	19.2	665000	ID only	10	3	Y	Y	N	N
XP_544758	HEXA	beta-hexosaminidase subunit alpha isoform X1 [Canis lupus familiaris]	11	4	4	60.5	5.77	-	-	0	-	-	0	1360000	53200	25.5	-	-	0	2320000	162000	14.4	-	-	0	2	Y	Y	N	N
XP_022270477	HEXB	beta-hexosaminidase subunit beta [Canis lupus familiaris]	2	9	9	60.5	6.61	44700	ID only	10	-	-	0	2010000	150000	13.4	66000	ID only	10	9690000	580000	16.7	141000	44000	3.2	3	Y	Y	N	N
XP_005639293	MANBA	beta-mannosidase [Canis lupus familiaris]	7	4	4	101.7	6.98	-	-	0	-	-	0	-	-	0	-	-	0	1250000	ID only	10	-	-	0	1	N	N	N	N
XP_022280035	PARVB	beta-parvin isoform X1 [Canis lupus familiaris]	44	19	19	40.5	5.86	83200000	29100000	2.9	30700000	7620000	4	117000000	62100000	1.9	56200000	27700000	2	279000000	147000000	1.9	64000000	47500000	1.3	3	Y	Y	Y	N
XP_022280036	PARVB	beta-parvin isoform X2 [Canis lupus familiaris]	45	14	1	35.7	5.76	-	-	0	-	-	0	-	-	0	-	-	0	-	-	0	ID only	ID only	1	1	N	Y	N	N
NP_001238867	BID	BH3-interacting domain death agonist [Canis lupus familiaris]	7	4	4	22.4	4.94	ID only	ID only	1	-	-	0	2450000	1010000	2.4	ID only	ID only	1	4690000	1240000	3.8	146000	160000	0.9	3	Y	Y	N	N
XP_005635733	EPHX2	bifunctional epoxide hydrolase 2 [Canis lupus familiaris]	3	1	1	61.9	6.47	-	-	0	-	-	0	ID only	ID only	1	-	-	0	-	-	0	-	-	0	1	N	Y	N	N
XP_545634	ATIC	bifunctional purine biosynthesis protein PURH [Canis lupus familiaris]	9	23	23	64.7	6.67	6680000	4030000	1.7	-	-	0	41600000	24700000	1.7	471000	291000	1.6	49600000	32900000	1.5	392000	168000	2.3	3	N	Y	N	N
XP_005634448	BTD	biotinidase isoform X1 [Canis lupus familiaris]	2	1	1	59.5	6.04	-	-	0	-	-	0	ID only	ID only	1	-	-	0	-	-	0	-	-	0	1	N	Y	N	N
XP_013973961	ENPP4	bis(5'-adenosyl)-triphosphatase ENPP4 [Canis lupus familiaris]	5	2	2	51.5	5.97	-	-	0	-	-	0	-	-	0	-	-	0	939000	ID only	10	-	-	0	1	N	Y	N	N
XP_005632353	FHIT	bis(5'-adenosyl)-triphosphatase isoform X1 [Canis lupus familiaris]	20	2	2	20	6.52	-	-	0	-	-	0	78000	ID only	10	-	-	0	217000	57600	3.8	-	-	0	2	Y	Y	N	N
XP_531977	NUDT2	bis(5'-nucleosyl)-tetraphosphatase [asymmetrical] [Canis lupus familiaris]	10	1	1	16.8	5.54	-	-	0	-	-	0	158000	63000	2.5	-	-	0	190000	72000	2.6	-	-	0	2	Y	Y	N	N
XP_022259505	BPGM	bisphosphoglycerate mutase [Canis lupus familiaris]	4	6	6	30	6.39	-	-	0	-	-	0	7230000	2780000	2.6	-	-	0	396000	269000	1.5	-	-	0	2	N	Y	N	N
XP_537755	BLMH	bleomycin hydrolase [Canis lupus familiaris]	4	14	14	52.4	6.48	13300000	3950000	3.4	677000	134000	5	7250000	4170000	1.7	852000	413000	2.1	13800000	9670000	1.4	ID only	ID only	1	3	Y	Y	N	N
XP_022275604	LOC607859; BOLA2B	bolA-like protein 2 isoform X1 [Canis lupus familiaris]	12	1	1	14.9	10.96	2100000	744000	2.8	-	-	0	1180000	352000	3.4	-	-	0	1790000	729000	2.4	-	-	0	3	Y	Y	N	N
XP_541509	BCAT2	branched-chain-amino-acid aminotransferase, mitochondrial isoform X1 [Canis lupus familiaris]	7	2	2	44.5	7.47	-	-	0	-	-	0	263000	219000	1.2	-	-	0	766000	648000	1.2	-	-	0	2	N	Y	N	N
XP_022267441	BCCIP	BRCA2 and CDKN1A-interacting protein isoform X1 [Canis lupus familiaris]	3	1	1	43.4	7.11	-	-	0	-	-	0	-	-	0	-	-	0	ID only	ID only	1	-	-	0	1	N	N	N	N
XP_013963680	BCR	breakpoint cluster region protein [Canis lupus familiaris]	2	2	2	145.3	7.64	-	-	0	-	-	0	-	-	0	193000	114000	1.7	ID only	ID only	1	514000	272000	1.9	2	N	Y	N	N
XP_005636868	BIN2	bridging integrator 2 isoform X1 [Canis lupus familiaris]	50	27	27	61.3	5.06	20200000	10400000	1.9	1190000	554000	2.1	55000000	21900000	2.5	9010000	8690000	1	122000000	71300000	1.7	15100000	13700000	1.1	3	N	Y	Y	Y
XP_535051	FAM175B; ABRAXAS2	BRISC complex subunit Abraxas 2 [Canis lupus familiaris]	3	1	1	49.4	6.76	-	-	0	-	-	0	ID only	ID only	1	191000	ID only	10	277000	85300	3.2	138000	ID only	10	2	Y	Y	N	N
XP_005640896	BROX	BRO1 domain-containing protein BROX [Canis lupus familiaris]	27	6	6	46.2	8.02	893000	85700	10.4	-	-	0	623000	164000	3.8	-	-	0	2940000	1530000	1.9	-	-	0	3	Y	Y	N	N
XP_867048	BRDT	bromodomain testis-specific protein [Canis lupus familiaris]	2	1	1	105.9	9.22	-	-	0	-	-	0	ID only	ID only	1	-	-	0	-	-	0	-	-	0	1	N	N	N	N
XP_537476	MTHFD1	C-1-tetrahydrofolate synthase, cytoplasmic isoform X2 [Canis lupus familiaris]	18	17	17	101.2	6.83	3100000	1860000	1.7	905000	284000	3.2	17500000	9440000	1.9	3660000	2850000	1.3	26200000	18500000	1.4	5550000	4790000	1.2	3	N	Y	N	N
XP_541904	CCRL2; LOC484788	C-C chemokine receptor-like 2 [Canis lupus familiaris]	5	1	1	40.3	8.18	-	-	0	-	-	0	-	-	0	53200	27900	1.9	-	-	0	44700	21700	2.1	2	N	N	N	N
XP_537723	CCL14; LOC480603	C-C motif chemokine 14 [Canis lupus familiaris]	42	11	11	15.3	9.31	998000000	94800000	10.5	184000000	7350000	25.1	1250000000	210000000	6	273000000	31800000	8.6	1320000000	310000000	4.3	269000000	21700000	12.4	3	Y	N	N	N
XP_537722	CCL23	C-C motif chemokine 23 isoform X1 [Canis lupus familiaris]	13	2	2	13.5	8.28	462000	7900	58.4	-	-	0	412000	ID only	10	101000	ID only	10	300000	ID only	10	-	-	0	3	Y	N	N	N
XP_022274848	CMIP	C-Maf-inducing protein isoform X2 [Canis lupus familiaris]	3	1	1	76.6	6.44	-	-	0	-	-	0	-	-	0	-	-	0	-	-	0	ID only	ID only	1	1	N	Y	N	N
XP_022266732	CLEC9A; CLEC1B	C-type lectin domain family 1 member B isoform X1 [Canis lupus familiaris]	3	1	1	54.1	8	-	-	0	-	-	0	-	-	0	-	-	0	-	-	0	ID only	ID only	1	1	N	Y	N	N
XP_022266733	CLEC9A; CLEC1B	C-type lectin domain family 1 member B isoform X2 [Canis lupus familiaris]	3	1	1	31.5	8.53	-	-	0	-	-	0	-	-	0	187000	76500	2.4	-	-	0	-	-	0	1	N	Y	N	N
XP_854623	CLEC11A	C-type lectin domain family 11 member A [Canis lupus familiaris]	4	1	1	35.7	5.16	-	-	0	-	-	0	-	-	0	ID only	ID only	1	-	-	0	-	-	0	1	N	Y	Y	N
XP_003434998	C4BPA	C4b-binding protein alpha chain [Canis lupus familiaris]	12	4	4	68.5	7.55	-	-	0	37200	24200	1.5	-	-	0	ID only	ID only	1	-	-	0	505000	437000	1.2	3	N	Y	Y	N
XP_005630306	CAD	CAD protein isoform X1 [Canis lupus familiaris]	4	6	6	245	6.62	-	-	0	185000	65300	2.8	ID only	ID only	1	1270000	888000	1.4	ID only	133000	0.5	1130000	754000	1.5	3	N	Y	N	N
XP_849876	CIB1	calcium and integrin-binding protein 1 isoform X1 [Canis lupus familiaris]	5	2	2	21.8	4.78	-	-	0	-	-	0	-	-	0	246000	151000	1.6	-	-	0	347000	181000	1.9	2	N	Y	N	N
XP_546160	MCU	calcium uniporter protein, mitochondrial isoform X1 [Canis lupus familiaris]	3	1	1	39.9	8.65	-	-	0	-	-	0	-	-	0	118000	75000	1.6	-	-	0	188000	101000	1.9	2	N	Y	N	N
XP_013970270	SLC25A24; LOC611922	calcium-binding mitochondrial carrier protein SCaMC-1 [Canis lupus familiaris]	6	2	2	46.5	9	-	-	0	ID only	26700	0.5	-	-	0	284000	200000	1.4	-	-	0	565000	456000	1.2	3	N	Y	N	N
XP_005633045	LOC100855874; SLC25A23	calcium-binding mitochondrial carrier protein SCaMC-3 isoform X1 [Canis lupus familiaris]	3	1	1	67.3	8.15	-	-	0	223000	138000	1.6	-	-	0	560000	361000	1.6	-	-	0	698000	484000	1.4	3	N	Y	N	N
XP_534599	CAB39	calcium-binding protein 39 [Canis lupus familiaris]	26	8	8	39.8	6.89	4980000	1570000	3.2	-	-	0	5880000	3020000	1.9	-	-	0	10000000	4400000	2.3	-	-	0	3	Y	Y	N	N
XP_542560	CAB39L	calcium-binding protein 39-like [Canis lupus familiaris]	6	9	9	39	8.4	5630000	1020000	5.5	-	-	0	4940000	1810000	2.7	110000	18200	6	19000000	8080000	2.3	525000	292000	1.8	3	Y	Y	N	N
XP_022264329	ATP2C1	calcium-transporting ATPase type 2C member 1 isoform X1 [Canis lupus familiaris]	3	2	2	107.8	6.27	-	-	0	ID only	ID only	1	-	-	0	ID only	ID only	1	-	-	0	106000	96500	1.1	3	N	Y	N	N
XP_541780	CAMK1	calcium/calmodulin-dependent protein kinase type 1 [Canis lupus familiaris]	24	6	6	41.1	5.43	678000	123000	5.5	-	-	0	483000	170000	2.8	-	-	0	2710000	1290000	2.1	-	-	0	3	Y	Y	N	N
XP_005639344	CAMK2D	calcium/calmodulin-dependent protein kinase type II subunit delta isoform X2 [Canis lupus familiaris]	2	1	1	61.2	7.71	-	-	0	-	-	0	-	-	0	85600	72800	1.2	-	-	0	-	-	0	1	N	Y	N	N
XP_537183	CACYBP	calcyclin-binding protein isoform X1 [Canis lupus familiaris]	33	5	5	26.4	8.25	-	-	0	-	-	0	940000	205000	4.6	-	-	0	3370000	1360000	2.5	-	-	0	2	Y	Y	N	N
XP_022259501	LOC608135; CALD1	caldesmon isoform X1 [Canis lupus familiaris]	23	18	18	85.9	5.62	8840000	6050000	1.5	1070000	313000	3.4	16500000	8650000	1.9	6690000	7710000	0.9	32200000	23300000	1.4	7890000	6380000	1.2	3	N	Y	Y	N
XP_537537	CALM3; CALM2; CALM1	calmodulin-1 [Canis lupus familiaris]	36	6	6	16.8	4.22	5090000	1670000	3	-	-	0	37800000	39700000	1	2950000	2020000	1.5	62100000	54100000	1.1	2590000	4490000	0.6	3	N	Y	Y	N
NP_001003232	CANX	calnexin precursor [Canis lupus familiaris]	20	6	6	67.6	4.61	-	-	0	129000	87600	1.5	-	-	0	600000	486000	1.2	-	-	0	2430000	1050000	2.3	3	N	Y	N	N
XP_853634	CAPNS1	calpain small subunit 1 isoform X1 [Canis lupus familiaris]	29	7	7	28.4	5.44	-	-	0	62200	85700	0.7	1460000	546000	2.7	164000	69800	2.3	3040000	987000	3.1	1770000	667000	2.7	3	Y	Y	N	N
XP_540866	CAPN1	calpain-1 catalytic subunit [Canis lupus familiaris]	26	21	21	81.3	5.59	2770000	1380000	2	3170000	856000	3.7	13400000	4580000	2.9	12000000	4650000	2.6	14700000	9450000	1.6	7010000	2620000	2.7	3	Y	Y	N	N
XP_022263358	CAPN5	calpain-5 isoform X1 [Canis lupus familiaris]	25	9	9	73.1	7.59	-	-	0	151000	94000	1.6	-	-	0	753000	405000	1.9	-	-	0	2150000	730000	2.9	3	N	Y	N	N
XP_854646	CNN2	calponin-2 [Canis lupus familiaris]	50	9	9	33.4	7.37	46500	61700	0.8	325000	89000	3.7	4340000	1100000	3.9	2070000	1080000	1.9	13300000	4120000	3.2	3810000	2250000	1.7	3	Y	Y	N	N
XP_867310	CALR	calreticulin [Canis lupus familiaris]	28	21	21	48.2	4.46	57000000	9000000	6.3	56400	28400	2	79200000	52600000	1.5	481000	275000	1.7	98300000	73800000	1.3	1820000	1090000	1.7	3	N	Y	Y	N
XP_013969391	CLSTN1; LOC479600	calsyntenin-1 isoform X1 [Canis lupus familiaris]	9	6	6	113.4	4.87	-	-	0	440000	12400	35.6	-	-	0	-	-	0	-	-	0	2100000	62900	33.3	2	Y	Y	Y	N
XP_013969392	CLSTN1; LOC479600	calsyntenin-1 isoform X2 [Canis lupus familiaris]	13	13	13	112.2	4.89	2980000	141000	21.1	-	-	0	8840000	451000	19.6	3060000	145000	21.1	14200000	1390000	10.2	-	-	0	3	Y	Y	N	N
XP_849335	CALU	calumenin isoform X1 [Canis lupus familiaris]	18	6	6	37.1	4.63	960000	9070	105.8	-	-	0	1310000	102000	12.9	ID only	ID only	1	1610000	285000	5.6	-	-	0	3	Y	Y	Y	N
NP_001003032	PRKACA	cAMP-dependent protein kinase catalytic subunit alpha [Canis lupus familiaris]	7	3	2	40.5	8.72	ID only	ID only	1	ID only	ID only	1	201000	ID only	10	-	-	0	767000	239000	3.2	220000	111000	2	3	Y	Y	N	N
XP_537099	PRKACB; LOC479975	cAMP-dependent protein kinase catalytic subunit beta isoform X1 [Canis lupus familiaris]	18	5	4	46.1	8.6	1050000	14400	72.5	115000	36500	3.2	1140000	64600	17.6	1680000	520000	3.2	2700000	1060000	2.5	1370000	759000	1.8	3	Y	Y	N	N
XP_013971909	PRKAR1A	cAMP-dependent protein kinase type I-alpha regulatory subunit [Canis lupus familiaris]	3	3	3	43	5.35	-	-	0	-	-	0	-	-	0	-	-	0	66000	30800	2.1	ID only	ID only	1	1	N	Y	N	N
XP_013976258	PRKAR2B	cAMP-dependent protein kinase type II-beta regulatory subunit isoform X1 [Canis lupus familiaris]	46	12	12	48.3	4.92	-	-	0	-	-	0	3170000	208000	15.2	1870000	292000	6.4	6560000	2150000	3	2110000	1040000	2	2	Y	Y	N	N
XP_858066	PRKAR2B	cAMP-dependent protein kinase type II-beta regulatory subunit isoform X2 [Canis lupus familiaris]	23	13	13	46.2	4.91	4360000	273000	15.9	320000	77400	4.1	-	-	0	-	-	0	-	-	0	-	-	0	1	N	Y	N	N
NP_001003081	ABCC2	canalicular multispecific organic anion transporter 1 [Canis lupus familiaris]	2	1	1	169.2	8.69	-	-	0	-	-	0	-	-	0	-	-	0	ID only	ID only	1	-	-	0	1	N	N	N	N
NP_001138643	CA1	carbonic anhydrase 1 [Canis lupus familiaris]	56	14	14	29	7.12	1740000	877000	2	-	-	0	182000000	71900000	2.5	1250000	780000	1.6	32700000	19700000	1.7	-	-	0	3	Y	Y	N	N
XP_013964802	CA13	carbonic anhydrase 13 [Canis lupus familiaris]	26	5	5	29.4	6.86	-	-	0	-	-	0	-	-	0	-	-	0	3550000	1530000	2.3	-	-	0	1	N	Y	N	N
NP_001138642	CA2	carbonic anhydrase 2 [Canis lupus familiaris]	9	15	15	29.2	7.18	11600000	4670000	2.5	62700	ID only	10	162000000	76500000	2.1	737000	234000	3.2	81700000	53300000	1.5	633000	360000	1.8	3	Y	Y	Y	N
XP_852675	CBR1; LOC610164	carbonyl reductase [NADPH] 1 [Canis lupus familiaris]	9	12	12	30.6	7.77	1650000	348000	4.8	-	-	0	8810000	5100000	1.7	-	-	0	12200000	7980000	1.5	506000	342000	1.5	3	N	Y	N	N
XP_544873	CBR3	carbonyl reductase [NADPH] 3 [Canis lupus familiaris]	8	2	2	30.7	5.94	-	-	0	112000	17900	6.3	-	-	0	286000	133000	2.2	-	-	0	-	-	0	2	Y	Y	N	N
XP_851154	CPB2	carboxypeptidase B2 [Canis lupus familiaris]	4	2	2	49.1	7.78	197000	ID only	10	-	-	0	ID only	ID only	1	-	-	0	-	-	0	-	-	0	2	N	Y	N	N
XP_022259139	CEACAM21; LOC491477	carcinoembryonic antigen-related cell adhesion molecule 21 [Canis lupus familiaris]	8	7	7	35.8	5.73	29200000	2860000	10.2	268000	11400	23.4	23900000	5250000	4.6	426000	68600	6.2	44800000	7330000	6.1	928000	79900	11.6	3	Y	N	N	N
XP_546705	CPT2	carnitine O-palmitoyltransferase 2, mitochondrial isoform X1 [Canis lupus familiaris]	7	2	2	74	8.47	-	-	0	-	-	0	-	-	0	ID only	ID only	1	ID only	ID only	1	ID only	ID only	1	2	N	Y	N	N
XP_013962797	CASS4	cas scaffolding protein family member 4 [Canis lupus familiaris]	2	1	1	89.2	7.69	ID only	ID only	1	-	-	0	ID only	ID only	1	-	-	0	145000	21900	6.6	-	-	0	3	N	Y	N	N
XP_013973795	CSNK2B	casein kinase II subunit beta isoform X1 [Canis lupus familiaris]	5	1	1	27	5.96	-	-	0	-	-	0	83500	ID only	10	100000	ID only	10	142000	ID only	10	94000	ID only	10	2	Y	Y	N	N
XP_542720	LOC485601	caspase-14-like [Canis lupus familiaris]	2	1	1	42.1	6.79	-	-	0	-	-	0	-	-	0	166000	54400	3	-	-	0	258000	174000	1.5	2	N	N	N	N
NP_001003042	CASP3	caspase-3 [Canis lupus familiaris]	39	8	7	31.3	6.52	ID only	ID only	1	-	-	0	2250000	1030000	2.2	-	-	0	4090000	2720000	1.5	-	-	0	3	N	Y	N	N
XP_545022	CASP6	caspase-6 [Canis lupus familiaris]	28	9	8	33.4	6.6	1810000	546000	3.3	-	-	0	4720000	2030000	2.3	-	-	0	12000000	5770000	2.1	-	-	0	3	Y	Y	N	N
XP_005637795	CASP7	caspase-7 isoform X1 [Canis lupus familiaris]	8	1	1	33.8	6.19	-	-	0	-	-	0	137000	44500	3.1	-	-	0	404000	209000	1.9	-	-	0	2	N	N	N	N
NP_001002984	CAT	catalase [Canis lupus familiaris]	31	14	14	59.8	7.34	611000	818000	0.7	425000	151000	2.8	13500000	10100000	1.3	9380000	5880000	1.6	18100000	16800000	1.1	7750000	4670000	1.7	3	N	Y	Y	N
XP_543203	CTSB	cathepsin B isoform X1 [Canis lupus familiaris]	14	3	3	37.7	6.07	354000	8130	43.6	-	-	0	1020000	184000	5.5	-	-	0	2280000	145000	15.8	-	-	0	3	Y	Y	N	N
NP_001020792	CTSD	cathepsin D precursor [Canis lupus familiaris]	4	4	4	44.3	7.83	ID only	ID only	1	-	-	0	1570000	ID only	10	-	-	0	4610000	289000	16	ID only	ID only	1	3	Y	Y	Y	N
XP_005615838	LOC102156614; CTSV; CTSL2; CTSL	cathepsin L1 [Canis lupus familiaris]	15	6	6	37.4	7.09	ID only	ID only	1	-	-	0	3870000	376000	10.3	377000	42400	8.9	8600000	487000	17.7	709000	201000	3.5	3	Y	N	N	N
XP_005635417	CTSZ	cathepsin Z [Canis lupus familiaris]	25	4	4	22.7	5.22	-	-	0	-	-	0	204000	30700	6.6	-	-	0	7700000	464000	16.6	-	-	0	2	Y	N	N	N
XP_005637236	M6PR	cation-dependent mannose-6-phosphate receptor [Canis lupus familiaris]	23	5	5	31.2	5.87	-	-	0	947000	274000	3.5	-	-	0	3890000	3020000	1.3	-	-	0	3510000	2920000	1.2	3	N	Y	N	N
XP_022281964	CD109	CD109 antigen isoform X1 [Canis lupus familiaris]	17	26	26	162.1	5.74	1480000	1210000	1.2	347000	90500	3.8	15600000	11000000	1.4	3480000	1610000	2.2	29300000	19900000	1.5	4310000	1830000	2.4	3	Y	Y	N	N
XP_533198	CD151	CD151 antigen [Canis lupus familiaris]	12	2	2	28	7.68	-	-	0	-	-	0	-	-	0	-	-	0	-	-	0	180000	82800	2.2	1	N	Y	N	N
XP_022281043	CD177; LOC612424	CD177 antigen [Canis lupus familiaris]	3	1	1	43.8	6.81	-	-	0	-	-	0	ID only	ID only	1	66700	45300	1.5	125000	43800	2.9	ID only	ID only	1	2	N	N	N	N
NP_001122310	CD1A8	CD1a8 protein precursor [Canis lupus familiaris]	6	1	1	37.3	6.8	-	-	0	-	-	0	-	-	0	3580000	3170000	1.1	-	-	0	-	-	0	1	N	N	N	N
XP_005615388	CD226	CD226 antigen isoform X1 [Canis lupus familiaris]	20	4	4	40	7.9	-	-	0	99400	60300	1.6	-	-	0	272000	145000	1.9	-	-	0	1190000	726000	1.6	3	N	Y	N	N
NP_001002981	CD40LG	CD40 ligand [Canis lupus familiaris]	7	2	2	28.7	8.51	-	-	0	-	-	0	1090000	214000	5.1	ID only	ID only	1	1730000	188000	9.2	350000	124000	2.8	2	Y	Y	N	N
XP_005631087	CD44	CD44 antigen isoform X1 [Canis lupus familiaris]	9	5	5	85.7	5.45	6970000	485000	14.4	804000	798000	1	30300000	11100000	2.7	8590000	5500000	1.6	25600000	11400000	2.3	10500000	5820000	1.8	3	Y	Y	N	N
NP_001295463	CD5L	CD5 antigen-like precursor [Canis lupus familiaris]	31	9	9	37.6	5.58	-	-	0	196000	77100	2.5	217000	71300	3	7800000	2110000	3.7	1160000	800000	1.5	8320000	2280000	3.6	3	Y	N	N	Y
XP_022279728	CD63	CD63 antigen [Canis lupus familiaris]	4	1	1	25.6	7.33	-	-	0	259000	132000	2	-	-	0	-	-	0	-	-	0	-	-	0	1	N	Y	N	N
XP_022261237	CD81; LOC611606	CD81 antigen [Canis lupus familiaris]	18	2	2	25.2	5.11	-	-	0	-	-	0	-	-	0	ID only	ID only	1	-	-	0	ID only	ID only	1	2	N	Y	N	N
XP_852647	CD83	CD83 antigen isoform X1 [Canis lupus familiaris]	7	1	1	22	8.18	ID only	ID only	1	-	-	0	-	-	0	-	-	0	-	-	0	-	-	0	1	N	N	N	N
XP_022266920	CD9	CD9 antigen [Canis lupus familiaris]	18	3	3	17.6	6.73	-	-	0	1030000	614000	1.7	-	-	0	1360000	985000	1.4	-	-	0	7360000	1770000	4.1	3	N	Y	Y	N
XP_013967026	CD99	CD99 antigen isoform X1 [Canis lupus familiaris]	11	1	1	16.6	4.49	-	-	0	-	-	0	-	-	0	ID only	ID only	1	-	-	0	-	-	0	1	N	Y	N	N
XP_005618779	LOC102154780	CDGSH iron-sulfur domain-containing protein 1 [Canis lupus familiaris]	12	1	1	14.3	8.7	-	-	0	-	-	0	-	-	0	-	-	0	-	-	0	164000	49500	3.3	1	N	N	N	N
XP_013965411	LOC100855477; CISD2	CDGSH iron-sulfur domain-containing protein 2 [Canis lupus familiaris]	10	1	1	15.3	9.61	-	-	0	-	-	0	-	-	0	-	-	0	-	-	0	ID only	ID only	1	1	N	Y	N	N
NP_001003254	CDC42	cell division control protein 42 homolog precursor [Canis lupus familiaris]	26	3	3	21.2	6.55	-	-	0	ID only	ID only	1	633000	213000	3	1950000	921000	2.1	1230000	205000	6	3170000	1290000	2.5	3	Y	Y	N	N
XP_013970715	CEP170	centrosomal protein of 170 kDa isoform X1 [Canis lupus familiaris]	1	1	1	176.2	7.09	-	-	0	-	-	0	-	-	0	-	-	0	-	-	0	57000	40700	1.4	1	N	Y	N	N
XP_005634613	CP	ceruloplasmin isoform X1 [Canis lupus familiaris]	14	15	15	125.8	6.76	111000	24600	4.5	ID only	ID only	1	2540000	165000	15.4	1890000	76300	24.7	11300000	1070000	10.5	2760000	136000	20.3	3	Y	Y	Y	Y
XP_851997	PRKG1	cGMP-dependent protein kinase 1 isoform X1 [Canis lupus familiaris]	3	7	7	76.3	5.95	36200	34000	1.1	-	-	0	2850000	1420000	2	235000	174000	1.3	7590000	4630000	1.6	199000	210000	1	3	N	Y	N	N
XP_005637137	LOC610836; PDE3A	cGMP-inhibited 3',5'-cyclic phosphodiesterase A isoform X1 [Canis lupus familiaris]	2	1	1	109.9	6.01	-	-	0	-	-	0	326000	110000	3	-	-	0	ID only	ID only	1	-	-	0	2	N	Y	N	N
XP_005639100	PDE5A	cGMP-specific 3',5'-cyclic phosphodiesterase isoform X1 [Canis lupus familiaris]	20	22	22	98.2	6.06	3390000	1480000	2.3	692000	294000	2.4	17000000	7640000	2.2	2010000	1350000	1.5	31100000	19000000	1.6	4010000	2880000	1.4	3	Y	Y	N	N
XP_850536	CHMP2A	charged multivesicular body protein 2a isoform X2 [Canis lupus familiaris]	14	2	2	25.1	5.97	-	-	0	-	-	0	-	-	0	-	-	0	-	-	0	53700	30400	1.8	1	N	Y	N	N
XP_542966	CHMP4B	charged multivesicular body protein 4b [Canis lupus familiaris]	6	1	1	25	4.78	-	-	0	-	-	0	-	-	0	71900	27400	2.6	ID only	ID only	1	92500	41400	2.2	2	Y	Y	N	N
XP_013971713	CHMP6	charged multivesicular body protein 6 [Canis lupus familiaris]	11	1	1	13.1	4.37	-	-	0	ID only	ID only	1	-	-	0	115000	41000	2.8	-	-	0	144000	46000	3.1	3	Y	Y	N	N
NP_001171278	CHI3L1	chitinase-3-like protein 1 precursor [Canis lupus familiaris]	4	7	7	42.6	8.7	-	-	0	-	-	0	851000	77100	11	ID only	ID only	1	3560000	420000	8.5	ID only	ID only	1	2	Y	N	N	N
NP_001239067	CLIC1	chloride intracellular channel protein 1 [Canis lupus familiaris]	37	17	17	27	5.27	43300000	14300000	3	372000	52500	7.1	143000000	79200000	1.8	1930000	505000	3.8	291000000	179000000	1.6	3690000	2460000	1.5	3	Y	Y	Y	N
NP_001182083	CLIC2	chloride intracellular channel protein 2 [Canis lupus familiaris]	20	3	3	27.5	5.44	ID only	ID only	1	-	-	0	536000	306000	1.7	-	-	0	655000	314000	2.1	-	-	0	3	N	N	N	N
XP_544493	CLIC4	chloride intracellular channel protein 4 [Canis lupus familiaris]	12	4	4	28.7	5.44	-	-	0	-	-	0	347000	191000	1.8	-	-	0	587000	195000	3	-	-	0	2	N	Y	N	N
XP_013973370	SLC44A1	choline transporter-like protein 1 isoform X1 [Canis lupus familiaris]	9	6	6	81	8.32	-	-	0	1980000	807000	2.5	-	-	0	5190000	3160000	1.6	ID only	ID only	1	5390000	3100000	1.7	3	N	Y	N	N
XP_005632951	SLC44A2	choline transporter-like protein 2 isoform X1 [Canis lupus familiaris]	8	4	4	80.8	8.12	-	-	0	644000	283000	2.3	-	-	0	1490000	673000	2.2	-	-	0	-	-	0	2	Y	Y	N	N
XP_003432826	SLC44A2	choline transporter-like protein 2 isoform X2 [Canis lupus familiaris]	11	6	6	80.1	8.56	-	-	0	-	-	0	-	-	0	-	-	0	-	-	0	2230000	1020000	2.2	1	N	Y	N	N
XP_022283208	CBX3	chromobox protein homolog 3 isoform X1 [Canis lupus familiaris]	21	3	3	23.2	5.49	ID only	ID only	1	-	-	0	181000	86300	2.1	-	-	0	531000	179000	3	-	-	0	3	Y	Y	N	N
XP_022274682	CHD5	chromodomain-helicase-DNA-binding protein 5 isoform X1 [Canis lupus familiaris]	2	1	1	226.3	6.52	-	-	0	-	-	0	1850000	ID only	10	-	-	0	-	-	0	-	-	0	1	N	N	N	N
XP_005639589	MAATS1; NR1I2	cilia- and flagella-associated protein 91 isoform X1 [Canis lupus familiaris]	1	1	1	90.1	7.72	-	-	0	-	-	0	365000	71700	5.1	-	-	0	-	-	0	-	-	0	1	N	N	N	N
XP_013961798	CLYBL	citrate lyase subunit beta-like protein, mitochondrial isoform X1 [Canis lupus familiaris]	6	1	1	38.8	8.9	-	-	0	-	-	0	-	-	0	-	-	0	ID only	ID only	1	-	-	0	1	N	Y	N	N
XP_531634	CS	citrate synthase, mitochondrial isoform X1 [Canis lupus familiaris]	18	4	4	51.8	8.25	738000	104000	7.1	ID only	ID only	1	1560000	1110000	1.4	-	-	0	2420000	2020000	1.2	-	-	0	3	N	Y	N	N
XP_852132	CMTM6	CKLF-like MARVEL transmembrane domain-containing protein 6 [Canis lupus familiaris]	25	3	3	19.9	5.26	-	-	0	70500	55300	1.3	-	-	0	-	-	0	-	-	0	1380000	100000	13.7	2	N	Y	N	N
XP_005624805	CLTC	clathrin heavy chain 1 isoform X1 [Canis lupus familiaris]	36	41	41	192.3	5.69	4400000	5970000	0.7	5030000	1990000	2.5	37200000	34500000	1.1	24600000	15700000	1.6	64800000	55000000	1.2	35200000	21100000	1.7	3	N	Y	N	N
XP_536451	CLINT1	clathrin interactor 1 isoform X1 [Canis lupus familiaris]	2	1	1	70.3	6.58	-	-	0	-	-	0	-	-	0	-	-	0	-	-	0	ID only	ID only	1	1	N	Y	N	N
XP_003639440	LOC100856559; CLTA	clathrin light chain A isoform X4 [Canis lupus familiaris]	15	3	3	23.7	4.53	-	-	0	-	-	0	417000	332000	1.3	725000	462000	1.6	1590000	1720000	0.9	899000	591000	1.5	2	N	Y	N	N
XP_022261749	CLASP1	CLIP-associating protein 1 isoform X1 [Canis lupus familiaris]	1	6	6	177.4	8.69	40200	51700	0.8	8210	2160	3.8	376000	10300	36.5	115000	25000	4.6	319000	58100	5.5	102000	32000	3.2	3	Y	Y	N	N
NP_001003370	CLU	clusterin precursor [Canis lupus familiaris]	12	4	4	51.8	5.91	-	-	0	-	-	0	ID only	ID only	1	447000	34400	13	724000	196000	3.7	129000	42400	3	2	Y	Y	Y	N
XP_546800	COTL1	coactosin-like protein, partial [Canis lupus familiaris]	13	8	8	13.8	5.01	2370000	850000	2.8	-	-	0	4120000	2270000	1.8	-	-	0	19200000	8190000	2.3	ID only	ID only	1	3	Y	Y	Y	N
XP_005622605	F5	coagulation factor V [Canis lupus familiaris]	3	11	11	251.7	5.77	-	-	0	581000	55500	10.5	4190000	675000	6.2	5340000	882000	6.1	1030000	292000	3.5	2190000	396000	5.5	3	Y	Y	Y	Y
XP_534191	F10	coagulation factor X isoform X1 [Canis lupus familiaris]	2	1	1	53.5	5.12	-	-	0	-	-	0	78000	ID only	10	-	-	0	-	-	0	-	-	0	1	N	N	N	N
XP_022270129	F13A1	coagulation factor XIII A chain [Canis lupus familiaris]	59	48	48	83.3	6.2	35700000	58700000	0.6	58100000	9420000	6.2	184000000	275000000	0.7	161000000	70700000	2.3	277000000	519000000	0.5	184000000	76900000	2.4	3	Y	Y	Y	N
XP_005622353	F13B	coagulation factor XIII B chain [Canis lupus familiaris]	3	2	2	74.3	6.65	-	-	0	-	-	0	96200	ID only	10	274000	56900	4.8	ID only	ID only	1	-	-	0	2	N	Y	N	N
XP_013966632	COPA	coatomer subunit alpha, partial [Canis lupus familiaris]	7	6	6	137.7	7.59	-	-	0	-	-	0	-	-	0	160000	63500	2.5	-	-	0	1850000	638000	2.9	2	Y	Y	N	N
XP_022263567	COPB1	coatomer subunit beta [Canis lupus familiaris]	4	2	2	107.1	6.05	-	-	0	-	-	0	-	-	0	362000	207000	1.7	-	-	0	-	-	0	1	N	Y	N	N
XP_022264396	COPB2	coatomer subunit beta' isoform X2 [Canis lupus familiaris]	15	10	10	102.3	5.3	-	-	0	250000	99900	2.5	-	-	0	1140000	416000	2.7	-	-	0	3420000	1950000	1.8	3	Y	Y	N	N
XP_536552	ARCN1	coatomer subunit delta [Canis lupus familiaris]	2	1	1	57.2	6.21	-	-	0	-	-	0	-	-	0	-	-	0	ID only	ID only	1	180000	152000	1.2	1	N	Y	N	N
XP_005632735	COPE	coatomer subunit epsilon isoform X1 [Canis lupus familiaris]	19	5	5	34.5	5.06	-	-	0	ID only	ID only	1	-	-	0	672000	108000	6.2	ID only	ID only	1	1750000	1090000	1.6	3	N	Y	N	N
XP_533723	COPG1	coatomer subunit gamma-1 [Canis lupus familiaris]	1	2	2	97.7	5.41	-	-	0	-	-	0	-	-	0	171000	55700	3.1	ID only	ID only	1	187000	114000	1.6	2	N	Y	N	N
XP_022282913	COPG2	coatomer subunit gamma-2 isoform X1 [Canis lupus familiaris]	1	1	1	124	7.53	ID only	ID only	1	ID only	ID only	1	ID only	ID only	1	226000	102000	2.2	ID only	ID only	1	ID only	ID only	1	3	N	Y	N	N
XP_005617727	LOC102155463; COPZ1	coatomer subunit zeta-1 [Canis lupus familiaris]	6	1	1	20.2	4.81	-	-	0	-	-	0	-	-	0	49700	27200	1.8	-	-	0	104000	37600	2.8	2	N	Y	N	N
XP_547762	COCH	cochlin [Canis lupus familiaris]	3	2	2	59.6	8.1	ID only	ID only	1	-	-	0	219000	ID only	10	-	-	0	ID only	ID only	1	-	-	0	3	N	N	Y	N
XP_533231	CFL1	cofilin-1 [Canis lupus familiaris]	58	21	12	18.5	8.09	222000000	98900000	2.2	5120000	2720000	1.9	394000000	249000000	1.6	6610000	3710000	1.8	722000000	234000000	3.1	11900000	8600000	1.4	3	Y	Y	Y	Y
XP_022276544	LOC102153978	cofilin-1-like [Canis lupus familiaris]	49	15	1	21.3	7.33	-	-	0	-	-	0	ID only	ID only	1	-	-	0	ID only	ID only	1	-	-	0	2	N	Y	N	N
XP_547771	CFL2	cofilin-2 isoform X1 [Canis lupus familiaris]	43	8	2	18.7	7.88	-	-	0	-	-	0	1920000	1290000	1.5	-	-	0	3510000	883000	4	-	-	0	2	N	Y	N	N
XP_013972873	CCDC138	coiled-coil domain-containing protein 138 isoform X1 [Canis lupus familiaris]	2	1	1	77.1	8.32	-	-	0	-	-	0	-	-	0	474000	311000	1.5	-	-	0	-	-	0	1	N	N	N	N
XP_022265414	CCDC25	coiled-coil domain-containing protein 25 isoform X1 [Canis lupus familiaris]	6	1	1	25.8	8.44	-	-	0	-	-	0	-	-	0	-	-	0	102000	56400	1.8	-	-	0	1	N	Y	N	N
XP_013969351	CCDC27	coiled-coil domain-containing protein 27 isoform X1 [Canis lupus familiaris]	3	1	1	71	5.25	-	-	0	-	-	0	-	-	0	-	-	0	-	-	0	ID only	ID only	1	1	N	N	N	N
XP_533016	CSDE1	cold shock domain-containing protein E1 isoform X1 [Canis lupus familiaris]	2	1	1	93.6	6.52	-	-	0	-	-	0	-	-	0	-	-	0	ID only	ID only	1	-	-	0	1	N	Y	N	N
XP_005640450	COL5A2	collagen alpha-2(V) chain isoform X1 [Canis lupus familiaris]	2	2	2	144.7	6.79	ID only	ID only	1	-	-	0	-	-	0	-	-	0	-	-	0	-	-	0	1	N	N	N	N
XP_850727	COMMD9	COMM domain-containing protein 9 isoform X1 [Canis lupus familiaris]	6	1	1	21.8	5.41	-	-	0	-	-	0	-	-	0	-	-	0	-	-	0	ID only	ID only	1	1	N	Y	N	N
XP_535367	C1QA	complement C1q subcomponent subunit A [Canis lupus familiaris]	8	1	1	25.9	9.04	-	-	0	-	-	0	-	-	0	-	-	0	-	-	0	466000	ID only	10	1	N	N	N	N
XP_544507	C1QB	complement C1q subcomponent subunit B [Canis lupus familiaris]	6	1	1	26.3	9.03	-	-	0	-	-	0	-	-	0	-	-	0	-	-	0	ID only	ID only	1	1	N	N	N	N
XP_003433793	C1QC	complement C1q subcomponent subunit C [Canis lupus familiaris]	17	3	3	25.6	7.84	ID only	ID only	1	ID only	ID only	1	-	-	0	233000	58600	4	ID only	ID only	1	1950000	730000	2.7	3	Y	N	N	N
XP_534901	C1R	complement C1r subcomponent [Canis lupus familiaris]	2	1	1	80.1	6.24	-	-	0	-	-	0	ID only	ID only	1	-	-	0	266000	138000	1.9	-	-	0	2	N	Y	N	N
XP_005637267	C1S	complement C1s subcomponent [Canis lupus familiaris]	2	1	1	77.5	4.93	-	-	0	-	-	0	-	-	0	-	-	0	ID only	ID only	1	-	-	0	1	N	Y	N	N
XP_022281566	C2	complement C2 isoform X2 [Canis lupus familiaris]	3	2	2	87.1	8.13	-	-	0	-	-	0	ID only	ID only	1	-	-	0	-	-	0	-	-	0	1	N	N	N	N
XP_022262838	C3	complement C3 [Canis lupus familiaris]	31	68	62	176	7.12	48100000	8580000	5.6	11100000	439000	25.3	281000000	49200000	5.7	40200000	5110000	7.9	315000000	68000000	4.6	31600000	4730000	6.7	3	Y	Y	Y	Y
XP_022281488	C4A; LOC481722	complement C4-A [Canis lupus familiaris]	23	35	35	192.8	7.01	3770000	636000	5.9	2540000	189000	13.4	27600000	3710000	7.4	11200000	1730000	6.5	46600000	8390000	5.6	18500000	4170000	4.4	3	Y	Y	Y	N
XP_022280741	C5	complement C5 [Canis lupus familiaris]	2	9	9	183.6	6.37	84700	12300	6.9	86800	6370	13.6	4010000	501000	8	3150000	333000	9.5	2920000	575000	5.1	393000	26800	14.7	3	Y	Y	Y	N
XP_546568	C1QBP	complement component 1 Q subcomponent-binding protein, mitochondrial [Canis lupus familiaris]	7	3	3	30.1	4.86	-	-	0	-	-	0	36300	31600	1.2	-	-	0	527000	347000	1.5	-	-	0	2	N	Y	N	N
XP_546339	C7	complement component C7 isoform X1 [Canis lupus familiaris]	7	4	4	94.9	6.81	ID only	ID only	1	-	-	0	1100000	66700	16.5	-	-	0	2480000	162000	15.3	-	-	0	3	Y	Y	N	N
XP_003639070	LOC100855712; C8A	complement component C8 alpha chain isoform X1 [Canis lupus familiaris]	2	2	2	66.2	6.93	-	-	0	-	-	0	102000	ID only	10	148000	ID only	10	385000	ID only	10	152000	ID only	10	2	Y	Y	Y	N
XP_536694	C8B	complement component C8 beta chain [Canis lupus familiaris]	3	1	1	67	7.8	ID only	ID only	1	-	-	0	-	-	0	-	-	0	-	-	0	-	-	0	1	N	N	N	N
XP_022276564	LOC102157092; CR1L	complement component receptor 1-like protein isoform X1 [Canis lupus familiaris]	7	3	3	99.7	7.17	-	-	0	-	-	0	-	-	0	-	-	0	-	-	0	336000	ID only	10	1	N	N	N	N
XP_003431724	CFB	complement factor B [Canis lupus familiaris]	18	10	10	86.3	7.37	1890000	443000	4.3	ID only	ID only	1	3900000	453000	8.6	-	-	0	9190000	1510000	6.1	-	-	0	3	Y	Y	Y	N
XP_013977853	CFD	complement factor D isoform X1 [Canis lupus familiaris]	8	2	2	36.5	7.91	515000	40300	12.8	-	-	0	225000	41400	5.4	-	-	0	426000	ID only	10	-	-	0	3	Y	Y	N	N
XP_536110	CFH; LOC478952	complement factor H [Canis lupus familiaris]	7	7	7	139.6	6.49	677000	196000	3.5	729000	14400	50.5	3380000	240000	14.1	1880000	94700	19.9	4630000	497000	9.3	2050000	62400	32.9	3	Y	Y	Y	Y
XP_547381	CFHR5	complement factor H-related protein 5 [Canis lupus familiaris]	2	1	1	64.4	7.71	-	-	0	-	-	0	-	-	0	-	-	0	-	-	0	ID only	ID only	1	1	N	N	N	N
XP_005639325	CFI	complement factor I isoform X3 [Canis lupus familiaris]	17	6	6	67.1	7.5	969000	13200	73.5	-	-	0	3440000	391000	8.8	-	-	0	6740000	937000	7.2	-	-	0	3	Y	N	N	N
XP_005638452	COPS2	COP9 signalosome complex subunit 2 isoform X1 [Canis lupus familiaris]	2	1	1	52.4	5.47	-	-	0	-	-	0	253000	78800	3.2	-	-	0	-	-	0	-	-	0	1	N	Y	N	N
XP_864801	COPS3	COP9 signalosome complex subunit 3 isoform X1 [Canis lupus familiaris]	4	1	1	47.9	6.65	-	-	0	-	-	0	ID only	ID only	1	127000	23600	5.4	141000	60400	2.3	ID only	ID only	1	2	N	Y	N	N
XP_003640149	LOC100856586; COPS4	COP9 signalosome complex subunit 4 isoform X1 [Canis lupus familiaris]	12	5	5	46.2	5.83	ID only	ID only	1	-	-	0	ID only	ID only	1	577000	47700	12.1	ID only	ID only	1	251000	65500	3.8	3	Y	Y	N	N
XP_005638087	COPS5	COP9 signalosome complex subunit 5 isoform X1 [Canis lupus familiaris]	4	1	1	37.5	6.54	-	-	0	-	-	0	-	-	0	ID only	ID only	1	-	-	0	-	-	0	1	N	Y	N	N
XP_536866	COPS6	COP9 signalosome complex subunit 6 [Canis lupus familiaris]	8	2	2	38	5.88	-	-	0	-	-	0	407000	151000	2.7	296000	63900	4.6	612000	320000	1.9	-	-	0	2	N	Y	N	N
XP_005635904	COPS7B	COP9 signalosome complex subunit 7b [Canis lupus familiaris]	10	2	2	29.6	6.15	-	-	0	-	-	0	261000	128000	2	199000	84800	2.4	449000	241000	1.9	-	-	0	2	N	Y	N	N
XP_534612	COPS8	COP9 signalosome complex subunit 8 [Canis lupus familiaris]	13	3	3	23.2	5.38	-	-	0	ID only	ID only	1	456000	186000	2.4	485000	152000	3.2	774000	250000	3.1	386000	140000	2.8	3	Y	Y	N	N
NP_001165220	CPNE1	copine-1 [Canis lupus familiaris]	6	9	8	59.1	5.81	42200	83400	0.5	-	-	0	6330000	3550000	1.8	253000	ID only	10	10500000	7370000	1.4	222000	108000	2	3	Y	Y	N	N
XP_022268106	CPNE3	copine-3 isoform X1 [Canis lupus familiaris]	14	14	13	59.6	5.6	7240000	1160000	6.2	60200	32500	1.9	4530000	2650000	1.7	107000	ID only	10	15000000	13500000	1.1	1210000	131000	9.2	3	Y	Y	N	N
XP_005620950	CBFB	core-binding factor subunit beta [Canis lupus familiaris]	22	2	2	19.5	5.36	-	-	0	-	-	0	207000	80500	2.6	-	-	0	1270000	391000	3.3	-	-	0	2	Y	Y	N	N
XP_547069	CORO1A	coronin-1A [Canis lupus familiaris]	38	23	23	51	6.68	35900000	8320000	4.3	1790000	364000	4.9	46700000	26800000	1.7	7380000	3120000	2.4	92200000	68500000	1.3	6150000	3330000	1.8	3	Y	Y	Y	N
XP_013976696	CORO1B; LOC476007	coronin-1B [Canis lupus familiaris]	39	18	18	54.2	6.19	21200000	4180000	5.1	732000	212000	3.5	65800000	21200000	3.1	16800000	10500000	1.6	112000000	61400000	1.8	15200000	12600000	1.2	3	Y	Y	N	N
XP_543444	CORO1C	coronin-1C [Canis lupus familiaris]	37	18	18	53.2	7.08	16800000	2640000	6.4	443000	188000	2.4	33400000	8970000	3.7	10500000	6030000	1.7	56500000	31600000	1.8	8830000	5610000	1.6	3	Y	Y	Y	N
XP_533427	ABRACL	costars family protein ABRACL [Canis lupus familiaris]	77	5	5	9.1	6.29	3090000	162000	19.1	-	-	0	3380000	733000	4.6	-	-	0	6160000	2990000	2.1	-	-	0	3	Y	Y	N	N
XP_003639259	LOC100855552; CKB	creatine kinase B-type [Canis lupus familiaris]	40	22	22	42.7	5.78	153000000	28300000	5.4	296000	164000	1.8	186000000	101000000	1.8	3700000	1410000	2.6	185000000	128000000	1.4	3980000	2320000	1.7	3	N	N	N	N
NP_001138686	CKMT2	creatine kinase S-type, mitochondrial precursor [Canis lupus familiaris]	6	1	1	47.3	8.21	ID only	ID only	1	-	-	0	ID only	ID only	1	-	-	0	ID only	ID only	1	-	-	0	3	N	N	N	N
XP_849949	CRKL	crk-like protein [Canis lupus familiaris]	27	5	5	33.8	6.74	959000	286000	3.4	-	-	0	1830000	922000	2	-	-	0	5000000	2590000	1.9	-	-	0	3	Y	Y	Y	N
XP_013961966	CTDSPL	CTD small phosphatase-like protein [Canis lupus familiaris]	4	1	1	31.5	6.52	-	-	0	156000	46300	3.4	-	-	0	141000	23000	6.1	73400	21500	3.4	185000	61700	3	3	Y	Y	N	N
XP_022263612	CELF2	CUGBP Elav-like family member 2 isoform X1 [Canis lupus familiaris]	3	1	1	58.6	9.03	156000	36900	4.2	-	-	0	ID only	ID only	1	-	-	0	-	-	0	-	-	0	2	N	Y	N	N
XP_022279895	CAND1	cullin-associated NEDD8-dissociated protein 1 [Canis lupus familiaris]	4	7	7	133.5	5.74	ID only	ID only	1	-	-	0	3130000	1410000	2.2	197000	55000	3.6	5220000	2650000	2	188000	106000	1.8	3	Y	Y	N	N
XP_005629809	CDK5	cyclin-dependent-like kinase 5 [Canis lupus familiaris]	5	4	3	44.6	8.41	-	-	0	-	-	0	257000	141000	1.8	-	-	0	1030000	609000	1.7	73300	56100	1.3	2	N	Y	N	N
XP_003639869	LOC607874	cystatin-C-like [Canis lupus familiaris]	29	6	6	16.4	9.32	10400000	495000	21.1	ID only	ID only	1	2720000	ID only	10	-	-	0	14200000	495000	28.6	724000	198000	3.7	3	Y	Y	N	N
XP_540840	CST6	cystatin-M [Canis lupus familiaris]	8	1	1	16.1	8.6	ID only	ID only	1	-	-	0	-	-	0	-	-	0	-	-	0	-	-	0	1	N	N	N	N
XP_022276518	CSRP1; LOC607054	cysteine and glycine-rich protein 1 [Canis lupus familiaris]	51	9	9	20.6	8.57	16600000	4410000	3.8	2000000	975000	2.1	8080000	5000000	1.6	8890000	5510000	1.6	24100000	12900000	1.9	17000000	10500000	1.6	3	N	Y	Y	N
XP_022265751	ATG4B	cysteine protease ATG4B [Canis lupus familiaris]	5	1	1	35.8	5.3	-	-	0	-	-	0	-	-	0	-	-	0	ID only	ID only	1	-	-	0	1	N	Y	N	N
XP_851224	CARS	cysteine--tRNA ligase, cytoplasmic isoform X1 [Canis lupus familiaris]	2	5	5	94.6	6.79	16100	15500	1	-	-	0	ID only	ID only	1	-	-	0	1700000	854000	2	ID only	ID only	1	3	N	Y	N	N
XP_535960	CYBRD1	cytochrome b reductase 1 [Canis lupus familiaris]	15	3	3	30.9	8.63	-	-	0	-	-	0	-	-	0	184000	93700	2	-	-	0	597000	290000	2.1	2	Y	N	N	N
XP_005632643	UQCRC1; LOC608455	cytochrome b-c1 complex subunit 1, mitochondrial isoform X1 [Canis lupus familiaris]	6	2	2	52.9	6.47	-	-	0	ID only	21200	0.5	-	-	0	347000	219000	1.6	-	-	0	438000	291000	1.5	3	N	Y	N	N
XP_536942	UQCRC2; LOC479815	cytochrome b-c1 complex subunit 2, mitochondrial [Canis lupus familiaris]	12	4	4	48.3	9	-	-	0	-	-	0	-	-	0	211000	195000	1.1	-	-	0	805000	515000	1.6	2	N	Y	N	N
NP_001180227	CYB5A	cytochrome b5 [Canis lupus familiaris]	16	1	1	15.3	5.05	-	-	0	-	-	0	ID only	ID only	1	ID only	ID only	1	-	-	0	-	-	0	1	N	Y	N	N
XP_005625743	COX5B	cytochrome c oxidase polypeptide Vb isoform X1 [Canis lupus familiaris]	14	1	1	15.1	8.62	-	-	0	-	-	0	-	-	0	-	-	0	-	-	0	32200	26100	1.2	1	N	Y	N	N
NP_008474	COX2	cytochrome c oxidase subunit II (mitochondrion) [Canis lupus familiaris]	15	2	2	26	4.73	-	-	0	-	-	0	-	-	0	345000	192000	1.8	-	-	0	374000	334000	1.1	2	N	Y	N	N
XP_003639527	LOC100856334; NDUFA4	cytochrome c oxidase subunit NDUFA4 [Canis lupus familiaris]	12	1	1	9.3	9.52	-	-	0	ID only	22600	0.5	-	-	0	-	-	0	-	-	0	-	-	0	1	N	Y	N	N
XP_532351	CYC1	cytochrome c1, heme protein, mitochondrial [Canis lupus familiaris]	7	2	2	35.3	8.72	-	-	0	-	-	0	-	-	0	413000	290000	1.4	-	-	0	335000	212000	1.6	2	N	Y	N	N
XP_013971728	CYTH1	cytohesin-1 isoform X2 [Canis lupus familiaris]	3	1	1	46.5	5.87	ID only	ID only	1	-	-	0	96100	ID only	10	-	-	0	172000	115000	1.5	-	-	0	3	Y	N	N	N
XP_548277	CRLF3	cytokine receptor-like factor 3 isoform X2 [Canis lupus familiaris]	19	4	4	49.3	5.02	378000	29300	12.9	-	-	0	ID only	ID only	1	-	-	0	872000	350000	2.5	-	-	0	3	N	Y	N	N
XP_538698	ACO1	cytoplasmic aconitate hydratase [Canis lupus familiaris]	6	23	23	98.3	7.99	486000	552000	0.9	-	-	0	11100000	7990000	1.4	-	-	0	29600000	21800000	1.4	160000	ID only	10	3	N	Y	N	N
XP_537556	DYNC1H1	cytoplasmic dynein 1 heavy chain 1 [Canis lupus familiaris]	3	11	11	532.1	6.43	-	-	0	292000	125000	2.3	-	-	0	1300000	1080000	1.2	-	-	0	696000	108000	6.5	3	Y	Y	N	N
XP_013966288	DYNC1I2	cytoplasmic dynein 1 intermediate chain 2 isoform X1 [Canis lupus familiaris]	2	2	2	72.7	5.24	ID only	ID only	1	32000	8520	3.8	245000	86700	2.8	243000	179000	1.4	387000	265000	1.5	350000	194000	1.8	3	N	Y	N	N
XP_534236	DYNC1LI1	cytoplasmic dynein 1 light intermediate chain 1 [Canis lupus familiaris]	7	2	2	56.5	6.29	-	-	0	73400	46500	1.6	-	-	0	ID only	302000	0.5	-	-	0	ID only	224000	0.5	3	N	Y	N	N
XP_005620951	DYNC1LI2	cytoplasmic dynein 1 light intermediate chain 2, partial [Canis lupus familiaris]	6	2	2	50.9	6.77	-	-	0	-	-	0	-	-	0	28100	36800	0.8	-	-	0	16300	39200	0.4	2	N	Y	N	N
XP_013967762	CYFIP1	cytoplasmic FMR1-interacting protein 1 [Canis lupus familiaris]	9	11	11	145.5	6.83	ID only	45900	0.5	718000	310000	2.3	-	-	0	2730000	1470000	1.9	-	-	0	5620000	2980000	1.9	3	N	Y	N	N
XP_005619311	CYFIP2	cytoplasmic FMR1-interacting protein 2 isoform X1 [Canis lupus familiaris]	2	2	2	148.3	7.31	-	-	0	-	-	0	-	-	0	-	-	0	907000	876000	1	-	-	0	1	N	Y	N	N
XP_005626041	NCK2	cytoplasmic protein NCK2 [Canis lupus familiaris]	3	6	6	42.9	7.2	2420000	164000	14.7	ID only	ID only	1	555000	112000	5	-	-	0	1450000	560000	2.6	ID only	ID only	1	3	Y	Y	N	N
XP_022261180	CKAP5	cytoskeleton-associated protein 5 isoform X1 [Canis lupus familiaris]	1	2	2	225.2	7.8	-	-	0	-	-	0	-	-	0	-	-	0	555000	201000	2.8	-	-	0	1	N	Y	N	N
XP_005618600	LAP3	cytosol aminopeptidase [Canis lupus familiaris]	14	13	13	56.2	7.93	6080000	772000	7.9	ID only	ID only	1	7150000	3650000	2	772000	43400	17.8	11800000	6780000	1.7	957000	584000	1.6	3	Y	Y	N	N
XP_852141	NT5C3; NT5C3A	cytosolic 5'-nucleotidase 3A isoform X1 [Canis lupus familiaris]	17	15	15	37.5	6.09	30000000	8180000	3.7	ID only	ID only	1	75500000	36100000	2.1	1020000	493000	2.1	116000000	67100000	1.7	1160000	971000	1.2	3	Y	Y	N	N
XP_005620510	ACOT7	cytosolic acyl coenzyme A thioester hydrolase isoform X1 [Canis lupus familiaris]	29	13	13	40.7	8.68	10600000	2620000	4	1840000	332000	5.5	18800000	12500000	1.5	2480000	1100000	2.3	39400000	25100000	1.6	3980000	2360000	1.7	3	Y	Y	N	N
XP_005615371	CNDP2	cytosolic non-specific dipeptidase [Canis lupus familiaris]	8	4	4	52.6	5.67	720000	44200	16.3	-	-	0	1630000	593000	2.7	-	-	0	1850000	1190000	1.5	-	-	0	3	Y	Y	N	N
XP_005637739	NT5C2	cytosolic purine 5'-nucleotidase isoform X1 [Canis lupus familiaris]	4	1	1	65.8	6.3	-	-	0	-	-	0	-	-	0	-	-	0	ID only	ID only	1	-	-	0	1	N	Y	N	N
XP_005636042	D2HGDH	D-2-hydroxyglutarate dehydrogenase, mitochondrial isoform X1 [Canis lupus familiaris]	12	3	3	42	6.19	17900	5480	3.3	-	-	0	-	-	0	-	-	0	85600	141000	0.6	-	-	0	2	N	N	N	N
XP_013965643	BDH1	D-beta-hydroxybutyrate dehydrogenase, mitochondrial, partial [Canis lupus familiaris]	3	1	1	35.3	8.72	-	-	0	-	-	0	-	-	0	-	-	0	-	-	0	104000	70600	1.5	1	N	Y	N	N
XP_013962554	DTD1	D-tyrosyl-tRNA(Tyr) deacylase 1 isoform X1 [Canis lupus familiaris]	13	1	1	28.3	9.48	-	-	0	-	-	0	424000	186000	2.3	-	-	0	712000	ID only	10	-	-	0	2	Y	Y	N	N
XP_849075	APPL1	DCC-interacting protein 13-alpha isoform X1 [Canis lupus familiaris]	4	2	2	79.6	5.34	175000	ID only	10	-	-	0	-	-	0	-	-	0	ID only	ID only	1	-	-	0	2	N	Y	N	N
XP_848655	DCUN1D1	DCN1-like protein 1 isoform X2 [Canis lupus familiaris]	21	3	3	30.5	5.25	-	-	0	-	-	0	ID only	ID only	1	-	-	0	245000	ID only	10	-	-	0	2	N	Y	N	N
XP_849018	DAP	death-associated protein 1 isoform X1 [Canis lupus familiaris]	27	1	1	11.2	9.36	79200	54900	1.4	-	-	0	-	-	0	-	-	0	-	-	0	-	-	0	1	N	Y	N	N
XP_022265565	DOCK10	dedicator of cytokinesis protein 10 isoform X1 [Canis lupus familiaris]	1	2	2	254.4	7.09	-	-	0	-	-	0	-	-	0	-	-	0	-	-	0	82900	31800	2.6	1	N	Y	N	N
XP_003433384	DOCK5	dedicator of cytokinesis protein 5 isoform X1 [Canis lupus familiaris]	1	1	1	215.2	7.97	-	-	0	ID only	ID only	1	-	-	0	-	-	0	-	-	0	ID only	ID only	1	2	N	Y	N	N
XP_533535	DOCK8	dedicator of cytokinesis protein 8 isoform X1 [Canis lupus familiaris]	1	2	2	231.1	6.81	-	-	0	-	-	0	-	-	0	-	-	0	-	-	0	350000	131000	2.7	1	N	Y	N	N
XP_537465	DHRS7	dehydrogenase/reductase SDR family member 7 [Canis lupus familiaris]	4	1	1	38.3	7.68	-	-	0	-	-	0	-	-	0	-	-	0	-	-	0	44700	14900	3	1	N	Y	N	N
XP_005642122	DHRSX	dehydrogenase/reductase SDR family member on chromosome X, partial [Canis lupus familiaris]	5	1	1	38.7	7.21	-	-	0	-	-	0	-	-	0	-	-	0	-	-	0	ID only	ID only	1	1	N	Y	N	N
XP_855370	ALAD	delta-aminolevulinic acid dehydratase [Canis lupus familiaris]	8	4	4	36.1	7.15	ID only	ID only	1	-	-	0	2090000	1540000	1.4	1380000	452000	3.1	1730000	1630000	1.1	766000	261000	2.9	3	Y	Y	Y	N
XP_022266042	DENR	density-regulated protein isoform X1 [Canis lupus familiaris]	13	2	2	23.3	5.22	-	-	0	-	-	0	-	-	0	-	-	0	294000	69400	4.2	-	-	0	1	N	Y	N	N
XP_849027	DCTD; LOC607328	deoxycytidylate deaminase [Canis lupus familiaris]	11	4	4	18.8	7.59	130000	31200	4.2	-	-	0	560000	262000	2.1	-	-	0	1440000	445000	3.2	ID only	ID only	1	3	Y	Y	N	N
XP_013967115	DNASE1L1	deoxyribonuclease-1-like 1 isoform X1 [Canis lupus familiaris]	2	1	1	33.3	6.44	-	-	0	-	-	0	-	-	0	56500	20900	2.7	-	-	0	118000	34000	3.5	2	Y	Y	N	N
XP_022266783	DERA	deoxyribose-phosphate aldolase, partial [Canis lupus familiaris]	4	2	2	35.8	8.66	-	-	0	-	-	0	-	-	0	444000	82000	5.4	-	-	0	337000	190000	1.8	2	N	Y	N	N
XP_545329	DSP	desmoplakin [Canis lupus familiaris]	1	3	3	332	7.03	-	-	0	-	-	0	-	-	0	614000	410000	1.5	-	-	0	319000	205000	1.6	2	N	N	N	N
XP_005634815	DSTN	destrin [Canis lupus familiaris]	25	4	3	16.6	8.34	658000	244000	2.7	-	-	0	551000	281000	2	-	-	0	1070000	358000	3	-	-	0	3	Y	Y	Y	Y
NP_001073235	DIABLO	diablo homolog, mitochondrial [Canis lupus familiaris]	8	1	1	26.8	6	ID only	55400	0.5	-	-	0	254000	150000	1.7	-	-	0	-	-	0	66600	40500	1.6	3	N	Y	N	N
XP_013968156	DGKQ	diacylglycerol kinase theta isoform X1 [Canis lupus familiaris]	1	1	1	100.1	7.64	-	-	0	-	-	0	-	-	0	-	-	0	61400	85800	0.7	-	-	0	1	N	Y	N	N
NP_001003294	DLD	dihydrolipoyl dehydrogenase, mitochondrial precursor [Canis lupus familiaris]	7	3	3	54.1	7.84	154000	58200	2.6	-	-	0	118000	180000	0.7	-	-	0	174000	533000	0.3	-	-	0	3	N	Y	N	N
XP_003639252	LOC100856446; DLST	dihydrolipoyllysine-residue succinyltransferase component of 2-oxoglutarate dehydrogenase complex, mitochondrial [Canis lupus familiaris]	17	5	5	48.9	8.82	ID only	ID only	1	111000	86000	1.3	ID only	ID only	1	275000	214000	1.3	275000	288000	1	978000	421000	2.3	3	N	Y	N	N
XP_536229	QDPR	dihydropteridine reductase [Canis lupus familiaris]	29	5	5	25.6	7.37	806000	220000	3.7	-	-	0	1850000	1060000	1.7	-	-	0	3380000	2100000	1.6	-	-	0	3	N	Y	N	N
XP_003639489	LOC100856067; DPYS	dihydropyrimidinase [Canis lupus familiaris]	9	13	12	56.4	7.58	1630000	277000	5.9	103000	41500	2.5	5280000	4810000	1.1	1440000	631000	2.3	7540000	9470000	0.8	1110000	342000	3.3	3	Y	N	N	N
XP_849125	DPYSL2	dihydropyrimidinase-related protein 2 isoform X1 [Canis lupus familiaris]	7	5	4	73.5	6.4	ID only	ID only	1	-	-	0	ID only	ID only	1	-	-	0	375000	221000	1.7	90200	ID only	10	3	N	Y	N	N
XP_013963753	DPYSL3	dihydropyrimidinase-related protein 3 isoform X1 [Canis lupus familiaris]	3	1	1	62.2	6.33	-	-	0	-	-	0	-	-	0	ID only	ID only	1	-	-	0	-	-	0	1	N	N	N	N
XP_022275009	DPEP2; LOC611083	dipeptidase 2 [Canis lupus familiaris]	18	8	8	51.7	8.98	35000	17900	2	-	-	0	2960000	1170000	2.5	-	-	0	2840000	790000	3.6	-	-	0	3	Y	Y	N	N
NP_001182763	CTSC	dipeptidyl peptidase 1 precursor [Canis lupus familiaris]	2	2	2	51.7	7.4	-	-	0	-	-	0	-	-	0	59200	ID only	10	327000	ID only	10	139000	ID only	10	2	Y	Y	Y	N
XP_848703	DPP7	dipeptidyl peptidase 2 [Canis lupus familiaris]	2	10	10	59.9	7.25	2310000	38800	59.5	-	-	0	2440000	167000	14.6	111000	ID only	10	11200000	323000	34.7	217000	ID only	10	3	Y	Y	N	N
XP_852423	DPP3	dipeptidyl peptidase 3 isoform X1 [Canis lupus familiaris]	3	17	17	84.6	5.2	377000	414000	0.9	-	-	0	13400000	9140000	1.5	ID only	ID only	1	16400000	12900000	1.3	163000	66500	2.5	3	N	Y	N	N
XP_022262898	DPP9	dipeptidyl peptidase 9 isoform X1 [Canis lupus familiaris]	1	1	1	101.7	6.52	-	-	0	-	-	0	-	-	0	-	-	0	53800	73300	0.7	-	-	0	1	N	Y	N	N
NP_001239318	NUDT3	diphosphoinositol polyphosphate phosphohydrolase 1 [Canis lupus familiaris]	6	1	1	19.5	6.34	-	-	0	-	-	0	244000	ID only	10	-	-	0	-	-	0	-	-	0	1	N	Y	N	N
XP_005629279	NUDT4	diphosphoinositol polyphosphate phosphohydrolase 2 isoform X1 [Canis lupus familiaris]	8	1	1	20.5	6.35	98700	28000	3.5	-	-	0	-	-	0	-	-	0	-	-	0	-	-	0	1	N	N	N	N
XP_852722	DIS3L2	DIS3-like exonuclease 2 isoform X1 [Canis lupus familiaris]	2	1	1	98.7	6.16	-	-	0	-	-	0	ID only	ID only	1	-	-	0	ID only	ID only	1	-	-	0	2	N	N	N	N
XP_852088	DAAM1	disheveled-associated activator of morphogenesis 1 isoform X1 [Canis lupus familiaris]	4	2	2	123.4	7.34	-	-	0	-	-	0	-	-	0	-	-	0	-	-	0	443000	124000	3.6	1	N	Y	N	N
XP_022268233	ADAM10	disintegrin and metalloproteinase domain-containing protein 10 [Canis lupus familiaris]	15	7	7	85.1	8.47	-	-	0	110000	20600	5.3	-	-	0	956000	482000	2	-	-	0	2790000	1410000	2	3	Y	Y	N	N
XP_005641505	DLG3	disks large homolog 3 isoform X1 [Canis lupus familiaris]	2	4	4	94	7.74	110000	11400	9.6	-	-	0	-	-	0	ID only	ID only	1	259000	131000	2	ID only	ID only	1	3	Y	Y	N	N
XP_022264851	DLGAP4	disks large-associated protein 4 isoform X2 [Canis lupus familiaris]	3	2	2	107.6	7.08	-	-	0	-	-	0	337000	115000	2.9	-	-	0	370000	177000	2.1	-	-	0	2	Y	Y	N	N
XP_013973782	LOC100685196	DLA class I histocompatibility antigen, A9/A9 alpha chain-like [Canis lupus familiaris]	25	4	1	24.5	5.92	-	-	0	-	-	0	-	-	0	-	-	0	-	-	0	534000	220000	2.4	1	N	N	N	N
NP_001014768	HLA-DRB1	DLA class II histocompatibility antigen, DR-1 beta chain precursor [Canis lupus familiaris]	6	1	1	30.1	6.15	-	-	0	-	-	0	-	-	0	39100	13100	3	-	-	0	56700	35600	1.6	2	N	N	N	N
XP_533275	DDB1	DNA damage-binding protein 1 [Canis lupus familiaris]	3	7	7	126.9	5.26	69700	62800	1.1	-	-	0	2550000	2320000	1.1	ID only	ID only	1	3140000	2580000	1.2	ID only	ID only	1	3	N	Y	N	N
XP_003639435	DNAJA1	dnaJ homolog subfamily A member 1 isoform X1 [Canis lupus familiaris]	3	1	1	44.8	7.08	-	-	0	-	-	0	-	-	0	ID only	ID only	1	-	-	0	-	-	0	1	N	Y	N	N
XP_852900	DNAJB1	dnaJ homolog subfamily B member 1 isoform X1 [Canis lupus familiaris]	10	2	2	38.1	8.63	-	-	0	-	-	0	-	-	0	ID only	ID only	1	-	-	0	ID only	ID only	1	2	N	Y	N	N
XP_022270032	DNAJB11	dnaJ homolog subfamily B member 11 isoform X1 [Canis lupus familiaris]	5	1	1	39.3	6.4	-	-	0	ID only	ID only	1	-	-	0	ID only	ID only	1	-	-	0	44100	8760	5	3	N	Y	N	N
XP_861635	DNAJB6	dnaJ homolog subfamily B member 6 isoform X1 [Canis lupus familiaris]	4	1	1	36.3	8.9	-	-	0	-	-	0	-	-	0	ID only	ID only	1	-	-	0	ID only	ID only	1	2	N	Y	N	N
XP_543259	DOK2	docking protein 2 [Canis lupus familiaris]	24	9	9	45.6	6.09	6510000	970000	6.7	232000	58600	4	11000000	1600000	6.9	938000	429000	2.2	25000000	4670000	5.4	1820000	1010000	1.8	3	Y	Y	N	N
XP_005619500	DOK3	docking protein 3 [Canis lupus familiaris]	6	2	2	54.8	7.94	-	-	0	-	-	0	1040000	144000	7.3	ID only	ID only	1	1710000	207000	8.3	ID only	ID only	1	2	Y	Y	N	N
XP_537820	DOLK	dolichol kinase [Canis lupus familiaris]	4	1	1	59.2	8.54	-	-	0	-	-	0	-	-	0	762000	457000	1.7	-	-	0	-	-	0	1	N	N	N	N
NP_001003321	DDOST	dolichyl-diphosphooligosaccharide--protein glycosyltransferase 48 kDa subunit precursor [Canis lupus familiaris]	3	1	1	49.6	6.34	-	-	0	-	-	0	-	-	0	-	-	0	-	-	0	ID only	ID only	1	1	N	Y	N	N
XP_848830	RPN1	dolichyl-diphosphooligosaccharide--protein glycosyltransferase subunit 1 [Canis lupus familiaris]	6	3	3	68.5	6.42	-	-	0	63200	66500	1	-	-	0	358000	242000	1.5	-	-	0	869000	635000	1.4	3	N	Y	N	N
XP_005635085	RPN2	dolichyl-diphosphooligosaccharide--protein glycosyltransferase subunit 2 isoform X1 [Canis lupus familiaris]	2	1	1	70.8	6.13	-	-	0	ID only	ID only	1	-	-	0	-	-	0	-	-	0	ID only	ID only	1	2	N	Y	N	N
XP_005642261	DBNL	drebrin-like protein isoform X1 [Canis lupus familiaris]	11	5	5	47.8	4.98	1120000	424000	2.6	-	-	0	-	-	0	-	-	0	-	-	0	ID only	ID only	1	2	N	Y	N	N
XP_005642262	DBNL	drebrin-like protein isoform X2 [Canis lupus familiaris]	36	11	11	47.7	4.98	-	-	0	-	-	0	7110000	3100000	2.3	154000	166000	0.9	9650000	5140000	1.9	-	-	0	2	N	Y	N	N
XP_535669	DAPP1	dual adapter for phosphotyrosine and 3-phosphotyrosine and 3-phosphoinositide [Canis lupus familiaris]	9	3	3	32.2	8.06	727000	140000	5.2	ID only	20200	0.5	1860000	721000	2.6	370000	240000	1.5	2710000	1140000	2.4	434000	249000	1.7	3	Y	Y	N	N
NP_001041559	MAP2K1	dual specificity mitogen-activated protein kinase kinase 1 [Canis lupus familiaris]	6	4	4	43.4	6.62	1490000	197000	7.5	35700	44100	0.8	1990000	202000	9.8	144000	122000	1.2	2790000	685000	4.1	297000	287000	1	3	Y	Y	N	N
NP_001041601	MAP2K2	dual specificity mitogen-activated protein kinase kinase 2 [Canis lupus familiaris]	6	2	1	44.4	6.86	132000	ID only	10	ID only	ID only	1	-	-	0	-	-	0	-	-	0	52700	24300	2.2	2	N	Y	N	N
XP_546666	MAP2K3	dual specificity mitogen-activated protein kinase kinase 3 [Canis lupus familiaris]	3	2	2	39.3	7.43	-	-	0	-	-	0	91300	13900	6.6	-	-	0	142000	40800	3.5	48800	29300	1.7	2	Y	Y	N	N
XP_541858	DUSP7	dual specificity protein phosphatase 7 [Canis lupus familiaris]	5	1	1	45	5.8	-	-	0	-	-	0	ID only	ID only	1	-	-	0	-	-	0	-	-	0	1	N	N	N	N
XP_866352	DCTN1	dynactin subunit 1 isoform X1 [Canis lupus familiaris]	17	15	15	141.8	5.77	ID only	ID only	1	652000	228000	2.9	-	-	0	2720000	1600000	1.7	444000	391000	1.1	3830000	2590000	1.5	3	N	Y	N	N
XP_849674	DCTN2	dynactin subunit 2 isoform X1 [Canis lupus familiaris]	21	6	6	45	5.12	ID only	ID only	1	ID only	22200	0.5	ID only	ID only	1	-	-	0	1060000	510000	2.1	1570000	1130000	1.4	3	N	Y	N	N
XP_859072	DCTN2	dynactin subunit 2 isoform X4 [Canis lupus familiaris]	32	7	7	44.4	5.16	-	-	0	-	-	0	-	-	0	2500000	1830000	1.4	-	-	0	-	-	0	1	N	Y	N	N
XP_531981	DCTN3	dynactin subunit 3 isoform X1 [Canis lupus familiaris]	17	3	3	21.1	5.48	219000	98700	2.2	ID only	ID only	1	ID only	ID only	1	207000	99700	2.1	276000	109000	2.5	574000	198000	2.9	3	Y	Y	N	N
XP_853535	DCTN4	dynactin subunit 4 isoform X1 [Canis lupus familiaris]	5	2	2	53.1	7.55	-	-	0	-	-	0	-	-	0	125000	45300	2.8	ID only	ID only	1	419000	22300	18.8	2	Y	Y	N	N
XP_005637046	DNM1L	dynamin-1-like protein isoform X1 [Canis lupus familiaris]	11	10	10	83.4	6.99	1430000	495000	2.9	539000	433000	1.2	-	-	0	-	-	0	-	-	0	-	-	0	1	N	Y	N	N
XP_864886	DNM1L	dynamin-1-like protein isoform X3 [Canis lupus familiaris]	33	15	1	81.8	6.74	-	-	0	-	-	0	ID only	ID only	1	182000	161000	1.1	618000	334000	1.9	264000	281000	0.9	2	N	Y	N	N
XP_865034	DNM1L	dynamin-1-like protein isoform X9 [Canis lupus familiaris]	35	16	2	78	6.74	-	-	0	-	-	0	4120000	1450000	2.8	2490000	2470000	1	8520000	4660000	1.8	4220000	4140000	1	2	N	Y	N	N
XP_005632939	DNM2	dynamin-2 isoform X1 [Canis lupus familiaris]	10	5	5	99.3	7.27	ID only	ID only	1	143000	170000	0.8	ID only	65500	0.5	702000	491000	1.4	514000	281000	1.8	1390000	1270000	1.1	3	N	Y	N	N
XP_861828	DNM3	dynamin-3 [Canis lupus familiaris]	2	1	1	94.8	8.65	-	-	0	-	-	0	-	-	0	170000	491000	0.3	-	-	0	-	-	0	1	N	Y	N	N
XP_013977849	DNAH12	dynein heavy chain 12, axonemal isoform X1 [Canis lupus familiaris]	1	1	1	453.8	5.86	-	-	0	-	-	0	-	-	0	-	-	0	515000	504000	1	-	-	0	1	N	Y	N	N
XP_013969021	DNAH2	dynein heavy chain 2, axonemal [Canis lupus familiaris]	0	1	1	517.4	6.29	-	-	0	-	-	0	ID only	425000	0.5	-	-	0	-	-	0	-	-	0	1	N	Y	N	N
XP_863417	LOC609233; DYNLL1	dynein light chain 1, cytoplasmic [Canis lupus familiaris]	53	4	2	10.4	7.4	ID only	ID only	1	-	-	0	342000	170000	2	-	-	0	-	-	0	-	-	0	2	N	Y	N	N
XP_022278895	DYNLL2	dynein light chain 2, cytoplasmic isoform X1 [Canis lupus familiaris]	34	9	8	11.9	7.49	30200000	5190000	5.8	361000	67200	5.4	17900000	6570000	2.7	648000	405000	1.6	33500000	17700000	1.9	641000	402000	1.6	3	Y	Y	N	N
NP_001003001	DYNLT3	dynein light chain Tctex-type 3 [Canis lupus familiaris]	15	1	1	13.1	5.38	ID only	ID only	1	-	-	0	65500	ID only	10	-	-	0	209000	102000	2.1	-	-	0	3	Y	Y	N	N
XP_022262463	ARIH2	E3 ubiquitin-protein ligase ARIH2 isoform X1 [Canis lupus familiaris]	3	1	1	61.7	5.91	ID only	ID only	1	-	-	0	68700	55300	1.2	-	-	0	91900	62700	1.5	-	-	0	3	N	Y	N	N
XP_005621803	STUB1	E3 ubiquitin-protein ligase CHIP [Canis lupus familiaris]	6	1	1	27.1	5.2	243000	96400	2.5	-	-	0	-	-	0	-	-	0	-	-	0	-	-	0	1	N	Y	N	N
XP_850301	HECTD1	E3 ubiquitin-protein ligase HECTD1 [Canis lupus familiaris]	1	1	1	289.2	5.34	-	-	0	-	-	0	-	-	0	77700	39600	2	-	-	0	-	-	0	1	N	Y	N	N
XP_005629133	HECTD3	E3 ubiquitin-protein ligase HECTD3 isoform X1 [Canis lupus familiaris]	5	3	3	97	6.25	-	-	0	37800	15100	2.5	-	-	0	393000	261000	1.5	-	-	0	149000	199000	0.8	3	N	Y	N	N
XP_013966998	HUWE1	E3 ubiquitin-protein ligase HUWE1 isoform X1 [Canis lupus familiaris]	0	1	1	487.6	5.21	-	-	0	-	-	0	-	-	0	ID only	ID only	1	-	-	0	-	-	0	1	N	Y	N	N
XP_022259677	RNF170	E3 ubiquitin-protein ligase RNF170 isoform X1 [Canis lupus familiaris]	7	1	1	29.7	5.59	-	-	0	-	-	0	-	-	0	54300	32800	1.7	-	-	0	92800	52400	1.8	2	N	Y	N	N
XP_013971378	TRIM9	E3 ubiquitin-protein ligase TRIM9 isoform X10 [Canis lupus familiaris]	4	1	1	89.4	7.09	-	-	0	-	-	0	-	-	0	ID only	ID only	1	-	-	0	-	-	0	1	N	N	N	N
XP_005617954	UBR4	E3 ubiquitin-protein ligase UBR4 isoform X1 [Canis lupus familiaris]	1	2	2	577.2	6.04	-	-	0	76600	15800	4.8	43200	17500	2.5	89400	29800	3	-	-	0	112000	23800	4.7	3	Y	Y	N	N
XP_003432617	EML2	echinoderm microtubule-associated protein-like 2 isoform X1 [Canis lupus familiaris]	9	20	20	91.6	6.98	7100000	3150000	2.3	78300	28200	2.8	68900000	37500000	1.8	447000	214000	2.1	88800000	62900000	1.4	735000	356000	2.1	3	Y	Y	N	N
XP_542683	ENTPD6	ectonucleoside triphosphate diphosphohydrolase 6 isoform X1 [Canis lupus familiaris]	8	3	3	50.2	7.97	975000	11800	82.7	-	-	0	730000	111000	6.6	-	-	0	753000	102000	7.4	-	-	0	3	Y	N	N	N
XP_538945	ENPP5	ectonucleotide pyrophosphatase/phosphodiesterase family member 5 [Canis lupus familiaris]	3	1	1	54.7	5.99	-	-	0	-	-	0	-	-	0	-	-	0	1460000	ID only	10	-	-	0	1	N	N	N	N
XP_005622908	LOC100855933; EPG5	ectopic P granules protein 5 homolog [Canis lupus familiaris]	1	1	1	291.4	6.48	-	-	0	-	-	0	-	-	0	98600	138000	0.7	-	-	0	-	-	0	1	N	Y	N	N
XP_013966863	EFHD2	EF-hand domain-containing protein D2 [Canis lupus familiaris]	10	6	6	14.4	6.05	4250000	1110000	3.8	85700	27400	3.1	1500000	456000	3.3	320000	116000	2.7	7230000	3540000	2	443000	240000	1.8	3	Y	Y	N	N
XP_005626176	EFEMP1	EGF-containing fibulin-like extracellular matrix protein 1 [Canis lupus familiaris]	7	3	3	55.2	5.02	130000	ID only	10	-	-	0	756000	20200	37.5	-	-	0	ID only	ID only	1	-	-	0	3	Y	Y	N	N
XP_022261362	EHBP1L1	EH domain-binding protein 1-like protein 1 isoform X1 [Canis lupus familiaris]	4	4	4	156	4.89	ID only	ID only	1	ID only	ID only	1	171000	ID only	10	ID only	ID only	1	352000	137000	2.6	ID only	ID only	1	3	Y	Y	N	N
XP_005631565	EHD1	EH domain-containing protein 1 isoform X1 [Canis lupus familiaris]	20	10	2	63.5	6.76	-	-	0	-	-	0	-	-	0	-	-	0	-	-	0	81900	46200	1.8	1	N	Y	N	N
XP_541532	EHD2	EH domain-containing protein 2 [Canis lupus familiaris]	2	1	1	61.2	6.46	-	-	0	-	-	0	-	-	0	-	-	0	-	-	0	366000	182000	2	1	N	N	N	N
XP_853995	EHD3	EH domain-containing protein 3 [Canis lupus familiaris]	61	25	21	60.9	6.67	20000000	3060000	6.6	3230000	1770000	1.8	31500000	8360000	3.8	24600000	15600000	1.6	47100000	22900000	2.1	24500000	20800000	1.2	3	Y	Y	Y	N
XP_851017	EHD4	EH domain-containing protein 4 [Canis lupus familiaris]	38	14	12	61.2	6.76	853000	477000	1.8	1950000	821000	2.4	761000	216000	3.5	4580000	2450000	1.9	624000	1130000	0.6	8630000	6300000	1.4	3	N	Y	N	N
XP_853387	ETFA	electron transfer flavoprotein subunit alpha, mitochondrial [Canis lupus familiaris]	9	2	2	35	8.54	-	-	0	ID only	ID only	1	ID only	ID only	1	-	-	0	ID only	ID only	1	ID only	ID only	1	3	N	Y	N	N
XP_022278736	ETFB	electron transfer flavoprotein subunit beta isoform X2 [Canis lupus familiaris]	14	3	3	33.5	7.71	ID only	ID only	1	189000	34700	5.4	677000	210000	3.2	275000	174000	1.6	522000	153000	3.4	380000	272000	1.4	3	Y	Y	N	N
XP_005618552	EEF1A1; LOC102156596; LOC102155289	elongation factor 1-alpha 1 [Canis lupus familiaris]	15	5	5	50.1	9.01	2600000	384000	6.8	940000	214000	4.4	-	-	0	1640000	977000	1.7	835000	724000	1.2	884000	393000	2.3	3	Y	Y	N	N
XP_536040	EEF1B2	elongation factor 1-beta [Canis lupus familiaris]	14	6	6	24.8	4.73	57400	6930	8.3	-	-	0	5650000	3560000	1.6	231000	91400	2.5	12500000	7820000	1.6	204000	162000	1.3	3	N	Y	N	N
XP_022282560	EEF1D; LOC475115	elongation factor 1-delta isoform X1 [Canis lupus familiaris]	8	3	3	69.6	6.93	ID only	ID only	1	309000	233000	1.3	-	-	0	1340000	615000	2.2	310000	149000	2.1	2010000	1140000	1.8	3	N	Y	N	N
XP_853577	EEF1G	elongation factor 1-gamma [Canis lupus familiaris]	11	12	12	50.1	6.74	30300000	5230000	5.8	634000	388000	1.6	20100000	7530000	2.7	1930000	1160000	1.7	31000000	16300000	1.9	1770000	1210000	1.5	3	Y	Y	N	N
XP_533949	EEF2	elongation factor 2 [Canis lupus familiaris]	9	4	4	95.3	6.83	-	-	0	-	-	0	ID only	ID only	1	-	-	0	103000	107000	1	-	-	0	2	N	Y	N	N
XP_536924	TUFM	elongation factor Tu, mitochondrial [Canis lupus familiaris]	4	1	1	49.4	7.37	-	-	0	-	-	0	-	-	0	36300	25200	1.4	-	-	0	-	-	0	1	N	Y	N	N
XP_850111	EFTUD1; EFL1	elongation factor-like GTPase 1 [Canis lupus familiaris]	4	1	1	126	6.21	-	-	0	-	-	0	128000	46700	2.7	-	-	0	430000	ID only	10	-	-	0	2	Y	Y	N	N
XP_013970154	TCEB2; LOC479873; ELOB	elongin-B [Canis lupus familiaris]	44	4	4	12.6	5.12	-	-	0	-	-	0	123000	82800	1.5	-	-	0	396000	212000	1.9	-	-	0	2	N	Y	N	N
XP_022267945		elongin-C [Canis lupus familiaris]	30	2	2	12.5	4.78	266000	6950	38.3	-	-	0	171000	129000	1.3	-	-	0	ID only	ID only	1	-	-	0	3	N	Y	N	N
XP_003432201	EMILIN1	EMILIN-1, partial [Canis lupus familiaris]	41	31	31	106.6	5.29	300000	201000	1.5	32000000	4650000	6.9	6850000	2250000	3	73800000	23800000	3.1	10300000	4830000	2.1	63900000	24100000	2.7	3	Y	Y	Y	N
XP_005633400	ENDOD1	endonuclease domain-containing 1 protein [Canis lupus familiaris]	4	3	3	75	8.95	164000	93300	1.8	102000	99300	1	484000	280000	1.7	525000	537000	1	1260000	572000	2.2	1110000	800000	1.4	3	N	Y	Y	N
XP_013970328	SH3GLB1	endophilin-B1 isoform X1 [Canis lupus familiaris]	17	3	3	38.3	6.57	ID only	ID only	1	24000	12500	1.9	657000	110000	6	184000	108000	1.7	1550000	630000	2.5	1010000	645000	1.6	3	Y	Y	N	N
XP_022272410	ERAP1	endoplasmic reticulum aminopeptidase 1 [Canis lupus familiaris]	5	3	3	107.2	5.68	-	-	0	-	-	0	-	-	0	-	-	0	584000	372000	1.6	-	-	0	1	N	Y	N	N
XP_537786	MAN1B1; LOC480667	endoplasmic reticulum mannosyl-oligosaccharide 1,2-alpha-mannosidase [Canis lupus familiaris]	7	3	3	75.2	8.32	-	-	0	-	-	0	439000	45800	9.6	-	-	0	ID only	ID only	1	-	-	0	2	N	Y	N	N
XP_022266506	ERP29	endoplasmic reticulum resident protein 29 [Canis lupus familiaris]	8	7	7	41	9.03	3860000	1990000	1.9	277000	44400	6.2	11100000	7640000	1.5	156000	110000	1.4	18100000	11800000	1.5	208000	178000	1.2	3	N	Y	N	N
XP_022280731	ERP44	endoplasmic reticulum resident protein 44 [Canis lupus familiaris]	12	3	2	47.1	6.62	117000	27300	4.3	-	-	0	289000	105000	2.7	-	-	0	894000	763000	1.2	-	-	0	3	Y	Y	N	N
NP_001003327	HSP90B1	endoplasmin precursor [Canis lupus familiaris]	20	29	27	92.5	4.87	25900000	25600000	1	2740000	1390000	2	57400000	45000000	1.3	9920000	8490000	1.2	94200000	74900000	1.3	12700000	9980000	1.3	3	N	Y	Y	N
XP_544119	LACTB2	endoribonuclease LACTB2 isoform X1 [Canis lupus familiaris]	17	3	3	32.6	6.58	236000	79500	3	-	-	0	406000	314000	1.3	-	-	0	840000	438000	1.9	-	-	0	3	N	Y	N	N
XP_546427	ESAM	endothelial cell-selective adhesion molecule isoform X1 [Canis lupus familiaris]	4	3	3	41.2	9.69	343000	ID only	10	-	-	0	62700	11700	5.4	-	-	0	1230000	20300	60.6	401000	110000	3.7	3	Y	Y	Y	N
XP_537793	EDF1	endothelial differentiation-related factor 1 [Canis lupus familiaris]	10	1	1	16.4	9.95	-	-	0	-	-	0	92200	32500	2.8	-	-	0	168000	70400	2.4	-	-	0	2	Y	Y	N	N
XP_005635189	ELMO2	engulfment and cell motility protein 2 isoform X1 [Canis lupus familiaris]	5	3	3	83.9	5.88	-	-	0	-	-	0	-	-	0	ID only	ID only	1	-	-	0	153000	71100	2.2	2	N	Y	N	N
XP_013965470	ENOPH1	enolase-phosphatase E1 isoform X1 [Canis lupus familiaris]	11	2	2	26.4	4.88	166000	52600	3.2	-	-	0	375000	188000	2	-	-	0	1190000	555000	2.1	-	-	0	3	Y	Y	N	N
XP_005622144	ECI1	enoyl-CoA delta isomerase 1, mitochondrial [Canis lupus familiaris]	4	1	1	43.7	9.57	-	-	0	-	-	0	ID only	ID only	1	-	-	0	175000	265000	0.7	ID only	ID only	1	2	N	Y	N	N
XP_537945	ECHS1	enoyl-CoA hydratase, mitochondrial [Canis lupus familiaris]	19	4	4	37.9	8.07	562000	180000	3.1	ID only	ID only	1	166000	71300	2.3	231000	118000	2	388000	244000	1.6	217000	103000	2.1	3	Y	Y	N	N
XP_849150	EFNB1	ephrin-B1 [Canis lupus familiaris]	6	2	2	34.7	9	587000	132000	4.5	ID only	ID only	1	1320000	415000	3.2	135000	93300	1.5	1340000	573000	2.3	ID only	ID only	1	3	Y	Y	N	N
XP_532580	EPS15	epidermal growth factor receptor substrate 15 [Canis lupus familiaris]	3	4	4	64.8	4.46	ID only	ID only	1	-	-	0	435000	358000	1.2	ID only	ID only	1	1420000	948000	1.5	ID only	ID only	1	3	N	Y	N	N
NP_001003242	NPC2	epididymal secretory protein E1 precursor [Canis lupus familiaris]	9	1	1	16.1	8.02	-	-	0	-	-	0	157000	18800	8.4	-	-	0	279000	13400	20.9	-	-	0	2	Y	Y	N	N
XP_005617944	EMC1	ER membrane protein complex subunit 1 isoform X1 [Canis lupus familiaris]	1	1	1	112	7.8	872000	473000	1.8	-	-	0	9540000	4780000	2	-	-	0	-	-	0	-	-	0	2	N	Y	N	N
XP_013964253	LOC100856182; ERBB2IP; ERBIN	erbin [Canis lupus familiaris]	4	3	3	163.1	5.66	-	-	0	-	-	0	-	-	0	ID only	ID only	1	-	-	0	ID only	ID only	1	2	N	Y	N	N
XP_005629927	ERLIN2	erlin-2 isoform X1 [Canis lupus familiaris]	7	2	2	39.3	5.4	-	-	0	-	-	0	-	-	0	-	-	0	-	-	0	77000	11300	6.8	1	N	Y	N	N
XP_547813	ERO1L; ERO1A	ERO1-like protein alpha [Canis lupus familiaris]	3	2	2	54.3	6.35	556000	219000	2.5	ID only	11100	0.5	537000	421000	1.3	ID only	ID only	1	992000	720000	1.4	71900	86700	0.8	3	N	Y	N	N
NP_001136142	STOM	erythrocyte band 7 integral membrane protein [Canis lupus familiaris]	36	9	9	31.2	7.21	-	-	0	2740000	783000	3.5	-	-	0	5440000	2290000	2.4	ID only	ID only	1	16200000	7060000	2.3	3	Y	Y	Y	N
XP_851181	EPB42	erythrocyte membrane protein band 4.2 isoform X1 [Canis lupus familiaris]	11	9	8	81.7	7.03	-	-	0	-	-	0	-	-	0	2020000	1110000	1.8	-	-	0	893000	463000	1.9	2	N	N	N	N
XP_022268983	C31H21orf33	ES1 protein homolog, mitochondrial [Canis lupus familiaris]	17	3	3	31.7	8.94	-	-	0	-	-	0	1780000	1410000	1.3	-	-	0	1650000	1550000	1.1	-	-	0	2	N	Y	N	N
XP_005633417	C21H11orf54	ester hydrolase C11orf54 homolog isoform X1 [Canis lupus familiaris]	5	2	2	36.3	7.03	-	-	0	-	-	0	597000	465000	1.3	-	-	0	316000	152000	2.1	-	-	0	2	N	Y	N	N
XP_854028	OVCA2	esterase OVCA2 [Canis lupus familiaris]	11	2	2	28.6	6.9	-	-	0	-	-	0	-	-	0	-	-	0	1220000	900000	1.4	-	-	0	1	N	Y	N	N
NP_001238871	EIF4A1	eukaryotic initiation factor 4A-I [Canis lupus familiaris]	44	14	12	46.1	5.48	18200000	2900000	6.3	849000	447000	1.9	12100000	4200000	2.9	3450000	2230000	1.5	26100000	14400000	1.8	3760000	3610000	1	3	Y	Y	N	N
XP_860499	EIF4A2	eukaryotic initiation factor 4A-II [Canis lupus familiaris]	37	10	4	46.4	5.48	1970000	485000	4.1	-	-	0	1420000	489000	2.9	-	-	0	3090000	1570000	2	-	-	0	3	Y	Y	N	N
XP_005621588	GSPT1	eukaryotic peptide chain release factor GTP-binding subunit ERF3A isoform X1 [Canis lupus familiaris]	4	3	3	55.7	5.55	ID only	ID only	1	-	-	0	843000	165000	5.1	ID only	ID only	1	710000	488000	1.5	112000	34600	3.2	3	N	Y	N	N
XP_013973142	ETF1	eukaryotic peptide chain release factor subunit 1 isoform X1 [Canis lupus familiaris]	15	4	4	51.6	5.62	822000	56700	14.5	-	-	0	773000	ID only	10	-	-	0	2100000	1060000	2	-	-	0	3	Y	Y	N	N
XP_854509	EIF1AX; LOC611715	eukaryotic translation initiation factor 1A, X-chromosomal [Canis lupus familiaris]	19	2	2	16.5	5.24	-	-	0	-	-	0	911000	456000	2	-	-	0	2190000	644000	3.4	-	-	0	2	Y	N	N	N
XP_005623592	EIF2S1	eukaryotic translation initiation factor 2 subunit 1 [Canis lupus familiaris]	23	9	9	36.1	5.08	15100	1200	12.6	-	-	0	319000	159000	2	125000	89100	1.4	844000	279000	3	312000	101000	3.1	3	Y	Y	N	N
XP_537983	EIF2S3	eukaryotic translation initiation factor 2 subunit 3 [Canis lupus familiaris]	3	1	1	51	8.4	202000	25900	7.8	ID only	ID only	1	303000	71500	4.2	224000	90700	2.5	436000	294000	1.5	292000	131000	2.2	3	Y	Y	N	N
XP_534306	EIF2A	eukaryotic translation initiation factor 2A isoform X1 [Canis lupus familiaris]	6	3	3	65.1	8.95	-	-	0	-	-	0	303000	134000	2.3	-	-	0	465000	260000	1.8	-	-	0	2	N	Y	N	N
XP_852131	EIF3A	eukaryotic translation initiation factor 3 subunit A isoform X1 [Canis lupus familiaris]	1	1	1	162.9	6.74	-	-	0	ID only	ID only	1	-	-	0	163000	28800	5.7	-	-	0	ID only	ID only	1	3	N	Y	N	N
XP_536894	EIF3B	eukaryotic translation initiation factor 3 subunit B [Canis lupus familiaris]	2	1	1	89.1	4.98	ID only	ID only	1	-	-	0	265000	203000	1.3	374000	187000	2	435000	445000	1	412000	190000	2.2	3	Y	Y	N	N
XP_536923	EIF3C; LOC479795	eukaryotic translation initiation factor 3 subunit C [Canis lupus familiaris]	6	5	5	105.4	5.72	-	-	0	ID only	ID only	1	-	-	0	599000	261000	2.3	-	-	0	1310000	751000	1.7	3	N	Y	N	N
XP_850595	EIF3D	eukaryotic translation initiation factor 3 subunit D [Canis lupus familiaris]	3	1	1	63.9	6.05	-	-	0	23700	11100	2.1	-	-	0	-	-	0	-	-	0	407000	209000	1.9	2	N	Y	N	N
XP_532304	EIF3E	eukaryotic translation initiation factor 3 subunit E [Canis lupus familiaris]	14	4	4	52.2	6.04	-	-	0	ID only	ID only	1	ID only	ID only	1	901000	320000	2.8	ID only	ID only	1	1080000	562000	1.9	3	N	Y	N	N
XP_534044	EIF3F	eukaryotic translation initiation factor 3 subunit F [Canis lupus familiaris]	20	5	5	37.2	6.11	-	-	0	119000	73700	1.6	ID only	ID only	1	630000	288000	2.2	ID only	ID only	1	1040000	599000	1.7	3	N	Y	N	N
XP_532315	EIF3H	eukaryotic translation initiation factor 3 subunit H [Canis lupus familiaris]	12	3	3	39.9	6.61	-	-	0	-	-	0	-	-	0	350000	61000	5.7	ID only	ID only	1	457000	245000	1.9	2	N	Y	N	N
XP_535328	EIF3I	eukaryotic translation initiation factor 3 subunit I [Canis lupus familiaris]	19	3	3	36.4	5.64	-	-	0	-	-	0	-	-	0	456000	59500	7.7	326000	228000	1.4	379000	159000	2.4	2	Y	Y	N	N
XP_544656	EIF3J	eukaryotic translation initiation factor 3 subunit J [Canis lupus familiaris]	5	1	1	29.1	4.83	-	-	0	-	-	0	ID only	ID only	1	-	-	0	-	-	0	-	-	0	1	N	Y	N	N
XP_533679	EIF3K	eukaryotic translation initiation factor 3 subunit K [Canis lupus familiaris]	7	1	1	25.1	4.93	-	-	0	-	-	0	343000	129000	2.6	ID only	ID only	1	578000	210000	2.8	692000	287000	2.4	2	Y	Y	N	N
NP_001238869	EIF3L	eukaryotic translation initiation factor 3 subunit L [Canis lupus familiaris]	13	5	5	66.7	6.34	ID only	ID only	1	60100	31200	1.9	ID only	ID only	1	827000	458000	1.8	ID only	ID only	1	1150000	646000	1.8	3	N	Y	N	N
XP_022261063	EIF3M	eukaryotic translation initiation factor 3 subunit M isoform X1 [Canis lupus familiaris]	8	2	2	42.6	6.39	-	-	0	-	-	0	-	-	0	166000	54700	3	-	-	0	ID only	ID only	1	2	N	Y	N	N
XP_013965828	EIF4G1	eukaryotic translation initiation factor 4 gamma 1 [Canis lupus familiaris]	2	1	1	164.2	5.34	-	-	0	-	-	0	-	-	0	-	-	0	141000	43500	3.2	-	-	0	1	N	Y	N	N
XP_022263676	LOC100855511; EIF4G2	eukaryotic translation initiation factor 4 gamma 2 [Canis lupus familiaris]	2	2	2	133.2	9.48	208000	ID only	10	-	-	0	-	-	0	-	-	0	ID only	ID only	1	-	-	0	2	N	Y	N	N
XP_005636844	EIF4B	eukaryotic translation initiation factor 4B isoform X1 [Canis lupus familiaris]	3	2	2	69.7	5.73	ID only	ID only	1	-	-	0	959000	427000	2.2	ID only	187000	0.5	1120000	987000	1.1	-	-	0	3	N	Y	N	N
XP_005639274	EIF4E	eukaryotic translation initiation factor 4E isoform X1 [Canis lupus familiaris]	11	2	2	26.5	7.42	ID only	ID only	1	-	-	0	2030000	937000	2.2	-	-	0	1210000	281000	4.3	-	-	0	3	Y	Y	N	N
XP_549448	EIF4EBP1	eukaryotic translation initiation factor 4E-binding protein 1 [Canis lupus familiaris]	16	1	1	12.5	5.17	-	-	0	-	-	0	89500	66700	1.3	-	-	0	182000	95400	1.9	-	-	0	2	N	N	N	N
XP_013969604	EIF4H	eukaryotic translation initiation factor 4H [Canis lupus familiaris]	5	2	2	28.3	7.39	-	-	0	-	-	0	90400	566000	0.2	-	-	0	77600	ID only	10	-	-	0	2	N	Y	N	N
XP_013971639	EIF5	eukaryotic translation initiation factor 5 [Canis lupus familiaris]	10	4	4	49	5.58	ID only	ID only	1	-	-	0	1580000	475000	3.3	-	-	0	3140000	1690000	1.9	-	-	0	3	N	Y	N	N
XP_005620027	EIF5A	eukaryotic translation initiation factor 5A-1 [Canis lupus familiaris]	51	10	10	16.8	5.24	14800000	4030000	3.7	209000	92700	2.3	17000000	9080000	1.9	129000	70800	1.8	29200000	10100000	2.9	-	-	0	3	Y	Y	Y	N
XP_013962478	EIF6	eukaryotic translation initiation factor 6 isoform X1 [Canis lupus familiaris]	19	4	4	32.4	5.43	ID only	ID only	1	-	-	0	801000	276000	2.9	-	-	0	1450000	484000	3	-	-	0	3	Y	Y	N	N
XP_531851	ETAA1	ewing's tumor-associated antigen 1 isoform X1 [Canis lupus familiaris]	4	1	1	100.3	8.06	-	-	0	ID only	ID only	1	-	-	0	-	-	0	-	-	0	-	-	0	1	N	N	N	N
XP_005628264	EXOC1; LOC475149	exocyst complex component 1 isoform X1 [Canis lupus familiaris]	1	1	1	104.9	6.67	-	-	0	-	-	0	-	-	0	-	-	0	-	-	0	83800	40300	2.1	1	N	Y	N	N
XP_022278179	EXOC3L4	exocyst complex component 3-like protein 4 [Canis lupus familiaris]	6	3	3	83	6.89	-	-	0	35700	12200	2.9	-	-	0	497000	271000	1.8	-	-	0	472000	299000	1.6	3	N	Y	N	N
XP_539369	EXOC4	exocyst complex component 4 isoform X1 [Canis lupus familiaris]	2	1	1	110.6	6.46	-	-	0	-	-	0	ID only	ID only	1	ID only	ID only	1	-	-	0	-	-	0	1	N	Y	N	N
XP_005626195	XPO1	exportin-1 isoform X1 [Canis lupus familiaris]	3	3	3	123.1	6.11	-	-	0	-	-	0	417000	150000	2.8	ID only	ID only	1	466000	253000	1.8	-	-	0	2	N	Y	N	N
XP_005635206	CSE1L	exportin-2 [Canis lupus familiaris]	12	9	9	110.5	5.71	50000	42800	1.2	-	-	0	1140000	648000	1.8	-	-	0	3980000	2450000	1.6	-	-	0	3	N	Y	N	N
XP_022265659	XPO4	exportin-4 isoform X3 [Canis lupus familiaris]	1	1	1	129.5	5.1	-	-	0	-	-	0	-	-	0	-	-	0	-	-	0	18200	36100	0.5	1	N	Y	N	N
XP_013963011	XPO7	exportin-7 isoform X1 [Canis lupus familiaris]	1	2	2	124.9	6.42	-	-	0	-	-	0	ID only	ID only	1	-	-	0	ID only	ID only	1	ID only	ID only	1	2	N	Y	N	N
XP_022280580	ESYT1	extended synaptotagmin-1 [Canis lupus familiaris]	6	4	4	129.3	8.13	301000	89100	3.4	147000	56900	2.6	473000	148000	3.2	678000	448000	1.5	97300	86100	1.1	1440000	1150000	1.3	3	Y	Y	N	N
XP_005629776	ESYT2	extended synaptotagmin-2 [Canis lupus familiaris]	1	1	1	101.7	8.78	-	-	0	-	-	0	-	-	0	-	-	0	382000	62500	6.1	161000	70800	2.3	1	N	Y	N	N
XP_851014	ECM1	extracellular matrix protein 1 [Canis lupus familiaris]	31	17	17	60.7	6.87	1090000	194000	5.6	3950000	138000	28.6	31100000	4090000	7.6	7770000	647000	12	110000000	14500000	7.6	16400000	1810000	9.1	3	Y	Y	Y	Y
NP_001273918	EZR	ezrin [Canis lupus familiaris]	32	15	8	69.4	6.1	152000	85000	1.8	-	-	0	3130000	2530000	1.2	ID only	ID only	1	4100000	2920000	1.4	-	-	0	3	N	Y	N	N
XP_533066	CAPZA1	F-actin-capping protein subunit alpha-1 [Canis lupus familiaris]	55	15	13	33	5.82	19700000	7270000	2.7	830000	226000	3.7	51600000	24800000	2.1	4110000	1850000	2.2	113000000	61100000	1.8	9580000	6240000	1.5	3	Y	Y	Y	N
NP_001013013	CAPZA2	F-actin-capping protein subunit alpha-2 [Canis lupus familiaris]	38	12	10	33	5.85	1070000	524000	2	48100	6970	6.9	15000000	7350000	2	1210000	423000	2.9	33600000	16200000	2.1	1940000	1030000	1.9	3	Y	Y	N	N
XP_022269683	CAPZB	F-actin-capping protein subunit beta isoform X3 [Canis lupus familiaris]	37	11	11	34.4	6.06	13000000	5830000	2.2	1000000	641000	1.6	-	-	0	5290000	2900000	1.8	-	-	0	5990000	3760000	1.6	3	N	Y	Y	N
XP_005617941	CAPZB	F-actin-capping protein subunit beta isoform X4 [Canis lupus familiaris]	59	16	16	33.7	6.43	-	-	0	-	-	0	46900000	18100000	2.6	-	-	0	77500000	40700000	1.9	-	-	0	2	N	Y	N	N
XP_022281474	MICAL1	F-actin-methionine sulfoxide oxidase MICAL1, partial [Canis lupus familiaris]	7	6	6	116	6.57	11200	8210	1.4	129000	46100	2.8	816000	330000	2.5	1450000	570000	2.6	961000	483000	2	1920000	1060000	1.8	3	Y	Y	N	N
XP_849256	FBXO3	F-box only protein 3 [Canis lupus familiaris]	11	3	3	54.5	5	-	-	0	-	-	0	ID only	ID only	1	-	-	0	126000	ID only	10	-	-	0	2	N	N	N	N
XP_022260535	FBXO41	F-box only protein 41 [Canis lupus familiaris]	1	1	1	93.8	8.31	-	-	0	-	-	0	-	-	0	-	-	0	-	-	0	16200	41800	0.4	1	N	N	N	N
XP_855369	NCCRP1	F-box only protein 50 [Canis lupus familiaris]	20	4	4	29.9	5.52	-	-	0	-	-	0	2230000	880000	2.5	-	-	0	-	-	0	-	-	0	1	N	N	N	N
XP_005622833	FLAD1	FAD synthase isoform X1 [Canis lupus familiaris]	4	1	1	54	5.82	-	-	0	-	-	0	ID only	ID only	1	-	-	0	-	-	0	-	-	0	1	N	Y	N	N
XP_013970815	FDPS	farnesyl pyrophosphate synthase isoform X1 [Canis lupus familiaris]	19	5	5	53.3	7.75	899000	256000	3.5	-	-	0	2540000	1990000	1.3	127000	36600	3.5	7580000	5340000	1.4	-	-	0	3	N	Y	N	N
XP_022260832	FADD	FAS-associated death domain protein [Canis lupus familiaris]	7	1	1	18.8	7.99	-	-	0	-	-	0	-	-	0	-	-	0	33400	ID only	10	-	-	0	1	N	Y	N	N
XP_546998	FSCN1	fascin [Canis lupus familiaris]	19	5	5	54.6	7.23	480000	58900	8.1	-	-	0	243000	152000	1.6	-	-	0	2840000	1280000	2.2	-	-	0	3	Y	N	N	N
XP_005624202	FASN	fatty acid synthase [Canis lupus familiaris]	4	9	9	268.9	6.44	22900	43700	0.5	219000	108000	2	1660000	1230000	1.3	987000	596000	1.7	2600000	2560000	1	1900000	1020000	1.9	3	N	Y	N	N
XP_022268092	FABP5	fatty acid-binding protein, epidermal isoform X1 [Canis lupus familiaris]	47	5	5	17.3	7.72	ID only	9300	0.5	ID only	ID only	1	912000	337000	2.7	-	-	0	3400000	929000	3.7	-	-	0	3	Y	Y	N	N
XP_005617722	FABP3	fatty acid-binding protein, heart [Canis lupus familiaris]	26	4	4	14.8	6.79	1220000	121000	10.1	-	-	0	1880000	632000	3	-	-	0	2770000	1510000	1.8	-	-	0	3	Y	N	N	N
XP_539627	FAAH; LOC482510	fatty-acid amide hydrolase 1 isoform X1 [Canis lupus familiaris]	2	1	1	62.7	7.44	-	-	0	-	-	0	-	-	0	ID only	ID only	1	-	-	0	-	-	0	1	N	N	N	N
XP_022282395	FER1L6	fer-1-like protein 6 [Canis lupus familiaris]	1	1	1	208.8	6.19	-	-	0	-	-	0	ID only	ID only	1	-	-	0	-	-	0	-	-	0	1	N	N	N	N
XP_022263809	FARP1	FERM, RhoGEF and pleckstrin domain-containing protein 1 isoform X1 [Canis lupus familiaris]	2	1	1	117.7	7.9	-	-	0	-	-	0	-	-	0	ID only	ID only	1	-	-	0	-	-	0	1	N	N	N	N
XP_022278158	FERMT2	fermitin family homolog 2 [Canis lupus familiaris]	2	2	2	74.9	6.84	452000	309000	1.5	401000	139000	2.9	1790000	526000	3.4	953000	392000	2.4	9630000	6080000	1.6	4370000	2830000	1.5	3	Y	Y	N	N
XP_003639703	FERMT3	fermitin family homolog 3 [Canis lupus familiaris]	66	36	36	75.3	6.95	101000000	54200000	1.9	53200000	19700000	2.7	282000000	95000000	3	189000000	93200000	2	596000000	360000000	1.7	306000000	205000000	1.5	3	Y	Y	Y	N
NP_001003080	FTH1	ferritin heavy chain [Canis lupus familiaris]	27	7	7	21.3	5.88	2000000	1770000	1.1	791000	454000	1.7	11300000	10500000	1.1	7590000	3720000	2	6500000	4090000	1.6	5150000	1810000	2.8	3	Y	Y	N	N
NP_001019807	FTL; LOC102155200	ferritin light chain [Canis lupus familiaris]	34	4	4	20.1	6	1920000	1350000	1.4	709000	290000	2.4	6830000	5490000	1.2	4000000	1990000	2	11500000	4940000	2.3	4390000	1570000	2.8	3	Y	N	N	N
XP_535835	FETUB	fetuin-B [Canis lupus familiaris]	23	8	8	42.3	5.92	19400000	649000	29.9	210000	37400	5.6	3510000	548000	6.4	-	-	0	16600000	7700000	2.2	-	-	0	3	Y	N	N	N
XP_013977875	FEZF2	fez family zinc finger protein 2 [Canis lupus familiaris]	4	1	1	48.7	9.41	-	-	0	-	-	0	-	-	0	-	-	0	-	-	0	187000	153000	1.2	1	N	N	N	N
XP_005620910	FHOD1	FH1/FH2 domain-containing protein 1 isoform X4 [Canis lupus familiaris]	4	4	4	129.9	6.24	358000	13500	26.5	ID only	15200	0.5	116000	26300	4.4	170000	ID only	10	1780000	502000	3.5	278000	191000	1.5	3	Y	Y	N	N
XP_542124	FBN3	fibrillin-3 isoform X1 [Canis lupus familiaris]	1	1	1	303	5.12	-	-	0	-	-	0	-	-	0	-	-	0	-	-	0	77600	ID only	10	1	N	N	N	N
XP_532697	FGA	fibrinogen alpha chain [Canis lupus familiaris]	49	63	63	96.6	6.1	491000000	117000000	4.2	1960000000	93500000	21	1160000000	302000000	3.8	4500000000	637000000	7.1	1500000000	627000000	2.4	3920000000	645000000	6.1	3	Y	Y	Y	N
XP_005629424	FGB	fibrinogen beta chain [Canis lupus familiaris]	73	50	48	56.3	7.56	960000000	157000000	6.1	1430000000	102000000	14.1	1150000000	307000000	3.7	3570000000	508000000	7	1280000000	584000000	2.2	2820000000	491000000	5.7	3	Y	Y	Y	Y
XP_005629425	FGG	fibrinogen gamma chain isoform X1 [Canis lupus familiaris]	76	38	38	50.3	6.14	1010000000	150000000	6.7	1220000000	89000000	13.7	1060000000	218000000	4.9	3440000000	465000000	7.4	1350000000	560000000	2.4	2480000000	368000000	6.7	3	Y	Y	Y	Y
XP_850496	PKHD1L1	fibrocystin-L isoform X1 [Canis lupus familiaris]	0	1	1	469.3	6.43	-	-	0	-	-	0	-	-	0	-	-	0	-	-	0	264000	142000	1.9	1	N	Y	N	N
XP_013966464	FN1	fibronectin isoform X10 [Canis lupus familiaris]	66	108	1	248.2	5.73	-	-	0	-	-	0	-	-	0	-	-	0	-	-	0	467000	ID only	10	1	N	Y	N	N
XP_013966462	FN1	fibronectin isoform X11 [Canis lupus familiaris]	62	86	1	238.5	6.01	-	-	0	ID only	ID only	1	-	-	0	-	-	0	-	-	0	-	-	0	1	N	Y	N	N
XP_022270948	FN1	fibronectin isoform X3 [Canis lupus familiaris]	64	109	76	261.4	5.81	29500000	17300000	1.7	-	-	0	-	-	0	-	-	0	363000000	89400000	4.1	1160000000	196000000	5.9	2	N	Y	Y	N
XP_013966458	FN1	fibronectin isoform X7 [Canis lupus familiaris]	71	119	119	251.7	6.07	-	-	0	572000000	49300000	11.6	369000000	66500000	5.6	1610000000	355000000	4.5	-	-	0	-	-	0	2	Y	Y	N	N
XP_005625811	FBLN1	fibulin-1 isoform X1 [Canis lupus familiaris]	19	8	3	77.9	5.29	-	-	0	-	-	0	698000	37900	18.4	1560000	192000	8.1	2790000	549000	5.1	-	-	0	2	Y	Y	N	N
XP_005625812	FBLN1	fibulin-1 isoform X2 [Canis lupus familiaris]	8	11	7	75.2	5.31	2090000	379000	5.5	244000	2970	82.1	11500000	1760000	6.5	-	-	0	16200000	2470000	6.6	714000	73600	9.7	3	Y	Y	N	N
XP_541748	FBLN2	fibulin-2 isoform X1 [Canis lupus familiaris]	25	28	28	130.7	4.82	14000000	4920000	2.9	7680000	1180000	6.5	84200000	21900000	3.8	32400000	7860000	4.1	95100000	27300000	3.5	19600000	6560000	3	3	Y	N	N	N
XP_537350	FBLN5	fibulin-5 isoform X1 [Canis lupus familiaris]	6	2	2	50	4.65	598000	ID only	10	-	-	0	427000	ID only	10	-	-	0	477000	ID only	10	-	-	0	3	Y	Y	N	N
XP_867483	FLNA	filamin-A [Canis lupus familiaris]	74	175	170	280.5	6.11	769000000	751000000	1	514000000	140000000	3.7	2430000000	1800000000	1.4	1750000000	1230000000	1.4	4440000000	3580000000	1.2	2120000000	1210000000	1.8	3	N	Y	Y	Y
XP_539385	FLNC	filamin-C isoform X1 [Canis lupus familiaris]	2	7	3	290.2	6.01	73800	77100	1	-	-	0	745000	727000	1	-	-	0	1530000	1310000	1.2	697000	436000	1.6	3	N	Y	N	N
XP_538799	FKBP15	FK506-binding protein 15 isoform X1 [Canis lupus familiaris]	1	1	1	131.6	5.03	-	-	0	-	-	0	-	-	0	-	-	0	-	-	0	226000	35000	6.5	1	N	Y	N	N
XP_533666	BLVRB	flavin reductase (NADPH) isoform X1 [Canis lupus familiaris]	21	7	7	22.1	7.59	ID only	ID only	1	-	-	0	17800000	5760000	3.1	101000	58600	1.7	1300000	369000	3.5	-	-	0	3	Y	Y	N	N
XP_005627169	FLOT1	flotillin-1 isoform X1 [Canis lupus familiaris]	3	1	1	47.3	7.17	-	-	0	ID only	ID only	1	-	-	0	23000	25000	0.9	-	-	0	31300	27600	1.1	3	N	Y	N	N
XP_013972266	LOC100856195; FLOT2	flotillin-2 isoform X1 [Canis lupus familiaris]	4	1	1	41.6	5.29	-	-	0	ID only	10400	0.5	-	-	0	ID only	ID only	1	-	-	0	-	-	0	2	N	Y	N	N
XP_013974172	PTK2	focal adhesion kinase 1 isoform X1 [Canis lupus familiaris]	1	1	1	128.9	6.84	-	-	0	-	-	0	-	-	0	-	-	0	ID only	ID only	1	-	-	0	1	N	Y	N	N
XP_022263437	FOLR2	folate receptor beta isoform X1 [Canis lupus familiaris]	4	1	1	30.5	8.51	-	-	0	-	-	0	-	-	0	-	-	0	-	-	0	ID only	ID only	1	1	N	N	N	N
XP_866308	FHL1	four and a half LIM domains protein 1 isoform X3 [Canis lupus familiaris]	45	14	14	33.7	8.41	2750000	1030000	2.7	1160000	170000	6.8	12300000	5820000	2.1	8660000	2920000	3	18100000	13600000	1.3	8990000	3080000	2.9	3	Y	Y	Y	N
XP_005642233	FN3K	fructosamine-3-kinase [Canis lupus familiaris]	11	2	2	31.9	8.34	-	-	0	-	-	0	356000	109000	3.2	-	-	0	377000	175000	2.2	-	-	0	2	Y	Y	N	N
XP_849434	ALDOA	fructose-bisphosphate aldolase A [Canis lupus familiaris]	68	31	29	39.5	8.09	333000000	115000000	2.9	12800000	2310000	5.6	805000000	508000000	1.6	69600000	23600000	3	1150000000	834000000	1.4	75100000	34300000	2.2	3	Y	Y	Y	Y
XP_022278285	ALDOC	fructose-bisphosphate aldolase C isoform X1 [Canis lupus familiaris]	20	18	15	39.3	6.65	678000	101000	6.7	-	-	0	12000000	7030000	1.7	254000	60300	4.2	12000000	9470000	1.3	380000	135000	2.8	3	Y	Y	N	N
XP_537215	FH	fumarate hydratase, mitochondrial [Canis lupus familiaris]	37	10	10	54.4	9	2730000	480000	5.7	ID only	ID only	1	4050000	2230000	1.8	ID only	ID only	1	7220000	5330000	1.4	-	-	0	3	N	Y	N	N
XP_022273611	FYB; FYB1	FYN-binding protein [Canis lupus familiaris]	7	6	6	95.5	7.37	ID only	ID only	1	-	-	0	1380000	249000	5.6	417000	302000	1.4	4440000	1060000	4.2	728000	541000	1.3	3	Y	Y	N	N
XP_005632690	FYCO1	FYVE and coiled-coil domain-containing protein 1 isoform X1 [Canis lupus familiaris]	2	1	1	164.6	4.98	-	-	0	-	-	0	ID only	ID only	1	ID only	ID only	1	ID only	ID only	1	ID only	ID only	1	2	N	Y	N	N
XP_022278076	FGD3	FYVE, RhoGEF and PH domain-containing protein 3 [Canis lupus familiaris]	4	3	3	79.9	6.19	-	-	0	-	-	0	1760000	277000	6.4	-	-	0	1590000	761000	2.1	-	-	0	2	Y	Y	N	N
XP_005619211	GRK6	G protein-coupled receptor kinase 6 isoform X1 [Canis lupus familiaris]	2	1	1	66.7	8	-	-	0	-	-	0	-	-	0	170000	75700	2.2	-	-	0	ID only	ID only	1	2	N	Y	N	N
XP_022276380	LOC100856475; GPRC5B	G-protein coupled receptor family C group 5 member B [Canis lupus familiaris]	3	1	1	57.4	9.1	-	-	0	-	-	0	-	-	0	-	-	0	-	-	0	190000	99100	1.9	1	N	N	N	N
NP_001003104	GALK1	galactokinase [Canis lupus familiaris]	10	6	6	42.1	5.67	ID only	ID only	1	-	-	0	3140000	1850000	1.7	352000	232000	1.5	5810000	4530000	1.3	50300	55400	0.9	3	N	Y	N	N
NP_001188417	LGALS1	galectin-1 [Canis lupus familiaris]	39	5	5	14.7	4.94	12200000	1570000	7.8	173000	42300	4.1	3710000	1730000	2.2	113000	77700	1.5	4490000	2110000	2.1	-	-	0	3	Y	Y	N	N
XP_533678	ECH1; LGALS4	galectin-4 isoform X3 [Canis lupus familiaris]	9	5	5	38.5	8.05	-	-	0	-	-	0	1290000	1060000	1.2	109000	34000	3.2	1840000	1440000	1.3	364000	188000	1.9	2	N	N	N	N
XP_022280026	LOC481389; LGALSL	galectin-related protein [Canis lupus familiaris]	5	7	7	24.8	6.27	5220000	1660000	3.2	-	-	0	13100000	3670000	3.6	173000	101000	1.7	31800000	7510000	4.2	395000	439000	0.9	3	Y	Y	Y	N
XP_022274192	GABARAP	gamma-aminobutyric acid receptor-associated protein isoform X1 [Canis lupus familiaris]	10	1	1	14.7	8.31	-	-	0	-	-	0	194000	94600	2.1	-	-	0	277000	64400	4.3	-	-	0	2	Y	N	N	N
XP_005620731	GABARAPL2	gamma-aminobutyric acid receptor-associated protein-like 2 [Canis lupus familiaris]	11	1	1	13.7	8.1	384000	116000	3.3	-	-	0	-	-	0	-	-	0	-	-	0	-	-	0	1	N	Y	N	N
XP_003639985	LOC100856683; ENO2	gamma-enolase [Canis lupus familiaris]	18	5	1	47.2	5.12	-	-	0	-	-	0	-	-	0	-	-	0	ID only	ID only	1	-	-	0	1	N	Y	N	N
XP_003640062	LOC100856436; GGH	gamma-glutamyl hydrolase [Canis lupus familiaris]	19	5	5	35.6	8.02	22100	ID only	10	-	-	0	1810000	286000	6.3	-	-	0	13400000	1320000	10.2	-	-	0	3	Y	Y	Y	N
XP_854377	GGCT	gamma-glutamylcyclotransferase [Canis lupus familiaris]	12	3	3	21.1	5.47	-	-	0	-	-	0	917000	422000	2.2	-	-	0	244000	72500	3.4	-	-	0	2	Y	Y	N	N
XP_850827	NAPG	gamma-soluble NSF attachment protein isoform X1 [Canis lupus familiaris]	3	1	1	34.6	5.41	-	-	0	-	-	0	-	-	0	ID only	ID only	1	-	-	0	ID only	ID only	1	2	N	Y	N	N
NP_001070825	POFUT1	GDP-fucose protein O-fucosyltransferase 1 precursor [Canis lupus familiaris]	5	1	1	44.3	8.66	-	-	0	-	-	0	-	-	0	-	-	0	84300	38100	2.2	-	-	0	1	N	Y	N	N
XP_022282561	TSTA3	GDP-L-fucose synthase isoform X1 [Canis lupus familiaris]	8	2	2	35.8	7.17	-	-	0	-	-	0	918000	739000	1.2	-	-	0	999000	1630000	0.6	-	-	0	2	N	Y	N	N
XP_013965974	GMDS	GDP-mannose 4,6 dehydratase [Canis lupus familiaris]	9	4	4	57.9	8.81	ID only	ID only	1	-	-	0	773000	420000	1.8	ID only	ID only	1	524000	572000	0.9	-	-	0	3	N	Y	N	N
XP_022280742	GSN	gelsolin [Canis lupus familiaris]	45	36	36	88	8.15	177000000	70600000	2.5	17700000	4440000	4	1020000000	451000000	2.3	120000000	67100000	1.8	1440000000	749000000	1.9	117000000	75000000	1.6	3	Y	Y	Y	N
XP_005619318	GEMIN5	gem-associated protein 5 isoform X1 [Canis lupus familiaris]	1	1	1	167.9	6.8	-	-	0	-	-	0	-	-	0	-	-	0	ID only	ID only	1	-	-	0	1	N	Y	N	N
XP_850528	RABGGTA	geranylgeranyl transferase type-2 subunit alpha [Canis lupus familiaris]	13	5	5	65	5.81	-	-	0	-	-	0	598000	308000	1.9	-	-	0	571000	313000	1.8	-	-	0	2	N	Y	N	N
XP_005623469	LOC100856272; GMFB	glia maturation factor beta isoform X1 [Canis lupus familiaris]	35	2	1	16.8	5.29	-	-	0	-	-	0	399000	124000	3.2	-	-	0	456000	151000	3	-	-	0	2	Y	N	N	N
XP_005616657	GMFG	glia maturation factor gamma isoform X2 [Canis lupus familiaris]	52	6	5	17.8	7.83	756000	183000	4.1	-	-	0	4390000	1640000	2.7	-	-	0	8530000	3390000	2.5	-	-	0	3	Y	Y	Y	N
XP_013966585	SERPINE2	glia-derived nexin [Canis lupus familiaris]	45	21	21	43.9	9.57	280000000	6470000	43.3	32500000	2410000	13.5	194000000	9880000	19.7	95000000	10100000	9.4	367000000	33900000	10.8	142000000	17200000	8.2	3	Y	Y	N	N
XP_022277719	GNPNAT1	glucosamine 6-phosphate N-acetyltransferase [Canis lupus familiaris]	10	1	1	20.8	7.99	-	-	0	-	-	0	ID only	ID only	1	-	-	0	182000	ID only	10	-	-	0	2	N	Y	N	N
XP_005617380	GNPDA1	glucosamine-6-phosphate isomerase 1 [Canis lupus familiaris]	41	12	10	32.6	6.74	1290000	587000	2.2	529000	77900	6.8	10700000	14400000	0.7	2560000	469000	5.5	13600000	17000000	0.8	2630000	995000	2.6	3	Y	N	N	N
XP_022282660	GNPDA2	glucosamine-6-phosphate isomerase 2 isoform X1 [Canis lupus familiaris]	13	10	8	31.1	6.9	-	-	0	-	-	0	1350000	897000	1.5	223000	73500	3	1350000	970000	1.4	247000	53600	4.6	2	Y	Y	N	N
XP_542316	PGM2L1	glucose 1,6-bisphosphate synthase [Canis lupus familiaris]	4	2	2	70.4	6.87	-	-	0	-	-	0	-	-	0	-	-	0	294000	154000	1.9	-	-	0	1	N	Y	N	N
XP_005642097	G6PD	glucose-6-phosphate 1-dehydrogenase isoform X1 [Canis lupus familiaris]	3	6	6	63.6	6.7	716000	41100	17.4	-	-	0	1660000	1010000	1.6	ID only	ID only	1	1500000	1090000	1.4	ID only	ID only	1	3	N	Y	N	N
XP_853858	GPI	glucose-6-phosphate isomerase [Canis lupus familiaris]	9	24	24	62.8	7.93	74900000	17300000	4.3	222000	108000	2.1	93100000	64900000	1.4	813000	352000	2.3	131000000	102000000	1.3	755000	498000	1.5	3	Y	Y	Y	N
XP_005640103	GFOD1	glucose-fructose oxidoreductase domain-containing protein 1 [Canis lupus familiaris]	4	1	1	31.8	6.39	-	-	0	-	-	0	-	-	0	-	-	0	-	-	0	117000	81500	1.4	1	N	Y	N	N
XP_005632910	PRKCSH	glucosidase 2 subunit beta isoform X1 [Canis lupus familiaris]	2	1	1	60.5	4.46	ID only	ID only	1	-	-	0	839000	624000	1.3	ID only	ID only	1	1510000	1110000	1.4	ID only	ID only	1	3	N	Y	N	N
XP_855035	GBA	glucosylceramidase [Canis lupus familiaris]	3	1	1	59.6	7.28	-	-	0	-	-	0	-	-	0	-	-	0	338000	ID only	10	-	-	0	1	N	N	N	N
XP_013968255	GLUD1	glutamate dehydrogenase 1, mitochondrial [Canis lupus familiaris]	20	6	6	42.9	7.58	ID only	ID only	1	171000	67100	2.5	1450000	926000	1.6	1900000	980000	1.9	2260000	1880000	1.2	4180000	1600000	2.6	3	Y	Y	N	N
XP_022276404	GCLM	glutamate--cysteine ligase regulatory subunit [Canis lupus familiaris]	4	2	2	36.6	4.96	-	-	0	-	-	0	674000	223000	3	44000	14600	3	750000	329000	2.3	ID only	ID only	1	2	Y	Y	N	N
NP_001002965	GLUL	glutamine synthetase isoform 1 [Canis lupus familiaris]	9	3	3	46.8	6.74	ID only	ID only	1	ID only	ID only	1	ID only	ID only	1	93000	82000	1.1	484000	387000	1.3	ID only	ID only	1	3	N	Y	N	N
XP_022280031	GFPT1	glutamine--fructose-6-phosphate aminotransferase [isomerizing] 1 [Canis lupus familiaris]	12	5	5	78.1	7.43	-	-	0	-	-	0	-	-	0	ID only	ID only	1	ID only	ID only	1	482000	288000	1.7	2	N	Y	N	N
XP_022262459	QARS	glutamine--tRNA ligase isoform X1 [Canis lupus familiaris]	6	4	4	92.6	6.48	ID only	5960	0.5	-	-	0	56200	60200	0.9	-	-	0	203000	167000	1.2	-	-	0	3	N	Y	N	N
XP_851559	GLRX	glutaredoxin-1 [Canis lupus familiaris]	8	6	6	11.5	8.09	6590000	2130000	3.1	-	-	0	3730000	1300000	2.9	-	-	0	8950000	4420000	2	ID only	45600	0.5	3	Y	Y	N	N
XP_535061	GLRX3	glutaredoxin-3 isoform X1 [Canis lupus familiaris]	41	11	11	37.3	5.59	747000	232000	3.2	-	-	0	2820000	1380000	2.1	-	-	0	2980000	2220000	1.3	-	-	0	3	Y	Y	N	N
NP_001108591	GPX1	glutathione peroxidase 1 [Canis lupus familiaris]	9	6	6	22.3	6.55	312000	131000	2.4	ID only	ID only	1	4450000	1560000	2.9	1470000	539000	2.7	435000	193000	2.3	147000	78000	1.9	3	Y	Y	Y	N
NP_001157926	GPX3	glutathione peroxidase 3 precursor [Canis lupus familiaris]	13	5	5	25.4	8.6	2250000	209000	10.7	306000	43400	7.1	10600000	1180000	9	554000	73200	7.6	11600000	967000	12	1080000	201000	5.4	3	Y	Y	N	N
XP_532813	GSR	glutathione reductase, mitochondrial isoform X1 [Canis lupus familiaris]	28	16	16	56.1	7.93	36200000	7230000	5	860000	148000	5.8	48200000	23900000	2	2750000	710000	3.9	70100000	47100000	1.5	3080000	751000	4.1	3	Y	Y	Y	N
XP_005629585	GSTK1	glutathione S-transferase kappa 1 [Canis lupus familiaris]	19	3	3	25.5	7.99	-	-	0	ID only	ID only	1	-	-	0	ID only	ID only	1	-	-	0	181000	117000	1.5	3	N	Y	N	N
XP_535007	GSTO1	glutathione S-transferase omega-1 [Canis lupus familiaris]	5	2	2	27.4	7.69	-	-	0	-	-	0	-	-	0	-	-	0	905000	466000	1.9	-	-	0	1	N	Y	Y	N
XP_005631454	LOC476006	glutathione S-transferase P-like [Canis lupus familiaris]	19	10	7	23.7	7.87	6530000	2470000	2.6	-	-	0	4530000	2010000	2.3	2150000	975000	2.2	8450000	4690000	1.8	52400	52300	1	3	Y	Y	Y	N
NP_001239096	GSTP1	glutathione S-transferase pi 1 [Canis lupus familiaris]	30	12	9	23.5	6.77	27800000	11600000	2.4	124000	74700	1.7	96900000	48700000	2	206000	102000	2	162000000	101000000	1.6	2610000	2610000	1	3	Y	Y	N	N
XP_851615	GSS	glutathione synthetase isoform X1 [Canis lupus familiaris]	40	12	12	52.4	5.92	10200000	1090000	9.4	24500	26300	0.9	10300000	3890000	2.6	-	-	0	14200000	10800000	1.3	-	-	0	3	Y	Y	N	N
NP_001003142	GAPDH	glyceraldehyde-3-phosphate dehydrogenase [Canis lupus familiaris]	67	28	12	35.8	8.13	277000000	115000000	2.4	57800000	9290000	6.2	548000000	368000000	1.5	159000000	66200000	2.4	947000000	604000000	1.6	174000000	84900000	2.1	3	Y	Y	Y	N
XP_534639	LOC477441	glyceraldehyde-3-phosphate dehydrogenase-like [Canis lupus familiaris]	28	14	2	36.1	7.53	-	-	0	-	-	0	897000	516000	1.7	384000	204000	1.9	594000	549000	1.1	278000	424000	0.7	2	N	Y	N	N
XP_005641282	GK	glycerol kinase isoform X3 [Canis lupus familiaris]	3	1	1	63.7	5.8	-	-	0	-	-	0	-	-	0	-	-	0	303000	150000	2	-	-	0	1	N	Y	N	N
XP_542745	GPD1L	glycerol-3-phosphate dehydrogenase 1-like protein [Canis lupus familiaris]	5	2	2	38.2	6.64	-	-	0	-	-	0	-	-	0	-	-	0	103000	40100	2.6	-	-	0	1	N	Y	N	N
XP_005640453	GPD2	glycerol-3-phosphate dehydrogenase, mitochondrial [Canis lupus familiaris]	10	6	6	92.5	8.1	-	-	0	13400	11900	1.1	-	-	0	790000	852000	0.9	-	-	0	2080000	1390000	1.5	3	N	Y	N	N
NP_001274013	GATM	glycine amidinotransferase, mitochondrial [Canis lupus familiaris]	16	13	13	48.3	8.34	2980000	870000	3.4	27900	15500	1.8	3240000	1840000	1.8	81100	55000	1.5	9090000	5700000	1.6	572000	244000	2.3	3	N	Y	N	N
XP_003639538	LOC100856659; GARS	glycine--tRNA ligase isoform X1 [Canis lupus familiaris]	5	17	17	83.6	7.18	1870000	1200000	1.6	-	-	0	8090000	3830000	2.1	-	-	0	14900000	10500000	1.4	650000	152000	4.3	3	N	Y	N	N
XP_854809	GYS1	glycogen [starch] synthase, muscle [Canis lupus familiaris]	8	5	5	83.5	6.18	-	-	0	35600	29800	1.2	229000	173000	1.3	238000	53700	4.4	1340000	1090000	1.2	303000	178000	1.7	3	N	Y	N	N
NP_001041561	AGL	glycogen debranching enzyme [Canis lupus familiaris]	3	5	5	174.7	6.74	ID only	ID only	1	-	-	0	324000	301000	1.1	-	-	0	296000	490000	0.6	-	-	0	3	N	Y	N	N
XP_003433179	PYGB	glycogen phosphorylase, brain form [Canis lupus familiaris]	19	33	27	96.6	7.02	1780000	1330000	1.3	498000	185000	2.7	36000000	19200000	1.9	5370000	2310000	2.3	68800000	52500000	1.3	8450000	3680000	2.3	3	Y	Y	Y	N
NP_001274091	PYGL	glycogen phosphorylase, liver form [Canis lupus familiaris]	12	25	19	97.4	7.21	431000	373000	1.2	ID only	ID only	1	20800000	11900000	1.8	1450000	734000	2	23400000	19700000	1.2	1580000	886000	1.8	3	N	Y	N	N
XP_013972105	GSK3A	glycogen synthase kinase-3 alpha, partial [Canis lupus familiaris]	3	1	1	50.8	8.85	ID only	ID only	1	-	-	0	-	-	0	-	-	0	-	-	0	-	-	0	1	N	Y	N	N
XP_535751	GSK3B	glycogen synthase kinase-3 beta isoform X1 [Canis lupus familiaris]	14	2	2	48	8.78	ID only	ID only	1	-	-	0	ID only	ID only	1	-	-	0	390000	190000	2.1	-	-	0	3	N	Y	N	N
XP_022264440	GYG1	glycogenin-1 isoform X1 [Canis lupus familiaris]	3	4	4	41.3	5.91	-	-	0	-	-	0	1450000	1030000	1.4	428000	156000	2.7	1520000	1300000	1.2	185000	81900	2.3	2	Y	Y	N	N
NP_001103430	GYPA	glycophorin-A precursor [Canis lupus familiaris]	15	2	2	14	4.92	-	-	0	-	-	0	-	-	0	1550000	331000	4.7	-	-	0	1260000	492000	2.6	2	Y	N	N	N
XP_022261573	GYPC	glycophorin-C isoform X1 [Canis lupus familiaris]	22	1	1	13.8	8.28	-	-	0	-	-	0	-	-	0	157000	66300	2.4	-	-	0	138000	ID only	10	2	Y	N	N	N
XP_013967305	XG	glycoprotein Xg [Canis lupus familiaris]	12	1	1	21	9.36	-	-	0	37400	41500	0.9	-	-	0	69800	33500	2.1	-	-	0	65300	24900	2.6	3	Y	N	N	N
XP_537759	GLOD4	glyoxalase domain-containing protein 4 isoform X1 [Canis lupus familiaris]	52	10	10	33.5	5.48	3050000	881000	3.5	-	-	0	8670000	4690000	1.8	-	-	0	20100000	10900000	1.8	-	-	0	3	N	Y	N	N
XP_005626882	GRHPR	glyoxylate reductase/hydroxypyruvate reductase [Canis lupus familiaris]	25	5	5	34.9	6.99	-	-	0	-	-	0	1150000	749000	1.5	-	-	0	2920000	1910000	1.5	-	-	0	2	N	Y	N	N
XP_545353	GMPR	GMP reductase 1 [Canis lupus familiaris]	53	19	18	37.3	7.33	6670000	2370000	2.8	3280000	577000	5.7	6340000	8320000	0.8	4930000	1820000	2.7	33300000	28100000	1.2	11700000	4100000	2.9	3	Y	Y	N	N
XP_850127	GMPR2	GMP reductase 2 [Canis lupus familiaris]	10	5	4	38	7.02	-	-	0	-	-	0	1150000	801000	1.4	390000	72300	5.4	1670000	1390000	1.2	416000	191000	2.2	2	Y	Y	N	N
XP_536786	GLG1	Golgi apparatus protein 1 [Canis lupus familiaris]	2	2	2	134.9	6.95	67200	ID only	10	ID only	ID only	1	ID only	ID only	1	ID only	ID only	1	609000	78900	7.7	608000	ID only	10	3	Y	Y	Y	N
XP_005622687	ACBD3	Golgi resident protein GCP60 isoform X1 [Canis lupus familiaris]	4	1	1	51.5	5.27	-	-	0	-	-	0	152000	59000	2.6	-	-	0	299000	175000	1.7	-	-	0	2	N	Y	N	N
XP_005626861	LOC100856258; GLIPR2	Golgi-associated plant pathogenesis-related protein 1 isoform X1 [Canis lupus familiaris]	35	4	4	17.1	9.51	-	-	0	14200	ID only	10	-	-	0	422000	228000	1.8	-	-	0	1070000	366000	2.9	3	Y	Y	N	N
XP_540431	GRB2	growth factor receptor-bound protein 2 [Canis lupus familiaris]	17	8	8	25.2	6.32	3320000	1030000	3.2	ID only	ID only	1	4930000	3310000	1.5	93800	44500	2.1	15400000	7820000	2	393000	258000	1.5	3	Y	Y	Y	N
XP_022279735	GDF11	growth/differentiation factor 11 isoform X1 [Canis lupus familiaris]	5	2	2	32.7	9.07	-	-	0	-	-	0	-	-	0	156000	ID only	10	-	-	0	ID only	ID only	1	2	N	N	N	N
XP_544622	GCHFR	GTP cyclohydrolase 1 feedback regulatory protein [Canis lupus familiaris]	20	1	1	9.6	7.34	263000	89100	3	-	-	0	-	-	0	-	-	0	ID only	ID only	1	-	-	0	2	N	N	N	N
NP_001181913	RAN	GTP-binding nuclear protein Ran [Canis lupus familiaris]	24	6	6	24.4	7.49	2740000	401000	6.8	284000	165000	1.7	5350000	1270000	4.2	634000	433000	1.5	10100000	1130000	9	776000	645000	1.2	3	Y	Y	N	N
XP_005616012	DIRAS2	GTP-binding protein Di-Ras2 [Canis lupus familiaris]	10	1	1	22.5	8.75	-	-	0	-	-	0	-	-	0	-	-	0	-	-	0	ID only	ID only	1	1	N	N	N	N
XP_003433609	KRAS	GTPase KRas isoform X1 [Canis lupus familiaris]	12	2	1	21.4	8.12	-	-	0	-	-	0	-	-	0	-	-	0	-	-	0	306000	178000	1.7	1	N	Y	N	N
NP_001273994	NRAS	GTPase NRas [Canis lupus familiaris]	12	2	1	21.2	5.17	-	-	0	-	-	0	-	-	0	-	-	0	-	-	0	227000	97200	2.3	1	N	Y	N	N
XP_022276400	VAV3	guanine nucleotide exchange factor VAV3 [Canis lupus familiaris]	1	1	1	94.2	6.95	-	-	0	-	-	0	171000	59800	2.9	-	-	0	ID only	ID only	1	-	-	0	2	N	Y	N	N
NP_001003364	GNAI2	guanine nucleotide-binding protein G(i) subunit alpha-2 [Canis lupus familiaris]	50	15	13	40.5	5.38	6480	ID only	10	2690000	815000	3.3	1170000	470000	2.5	12700000	4060000	3.1	3010000	1650000	1.8	24600000	11400000	2.1	3	Y	Y	N	N
XP_005620396	GNB1	guanine nucleotide-binding protein G(I)/G(S)/G(T) subunit beta-1 isoform X1 [Canis lupus familiaris]	33	7	5	37.4	6	-	-	0	ID only	2330	0.5	118000	40000	3	4910000	1570000	3.1	194000	80000	2.4	6610000	2110000	3.1	3	Y	Y	N	N
XP_536861	GNB2	guanine nucleotide-binding protein G(I)/G(S)/G(T) subunit beta-2 [Canis lupus familiaris]	29	6	4	37.3	6	-	-	0	-	-	0	-	-	0	311000	88100	3.5	-	-	0	1750000	582000	3	2	Y	Y	N	N
XP_854614	GNAI3	guanine nucleotide-binding protein G(k) subunit alpha [Canis lupus familiaris]	11	5	1	40.5	5.69	-	-	0	-	-	0	-	-	0	ID only	ID only	1	-	-	0	142000	63700	2.2	2	N	Y	N	N
NP_001003249	GNAQ	guanine nucleotide-binding protein G(q) subunit alpha [Canis lupus familiaris]	37	9	8	35.4	5.38	-	-	0	ID only	ID only	1	-	-	0	2310000	748000	3.1	-	-	0	6160000	2390000	2.6	3	Y	Y	N	N
NP_001003263	GNAS	guanine nucleotide-binding protein G(s) subunit alpha [Canis lupus familiaris]	15	4	3	45.6	5.82	-	-	0	-	-	0	-	-	0	429000	167000	2.6	ID only	ID only	1	556000	180000	3.1	2	Y	Y	N	N
XP_848605	GNAZ	guanine nucleotide-binding protein G(z) subunit alpha [Canis lupus familiaris]	8	3	3	40.9	7.61	-	-	0	-	-	0	-	-	0	735000	226000	3.3	-	-	0	1090000	499000	2.2	2	Y	Y	N	N
NP_001182771	GNA11	guanine nucleotide-binding protein subunit alpha-11 [Canis lupus familiaris]	14	4	3	42.1	6.11	-	-	0	-	-	0	-	-	0	1200000	301000	4	-	-	0	1840000	836000	2.2	2	Y	Y	N	N
XP_005624332	GNA13	guanine nucleotide-binding protein subunit alpha-13 isoform X1 [Canis lupus familiaris]	9	2	2	33.2	6.11	-	-	0	-	-	0	-	-	0	588000	152000	3.9	-	-	0	709000	328000	2.2	2	Y	Y	N	N
XP_022270009	GNB4	guanine nucleotide-binding protein subunit beta-4 [Canis lupus familiaris]	9	2	1	37.6	6	-	-	0	ID only	10900	0.5	-	-	0	ID only	ID only	1	-	-	0	ID only	ID only	1	3	N	Y	N	N
XP_013964848	GNB5	guanine nucleotide-binding protein subunit beta-5 [Canis lupus familiaris]	12	2	2	33	6.7	898000	323000	2.8	644000	93800	6.9	667000	245000	2.7	550000	139000	4	1510000	943000	1.6	753000	256000	2.9	3	Y	Y	N	N
XP_545862	HDDC3	guanosine-3',5'-bis(diphosphate) 3'-pyrophosphohydrolase MESH1 [Canis lupus familiaris]	26	3	3	20.3	6.43	122000	50100	2.4	-	-	0	693000	382000	1.8	-	-	0	851000	345000	2.5	-	-	0	3	Y	N	N	N
NP_001018044	GUCY1B3	guanylate cyclase soluble subunit beta-1 [Canis lupus familiaris]	2	2	2	70.5	5.35	ID only	ID only	1	12200	10400	1.2	969000	347000	2.8	274000	111000	2.5	873000	435000	2	302000	189000	1.6	3	Y	Y	N	N
XP_532411	GUK1	guanylate kinase isoform X1 [Canis lupus familiaris]	24	3	3	24	7.39	-	-	0	-	-	0	721000	305000	2.4	-	-	0	739000	261000	2.8	-	-	0	2	Y	Y	N	N
XP_022276237	GBP1; LOC490172	guanylate-binding protein 1 [Canis lupus familiaris]	2	3	3	67.9	6.23	-	-	0	-	-	0	964000	343000	2.8	-	-	0	880000	540000	1.6	-	-	0	2	N	Y	N	N
XP_013970911	HDHD2	haloacid dehalogenase-like hydrolase domain-containing protein 2 isoform X1 [Canis lupus familiaris]	8	1	1	28.9	6.24	-	-	0	-	-	0	ID only	ID only	1	-	-	0	ID only	ID only	1	-	-	0	2	N	Y	N	N
XP_850996	HP; LOC479668	haptoglobin-like [Canis lupus familiaris]	21	18	18	38.4	6.24	1720000	105000	16.4	-	-	0	-	-	0	-	-	0	104000000	29400000	3.5	2040000	593000	3.4	2	Y	Y	Y	Y
NP_001003067	HSP70; LOC102155697	heat shock 70 kDa protein 1 [Canis lupus familiaris]	13	27	19	70	5.66	4250000	2630000	1.6	156000	166000	0.9	41900000	23100000	1.8	1300000	924000	1.4	90300000	56400000	1.6	2660000	1160000	2.3	3	N	Y	Y	N
XP_005627220	HSPA1L; LOC474850	heat shock 70 kDa protein 1-like isoform X1 [Canis lupus familiaris]	21	11	1	72.8	6.44	ID only	ID only	1	-	-	0	311000	151000	2.1	-	-	0	327000	292000	1.1	-	-	0	3	N	Y	N	N
NP_001041481	HSPA4	heat shock 70 kDa protein 4 [Canis lupus familiaris]	7	30	29	94.3	5.21	7670000	4240000	1.8	-	-	0	23600000	13900000	1.7	780000	340000	2.3	43100000	30000000	1.4	911000	422000	2.2	3	Y	Y	N	N
XP_022280619	HSPA4	heat shock 70 kDa protein 4 isoform X1 [Canis lupus familiaris]	2	1	1	99.2	5.44	-	-	0	27700	19900	1.4	-	-	0	-	-	0	-	-	0	-	-	0	1	N	Y	N	N
XP_005631881	HSPA4L	heat shock 70 kDa protein 4L isoform X1 [Canis lupus familiaris]	1	10	8	107.9	5.88	-	-	0	-	-	0	2150000	1010000	2.1	-	-	0	4590000	2890000	1.6	ID only	ID only	1	2	N	Y	N	N
XP_005619707	HSPA8	heat shock cognate 71 kDa protein [Canis lupus familiaris]	45	40	35	70.9	5.52	114000000	69600000	1.6	7390000	1630000	4.5	595000000	336000000	1.8	35900000	20600000	1.7	789000000	570000000	1.4	41700000	24800000	1.7	3	N	Y	Y	Y
XP_013962905	HSPH1	heat shock protein 105 kDa [Canis lupus familiaris]	9	9	8	97.3	5.53	46900	37100	1.3	-	-	0	2290000	1280000	1.8	-	-	0	754000	615000	1.2	-	-	0	3	N	Y	N	N
XP_005623992	HSP90AA1	heat shock protein HSP 90-alpha [Canis lupus familiaris]	33	33	24	71.5	5.14	22400000	11900000	1.9	315000	149000	2.1	111000000	65600000	1.7	5310000	3390000	1.6	188000000	121000000	1.6	7040000	5320000	1.3	3	N	Y	Y	N
XP_022281802	HSP90AB1	heat shock protein HSP 90-beta [Canis lupus familiaris]	26	27	17	83.2	5.03	11600000	6880000	1.7	2840000	1190000	2.4	42200000	25600000	1.7	19300000	11000000	1.7	79900000	58100000	1.4	20000000	16200000	1.2	3	N	Y	N	N
XP_537479	HSPA2	heat shock-related 70 kDa protein 2 [Canis lupus familiaris]	16	11	1	69.8	5.67	-	-	0	ID only	ID only	1	285000	83400	3.4	-	-	0	-	-	0	-	-	0	2	N	N	N	N
XP_005639607	HCLS1	hematopoietic lineage cell-specific protein [Canis lupus familiaris]	8	10	10	54	4.82	192000	165000	1.2	-	-	0	2240000	1150000	1.9	ID only	ID only	1	7000000	4780000	1.5	299000	288000	1	3	N	Y	N	N
NP_001257815	LOC100855540	hemoglobin subunit alpha-like [Canis lupus familiaris]	65	14	2	15.4	8.06	1890000	772000	2.4	-	-	0	5270000	2330000	2.3	-	-	0	3720000	2030000	1.8	-	-	0	3	Y	Y	Y	Y
XP_013977937	HBD; LOC476825	hemoglobin subunit beta [Canis lupus familiaris]	80	13	1	12.8	6.68	-	-	0	-	-	0	758000	79100	9.6	-	-	0	-	-	0	-	-	0	1	N	Y	Y	Y
NP_001257813	LOC480784; LOC609402	hemoglobin subunit beta-like [Canis lupus familiaris]	76	20	18	16.1	8.05	1810000000	763000000	2.4	18200000	9350000	1.9	5070000000	2680000000	1.9	105000000	84600000	1.2	2760000000	2040000000	1.4	61800000	50700000	1.2	3	N	Y	N	N
XP_542374	HBG2; HBE1	hemoglobin subunit epsilon [Canis lupus familiaris]	12	2	2	16.1	8.65	246000	8730000	0.1	ID only	ID only	1	-	-	0	-	-	0	-	-	0	-	-	0	1	N	N	N	N
XP_853676	HPX	hemopexin [Canis lupus familiaris]	29	10	10	51.3	7.31	3740000	702000	5.3	-	-	0	5620000	1380000	4.1	-	-	0	26300000	6480000	4.1	-	-	0	3	Y	Y	Y	Y
XP_850908	HPSE	heparanase [Canis lupus familiaris]	18	15	15	61.1	9.09	1240000	ID only	10	290000	11900	24.4	9500000	864000	11	1170000	91200	12.9	39400000	3350000	11.8	6440000	528000	12.2	3	Y	Y	Y	N
XP_003433491	SERPIND1	heparin cofactor 2 [Canis lupus familiaris]	4	2	2	56.6	6.27	-	-	0	-	-	0	545000	80900	6.7	280000	45400	6.2	993000	171000	5.8	ID only	ID only	1	2	Y	Y	N	N
XP_022271516	HGFAC	hepatocyte growth factor activator isoform X1 [Canis lupus familiaris]	2	1	1	75.3	7.72	-	-	0	-	-	0	-	-	0	-	-	0	ID only	ID only	1	-	-	0	1	N	N	N	N
XP_541884	MST1	hepatocyte growth factor-like protein isoform X1 [Canis lupus familiaris]	2	1	1	81.9	7.62	-	-	0	-	-	0	ID only	ID only	1	-	-	0	-	-	0	-	-	0	1	N	N	N	N
XP_013973117	HNRNPAB	heterogeneous nuclear ribonucleoprotein A/B [Canis lupus familiaris]	10	2	2	26.8	9.22	-	-	0	-	-	0	221000	152000	1.5	-	-	0	906000	451000	2	-	-	0	2	N	Y	N	N
XP_022266958	LOC102152026; HNRNPA1	heterogeneous nuclear ribonucleoprotein A1 [Canis lupus familiaris]	10	2	2	38.8	9.11	-	-	0	-	-	0	ID only	ID only	1	-	-	0	287000	189000	1.5	-	-	0	2	N	Y	N	N
XP_858404	HNRPDL; HNRNPDL	heterogeneous nuclear ribonucleoprotein D-like isoform X1 [Canis lupus familiaris]	4	2	1	46.3	9.57	-	-	0	-	-	0	505000	316000	1.6	-	-	0	-	-	0	-	-	0	1	N	Y	N	N
XP_005637561	HNRNPF	heterogeneous nuclear ribonucleoprotein F [Canis lupus familiaris]	12	3	2	45.6	5.49	-	-	0	-	-	0	-	-	0	-	-	0	ID only	ID only	1	-	-	0	1	N	Y	N	N
XP_005626358	HNRNPH1	heterogeneous nuclear ribonucleoprotein H isoform X1 [Canis lupus familiaris]	7	3	2	51.2	6.8	ID only	ID only	1	-	-	0	-	-	0	ID only	ID only	1	34000	24000	1.4	170000	83500	2	3	N	Y	N	N
XP_013966386	LOC100856555	heterogeneous nuclear ribonucleoprotein H2-like [Canis lupus familiaris]	6	1	1	29.3	7.21	-	-	0	-	-	0	-	-	0	-	-	0	ID only	ID only	1	-	-	0	1	N	Y	N	N
XP_005619005	HNRNPH3	heterogeneous nuclear ribonucleoprotein H3 isoform X1 [Canis lupus familiaris]	6	1	1	36.9	6.87	-	-	0	-	-	0	-	-	0	-	-	0	-	-	0	107000	ID only	10	1	N	Y	N	N
NP_001243477	HNRNPK	heterogeneous nuclear ribonucleoprotein K [Canis lupus familiaris]	7	4	4	50.9	5.45	991000	296000	3.4	111000	29000	3.8	1040000	187000	5.6	97500	13600	7.2	2620000	789000	3.3	322000	177000	1.8	3	Y	Y	N	N
XP_005616666	LOC100855936; HNRNPL	heterogeneous nuclear ribonucleoprotein L isoform X1 [Canis lupus familiaris]	3	1	1	64	8.22	-	-	0	-	-	0	-	-	0	-	-	0	ID only	ID only	1	-	-	0	1	N	N	N	N
XP_005617874	HNRNPR	heterogeneous nuclear ribonucleoprotein R isoform X1 [Canis lupus familiaris]	2	1	1	71.2	8.13	-	-	0	-	-	0	-	-	0	-	-	0	ID only	314000	0.5	-	-	0	1	N	Y	N	N
XP_005628702	HNRNPA2B1	heterogeneous nuclear ribonucleoproteins A2/B1 isoform X1 [Canis lupus familiaris]	11	2	2	37.4	8.95	-	-	0	-	-	0	ID only	ID only	1	159000	59200	2.7	ID only	ID only	1	193000	67500	2.9	2	Y	Y	N	N
XP_005619024	HK1	hexokinase-1 isoform X1 [Canis lupus familiaris]	6	8	8	104.2	6.48	152000	105000	1.5	58200	17700	3.3	1530000	540000	2.8	ID only	ID only	1	-	-	0	256000	161000	1.6	3	N	Y	N	N
XP_536376	HK1	hexokinase-1 isoform X3 [Canis lupus familiaris]	15	10	10	102.4	6.89	-	-	0	-	-	0	-	-	0	-	-	0	5320000	2960000	1.8	-	-	0	1	N	Y	N	N
XP_013966608	FCER1G	high affinity immunoglobulin epsilon receptor subunit gamma isoform X1 [Canis lupus familiaris]	32	3	3	11.9	7.77	-	-	0	450000	464000	1	-	-	0	1570000	1010000	1.6	-	-	0	3690000	1240000	3	3	N	Y	N	N
XP_013975979	HPCAL1	hippocalcin-like protein 1 [Canis lupus familiaris]	28	4	4	22.3	5.35	410000	224000	1.8	-	-	0	656000	316000	2.1	20200000	25300000	0.8	1660000	501000	3.3	941000	446000	2.1	3	Y	Y	N	N
XP_532657	HAL	histidine ammonia-lyase [Canis lupus familiaris]	3	1	1	72.1	6.89	-	-	0	ID only	5060	0.5	-	-	0	-	-	0	-	-	0	-	-	0	1	N	N	N	N
XP_531895	HINT1	histidine triad nucleotide-binding protein 1 [Canis lupus familiaris]	52	3	3	13.7	6.87	1830000	181000	10.1	-	-	0	139000	28000	5	-	-	0	851000	440000	1.9	-	-	0	3	Y	Y	N	N
XP_005617343	HARS	histidine--tRNA ligase, cytoplasmic isoform X1 [Canis lupus familiaris]	6	8	8	57.5	6.73	3730000	433000	8.6	91000	49100	1.9	2980000	1380000	2.2	476000	ID only	10	8370000	6270000	1.3	478000	47600	10	3	Y	Y	N	N
XP_005639866	LOC100683193; HRG	histidine-rich glycoprotein isoform X1 [Canis lupus familiaris]	18	11	11	61.7	7.36	4160000	347000	12	165000	10600	15.5	19700000	5930000	3.3	2590000	1110000	2.3	35200000	11600000	3	3240000	996000	3.3	3	Y	Y	Y	N
XP_013967511	H2AFV	histone H2A.V isoform X1 [Canis lupus familiaris]	5	1	1	20.3	9.64	-	-	0	18900	ID only	10	-	-	0	-	-	0	-	-	0	-	-	0	1	N	Y	N	N
XP_005640400	HOXD11; HOXD10	homeobox protein Hox-D10 [Canis lupus familiaris]	5	1	1	46.3	8.51	-	-	0	-	-	0	-	-	0	-	-	0	ID only	ID only	1	-	-	0	1	N	N	N	N
NP_001239347	ST13	hsc70-interacting protein [Canis lupus familiaris]	12	4	4	41.4	5.31	2320000	467000	5	-	-	0	2070000	894000	2.3	140000	101000	1.4	4560000	2720000	1.7	-	-	0	3	Y	Y	N	N
XP_854103	CDC37	hsp90 co-chaperone Cdc37 [Canis lupus familiaris]	11	9	9	44.6	5.25	3100000	520000	6	49500	30900	1.6	2880000	1030000	2.8	455000	267000	1.7	5460000	3420000	1.6	300000	186000	1.6	3	Y	Y	N	N
XP_013964425	HABP2	hyaluronan-binding protein 2 [Canis lupus familiaris]	2	1	1	62.3	6.98	-	-	0	-	-	0	-	-	0	130000	ID only	10	-	-	0	226000	ID only	10	2	Y	Y	Y	N
XP_535685	HADH	hydroxyacyl-coenzyme A dehydrogenase, mitochondrial [Canis lupus familiaris]	15	4	4	34.3	9.09	-	-	0	-	-	0	275000	146000	1.9	-	-	0	ID only	ID only	1	-	-	0	2	N	Y	N	N
XP_537013	HAGH	hydroxyacylglutathione hydrolase, mitochondrial isoform X1 [Canis lupus familiaris]	18	4	4	33.9	7.78	390000	127000	3.1	-	-	0	3180000	1740000	1.8	-	-	0	6280000	3160000	2	-	-	0	3	Y	Y	N	N
XP_003638949	LOC100855521; HMGCL	hydroxymethylglutaryl-CoA lyase, mitochondrial isoform X1 [Canis lupus familiaris]	4	2	2	34.2	8.54	-	-	0	-	-	0	84200	54700	1.5	ID only	ID only	1	ID only	ID only	1	ID only	ID only	1	2	N	Y	N	N
NP_001003357	HPRT1	hypoxanthine-guanine phosphoribosyltransferase isoform 1 [Canis lupus familiaris]	12	8	8	24.4	6.43	4330000	1580000	2.7	-	-	0	5820000	3540000	1.6	48400	ID only	10	21100000	8280000	2.6	348000	220000	1.6	3	Y	Y	N	N
XP_022273926	HYOU1	hypoxia up-regulated protein 1 isoform X1 [Canis lupus familiaris]	4	2	2	111.4	5.19	59700	40700	1.5	ID only	ID only	1	ID only	ID only	1	ID only	ID only	1	ID only	ID only	1	ID only	ID only	1	3	N	Y	N	N
XP_013964367	HIF1AN	hypoxia-inducible factor 1-alpha inhibitor [Canis lupus familiaris]	4	1	1	40.4	5.36	-	-	0	-	-	0	ID only	ID only	1	-	-	0	ID only	ID only	1	-	-	0	2	N	Y	N	N
XP_532398	IGJ; JCHAIN	immunoglobulin J chain [Canis lupus familiaris]	18	3	3	18.2	4.82	1080000	605000	1.8	ID only	ID only	1	1140000	618000	1.8	7950000	1890000	4.2	88300	25000	3.5	7350000	2450000	3	3	Y	N	N	N
XP_005636588	LOC612180	immunoglobulin lambda variable 1-40 [Canis lupus familiaris]	31	3	3	15.5	5.35	-	-	0	-	-	0	-	-	0	-	-	0	2090000	306000	6.8	-	-	0	1	N	N	N	N
XP_013963629	LOC607368	immunoglobulin lambda-1 light chain isoform X1 [Canis lupus familiaris]	53	12	0	25.2	7.33	-	-	0	-	-	0	-	-	0	-	-	0	340000000	84600000	4	-	-	0	1	N	N	N	N
XP_022266281	LOC607368	immunoglobulin lambda-1 light chain isoform X10 [Canis lupus familiaris]	46	10	1	24.9	5.33	139000	79300	1.7	-	-	0	938000	275000	3.4	-	-	0	-	-	0	-	-	0	2	N	N	N	N
XP_022266283	LOC607368	immunoglobulin lambda-1 light chain isoform X12 [Canis lupus familiaris]	54	12	1	25.1	7.3	-	-	0	-	-	0	-	-	0	-	-	0	866000	132000	6.5	-	-	0	1	N	N	N	N
XP_022266286	LOC607368	immunoglobulin lambda-1 light chain isoform X16 [Canis lupus familiaris]	46	11	1	25.3	7.75	33400000	5160000	6.5	-	-	0	297000	92800	3.2	29600000	4860000	6.1	1640000	212000	7.7	1860000	215000	8.6	3	Y	N	N	N
XP_013963623	LOC607368	immunoglobulin lambda-1 light chain isoform X2 [Canis lupus familiaris]	24	4	4	25.2	7.33	-	-	0	6460000	1190000	5.4	-	-	0	-	-	0	-	-	0	-	-	0	1	N	N	N	N
XP_022266277	LOC607368	immunoglobulin lambda-1 light chain isoform X3 [Canis lupus familiaris]	53	12	1	25.2	7.33	-	-	0	-	-	0	-	-	0	-	-	0	463000	63700	7.3	-	-	0	1	N	N	N	N
XP_022266300	LOC607368	immunoglobulin lambda-1 light chain isoform X32 [Canis lupus familiaris]	56	11	1	24.5	6.18	-	-	0	-	-	0	-	-	0	275000	ID only	10	-	-	0	ID only	ID only	1	2	N	N	N	N
XP_005636600	LOC607368	immunoglobulin lambda-1 light chain isoform X34 [Canis lupus familiaris]	56	11	1	24.7	6.89	-	-	0	-	-	0	88900000	24800000	3.6	151000	44900	3.4	-	-	0	71700000	14700000	4.9	2	Y	N	N	N
XP_022266303	LOC607368	immunoglobulin lambda-1 light chain isoform X37 [Canis lupus familiaris]	56	12	1	24.5	6.18	-	-	0	-	-	0	-	-	0	-	-	0	ID only	ID only	1	-	-	0	1	N	N	N	N
XP_022266304	LOC607368	immunoglobulin lambda-1 light chain isoform X38 [Canis lupus familiaris]	48	11	1	24.7	7.36	-	-	0	-	-	0	-	-	0	-	-	0	ID only	ID only	1	-	-	0	1	N	N	N	N
XP_022266306	LOC607368	immunoglobulin lambda-1 light chain isoform X40 [Canis lupus familiaris]	49	10	1	24.5	6.18	-	-	0	-	-	0	-	-	0	70300	10900	6.5	-	-	0	-	-	0	1	N	N	N	N
XP_022266308	LOC607368	immunoglobulin lambda-1 light chain isoform X42 [Canis lupus familiaris]	56	12	0	24.5	6.18	-	-	0	-	-	0	-	-	0	-	-	0	ID only	ID only	1	-	-	0	1	N	N	N	N
XP_022266309	LOC607368	immunoglobulin lambda-1 light chain isoform X44 [Canis lupus familiaris]	56	12	1	24.7	6.89	-	-	0	-	-	0	3900000	1150000	3.4	-	-	0	18100000	2580000	7	99800	17800	5.6	2	Y	N	N	N
XP_022266311	LOC607368	immunoglobulin lambda-1 light chain isoform X46 [Canis lupus familiaris]	48	11	1	24.6	7.4	-	-	0	-	-	0	-	-	0	-	-	0	ID only	ID only	1	-	-	0	1	N	N	N	N
XP_005636621	LOC100687054	immunoglobulin lambda-like polypeptide 5 [Canis lupus familiaris]	36	7	1	22.2	8.73	-	-	0	-	-	0	102000	19100	5.3	42000	11600	3.6	-	-	0	90100	9990	9	2	Y	N	N	N
XP_022267884	KPNA6	importin subunit alpha-7 isoform X1 [Canis lupus familiaris]	2	1	1	60.9	4.89	-	-	0	-	-	0	-	-	0	-	-	0	611000	344000	1.8	-	-	0	1	N	Y	N	N
XP_548162	KPNB1	importin subunit beta-1 [Canis lupus familiaris]	3	11	11	97.2	4.78	784000	535000	1.5	ID only	ID only	1	9570000	5790000	1.7	647000	245000	2.6	7560000	4340000	1.7	ID only	ID only	1	3	N	Y	N	N
XP_005634087	IPO5	importin-5 [Canis lupus familiaris]	18	11	11	117	4.96	169000	106000	1.6	-	-	0	3970000	1430000	2.8	-	-	0	2500000	1280000	2	-	-	0	3	Y	Y	N	N
XP_542501	IPO7	importin-7 [Canis lupus familiaris]	1	5	5	119.4	4.82	26900	13000	2.1	-	-	0	203000	102000	2	-	-	0	1440000	698000	2.1	ID only	ID only	1	3	Y	Y	N	N
XP_005622251	IPO9	importin-9 [Canis lupus familiaris]	3	1	1	119.3	5.05	ID only	ID only	1	-	-	0	-	-	0	-	-	0	-	-	0	-	-	0	1	N	Y	N	N
XP_022274488	INADL; PATJ	inaD-like protein isoform X1 [Canis lupus familiaris]	0	1	1	212.1	5.02	-	-	0	ID only	ID only	1	-	-	0	-	-	0	-	-	0	-	-	0	1	N	Y	N	N
XP_540364	INHBA	inhibin beta A chain [Canis lupus familiaris]	7	1	1	47.1	7.9	-	-	0	-	-	0	145000	ID only	10	-	-	0	-	-	0	-	-	0	1	N	N	N	N
XP_535679	PPA2	inorganic pyrophosphatase 2, mitochondrial isoform X1 [Canis lupus familiaris]	3	1	1	38.8	7.66	-	-	0	-	-	0	194000	108000	1.8	-	-	0	-	-	0	-	-	0	1	N	Y	N	N
XP_005632624	IMPDH2	inosine-5'-monophosphate dehydrogenase 2 isoform X1 [Canis lupus familiaris]	3	1	1	59	7.68	-	-	0	-	-	0	-	-	0	-	-	0	-	-	0	56300	ID only	10	1	N	Y	N	N
XP_852399	ITPR2	inositol 1,4,5-trisphosphate receptor type 2 isoform X1 [Canis lupus familiaris]	0	1	1	307.8	6.4	ID only	ID only	1	-	-	0	-	-	0	-	-	0	-	-	0	-	-	0	1	N	Y	N	N
XP_022268730	PPIP5K1	inositol hexakisphosphate and diphosphoinositol-pentakisphosphate kinase 1 isoform X1 [Canis lupus familiaris]	3	1	1	170.1	5.41	-	-	0	-	-	0	ID only	ID only	1	-	-	0	-	-	0	-	-	0	1	N	N	N	N
XP_022268164	IMPA1	inositol monophosphatase 1 isoform X1 [Canis lupus familiaris]	12	9	9	31.1	5.27	5890000	2110000	2.8	237000	27600	8.6	9280000	4380000	2.1	-	-	0	15500000	7670000	2	ID only	ID only	1	3	Y	Y	N	N
XP_013972731	MIOX	inositol oxygenase isoform X1 [Canis lupus familiaris]	5	2	2	32.9	5.39	-	-	0	-	-	0	1700000	744000	2.3	ID only	ID only	1	299000	183000	1.6	-	-	0	2	N	N	N	N
XP_536004	INPP1	inositol polyphosphate 1-phosphatase isoform X1 [Canis lupus familiaris]	15	4	4	42.8	6.43	151000	ID only	10	-	-	0	292000	126000	2.3	-	-	0	1230000	854000	1.4	-	-	0	3	Y	Y	N	N
XP_022262558	ISYNA1	inositol-3-phosphate synthase 1 [Canis lupus familiaris]	15	5	5	60.7	5.57	ID only	61200	0.5	-	-	0	2730000	1950000	1.4	-	-	0	3420000	2690000	1.3	-	-	0	3	N	Y	N	N
NP_001301029	IDE	insulin-degrading enzyme [Canis lupus familiaris]	2	2	2	117.9	6.71	-	-	0	-	-	0	426000	332000	1.3	-	-	0	ID only	ID only	1	-	-	0	2	N	Y	N	N
XP_013974708	IGF1	insulin-like growth factor I isoform X1 [Canis lupus familiaris]	8	1	1	19	10.13	-	-	0	-	-	0	ID only	ID only	1	-	-	0	116000	14800	7.8	-	-	0	2	N	N	N	N
XP_022260780	IGF2	insulin-like growth factor II isoform X1 [Canis lupus familiaris]	4	1	1	26.8	9.61	-	-	0	-	-	0	437000	20100	21.7	ID only	ID only	1	622000	69400	9	-	-	0	2	Y	N	N	N
XP_850184	IGFBP4	insulin-like growth factor-binding protein 4 [Canis lupus familiaris]	9	3	3	28	7.31	-	-	0	-	-	0	219000	ID only	10	-	-	0	497000	46700	10.6	-	-	0	2	Y	N	N	N
XP_858473	IGFBP6	insulin-like growth factor-binding protein 6 [Canis lupus familiaris]	11	1	1	25.3	8.6	-	-	0	-	-	0	61700	5440	11.3	-	-	0	-	-	0	-	-	0	1	N	Y	N	N
XP_547189	IGFALS	insulin-like growth factor-binding protein complex acid labile subunit [Canis lupus familiaris]	2	1	1	65.5	7.15	-	-	0	ID only	ID only	1	-	-	0	-	-	0	-	-	0	-	-	0	1	N	Y	N	N
XP_005619391	ITGA2	integrin alpha-2 [Canis lupus familiaris]	17	15	15	129.6	5.66	ID only	ID only	1	1190000	626000	1.9	-	-	0	4080000	2320000	1.8	-	-	0	8460000	4530000	1.9	3	N	Y	N	N
XP_003640224	LOC100856563; ITGA6	integrin alpha-6 isoform X1 [Canis lupus familiaris]	41	32	32	122	7.02	-	-	0	7690000	4380000	1.8	-	-	0	26900000	19300000	1.4	79900	247000	0.3	57900000	37000000	1.6	3	N	Y	N	N
NP_001003163	ITGA2B	integrin alpha-IIb [Canis lupus familiaris]	14	30	9	113.4	6.01	456000	334000	1.4	110000000	46300000	2.4	3740000	1370000	2.7	279000000	170000000	1.6	6240000	4860000	1.3	-	-	0	3	N	Y	Y	N
XP_022278237	ITGA2B	integrin alpha-IIb isoform X1 [Canis lupus familiaris]	37	29	2	114.5	6.07	-	-	0	212000	88500	2.4	-	-	0	2690000	1270000	2.1	-	-	0	376000000	205000000	1.8	3	Y	Y	N	N
XP_022278238	ITGA2B	integrin alpha-IIb isoform X2 [Canis lupus familiaris]	36	27	1	112.6	6.4	-	-	0	-	-	0	-	-	0	-	-	0	-	-	0	26000000	9730000	2.7	1	N	Y	N	N
XP_013966259	ITGAV	integrin alpha-V [Canis lupus familiaris]	3	2	2	111.1	5.9	-	-	0	-	-	0	-	-	0	304000	155000	2	-	-	0	844000	355000	2.4	2	Y	Y	N	N
XP_022261846	ITGB1	integrin beta-1 isoform X1 [Canis lupus familiaris]	21	12	12	88.5	5.47	-	-	0	5660000	2560000	2.2	-	-	0	-	-	0	-	-	0	-	-	0	1	N	N	N	N
XP_022261847	ITGB1	integrin beta-1 isoform X2 [Canis lupus familiaris]	31	19	19	88.1	5.38	-	-	0	-	-	0	-	-	0	10200000	7540000	1.4	-	-	0	25200000	16400000	1.5	2	N	Y	N	N
XP_005624231	ITGB3	integrin beta-3 isoform X1 [Canis lupus familiaris]	53	41	41	86.2	5.29	-	-	0	50500000	19800000	2.5	-	-	0	166000000	101000000	1.6	-	-	0	242000000	146000000	1.7	3	N	Y	Y	N
NP_001003162	ITGB3	integrin beta-3 precursor [Canis lupus familiaris]	19	9	9	86.4	5.33	182000	227000	0.8	-	-	0	1130000	454000	2.5	-	-	0	2920000	2740000	1.1	-	-	0	3	N	Y	N	N
XP_534040	ILK	integrin-linked protein kinase [Canis lupus familiaris]	40	18	18	51.4	8.07	36100000	5200000	6.9	13700000	6720000	2	52000000	14000000	3.7	60600000	32100000	1.9	97800000	63200000	1.5	64800000	46700000	1.4	3	Y	Y	Y	N
XP_533794	ITIH1; LOC476590	inter-alpha-trypsin inhibitor heavy chain H1 isoform X1 [Canis lupus familiaris]	8	8	8	100.9	6.98	-	-	0	-	-	0	5680000	1060000	5.4	-	-	0	3150000	339000	9.3	-	-	0	2	Y	Y	Y	N
XP_535195	ITIH2	inter-alpha-trypsin inhibitor heavy chain H2 [Canis lupus familiaris]	5	6	6	106.9	7.42	-	-	0	-	-	0	2460000	173000	14.2	-	-	0	971000	89700	10.8	-	-	0	2	Y	Y	Y	N
XP_005642305	ITIH4	inter-alpha-trypsin inhibitor heavy chain H4 isoform X1 [Canis lupus familiaris]	8	6	6	105.3	7.15	812000	34500	23.5	93900	6620	14.2	ID only	ID only	1	-	-	0	1360000	ID only	10	-	-	0	3	Y	Y	Y	N
XP_022279613	ICAM2	intercellular adhesion molecule 2 [Canis lupus familiaris]	5	1	1	37.2	7.49	-	-	0	126000	109000	1.1	-	-	0	ID only	ID only	1	-	-	0	2030000	1990000	1	3	N	Y	N	N
XP_005619540	IL18	interleukin-18 isoform X1 [Canis lupus familiaris]	9	5	5	23.4	5.69	1030000	130000	8	-	-	0	5550000	2510000	2.2	-	-	0	14400000	3930000	3.7	ID only	ID only	1	3	Y	Y	N	N
NP_001003200	IL8; CXCL8	interleukin-8 precursor [Canis lupus familiaris]	23	4	4	11.3	8.35	3550000	51000	69.6	-	-	0	7280000	537000	13.6	614000	178000	3.4	26400000	2890000	9.2	2630000	427000	6.2	3	Y	N	N	N
XP_005623999	INF2; LOC102153864	inverted formin-2 [Canis lupus familiaris]	12	7	7	76.3	6.65	445000	106000	4.2	ID only	ID only	1	2070000	517000	4	1010000	426000	2.4	2000000	762000	2.6	890000	514000	1.7	3	Y	Y	N	N
XP_005623929	INF2; LOC490877	inverted formin-2 isoform X1 [Canis lupus familiaris]	16	3	3	36.3	5.6	ID only	ID only	1	-	-	0	588000	72400	8.1	ID only	ID only	1	381000	237000	1.6	ID only	ID only	1	3	N	Y	N	N
XP_013966568	IDH1	isocitrate dehydrogenase [NADP] cytoplasmic [Canis lupus familiaris]	6	23	23	46.8	6.55	17100000	1460000	11.7	93100	28500	3.3	29100000	13200000	2.2	280000	130000	2.2	35500000	23100000	1.5	328000	146000	2.2	3	Y	Y	N	N
XP_013967907	IDH2	isocitrate dehydrogenase [NADP], mitochondrial [Canis lupus familiaris]	10	9	9	44.9	7.96	755000	141000	5.3	-	-	0	766000	435000	1.8	160000	191000	0.8	6760000	5930000	1.1	39000	78600	0.5	3	N	Y	N	N
XP_013964620	LOC100855750; JAKMIP3	janus kinase and microtubule-interacting protein 3 [Canis lupus familiaris]	1	1	1	91.3	6.62	-	-	0	-	-	0	391000	122000	3.2	-	-	0	-	-	0	-	-	0	1	N	N	N	N
NP_001191164	JMJD7	jmjC domain-containing protein 7 [Canis lupus familiaris]	7	1	1	35.9	5.36	-	-	0	-	-	0	-	-	0	-	-	0	ID only	ID only	1	-	-	0	1	N	N	N	N
XP_005624540	JUP	junction plakoglobin isoform X1 [Canis lupus familiaris]	4	4	4	81.7	6.14	-	-	0	1160000	ID only	10	244000	145000	1.7	214000	58400	3.7	218000	ID only	10	551000	246000	2.2	3	Y	N	N	N
XP_022271030	F11R	junctional adhesion molecule A [Canis lupus familiaris]	23	5	5	35.4	8.56	9200	ID only	10	496000	197000	2.5	1850000	291000	6.4	2160000	1000000	2.2	2990000	629000	4.8	3630000	1740000	2.1	3	Y	Y	N	N
XP_022273780	JAM3	junctional adhesion molecule C isoform X1 [Canis lupus familiaris]	4	1	1	35.5	8.05	-	-	0	ID only	ID only	1	-	-	0	73000	27600	2.6	-	-	0	84300	45300	1.9	3	N	Y	N	N
XP_022275981	LOC100856401; HN1L; JPT2	jupiter microtubule associated homolog 2 isoform X1 [Canis lupus familiaris]	15	2	2	21.1	7.21	281000	151000	1.9	-	-	0	553000	192000	2.9	12900	43100	0.3	1000000	260000	3.9	-	-	0	3	Y	Y	N	N
XP_535768	KALRN	kalirin isoform X1 [Canis lupus familiaris]	1	3	3	339.9	6.09	991000	101000	9.8	42600	54400	0.8	ID only	ID only	1	-	-	0	-	-	0	-	-	0	2	N	Y	N	N
XP_005639637	KALRN	kalirin isoform X8 [Canis lupus familiaris]	1	4	4	336.6	6.09	-	-	0	-	-	0	-	-	0	ID only	ID only	1	1440000	1030000	1.4	338000	382000	0.9	2	N	Y	N	N
XP_005623826	SERPINA4	kallistatin [Canis lupus familiaris]	4	4	4	48	7.11	1610000	130000	12.4	248000	11400	21.8	1500000	89800	16.7	249000	29300	8.5	1900000	273000	6.9	181000	ID only	10	3	Y	Y	N	N
XP_003434003	LOC100686187	keratin-associated protein 13-1-like [Canis lupus familiaris]	17	1	1	18	8.25	ID only	ID only	1	-	-	0	-	-	0	-	-	0	-	-	0	-	-	0	1	N	N	N	N
XP_013972063	KRT10	keratin, type I cytoskeletal 10 isoform X1 [Canis lupus familiaris]	28	24	3	62.2	5.2	605000	187000	3.2	1780000	313000	5.7	ID only	ID only	1	398000	403000	1	558000	ID only	10	476000	170000	2.8	3	Y	Y	N	N
NP_001333298	KRT13; LOC490983	keratin, type I cytoskeletal 13 [Canis lupus familiaris]	16	8	2	48.7	4.88	-	-	0	38900	5610	6.9	-	-	0	-	-	0	-	-	0	-	-	0	1	N	Y	N	N
XP_548100	KRT17	keratin, type I cytoskeletal 17 [Canis lupus familiaris]	21	8	3	48.1	5.06	-	-	0	-	-	0	-	-	0	-	-	0	-	-	0	741000	68200	10.9	1	N	N	N	N
XP_548129	KRT24	keratin, type I cytoskeletal 24 [Canis lupus familiaris]	6	4	2	56.4	4.91	ID only	ID only	1	22000	23000	1	-	-	0	-	-	0	-	-	0	-	-	0	1	N	N	N	N
NP_001003386	KRT2	keratin, type II cytoskeletal 2 epidermal [Canis lupus familiaris]	11	5	1	64.7	8.21	-	-	0	-	-	0	-	-	0	-	-	0	-	-	0	ID only	ID only	1	1	N	Y	N	N
XP_022267183	KRT3; KRT127	keratin, type II cytoskeletal 3 [Canis lupus familiaris]	4	2	1	58.1	5.94	-	-	0	-	-	0	-	-	0	-	-	0	-	-	0	ID only	11100	0.5	1	N	N	N	N
NP_001108111	FN3KRP	ketosamine-3-kinase [Canis lupus familiaris]	12	3	3	34.3	6.86	1120000	301000	3.7	-	-	0	501000	192000	2.6	-	-	0	2970000	2180000	1.4	-	-	0	3	Y	Y	N	N
XP_005629176	SZT2	KICSTOR complex protein SZT2 isoform X3 [Canis lupus familiaris]	1	1	1	377.5	6.16	-	-	0	11500000	1200000	9.6	-	-	0	2680000	3060000	0.9	1900000	965000	2	-	-	0	3	N	N	N	N
XP_005623905	LOC100855591; KLC1	kinesin light chain 1 isoform X1 [Canis lupus familiaris]	2	1	1	71.9	6.52	ID only	ID only	1	ID only	ID only	1	-	-	0	-	-	0	-	-	0	-	-	0	1	N	Y	N	N
XP_005627435	KLC4	kinesin light chain 4 [Canis lupus familiaris]	2	1	1	68.3	6.43	-	-	0	-	-	0	-	-	0	-	-	0	-	-	0	85900	54600	1.6	1	N	Y	N	N
XP_003638926	LOC100855651; KIF5B	kinesin-1 heavy chain [Canis lupus familiaris]	21	14	14	109.7	6.44	27000	35600	0.8	260000	60900	4.3	703000	290000	2.4	2450000	1080000	2.3	1680000	1160000	1.5	3710000	1930000	1.9	3	Y	Y	N	N
XP_850061	KIF2A	kinesin-like protein KIF2A isoform X1 [Canis lupus familiaris]	10	4	4	84	6.37	ID only	ID only	1	37600	15700	2.4	296000	ID only	10	602000	283000	2.1	299000	203000	1.5	1310000	498000	2.6	3	Y	Y	N	N
XP_005617565	KIFC3	kinesin-like protein KIFC3 isoform X1 [Canis lupus familiaris]	2	1	1	104.3	8.22	-	-	0	-	-	0	-	-	0	-	-	0	-	-	0	304000	30500	10	1	N	Y	N	N
XP_535836	KNG1	kininogen-1 isoform X2 [Canis lupus familiaris]	11	18	18	48.3	5.78	12900000	826000	15.6	-	-	0	57300000	7410000	7.7	1520000	485000	3.1	77800000	13600000	5.7	585000	209000	2.8	3	Y	Y	Y	Y
XP_005619899	AASDHPPT	L-aminoadipate-semialdehyde dehydrogenase-phosphopantetheinyl transferase [Canis lupus familiaris]	3	1	1	34.2	6.28	-	-	0	-	-	0	-	-	0	-	-	0	154000	95900	1.6	-	-	0	1	N	Y	N	N
XP_022274910	FUK	L-fucose kinase isoform X1 [Canis lupus familiaris]	1	1	1	117.3	6.21	-	-	0	-	-	0	86700	113000	0.8	ID only	ID only	1	-	-	0	-	-	0	1	N	N	N	N
XP_534084	LDHA; LOC476882	L-lactate dehydrogenase A chain isoform X1 [Canis lupus familiaris]	32	33	25	39.8	8.6	221000000	54700000	4	19700000	2460000	8	545000000	323000000	1.7	44600000	14200000	3.2	742000000	436000000	1.7	44100000	19300000	2.3	3	Y	Y	Y	Y
XP_005623457	LOC490690	L-lactate dehydrogenase A chain-like [Canis lupus familiaris]	29	9	2	36.6	6.64	ID only	ID only	1	-	-	0	2010000	1070000	1.9	-	-	0	2840000	2110000	1.3	-	-	0	3	N	Y	N	N
NP_001239093	LDHB	L-lactate dehydrogenase B chain [Canis lupus familiaris]	18	15	14	36.6	6.05	18000000	6150000	2.9	1200000	205000	5.9	33400000	21700000	1.5	1610000	667000	2.4	93800000	78200000	1.2	1480000	894000	1.7	3	Y	Y	Y	N
XP_013971703	DCXR	L-xylulose reductase [Canis lupus familiaris]	29	11	11	22.8	5.9	7900000	2050000	3.9	ID only	ID only	1	25400000	13600000	1.9	636000	211000	3	29600000	14100000	2.1	787000	542000	1.5	3	Y	Y	N	N
NP_001274005	LTF	lactotransferrin precursor [Canis lupus familiaris]	4	15	15	77.2	8.24	18800	19500	1	ID only	ID only	1	7860000	3430000	2.3	992000	824000	1.2	6170000	3490000	1.8	438000	221000	2	3	N	Y	N	N
XP_532129	GLO1	lactoylglutathione lyase [Canis lupus familiaris]	60	11	11	20.8	5.47	3740000	1680000	2.2	-	-	0	9520000	5220000	1.8	-	-	0	23700000	9440000	2.5	-	-	0	3	Y	Y	N	N
XP_543175	CRYL1	lambda-crystallin homolog isoform X1 [Canis lupus familiaris]	3	10	10	35.4	6.32	5360000	1860000	2.9	-	-	0	14000000	9100000	1.5	-	-	0	22500000	14400000	1.6	ID only	ID only	1	3	N	Y	N	N
NP_001274080	LMNA	lamin [Canis lupus familiaris]	2	1	1	74.2	7.02	-	-	0	ID only	ID only	1	-	-	0	-	-	0	-	-	0	-	-	0	1	N	Y	N	N
XP_536055	LANCL1	lanC-like protein 1 [Canis lupus familiaris]	8	3	3	45.4	7.66	325000	142000	2.3	161000	13300	12.1	1140000	564000	2	194000	70000	2.8	1480000	1010000	1.5	224000	91400	2.5	3	Y	Y	N	N
XP_005630374	LTBP1	latent-transforming growth factor beta-binding protein 1 isoform X1 [Canis lupus familiaris]	18	19	19	172.1	5.39	2050000	351000	5.8	5770000	276000	20.9	-	-	0	17800000	2560000	6.9	14500000	2740000	5.3	15100000	2350000	6.4	3	Y	Y	Y	Y
XP_005630377	LTBP1	latent-transforming growth factor beta-binding protein 1 isoform X5 [Canis lupus familiaris]	17	16	16	166.4	5.16	-	-	0	-	-	0	15600000	1620000	9.6	-	-	0	-	-	0	-	-	0	1	N	Y	N	N
XP_852979	LXN	latexin [Canis lupus familiaris]	33	4	4	25.5	5.95	307000	82700	3.7	-	-	0	2340000	952000	2.5	-	-	0	6220000	2740000	2.3	-	-	0	3	Y	Y	N	N
XP_022271944	MESDC2; MESD	LDLR chaperone MESD [Canis lupus familiaris]	5	4	4	29	8.38	411000	223000	1.8	-	-	0	1460000	772000	1.9	ID only	ID only	1	1290000	546000	2.4	ID only	ID only	1	3	N	Y	N	N
XP_537355	LGMN	legumain isoform X1 [Canis lupus familiaris]	7	1	1	49.4	6.6	-	-	0	-	-	0	-	-	0	-	-	0	ID only	ID only	1	-	-	0	1	N	Y	N	N
XP_005621453	LCMT1	leucine carboxyl methyltransferase 1 isoform X1 [Canis lupus familiaris]	9	2	2	38.2	5.31	ID only	ID only	1	-	-	0	ID only	ID only	1	-	-	0	254000	ID only	10	-	-	0	3	N	Y	N	N
XP_854692	LRG1	leucine-rich alpha-2-glycoprotein [Canis lupus familiaris]	7	3	3	39	6.65	1240000	8680	142.8	-	-	0	-	-	0	-	-	0	1400000	294000	4.8	-	-	0	2	Y	N	N	N
XP_005635994	LRRFIP1	leucine-rich repeat flightless-interacting protein 1 [Canis lupus familiaris]	5	2	2	76.3	6.21	-	-	0	-	-	0	ID only	ID only	1	-	-	0	461000	240000	1.9	-	-	0	2	N	Y	N	N
XP_005634289	LRRFIP2	leucine-rich repeat flightless-interacting protein 2 isoform X1 [Canis lupus familiaris]	2	1	1	84.7	7.31	-	-	0	-	-	0	-	-	0	-	-	0	-	-	0	ID only	ID only	1	1	N	Y	N	N
XP_548200	LRRC59	leucine-rich repeat-containing protein 59 [Canis lupus familiaris]	9	2	2	34.8	9.66	-	-	0	-	-	0	-	-	0	-	-	0	-	-	0	157000	103000	1.5	1	N	Y	N	N
XP_005616374	CD37	leukocyte antigen CD37 isoform X1 [Canis lupus familiaris]	8	1	1	34.1	7.93	-	-	0	-	-	0	-	-	0	ID only	ID only	1	-	-	0	-	-	0	1	N	Y	N	N
XP_022270187	SERPINB1	leukocyte elastase inhibitor [Canis lupus familiaris]	28	5	4	30.5	6.19	-	-	0	-	-	0	1310000	870000	1.5	-	-	0	1860000	1080000	1.7	-	-	0	2	N	Y	Y	N
XP_005639512	CD47	leukocyte surface antigen CD47 isoform X1 [Canis lupus familiaris]	4	1	1	35.2	7.09	-	-	0	53400	58300	0.9	-	-	0	841000	352000	2.4	-	-	0	1380000	657000	2.1	3	Y	Y	N	N
XP_539728	LTA4H	leukotriene A-4 hydrolase [Canis lupus familiaris]	34	45	45	69.2	6.34	92300000	57100000	1.6	1780000	495000	3.6	394000000	236000000	1.7	6840000	3890000	1.8	482000000	360000000	1.3	9440000	6420000	1.5	3	N	Y	N	N
XP_005626035	LIMS1	LIM and senescent cell antigen-like-containing domain protein 1 isoform X1 [Canis lupus familiaris]	19	4	4	45.8	7.94	29600000	8910000	3.3	-	-	0	-	-	0	-	-	0	-	-	0	-	-	0	1	N	Y	Y	N
XP_862938	LIMS1	LIM and senescent cell antigen-like-containing domain protein 1 isoform X2 [Canis lupus familiaris]	44	16	16	44.4	7.96	-	-	0	20500000	3630000	5.6	26900000	10900000	2.5	24600000	7420000	3.3	66200000	32200000	2.1	27500000	12200000	2.3	3	Y	Y	N	N
XP_864168	LASP1	LIM and SH3 domain protein 1 isoform X1 [Canis lupus familiaris]	35	8	8	29.8	6.79	4360000	1950000	2.2	1170000	253000	4.6	8900000	5240000	1.7	9090000	7820000	1.2	19700000	15800000	1.2	12200000	10000000	1.2	3	N	Y	Y	N
XP_005621440	LAT	linker for activation of T-cells family member 1, partial [Canis lupus familiaris]	9	1	1	22.8	4.25	-	-	0	-	-	0	-	-	0	-	-	0	-	-	0	ID only	ID only	1	1	N	Y	N	N
XP_022270077	LPP	lipoma-preferred partner isoform X3 [Canis lupus familiaris]	10	4	4	65.8	7.46	-	-	0	-	-	0	-	-	0	165000	218000	0.8	-	-	0	35600	ID only	10	2	N	Y	N	N
XP_005615403	LOC476181; KIAA1468	lisH domain and HEAT repeat-containing protein KIAA1468 homolog isoform X1 [Canis lupus familiaris]	1	1	1	135.2	5.43	53300	40800	1.3	-	-	0	-	-	0	ID only	ID only	1	-	-	0	-	-	0	2	N	Y	N	N
XP_545182	KIAA0947; ICE1	little elongation complex subunit 1 isoform X1 [Canis lupus familiaris]	1	1	1	245	5.59	-	-	0	-	-	0	-	-	0	ID only	ID only	1	-	-	0	-	-	0	1	N	N	N	N
XP_013975698	LOC606814; ACP1	low molecular weight phosphotyrosine protein phosphatase [Canis lupus familiaris]	39	5	5	12.4	6.29	1170000	315000	3.7	-	-	0	3170000	1970000	1.6	-	-	0	3490000	1380000	2.5	-	-	0	3	Y	Y	N	N
XP_849111	LY6G6C	lymphocyte antigen 6 complex locus protein G6c [Canis lupus familiaris]	20	2	2	13.8	8.29	-	-	0	121000	70300	1.7	-	-	0	887000	363000	2.4	-	-	0	1460000	437000	3.3	3	Y	N	N	N
XP_005627210	LY6G6F	lymphocyte antigen 6 complex locus protein G6f isoform X1 [Canis lupus familiaris]	22	5	5	32.4	8.03	1630000	435000	3.8	ID only	ID only	1	6260000	1830000	3.4	3950000	1490000	2.6	11800000	1690000	7	4700000	1910000	2.5	3	Y	Y	N	N
XP_532343	LOC475113	lymphocyte antigen 6B-like [Canis lupus familiaris]	11	1	1	13.4	7.77	-	-	0	-	-	0	-	-	0	34100	41600	0.8	-	-	0	31600	21200	1.5	2	N	N	N	N
XP_005619277	LCP2	lymphocyte cytosolic protein 2 [Canis lupus familiaris]	2	8	8	60.2	6.33	-	-	0	-	-	0	1350000	151000	8.9	-	-	0	3240000	257000	12.6	55700	38900	1.4	2	Y	Y	N	N
XP_013976043	LOC102156962; CD58	lymphocyte function-associated antigen 3 [Canis lupus familiaris]	10	2	2	28	7.24	-	-	0	-	-	0	-	-	0	282000	89700	3.1	-	-	0	681000	290000	2.4	2	Y	Y	N	N
XP_855467	BRCC3	lys-63-specific deubiquitinase BRCC36 isoform X1 [Canis lupus familiaris]	10	2	2	36	5.92	-	-	0	-	-	0	-	-	0	-	-	0	181000	85600	2.1	-	-	0	1	N	Y	N	N
XP_022274878	KARS	lysine--tRNA ligase isoform X1 [Canis lupus familiaris]	5	1	1	71.5	6.89	-	-	0	-	-	0	-	-	0	-	-	0	ID only	ID only	1	-	-	0	1	N	Y	N	N
XP_850233	ACP2	lysosomal acid phosphatase [Canis lupus familiaris]	4	2	2	48	5.88	-	-	0	-	-	0	555000	59700	9.3	-	-	0	-	-	0	-	-	0	1	N	Y	N	N
XP_022278351	GAA	lysosomal alpha-glucosidase isoform X1 [Canis lupus familiaris]	2	1	1	108.7	6.79	-	-	0	-	-	0	511000	31100	16.4	-	-	0	536000	44600	12	-	-	0	2	Y	N	N	N
XP_005632890	MAN2B1	lysosomal alpha-mannosidase isoform X1 [Canis lupus familiaris]	4	6	6	113.2	7.66	-	-	0	-	-	0	1310000	112000	11.7	149000	ID only	10	1220000	90500	13.5	-	-	0	2	Y	Y	N	N
NP_001103385	CTSA	lysosomal protective protein precursor [Canis lupus familiaris]	2	3	3	56.5	6.33	-	-	0	-	-	0	246000	24700	10	-	-	0	868000	56600	15.3	29600	ID only	10	2	Y	Y	Y	N
XP_534193	LAMP1	lysosome-associated membrane glycoprotein 1 isoform X1 [Canis lupus familiaris]	3	1	1	44.2	8.41	-	-	0	52700	ID only	10	-	-	0	343000	217000	1.6	-	-	0	-	-	0	2	N	Y	N	N
NP_001287805	LYZ	lysozyme C precursor [Canis lupus familiaris]	37	5	5	16.5	8.95	1080000	102000	10.7	ID only	ID only	1	2970000	929000	3.2	-	-	0	5700000	1140000	5	-	-	0	3	Y	N	Y	Y
XP_005630578	LOXL3	lysyl oxidase homolog 3 isoform X1 [Canis lupus familiaris]	12	14	14	87.5	7.83	ID only	ID only	1	-	-	0	11100000	1440000	7.7	1820000	225000	8.1	13300000	2210000	6	1080000	69500	15.6	3	Y	Y	Y	N
XP_022260453	CAPG	macrophage-capping protein isoform X1 [Canis lupus familiaris]	26	11	11	38.8	6.46	8870000	2990000	3	-	-	0	17300000	7040000	2.5	635000	378000	1.7	30000000	18400000	1.6	1820000	1180000	1.5	3	Y	N	N	N
XP_537388	MDP1; LOC480264	magnesium-dependent phosphatase 1 [Canis lupus familiaris]	26	2	2	18.5	6.09	-	-	0	-	-	0	ID only	ID only	1	-	-	0	ID only	ID only	1	-	-	0	2	N	Y	N	N
XP_005630235	MFSD2B	major facilitator superfamily domain-containing protein 2B [Canis lupus familiaris]	4	1	1	48.7	8.51	-	-	0	-	-	0	-	-	0	-	-	0	-	-	0	ID only	ID only	1	1	N	Y	N	N
NP_001274075	MVP	major vault protein [Canis lupus familiaris]	21	12	12	99.1	5.68	-	-	0	231000	68100	3.4	-	-	0	5360000	2660000	2	-	-	0	7070000	3990000	1.8	3	Y	Y	N	N
XP_531844	MDH1	malate dehydrogenase, cytoplasmic [Canis lupus familiaris]	11	13	13	36.4	6.92	45200000	16800000	2.7	973000	141000	6.9	88900000	59600000	1.5	1390000	348000	4	128000000	80400000	1.6	612000	324000	1.9	3	Y	Y	N	N
XP_849944	MDH2	malate dehydrogenase, mitochondrial [Canis lupus familiaris]	14	15	15	35.4	8.54	4480000	2220000	2	-	-	0	20800000	16700000	1.2	612000	347000	1.8	32000000	21300000	1.5	656000	337000	1.9	3	N	Y	N	N
XP_863658	MLEC	malectin isoform X1 [Canis lupus familiaris]	25	6	6	32	5.41	881000	258000	3.4	387000	102000	3.8	1020000	476000	2.1	782000	443000	1.8	3090000	1300000	2.4	1300000	700000	1.9	3	Y	Y	N	N
XP_022263842	LOC487150	malignant T-cell-amplified sequence 1-like [Canis lupus familiaris]	14	3	3	20.5	8.65	587000	192000	3.1	-	-	0	703000	282000	2.5	-	-	0	1190000	401000	3	-	-	0	3	Y	Y	N	N
XP_022259435	MGAM	maltase-glucoamylase, intestinal isoform X1 [Canis lupus familiaris]	1	1	1	208.7	5.97	-	-	0	-	-	0	-	-	0	-	-	0	ID only	ID only	1	-	-	0	1	N	N	N	N
XP_022260895	EPDR1	mammalian ependymin-related protein 1 [Canis lupus familiaris]	19	3	3	14.2	4.53	5670000	250000	22.7	-	-	0	1520000	159000	9.5	-	-	0	8360000	136000	61.5	-	-	0	3	Y	Y	N	N
XP_544572	MASP2	mannan-binding lectin serine protease 2 [Canis lupus familiaris]	2	1	1	74.9	5.83	-	-	0	-	-	0	176000	21600	8.1	-	-	0	443000	32400	13.7	-	-	0	2	Y	N	N	N
XP_003639816	GMPPB	mannose-1-phosphate guanyltransferase beta [Canis lupus familiaris]	9	9	9	39.9	6.52	458000	142000	3.2	-	-	0	5300000	1310000	4.1	134000	63300	2.1	3760000	8740000	0.4	ID only	ID only	1	3	Y	Y	N	N
XP_022268540	MPI	mannose-6-phosphate isomerase isoform X1 [Canis lupus familiaris]	4	7	7	50.3	8.92	4030000	1160000	3.5	-	-	0	-	-	0	-	-	0	9450000	6370000	1.5	89400	32400	2.8	2	N	Y	N	N
XP_013964961	MPI	mannose-6-phosphate isomerase isoform X2 [Canis lupus familiaris]	42	10	10	46.2	6.24	-	-	0	-	-	0	12600000	7320000	1.7	-	-	0	-	-	0	-	-	0	1	N	Y	N	N
XP_005619145	LOC479260; MBL2	mannose-binding protein C [Canis lupus familiaris]	6	1	1	25.7	7.28	-	-	0	-	-	0	216000	ID only	10	-	-	0	-	-	0	-	-	0	1	N	N	N	N
XP_541872	MAPKAPK3	MAP kinase-activated protein kinase 3 [Canis lupus familiaris]	3	3	3	43	7.69	290000	85500	3.4	58900	7370	8	517000	187000	2.8	142000	57400	2.5	395000	300000	1.3	211000	89600	2.4	3	Y	Y	N	N
XP_003640024	LOC100856382; MGP	matrix Gla protein [Canis lupus familiaris]	13	1	1	12.2	9.35	-	-	0	-	-	0	-	-	0	-	-	0	-	-	0	ID only	ID only	1	1	N	N	N	N
XP_005635025	MMP24	matrix metalloproteinase-24 [Canis lupus familiaris]	2	1	1	71.9	8.73	-	-	0	-	-	0	ID only	ID only	1	-	-	0	-	-	0	-	-	0	1	N	N	N	N
XP_022266510	MED13L	mediator of RNA polymerase II transcription subunit 13-like [Canis lupus familiaris]	1	1	1	242.1	6.1	-	-	0	-	-	0	-	-	0	-	-	0	19100000	7370000	2.6	-	-	0	1	N	N	N	N
XP_849786	C12H6orf25; MPIG6B	megakaryocyte and platelet inhibitory receptor G6b isoform X2 [Canis lupus familiaris]	19	4	4	23.7	8.13	-	-	0	142000	211000	0.7	-	-	0	207000	89500	2.3	-	-	0	2070000	574000	3.6	3	Y	Y	N	N
XP_005633123	MATK	megakaryocyte-associated tyrosine-protein kinase isoform X1 [Canis lupus familiaris]	8	2	2	54	9.11	ID only	ID only	1	-	-	0	-	-	0	ID only	ID only	1	96400	60400	1.6	287000	149000	1.9	3	N	N	N	N
XP_005622378	CD46; LOC609365	membrane cofactor protein isoform X1 [Canis lupus familiaris]	25	8	8	43.4	7.36	-	-	0	478000	288000	1.7	-	-	0	2490000	1260000	2	-	-	0	3940000	1800000	2.2	3	Y	Y	N	N
XP_854751	MMGT1	membrane magnesium transporter 1 [Canis lupus familiaris]	18	1	1	14.6	8.75	-	-	0	-	-	0	-	-	0	ID only	ID only	1	-	-	0	-	-	0	1	N	N	N	N
NP_001182077	PGRMC1	membrane-associated progesterone receptor component 1 [Canis lupus familiaris]	19	3	3	21.6	4.7	-	-	0	ID only	26800	0.5	-	-	0	ID only	ID only	1	-	-	0	132000	83800	1.6	3	N	Y	N	N
XP_005631865	PGRMC2	membrane-associated progesterone receptor component 2, partial [Canis lupus familiaris]	7	2	2	32.4	8.22	-	-	0	-	-	0	-	-	0	-	-	0	-	-	0	56800	19600	2.9	1	N	Y	N	N
XP_003639808	LOC100855747; MANF	mesencephalic astrocyte-derived neurotrophic factor [Canis lupus familiaris]	6	6	6	25.3	9.69	5750000	2060000	2.8	166000	88500	1.9	4140000	2220000	1.9	129000	72100	1.8	7950000	2670000	3	170000	136000	1.2	3	Y	Y	Y	N
XP_022271200	TIMP1	metalloproteinase inhibitor 1 isoform X1 [Canis lupus familiaris]	49	16	16	28.5	9.06	243000000	23000000	10.6	4480000	84200	53.2	797000000	109000000	7.3	22100000	2240000	9.9	1820000000	181000000	10.1	45100000	11200000	4	3	Y	Y	N	N
NP_001003082	TIMP2	metalloproteinase inhibitor 2 precursor [Canis lupus familiaris]	16	16	16	24.3	7.91	38900000	2600000	14.9	156000	15800	9.9	80500000	7950000	10.1	2980000	408000	7.3	144000000	9760000	14.8	4360000	2190000	2	3	Y	Y	N	N
NP_001271368	TIMP3	metalloproteinase inhibitor 3 precursor [Canis lupus familiaris]	44	10	10	24.1	8.82	ID only	ID only	1	39900	ID only	10	-	-	0	1860000	26700	69.5	1590000	ID only	10	10800000	266000	40.7	3	Y	Y	N	Y
XP_005627984	MTSS1	metastasis suppressor protein 1 isoform X1 [Canis lupus familiaris]	3	1	1	86.2	6.46	-	-	0	-	-	0	-	-	0	ID only	ID only	1	-	-	0	ID only	ID only	1	2	N	Y	N	N
XP_013967502	METRNL	meteorin-like protein [Canis lupus familiaris]	4	2	2	36.1	8.7	-	-	0	-	-	0	282000	ID only	10	-	-	0	785000	26500	29.6	81200	6380	12.7	2	Y	N	N	N
XP_003434556	MAT2B	methionine adenosyltransferase 2 subunit beta isoform X1 [Canis lupus familiaris]	11	2	2	37.7	7.12	ID only	ID only	1	-	-	0	667000	437000	1.5	-	-	0	1280000	406000	3.1	-	-	0	3	N	Y	N	N
XP_866154	METAP2	methionine aminopeptidase 2 isoform X1 [Canis lupus familiaris]	12	3	1	52.8	5.92	-	-	0	-	-	0	ID only	ID only	1	-	-	0	48600	33700	1.4	-	-	0	2	N	Y	N	N
XP_005629295	METAP2	methionine aminopeptidase 2 isoform X2 [Canis lupus familiaris]	12	3	1	52.8	5.92	-	-	0	-	-	0	101000	54800	1.8	-	-	0	145000	74200	2	-	-	0	2	N	Y	N	N
XP_005623712	ALDH6A1	methylmalonate-semialdehyde dehydrogenase [acylating], mitochondrial [Canis lupus familiaris]	7	2	2	57.7	8.37	-	-	0	-	-	0	-	-	0	-	-	0	-	-	0	ID only	ID only	1	1	N	Y	N	N
NP_001003288	CLNS1A	methylosome subunit pICln [Canis lupus familiaris]	6	1	1	25.9	4.16	-	-	0	-	-	0	372000	204000	1.8	-	-	0	570000	393000	1.5	-	-	0	2	N	N	N	N
XP_022262689	MRI1	methylthioribose-1-phosphate isomerase [Canis lupus familiaris]	12	2	2	37.6	6.29	-	-	0	-	-	0	150000	61400	2.4	-	-	0	597000	348000	1.7	-	-	0	2	N	Y	N	N
XP_013976614	APIP	methylthioribulose-1-phosphate dehydratase [Canis lupus familiaris]	12	2	2	27	6.92	-	-	0	-	-	0	368000	220000	1.7	-	-	0	693000	268000	2.6	-	-	0	2	N	Y	N	N
XP_547214	C6H16orf13; METTL26	methyltransferase-like 26 [Canis lupus familiaris]	7	1	1	22.7	7.08	-	-	0	-	-	0	-	-	0	-	-	0	226000	ID only	10	-	-	0	1	N	Y	N	N
XP_003433584	METTL7A	methyltransferase-like protein 7A [Canis lupus familiaris]	21	3	3	28	8.57	-	-	0	-	-	0	-	-	0	260000	127000	2	-	-	0	956000	426000	2.2	2	Y	Y	N	N
NP_001014401	DLA-12	MHC class I DLA-12 precursor [Canis lupus familiaris]	37	11	2	39.8	6.37	-	-	0	6560000	2390000	2.7	-	-	0	700000	332000	2.1	-	-	0	1170000	622000	1.9	3	Y	N	N	N
NP_001014400	DLA-64	MHC class I DLA-64 precursor [Canis lupus familiaris]	7	1	1	40.1	5.99	1070000	170000	6.3	-	-	0	-	-	0	-	-	0	-	-	0	-	-	0	1	N	N	N	N
NP_001014767	DLA88	MHC class I DLA-88 precursor [Canis lupus familiaris]	40	13	5	40.4	6.2	-	-	0	1910000	603000	3.2	1890000	488000	3.9	20300000	10200000	2	973000	342000	2.8	17900000	7880000	2.3	3	Y	Y	N	N
XP_848455	CHCHD3	MICOS complex subunit MIC19 isoform X1 [Canis lupus familiaris]	5	1	1	26.7	8.1	-	-	0	-	-	0	-	-	0	-	-	0	-	-	0	108000	58000	1.9	1	N	Y	N	N
XP_852196	IMMT	MICOS complex subunit MIC60 isoform X1 [Canis lupus familiaris]	3	1	1	83.7	6.57	-	-	0	-	-	0	-	-	0	-	-	0	-	-	0	181000	99100	1.8	1	N	Y	N	N
XP_546650	MFAP4	microfibril-associated glycoprotein 4 [Canis lupus familiaris]	7	3	3	28.4	5.9	185000	ID only	10	ID only	ID only	1	2470000	39400	62.7	662000	ID only	10	2250000	ID only	10	343000	ID only	10	3	Y	N	N	N
NP_001239339	MGST3	microsomal glutathione S-transferase 3 [Canis lupus familiaris]	34	4	4	16.5	9.5	-	-	0	318000	339000	0.9	-	-	0	387000	250000	1.6	-	-	0	1570000	871000	1.8	3	N	Y	N	N
XP_013974782	MACF1	microtubule-actin cross-linking factor 1 isoform X1 [Canis lupus familiaris]	0	2	2	869.9	5.35	-	-	0	-	-	0	-	-	0	ID only	ID only	1	-	-	0	262000	113000	2.3	2	N	Y	N	N
NP_001238875	MAPRE1	microtubule-associated protein RP/EB family member 1 [Canis lupus familiaris]	7	14	14	30	5.31	3770000	1050000	3.6	-	-	0	21600000	9170000	2.3	452000	239000	1.9	44700000	20700000	2.2	400000	348000	1.2	3	Y	Y	Y	N
XP_022277174	MAPRE2	microtubule-associated protein RP/EB family member 2 isoform X1 [Canis lupus familiaris]	31	7	3	40.1	5.4	1500000	1130000	1.3	-	-	0	-	-	0	-	-	0	10600000	4440000	2.4	-	-	0	2	N	Y	N	N
XP_547609	MAPRE2	microtubule-associated protein RP/EB family member 2 isoform X4 [Canis lupus familiaris]	16	7	6	37	5.57	-	-	0	-	-	0	2250000	604000	3.7	-	-	0	939000	353000	2.7	ID only	ID only	1	2	Y	Y	N	N
XP_022279672	LOC491316; MDK	midkine [Canis lupus familiaris]	14	1	1	15.5	9.83	-	-	0	-	-	0	398000	ID only	10	ID only	ID only	1	ID only	ID only	1	-	-	0	2	N	N	N	N
XP_535508	LOC478335; FAM96A	MIP18 family protein FAM96A [Canis lupus familiaris]	6	1	1	18.7	4.98	-	-	0	-	-	0	404000	247000	1.6	-	-	0	828000	316000	2.6	-	-	0	2	N	Y	N	N
XP_536607	SLC25A11	mitochondrial 2-oxoglutarate/malate carrier protein isoform X1 [Canis lupus familiaris]	5	1	1	34.1	9.94	-	-	0	-	-	0	-	-	0	ID only	ID only	1	-	-	0	ID only	ID only	1	2	N	Y	N	N
XP_013962311	MAVS	mitochondrial antiviral-signaling protein isoform X1 [Canis lupus familiaris]	4	1	1	54.5	6.34	-	-	0	-	-	0	-	-	0	ID only	ID only	1	-	-	0	ID only	ID only	1	2	N	Y	N	N
XP_013963042	MSRA; LOC608103	mitochondrial peptide methionine sulfoxide reductase isoform X1 [Canis lupus familiaris]	9	1	1	25.9	7.87	ID only	ID only	1	-	-	0	ID only	ID only	1	-	-	0	149000	28100	5.3	-	-	0	3	N	Y	N	N
XP_005631033	PMPCB	mitochondrial-processing peptidase subunit beta [Canis lupus familiaris]	3	1	1	56.8	7.28	-	-	0	-	-	0	-	-	0	-	-	0	ID only	ID only	1	-	-	0	1	N	Y	N	N
NP_001104270	MAPK1	mitogen-activated protein kinase 1 [Canis lupus familiaris]	11	10	10	41.4	6.98	1110000	272000	4.1	-	-	0	4430000	1810000	2.5	909000	292000	3.1	12700000	8310000	1.5	1070000	516000	2.1	3	Y	Y	N	N
NP_001003206	MAPK14	mitogen-activated protein kinase 14 [Canis lupus familiaris]	43	10	9	41.2	5.78	3260000	779000	4.2	-	-	0	4320000	2050000	2.1	220000	85000	2.6	8900000	4670000	1.9	-	-	0	3	Y	Y	N	N
XP_856169	MAPK9	mitogen-activated protein kinase 9 isoform X1 [Canis lupus familiaris]	21	8	7	48.1	5.74	198000	12100	16.3	-	-	0	711000	223000	3.2	-	-	0	1960000	1180000	1.7	-	-	0	3	Y	Y	N	N
XP_022280266	MAP4K4	mitogen-activated protein kinase kinase kinase kinase 4 isoform X1 [Canis lupus familiaris]	1	1	1	152.7	7.52	159000	ID only	10	23500	14200	1.7	-	-	0	-	-	0	ID only	ID only	1	-	-	0	2	N	Y	N	N
XP_005628335	MOB1B	MOB kinase activator 1B isoform X1 [Canis lupus familiaris]	12	2	2	25.1	6.73	482000	108000	4.5	ID only	84400	0.5	-	-	0	-	-	0	386000	40500	9.5	-	-	0	2	Y	Y	N	N
XP_854258	MOB2	MOB kinase activator 2 isoform X2 [Canis lupus familiaris]	4	1	1	29.8	7.74	-	-	0	351000	54800	6.4	-	-	0	-	-	0	-	-	0	-	-	0	1	N	Y	N	N
XP_013966512	HSPE1	MOB-like protein phocein isoform X4 [Canis lupus familiaris]	5	1	1	31.5	7.4	2090000	681000	3.1	121000	71900	1.7	955000	627000	1.5	174000	151000	1.2	1160000	884000	1.3	298000	90000	3.3	3	N	Y	N	N
XP_005641475	MSN	moesin isoform X1 [Canis lupus familiaris]	46	38	30	69.7	6.74	78600000	52300000	1.5	4960000	1450000	3.4	255000000	160000000	1.6	37500000	21600000	1.7	444000000	331000000	1.3	47400000	26000000	1.8	3	N	Y	Y	N
XP_022279825	SLC16A7	monocarboxylate transporter 2 [Canis lupus familiaris]	6	3	3	53.1	9.01	-	-	0	36400	12500	2.9	-	-	0	1020000	872000	1.2	-	-	0	2730000	1070000	2.6	3	Y	Y	N	N
XP_848746	CD14	monocyte differentiation antigen CD14 [Canis lupus familiaris]	4	1	1	39.8	7.02	ID only	ID only	1	-	-	0	-	-	0	-	-	0	-	-	0	-	-	0	1	N	N	N	N
XP_005639245	MMRN1	multimerin-1 isoform X1 [Canis lupus familiaris]	23	29	29	137.3	7.05	4660000	1110000	4.2	29000000	2360000	12.3	32400000	5790000	5.6	64900000	15000000	4.3	34000000	9990000	3.4	84500000	14700000	5.7	3	Y	Y	Y	Y
XP_022272420	MCTP1	multiple C2 and transmembrane domain-containing protein 1 isoform X1 [Canis lupus familiaris]	1	1	1	91.5	7.46	-	-	0	-	-	0	-	-	0	-	-	0	-	-	0	325000	275000	1.2	1	N	Y	N	N
XP_022276326	MSH4	mutS protein homolog 4 isoform X1 [Canis lupus familiaris]	3	1	1	90.6	6.68	-	-	0	ID only	ID only	1	-	-	0	-	-	0	-	-	0	-	-	0	1	N	N	N	N
XP_022261727	BIN1	myc box-dependent-interacting protein 1 isoform X1 [Canis lupus familiaris]	15	14	14	65	5.2	46200000	11400000	4.1	1390000	679000	2	-	-	0	-	-	0	-	-	0	-	-	0	1	N	Y	N	N
XP_022261729	BIN1	myc box-dependent-interacting protein 1 isoform X3 [Canis lupus familiaris]	33	17	17	61.6	5.08	-	-	0	-	-	0	49100000	17400000	2.8	9100000	5630000	1.6	85700000	46500000	1.8	11800000	7690000	1.5	2	N	Y	N	N
XP_854821	MYCT1	myc target protein 1 [Canis lupus familiaris]	11	3	3	26.4	9.33	-	-	0	-	-	0	-	-	0	551000	335000	1.6	-	-	0	1290000	700000	1.8	2	N	Y	N	N
XP_022264177	MYD88	myeloid differentiation primary response protein MyD88 [Canis lupus familiaris]	7	1	1	33.5	6.76	-	-	0	-	-	0	-	-	0	-	-	0	-	-	0	ID only	ID only	1	1	N	Y	N	N
XP_022283237	LOC100855913; MYADM	myeloid-associated differentiation marker [Canis lupus familiaris]	7	1	1	35.2	8.41	-	-	0	471000	304000	1.5	-	-	0	1740000	1560000	1.1	ID only	ID only	1	3130000	2370000	1.3	3	N	Y	N	N
XP_854682	C20H19orf10; MYDGF	myeloid-derived growth factor [Canis lupus familiaris]	34	4	4	18.8	8.43	-	-	0	-	-	0	288000	199000	1.5	-	-	0	2800000	965000	2.9	-	-	0	2	N	Y	N	N
XP_022278900	MPO	myeloperoxidase [Canis lupus familiaris]	5	4	4	81.1	8.81	-	-	0	19500	17200	1.1	-	-	0	451000	468000	1	-	-	0	346000	182000	1.9	3	N	N	N	N
XP_013966405	MYL1	myosin light chain 1/3, skeletal muscle isoform isoform X1 [Canis lupus familiaris]	21	2	1	22.5	5.08	-	-	0	-	-	0	-	-	0	-	-	0	-	-	0	ID only	ID only	1	1	N	Y	N	N
XP_013972627	MYL6B	myosin light chain 6B [Canis lupus familiaris]	6	1	1	22.9	5.53	-	-	0	-	-	0	108000	72300	1.5	145000	118000	1.2	130000	99100	1.3	146000	115000	1.3	2	N	Y	N	N
XP_013965708	MYLK	myosin light chain kinase, smooth muscle isoform X1 [Canis lupus familiaris]	3	12	11	219.9	5.96	1530000	625000	2.5	77300	52300	1.5	5180000	1800000	2.9	145000	102000	1.4	9070000	4160000	2.2	509000	443000	1.2	3	Y	Y	N	N
XP_531631	MYL6	myosin light polypeptide 6 isoform X1 [Canis lupus familiaris]	79	11	11	17	4.55	19300000	6030000	3.2	9210000	13400000	0.7	58000000	41200000	1.4	83400000	75900000	1.1	113000000	60000000	1.9	99700000	89800000	1.1	3	N	Y	Y	Y
NP_001239095	MYL9	myosin regulatory light polypeptide 9 [Canis lupus familiaris]	55	10	6	19.8	4.92	94300	70000	1.3	3380000	3850000	0.9	9560000	4780000	2	5600000	4460000	1.3	17300000	6930000	2.5	21300000	13800000	1.5	3	Y	Y	Y	N
XP_848839	MYL12A; LOC607207	myosin regulatory light polypeptide 9 isoform X1 [Canis lupus familiaris]	61	9	5	20.5	4.75	6030000	1640000	3.7	2270000	2330000	1	16300000	7700000	2.1	32400000	24000000	1.3	36000000	12000000	3	32300000	24400000	1.3	3	Y	Y	N	N
XP_013969069	MYH10	myosin-10 isoform X1 [Canis lupus familiaris]	9	17	3	232.5	5.55	-	-	0	ID only	ID only	1	-	-	0	-	-	0	-	-	0	187000	178000	1.1	2	N	Y	N	N
NP_001104237	MYH9	myosin-9 [Canis lupus familiaris]	63	163	163	226.3	5.6	169000000	84800000	2	-	-	0	656000000	349000000	1.9	891000000	934000000	1	1170000000	781000000	1.5	1160000000	1170000000	1	3	N	Y	Y	Y
NP_001002989	MTPN	myotrophin [Canis lupus familiaris]	14	9	9	12.9	5.81	49300000	8220000	6	172000	56500	3	60800000	26300000	2.3	294000	388000	0.8	96100000	50500000	1.9	437000	422000	1	3	Y	Y	Y	N
XP_855209	MTM1	myotubularin isoform X1 [Canis lupus familiaris]	3	1	1	69.9	8.31	-	-	0	38500	7090	5.4	-	-	0	-	-	0	-	-	0	-	-	0	1	N	Y	N	N
XP_013973699	MARCKS	myristoylated alanine-rich C-kinase substrate [Canis lupus familiaris]	6	1	1	33.8	4.37	-	-	0	-	-	0	-	-	0	16000	21400	0.8	-	-	0	-	-	0	1	N	Y	N	N
XP_549180	NAGK	N-acetyl-D-glucosamine kinase isoform X2 [Canis lupus familiaris]	23	5	5	37.3	5.6	-	-	0	-	-	0	1430000	1070000	1.3	-	-	0	2190000	1580000	1.4	-	-	0	2	N	Y	N	N
XP_544673	GALK2	N-acetylgalactosamine kinase isoform X1 [Canis lupus familiaris]	50	11	11	50.5	6.15	ID only	ID only	1	-	-	0	3330000	1300000	2.6	-	-	0	6620000	4230000	1.6	-	-	0	3	N	Y	N	N
XP_531660	GNS	N-acetylglucosamine-6-sulfatase [Canis lupus familiaris]	12	5	5	55.5	8.28	2040000	21900	93.2	-	-	0	3020000	538000	5.6	-	-	0	5840000	598000	9.8	-	-	0	3	Y	Y	N	N
XP_855355	RENBP	N-acylglucosamine 2-epimerase [Canis lupus familiaris]	11	13	13	49	5.82	25900000	6890000	3.8	750000	307000	2.4	26700000	14700000	1.8	667000	233000	2.9	96400000	70500000	1.4	1860000	740000	2.5	3	Y	Y	N	N
XP_853470	NAA10	N-alpha-acetyltransferase 10 isoform X1 [Canis lupus familiaris]	22	2	2	26.4	5.64	ID only	ID only	1	-	-	0	248000	86800	2.9	-	-	0	785000	518000	1.5	-	-	0	3	N	Y	N	N
XP_005630078	AGA	N(4)-(beta-N-acetylglucosaminyl)-L-asparaginase [Canis lupus familiaris]	24	6	6	36.7	6.62	1070000	80200	13.4	-	-	0	2980000	347000	8.6	-	-	0	3780000	124000	30.6	-	-	0	3	Y	Y	N	N
XP_013973803	DDAH2	N(G),N(G)-dimethylarginine dimethylaminohydrolase 2 [Canis lupus familiaris]	8	1	1	29.7	6.01	-	-	0	-	-	0	ID only	ID only	1	-	-	0	ID only	ID only	1	-	-	0	2	N	Y	N	N
XP_013971782	SLC9A3R1	Na(+)/H(+) exchange regulatory cofactor NHE-RF1 isoform X1 [Canis lupus familiaris]	4	10	10	39.4	6.29	6360000	862000	7.4	-	-	0	3700000	2150000	1.7	252000	38800	6.5	5900000	3710000	1.6	174000	77900	2.2	3	Y	Y	N	N
XP_005619937	NLRP1	NACHT, LRR and PYD domains-containing protein 1 isoform X1 [Canis lupus familiaris]	2	1	1	159.7	7.06	ID only	ID only	1	-	-	0	-	-	0	-	-	0	-	-	0	-	-	0	1	N	N	N	N
NP_001300734	SIRT5	NAD-dependent protein deacylase sirtuin-5, mitochondrial [Canis lupus familiaris]	5	10	10	33.9	8.28	2390000	477000	5	-	-	0	1140000	496000	2.3	ID only	ID only	1	6660000	3750000	1.8	ID only	ID only	1	3	Y	Y	N	N
XP_536481	NNT	NAD(P) transhydrogenase, mitochondrial isoform X1 [Canis lupus familiaris]	1	1	1	113.8	8.1	-	-	0	-	-	0	-	-	0	-	-	0	-	-	0	158000	66700	2.4	1	N	Y	N	N
XP_853617	NQO1	NAD(P)H dehydrogenase [quinone] 1 [Canis lupus familiaris]	14	3	3	30.6	8.47	187000	28700	6.5	-	-	0	511000	186000	2.8	-	-	0	369000	209000	1.8	-	-	0	3	Y	N	N	N
XP_854934	APOA1BP; NAXE	NAD(P)H-hydrate epimerase [Canis lupus familiaris]	22	4	4	31.9	7.66	1140000	176000	6.5	-	-	0	3440000	2210000	1.6	-	-	0	894000	482000	1.9	-	-	0	3	N	Y	N	N
NP_001041549	CYB5R3	NADH-cytochrome b5 reductase 3 [Canis lupus familiaris]	22	6	6	34.1	8.15	26400	ID only	10	-	-	0	2570000	1160000	2.2	449000	179000	2.5	9450000	5050000	1.9	2020000	1300000	1.6	3	Y	Y	N	N
XP_859649	NRD1; NRDC	nardilysin [Canis lupus familiaris]	2	1	1	132.3	4.92	-	-	0	-	-	0	149000	111000	1.4	-	-	0	165000	66800	2.5	-	-	0	2	N	Y	N	N
XP_022279697	NACA	nascent polypeptide-associated complex subunit alpha isoform X1 [Canis lupus familiaris]	7	1	1	24.6	4.56	208000	74700	2.8	-	-	0	ID only	ID only	1	ID only	ID only	1	315000	86900	3.6	-	-	0	3	Y	Y	N	N
XP_535990	NCKAP1	nck-associated protein 1 isoform X1 [Canis lupus familiaris]	11	8	8	125.8	6.44	-	-	0	ID only	29100	0.5	-	-	0	1810000	920000	2	-	-	0	2170000	1150000	1.9	3	N	Y	N	N
XP_013975394	NUB1	NEDD8 ultimate buster 1 isoform X1 [Canis lupus familiaris]	1	1	1	70.9	5.66	447000	56600	7.9	414000	45200	9.2	-	-	0	-	-	0	-	-	0	-	-	0	1	N	Y	N	N
XP_864203	UBA3	NEDD8-activating enzyme E1 catalytic subunit isoform X1 [Canis lupus familiaris]	13	4	4	51.8	5.45	1130000	42700	26.5	-	-	0	614000	353000	1.7	-	-	0	985000	592000	1.7	-	-	0	3	N	Y	N	N
XP_003639123	NAE1	NEDD8-activating enzyme E1 regulatory subunit isoform X1 [Canis lupus familiaris]	13	3	3	60.3	5.59	-	-	0	-	-	0	ID only	ID only	1	-	-	0	ID only	ID only	1	-	-	0	2	N	Y	N	N
XP_541337	UBE2M	NEDD8-conjugating enzyme Ubc12 [Canis lupus familiaris]	13	2	2	20.9	7.69	-	-	0	-	-	0	595000	160000	3.7	-	-	0	1080000	228000	4.7	-	-	0	2	Y	Y	N	N
XP_013968283	SYNE1	nesprin-1 [Canis lupus familiaris]	0	1	1	1014	5.53	2940000	296000	9.9	-	-	0	-	-	0	ID only	ID only	1	-	-	0	-	-	0	2	N	Y	N	N
XP_013970781	NES	nestin [Canis lupus familiaris]	1	1	1	196.6	4.42	-	-	0	ID only	ID only	1	-	-	0	-	-	0	-	-	0	-	-	0	1	N	N	N	N
XP_532655	NTN4	netrin-4 isoform X1 [Canis lupus familiaris]	2	1	1	69.8	8.12	-	-	0	-	-	0	-	-	0	-	-	0	7300000	678000	10.8	-	-	0	1	N	N	N	N
XP_013962845	NBEA	neurobeachin isoform X1 [Canis lupus familiaris]	1	5	5	331.3	6.23	-	-	0	28900	8980	3.2	-	-	0	529000	200000	2.6	-	-	0	385000	124000	3.1	3	Y	N	N	N
XP_022263056	NBEAL2	neurobeachin-like protein 2 [Canis lupus familiaris]	2	4	4	298.7	6.55	-	-	0	51000	15900	3.2	-	-	0	136000	99400	1.4	197000	129000	1.5	ID only	ID only	1	3	N	Y	N	N
XP_022265690	NLN	neurolysin, mitochondrial isoform X1 [Canis lupus familiaris]	2	1	1	80.9	6.16	-	-	0	-	-	0	-	-	0	-	-	0	63400	52500	1.2	-	-	0	1	N	Y	N	N
XP_013976277	NRCAM	neuronal cell adhesion molecule isoform X1 [Canis lupus familiaris]	2	13	13	134.5	5.83	2620000	842000	3.1	-	-	0	7250000	2230000	3.3	-	-	0	27200000	7650000	3.6	ID only	ID only	1	3	Y	N	N	N
XP_535142	NRP1	neuropilin-1 isoform X2 [Canis lupus familiaris]	10	5	5	103.3	5.73	830000	407000	2	1050000	199000	5.2	2450000	600000	4.1	1990000	719000	2.8	3690000	1190000	3.1	3540000	954000	3.7	3	Y	N	N	N
XP_005639944	SERPINI1	neuroserpin isoform X1 [Canis lupus familiaris]	18	19	19	49.4	5.16	149000000	4510000	33.1	218000	28300	7.7	101000000	7680000	13.1	2710000	725000	3.7	222000000	28200000	7.9	3530000	1390000	2.5	3	Y	N	N	N
XP_540905	GANAB	neutral alpha-glucosidase AB isoform X1 [Canis lupus familiaris]	3	18	18	108.8	6.18	-	-	0	-	-	0	-	-	0	-	-	0	16300000	13500000	1.2	ID only	ID only	1	1	N	Y	N	N
XP_867560	GANAB	neutral alpha-glucosidase AB isoform X2 [Canis lupus familiaris]	8	20	20	106.3	6.06	398000	523000	0.8	ID only	9310	0.5	10600000	8260000	1.3	366000	198000	1.9	-	-	0	-	-	0	2	N	Y	N	N
XP_538511	SLC1A4	neutral amino acid transporter A [Canis lupus familiaris]	3	1	1	55.5	6.3	-	-	0	-	-	0	-	-	0	ID only	ID only	1	-	-	0	148000	90900	1.6	2	N	N	N	N
NP_001003378	ELANE	neutrophil elastase precursor [Canis lupus familiaris]	5	1	1	29.9	10.65	-	-	0	-	-	0	-	-	0	-	-	0	-	-	0	ID only	ID only	1	1	N	N	N	N
XP_544027	NHLRC2	NHL repeat-containing protein 2 isoform X1 [Canis lupus familiaris]	2	7	7	82.9	5.44	86600	57500	1.5	-	-	0	5150000	2520000	2	ID only	ID only	1	5930000	3560000	1.7	ID only	ID only	1	3	N	Y	N	N
XP_851563	FAM129B	niban-like protein 1 [Canis lupus familiaris]	3	4	4	84.3	5.9	-	-	0	-	-	0	349000	ID only	10	ID only	ID only	1	719000	118000	6.1	114000	81100	1.4	2	Y	N	N	N
XP_022262599	FAM129C	niban-like protein 2 [Canis lupus familiaris]	1	1	1	76	8.27	-	-	0	-	-	0	-	-	0	ID only	ID only	1	-	-	0	-	-	0	1	N	N	N	N
XP_013962192	NMNAT3	nicotinamide/nicotinic acid mononucleotide adenylyltransferase 3 isoform X1 [Canis lupus familiaris]	9	2	2	37.1	9.73	-	-	0	100000	25200	4	-	-	0	156000	61200	2.5	ID only	ID only	1	326000	140000	2.3	3	Y	Y	N	N
XP_851754	NAPRT1; NAPRT	nicotinate phosphoribosyltransferase [Canis lupus familiaris]	22	6	6	57.8	6.02	483000	211000	2.3	-	-	0	369000	318000	1.2	-	-	0	1410000	787000	1.8	-	-	0	3	N	Y	N	N
XP_546076	NID1	nidogen-1 [Canis lupus familiaris]	37	47	47	136.3	5.34	66200000	13000000	5.1	16900000	1520000	11.1	451000000	71200000	6.3	65300000	12400000	5.3	559000000	99000000	5.7	61100000	13400000	4.6	3	Y	Y	Y	N
XP_013971380	NID2	nidogen-2 [Canis lupus familiaris]	1	1	1	160.1	5.68	-	-	0	-	-	0	ID only	ID only	1	-	-	0	-	-	0	-	-	0	1	N	Y	Y	N
XP_013966411	NIF3L1	NIF3-like protein 1 isoform X1 [Canis lupus familiaris]	3	1	1	41.8	6.95	ID only	ID only	1	-	-	0	-	-	0	-	-	0	-	-	0	-	-	0	1	N	Y	N	N
XP_005634226	NINL	ninein-like protein isoform X2 [Canis lupus familiaris]	1	1	1	130.1	4.94	-	-	0	-	-	0	-	-	0	ID only	ID only	1	-	-	0	-	-	0	1	N	N	N	N
XP_546344	NIPBL	nipped-B-like protein isoform X1 [Canis lupus familiaris]	1	1	1	315.9	7.96	-	-	0	-	-	0	-	-	0	ID only	733000	0.5	-	-	0	-	-	0	1	N	N	N	N
XP_022271139	NIT1	nitrilase homolog 1 isoform X1 [Canis lupus familiaris]	5	1	1	36.9	7.43	-	-	0	-	-	0	-	-	0	-	-	0	ID only	ID only	1	-	-	0	1	N	Y	N	N
XP_013968846	NLRX1	NLR family member X1 isoform X1 [Canis lupus familiaris]	1	1	1	107	8.16	-	-	0	-	-	0	-	-	0	-	-	0	-	-	0	ID only	ID only	1	1	N	Y	N	N
XP_547146	NMRAL1	nmrA-like family domain-containing protein 1 isoform X1 [Canis lupus familiaris]	6	2	2	33	6.55	-	-	0	-	-	0	540000	216000	2.5	-	-	0	1760000	742000	2.4	-	-	0	2	Y	N	N	N
XP_005626843	GBA2	non-lysosomal glucosylceramidase isoform X1 [Canis lupus familiaris]	1	1	1	113.6	5.88	-	-	0	-	-	0	-	-	0	-	-	0	-	-	0	ID only	ID only	1	1	N	Y	N	N
XP_866084	SCP2	non-specific lipid-transfer protein isoform X1 [Canis lupus familiaris]	6	3	3	58.2	7.87	-	-	0	-	-	0	87300	15000	5.8	-	-	0	284000	179000	1.6	-	-	0	2	N	Y	N	N
XP_003433246	NSFL1C	NSFL1 cofactor p47 isoform X1 [Canis lupus familiaris]	4	5	5	40.8	5.25	937000	302000	3.1	-	-	0	670000	229000	2.9	46600	48300	1	2140000	1020000	2.1	ID only	42400	0.5	3	Y	Y	N	N
XP_544475	NUDC	nuclear migration protein nudC [Canis lupus familiaris]	5	1	1	38.3	5.52	ID only	ID only	1	-	-	0	122000	ID only	10	-	-	0	-	-	0	-	-	0	2	N	Y	N	N
XP_005616873	LOC102151589	nuclear pore-associated protein 1-like [Canis lupus familiaris]	1	1	1	130.1	10.86	-	-	0	-	-	0	ID only	ID only	1	-	-	0	-	-	0	-	-	0	1	N	N	N	N
XP_536812	NUTF2	nuclear transport factor 2 [Canis lupus familiaris]	17	2	2	14.5	5.38	-	-	0	-	-	0	1430000	591000	2.4	-	-	0	4070000	2970000	1.4	-	-	0	2	N	Y	N	N
XP_005618292	YBX1; LOC479011	nuclease-sensitive element-binding protein 1 [Canis lupus familiaris]	9	1	1	36	9.88	-	-	0	-	-	0	-	-	0	-	-	0	ID only	ID only	1	-	-	0	1	N	N	N	N
XP_005624398	NME1	nucleoside diphosphate kinase A isoform X1 [Canis lupus familiaris]	53	6	4	17.2	6.01	2460000	663000	3.7	128000	43600	2.9	4370000	3440000	1.3	220000	120000	1.8	4990000	2730000	1.8	-	-	0	3	N	Y	N	N
NP_001019809	NME2	nucleoside diphosphate kinase B [Canis lupus familiaris]	14	11	9	17.4	7.99	40900000	14400000	2.8	292000	133000	2.2	73800000	54900000	1.3	3730000	1640000	2.3	81300000	39000000	2.1	3370000	3190000	1.1	3	Y	Y	Y	N
XP_022283816	NAP1L1	nucleosome assembly protein 1-like 1 isoform X1 [Canis lupus familiaris]	23	10	8	45.3	4.46	25500000	4210000	6.1	ID only	ID only	1	6630000	2100000	3.2	-	-	0	15300000	8050000	1.9	ID only	124000	0.5	3	Y	Y	Y	N
XP_013976669	NAP1L4	nucleosome assembly protein 1-like 4 isoform X1 [Canis lupus familiaris]	12	10	8	43.9	4.67	5590000	650000	8.6	144000	34800	4.1	3270000	1550000	2.1	505000	229000	2.2	18200000	9470000	1.9	1050000	407000	2.6	3	Y	Y	N	N
XP_536440	NUDCD2	nudC domain-containing protein 2 [Canis lupus familiaris]	11	1	1	21.3	5.73	-	-	0	-	-	0	ID only	ID only	1	-	-	0	ID only	ID only	1	-	-	0	2	N	Y	N	N
XP_850320	OLA1	obg-like ATPase 1 [Canis lupus familiaris]	24	8	8	45.6	8.06	3650000	544000	6.7	-	-	0	3660000	809000	4.5	-	-	0	7420000	4100000	1.8	-	-	0	3	Y	Y	N	N
XP_005619809	REXO2	oligoribonuclease, mitochondrial [Canis lupus familiaris]	6	1	1	26.8	7.46	-	-	0	283000	10100	28.1	-	-	0	-	-	0	-	-	0	-	-	0	1	N	Y	N	N
XP_005639451	NIT2	omega-amidase NIT2 [Canis lupus familiaris]	21	6	6	31.2	7.64	ID only	ID only	1	-	-	0	3290000	2270000	1.5	-	-	0	3890000	2380000	1.6	-	-	0	3	N	Y	N	N
XP_005615910	OSTF1	osteoclast-stimulating factor 1 [Canis lupus familiaris]	31	3	3	19.2	8.46	411000	86100	4.8	-	-	0	1790000	503000	3.6	-	-	0	5440000	2450000	2.2	-	-	0	3	Y	Y	N	N
XP_544171	OTUD6B	OTU domain-containing protein 6B isoform X1 [Canis lupus familiaris]	3	1	1	43.5	9.36	-	-	0	-	-	0	193000	82000	2.4	ID only	ID only	1	384000	221000	1.7	-	-	0	2	N	Y	N	N
XP_005639536	CD200	OX-2 membrane glycoprotein [Canis lupus familiaris]	5	1	1	33	9.1	-	-	0	95300	84900	1.1	-	-	0	321000	182000	1.8	-	-	0	561000	286000	2	3	N	N	N	N
XP_003431819	OXR1	oxidation resistance protein 1 isoform X1 [Canis lupus familiaris]	4	3	3	98.2	5.44	-	-	0	-	-	0	200000	58300	3.4	ID only	ID only	1	261000	141000	1.8	63800	59700	1.1	2	N	Y	N	N
XP_003640171	LOC100856388; OSBPL11	oxysterol-binding protein-related protein 11 [Canis lupus familiaris]	3	1	1	84.3	6.98	-	-	0	-	-	0	-	-	0	ID only	ID only	1	-	-	0	-	-	0	1	N	Y	N	N
XP_013970437	SELP	P-selectin isoform X1 [Canis lupus familiaris]	23	19	19	90.8	6.98	6580000	1720000	3.8	1410000	257000	5.5	27800000	6170000	4.5	2450000	883000	2.8	49500000	11500000	4.3	9010000	2930000	3.1	3	Y	Y	Y	N
XP_022279204	P2RX1	P2X purinoceptor 1 isoform X1 [Canis lupus familiaris]	7	1	1	45.3	7.94	-	-	0	20500	11100	1.8	-	-	0	185000	ID only	10	-	-	0	ID only	ID only	1	3	N	Y	N	N
NP_001010944	PPT1	palmitoyl-protein thioesterase 1 precursor [Canis lupus familiaris]	5	1	1	34.2	6.34	-	-	0	-	-	0	319000	ID only	10	-	-	0	473000	ID only	10	-	-	0	2	Y	N	N	N
XP_848289	LOC480825; LOC607460	pancreatic alpha-amylase [Canis lupus familiaris]	3	1	1	57.7	6.89	247000	ID only	10	-	-	0	-	-	0	-	-	0	-	-	0	-	-	0	1	N	N	N	N
XP_013964251	PDLIM1	PDZ and LIM domain protein 1 [Canis lupus familiaris]	39	15	15	60.4	9.7	10300000	2380000	4.3	5570000	575000	9.7	11900000	3680000	3.2	9370000	6090000	1.5	31300000	17100000	1.8	19000000	13500000	1.4	3	Y	Y	Y	Y
XP_022269204	PDLIM5	PDZ and LIM domain protein 5 isoform X1 [Canis lupus familiaris]	18	8	8	78.8	8.79	1710000	733000	2.3	204000	76800	2.7	1760000	255000	6.9	1750000	875000	2	3390000	1540000	2.2	-	-	0	3	Y	Y	N	N
XP_022269212	PDLIM5	PDZ and LIM domain protein 5 isoform X10 [Canis lupus familiaris]	20	7	7	65.2	8.47	-	-	0	-	-	0	-	-	0	-	-	0	-	-	0	1480000	1330000	1.1	1	N	Y	N	N
XP_022273696	PDLIM7	PDZ and LIM domain protein 7 [Canis lupus familiaris]	13	4	4	48.4	8.76	-	-	0	-	-	0	-	-	0	ID only	ID only	1	-	-	0	248000	192000	1.3	2	N	Y	N	N
XP_013966928	LOC491973	PDZ and LIM domain protein 7-like [Canis lupus familiaris]	2	1	1	49.4	8.18	522000	34100	15.3	-	-	0	-	-	0	90600	30400	3	-	-	0	464000	247000	1.9	3	N	Y	N	N
XP_855038	PGLYRP1	peptidoglycan recognition protein 1 [Canis lupus familiaris]	7	1	1	21.7	8.21	-	-	0	-	-	0	ID only	ID only	1	-	-	0	-	-	0	-	-	0	1	N	N	N	N
XP_022273024	PAM	peptidyl-glycine alpha-amidating monooxygenase [Canis lupus familiaris]	7	4	4	108.3	6.44	-	-	0	-	-	0	296000	32500	9.1	-	-	0	587000	60900	9.7	-	-	0	2	Y	N	N	N
XP_013967506	PPIA	peptidyl-prolyl cis-trans isomerase A [Canis lupus familiaris]	38	10	10	26	10.23	56400000	28300000	2	940000	497000	1.9	332000000	211000000	1.6	10500000	3800000	2.8	470000000	171000000	2.7	10400000	7710000	1.3	3	Y	Y	Y	Y
XP_852389	PPIB	peptidyl-prolyl cis-trans isomerase B [Canis lupus familiaris]	28	17	17	23.8	9.32	31800000	13700000	2.3	ID only	69000	0.5	52400000	33400000	1.6	-	-	0	78800000	28500000	2.8	215000	121000	1.8	3	Y	Y	Y	N
XP_022280918	PPIC	peptidyl-prolyl cis-trans isomerase C isoform X1 [Canis lupus familiaris]	5	8	8	28	7.94	4280000	1060000	4	-	-	0	20300000	5370000	3.8	-	-	0	31200000	5820000	5.4	409000	308000	1.3	3	Y	N	N	N
XP_532704	PPID	peptidyl-prolyl cis-trans isomerase D [Canis lupus familiaris]	18	5	5	41	7.39	ID only	ID only	1	-	-	0	3200000	1480000	2.2	-	-	0	3940000	2880000	1.4	-	-	0	3	N	Y	N	N
XP_022273309	PPIF	peptidyl-prolyl cis-trans isomerase F, mitochondrial [Canis lupus familiaris]	10	1	1	11.3	8.65	-	-	0	-	-	0	146000	140000	0.1	-	-	0	849000	167000	5.1	70800	45600	1.6	2	N	Y	N	N
NP_001239119	FKBP1A	peptidyl-prolyl cis-trans isomerase FKBP1A [Canis lupus familiaris]	13	7	7	11.9	8.15	10000000	2450000	4.1	-	-	0	7230000	3930000	1.8	ID only	ID only	1	8450000	5330000	1.6	ID only	ID only	1	3	N	Y	N	N
XP_853295	FKBP2	peptidyl-prolyl cis-trans isomerase FKBP2 isoform X1 [Canis lupus familiaris]	8	2	2	17.5	9.63	-	-	0	-	-	0	899000	277000	3.2	-	-	0	1470000	432000	3.4	-	-	0	2	Y	Y	N	N
XP_537428	FKBP3; LOC480306	peptidyl-prolyl cis-trans isomerase FKBP3 isoform X1 [Canis lupus familiaris]	15	2	2	25.2	9.2	1040000	275000	3.8	-	-	0	784000	361000	2.2	-	-	0	1920000	793000	2.4	-	-	0	3	Y	Y	N	N
XP_534923	FKBP4	peptidyl-prolyl cis-trans isomerase FKBP4 isoform X1 [Canis lupus familiaris]	5	9	9	51.5	5.57	4820000	721000	6.7	ID only	11200	0.5	1150000	382000	3	-	-	0	4980000	3050000	1.6	ID only	ID only	1	3	Y	Y	N	N
XP_848237	PPIH	peptidyl-prolyl cis-trans isomerase H [Canis lupus familiaris]	13	2	2	19.2	8.07	-	-	0	-	-	0	33300	12200	2.7	-	-	0	292000	4390	66.4	-	-	0	2	Y	Y	N	N
XP_542080	PIN1	peptidyl-prolyl cis-trans isomerase NIMA-interacting 1 [Canis lupus familiaris]	9	6	6	18.3	8.82	-	-	0	-	-	0	2590000	1510000	1.7	191000	83500	2.3	4390000	1430000	3.1	197000	190000	1	2	N	Y	N	N
XP_022272117	PIN4	peptidyl-prolyl cis-trans isomerase NIMA-interacting 4, partial [Canis lupus familiaris]	8	2	2	19.5	8.92	-	-	0	-	-	0	ID only	ID only	1	-	-	0	ID only	ID only	1	-	-	0	2	N	Y	N	N
XP_013973878	PPIL1	peptidyl-prolyl cis-trans isomerase-like 1 [Canis lupus familiaris]	10	3	3	18.2	7.99	ID only	13300	0.5	-	-	0	2020000	1270000	1.6	-	-	0	3050000	1270000	2.4	116000	145000	0.8	3	N	Y	N	N
XP_849186	PPIL3	peptidyl-prolyl cis-trans isomerase-like 3 isoform X1 [Canis lupus familiaris]	27	4	4	18.1	6.79	127000	20800	6.1	-	-	0	1040000	701000	1.5	-	-	0	497000	206000	2.4	-	-	0	3	Y	Y	N	N
XP_022283369	PRDX1	peroxiredoxin-1 isoform X1 [Canis lupus familiaris]	22	10	8	22.1	8.13	17500000	6810000	2.6	ID only	ID only	1	21200000	10200000	2.1	-	-	0	74400000	25600000	2.9	2400000	2000000	1.2	3	Y	Y	Y	N
XP_022262693	LOC100856470; PRDX2	peroxiredoxin-2 isoform X1 [Canis lupus familiaris]	44	10	9	26	6.06	627000	382000	1.6	-	-	0	123000000	49200000	2.5	3210000	2020000	1.6	15900000	5090000	3.1	-	-	0	3	Y	Y	N	N
XP_022271459	LOC100856588; PRDX4	peroxiredoxin-4 isoform X1 [Canis lupus familiaris]	21	5	5	30.9	7.85	869000	247000	3.5	562000	126000	4.5	1380000	790000	1.7	4890000	2670000	1.8	3040000	2100000	1.5	-	-	0	3	N	Y	N	N
XP_003640291	LOC100856588; PRDX4	peroxiredoxin-4 isoform X2 [Canis lupus familiaris]	33	7	6	30.4	6.95	-	-	0	-	-	0	-	-	0	-	-	0	-	-	0	5430000	2880000	1.9	1	N	Y	N	N
XP_533241	PRDX5	peroxiredoxin-5, mitochondrial [Canis lupus familiaris]	34	8	8	36.8	10.84	2900000	573000	5.1	-	-	0	6500000	2720000	2.4	-	-	0	10800000	2750000	3.9	-	-	0	3	Y	Y	N	N
XP_537190	PRDX6	peroxiredoxin-6 [Canis lupus familiaris]	8	10	10	17.6	5.43	10900000	2620000	4.2	-	-	0	36700000	22300000	1.6	-	-	0	52400000	29000000	1.8	ID only	ID only	1	3	N	Y	Y	N
XP_003435209	ACOX1	peroxisomal acyl-coenzyme A oxidase 1 isoform X2 [Canis lupus familiaris]	3	1	1	74.7	7.74	-	-	0	-	-	0	-	-	0	-	-	0	82900	62500	1.3	-	-	0	1	N	Y	N	N
XP_005626402	HSD17B4	peroxisomal multifunctional enzyme type 2 isoform X1 [Canis lupus familiaris]	17	7	7	82.8	8.31	-	-	0	-	-	0	-	-	0	ID only	ID only	1	-	-	0	1750000	1450000	1.2	2	N	Y	N	N
XP_531860	HSD17B4	peroxisomal multifunctional enzyme type 2 isoform X2 [Canis lupus familiaris]	5	2	2	79.6	8.06	-	-	0	ID only	40700	0.5	-	-	0	-	-	0	-	-	0	-	-	0	1	N	Y	N	N
XP_022272384	LOC480798	peroxisomal N(1)-acetyl-spermine/spermidine oxidase-like isoform X1 [Canis lupus familiaris]	12	1	1	16.1	8.06	-	-	0	-	-	0	-	-	0	-	-	0	306000	181000	1.7	-	-	0	1	N	Y	N	N
XP_531782	PDCL3	phosducin-like protein 3 [Canis lupus familiaris]	10	2	2	27.6	4.65	ID only	ID only	1	-	-	0	-	-	0	-	-	0	336000	205000	1.6	-	-	0	2	N	Y	N	N
XP_005629315	SLC25A3	phosphate carrier protein, mitochondrial isoform X1 [Canis lupus familiaris]	3	1	1	39.9	9.39	-	-	0	-	-	0	-	-	0	361000	257000	1.4	-	-	0	432000	263000	1.6	2	N	Y	N	N
XP_005634873	CDS2	phosphatidate cytidylyltransferase 2 [Canis lupus familiaris]	3	1	1	64.6	9.04	-	-	0	-	-	0	-	-	0	-	-	0	-	-	0	ID only	ID only	1	1	N	Y	N	N
NP_001041557	PEBP1	phosphatidylethanolamine-binding protein 1 [Canis lupus familiaris]	17	11	11	20.9	7.49	3040000	811000	3.8	-	-	0	26100000	14700000	1.8	-	-	0	37500000	14000000	2.7	ID only	ID only	1	3	Y	Y	N	N
XP_013964297	PIK3R1	phosphatidylinositol 3-kinase regulatory subunit alpha isoform X1 [Canis lupus familiaris]	2	2	2	83.7	6.16	-	-	0	-	-	0	233000	88800	2.6	357000	214000	1.7	-	-	0	336000	172000	2	2	N	Y	N	N
XP_852406	PIK3R2	phosphatidylinositol 3-kinase regulatory subunit beta [Canis lupus familiaris]	2	1	1	81.4	6.39	-	-	0	-	-	0	-	-	0	-	-	0	270000	229000	1.2	-	-	0	1	N	N	N	N
XP_005635922	INPP5D	phosphatidylinositol 3,4,5-trisphosphate 5-phosphatase 1 [Canis lupus familiaris]	6	4	4	133.1	8.22	-	-	0	48600	16800	2.9	ID only	ID only	1	672000	340000	2	659000	230000	2.9	662000	423000	1.6	3	Y	Y	N	N
XP_013966701	PIK3C2B	phosphatidylinositol 4-phosphate 3-kinase C2 domain-containing subunit beta [Canis lupus familiaris]	1	1	1	185.1	7.02	-	-	0	-	-	0	-	-	0	64400	25900	2.5	-	-	0	-	-	0	1	N	N	N	N
XP_850532	PIP4K2A	phosphatidylinositol 5-phosphate 4-kinase type-2 alpha [Canis lupus familiaris]	8	5	2	46.2	6.99	1710000	330000	5.2	-	-	0	1160000	323000	3.6	1180000	218000	5.4	1820000	1220000	1.5	927000	142000	6.5	3	Y	Y	N	N
XP_548154	PIP4K2B	phosphatidylinositol 5-phosphate 4-kinase type-2 beta isoform X1 [Canis lupus familiaris]	10	5	1	47.3	7.33	ID only	ID only	1	ID only	ID only	1	1590000	406000	3.9	-	-	0	2460000	1250000	2	-	-	0	3	Y	Y	N	N
XP_005636443	PITPNB	phosphatidylinositol transfer protein beta isoform isoform X1 [Canis lupus familiaris]	24	4	4	31.6	6.25	-	-	0	-	-	0	-	-	0	-	-	0	3170000	1430000	2.2	-	-	0	1	N	Y	N	N
XP_022282008	PGM3	phosphoacetylglucosamine mutase isoform X1 [Canis lupus familiaris]	2	1	1	62.4	6.37	231000	209000	1.1	-	-	0	-	-	0	-	-	0	-	-	0	-	-	0	1	N	N	N	N
XP_005627635	PGM3	phosphoacetylglucosamine mutase isoform X3 [Canis lupus familiaris]	7	1	1	59.9	6.14	-	-	0	-	-	0	ID only	ID only	1	-	-	0	-	-	0	-	-	0	1	N	N	N	N
XP_540837	PACS1	phosphofurin acidic cluster sorting protein 1 [Canis lupus familiaris]	3	1	1	104.7	7.91	-	-	0	-	-	0	-	-	0	ID only	ID only	1	ID only	ID only	1	-	-	0	2	N	Y	N	N
XP_865342	PGM1	phosphoglucomutase-1 isoform X2 [Canis lupus familiaris]	36	16	16	61.4	6.95	412000	378000	1.1	-	-	0	9990000	5100000	2	-	-	0	13000000	8760000	1.5	-	-	0	3	N	Y	N	N
XP_536263	PGM2	phosphoglucomutase-2 [Canis lupus familiaris]	26	11	11	68.4	7.05	94400	51700	1.8	-	-	0	4160000	1590000	2.6	-	-	0	3340000	2090000	1.6	-	-	0	3	N	Y	N	N
XP_849992	PGK1	phosphoglycerate kinase 1 [Canis lupus familiaris]	23	25	25	44.4	7.87	126000000	25200000	5	156000	87700	1.8	224000000	108000000	2.1	526000	292000	1.8	293000000	198000000	1.5	1370000	1050000	1.3	3	Y	Y	Y	N
XP_532167	PGK2	phosphoglycerate kinase 2 [Canis lupus familiaris]	12	3	1	44.7	7.65	-	-	0	-	-	0	-	-	0	-	-	0	-	-	0	ID only	ID only	1	1	N	N	N	N
XP_860038	PGAM1	phosphoglycerate mutase 1 [Canis lupus familiaris]	19	23	23	28.8	7.18	18800000	7560000	2.5	-	-	0	132000000	76400000	1.7	2160000	860000	2.5	156000000	83400000	1.9	1730000	1460000	1.2	3	N	Y	Y	N
XP_532805	DDHD2	phospholipase DDHD2 isoform X1 [Canis lupus familiaris]	1	1	1	81.4	5.43	-	-	0	-	-	0	-	-	0	-	-	0	510000	317000	1.6	-	-	0	1	N	N	N	N
XP_005620375	PLSCR3	phospholipid scramblase 3 [Canis lupus familiaris]	3	1	1	64	9.36	-	-	0	-	-	0	-	-	0	-	-	0	-	-	0	ID only	ID only	1	1	N	Y	N	N
XP_543027	PLTP	phospholipid transfer protein [Canis lupus familiaris]	26	8	8	54.7	7.21	311000	18100	17.2	273000	14900	18.4	447000	37300	12	-	-	0	7380000	544000	13.6	5980000	336000	17.8	3	Y	Y	N	N
XP_013974259	ATP8A1	phospholipid-transporting ATPase IA isoform X1 [Canis lupus familiaris]	2	2	2	134.6	7.27	-	-	0	-	-	0	-	-	0	-	-	0	-	-	0	206000	80200	2.6	1	N	Y	N	N
XP_022275788	PMM2	phosphomannomutase 2 [Canis lupus familiaris]	17	3	3	28.4	5.99	-	-	0	-	-	0	1230000	521000	2.4	-	-	0	1970000	1060000	1.9	-	-	0	2	N	Y	N	N
XP_022277042	PMVK	phosphomevalonate kinase isoform X2 [Canis lupus familiaris]	4	1	1	32.5	8.53	-	-	0	-	-	0	91500	39100	2.3	-	-	0	-	-	0	-	-	0	1	N	Y	N	N
XP_013970854	PMVK	phosphomevalonate kinase isoform X4 [Canis lupus familiaris]	8	2	2	31.5	9.01	-	-	0	-	-	0	-	-	0	-	-	0	201000	36800	5.5	-	-	0	1	N	Y	N	N
XP_532539	PPCS	phosphopantothenate--cysteine ligase isoform X1 [Canis lupus familiaris]	9	2	2	33.8	8.13	-	-	0	-	-	0	-	-	0	-	-	0	381000	195000	2	-	-	0	1	N	Y	N	N
XP_849109	PRPSAP1	phosphoribosyl pyrophosphate synthase-associated protein 1 [Canis lupus familiaris]	4	1	1	42.5	8.54	-	-	0	-	-	0	-	-	0	85800	36800	2.3	-	-	0	-	-	0	1	N	Y	N	N
XP_013965128	PHKB	phosphorylase b kinase regulatory subunit beta isoform X2 [Canis lupus familiaris]	2	2	2	123.9	7.01	-	-	0	-	-	0	-	-	0	-	-	0	-	-	0	ID only	ID only	1	1	N	Y	N	N
XP_022276585	PSAT1	phosphoserine aminotransferase isoform X1 [Canis lupus familiaris]	9	3	3	42.2	8.13	-	-	0	-	-	0	1290000	740000	1.7	-	-	0	-	-	0	-	-	0	1	N	N	N	N
XP_533520	PSAT1	phosphoserine aminotransferase isoform X2 [Canis lupus familiaris]	7	2	2	40.4	8.35	-	-	0	-	-	0	-	-	0	-	-	0	1160000	778000	1.5	-	-	0	1	N	N	N	N
XP_848288	PSPH	phosphoserine phosphatase [Canis lupus familiaris]	6	1	1	25	5.35	121000	76300	1.6	-	-	0	-	-	0	-	-	0	-	-	0	-	-	0	1	N	N	N	N
XP_005624419	SERPINF1	pigment epithelium-derived factor isoform X1 [Canis lupus familiaris]	46	14	14	46.5	7.18	15300000	339000	45.1	-	-	0	20400000	1410000	14.4	-	-	0	24700000	2910000	8.5	-	-	0	3	Y	Y	Y	N
XP_537963	PIR	pirin isoform X1 [Canis lupus familiaris]	17	3	3	32.1	6.92	1390000	359000	3.9	42600	8910	4.8	-	-	0	-	-	0	825000	408000	2	-	-	0	2	Y	N	N	N
XP_005642370	LOC100855485	pituitary tumor-transforming gene 1 protein-interacting protein-like, partial [Canis lupus familiaris]	4	1	1	30.7	9.2	-	-	0	ID only	ID only	1	-	-	0	951000	376000	2.5	-	-	0	753000	364000	2.1	3	Y	Y	N	N
XP_013977913	PIWIL4	piwi-like protein 4 isoform X1 [Canis lupus familiaris]	1	1	1	96.2	8.82	ID only	ID only	1	-	-	0	-	-	0	-	-	0	-	-	0	-	-	0	1	N	N	N	N
NP_001274090	PKP1; LOC100855871	plakophilin-1 [Canis lupus familiaris]	2	1	1	80.5	8.97	-	-	0	235000	ID only	10	ID only	57000	0.5	79400	60600	1.3	50600	ID only	10	24200	39100	0.6	3	N	N	N	N
XP_005615744	FUCA2	plasma alpha-L-fucosidase [Canis lupus familiaris]	2	1	1	57	9.01	ID only	ID only	1	-	-	0	-	-	0	-	-	0	-	-	0	-	-	0	1	N	N	N	N
NP_001229646	KLKB1	plasma kallikrein [Canis lupus familiaris]	4	2	2	70.8	7.96	28800	4070	7.1	-	-	0	366000	92200	4	ID only	ID only	1	485000	96500	5	-	-	0	3	Y	N	N	N
XP_537545	SERPINA5; LOC480424	plasma serine protease inhibitor [Canis lupus familiaris]	17	6	6	45.8	8.44	ID only	ID only	1	-	-	0	2280000	242000	9.4	-	-	0	2390000	167000	14.2	-	-	0	3	Y	Y	N	N
NP_001184024	SERPINE1	plasminogen activator inhibitor 1 precursor [Canis lupus familiaris]	56	27	27	45.3	8.02	243000000	8120000	29.9	18800000	1350000	14	189000000	18200000	10.4	58800000	6070000	9.7	337000000	48400000	7	64500000	6260000	10.3	3	Y	Y	Y	N
NP_001273889	PLG	plasminogen precursor [Canis lupus familiaris]	44	35	35	91.1	7.08	5570000	838000	6.6	6010000	185000	32.5	53200000	6490000	8.2	22200000	2020000	11	47800000	8850000	5.4	19000000	2600000	7.3	3	Y	Y	N	Y
XP_542817	PLS1	plastin-1 [Canis lupus familiaris]	2	10	8	70.3	5.25	17700	15900	1.1	-	-	0	120000	93900	1.3	-	-	0	8090000	5240000	1.5	150000	96000	1.6	3	N	Y	N	N
XP_022264003	LCP1	plastin-2 isoform X1 [Canis lupus familiaris]	19	8	6	75.9	5.82	40200	38600	1	-	-	0	1860000	845000	2.2	-	-	0	4900000	2780000	1.8	-	-	0	3	N	Y	N	N
NP_001165243	PPBP	platelet basic protein precursor [Canis lupus familiaris]	52	11	11	12.9	8.95	693000000	63700000	10.9	241000000	22400000	10.8	755000000	130000000	5.8	587000000	79600000	7.4	1160000000	303000000	3.8	1390000000	112000000	12.4	3	Y	Y	Y	Y
XP_005622742	PEAR1	platelet endothelial aggregation receptor 1 isoform X1 [Canis lupus familiaris]	3	2	2	110.2	7.14	-	-	0	ID only	ID only	1	ID only	ID only	1	ID only	ID only	1	396000	ID only	10	ID only	ID only	1	3	N	Y	N	N
XP_022278549	PECAM1	platelet endothelial cell adhesion molecule isoform X1 [Canis lupus familiaris]	14	8	8	82.7	6.06	-	-	0	969000	346000	2.8	-	-	0	3010000	1930000	1.6	-	-	0	5640000	3470000	1.6	3	N	Y	N	N
NP_001003083	GP1BA	platelet glycoprotein Ib alpha chain precursor [Canis lupus familiaris]	22	15	15	74.1	5.91	57500000	44500000	1.3	4360000	2250000	1.9	249000000	110000000	2.3	16200000	6880000	2.4	312000000	163000000	1.9	21800000	9690000	2.3	3	Y	Y	Y	Y
XP_005636645	GP1BB	platelet glycoprotein Ib beta chain [Canis lupus familiaris]	27	6	6	21.7	10.02	-	-	0	18100000	14100000	1.3	-	-	0	61700000	27300000	2.3	358000	335000	1.1	112000000	42100000	2.7	3	Y	Y	Y	N
XP_852017	GP9	platelet glycoprotein IX [Canis lupus familiaris]	14	3	3	19.2	5.64	-	-	0	507000	305000	1.7	-	-	0	4930000	1610000	3.1	-	-	0	7480000	2570000	2.9	3	Y	Y	N	N
XP_022283209	GP6	platelet glycoprotein VI isoform X1 [Canis lupus familiaris]	21	7	7	39.9	8.79	5130000	486000	10.6	ID only	ID only	1	1860000	523000	3.6	-	-	0	15600000	4820000	3.2	-	-	0	3	Y	Y	Y	N
XP_005625009	PAFAH1B1	platelet-activating factor acetylhydrolase IB subunit alpha [Canis lupus familiaris]	11	17	16	46.6	7.37	21200000	4350000	4.9	564000	178000	3.2	15500000	6180000	2.5	839000	364000	2.3	33600000	19000000	1.8	995000	493000	2	3	Y	Y	N	N
XP_005616589	PAFAH1B3	platelet-activating factor acetylhydrolase IB subunit gamma isoform X1 [Canis lupus familiaris]	4	1	1	25.8	7.11	-	-	0	-	-	0	970000	449000	2.2	-	-	0	-	-	0	-	-	0	1	N	Y	N	N
XP_022279695	PDGFB	platelet-derived growth factor subunit B isoform X1 [Canis lupus familiaris]	15	5	5	30.6	9.66	-	-	0	-	-	0	-	-	0	2270000	99300	22.8	148000	ID only	10	5210000	275000	18.9	2	Y	Y	Y	N
NP_001003363	PLEK	pleckstrin [Canis lupus familiaris]	55	23	23	40.2	8.28	273000000	58400000	4.7	21400000	3660000	5.8	321000000	125000000	2.6	66200000	27100000	2.4	620000000	354000000	1.8	85300000	34100000	2.5	3	Y	Y	Y	N
XP_022266838	PLEKHA5	pleckstrin homology domain-containing family A member 5 isoform X1 [Canis lupus familiaris]	1	1	1	149.9	7.55	-	-	0	-	-	0	-	-	0	46300	90200	0.5	-	-	0	-	-	0	1	N	N	N	N
XP_544722	PLEKHO2	pleckstrin homology domain-containing family O member 2 isoform X1 [Canis lupus familiaris]	8	2	2	54.3	5.91	-	-	0	-	-	0	106000	94200	1.1	-	-	0	184000	210000	0.9	ID only	ID only	1	2	N	Y	N	N
XP_022262525	PLXDC2	plexin domain-containing protein 2 isoform X1 [Canis lupus familiaris]	2	1	1	62.4	7.74	-	-	0	-	-	0	821000	132000	6.2	-	-	0	1140000	209000	5.4	-	-	0	2	Y	Y	Y	N
XP_013967159	PLXNB3	plexin-B3 [Canis lupus familiaris]	3	4	4	211.4	6.89	-	-	0	-	-	0	179000	51500	3.5	191000	76300	2.5	1110000	316000	3.5	541000	244000	2.2	2	Y	Y	N	N
XP_022283553	ADPRHL2	poly(ADP-ribose) glycohydrolase ARH3 isoform X1 [Canis lupus familiaris]	6	2	2	42	5.36	-	-	0	-	-	0	ID only	ID only	1	-	-	0	339000	239000	1.4	-	-	0	2	N	Y	N	N
XP_538537	PCBP1	poly(rC)-binding protein 1 [Canis lupus familiaris]	27	7	6	37.4	7.09	1230000	306000	4	-	-	0	4650000	956000	4.9	1340000	750000	1.8	7310000	2370000	3.1	1780000	1270000	1.4	3	Y	Y	N	N
XP_013963909	PCBP2	poly(rC)-binding protein 2 isoform X1 [Canis lupus familiaris]	16	4	2	38.6	6.79	-	-	0	-	-	0	-	-	0	-	-	0	1410000	455000	3.1	-	-	0	1	N	Y	N	N
XP_005639067	PCBP3	poly(rC)-binding protein 3 isoform X1 [Canis lupus familiaris]	5	3	1	41.6	8.09	3750000	767000	4.9	592000	220000	2.7	-	-	0	-	-	0	-	-	0	-	-	0	1	N	Y	N	N
XP_856708	PABPC1	polyadenylate-binding protein 1 isoform X1 [Canis lupus familiaris]	5	2	2	70.6	9.5	-	-	0	-	-	0	-	-	0	-	-	0	ID only	ID only	1	-	-	0	1	N	Y	N	N
XP_005628958	PABPC4	polyadenylate-binding protein 4 isoform X1 [Canis lupus familiaris]	3	1	1	72.2	9.35	-	-	0	-	-	0	ID only	ID only	1	-	-	0	-	-	0	-	-	0	1	N	N	N	N
XP_022273559	PAIP1	polyadenylate-binding protein-interacting protein 1 isoform X1 [Canis lupus familiaris]	3	1	1	50	4.51	126000	5560	22.7	-	-	0	-	-	0	-	-	0	176000	59400	3	-	-	0	2	Y	Y	N	N
NP_001274081	PIGR	polymeric immunoglobulin receptor precursor [Canis lupus familiaris]	2	2	2	83.1	5.52	-	-	0	-	-	0	-	-	0	193000	54000	3.6	-	-	0	ID only	ID only	1	2	N	N	N	N
XP_005618892	GALNT2	polypeptide N-acetylgalactosaminyltransferase 2 [Canis lupus familiaris]	9	3	3	62.9	7.75	ID only	ID only	1	-	-	0	1210000	ID only	10	-	-	0	1600000	182000	8.8	-	-	0	3	Y	Y	N	N
XP_542215	PTBP1	polypyrimidine tract-binding protein 1 isoform X1 [Canis lupus familiaris]	4	1	1	59.5	9.16	-	-	0	-	-	0	-	-	0	-	-	0	ID only	ID only	1	-	-	0	1	N	Y	N	N
XP_005620328	PFDN1; LOC102152612	prefoldin subunit 1 [Canis lupus familiaris]	9	1	1	14.2	6.81	-	-	0	-	-	0	282000	104000	2.7	-	-	0	-	-	0	-	-	0	1	N	Y	N	N
XP_545765	PFDN2	prefoldin subunit 2 [Canis lupus familiaris]	9	2	2	16.6	6.6	ID only	ID only	1	-	-	0	839000	422000	2	107000	ID only	10	1670000	449000	3.7	ID only	ID only	1	3	Y	Y	N	N
XP_538210	VBP1	prefoldin subunit 3 isoform X1 [Canis lupus familiaris]	6	2	2	22.5	6.28	-	-	0	-	-	0	156000	96600	1.6	-	-	0	126000	ID only	10	-	-	0	2	N	Y	N	N
XP_005635246	LOC100855575; PFDN4	prefoldin subunit 4 isoform X1 [Canis lupus familiaris]	7	1	1	20.2	4.56	-	-	0	-	-	0	170000	76500	2.2	-	-	0	-	-	0	-	-	0	1	N	Y	N	N
NP_001238878	PFDN5	prefoldin subunit 5 [Canis lupus familiaris]	10	2	2	17.4	6.54	308000	71300	4.3	-	-	0	411000	250000	1.6	87400	19500	4.5	706000	288000	2.5	96500	34800	2.8	3	Y	Y	N	N
XP_005637230	LOC611458	pregnancy zone protein-like isoform X1 [Canis lupus familiaris]	3	8	8	166.5	6.58	14300	15300	0.9	49600	19900	2.5	-	-	0	-	-	0	3730000	3640000	1	442000	ID only	10	2	Y	Y	N	N
XP_538538	PCYOX1; LOC481418	prenylcysteine oxidase 1 [Canis lupus familiaris]	6	2	2	56.7	6.54	-	-	0	27300	23200	1.2	-	-	0	-	-	0	-	-	0	ID only	ID only	1	2	N	Y	N	N
XP_535200	PITRM1	presequence protease, mitochondrial [Canis lupus familiaris]	2	1	1	116.5	7.05	-	-	0	-	-	0	-	-	0	ID only	ID only	1	-	-	0	-	-	0	1	N	Y	N	N
XP_013965359	EGF	pro-epidermal growth factor isoform X1 [Canis lupus familiaris]	2	2	2	133.7	6.01	-	-	0	-	-	0	-	-	0	-	-	0	1660000	176000	9.4	-	-	0	1	N	Y	N	N
NP_001003094	EGF	pro-epidermal growth factor precursor [Canis lupus familiaris]	1	1	1	134.3	5.94	51600	18300	2.8	66400	3450	19.2	-	-	0	ID only	ID only	1	-	-	0	196000	110000	1.8	3	N	Y	N	N
XP_543071	NPEPL1	probable aminopeptidase NPEPL1 [Canis lupus familiaris]	5	3	3	55.9	7.52	-	-	0	-	-	0	229000	108000	2.1	17400	25900	0.7	597000	388000	1.5	126000	66300	1.9	2	N	N	N	N
XP_022273932	DDX6	probable ATP-dependent RNA helicase DDX6 [Canis lupus familiaris]	5	1	1	54.4	8.66	-	-	0	-	-	0	-	-	0	-	-	0	-	-	0	12300	9390	1.3	1	N	Y	N	N
XP_532950	CIAO1	probable cytosolic iron-sulfur protein assembly protein CIAO1 [Canis lupus familiaris]	22	5	5	37.8	4.86	-	-	0	-	-	0	ID only	ID only	1	-	-	0	1140000	559000	2	-	-	0	2	N	Y	N	N
XP_022273184	HERC4	probable E3 ubiquitin-protein ligase HERC4 isoform X1 [Canis lupus familiaris]	2	1	1	123.3	6.4	-	-	0	-	-	0	-	-	0	-	-	0	414000	217000	1.9	-	-	0	1	N	Y	N	N
XP_005641704	MID2	probable E3 ubiquitin-protein ligase MID2 isoform X1 [Canis lupus familiaris]	2	1	1	83.2	7.46	-	-	0	-	-	0	ID only	ID only	1	-	-	0	-	-	0	-	-	0	1	N	N	N	N
XP_853023	PNKD	probable hydrolase PNKD [Canis lupus familiaris]	6	1	1	43.5	8.91	-	-	0	-	-	0	-	-	0	-	-	0	-	-	0	ID only	ID only	1	1	N	Y	N	N
XP_013962885	ZDHHC20	probable palmitoyltransferase ZDHHC20 isoform X1 [Canis lupus familiaris]	5	1	1	42.3	7.87	-	-	0	-	-	0	-	-	0	31400	ID only	10	-	-	0	-	-	0	1	N	Y	N	N
XP_003432020	OSGEP	probable tRNA N6-adenosine threonylcarbamoyltransferase [Canis lupus familiaris]	5	1	1	36.4	5.88	-	-	0	-	-	0	ID only	ID only	1	-	-	0	ID only	ID only	1	-	-	0	2	N	Y	N	N
XP_005642140	USP9X	probable ubiquitin carboxyl-terminal hydrolase FAF-X [Canis lupus familiaris]	3	5	5	220.8	5.76	-	-	0	-	-	0	28700	48000	0.6	302000	115000	2.6	-	-	0	426000	306000	1.4	2	N	Y	N	N
XP_859401	PCOLCE	procollagen C-endopeptidase enhancer 1 [Canis lupus familiaris]	4	1	1	48.6	7.09	49300	ID only	10	-	-	0	-	-	0	-	-	0	-	-	0	-	-	0	1	N	N	N	N
NP_001271371	PLOD1	procollagen-lysine,2-oxoglutarate 5-dioxygenase 1 precursor [Canis lupus familiaris]	2	2	2	83.5	6.74	ID only	ID only	1	-	-	0	-	-	0	-	-	0	473000	ID only	10	-	-	0	2	N	Y	N	N
XP_536856	PLOD3	procollagen-lysine,2-oxoglutarate 5-dioxygenase 3 [Canis lupus familiaris]	9	5	5	84.7	6.23	-	-	0	-	-	0	720000	104000	6.9	549000	118000	4.6	2900000	429000	6.8	962000	207000	4.6	2	Y	Y	N	N
XP_005619977	LOC607397; PFN1	profilin-1 [Canis lupus familiaris]	43	10	2	12.7	9.54	471000000	91900000	5.1	747000	469000	1.6	612000000	279000000	2.2	2630000	1410000	1.9	899000000	540000000	1.7	3870000	2170000	1.8	3	Y	Y	Y	Y
NP_001003074	PGR	progesterone receptor [Canis lupus familiaris]	2	1	1	98.4	8.37	-	-	0	193000	10700	17.9	-	-	0	-	-	0	-	-	0	-	-	0	1	N	N	N	N
XP_005634263	PDCD6IP	programmed cell death 6-interacting protein isoform X1 [Canis lupus familiaris]	5	9	9	96.8	6.35	329000	136000	2.4	ID only	11300	0.5	2410000	443000	5.4	ID only	ID only	1	3380000	1120000	3	118000	140000	0.8	3	Y	Y	N	N
XP_545269	PDCD10	programmed cell death protein 10 [Canis lupus familiaris]	29	6	6	24.7	8.19	931000	153000	6.1	ID only	ID only	1	1860000	622000	3	338000	94400	3.6	4660000	1720000	2.7	1760000	967000	1.8	3	Y	Y	N	N
XP_005616835	PDCD5	programmed cell death protein 5 [Canis lupus familiaris]	10	1	1	12.5	6.14	ID only	ID only	1	-	-	0	-	-	0	-	-	0	162000	85500	1.9	-	-	0	2	N	Y	N	N
XP_851917	PDCD6	programmed cell death protein 6 isoform X1 [Canis lupus familiaris]	5	1	1	21.7	5.4	-	-	0	-	-	0	-	-	0	ID only	ID only	1	-	-	0	-	-	0	1	N	Y	N	N
NP_001103649	PHB	prohibitin [Canis lupus familiaris]	25	5	5	29.8	5.76	-	-	0	ID only	ID only	1	-	-	0	146000	86300	1.7	-	-	0	1390000	993000	1.4	3	N	Y	N	N
XP_543843	PHB2	prohibitin-2 [Canis lupus familiaris]	26	6	6	33.4	9.85	-	-	0	ID only	ID only	1	-	-	0	215000	80100	2.7	-	-	0	1530000	859000	1.8	3	N	Y	N	N
XP_851087	PIP	prolactin-inducible protein [Canis lupus familiaris]	8	1	1	16.7	8.25	-	-	0	-	-	0	-	-	0	-	-	0	ID only	ID only	1	-	-	0	1	N	N	N	N
XP_531629	PA2G4	proliferation-associated protein 2G4 isoform X2 [Canis lupus familiaris]	12	16	16	43.8	6.55	19600000	2310000	8.5	-	-	0	17600000	7560000	2.3	313000	115000	2.7	31800000	18700000	1.7	309000	149000	2.1	3	Y	Y	N	N
XP_022268438	PSTPIP1	proline-serine-threonine phosphatase-interacting protein 1 [Canis lupus familiaris]	3	5	5	65.8	8.19	ID only	ID only	1	-	-	0	715000	139000	5.2	193000	87500	2.2	2800000	1200000	2.3	328000	78300	4.2	3	Y	N	N	N
XP_022282119	PREP	prolyl endopeptidase [Canis lupus familiaris]	37	17	17	72.9	6.05	452000	395000	1.1	-	-	0	16300000	10700000	1.5	-	-	0	21500000	16700000	1.3	-	-	0	3	N	Y	N	N
XP_005634520	PCCB	propionyl-CoA carboxylase beta chain, mitochondrial [Canis lupus familiaris]	3	1	1	58.2	7.83	-	-	0	ID only	15100	0.5	-	-	0	ID only	ID only	1	ID only	72300	0.5	ID only	ID only	1	3	N	Y	N	N
XP_005619046	PSAP	prosaposin isoform X1 [Canis lupus familiaris]	3	1	1	58.6	5	ID only	ID only	1	-	-	0	1450000	50500	28.7	ID only	ID only	1	ID only	ID only	1	ID only	ID only	1	3	N	Y	N	N
XP_005625578	PTGES3	prostaglandin E synthase 3 [Canis lupus familiaris]	12	3	2	20.9	4.63	ID only	ID only	1	-	-	0	510000	155000	3.3	-	-	0	2230000	594000	3.7	-	-	0	3	Y	Y	N	N
XP_005625065	PTGS1	prostaglandin G/H synthase 1 isoform X1 [Canis lupus familiaris]	8	3	1	74	7.65	-	-	0	927000	261000	3.6	-	-	0	-	-	0	-	-	0	-	-	0	1	N	Y	N	N
XP_005625067	PTGS1	prostaglandin G/H synthase 1 isoform X4 [Canis lupus familiaris]	17	7	1	73	7.55	-	-	0	-	-	0	-	-	0	77600	120000	0.6	-	-	0	2850000	1360000	2.1	2	N	Y	N	N
NP_001003023	PTGS1	prostaglandin G/H synthase 1 precursor [Canis lupus familiaris]	17	7	1	72.5	7.68	-	-	0	395000	89800	4.4	-	-	0	ID only	ID only	1	-	-	0	ID only	ID only	1	3	N	Y	N	N
XP_005626979	PTGR1	prostaglandin reductase 1 [Canis lupus familiaris]	45	10	10	35.7	8.32	3420000	1190000	2.9	ID only	ID only	1	8370000	5590000	1.5	339000	152000	2.2	12000000	8160000	1.5	-	-	0	3	N	Y	N	N
XP_537380	PSME1	proteasome activator complex subunit 1 [Canis lupus familiaris]	6	4	4	28.7	6.02	340000	70400	4.8	ID only	ID only	1	630000	214000	2.9	308000	130000	2.4	1520000	564000	2.7	81700	37200	2.2	3	Y	Y	N	N
XP_537382	PSME2	proteasome activator complex subunit 2 [Canis lupus familiaris]	6	5	5	27.3	5.73	446000	176000	2.5	-	-	0	2630000	897000	2.9	275000	75000	3.7	2510000	587000	4.3	116000	79800	1.5	3	Y	Y	N	N
XP_536897	PSMG3	proteasome assembly chaperone 3 [Canis lupus familiaris]	11	1	1	13.1	8.32	ID only	ID only	1	-	-	0	-	-	0	-	-	0	-	-	0	-	-	0	1	N	N	N	N
XP_005633752	PSMA1	proteasome subunit alpha type-1 [Canis lupus familiaris]	27	8	8	29.5	6.8	351000	478000	0.7	1810000	189000	9.6	5980000	4830000	1.2	5760000	2920000	2	7700000	8520000	0.9	5680000	2130000	2.7	3	Y	Y	N	N
XP_533078	PSMA2	proteasome subunit alpha type-2 [Canis lupus familiaris]	41	7	7	25.9	7.43	819000	619000	1.3	675000	379000	1.8	1730000	1320000	1.3	2620000	605000	4.3	4800000	6490000	0.7	3490000	983000	3.5	3	Y	Y	N	N
XP_537460	PSMA3	proteasome subunit alpha type-3 [Canis lupus familiaris]	17	5	5	28.4	5.44	13300	3210	4.1	ID only	ID only	1	4480000	3650000	1.2	1330000	843000	1.6	5980000	6020000	1	2690000	1190000	2.3	3	N	Y	N	N
XP_013966868	LOC100687556; PSMA4	proteasome subunit alpha type-4 [Canis lupus familiaris]	3	1	1	31.2	6.39	-	-	0	-	-	0	-	-	0	-	-	0	874000	867000	1	676000	224000	3	1	N	Y	N	N
XP_003639184	LOC100856348; PSMA5	proteasome subunit alpha type-5 [Canis lupus familiaris]	44	7	7	26.4	4.79	3620000	2110000	1.7	769000	114000	6.7	7430000	5510000	1.3	2960000	1400000	2.1	11400000	9790000	1.2	6190000	2380000	2.6	3	Y	Y	N	N
XP_537412	PSMA6	proteasome subunit alpha type-6 isoform X1 [Canis lupus familiaris]	39	9	9	27.4	6.76	1240000	523000	2.4	916000	181000	5.1	10400000	8480000	1.2	9770000	3850000	2.5	16000000	15200000	1.1	9030000	3740000	2.4	3	Y	Y	N	N
XP_013962772	PSMA7	proteasome subunit alpha type-7 [Canis lupus familiaris]	41	6	4	20.2	8.51	1890000	614000	3.1	513000	89100	5.8	7250000	5920000	1.2	5110000	1970000	2.6	11400000	9440000	1.2	7290000	2820000	2.6	3	Y	Y	N	N
XP_003639222	LOC100856395; PSMA8	proteasome subunit alpha type-7-like isoform X1 [Canis lupus familiaris]	24	5	2	27.9	8.87	-	-	0	-	-	0	1880000	1340000	1.4	548000	340000	1.6	2080000	1670000	1.3	612000	291000	2.1	2	N	N	N	N
XP_532275	PSMB1	proteasome subunit beta type-1 [Canis lupus familiaris]	27	8	8	26.4	7.8	769000	534000	1.4	950000	563000	1.7	2320000	2140000	1.1	2700000	1280000	2.1	4080000	3200000	1.3	2190000	860000	2.5	3	Y	Y	N	N
XP_532564	PSMB2	proteasome subunit beta type-2 isoform X2 [Canis lupus familiaris]	17	4	4	22.8	6.68	-	-	0	-	-	0	3330000	2940000	1.1	2150000	1390000	1.5	5590000	3130000	1.8	2350000	919000	2.6	2	N	Y	N	N
NP_001239086	PSMB3	proteasome subunit beta type-3 [Canis lupus familiaris]	23	4	4	23	6.55	ID only	186000	0.5	ID only	ID only	1	3110000	2450000	1.3	1680000	753000	2.2	2780000	1410000	2	1790000	678000	2.6	3	Y	Y	N	N
XP_533057	PSMB4	proteasome subunit beta type-4 [Canis lupus familiaris]	30	6	6	29.1	5.66	573000	422000	1.4	515000	242000	2.1	1950000	1610000	1.2	2070000	1200000	1.7	2460000	3160000	0.8	2770000	997000	2.8	3	Y	Y	N	N
XP_003639276	LOC100855659; PSMB5	proteasome subunit beta type-5 [Canis lupus familiaris]	45	9	9	28.5	6.68	1020000	901000	1.1	1210000	546000	2.2	1270000	678000	1.9	1980000	1120000	1.8	3120000	2080000	1.5	3650000	1030000	3.5	3	Y	Y	N	N
XP_849241	PSMB6	proteasome subunit beta type-6 [Canis lupus familiaris]	9	2	2	25.5	4.86	-	-	0	-	-	0	782000	668000	1.2	192000	145000	1.3	1210000	815000	1.5	960000	348000	2.8	2	N	Y	N	N
NP_001271382	PSMB7	proteasome subunit beta type-7 [Canis lupus familiaris]	7	2	2	30	7.68	-	-	0	-	-	0	211000	187000	1.1	ID only	ID only	1	1130000	1160000	1	ID only	ID only	1	2	N	Y	N	N
NP_001041550	PSMB8	proteasome subunit beta type-8 precursor [Canis lupus familiaris]	9	3	3	30.5	7.72	ID only	ID only	1	124000	111000	1.1	380000	332000	1.1	335000	212000	1.6	396000	297000	1.3	581000	139000	4.2	3	N	Y	N	N
NP_001041551	PSMB9	proteasome subunit beta type-9 [Canis lupus familiaris]	13	2	2	22.3	5.19	-	-	0	-	-	0	61500	62800	0.1	46000	40400	1.1	58100	58800	1	44700	16400	2.7	2	N	Y	N	N
XP_013961983	EPB41	protein 4.1 isoform X3 [Canis lupus familiaris]	9	6	6	113	5.5	-	-	0	-	-	0	-	-	0	-	-	0	-	-	0	884000	504000	1.8	1	N	Y	N	N
XP_022261136	EPB41	protein 4.1 isoform X9 [Canis lupus familiaris]	18	11	11	97	5.69	-	-	0	-	-	0	-	-	0	4040000	2230000	1.8	-	-	0	-	-	0	1	N	Y	N	N
XP_541860	ABHD14B	protein ABHD14B [Canis lupus familiaris]	16	2	2	22.3	6	-	-	0	-	-	0	1340000	665000	2	-	-	0	4140000	1890000	2.2	-	-	0	2	Y	Y	N	N
XP_013973796	ABHD16A	protein ABHD16A isoform X1 [Canis lupus familiaris]	3	1	1	64.8	7.94	-	-	0	-	-	0	-	-	0	-	-	0	-	-	0	215000	317000	0.7	1	N	Y	N	N
XP_538807	AMBP	protein AMBP [Canis lupus familiaris]	11	6	6	38.8	6.35	194000	ID only	10	-	-	0	928000	61100	15.2	ID only	ID only	1	1010000	ID only	10	-	-	0	3	Y	Y	Y	N
XP_022277509	PRMT5	protein arginine N-methyltransferase 5 isoform X1 [Canis lupus familiaris]	4	2	2	73.6	6.21	-	-	0	-	-	0	110000	198000	0.6	-	-	0	38200	62500	0.6	-	-	0	2	N	Y	N	N
XP_005615658	C1H6orf170; TBC1D32	protein broad-minded isoform X1 [Canis lupus familiaris]	2	1	1	149.2	6.24	-	-	0	ID only	ID only	1	-	-	0	-	-	0	-	-	0	-	-	0	1	N	N	N	N
XP_022279767	CNPY2; CS	protein canopy homolog 2 [Canis lupus familiaris]	9	2	2	20.5	4.92	1660000	775000	2.1	-	-	0	1530000	1030000	1.5	117000	89400	1.3	3160000	1180000	2.7	143000	198000	0.7	3	Y	Y	N	N
XP_851722	CNPY3	protein canopy homolog 3 [Canis lupus familiaris]	7	2	2	31.1	5.5	168000	92500	1.8	-	-	0	220000	61900	3.6	ID only	ID only	1	516000	324000	1.6	ID only	ID only	1	3	N	Y	N	N
XP_013962173	CDV3	protein CDV3 homolog isoform X1 [Canis lupus familiaris]	24	2	2	17.2	5.64	-	-	0	-	-	0	634000	268000	2.4	-	-	0	1070000	806000	1.3	-	-	0	2	N	Y	N	N
XP_005627272	CUTA	protein CutA isoform X1 [Canis lupus familiaris]	21	2	2	21.4	9.13	-	-	0	-	-	0	1230000	924000	1.3	-	-	0	2050000	851000	2.4	-	-	0	2	N	Y	N	N
XP_537091	CYR61	protein CYR61 isoform X1 [Canis lupus familiaris]	12	4	4	41.7	8.21	-	-	0	-	-	0	990000	50300	19.7	1420000	ID only	10	1080000	101000	10.7	706000	ID only	10	2	Y	N	N	N
XP_005617363	DIAPH1	protein diaphanous homolog 1 isoform X1 [Canis lupus familiaris]	7	7	7	142.2	5.36	ID only	ID only	1	-	-	0	ID only	ID only	1	ID only	ID only	1	738000	276000	2.7	1010000	566000	1.8	3	N	Y	N	N
XP_540488	P4HB	protein disulfide-isomerase [Canis lupus familiaris]	5	22	22	57.4	4.96	28200000	5670000	5	129000	85700	1.5	43100000	35700000	1.2	-	-	0	55100000	46900000	1.2	ID only	ID only	1	3	N	Y	Y	N
XP_535453	PDIA3	protein disulfide-isomerase A3 [Canis lupus familiaris]	20	29	29	56.7	6.13	73900000	30100000	2.5	1800000	612000	2.9	86200000	79500000	1.1	3500000	2060000	1.7	161000000	143000000	1.1	4210000	2290000	1.8	3	N	Y	Y	Y
XP_848238	PDIA4	protein disulfide-isomerase A4 [Canis lupus familiaris]	8	27	27	72.4	5.17	10400000	9420000	1.1	58500	36300	1.6	30400000	25800000	1.2	560000	332000	1.7	47600000	38000000	1.3	1410000	719000	2	3	N	Y	Y	N
XP_535765	PDIA5	protein disulfide-isomerase A5 [Canis lupus familiaris]	5	9	9	59.5	7.8	176000	188000	0.9	-	-	0	6240000	4800000	1.3	ID only	ID only	1	7710000	6620000	1.2	191000	119000	1.6	3	N	Y	N	N
XP_532876	PDIA6	protein disulfide-isomerase A6 [Canis lupus familiaris]	25	11	11	48.3	5.1	15900000	4320000	3.7	850000	418000	2	11500000	5340000	2.2	2010000	1750000	1.1	25100000	18000000	1.4	4480000	2830000	1.6	3	Y	Y	Y	N
XP_022274721	PARK7	protein DJ-1 isoform X1 [Canis lupus familiaris]	7	1	1	25.2	8.76	-	-	0	127000	94400	1.4	-	-	0	-	-	0	-	-	0	-	-	0	1	N	Y	Y	N
XP_022274722	PARK7	protein DJ-1 isoform X2 [Canis lupus familiaris]	17	15	15	19.9	6.34	21600000	12600000	1.7	-	-	0	26900000	15500000	1.7	136000	66300	2.1	32100000	15200000	2.1	398000	516000	0.8	3	N	Y	N	N
XP_532333	EFR3A	protein EFR3 homolog A isoform X1 [Canis lupus familiaris]	2	1	1	92.8	6.76	-	-	0	-	-	0	-	-	0	-	-	0	-	-	0	180000	32000	5.6	1	N	Y	N	N
XP_003435167	FAM177A1	protein FAM177A1 isoform X3 [Canis lupus familiaris]	5	2	2	23.9	4.53	-	-	0	-	-	0	-	-	0	145000	ID only	10	-	-	0	ID only	ID only	1	2	N	Y	N	N
XP_005615651	FAM184A	protein FAM184A isoform X1 [Canis lupus familiaris]	1	1	1	134	6.07	196000	18300	10.7	-	-	0	-	-	0	-	-	0	-	-	0	-	-	0	1	N	N	N	N
XP_855165	FAM3C	protein FAM3C [Canis lupus familiaris]	26	6	6	24.7	8.29	-	-	0	-	-	0	734000	135000	5.4	-	-	0	1760000	158000	11.1	-	-	0	2	Y	Y	Y	N
XP_022282416	FAM49B	protein FAM49B isoform X2 [Canis lupus familiaris]	6	6	6	36.7	5.88	712000	607000	1.2	ID only	ID only	1	1290000	743000	1.7	ID only	ID only	1	2330000	1410000	1.7	56400	19800	2.9	3	N	Y	N	N
XP_003432371	FAM89B	protein FAM89B [Canis lupus familiaris]	9	1	1	20.4	5.19	-	-	0	-	-	0	-	-	0	-	-	0	-	-	0	ID only	ID only	1	1	N	Y	N	N
XP_532786	FNTA	protein farnesyltransferase/geranylgeranyltransferase type-1 subunit alpha isoform X1 [Canis lupus familiaris]	7	1	1	44.5	4.97	ID only	ID only	1	-	-	0	-	-	0	-	-	0	ID only	ID only	1	-	-	0	2	N	Y	N	N
XP_005620210	FLII	protein flightless-1 homolog [Canis lupus familiaris]	6	8	8	141.6	5.97	50200	43200	1.2	96900	67200	1.4	692000	316000	2.2	1490000	750000	2	4080000	2310000	1.8	1830000	1080000	1.7	3	N	Y	N	N
XP_533984	C21H11orf73; HIKESHI	protein Hikeshi isoform X1 [Canis lupus familiaris]	8	1	1	21.6	5.45	-	-	0	-	-	0	-	-	0	-	-	0	271000	91300	3	-	-	0	1	N	Y	N	N
XP_005629843	HOOK3	protein Hook homolog 3 isoform X1 [Canis lupus familiaris]	4	2	2	83.4	5.14	-	-	0	-	-	0	-	-	0	-	-	0	161000	79200	2	-	-	0	1	N	Y	N	N
XP_022278565	PRKCA	protein kinase C alpha type [Canis lupus familiaris]	18	8	5	62.2	6.21	-	-	0	24800	3810	6.5	-	-	0	536000	ID only	10	228000	57200	4	2150000	1080000	2	3	Y	Y	N	N
XP_005625840	PACSIN2	protein kinase C and casein kinase substrate in neurons protein 2 isoform X1 [Canis lupus familiaris]	6	5	5	62.2	5.5	ID only	ID only	1	-	-	0	1310000	896000	1.5	ID only	ID only	1	3080000	2620000	1.2	ID only	ID only	1	3	N	Y	N	N
XP_022275652	PRKCB	protein kinase C beta type isoform X1 [Canis lupus familiaris]	11	6	3	62.4	6.04	1060000	20100	52.5	-	-	0	380000	129000	3	1310000	427000	3.1	1930000	764000	2.5	398000	249000	1.6	3	Y	Y	N	N
NP_001008716	PRKCD	protein kinase C delta type [Canis lupus familiaris]	6	3	3	77.3	7.84	-	-	0	34200	19600	1.7	-	-	0	387000	204000	1.9	-	-	0	1080000	605000	1.8	3	N	Y	N	N
XP_022270701	TMBIM1	protein lifeguard 3 [Canis lupus familiaris]	5	1	1	30	7.88	-	-	0	-	-	0	-	-	0	-	-	0	-	-	0	232000	98300	2.4	1	N	Y	N	N
XP_013966271	KIAA1715; LNPK	protein lunapark isoform X1 [Canis lupus familiaris]	3	1	1	48	5.27	-	-	0	-	-	0	-	-	0	-	-	0	-	-	0	ID only	ID only	1	1	N	Y	N	N
XP_005638199	MTDH	protein LYRIC isoform X1 [Canis lupus familiaris]	5	2	2	67.1	9.32	-	-	0	ID only	ID only	1	-	-	0	-	-	0	-	-	0	364000	103000	3.5	2	N	Y	N	N
XP_013975902	MEMO1	protein MEMO1 [Canis lupus familiaris]	6	3	3	23.2	8.24	2740000	1230000	2.2	ID only	ID only	1	3180000	2880000	1.1	130000	31800	4.1	4060000	2730000	1.5	124000	39600	3.1	3	Y	Y	N	N
XP_003639832	LOC100855453; MRVI1	protein MRVI1 isoform X1 [Canis lupus familiaris]	4	2	2	98.9	5.91	-	-	0	-	-	0	-	-	0	ID only	ID only	1	-	-	0	ID only	ID only	1	2	N	Y	N	N
XP_022275756	NTAN1	protein N-terminal asparagine amidohydrolase isoform X1 [Canis lupus familiaris]	11	2	2	36.3	5.99	-	-	0	-	-	0	-	-	0	-	-	0	ID only	ID only	1	-	-	0	1	N	N	N	N
XP_022269820	NKD2	protein naked cuticle homolog 2 [Canis lupus familiaris]	5	1	1	65.1	8.28	-	-	0	-	-	0	-	-	0	-	-	0	ID only	ID only	1	-	-	0	1	N	N	N	N
XP_005635070	NDRG3	protein NDRG3 isoform X1 [Canis lupus familiaris]	8	1	1	42.7	5.33	38500	ID only	10	ID only	5050	0.5	-	-	0	-	-	0	-	-	0	-	-	0	1	N	Y	N	N
XP_536828	GBAS; NIPSNAP2	protein NipSnap homolog 2 isoform X1 [Canis lupus familiaris]	12	3	3	33.5	9.19	-	-	0	-	-	0	-	-	0	176000	107000	1.7	-	-	0	420000	211000	2	2	N	Y	N	N
XP_538772	NIPSNAP3B; NIPSNAP3A; LOC481650	protein NipSnap homolog 3A [Canis lupus familiaris]	13	3	3	28.2	8.97	-	-	0	-	-	0	ID only	ID only	1	-	-	0	1520000	904000	1.7	-	-	0	2	N	Y	N	N
XP_532021	NIPSNAP3A; LOC474791	protein NipSnap homolog 3A isoform X1 [Canis lupus familiaris]	9	1	1	28.5	9.26	-	-	0	-	-	0	409000	295000	1.4	-	-	0	-	-	0	-	-	0	1	N	Y	N	N
XP_545115	POGLUT1	protein O-glucosyltransferase 1 isoform X2 [Canis lupus familiaris]	2	1	1	46.1	9	198000	20500	9.7	-	-	0	165000	62300	2.6	-	-	0	403000	277000	1.5	-	-	0	3	Y	Y	N	N
XP_849792	PPP1R11	protein phosphatase 1 regulatory subunit 11 isoform X1 [Canis lupus familiaris]	21	3	3	13.9	6.67	-	-	0	-	-	0	313000	158000	2	-	-	0	329000	132000	2.5	-	-	0	2	Y	N	N	N
XP_013974976	PPP1R12A	protein phosphatase 1 regulatory subunit 12A isoform X1 [Canis lupus familiaris]	6	4	4	121.5	5.55	ID only	ID only	1	-	-	0	ID only	ID only	1	123000	96800	1.3	ID only	ID only	1	305000	233000	1.3	3	N	Y	N	N
XP_005616686	PPP1R14A	protein phosphatase 1 regulatory subunit 14A [Canis lupus familiaris]	13	1	1	8.7	4.7	-	-	0	-	-	0	-	-	0	-	-	0	1150000	471000	2.5	-	-	0	1	N	Y	N	N
XP_533244	PPP1R14B	protein phosphatase 1 regulatory subunit 14B [Canis lupus familiaris]	12	1	1	21.2	6.27	-	-	0	-	-	0	518000	223000	2.3	-	-	0	-	-	0	-	-	0	1	N	Y	N	N
XP_022277523	PPP1R3E	protein phosphatase 1 regulatory subunit 3E [Canis lupus familiaris]	7	1	1	30.6	11.3	-	-	0	-	-	0	-	-	0	-	-	0	-	-	0	ID only	ID only	1	1	N	Y	N	N
XP_005636023	LOC100855698; PPP1R7	protein phosphatase 1 regulatory subunit 7 isoform X1 [Canis lupus familiaris]	25	8	8	41.7	5.03	2520000	52900	47.7	-	-	0	1760000	618000	2.9	-	-	0	5210000	2730000	1.9	-	-	0	3	Y	Y	N	N
XP_022272343	PPP1R7; LOC477430	protein phosphatase 1 regulatory subunit 7-like isoform X1 [Canis lupus familiaris]	2	1	1	60.8	8.76	-	-	0	ID only	ID only	1	-	-	0	-	-	0	-	-	0	-	-	0	1	N	Y	N	N
XP_005626126	PPM1B	protein phosphatase 1B isoform X1 [Canis lupus familiaris]	2	1	1	53.6	5.12	-	-	0	-	-	0	237000	28400	8.4	-	-	0	-	-	0	218000	87800	2.5	2	N	Y	N	N
XP_543574	PPM1F	protein phosphatase 1F [Canis lupus familiaris]	13	9	9	48.3	5.19	3900000	409000	9.5	-	-	0	4160000	1360000	3.1	ID only	ID only	1	11100000	5030000	2.2	216000	202000	1.1	3	Y	Y	N	N
NP_001106639	PPP1R2	protein phosphatase inhibitor 2 [Canis lupus familiaris]	8	1	1	22.8	4.72	-	-	0	-	-	0	233000	134000	1.7	-	-	0	494000	483000	1	-	-	0	2	N	Y	N	N
XP_860745	PPME1	protein phosphatase methylesterase 1 [Canis lupus familiaris]	8	2	2	42.3	5.97	-	-	0	-	-	0	-	-	0	-	-	0	150000	96900	1.5	-	-	0	1	N	Y	N	N
XP_533061	LOC475852; S100A11	protein S100-A11 [Canis lupus familiaris]	13	4	4	48.1	10.17	ID only	ID only	1	-	-	0	537000	197000	2.7	-	-	0	9380000	4180000	2.2	-	-	0	3	Y	Y	N	N
XP_022276475	S100A8	protein S100-A8 isoform X1 [Canis lupus familiaris]	12	2	2	10.4	5.45	214000	38500	5.6	-	-	0	1110000	579000	1.9	-	-	0	521000	357000	1.5	-	-	0	3	N	Y	N	N
XP_850437	SEC13	protein SEC13 homolog isoform X1 [Canis lupus familiaris]	5	1	1	35.5	5.38	-	-	0	-	-	0	ID only	ID only	1	-	-	0	ID only	ID only	1	ID only	ID only	1	2	N	Y	N	N
XP_005633996	SUGT1	protein SGT1 homolog [Canis lupus familiaris]	4	2	2	38.3	5.83	ID only	ID only	1	-	-	0	141000	25600	5.5	-	-	0	1080000	310000	3.5	58300	24200	2.4	3	Y	Y	N	N
XP_022279009	SLFN14; LOC491140	protein SLFN14 [Canis lupus familiaris]	1	2	2	105.6	7.49	-	-	0	24900	19300	1.3	440000	214000	2.1	410000	198000	2.1	506000	365000	1.4	304000	164000	1.9	3	N	Y	N	N
XP_022276673	SMG7	protein SMG7 isoform X1 [Canis lupus familiaris]	1	1	1	137	8.6	ID only	ID only	1	-	-	0	-	-	0	-	-	0	-	-	0	-	-	0	1	N	N	N	N
XP_545076	TFG	protein TFG isoform X1 [Canis lupus familiaris]	7	2	2	43.3	5.19	307000	28200	10.9	-	-	0	ID only	ID only	1	-	-	0	502000	142000	3.5	-	-	0	3	Y	Y	N	N
XP_022277656	SEC23A	protein transport protein Sec23A isoform X1 [Canis lupus familiaris]	2	1	1	88.5	7.61	-	-	0	-	-	0	-	-	0	-	-	0	ID only	ID only	1	-	-	0	1	N	Y	N	N
XP_005619095	LOC100855957; SEC24C	protein transport protein Sec24C isoform X1 [Canis lupus familiaris]	1	1	1	121.2	6.98	ID only	ID only	1	-	-	0	-	-	0	-	-	0	ID only	ID only	1	110000	61700	1.8	2	N	Y	N	N
XP_532856	TSSC1; EIPR1	protein TSSC1 isoform X1 [Canis lupus familiaris]	3	1	1	43.5	5.06	ID only	ID only	1	-	-	0	-	-	0	-	-	0	-	-	0	-	-	0	1	N	Y	N	N
XP_022276375	TTYH3	protein tweety homolog 3 [Canis lupus familiaris]	2	1	1	63.9	7.3	-	-	0	63400	57200	1.1	-	-	0	274000	298000	0.9	-	-	0	269000	231000	1.2	3	N	Y	N	N
XP_013973573	PTP4A1	protein tyrosine phosphatase type IVA 1 [Canis lupus familiaris]	5	1	1	19.8	8.97	515000	83600	6.2	ID only	36700	0.5	169000	28100	6	127000	54700	2.3	223000	36900	6	222000	100000	2.2	3	Y	Y	N	N
XP_540438	UNC13D	protein unc-13 homolog D isoform X1 [Canis lupus familiaris]	15	12	12	123.2	6.71	67900	61900	1.1	32400	46200	0.7	475000	156000	3.1	1060000	538000	2	24700000	2190000	11.3	3390000	2230000	1.5	3	Y	Y	N	N
XP_003434424	UNC45A	protein unc-45 homolog A isoform X1 [Canis lupus familiaris]	2	1	1	103.6	6.73	-	-	0	-	-	0	-	-	0	-	-	0	ID only	ID only	1	-	-	0	1	N	Y	N	N
XP_005616684	YIF1B	protein YIF1B isoform X1 [Canis lupus familiaris]	4	1	1	34.2	9.14	-	-	0	ID only	ID only	1	-	-	0	-	-	0	-	-	0	-	-	0	1	N	Y	N	N
XP_535391	PADI3	protein-arginine deiminase type-3 [Canis lupus familiaris]	14	18	18	76.6	5.59	2880000	2320000	1.2	1030000	230000	4.5	19900000	11600000	1.7	867000	221000	3.9	24400000	21600000	1.1	2620000	851000	3.1	3	Y	N	N	N
XP_005623230	TGM1	protein-glutamine gamma-glutamyltransferase K isoform X1 [Canis lupus familiaris]	1	1	1	95.8	6.37	-	-	0	-	-	0	-	-	0	-	-	0	ID only	ID only	1	-	-	0	1	N	N	N	N
XP_533447	PCMT1	protein-L-isoaspartate(D-aspartate) O-methyltransferase isoform X1 [Canis lupus familiaris]	27	5	5	30.3	6.61	-	-	0	-	-	0	2160000	614000	3.5	-	-	0	3980000	887000	4.5	-	-	0	2	Y	Y	N	N
XP_005632791	F2RL3	proteinase-activated receptor 4 [Canis lupus familiaris]	3	1	1	41.6	7.46	-	-	0	ID only	ID only	1	-	-	0	-	-	0	-	-	0	1410000	710000	2	2	N	Y	N	N
XP_022271518	PLP2	proteolipid protein 2 [Canis lupus familiaris]	14	1	1	10.6	6.77	-	-	0	36900	1180	31.3	-	-	0	125000	120000	1	-	-	0	218000	101000	2.2	3	Y	Y	N	N
XP_003639742	LOC100856539; F2	prothrombin [Canis lupus familiaris]	22	32	32	70.3	6	121000000	150000	805.4	4020000	ID only	10	189000000	2400000	78.4	10600000	133000	79.9	243000000	6000000	40.6	11200000	233000	47.9	3	Y	Y	Y	N
XP_022264546	SRC	proto-oncogene tyrosine-protein kinase Src isoform X1 [Canis lupus familiaris]	41	17	15	62.1	8.02	12900000	1850000	7	1450000	745000	1.9	11700000	3460000	3.4	7260000	3740000	1.9	22500000	12600000	1.8	14600000	6960000	2.1	3	Y	Y	Y	N
XP_542134	VAV1	proto-oncogene vav isoform X1 [Canis lupus familiaris]	2	5	5	98.4	6.62	-	-	0	-	-	0	ID only	ID only	1	-	-	0	617000	489000	1.3	ID only	ID only	1	2	N	Y	N	N
XP_536461	FAT2	protocadherin Fat 2 [Canis lupus familiaris]	0	1	1	480.2	5.17	-	-	0	-	-	0	-	-	0	ID only	ID only	1	-	-	0	-	-	0	1	N	Y	N	N
XP_853313	HDHD1; PUDP	pseudouridine-5'-phosphatase [Canis lupus familiaris]	10	1	1	25.5	5.33	-	-	0	-	-	0	271000	59800	4.5	-	-	0	390000	296000	1.3	-	-	0	2	N	Y	N	N
XP_532617	PNP	purine nucleoside phosphorylase [Canis lupus familiaris]	21	22	22	32.3	6.87	25700000	7960000	3.2	-	-	0	57200000	42300000	1.4	823000	130000	6.3	134000000	73500000	1.8	1990000	876000	2.3	3	Y	Y	Y	N
XP_537659	NPEPPS	puromycin-sensitive aminopeptidase isoform X1 [Canis lupus familiaris]	3	27	27	96.9	5.53	2810000	3070000	0.9	-	-	0	41700000	30100000	1.4	472000	121000	3.9	57500000	42100000	1.4	ID only	ID only	1	3	N	Y	N	N
XP_005627970	TATDN1	putative deoxyribonuclease TATDN1 isoform X1 [Canis lupus familiaris]	3	1	1	36.5	7.28	ID only	ID only	1	-	-	0	192000	114000	1.7	-	-	0	452000	233000	1.9	-	-	0	3	N	Y	N	N
XP_022283775	HYI	putative hydroxypyruvate isomerase isoform X4 [Canis lupus familiaris]	26	4	4	32.7	5.95	349000	143000	2.4	-	-	0	3130000	2310000	1.4	-	-	0	4080000	2380000	1.7	-	-	0	3	N	Y	N	N
XP_532892	PTRHD1	putative peptidyl-tRNA hydrolase PTRHD1 [Canis lupus familiaris]	10	1	1	15.9	8.81	-	-	0	-	-	0	-	-	0	-	-	0	116000	79300	1.5	-	-	0	1	N	Y	N	N
XP_005636570	PLBD2	putative phospholipase B-like 2 [Canis lupus familiaris]	3	1	1	67	7.68	-	-	0	-	-	0	-	-	0	-	-	0	ID only	ID only	1	-	-	0	1	N	Y	N	N
XP_022262231	PXK	PX domain-containing protein kinase-like protein isoform X16 [Canis lupus familiaris]	4	2	2	66.1	9.11	-	-	0	-	-	0	249000	ID only	10	-	-	0	303000	171000	1.8	-	-	0	2	N	Y	N	N
XP_013965253	PDXK	pyridoxal kinase isoform X1 [Canis lupus familiaris]	4	1	1	32.2	6.07	-	-	0	-	-	0	-	-	0	-	-	0	ID only	ID only	1	-	-	0	1	N	Y	N	N
XP_013975520	PROSC; PLPBP	pyridoxal phosphate homeostasis protein isoform X1 [Canis lupus familiaris]	15	3	3	30.5	7.49	-	-	0	-	-	0	305000	110000	2.8	-	-	0	1010000	513000	2	-	-	0	2	Y	Y	N	N
XP_537661	PNPO	pyridoxine-5'-phosphate oxidase isoform X1 [Canis lupus familiaris]	7	1	1	30	7.74	-	-	0	-	-	0	-	-	0	-	-	0	212000	74100	2.9	-	-	0	1	N	Y	N	N
XP_539200	PYCRL; PYCR3	pyrroline-5-carboxylate reductase 3 [Canis lupus familiaris]	4	1	1	29.9	7.23	-	-	0	-	-	0	270000	162000	1.7	248000	115000	2.2	486000	292000	1.7	226000	118000	1.9	2	N	N	N	N
XP_533778	PDHB	pyruvate dehydrogenase E1 component subunit beta, mitochondrial isoform X1 [Canis lupus familiaris]	6	2	2	39.2	6.65	-	-	0	-	-	0	-	-	0	47800	32300	1.5	-	-	0	74600	40400	1.8	2	N	Y	N	N
XP_013964909	PKM	pyruvate kinase PKM isoform X1 [Canis lupus familiaris]	50	35	23	64.3	7.87	109000000	54300000	2	17700000	3740000	4.7	152000000	94700000	1.6	20400000	11500000	1.8	30800000	19500000	1.6	41700000	27700000	1.5	3	N	Y	Y	Y
XP_022268508	PKM	pyruvate kinase PKM isoform X2 [Canis lupus familiaris]	64	36	3	64.5	7.74	ID only	ID only	1	-	-	0	682000	547000	1.2	-	-	0	284000000	208000000	1.4	-	-	0	3	N	Y	N	N
NP_001239326	CRYZ	quinone oxidoreductase [Canis lupus familiaris]	7	1	1	35.5	8.57	-	-	0	-	-	0	ID only	ID only	1	-	-	0	-	-	0	-	-	0	1	N	Y	N	N
XP_022260207	TP53I3	quinone oxidoreductase PIG3 [Canis lupus familiaris]	24	5	5	35.4	6.8	-	-	0	-	-	0	910000	598000	1.5	-	-	0	2140000	1300000	1.6	-	-	0	2	N	Y	N	N
NP_001003185	GDI1	rab GDP dissociation inhibitor alpha [Canis lupus familiaris]	35	37	28	50.5	5.14	131000000	28700000	4.6	395000	106000	3.7	221000000	133000000	1.7	4130000	2010000	2.1	286000000	224000000	1.3	3840000	1750000	2.2	3	Y	Y	N	N
NP_001003184	GDI2	rab GDP dissociation inhibitor beta [Canis lupus familiaris]	26	29	21	50.3	6.47	35700000	5240000	6.8	44000	11700	3.8	47500000	20700000	2.3	656000	289000	2.3	56600000	34700000	1.6	745000	386000	1.9	3	Y	Y	Y	N
XP_022276829	CHML	rab proteins geranylgeranyltransferase component A 2 [Canis lupus familiaris]	2	1	1	73.2	5.07	-	-	0	-	-	0	1060000	114000	9.3	-	-	0	-	-	0	-	-	0	1	N	N	N	N
XP_022279532	RABEPK	rab9 effector protein with kelch motifs isoform X1 [Canis lupus familiaris]	8	2	2	44.2	5.87	-	-	0	-	-	0	620000	342000	1.8	-	-	0	309000	306000	1	-	-	0	2	N	N	N	N
XP_005619917	ANKFY1	rabankyrin-5 isoform X1 [Canis lupus familiaris]	1	1	1	128.8	6.01	-	-	0	-	-	0	-	-	0	-	-	0	ID only	ID only	1	-	-	0	1	N	Y	N	N
XP_022276846	AKT3	RAC-gamma serine/threonine-protein kinase isoform X1 [Canis lupus familiaris]	6	2	2	59.9	6.29	161000	16800	9.5	-	-	0	-	-	0	-	-	0	-	-	0	-	-	0	1	N	Y	N	N
XP_022274049	RDX	radixin isoform X1 [Canis lupus familiaris]	12	11	2	71	6.71	111000	86100	1.3	-	-	0	883000	437000	2	-	-	0	1720000	1180000	1.5	ID only	ID only	1	3	N	Y	N	N
XP_542329	LAMTOR1	ragulator complex protein LAMTOR1 [Canis lupus familiaris]	15	1	1	17.8	5.15	-	-	0	-	-	0	-	-	0	ID only	ID only	1	-	-	0	74400	52900	1.4	2	N	Y	N	N
XP_005622770	LAMTOR2	ragulator complex protein LAMTOR2 isoform X1 [Canis lupus familiaris]	25	1	1	15.8	6.74	-	-	0	-	-	0	-	-	0	-	-	0	ID only	ID only	1	-	-	0	1	N	Y	N	N
XP_022283789	LOC102156511	ralBP1-associated Eps domain-containing protein 1-like [Canis lupus familiaris]	3	1	1	86.4	5.57	ID only	ID only	1	-	-	0	178000	ID only	10	-	-	0	-	-	0	-	-	0	2	N	Y	N	N
XP_546874	RANBP10	ran-binding protein 10 isoform X1 [Canis lupus familiaris]	2	1	1	67.1	6.62	-	-	0	-	-	0	-	-	0	ID only	ID only	1	-	-	0	ID only	ID only	1	2	N	Y	N	N
XP_005636631	RANBP1	ran-specific GTPase-activating protein isoform X1 [Canis lupus familiaris]	50	7	7	24.1	5.01	794000	247000	3.2	-	-	0	1980000	1190000	1.7	-	-	0	16200000	13600000	1.2	-	-	0	3	N	Y	N	N
XP_022269141	RAP1GDS1	rap1 GTPase-GDP dissociation stimulator 1 [Canis lupus familiaris]	19	7	7	69.6	5.2	1460000	45400	32.1	-	-	0	2290000	1010000	2.3	-	-	0	3000000	1770000	1.7	-	-	0	3	Y	Y	N	N
XP_005634195	RASA3	ras GTPase-activating protein 3 isoform X1 [Canis lupus familiaris]	44	28	28	95.7	7.43	87500	167000	0.5	1670000	917000	1.8	3030000	2100000	1.4	10100000	5280000	1.9	11000000	11300000	1	27600000	16200000	1.7	3	N	Y	N	N
XP_536199	IQGAP1	ras GTPase-activating-like protein IQGAP1 [Canis lupus familiaris]	14	16	15	189	6.34	113000	104000	1.1	84100	63100	1.3	1970000	1040000	1.9	2520000	1370000	1.8	4980000	3150000	1.6	2560000	1780000	1.4	3	N	Y	N	N
XP_005618244	IQGAP2	ras GTPase-activating-like protein IQGAP2 isoform X1 [Canis lupus familiaris]	12	13	12	178.1	6.28	ID only	ID only	1	ID only	ID only	1	ID only	ID only	1	1600000	769000	2.1	ID only	456000	0.5	3330000	2030000	1.6	3	N	Y	N	N
XP_005631575	RASGRP2	RAS guanyl-releasing protein 2 isoform X1 [Canis lupus familiaris]	11	6	6	68.9	7.8	24200	4120	5.9	25200	ID only	10	2180000	247000	8.8	1590000	619000	2.6	2350000	1200000	2	1060000	682000	1.6	3	Y	Y	N	N
XP_535177	RSU1	ras suppressor protein 1 isoform X1 [Canis lupus familiaris]	68	14	14	31.5	8.63	40900000	16900000	2.4	3550000	1240000	2.9	100000000	42200000	2.4	27800000	12000000	2.3	192000000	94600000	2	63300000	35300000	1.8	3	Y	Y	Y	N
XP_013966384	LOC488486; RAPH1	ras-associated and pleckstrin homology domains-containing protein 1 [Canis lupus familiaris]	1	1	1	129.2	8.68	1080000	18400000	0.1	-	-	0	-	-	0	-	-	0	-	-	0	-	-	0	1	N	N	N	N
XP_005621078	RAC1	ras-related C3 botulinum toxin substrate 1 isoform X1 [Canis lupus familiaris]	26	5	5	23.5	8.48	-	-	0	-	-	0	7760000	2740000	2.8	-	-	0	-	-	0	-	-	0	1	N	Y	N	N
NP_001003274	RAC1	ras-related C3 botulinum toxin substrate 1 precursor [Canis lupus familiaris]	48	8	8	21.4	8.5	2820000	777000	3.6	1190000	785000	1.5	-	-	0	4500000	1680000	2.7	15600000	4620000	3.4	28100000	10700000	2.6	3	Y	Y	N	N
XP_852073	RRAGB	ras-related GTP-binding protein B isoform X1 [Canis lupus familiaris]	3	1	1	43.2	6.21	-	-	0	-	-	0	-	-	0	37900	ID only	10	-	-	0	56000	ID only	10	2	Y	Y	N	N
XP_533617	RRAS	ras-related protein R-Ras [Canis lupus familiaris]	9	1	1	23.6	6.55	ID only	ID only	1	154000	125000	1.2	-	-	0	-	-	0	-	-	0	173000	51600	3.3	2	N	Y	N	N
NP_001003277	RAB10	ras-related protein Rab-10 [Canis lupus familiaris]	29	5	3	22.5	8.38	-	-	0	114000	130000	0.9	-	-	0	59000	26500	2.2	ID only	ID only	1	631000	223000	2.8	3	Y	Y	N	N
NP_001003276	RAB11A	ras-related protein Rab-11A [Canis lupus familiaris]	32	11	11	24.4	6.57	11900000	3790000	3.1	1160000	1060000	1.1	23000000	8560000	2.7	-	-	0	-	-	0	9130000	4000000	2.3	3	Y	Y	N	N
XP_854399	RAB11B	ras-related protein Rab-11B [Canis lupus familiaris]	42	9	9	24.5	5.94	-	-	0	-	-	0	-	-	0	4550000	2400000	1.9	39000000	10600000	3.7	-	-	0	2	N	Y	Y	N
NP_001300788	RAB13	ras-related protein Rab-13 [Canis lupus familiaris]	18	3	2	22.7	9.29	-	-	0	-	-	0	-	-	0	242000	88300	2.7	ID only	ID only	1	532000	265000	2	2	Y	Y	N	N
XP_532048	RAB14	ras-related protein Rab-14 [Canis lupus familiaris]	53	14	12	23.9	6.21	5850000	1640000	3.6	1250000	984000	1.3	15100000	6150000	2.5	3560000	2460000	1.4	30700000	8910000	3.4	7710000	5220000	1.5	3	Y	Y	N	N
XP_005617019	RAB18	ras-related protein Rab-18 isoform X1 [Canis lupus familiaris]	8	1	1	20.6	5.07	-	-	0	-	-	0	-	-	0	ID only	ID only	1	-	-	0	ID only	ID only	1	2	N	Y	N	N
NP_001003153	RAB1A	ras-related protein Rab-1A [Canis lupus familiaris]	46	6	2	22.7	6.21	2360000	890000	2.7	-	-	0	3950000	1500000	2.6	728000	406000	1.8	3390000	936000	3.6	1310000	613000	2.1	3	Y	Y	N	N
XP_022261337	RAB1B	ras-related protein Rab-1B isoform X1 [Canis lupus familiaris]	45	7	3	23.2	7.09	-	-	0	ID only	94200	0.5	303000	100000	3	1590000	833000	1.9	7690000	1940000	4	7090000	2840000	2.5	3	Y	Y	N	N
XP_003431485	RAB21	ras-related protein Rab-21, partial [Canis lupus familiaris]	8	1	1	23.5	7.94	-	-	0	-	-	0	-	-	0	-	-	0	ID only	ID only	1	ID only	ID only	1	1	N	Y	N	N
NP_001041595	RAB27A	ras-related protein Rab-27A [Canis lupus familiaris]	32	6	6	25	5.68	885000	199000	4.4	1600000	541000	3	-	-	0	3500000	1350000	2.6	995000	131000	7.6	9790000	4440000	2.2	3	Y	Y	N	N
NP_001003318	RAB2A	ras-related protein Rab-2A [Canis lupus familiaris]	20	3	3	23.5	6.54	-	-	0	-	-	0	228000	62400	3.7	134000	63500	2.1	965000	253000	3.8	662000	281000	2.4	2	Y	Y	N	N
XP_022263295	RAB30	ras-related protein Rab-30 [Canis lupus familiaris]	16	2	1	23	4.97	-	-	0	-	-	0	-	-	0	-	-	0	-	-	0	ID only	ID only	1	1	N	Y	N	N
XP_022280399	LOC100856634; RAB32	ras-related protein Rab-32 [Canis lupus familiaris]	17	2	2	23.1	8.85	-	-	0	101000	77700	1.3	-	-	0	1360000	473000	2.9	71300	ID only	10	828000	310000	2.7	3	Y	Y	N	N
XP_003639768	LOC100856686; RAB43	ras-related protein Rab-43 isoform X1 [Canis lupus familiaris]	10	2	1	23.2	5.64	-	-	0	-	-	0	-	-	0	-	-	0	-	-	0	71600	16100	4.5	1	N	N	N	N
XP_005618897	RAB4A	ras-related protein Rab-4A isoform X1 [Canis lupus familiaris]	15	5	4	25.6	8.06	ID only	60200	0.5	41600	44000	0.9	804000	340000	2.4	125000	94800	1.3	2150000	636000	3.4	169000	126000	1.3	3	Y	Y	N	N
XP_531627	RAB5B	ras-related protein Rab-5B [Canis lupus familiaris]	19	3	1	23.7	8.13	-	-	0	-	-	0	-	-	0	-	-	0	-	-	0	ID only	ID only	1	1	N	Y	N	N
NP_001003261	RAB5C	ras-related protein Rab-5C [Canis lupus familiaris]	19	3	3	23.4	8.41	-	-	0	ID only	ID only	1	-	-	0	342000	158000	2.2	808000	147000	5.5	836000	29500	28.3	3	Y	Y	N	N
NP_001003316	RAB7A	ras-related protein Rab-7a [Canis lupus familiaris]	31	6	6	23.5	6.7	1430000	414000	3.4	ID only	ID only	1	4400000	1290000	3.4	1180000	562000	2.1	12300000	3050000	4	1870000	620000	3	3	Y	Y	Y	N
NP_001003152	RAB8A	ras-related protein Rab-8A [Canis lupus familiaris]	17	4	1	23.7	9.07	-	-	0	ID only	ID only	1	518000	ID only	10	484000	ID only	10	975000	297000	3.3	901000	ID only	10	3	Y	Y	N	N
XP_005638551	RAB8B	ras-related protein Rab-8B [Canis lupus familiaris]	12	2	1	23.8	9.17	-	-	0	-	-	0	-	-	0	-	-	0	-	-	0	ID only	ID only	1	1	N	Y	N	N
XP_013976304	RALA	ras-related protein Ral-A [Canis lupus familiaris]	35	5	3	23.5	7.11	-	-	0	ID only	ID only	1	-	-	0	778000	348000	2.2	-	-	0	2340000	1230000	1.9	3	N	Y	N	N
XP_005631961	RALB	ras-related protein Ral-B [Canis lupus familiaris]	36	4	2	23.4	6.62	-	-	0	ID only	ID only	1	-	-	0	143000	64800	2.2	-	-	0	1440000	624000	2.3	3	Y	Y	N	N
XP_863066	RAP1A	ras-related protein Rap-1A isoform X2 [Canis lupus familiaris]	61	11	1	21	6.67	-	-	0	-	-	0	-	-	0	ID only	ID only	1	-	-	0	ID only	ID only	1	2	N	Y	N	N
XP_851250	RAP1B	ras-related protein Rap-1b [Canis lupus familiaris]	86	16	15	20.8	5.78	7250000	2480000	2.9	17200000	10200000	1.7	24400000	14300000	1.7	51300000	23100000	2.2	38400000	15400000	2.5	122000000	41800000	2.9	3	Y	Y	Y	N
XP_005634148	RAP2A	ras-related protein Rap-2a [Canis lupus familiaris]	17	4	4	33.4	8.92	-	-	0	-	-	0	-	-	0	1050000	500000	2.1	-	-	0	632000	272000	2.3	2	Y	Y	N	N
XP_022264475	RAP2B	ras-related protein Rap-2b [Canis lupus familiaris]	44	5	5	13.3	5.07	-	-	0	69900	64700	1.1	-	-	0	512000	216000	2.4	-	-	0	1550000	563000	2.8	3	Y	Y	N	N
XP_538176	RAP2C	ras-related protein Rap-2c isoform X1 [Canis lupus familiaris]	15	2	2	20.7	4.94	-	-	0	-	-	0	-	-	0	81100	52200	1.6	-	-	0	194000	80400	2.4	2	N	Y	N	N
XP_022281073	REEP2	receptor expression-enhancing protein 2 isoform X1 [Canis lupus familiaris]	4	1	1	30.2	9.61	-	-	0	-	-	0	-	-	0	-	-	0	-	-	0	ID only	ID only	1	1	N	N	N	N
XP_005626337	GNB2L1; RACK1	receptor of activated protein C kinase 1 [Canis lupus familiaris]	21	4	4	35.1	7.69	-	-	0	-	-	0	512000	278000	1.8	-	-	0	1970000	1060000	1.9	-	-	0	2	N	Y	N	N
XP_005622335	PTPRC	receptor-type tyrosine-protein phosphatase C isoform X1 [Canis lupus familiaris]	1	1	1	147.6	5.83	-	-	0	-	-	0	-	-	0	-	-	0	-	-	0	ID only	ID only	1	1	N	Y	N	N
XP_022281085	PTPRD	receptor-type tyrosine-protein phosphatase delta isoform X1 [Canis lupus familiaris]	1	1	1	216.3	6.51	-	-	0	-	-	0	ID only	ID only	1	-	-	0	-	-	0	-	-	0	1	N	N	N	N
XP_022261134	PTPRJ	receptor-type tyrosine-protein phosphatase eta isoform X1 [Canis lupus familiaris]	9	8	8	135.4	5.27	-	-	0	ID only	ID only	1	-	-	0	262000	227000	1.2	-	-	0	2900000	559000	5.2	3	N	Y	N	N
XP_005619150	FAM213A	redox-regulatory protein FAM213A isoform X1 [Canis lupus familiaris]	13	3	3	30.7	8.21	-	-	0	-	-	0	-	-	0	-	-	0	-	-	0	407000	34400	11.8	1	N	N	N	N
XP_022267459	RGS10	regulator of G-protein signaling 10 isoform X1 [Canis lupus familiaris]	19	3	3	20.7	5.94	ID only	ID only	1	-	-	0	532000	174000	3.1	-	-	0	1400000	410000	3.4	-	-	0	3	Y	Y	N	N
XP_849782	RGS18	regulator of G-protein signaling 18 [Canis lupus familiaris]	5	3	3	27.7	7.17	947000	185000	5.1	-	-	0	561000	119000	4.7	353000	169000	2.1	1410000	439000	3.2	148000	80600	1.8	3	Y	Y	N	N
XP_013962712	RGS19	regulator of G-protein signaling 19 isoform X1 [Canis lupus familiaris]	13	1	1	24.7	6.34	-	-	0	-	-	0	ID only	ID only	1	-	-	0	-	-	0	-	-	0	1	N	Y	N	N
XP_005623664	RGS6	regulator of G-protein signaling 6 isoform X1 [Canis lupus familiaris]	3	1	1	63.1	8.51	-	-	0	-	-	0	-	-	0	-	-	0	ID only	ID only	1	-	-	0	1	N	Y	N	N
XP_022276828	RGS7	regulator of G-protein signaling 7 isoform X1 [Canis lupus familiaris]	5	2	2	55.6	8.02	-	-	0	-	-	0	-	-	0	323000	ID only	10	-	-	0	222000	75100	3	2	Y	N	N	N
XP_003435545	LOC100682978; ATP6AP2	renin receptor isoform X2 [Canis lupus familiaris]	9	2	2	39.4	5.67	-	-	0	-	-	0	ID only	ID only	1	ID only	ID only	1	490000	ID only	10	305000	75400	4.1	2	N	Y	N	N
XP_005631099	RTN3	reticulon-3 isoform X1 [Canis lupus familiaris]	2	3	3	112.6	4.82	-	-	0	1200000	1200000	1	-	-	0	1700000	881000	1.9	325000	267000	1.2	4780000	2030000	2.4	3	N	Y	N	N
XP_022280458	RTN4	reticulon-4 isoform X1 [Canis lupus familiaris]	1	1	1	108.5	4.56	-	-	0	204000	36500	5.6	-	-	0	-	-	0	-	-	0	73200	ID only	10	2	Y	Y	N	N
XP_022280022	LOC111097621	reticulon-4-like [Canis lupus familiaris]	18	1	1	21.6	4.56	-	-	0	-	-	0	-	-	0	-	-	0	-	-	0	ID only	ID only	1	1	N	Y	N	N
NP_001003156	PDE6D	retinal rod rhodopsin-sensitive cGMP 3',5'-cyclic phosphodiesterase subunit delta [Canis lupus familiaris]	21	2	2	17.4	5.67	-	-	0	-	-	0	-	-	0	-	-	0	524000	106000	4.9	-	-	0	1	N	N	N	N
XP_005629711	RARRES2	retinoic acid receptor responder protein 2 [Canis lupus familiaris]	15	1	1	18.6	9.01	-	-	0	-	-	0	-	-	0	-	-	0	-	-	0	73500	9060	8.1	1	N	Y	Y	N
XP_022279623	SCPEP1	retinoid-inducible serine carboxypeptidase [Canis lupus familiaris]	4	4	4	57.2	6.62	ID only	ID only	1	-	-	0	ID only	ID only	1	-	-	0	5600000	258000	21.7	ID only	ID only	1	3	N	Y	N	N
XP_534969	RBP4	retinol-binding protein 4 [Canis lupus familiaris]	71	10	10	22.9	5.48	ID only	ID only	1	-	-	0	5400000	414000	13.1	-	-	0	8940000	621000	14.4	-	-	0	3	Y	Y	N	N
XP_013972931	ASPRV1	retroviral-like aspartic protease 1 [Canis lupus familiaris]	20	4	4	38.5	7.09	-	-	0	-	-	0	-	-	0	-	-	0	3940000	2040000	1.9	-	-	0	1	N	N	N	N
XP_013971707	ARHGDIA	rho GDP-dissociation inhibitor 1 [Canis lupus familiaris]	30	11	11	23.4	5.2	58500000	19800000	3	947000	355000	2.7	113000000	47800000	2.4	2520000	1190000	2.1	185000000	89000000	2.1	2440000	2310000	1.1	3	Y	Y	Y	N
XP_543793	ARHGDIB	rho GDP-dissociation inhibitor 2 [Canis lupus familiaris]	45	4	4	22.8	5.39	ID only	ID only	1	-	-	0	3690000	1950000	1.9	-	-	0	4430000	1600000	2.8	-	-	0	3	N	Y	Y	N
XP_005631109	ARHGAP1	rho GTPase-activating protein 1 isoform X1 [Canis lupus familiaris]	26	13	13	50.6	6.54	14100000	1130000	12.5	161000	252000	0.6	9430000	2370000	4	2320000	1450000	1.6	24700000	11900000	2.1	3400000	3440000	1	3	Y	Y	N	N
NP_001273896	ARHGAP18	rho GTPase-activating protein 18 [Canis lupus familiaris]	9	5	5	74.5	6.44	792000	357000	2.2	331000	206000	1.6	2860000	688000	4.2	2030000	1110000	1.8	6080000	2670000	2.3	2470000	2220000	1.1	3	Y	Y	N	N
XP_022263015	HMHA1; ARHGAP45	rho GTPase-activating protein 45 isoform X1 [Canis lupus familiaris]	6	4	4	125.7	6.25	-	-	0	-	-	0	210000	109000	1.9	233000	73100	3.2	659000	482000	1.4	691000	329000	2.1	2	Y	Y	N	N
NP_001002995	ARHGEF2	rho guanine nucleotide exchange factor 2 isoform A [Canis lupus familiaris]	4	3	3	111.4	7.4	-	-	0	-	-	0	-	-	0	651000	60000	10.8	-	-	0	424000	232000	1.8	2	N	Y	N	N
XP_853451	RHOF	rho-related GTP-binding protein RhoF [Canis lupus familiaris]	13	2	2	23.1	8.34	-	-	0	-	-	0	-	-	0	-	-	0	-	-	0	133000	34500	3.8	1	N	Y	N	N
XP_542335	RHOG	rho-related GTP-binding protein RhoG [Canis lupus familiaris]	13	2	2	28.2	7.84	-	-	0	67700	50400	1.3	-	-	0	-	-	0	-	-	0	286000	103000	2.8	2	N	Y	N	N
XP_531699	RIBC2	RIB43A-like with coiled-coils protein 2 [Canis lupus familiaris]	3	1	1	45.1	8.76	-	-	0	ID only	ID only	1	-	-	0	-	-	0	-	-	0	-	-	0	1	N	N	N	N
XP_022260297	RBKS	ribokinase isoform X1 [Canis lupus familiaris]	12	3	3	39.7	8.41	ID only	ID only	1	-	-	0	980000	683000	1.4	-	-	0	2580000	1570000	1.6	-	-	0	3	N	N	N	N
XP_022283380	RNASE4	ribonuclease 4 isoform X1 [Canis lupus familiaris]	9	3	3	22.7	9.51	-	-	0	-	-	0	882000	169000	5.2	190000	ID only	10	4230000	537000	7.9	227000	ID only	10	2	Y	Y	N	N
XP_005631766	RNH1	ribonuclease inhibitor [Canis lupus familiaris]	37	11	11	46.4	4.87	5090000	703000	7.2	ID only	ID only	1	4510000	1800000	2.5	ID only	ID only	1	9860000	4910000	2	-	-	0	3	Y	Y	N	N
XP_003639654	LOC100856455; RPIA	ribose-5-phosphate isomerase isoform X1 [Canis lupus familiaris]	4	5	5	33.3	8.76	1870000	497000	3.8	-	-	0	3580000	2620000	1.4	-	-	0	6580000	3880000	1.7	ID only	ID only	1	3	N	Y	N	N
XP_850853	PRPS1	ribose-phosphate pyrophosphokinase 1 [Canis lupus familiaris]	9	2	2	34.8	6.98	-	-	0	-	-	0	-	-	0	-	-	0	981000	270000	3.6	-	-	0	1	N	Y	N	N
XP_861314	RPE	ribulose-phosphate 3-epimerase isoform X1 [Canis lupus familiaris]	19	3	3	25	5.58	-	-	0	-	-	0	538000	302000	1.8	-	-	0	1890000	266000	7.1	-	-	0	2	N	Y	N	N
XP_005636175	RILPL2	RILP-like protein 2 isoform X1 [Canis lupus familiaris]	10	2	2	24.4	4.75	-	-	0	-	-	0	-	-	0	-	-	0	ID only	ID only	1	103000	61100	1.7	1	N	Y	N	N
XP_005636142	LOC100856418; RIMBP2	RIMS-binding protein 2 isoform X1 [Canis lupus familiaris]	1	1	1	163	6.02	-	-	0	-	-	0	ID only	ID only	1	ID only	ID only	1	-	-	0	ID only	289000	0.5	2	N	N	N	N
XP_022276133	RTCD1; RTCA	RNA 3'-terminal phosphate cyclase isoform X1 [Canis lupus familiaris]	4	1	1	41.3	9.09	ID only	ID only	1	-	-	0	-	-	0	-	-	0	358000	220000	1.6	-	-	0	2	N	Y	N	N
XP_533035	RBM8A	RNA-binding protein 8A isoform X1 [Canis lupus familiaris]	11	1	1	19.9	5.72	-	-	0	-	-	0	31700	25100	1.3	-	-	0	35100	12700	2.8	-	-	0	2	N	N	N	N
XP_848712	RUVBL1	ruvB-like 1 [Canis lupus familiaris]	9	3	3	50.2	6.42	-	-	0	-	-	0	-	-	0	299000	165000	1.8	-	-	0	338000	152000	2.2	2	N	Y	N	N
XP_533625	RUVBL2	ruvB-like 2 [Canis lupus familiaris]	14	7	7	51.1	5.64	-	-	0	91900	42200	2.2	59100	20700	2.8	947000	480000	2	66200	60000	1.1	189000	102000	1.9	3	Y	Y	N	N
NP_001273996	MAT2A	S-adenosylmethionine synthase [Canis lupus familiaris]	9	3	3	43.6	6.48	365000	52500	6.9	-	-	0	1110000	540000	2	-	-	0	1610000	1020000	1.6	-	-	0	3	Y	Y	N	N
XP_005633938	ESD	S-formylglutathione hydrolase [Canis lupus familiaris]	12	15	15	31.4	6.83	18500000	6910000	2.7	-	-	0	44800000	29100000	1.5	479000	177000	2.7	83600000	53200000	1.6	774000	423000	1.8	3	N	Y	N	Y
XP_013973265	MTAP	S-methyl-5'-thioadenosine phosphorylase isoform X1 [Canis lupus familiaris]	23	8	8	35.1	7.66	273000	94700	2.9	-	-	0	11500000	6420000	1.8	-	-	0	12700000	6680000	1.9	-	-	0	3	N	Y	N	N
NP_001239337	SKP1	S-phase kinase-associated protein 1 [Canis lupus familiaris]	28	3	3	18.6	4.54	-	-	0	-	-	0	426000	253000	1.7	-	-	0	720000	277000	2.6	-	-	0	2	N	Y	N	N
XP_022262242	SLMAP	sarcolemmal membrane-associated protein isoform X1 [Canis lupus familiaris]	1	1	1	99.1	5.39	-	-	0	-	-	0	-	-	0	-	-	0	-	-	0	ID only	ID only	1	1	N	Y	N	N
NP_001003214	ATP2A2	sarcoplasmic/endoplasmic reticulum calcium ATPase 2 [Canis lupus familiaris]	15	13	8	109.6	5.36	-	-	0	16400	9010	1.8	-	-	0	447000	294000	1.5	-	-	0	2410000	1400000	1.7	3	N	Y	N	N
XP_022279203	ATP2A3	sarcoplasmic/endoplasmic reticulum calcium ATPase 3 isoform X4 [Canis lupus familiaris]	32	26	21	113.3	5.62	-	-	0	1990000	994000	2	-	-	0	7400000	5070000	1.5	-	-	0	19600000	12700000	1.5	3	N	Y	N	N
XP_548166	SCRN2	secernin-2 [Canis lupus familiaris]	38	11	11	46.6	5.81	5270000	927000	5.7	-	-	0	10300000	5430000	1.9	-	-	0	10300000	6920000	1.5	-	-	0	3	N	Y	N	N
XP_545529	SCRN3	secernin-3 [Canis lupus familiaris]	3	1	1	48.2	5.76	-	-	0	-	-	0	-	-	0	-	-	0	69500	57700	1.2	-	-	0	1	N	Y	N	N
XP_005635938	SPP2	secreted phosphoprotein 24 [Canis lupus familiaris]	6	1	1	22.7	7.18	-	-	0	-	-	0	ID only	ID only	1	-	-	0	441000	ID only	10	ID only	ID only	1	2	N	Y	N	N
XP_859726	SCAMP1	secretory carrier-associated membrane protein 1 isoform X1 [Canis lupus familiaris]	14	2	2	37.9	7.42	-	-	0	-	-	0	-	-	0	262000	171000	1.5	-	-	0	131000	102000	1.3	2	N	Y	N	N
XP_005638688	SCAMP2	secretory carrier-associated membrane protein 2 isoform X1 [Canis lupus familiaris]	9	3	3	41.8	7.62	-	-	0	201000	206000	1	-	-	0	1070000	346000	3.1	-	-	0	1930000	681000	2.8	3	Y	Y	N	N
XP_851948	SCAMP3	secretory carrier-associated membrane protein 3 isoform X1 [Canis lupus familiaris]	16	4	4	38.2	7.21	-	-	0	ID only	39800	0.5	-	-	0	327000	252000	1.3	-	-	0	368000	392000	0.9	3	N	Y	N	N
XP_548339	SHPK	sedoheptulokinase isoform X1 [Canis lupus familiaris]	39	10	10	50.7	6.23	1660000	544000	3.1	-	-	0	7730000	4130000	1.9	-	-	0	11500000	8690000	1.3	-	-	0	3	N	Y	N	N
XP_005630863	SELENBP1	selenium-binding protein 1 [Canis lupus familiaris]	12	5	5	52.3	6.21	1010000	287000	3.5	-	-	0	3430000	1350000	2.5	-	-	0	2290000	1340000	1.7	-	-	0	3	Y	N	N	N
NP_001108590	SEPP1; SELENOP	selenoprotein P precursor [Canis lupus familiaris]	8	1	1	45.3	7.18	1480000	4210	351.8	-	-	0	2140000	403000	5.3	400000	28600	14	2650000	430000	6.2	351000	53200	6.6	3	Y	Y	N	N
XP_022272646	SEMA4B	semaphorin-4B [Canis lupus familiaris]	1	1	1	92.3	7.72	32100	13800	2.3	-	-	0	-	-	0	-	-	0	-	-	0	-	-	0	1	N	N	N	N
XP_013972969	SEMA4C	semaphorin-4C [Canis lupus familiaris]	2	1	1	92.4	7.36	-	-	0	-	-	0	ID only	ID only	1	ID only	ID only	1	399000	ID only	10	-	-	0	2	N	N	N	N
XP_540234	SPR	sepiapterin reductase [Canis lupus familiaris]	15	4	4	28.6	5.52	-	-	0	-	-	0	1560000	444000	3.5	ID only	ID only	1	520000	303000	1.7	-	-	0	2	N	Y	N	N
XP_022269346	SEP11	septin-11 isoform X1 [Canis lupus familiaris]	20	7	2	49.6	6.55	ID only	ID only	1	14600	3500	4.2	189000	62300	3	276000	99400	2.8	289000	174000	1.7	224000	85600	2.6	3	Y	Y	N	N
XP_851909	SEPT2	septin-2 [Canis lupus familiaris]	44	11	11	41.5	6.65	3360000	586000	5.7	1410000	380000	3.7	5760000	2030000	2.8	8300000	4220000	2	16900000	11100000	1.5	9130000	4580000	2	3	Y	Y	N	N
XP_005641798	SEPT6	septin-6 isoform X1 [Canis lupus familiaris]	39	16	11	49.5	6.67	11100000	3190000	3.5	4570000	1540000	3	9950000	2690000	3.7	9770000	4690000	2.1	33300000	20400000	1.6	18600000	7980000	2.3	3	Y	Y	N	N
XP_022283282	SEPT7	septin-7 isoform X1 [Canis lupus familiaris]	28	16	15	49.4	8.73	4920000	1280000	3.9	1430000	523000	2.7	1940000	502000	3.9	7770000	3660000	2.1	9460000	5810000	1.6	5350000	2890000	1.8	3	Y	Y	Y	N
XP_013973187	SEPT8	septin-8 isoform X6 [Canis lupus familiaris]	3	1	1	55.9	6.33	-	-	0	-	-	0	-	-	0	-	-	0	-	-	0	134000	33100	4	1	N	N	N	N
XP_022279604	SEPT9	septin-9 [Canis lupus familiaris]	5	2	2	76.9	8.9	673000	38500	17.5	12900	27300	0.5	248000	71800	3.5	164000	99600	1.6	570000	232000	2.5	245000	104000	2.3	3	Y	Y	N	N
XP_022280799	SQSTM1	sequestosome-1 isoform X3 [Canis lupus familiaris]	6	1	1	47.9	4.91	-	-	0	-	-	0	-	-	0	370000	174000	2.1	-	-	0	-	-	0	1	N	Y	N	N
XP_851767	SRGN	serglycin [Canis lupus familiaris]	13	2	2	17.3	4.34	2520000	298000	8.5	-	-	0	16500000	4160000	4	340000	129000	2.6	18600000	3360000	5.5	344000	ID only	10	3	Y	Y	Y	N
XP_005620199	SHMT1	serine hydroxymethyltransferase, cytosolic [Canis lupus familiaris]	10	14	14	53.4	7.37	7330000	835000	8.8	54600	21500	2.5	10700000	4390000	2.4	624000	71100	8.8	11500000	7820000	1.5	404000	164000	2.5	3	Y	Y	N	N
XP_849244	SHMT2	serine hydroxymethyltransferase, mitochondrial [Canis lupus familiaris]	2	1	1	56.2	8.47	-	-	0	ID only	ID only	1	-	-	0	-	-	0	-	-	0	-	-	0	1	N	Y	N	N
XP_541308	SPTLC1	serine palmitoyltransferase 1 isoform X1 [Canis lupus familiaris]	3	1	1	52.8	7.06	-	-	0	-	-	0	-	-	0	2580000	27400	94.4	-	-	0	2180000	ID only	10	2	Y	Y	N	N
XP_542217	PRSS57	serine protease 57 [Canis lupus familiaris]	25	9	9	51.3	8.73	9450000	654000	14.5	13900000	242000	57.2	28900000	3200000	9	27000000	1370000	19.8	59300000	8330000	7.1	31500000	2180000	14.4	3	Y	N	N	N
XP_543790	STRAP	serine-threonine kinase receptor-associated protein isoform X1 [Canis lupus familiaris]	5	9	9	38.5	5.12	1420000	666000	2.1	-	-	0	3980000	2900000	1.4	ID only	ID only	1	9430000	4440000	2.1	ID only	ID only	1	3	Y	Y	N	N
XP_022263812	STK24	serine/threonine-protein kinase 24 [Canis lupus familiaris]	7	6	3	49.5	5.71	1070000	96600	11	24000	10500	2.3	253000	301000	0.8	ID only	171000	0.5	2890000	1150000	2.5	97000	39700	2.4	3	Y	Y	N	N
XP_549261	MST4; STK26	serine/threonine-protein kinase 26 isoform X1 [Canis lupus familiaris]	10	5	2	46.5	5.29	1790000	191000	9.4	149000	94700	1.6	844000	167000	5.1	231000	79500	2.9	1230000	519000	2.4	388000	179000	2.2	3	Y	Y	N	N
XP_532280	STK3	serine/threonine-protein kinase 3 isoform X1 [Canis lupus familiaris]	3	1	1	56.2	5.24	-	-	0	-	-	0	ID only	ID only	1	-	-	0	-	-	0	ID only	ID only	1	2	N	Y	N	N
XP_538887	STK38	serine/threonine-protein kinase 38 isoform X1 [Canis lupus familiaris]	2	1	1	54.1	7.17	-	-	0	ID only	6600	0.5	-	-	0	114000	ID only	10	51400	98500	0.5	152000	8450	18	3	Y	Y	N	N
XP_534432	STK4	serine/threonine-protein kinase 4 isoform X1 [Canis lupus familiaris]	6	2	2	55.5	5.11	-	-	0	-	-	0	-	-	0	ID only	ID only	1	ID only	ID only	1	-	-	0	2	N	Y	N	N
XP_005623889	CDC42BPB	serine/threonine-protein kinase MRCK beta isoform X1 [Canis lupus familiaris]	9	10	10	195.9	6.4	105000	10400	10.2	77100	55900	1.4	ID only	ID only	1	1290000	925000	1.4	58400	40400	1.4	2440000	1130000	2.2	3	N	Y	N	N
XP_022279561	NEK6	serine/threonine-protein kinase Nek6 [Canis lupus familiaris]	7	1	1	35.7	8.07	-	-	0	-	-	0	-	-	0	-	-	0	-	-	0	ID only	ID only	1	1	N	N	N	N
XP_849432	PAK2	serine/threonine-protein kinase PAK 2 isoform X1 [Canis lupus familiaris]	10	5	5	57.9	5.77	ID only	ID only	1	-	-	0	528000	149000	3.6	159000	138000	1.2	694000	419000	1.7	144000	209000	0.7	3	N	Y	N	N
XP_022266372	TAOK3	serine/threonine-protein kinase TAO3 isoform X1 [Canis lupus familiaris]	8	6	6	105.4	7.14	ID only	ID only	1	58100	45800	1.3	944000	317000	3	827000	398000	2.1	2520000	1500000	1.7	2120000	1370000	1.5	3	N	Y	N	N
XP_003433530	WNK1	serine/threonine-protein kinase WNK1 isoform X22 [Canis lupus familiaris]	1	2	2	279.6	6.23	-	-	0	-	-	0	-	-	0	-	-	0	81400	51400	1.6	-	-	0	1	N	Y	N	N
XP_548082	WNK4	serine/threonine-protein kinase WNK4 [Canis lupus familiaris]	3	1	1	113.5	5.9	-	-	0	-	-	0	116000	ID only	10	ID only	ID only	1	ID only	ID only	1	ID only	ID only	1	2	N	N	N	N
XP_013963009	PPP2R2A	serine/threonine-protein phosphatase 2A 55 kDa regulatory subunit B alpha isoform isoform X1 [Canis lupus familiaris]	6	3	3	51.7	6.2	637000	65500	9.7	-	-	0	130000	38000	3.4	-	-	0	573000	414000	1.4	-	-	0	3	Y	Y	N	N
XP_005627426	PPP2R5D	serine/threonine-protein phosphatase 2A 56 kDa regulatory subunit delta isoform [Canis lupus familiaris]	2	1	1	70.1	8.18	-	-	0	-	-	0	ID only	ID only	1	-	-	0	-	-	0	-	-	0	1	N	Y	N	N
XP_537472	PPP2R5E	serine/threonine-protein phosphatase 2A 56 kDa regulatory subunit epsilon isoform isoform X1 [Canis lupus familiaris]	3	1	1	54.7	6.95	-	-	0	-	-	0	-	-	0	-	-	0	ID only	ID only	1	-	-	0	1	N	Y	N	N
XP_005616279	PPP2R1A; LOC484335	serine/threonine-protein phosphatase 2A 65 kDa regulatory subunit A alpha isoform isoform X1 [Canis lupus familiaris]	2	10	10	65.4	5.15	1250000	783000	1.6	47500	12600	3.8	-	-	0	359000	164000	2.2	-	-	0	282000	223000	1.3	3	Y	Y	N	N
XP_850993	PPP2R1A; LOC484335	serine/threonine-protein phosphatase 2A 65 kDa regulatory subunit A alpha isoform isoform X2 [Canis lupus familiaris]	38	17	17	65.3	5.11	-	-	0	-	-	0	13000000	7430000	1.8	-	-	0	15700000	11100000	1.4	-	-	0	2	N	Y	N	N
XP_013968898	PPP2R1B	serine/threonine-protein phosphatase 2A 65 kDa regulatory subunit A beta isoform isoform X1 [Canis lupus familiaris]	11	6	2	77.7	5.53	-	-	0	-	-	0	-	-	0	-	-	0	ID only	ID only	1	-	-	0	1	N	N	N	N
XP_548424	PPP2R4; PTPA	serine/threonine-protein phosphatase 2A activator isoform X1 [Canis lupus familiaris]	56	10	10	36.8	6.19	1590000	886000	1.8	-	-	0	15500000	8890000	1.7	-	-	0	26300000	11500000	2.3	-	-	0	3	N	Y	N	N
NP_001003063	PPP2CA	serine/threonine-protein phosphatase 2A catalytic subunit alpha isoform [Canis lupus familiaris]	27	5	4	35.6	5.54	752000	161000	4.7	ID only	ID only	1	-	-	0	-	-	0	4510000	1720000	2.6	-	-	0	2	Y	Y	N	N
XP_539988	PPP2CB	serine/threonine-protein phosphatase 2A catalytic subunit beta isoform [Canis lupus familiaris]	27	5	4	35.6	5.43	-	-	0	-	-	0	2770000	1710000	1.6	-	-	0	ID only	ID only	1	-	-	0	2	N	Y	N	N
NP_001184025	PPP3CA	serine/threonine-protein phosphatase 2B catalytic subunit alpha isoform [Canis lupus familiaris]	7	2	2	58.7	5.86	159000	16200	9.8	ID only	ID only	1	113000	39100	2.9	-	-	0	ID only	ID only	1	35300	63400	0.6	3	Y	Y	N	N
XP_022260894	PPP5C	serine/threonine-protein phosphatase 5 [Canis lupus familiaris]	13	4	4	54	7.01	557000	53700	10.4	-	-	0	1480000	669000	2.2	-	-	0	1280000	837000	1.5	-	-	0	3	Y	Y	N	N
XP_851294	PPP6C	serine/threonine-protein phosphatase 6 catalytic subunit isoform X1 [Canis lupus familiaris]	9	2	2	35.1	5.69	-	-	0	-	-	0	507000	251000	2	-	-	0	3490000	1610000	2.2	-	-	0	2	Y	Y	N	N
XP_022279960	PPP6R2	serine/threonine-protein phosphatase 6 regulatory subunit 2 [Canis lupus familiaris]	3	2	2	104.1	4.79	-	-	0	-	-	0	107000	ID only	10	-	-	0	ID only	ID only	1	-	-	0	2	N	Y	N	N
XP_022261276	PPP6R3	serine/threonine-protein phosphatase 6 regulatory subunit 3 isoform X1 [Canis lupus familiaris]	2	1	1	98.7	4.63	-	-	0	-	-	0	-	-	0	-	-	0	266000	159000	1.7	-	-	0	1	N	Y	N	N
XP_536969	CPPED1	serine/threonine-protein phosphatase CPPED1 [Canis lupus familiaris]	24	5	5	35	5.96	ID only	ID only	1	-	-	0	2180000	1390000	1.6	-	-	0	3860000	2190000	1.8	-	-	0	3	N	Y	N	N
XP_543346	PGAM5	serine/threonine-protein phosphatase PGAM5, mitochondrial isoform X1 [Canis lupus familiaris]	4	1	1	32	8.56	-	-	0	-	-	0	-	-	0	52300	29800	1.8	-	-	0	54200	37800	1.4	2	N	Y	N	N
NP_001003064	PPP1CA	serine/threonine-protein phosphatase PP1-alpha catalytic subunit [Canis lupus familiaris]	38	11	6	37.5	6.33	780000	597000	1.3	-	-	0	6000000	3390000	1.8	-	-	0	12900000	6400000	2	-	-	0	3	N	Y	N	N
NP_001003034	PPP1CB	serine/threonine-protein phosphatase PP1-beta catalytic subunit [Canis lupus familiaris]	27	9	3	37.2	5.97	-	-	0	-	-	0	148000	61300	2.4	2260000	876000	2.6	160000	126000	1.3	3310000	1430000	2.3	2	Y	Y	N	N
XP_005636058	PPP1CC	serine/threonine-protein phosphatase PP1-gamma catalytic subunit isoform X1 [Canis lupus familiaris]	20	10	1	38.5	6.13	-	-	0	228000	32000	7.1	ID only	101000	0.5	98100	47800	2.1	274000	122000	2.2	113000	59200	1.9	3	Y	Y	N	N
XP_534268	TF; LOC477072	serotransferrin [Canis lupus familiaris]	12	58	57	78.1	7.53	25300000	7940000	3.2	-	-	0	321000000	76100000	4.2	1160000	227000	5.1	467000000	127000000	3.7	2950000	841000	3.5	3	Y	Y	Y	Y
XP_005634506	LOC477071; TF	serotransferrin isoform X1 [Canis lupus familiaris]	2	27	26	77.2	6.64	647000	101000	6.4	-	-	0	43500000	6650000	6.5	ID only	ID only	1	64900000	11500000	5.7	ID only	ID only	1	3	Y	Y	N	Y
XP_013971614	SERPINA12; LOC612386	serpin A12 isoform X1 [Canis lupus familiaris]	2	1	1	48.4	9.32	-	-	0	-	-	0	2480000	2370000	0.1	-	-	0	-	-	0	-	-	0	1	N	N	N	N
XP_541071	SERPINB10	serpin B10 [Canis lupus familiaris]	11	3	3	44.9	6.07	-	-	0	-	-	0	901000	387000	2.3	-	-	0	-	-	0	-	-	0	1	N	N	N	N
XP_022270433	SERPINB13	serpin B13 [Canis lupus familiaris]	3	1	1	49.4	6	-	-	0	-	-	0	216000	ID only	10	-	-	0	-	-	0	-	-	0	1	N	N	N	N
XP_005640036	SERPINB9	serpin B9 isoform X1 [Canis lupus familiaris]	25	10	9	48.2	6	67300	30700	2.2	-	-	0	3520000	2010000	1.7	-	-	0	10300000	6250000	1.7	-	-	0	3	N	Y	N	N
NP_001159360	SERPINH1	serpin H1 precursor [Canis lupus familiaris]	7	2	2	46.6	8.75	325000	37700	8.6	17600	32900	0.5	-	-	0	-	-	0	-	-	0	-	-	0	1	N	Y	N	N
XP_005628024	ALB	serum albumin isoform X1 [Canis lupus familiaris]	62	68	3	68.6	5.69	-	-	0	-	-	0	78700000	20600000	3.8	663000	257000	2.6	167000000	53700000	3.1	64100000	24200000	2.6	2	Y	Y	Y	Y
NP_001003026	ALB	serum albumin precursor [Canis lupus familiaris]	62	69	30	68.6	5.69	224000000	89500000	2.5	2920000	305000	9.6	1900000000	527000000	3.6	37500000	13500000	2.8	3860000000	1180000000	3.3	1340000	460000	2.9	3	Y	Y	N	Y
XP_005627830	SH3BGRL2; LOC474977	SH3 domain-binding glutamic acid-rich-like protein 2 [Canis lupus familiaris]	28	9	9	32	10.43	25100000	5130000	4.9	-	-	0	32900000	14200000	2.3	-	-	0	48000000	26900000	1.8	-	-	0	3	Y	Y	N	N
XP_854998	SH3BGRL3	SH3 domain-binding glutamic acid-rich-like protein 3 [Canis lupus familiaris]	56	2	2	10.4	4.93	4010000	430000	9.3	-	-	0	501000	471000	1.1	-	-	0	12400000	8240000	1.5	-	-	0	3	N	Y	Y	Y
XP_005641587	SH3BGRL	SH3 domain-binding glutamic acid-rich-like protein isoform X2 [Canis lupus familiaris]	64	5	5	12.8	5.25	1210000	376000	3.2	-	-	0	1330000	971000	1.4	-	-	0	3250000	1850000	1.8	-	-	0	3	N	Y	N	N
XP_005641226	SH3KBP1	SH3 domain-containing kinase-binding protein 1 isoform X6 [Canis lupus familiaris]	2	3	3	78	7.58	701000	155000	4.5	ID only	5270	0.5	ID only	ID only	1	58400	47000	1.2	986000	527000	1.9	108000	57400	1.9	3	N	Y	N	N
XP_022274414	LOC100856415; SGIP1	SH3-containing GRB2-like protein 3-interacting protein 1 isoform X1 [Canis lupus familiaris]	2	1	1	92.2	8.16	-	-	0	-	-	0	-	-	0	-	-	0	-	-	0	ID only	ID only	1	1	N	N	N	N
XP_547561	SHC1	SHC-transforming protein 1 [Canis lupus familiaris]	6	1	1	62.2	6.49	ID only	ID only	1	-	-	0	-	-	0	-	-	0	-	-	0	-	-	0	1	N	Y	N	N
XP_546553	TRPC6	short transient receptor potential channel 6 [Canis lupus familiaris]	9	5	5	106.3	7.01	-	-	0	ID only	ID only	1	-	-	0	682000	319000	2.1	-	-	0	654000	401000	1.6	3	N	Y	N	N
XP_005636365	ACADS	short-chain specific acyl-CoA dehydrogenase, mitochondrial, partial [Canis lupus familiaris]	3	2	2	43.9	8.05	ID only	ID only	1	99300	31200	3.2	254000	199000	1.3	199000	93200	2.1	300000	299000	1	185000	128000	1.4	3	Y	Y	N	N
XP_858869	SIAE	sialate O-acetylesterase isoform X1 [Canis lupus familiaris]	2	6	6	57.1	6.74	68600	6420	10.7	-	-	0	937000	65200	14.4	-	-	0	3790000	79100	47.9	ID only	ID only	1	3	Y	Y	Y	N
XP_538746	NANS	sialic acid synthase [Canis lupus familiaris]	13	8	8	40.2	6.9	1870000	715000	2.6	ID only	ID only	1	10800000	4960000	2.2	-	-	0	14100000	10800000	1.3	858000	376000	2.3	3	Y	Y	N	N
XP_022273391	SFXN1	sideroflexin-1 isoform X1 [Canis lupus familiaris]	7	2	2	38.7	9.01	-	-	0	-	-	0	-	-	0	ID only	ID only	1	-	-	0	79300	37200	2.1	2	N	Y	N	N
NP_001003312	SEC11C	signal peptidase complex catalytic subunit SEC11C [Canis lupus familiaris]	6	1	1	21.6	9.23	-	-	0	-	-	0	-	-	0	-	-	0	-	-	0	106000	ID only	10	1	N	N	N	N
XP_005634507	SRPRB	signal recognition particle receptor subunit beta [Canis lupus familiaris]	12	2	2	29.8	9.44	-	-	0	ID only	ID only	1	-	-	0	108000	62100	1.7	-	-	0	143000	78600	1.8	3	N	Y	N	N
XP_848353	STAT1; LOC488449	signal transducer and activator of transcription 1-alpha/beta [Canis lupus familiaris]	2	2	2	87.2	6.13	-	-	0	-	-	0	ID only	ID only	1	-	-	0	265000	91300	2.9	ID only	ID only	1	2	N	Y	N	N
XP_022278689	STAT3	signal transducer and activator of transcription 3 isoform X1 [Canis lupus familiaris]	3	3	3	88	6.3	640000	253000	2.5	284000	44600	6.4	272000	57600	4.7	76100	79900	1	630000	259000	2.4	357000	201000	1.8	3	Y	Y	N	N
XP_548091	STAT5A	signal transducer and activator of transcription 5A isoform X1 [Canis lupus familiaris]	2	1	1	90.6	6.25	-	-	0	10000	6970	1.4	ID only	ID only	1	-	-	0	-	-	0	-	-	0	2	N	Y	N	N
XP_013972034	STAT5B; LOC490969	signal transducer and activator of transcription 5B isoform X1 [Canis lupus familiaris]	6	3	3	90.1	6.05	-	-	0	-	-	0	-	-	0	ID only	ID only	1	512000	303000	1.7	191000	165000	1.2	2	N	Y	N	N
XP_022279679	STAT6	signal transducer and activator of transcription 6 isoform X1 [Canis lupus familiaris]	2	1	1	94	6.38	-	-	0	-	-	0	-	-	0	ID only	ID only	1	-	-	0	-	-	0	1	N	Y	N	N
XP_005628306	STAP1	signal-transducing adaptor protein 1 isoform X2 [Canis lupus familiaris]	6	1	1	34.1	8.6	-	-	0	-	-	0	-	-	0	-	-	0	339000	85900	3.9	-	-	0	1	N	N	N	N
XP_022271682	PDS5A	sister chromatid cohesion protein PDS5 homolog A isoform X1 [Canis lupus familiaris]	1	1	1	154	7.64	-	-	0	-	-	0	855000	344000	2.5	-	-	0	-	-	0	-	-	0	1	N	N	N	N
XP_005640941	CD84	SLAM family member 5 isoform X1 [Canis lupus familiaris]	5	2	2	37.7	6.77	680000	37900	18	-	-	0	1240000	355000	3.5	-	-	0	2260000	614000	3.7	-	-	0	3	Y	Y	Y	N
XP_022261958	SGTA	small glutamine-rich tetratricopeptide repeat-containing protein alpha isoform X1 [Canis lupus familiaris]	11	3	3	34.2	5.01	-	-	0	-	-	0	289000	182000	1.6	-	-	0	553000	313000	1.8	-	-	0	2	N	Y	N	N
XP_022268928	LOC100856530; SUMO3	small ubiquitin-related modifier 3 isoform X1 [Canis lupus familiaris]	9	1	1	15.3	6.29	-	-	0	-	-	0	116000	82700	1.4	-	-	0	-	-	0	-	-	0	1	N	Y	N	N
NP_001104241	SLC6A4	sodium-dependent serotonin transporter [Canis lupus familiaris]	3	1	1	70.3	6.01	-	-	0	-	-	0	-	-	0	285000	184000	1.5	-	-	0	420000	278000	1.5	2	N	Y	N	N
NP_001003306	ATP1A1	sodium/potassium-transporting ATPase subunit alpha-1 precursor [Canis lupus familiaris]	7	4	3	112.6	5.86	-	-	0	57000	39900	1.4	-	-	0	234000	116000	2	-	-	0	433000	219000	2	3	Y	Y	N	N
XP_005616573	ATP1A3	sodium/potassium-transporting ATPase subunit alpha-3 isoform X1 [Canis lupus familiaris]	6	4	3	113	5.41	-	-	0	43000	41300	1	-	-	0	756000	500000	1.5	-	-	0	920000	383000	2.4	3	N	N	N	N
XP_005634705	ATP1B3	sodium/potassium-transporting ATPase subunit beta-3, partial [Canis lupus familiaris]	5	1	1	29.6	7.94	-	-	0	-	-	0	-	-	0	-	-	0	-	-	0	ID only	ID only	1	1	N	Y	N	N
XP_005616170	SSC5D	soluble scavenger receptor cysteine-rich domain-containing protein SSC5D [Canis lupus familiaris]	3	5	5	162.5	6.58	76700	18100	4.2	ID only	ID only	1	584000	113000	5.2	127000	55200	2.3	2010000	381000	5.3	50200	29400	1.7	3	Y	N	N	N
NP_001003308	SLC2A3	solute carrier family 2, facilitated glucose transporter member 3 precursor [Canis lupus familiaris]	13	5	5	54.2	5.62	-	-	0	161000	68300	2.4	-	-	0	518000	420000	1.2	-	-	0	3510000	1850000	1.9	3	N	Y	N	N
XP_544659	SORD	sorbitol dehydrogenase [Canis lupus familiaris]	7	1	1	38.1	7.42	-	-	0	-	-	0	614000	310000	2	-	-	0	530000	271000	2	-	-	0	2	Y	Y	N	Y
XP_005628534	SRI	sorcin isoform X1 [Canis lupus familiaris]	8	3	3	31.3	9.19	-	-	0	31200	25300	1.2	66500	27200	2.4	97300	17800	5.5	777000	348000	2.2	433000	78000	5.6	3	Y	Y	N	N
XP_022276065	SORT1	sortilin isoform X1 [Canis lupus familiaris]	2	2	2	93.7	6.19	-	-	0	-	-	0	417000	91900	4.5	-	-	0	ID only	ID only	1	-	-	0	2	N	Y	N	N
XP_022268566	SNX1	sorting nexin-1 isoform X1 [Canis lupus familiaris]	3	2	2	63.9	5.5	-	-	0	-	-	0	-	-	0	66600	51600	1.3	815000	575000	1.4	ID only	ID only	1	2	N	Y	N	N
XP_003640265	LOC100855626; SNX12	sorting nexin-12 [Canis lupus familiaris]	18	2	2	18.9	8.44	-	-	0	-	-	0	201000	68400	2.9	-	-	0	691000	86800	8	-	-	0	2	Y	Y	N	N
XP_022280917	SNX2	sorting nexin-2 isoform X1 [Canis lupus familiaris]	3	1	1	46.6	6.58	-	-	0	-	-	0	361000	181000	2	-	-	0	562000	309000	1.8	-	-	0	2	N	Y	N	N
XP_022260709	SNX27	sorting nexin-27 isoform X1 [Canis lupus familiaris]	4	2	2	63.3	6.18	-	-	0	-	-	0	-	-	0	-	-	0	579000	527000	1.1	-	-	0	1	N	Y	N	N
XP_535771	SNX4	sorting nexin-4 [Canis lupus familiaris]	3	1	1	47.2	6.67	ID only	ID only	1	ID only	ID only	1	-	-	0	ID only	ID only	1	-	-	0	-	-	0	2	N	Y	N	N
XP_547770	SNX6	sorting nexin-6 isoform X1 [Canis lupus familiaris]	11	2	2	46.6	6.16	ID only	ID only	1	-	-	0	ID only	ID only	1	-	-	0	546000	105000	5.2	ID only	ID only	1	3	N	Y	N	N
XP_005615596	SNX9	sorting nexin-9 isoform X1 [Canis lupus familiaris]	8	4	4	69	5.4	252000	33000	7.6	16700	11300	1.5	1350000	591000	2.3	244000	224000	1.1	3550000	2160000	1.6	374000	326000	1.1	3	Y	Y	N	N
XP_022271035	SPTA1	spectrin alpha chain, erythrocytic 1 [Canis lupus familiaris]	10	37	37	272.2	5	-	-	0	152000	44600	3.4	-	-	0	13100000	8300000	1.6	-	-	0	3540000	2500000	1.4	3	N	Y	N	N
XP_013972487	SPTAN1	spectrin alpha chain, non-erythrocytic 1 isoform X1 [Canis lupus familiaris]	34	57	57	288.9	5.41	451000	589000	0.8	34200	18900	1.8	8870000	5250000	1.7	17200000	12400000	1.4	26600000	19400000	1.4	22600000	13000000	1.7	3	N	Y	N	N
XP_005625339	SPTAN1	spectrin alpha chain, non-erythrocytic 1 isoform X2 [Canis lupus familiaris]	12	22	1	288.4	5.4	-	-	0	994000	480000	2.1	-	-	0	-	-	0	-	-	0	-	-	0	1	N	Y	N	N
XP_022277476	SPTB	spectrin beta chain, erythrocytic isoform X1 [Canis lupus familiaris]	14	36	35	267.6	5.31	-	-	0	265000	94900	2.8	76900	42300	1.8	16900000	9000000	1.9	317000	261000	1.2	4600000	2240000	2.1	3	Y	Y	N	N
XP_022280457	SPTBN1	spectrin beta chain, non-erythrocytic 1 isoform X1 [Canis lupus familiaris]	19	28	26	274.3	5.55	314000	236000	1.3	1860000	512000	3.6	2400000	1150000	2.1	6280000	5500000	1.1	5400000	3720000	1.5	9630000	5180000	1.9	3	N	Y	N	N
XP_537743	SPAG5	sperm-associated antigen 5 isoform X1 [Canis lupus familiaris]	1	1	1	134	4.86	-	-	0	-	-	0	-	-	0	-	-	0	513000	23900	21.5	-	-	0	1	N	N	N	N
XP_539483	SKAP2	src kinase-associated phosphoprotein 2 isoform X1 [Canis lupus familiaris]	9	5	5	41	4.69	1840000	148000	12.5	-	-	0	2000000	363000	5.5	1250000	278000	4.5	7870000	1940000	4.1	1300000	750000	1.7	3	Y	Y	N	N
XP_005630613	STAMBP	STAM-binding protein isoform X1 [Canis lupus familiaris]	3	1	1	48.1	6.09	-	-	0	-	-	0	-	-	0	-	-	0	47500	63000	0.8	-	-	0	1	N	Y	N	N
XP_532436	SND1	staphylococcal nuclease domain-containing protein 1 [Canis lupus familiaris]	21	19	19	101.9	7.17	2060000	1870000	1.1	303000	109000	2.8	9480000	4070000	2.3	3590000	1350000	2.7	16100000	9100000	1.8	2540000	1140000	2.2	3	Y	Y	N	N
XP_005618465	STARD5	stAR-related lipid transfer protein 5 [Canis lupus familiaris]	5	2	2	23.7	6.55	-	-	0	-	-	0	187000	106000	1.8	-	-	0	369000	251000	1.5	-	-	0	2	N	N	N	N
XP_866126	STMN1	stathmin isoform X2 [Canis lupus familiaris]	9	1	1	17.3	5.97	-	-	0	-	-	0	ID only	420000	0.5	-	-	0	-	-	0	-	-	0	1	N	Y	N	N
XP_544006	SLK	STE20-like serine/threonine-protein kinase isoform X1 [Canis lupus familiaris]	6	3	3	143.5	5.07	-	-	0	-	-	0	ID only	ID only	1	-	-	0	-	-	0	66000	57100	1.2	2	N	Y	N	N
XP_022278532	STRADA	STE20-related kinase adapter protein alpha isoform X1 [Canis lupus familiaris]	4	1	1	50.2	7.83	ID only	ID only	1	ID only	ID only	1	-	-	0	-	-	0	-	-	0	-	-	0	1	N	N	N	N
XP_531923	HSPA9	stress-70 protein, mitochondrial [Canis lupus familiaris]	2	6	6	73.6	6.3	ID only	17100	0.5	-	-	0	642000	526000	1.2	ID only	ID only	1	1280000	1130000	1.1	196000	156000	1.3	3	N	Y	N	N
XP_854960	STIP1	stress-induced-phosphoprotein 1 [Canis lupus familiaris]	11	21	21	67.2	8.5	2240000	2210000	1	85800	6190	13.9	15500000	11800000	1.3	646000	299000	2.2	24200000	21000000	1.2	504000	263000	1.9	3	Y	Y	N	N
XP_022260336	STRN	striatin [Canis lupus familiaris]	3	1	1	78.2	5.24	ID only	ID only	1	-	-	0	66100	33300	2	75800	118000	0.6	ID only	ID only	1	-	-	0	3	N	Y	N	N
NP_001121569	CXCL12	stromal cell-derived factor 1 isoform 1 precursor [Canis lupus familiaris]	15	1	1	10.6	10.01	-	-	0	130000	ID only	10	-	-	0	-	-	0	-	-	0	-	-	0	1	N	Y	N	N
XP_537746	SDF2	stromal cell-derived factor 2 [Canis lupus familiaris]	11	1	1	23.1	7.33	-	-	0	-	-	0	-	-	0	ID only	ID only	1	-	-	0	ID only	ID only	1	2	N	Y	N	N
XP_850810	SDF2L1	stromal cell-derived factor 2-like protein 1 [Canis lupus familiaris]	11	1	1	23.6	7.66	-	-	0	-	-	0	-	-	0	ID only	ID only	1	-	-	0	ID only	ID only	1	2	N	Y	N	N
XP_005633633	STIM1	stromal interaction molecule 1 isoform X1 [Canis lupus familiaris]	3	1	1	88.8	6.64	-	-	0	ID only	ID only	1	-	-	0	ID only	ID only	1	-	-	0	ID only	ID only	1	3	N	Y	N	N
XP_013965792	SDHA	succinate dehydrogenase [ubiquinone] flavoprotein subunit, mitochondrial isoform X1 [Canis lupus familiaris]	5	2	2	73.1	7.5	-	-	0	-	-	0	-	-	0	91200	67100	1.4	150000	121000	1.2	279000	192000	1.5	2	N	Y	N	N
XP_532985	SUCLG1	succinate--CoA ligase [ADP/GDP-forming] subunit alpha, mitochondrial [Canis lupus familiaris]	5	2	2	36.1	9.13	ID only	ID only	1	-	-	0	586000	526000	1.1	171000	39900	4.3	415000	274000	1.5	ID only	ID only	1	3	N	Y	N	N
XP_013977083	SUCLG2	succinate--CoA ligase [GDP-forming] subunit beta, mitochondrial isoform X1 [Canis lupus familiaris]	3	3	3	48.9	7.87	138000	25400	5.5	-	-	0	222000	173000	1.3	ID only	ID only	1	764000	568000	1.3	ID only	ID only	1	3	N	Y	N	N
XP_013968267	OXCT1	succinyl-CoA:3-ketoacid coenzyme A transferase 1, mitochondrial [Canis lupus familiaris]	2	4	4	64.7	7.81	448000	55200	8.1	ID only	12300	0.5	763000	1320000	0.6	-	-	0	1750000	2080000	0.8	ID only	ID only	1	3	N	Y	N	N
XP_541796	SUMF1	sulfatase-modifying factor 1 isoform X1 [Canis lupus familiaris]	4	1	1	40.5	6.89	-	-	0	-	-	0	109000	36000	3	-	-	0	-	-	0	-	-	0	1	N	Y	N	N
XP_022275229	SUMF2	sulfatase-modifying factor 2 isoform X1 [Canis lupus familiaris]	4	1	1	37.1	6.57	-	-	0	-	-	0	-	-	0	-	-	0	ID only	ID only	1	-	-	0	1	N	Y	N	N
XP_005638434	SQRDL; SQOR	sulfide:quinone oxidoreductase, mitochondrial isoform X1 [Canis lupus familiaris]	6	3	3	49.9	9.39	-	-	0	ID only	18600	0.5	-	-	0	291000	175000	1.7	-	-	0	493000	238000	2.1	3	N	Y	N	N
XP_022280249	LOC474543; SULT1C2	sulfotransferase 1C2 isoform X2 [Canis lupus familiaris]	5	1	1	34.6	6.46	ID only	ID only	1	ID only	ID only	1	-	-	0	-	-	0	-	-	0	-	-	0	1	N	N	N	N
NP_001003035	SOD1	superoxide dismutase [Cu-Zn] [Canis lupus familiaris]	17	5	5	15.9	6.11	3820000	1620000	2.4	-	-	0	19500000	13500000	1.4	-	-	0	7500000	4660000	1.6	38900	76500	0.5	3	N	Y	Y	N
XP_533463	SOD2	superoxide dismutase [Mn], mitochondrial [Canis lupus familiaris]	17	5	5	24.8	8.25	238000	98000	2.4	12200	18800	0.7	671000	560000	1.2	-	-	0	482000	301000	1.6	-	-	0	3	N	Y	N	N
XP_022280648	SUSD1	sushi domain-containing protein 1 isoform X1 [Canis lupus familiaris]	2	1	1	87	6.09	-	-	0	ID only	ID only	1	-	-	0	-	-	0	-	-	0	-	-	0	1	N	Y	N	N
XP_022272232	LOC608858; YKT6	synaptobrevin homolog YKT6 [Canis lupus familiaris]	7	1	1	23.3	9.77	-	-	0	ID only	34100	0.5	-	-	0	-	-	0	-	-	0	-	-	0	1	N	Y	N	N
XP_005638363	SNAP23	synaptosomal-associated protein 23 [Canis lupus familiaris]	40	7	7	23.4	4.96	-	-	0	218000	95800	2.3	-	-	0	2150000	1170000	1.8	94300	54600	1.7	3410000	1880000	1.8	3	N	Y	N	N
XP_022263263	SYTL2	synaptotagmin-like protein 2 isoform X1 [Canis lupus familiaris]	2	2	2	244.9	6.54	-	-	0	ID only	ID only	1	-	-	0	-	-	0	105000	71500	1.5	-	-	0	2	N	N	N	N
XP_022271364	SYTL4	synaptotagmin-like protein 4 isoform X1 [Canis lupus familiaris]	14	7	7	76.1	8.81	1200000	225000	5.3	178000	106000	1.7	576000	233000	2.5	580000	320000	1.8	1240000	408000	3	2070000	640000	3.2	3	Y	Y	N	N
XP_533896	STX10	syntaxin-10 isoform X1 [Canis lupus familiaris]	11	2	2	28.4	5.01	-	-	0	-	-	0	-	-	0	51800	39100	1.3	-	-	0	54300	46300	1.2	2	N	N	N	N
XP_005615540	STX11	syntaxin-11 isoform X1 [Canis lupus familiaris]	14	4	4	33.6	7.17	-	-	0	-	-	0	-	-	0	837000	381000	2.2	-	-	0	892000	373000	2.4	2	Y	Y	N	N
XP_535342	STX12	syntaxin-12 [Canis lupus familiaris]	12	2	2	31.4	5.44	-	-	0	-	-	0	-	-	0	-	-	0	305000	128000	2.4	-	-	0	1	N	Y	N	N
XP_022266018	STX2	syntaxin-2 isoform X1 [Canis lupus familiaris]	6	1	1	37.8	5.96	-	-	0	-	-	0	-	-	0	-	-	0	-	-	0	ID only	ID only	1	1	N	Y	N	N
XP_547039	STX4	syntaxin-4 [Canis lupus familiaris]	10	2	2	34.3	5.96	-	-	0	ID only	ID only	1	-	-	0	453000	167000	2.7	-	-	0	685000	254000	2.7	3	Y	Y	N	N
XP_022272846	STX7; LOC483987	syntaxin-7 isoform X1 [Canis lupus familiaris]	10	4	4	33.7	6.83	1010000	301000	3.4	165000	51600	3.2	172000	91800	1.9	218000	106000	2.1	1800000	791000	2.3	575000	378000	1.5	3	Y	Y	N	N
NP_001003216	STXBP2	syntaxin-binding protein 2 [Canis lupus familiaris]	30	11	11	66.5	6.84	836000	709000	1.2	2140000	619000	3.4	4060000	1980000	2	5630000	2500000	2.3	8300000	5800000	1.4	9450000	4640000	2	3	Y	Y	N	N
XP_547249	STXBP3	syntaxin-binding protein 3 isoform X1 [Canis lupus familiaris]	3	1	1	67.7	8.03	-	-	0	ID only	ID only	1	-	-	0	-	-	0	-	-	0	-	-	0	1	N	Y	N	N
XP_857475	SDCBP	syntenin-1 isoform X1 [Canis lupus familiaris]	11	1	1	32.4	7.11	-	-	0	-	-	0	-	-	0	-	-	0	-	-	0	ID only	ID only	1	1	N	Y	N	N
XP_013974002	LOC106559612	T-cell-interacting, activating receptor on myeloid cells protein 1-like isoform X1 [Canis lupus familiaris]	6	1	1	39.3	8.35	-	-	0	-	-	0	-	-	0	-	-	0	ID only	ID only	1	-	-	0	1	N	N	N	N
XP_541181	TCP1	T-complex protein 1 subunit alpha isoform X1 [Canis lupus familiaris]	65	25	25	60.2	5.99	ID only	22900	0.5	2800000	1010000	2.8	1810000	1460000	1.2	28900000	18700000	1.5	3550000	5720000	0.6	26200000	16300000	1.6	3	N	Y	N	N
XP_005625672	CCT2	T-complex protein 1 subunit beta isoform X1 [Canis lupus familiaris]	49	22	22	61.6	6.67	646000	318000	2	4760000	1750000	2.7	1270000	908000	1.4	23400000	14500000	1.6	2350000	3520000	0.7	20100000	8430000	2.4	3	Y	Y	N	N
XP_003639378	LOC100855692; CCT4	T-complex protein 1 subunit delta [Canis lupus familiaris]	51	23	22	58	7.83	273000	64200	4.2	3220000	1650000	2	1880000	1390000	1.4	20700000	13800000	1.5	2740000	5060000	0.5	18100000	9700000	1.9	3	N	Y	N	N
XP_013965795	CCT5	T-complex protein 1 subunit epsilon [Canis lupus familiaris]	39	19	18	59.6	5.82	ID only	13500	0.5	2510000	449000	5.6	587000	515000	1.1	9680000	6870000	1.4	1180000	1610000	0.7	6080000	4210000	1.4	3	N	Y	N	N
XP_852889	LOC100856782; CCT7	T-complex protein 1 subunit eta [Canis lupus familiaris]	46	22	22	59.4	7.15	ID only	20300	0.5	1520000	870000	1.7	735000	540000	1.4	16700000	10400000	1.6	1030000	1370000	0.8	11700000	6990000	1.7	3	N	Y	N	N
XP_537245	CCT3	T-complex protein 1 subunit gamma isoform X1 [Canis lupus familiaris]	34	16	16	60.6	6.86	ID only	ID only	1	2640000	1130000	2.3	1750000	1420000	1.2	26300000	14600000	1.8	2610000	4570000	0.6	21600000	11500000	1.9	3	N	Y	N	N
XP_005638858	CCT8	T-complex protein 1 subunit theta isoform X1 [Canis lupus familiaris]	21	15	15	60.4	5.77	439000	855000	0.5	-	-	0	2600000	2040000	1.3	26500000	16400000	1.6	4310000	6500000	0.7	-	-	0	3	N	Y	N	N
XP_535576	CCT8	T-complex protein 1 subunit theta isoform X2 [Canis lupus familiaris]	47	19	19	59.7	5.68	-	-	0	5230000	2270000	2.3	-	-	0	-	-	0	-	-	0	20300000	11800000	1.7	2	N	Y	N	N
XP_022276360	LOC606787; CCT6A	T-complex protein 1 subunit zeta [Canis lupus familiaris]	29	14	8	63.6	7.36	-	-	0	3710000	1110000	3.3	-	-	0	18400000	11500000	1.6	-	-	0	15100000	9050000	1.7	3	N	Y	N	N
XP_548266	CCT6B	T-complex protein 1 subunit zeta-2 isoform X1 [Canis lupus familiaris]	19	7	1	57.8	7.01	-	-	0	310000	133000	2.3	-	-	0	4860000	2810000	1.7	-	-	0	2600000	1790000	1.5	3	N	N	N	N
XP_013970643	LOC480059	T-complex protein 1 subunit zeta-like [Canis lupus familiaris]	16	5	5	57.9	6.71	ID only	36300	0.5	-	-	0	833000	771000	1.1	-	-	0	2080000	3520000	0.6	-	-	0	3	N	Y	N	N
XP_013966756	LOC100855726; LY9	T-lymphocyte surface antigen Ly-9 isoform X1 [Canis lupus familiaris]	3	1	1	72.2	6.64	-	-	0	ID only	ID only	1	-	-	0	-	-	0	-	-	0	103000	35400	2.9	2	N	N	N	N
XP_003639438	LOC100856393; TLN1	talin-1 isoform X2 [Canis lupus familiaris]	66	114	114	269.6	6.14	-	-	0	471000000	142000000	3.3	-	-	0	-	-	0	-	-	0	-	-	0	1	N	Y	Y	Y
XP_022268409	TLN2	talin-2 isoform X1 [Canis lupus familiaris]	4	13	2	271.4	5.57	-	-	0	-	-	0	449000	294000	1.5	520000	469000	1.1	1140000	797000	1.4	ID only	ID only	1	2	N	Y	N	N
NP_001041566	TAPBP	tapasin precursor [Canis lupus familiaris]	2	1	1	47.7	7.15	-	-	0	-	-	0	-	-	0	165000	57000	2.9	-	-	0	222000	97700	2.3	2	Y	Y	N	N
XP_003431555	TOM1	target of Myb protein 1 isoform X1 [Canis lupus familiaris]	4	1	1	53.6	4.89	-	-	0	ID only	8380	0.5	-	-	0	ID only	ID only	1	-	-	0	-	-	0	2	N	Y	N	N
XP_548255	TAF15	TATA-binding protein-associated factor 2N [Canis lupus familiaris]	2	1	1	59.4	8.02	-	-	0	-	-	0	-	-	0	-	-	0	ID only	ID only	1	-	-	0	1	N	Y	N	N
XP_003639313	LOC100856105; TAX1BP3	tax1-binding protein 3 [Canis lupus familiaris]	10	1	1	13.7	8.48	-	-	0	480000	ID only	10	-	-	0	-	-	0	-	-	0	-	-	0	1	N	Y	N	N
XP_537821	TBC1D13	TBC1 domain family member 13 [Canis lupus familiaris]	3	1	1	46.7	5.39	-	-	0	-	-	0	-	-	0	-	-	0	124000	46200	2.7	-	-	0	1	N	Y	N	N
XP_013970162	TBC1D24	TBC1 domain family member 24 isoform X1 [Canis lupus familiaris]	2	1	1	62.8	7.37	-	-	0	-	-	0	ID only	ID only	1	-	-	0	-	-	0	-	-	0	1	N	Y	N	N
XP_022259951	ODZ3; TENM3	teneurin-3 isoform X1 [Canis lupus familiaris]	1	1	1	303.7	6.54	ID only	ID only	1	ID only	ID only	1	884000	819000	1.1	1220000	28900000	0.1	856000	2250000	0.4	520000	298000	1.7	3	N	N	N	N
XP_013977261	CLEC3B	tetranectin [Canis lupus familiaris]	19	2	2	19.3	6.33	-	-	0	-	-	0	-	-	0	ID only	ID only	1	2870000	197000	14.6	52700	ID only	10	2	N	Y	N	N
XP_853199	TSPAN14	tetraspanin-14 [Canis lupus familiaris]	4	1	1	30.6	6.51	-	-	0	-	-	0	-	-	0	-	-	0	-	-	0	134000	55600	2.4	1	N	Y	N	N
XP_022266675	TSPAN9	tetraspanin-9 isoform X3 [Canis lupus familiaris]	10	4	4	34.4	7.46	-	-	0	-	-	0	-	-	0	1440000	565000	2.5	-	-	0	3040000	1590000	1.9	2	N	Y	N	N
XP_005618151	TTC37	tetratricopeptide repeat protein 37 [Canis lupus familiaris]	1	1	1	175.1	7.53	-	-	0	-	-	0	-	-	0	-	-	0	-	-	0	ID only	ID only	1	1	N	Y	N	N
XP_547886	TTC9	tetratricopeptide repeat protein 9A [Canis lupus familiaris]	11	1	1	21.5	8.4	-	-	0	-	-	0	-	-	0	-	-	0	ID only	ID only	1	-	-	0	1	N	N	N	N
XP_022259374	TPK1	thiamin pyrophosphokinase 1 isoform X1 [Canis lupus familiaris]	15	4	4	27.6	7.52	1140000	129000	8.8	-	-	0	913000	574000	1.6	-	-	0	4520000	2180000	2.1	-	-	0	3	Y	N	N	N
XP_859333	THTPA	thiamine-triphosphatase isoform X1 [Canis lupus familiaris]	6	2	2	25.3	4.89	-	-	0	-	-	0	408000	170000	2.4	-	-	0	ID only	ID only	1	-	-	0	2	N	Y	N	N
XP_022262967	THOP1	thimet oligopeptidase isoform X1 [Canis lupus familiaris]	14	7	7	78.4	6.04	688000	502000	1.4	-	-	0	2130000	1380000	1.5	ID only	ID only	1	9030000	6430000	1.4	-	-	0	3	N	Y	N	N
XP_852280	TXNDC12; LOC609843	thioredoxin domain-containing protein 12 isoform X1 [Canis lupus familiaris]	9	1	1	19	5.16	-	-	0	-	-	0	-	-	0	-	-	0	57000	26100	2.2	-	-	0	1	N	Y	N	N
XP_005620372	TXNDC17	thioredoxin domain-containing protein 17 [Canis lupus familiaris]	24	2	2	14.9	7.15	-	-	0	-	-	0	503000	286000	1.8	-	-	0	1080000	362000	3	-	-	0	2	N	Y	N	N
XP_013966048	TXNDC5	thioredoxin domain-containing protein 5 [Canis lupus familiaris]	13	3	3	36.3	5.39	58400	28400	2.1	-	-	0	128000	55900	2.3	-	-	0	241000	238000	1	-	-	0	3	Y	Y	N	N
XP_531785	TXNDC9	thioredoxin domain-containing protein 9 [Canis lupus familiaris]	5	1	1	26.5	6.43	-	-	0	-	-	0	-	-	0	ID only	ID only	1	148000	55900	2.6	105000	70700	1.5	2	N	Y	N	N
NP_001116145	TXNRD1	thioredoxin reductase 1, cytoplasmic [Canis lupus familiaris]	30	13	13	71.5	7.37	812000	365000	2.2	-	-	0	11200000	8160000	1.4	-	-	0	15700000	13300000	1.2	-	-	0	3	N	Y	N	N
NP_001243414	PRDX3	thioredoxin-dependent peroxide reductase, mitochondrial [Canis lupus familiaris]	4	3	3	28.1	8.19	453000	190000	2.4	-	-	0	990000	718000	1.4	381000	237000	1.6	1840000	775000	2.4	290000	172000	1.7	3	Y	Y	N	N
XP_022281407	LOC474798	thioredoxin-like isoform X1 [Canis lupus familiaris]	34	6	6	20.6	6.32	16500000	3670000	4.5	-	-	0	16400000	7510000	2.2	-	-	0	27400000	14000000	2	-	-	0	3	Y	Y	N	N
XP_541090	TXNL1	thioredoxin-like protein 1 [Canis lupus familiaris]	7	9	9	32.3	4.96	3290000	894000	3.7	ID only	ID only	1	5180000	2510000	2.1	-	-	0	9170000	4070000	2.3	ID only	ID only	1	3	Y	Y	N	N
XP_853432	TMX1	thioredoxin-related transmembrane protein 1 [Canis lupus familiaris]	4	1	1	31.5	5.05	-	-	0	-	-	0	-	-	0	58100	54300	1.1	-	-	0	182000	94900	1.9	2	N	Y	N	N
XP_005625965	TST	thiosulfate sulfurtransferase [Canis lupus familiaris]	5	2	2	40.8	9	-	-	0	-	-	0	259000	183000	1.4	-	-	0	366000	284000	1.3	-	-	0	2	N	Y	N	N
XP_536509	TARS	threonine--tRNA ligase, cytoplasmic [Canis lupus familiaris]	19	10	10	83.6	6.92	391000	405000	1	-	-	0	6170000	4370000	1.4	-	-	0	7240000	5770000	1.3	-	-	0	3	N	Y	N	N
XP_544610	THBS1	thrombospondin-1 [Canis lupus familiaris]	58	78	34	129.5	4.98	1990000000	380000000	5.2	1440000000	102000000	14.2	7650000000	1320000000	5.8	3310000000	618000000	5.4	10600000000	2060000000	5.1	3030000000	835000000	3.6	3	Y	Y	Y	Y
NP_001184085	THBS2	thrombospondin-2 precursor [Canis lupus familiaris]	4	4	2	129.4	4.79	-	-	0	ID only	ID only	1	-	-	0	-	-	0	-	-	0	-	-	0	1	N	N	N	Y
XP_005618229	THBS4	thrombospondin-4 [Canis lupus familiaris]	2	1	1	104.1	4.65	-	-	0	-	-	0	193000	ID only	10	-	-	0	194000	ID only	10	-	-	0	2	Y	N	N	N
XP_013975424	TBXAS1	thromboxane-A synthase isoform X1 [Canis lupus familiaris]	39	14	14	60.5	8.07	-	-	0	996000	765000	1.3	-	-	0	5280000	2920000	1.8	-	-	0	15200000	7260000	2.1	3	N	Y	N	N
XP_005624968	LOC100683370; LOC102152706	thymosin beta-4 [Canis lupus familiaris]	43	2	2	5.1	5.06	325000	199000	1.6	-	-	0	74700	31900	2.3	-	-	0	-	-	0	-	-	0	2	N	Y	Y	Y
XP_013969459	TJP2	tight junction protein ZO-2 isoform X1 [Canis lupus familiaris]	15	11	11	141.4	6.93	-	-	0	ID only	30400	0.5	ID only	ID only	1	366000	230000	1.6	203000	25700	7.9	2010000	2520000	0.8	3	N	Y	N	N
XP_537207	TIPRL	TIP41-like protein isoform X1 [Canis lupus familiaris]	8	2	2	31.4	5.64	ID only	ID only	1	-	-	0	ID only	ID only	1	-	-	0	314000	104000	3	-	-	0	3	N	Y	N	N
NP_001003250	FUCA1	tissue alpha-L-fucosidase precursor [Canis lupus familiaris]	15	3	3	53.9	6.67	658000	5480	120.1	-	-	0	200000	ID only	10	766000	224000	3.4	2590000	271000	9.5	-	-	0	3	Y	N	N	N
NP_001003243	TFPI	tissue factor pathway inhibitor [Canis lupus familiaris]	5	2	2	43.9	5.71	291000	10500	27.7	-	-	0	953000	91200	10.5	-	-	0	1500000	163000	9.2	254000	37000	6.9	3	Y	Y	Y	N
XP_013977199	TLR9	toll-like receptor 9 isoform X2 [Canis lupus familiaris]	8	7	7	148.6	8.63	-	-	0	-	-	0	-	-	0	1840000	742000	2.5	-	-	0	2350000	1750000	1.3	2	N	N	N	N
XP_005625116	TOR4A	torsin-4A [Canis lupus familiaris]	5	2	2	46.4	9.25	-	-	0	-	-	0	-	-	0	-	-	0	-	-	0	158000	103000	1.5	1	N	Y	N	N
XP_013965845	TNIK	TRAF2 and NCK-interacting protein kinase isoform X1 [Canis lupus familiaris]	3	3	3	152.1	7.64	-	-	0	-	-	0	-	-	0	185000	35900	5.2	-	-	0	241000	92500	2.6	2	Y	Y	N	N
XP_544914	TRAPPC10	trafficking protein particle complex subunit 10 isoform X1 [Canis lupus familiaris]	2	1	1	141.5	6.48	-	-	0	-	-	0	1220000	1050000	1.2	-	-	0	-	-	0	-	-	0	1	N	Y	N	N
XP_539594	TRAPPC3	trafficking protein particle complex subunit 3 isoform X1 [Canis lupus familiaris]	22	4	4	20.3	4.96	-	-	0	-	-	0	116000	111000	0.1	809000	348000	2.3	955000	432000	2.2	1150000	480000	2.4	2	Y	Y	N	N
XP_537419	TRAPPC6B	trafficking protein particle complex subunit 6B isoform X1 [Canis lupus familiaris]	9	2	2	18	8.68	-	-	0	-	-	0	-	-	0	88800	32700	2.7	-	-	0	ID only	ID only	1	2	N	Y	N	N
NP_001003160	DHDH	trans-1,2-dihydrobenzene-1,2-diol dehydrogenase [Canis lupus familiaris]	12	3	3	36.4	7.44	859000	134000	6.4	-	-	0	492000	314000	1.6	-	-	0	3060000	2000000	1.5	-	-	0	3	N	N	N	N
XP_005630552	TGOLN2; LOC475772	trans-Golgi network integral membrane protein 2 isoform X1 [Canis lupus familiaris]	21	2	2	45.1	5.05	144000	45500	3.2	-	-	0	555000	177000	3.1	-	-	0	1880000	445000	4.2	-	-	0	3	Y	Y	N	N
XP_533146	LOC100855463; TALDO1; LOC475937	transaldolase [Canis lupus familiaris]	35	12	12	37.5	7.17	2120000	425000	5	-	-	0	18600000	13400000	1.4	170000	ID only	10	28500000	22700000	1.3	-	-	0	3	N	Y	Y	N
XP_022266520	TCN2	transcobalamin-2 [Canis lupus familiaris]	3	1	1	48	8.03	-	-	0	-	-	0	-	-	0	95700	ID only	10	-	-	0	115000	ID only	10	2	Y	N	N	N
XP_022281455	SUPT5H	transcription elongation factor SPT5 isoform X1 [Canis lupus familiaris]	2	1	1	121	5.06	ID only	ID only	1	-	-	0	-	-	0	-	-	0	-	-	0	-	-	0	1	N	N	N	N
XP_005617331	PURA	transcriptional activator protein Pur-alpha [Canis lupus familiaris]	17	3	2	34.9	6.44	ID only	ID only	1	-	-	0	758000	279000	2.7	-	-	0	1940000	800000	2.4	-	-	0	3	Y	Y	N	N
XP_013967509	PURB	transcriptional activator protein Pur-beta [Canis lupus familiaris]	11	2	1	32.6	5.54	-	-	0	-	-	0	185000	ID only	10	-	-	0	ID only	ID only	1	-	-	0	2	N	Y	N	N
NP_001003309	TGFB1	transforming growth factor beta-1 precursor [Canis lupus familiaris]	58	19	19	44.2	8.7	53100000	4240000	12.5	36800000	1760000	20.9	102000000	12200000	8.3	76900000	8010000	9.6	103000000	17500000	5.9	56600000	8310000	6.8	3	Y	Y	Y	Y
XP_005621286	TGFB1I1	transforming growth factor beta-1-induced transcript 1 protein isoform X3 [Canis lupus familiaris]	21	5	5	50.1	6.92	-	-	0	-	-	0	-	-	0	ID only	ID only	1	-	-	0	33400	96000	0.3	2	N	Y	N	N
XP_005632367	RHOA	transforming protein RhoA isoform X1 [Canis lupus familiaris]	40	5	5	21.8	6.1	-	-	0	201000	117000	1.7	211000	94900	2.2	4590000	1570000	2.9	559000	214000	2.6	3690000	1490000	2.5	3	Y	Y	N	N
XP_536561	TAGLN	transgelin [Canis lupus familiaris]	52	9	9	22.6	8.81	ID only	ID only	1	-	-	0	4850000	1650000	2.9	-	-	0	9130000	2160000	4.2	-	-	0	3	Y	N	N	N
XP_852741	TAGLN2	transgelin-2 [Canis lupus familiaris]	58	22	22	22.4	8.25	47400000	17400000	2.7	1120000	635000	1.8	139000000	49300000	2.8	10200000	8680000	1.2	226000000	63300000	3.6	12200000	14800000	0.8	3	Y	Y	Y	N
XP_852626	VCP	transitional endoplasmic reticulum ATPase isoform X1 [Canis lupus familiaris]	50	34	34	89.2	5.26	469000	937000	0.5	4430000	1540000	2.9	18600000	14500000	1.3	37600000	21100000	1.8	26600000	33700000	0.8	31400000	19000000	1.7	3	N	Y	Y	Y
XP_005632479	TKT	transketolase [Canis lupus familiaris]	35	31	31	63.1	7.15	104000000	69400000	1.5	2120000	558000	3.8	303000000	211000000	1.4	14200000	6710000	2.1	461000000	347000000	1.3	20200000	9840000	2	3	Y	Y	Y	N
XP_005636171	EIF2B1	translation initiation factor eIF-2B subunit alpha [Canis lupus familiaris]	6	1	1	33.9	8.25	-	-	0	-	-	0	-	-	0	-	-	0	ID only	ID only	1	-	-	0	1	N	Y	N	N
XP_005633960	TPT1	translationally-controlled tumor protein [Canis lupus familiaris]	15	5	5	19.6	4.93	924000	136000	6.8	-	-	0	5060000	2870000	1.8	-	-	0	17500000	6700000	2.6	30700	49300	0.6	3	Y	Y	Y	N
XP_003639748	LOC100856243; TSN	translin [Canis lupus familiaris]	22	3	3	26.1	6.44	-	-	0	-	-	0	1740000	982000	1.8	-	-	0	2520000	1640000	1.5	-	-	0	2	N	Y	N	N
XP_536345	TSNAX	translin-associated protein X [Canis lupus familiaris]	7	1	1	33	6.55	-	-	0	-	-	0	-	-	0	-	-	0	ID only	ID only	1	-	-	0	1	N	Y	N	N
XP_005641052	SSR4	translocon-associated protein subunit delta isoform X1 [Canis lupus familiaris]	10	2	2	26.7	7.08	-	-	0	-	-	0	-	-	0	-	-	0	-	-	0	ID only	ID only	1	1	N	Y	N	N
XP_545686	TMCC2	transmembrane and coiled-coil domains protein 2 isoform X1 [Canis lupus familiaris]	3	1	1	78.9	6.79	-	-	0	ID only	ID only	1	-	-	0	-	-	0	-	-	0	ID only	39200	0.5	2	N	Y	N	N
XP_022278398	TMC8	transmembrane channel-like protein 8 [Canis lupus familiaris]	2	1	1	80.2	9.29	-	-	0	-	-	0	-	-	0	-	-	0	-	-	0	ID only	ID only	1	1	N	N	N	N
XP_538565	TMED9; LOC481444	transmembrane emp24 domain-containing protein 9 [Canis lupus familiaris]	9	2	2	27	7.93	-	-	0	70000	67600	1	-	-	0	-	-	0	-	-	0	231000	78100	3	2	N	Y	N	N
XP_022261550	TMEM109	transmembrane protein 109 isoform X1 [Canis lupus familiaris]	4	1	1	29.4	9.11	-	-	0	ID only	71800	0.5	-	-	0	-	-	0	-	-	0	432000	342000	1.3	2	N	Y	N	N
XP_534047	TMEM9B	transmembrane protein 9B isoform X1 [Canis lupus familiaris]	7	1	1	22.5	8.06	-	-	0	-	-	0	-	-	0	79900	40900	2	-	-	0	133000	ID only	10	2	Y	Y	N	N
XP_535270	TNPO1	transportin-1 [Canis lupus familiaris]	1	3	3	106.1	5.35	ID only	ID only	1	-	-	0	886000	533000	1.7	-	-	0	1420000	1130000	1.3	ID only	232000	0.5	3	N	Y	N	N
XP_013974531	TNPO3	transportin-3 isoform X1 [Canis lupus familiaris]	3	2	2	104.2	5.57	-	-	0	-	-	0	-	-	0	-	-	0	200000	113000	1.8	-	-	0	1	N	Y	N	N
XP_537290	TTR	transthyretin [Canis lupus familiaris]	19	7	7	15.9	6.92	8920000	405000	22	-	-	0	34700000	5890000	5.9	ID only	ID only	1	60500000	8850000	6.8	144000	40300	3.6	3	Y	Y	Y	N
NP_001002991	TFF2	trefoil factor 2 precursor [Canis lupus familiaris]	22	2	2	14.1	7.65	-	-	0	-	-	0	-	-	0	-	-	0	ID only	ID only	1	-	-	0	1	N	N	N	N
XP_022281735	TREML1; LOC474898	trem-like transcript 1 protein isoform X1 [Canis lupus familiaris]	32	10	10	56	5.76	528000000	58300000	9	20400000	1830000	11.2	311000000	23800000	13.1	22400000	4500000	5	620000000	42000000	14.8	37000000	22800000	1.6	3	Y	Y	Y	Y
XP_022281737	TREML2; LOC481791	trem-like transcript 2 protein isoform X1 [Canis lupus familiaris]	4	1	1	43	10.05	-	-	0	-	-	0	ID only	ID only	1	-	-	0	-	-	0	-	-	0	1	N	N	N	N
XP_003639634	LOC100856745; HADHA	trifunctional enzyme subunit alpha, mitochondrial [Canis lupus familiaris]	4	2	2	82.9	9.1	-	-	0	41800	19600	2.1	ID only	ID only	1	301000	243000	1.2	-	-	0	398000	187000	2.1	3	Y	Y	N	N
XP_849696	HADHB	trifunctional enzyme subunit beta, mitochondrial isoform X1 [Canis lupus familiaris]	4	2	2	51.2	9.45	-	-	0	ID only	ID only	1	-	-	0	122000	79000	1.5	-	-	0	328000	231000	1.4	3	N	Y	N	N
XP_005638901	LOC100856570, GART	trifunctional purine biosynthetic protein adenosine-3 [Canis lupus familiaris]	11	20	20	108.2	6.67	8690000	2580000	3.4	430000	116000	3.7	10700000	3920000	2.7	2200000	1070000	2.1	19100000	12000000	1.6	1740000	1060000	1.6	3	Y	Y	N	N
XP_013972843	TRIOBP	TRIO and F-actin-binding protein isoform X1 [Canis lupus familiaris]	1	2	2	244.7	8.4	-	-	0	-	-	0	ID only	ID only	1	-	-	0	54800	ID only	10	-	-	0	2	N	Y	N	N
XP_013976740	DAK; TKFC	triokinase/FMN cyclase isoform X1 [Canis lupus familiaris]	21	8	8	59.4	6.99	ID only	ID only	1	-	-	0	4050000	1460000	2.8	-	-	0	3800000	1690000	2.3	-	-	0	3	Y	Y	N	N
NP_001183983	TPI1	triosephosphate isomerase [Canis lupus familiaris]	23	24	24	26.7	7.33	85200000	29300000	2.9	427000	49200	8.7	241000000	151000000	1.6	1040000	403000	2.6	376000000	220000000	1.7	2310000	1740000	1.3	3	Y	Y	Y	Y
NP_001013869	TPP1	tripeptidyl-peptidase 1 precursor [Canis lupus familiaris]	5	2	2	61.3	7.06	ID only	ID only	1	137000	11000	12.5	393000	ID only	10	418000	43200	9.7	1220000	62300	19.7	914000	77700	11.8	3	Y	Y	Y	N
XP_005634119	LOC100855853; TPP2	tripeptidyl-peptidase 2 isoform X1 [Canis lupus familiaris]	14	10	10	139.8	6.65	ID only	ID only	1	38900	15100	2.6	312000	320000	1	2760000	1880000	1.5	160000	277000	0.6	1910000	1220000	1.6	3	N	Y	N	N
XP_531754	LOC474524; RTCB	tRNA-splicing ligase RtcB homolog isoform X1 [Canis lupus familiaris]	3	1	1	55.1	7.23	-	-	0	-	-	0	-	-	0	ID only	ID only	1	-	-	0	ID only	ID only	1	2	N	Y	N	N
XP_544679	TMOD3	tropomodulin-3 [Canis lupus familiaris]	16	5	5	39.6	5.14	2860000	933000	3.1	1010000	374000	2.7	2840000	1220000	2.3	1950000	1570000	1.2	5650000	2200000	2.6	2630000	2200000	1.2	3	Y	Y	N	N
XP_013964943	TPM1	tropomyosin alpha-1 chain isoform X1 [Canis lupus familiaris]	33	10	2	36.5	4.92	-	-	0	338000	123000	2.8	-	-	0	2040000	1950000	1	-	-	0	-	-	0	2	N	Y	Y	N
XP_864981	TPM1	tropomyosin alpha-1 chain isoform X11 [Canis lupus familiaris]	54	24	3	32.9	4.78	8930000	3970000	2.3	-	-	0	19200000	12200000	1.6	-	-	0	49300000	35600000	1.4	2490000	2000000	1.2	3	N	Y	N	N
XP_013964948	TPM1	tropomyosin alpha-1 chain isoform X14 [Canis lupus familiaris]	36	10	1	32.4	4.96	-	-	0	-	-	0	-	-	0	ID only	ID only	1	-	-	0	-	-	0	1	N	Y	N	N
XP_865093	TPM1	tropomyosin alpha-1 chain isoform X19 [Canis lupus familiaris]	58	23	4	28.7	4.78	81600	33000	2.5	-	-	0	1920000	1280000	1.5	-	-	0	2540000	3040000	0.8	33300	33400	1	3	N	Y	N	N
XP_005638544	TPM1	tropomyosin alpha-1 chain isoform X8 [Canis lupus familiaris]	62	23	4	32.6	4.72	-	-	0	-	-	0	-	-	0	-	-	0	1620000	809000	2	-	-	0	1	N	Y	N	N
NP_001239140	TPM3	tropomyosin alpha-3 chain [Canis lupus familiaris]	55	23	13	28.9	4.75	45600000	22600000	2	2310000	679000	3.4	-	-	0	4050000	4210000	1	-	-	0	6120000	5410000	1.1	3	N	Y	Y	Y
XP_005622310	TPM3	tropomyosin alpha-3 chain isoform X6 [Canis lupus familiaris]	72	28	14	29	4.78	-	-	0	-	-	0	87000000	56800000	1.5	-	-	0	143000000	123000000	1.2	-	-	0	2	N	Y	N	N
XP_003432953	TPM4	tropomyosin alpha-4 chain isoform X3 [Canis lupus familiaris]	74	36	21	28.5	4.69	379000000	214000000	1.8	24700000	5660000	4.4	1060000000	671000000	1.6	60700000	64200000	0.9	1420000000	1190000000	1.2	95900000	81200000	1.2	3	N	Y	Y	Y
XP_852943	TPM2	tropomyosin beta chain isoform X1 [Canis lupus familiaris]	37	17	1	32.8	4.7	ID only	ID only	1	-	-	0	ID only	ID only	1	-	-	0	16900000	ID only	10	-	-	0	3	N	Y	N	N
XP_537554	WARS	tryptophan--tRNA ligase, cytoplasmic [Canis lupus familiaris]	29	10	10	53.8	6.48	3000000	385000	7.8	-	-	0	6640000	3450000	1.9	ID only	ID only	1	4720000	4480000	1.1	-	-	0	3	N	Y	N	N
XP_013977827	TUBAL3	tubulin alpha chain-like 3 isoform X1 [Canis lupus familiaris]	9	5	1	49.7	5.71	-	-	0	-	-	0	-	-	0	-	-	0	ID only	ID only	1	-	-	0	1	N	Y	N	N
XP_022276492	LOC100855995	tubulin alpha chain-like isoform X1 [Canis lupus familiaris]	17	7	4	52.5	5.57	839000	154000	5.5	83400	490000	0.2	ID only	ID only	1	5900000	5490000	1.1	3530000	2360000	1.5	3600000	3320000	1.1	3	N	Y	N	N
NP_001301019		tubulin alpha-1A chain [Canis lupus familiaris]	75	26	8	50.1	5.06	-	-	0	-	-	0	124000000	46400000	2.7	ID only	329000	0.5	460000	359000	1.3	495000	950000	0.5	2	N	Y	N	N
XP_005640747	TUBA1B; LOC610636	tubulin alpha-1B chain isoform X1 [Canis lupus familiaris]	68	28	1	50.1	5.06	-	-	0	-	-	0	-	-	0	ID only	ID only	1	ID only	ID only	1	429000	ID only	10	2	N	N	Y	N
XP_003640008	LOC100856405; TUBA1C	tubulin alpha-1C chain [Canis lupus familiaris]	77	28	7	49.9	5.1	ID only	ID only	1	105000000	52600000	2	-	-	0	94300000	70400000	1.3	225000000	151000000	1.5	99500000	84000000	1.2	3	N	Y	N	N
XP_536077	TUBA4A	tubulin alpha-4A chain isoform X1 [Canis lupus familiaris]	81	31	11	49.9	5.06	103000000	22800000	4.5	30100000	16100000	1.9	369000000	158000000	2.3	316000000	239000000	1.3	789000000	488000000	1.6	390000000	342000000	1.1	3	Y	Y	Y	Y
XP_543889	TUBA8	tubulin alpha-8 chain isoform X1 [Canis lupus familiaris]	36	16	4	50	5.1	755000	28700	26.4	ID only	51800	0.5	574000	272000	2.1	452000	489000	0.9	1310000	1060000	1.2	848000	662000	1.3	3	Y	Y	Y	Y
XP_532060	TUBB	tubulin beta chain [Canis lupus familiaris]	82	30	5	49.6	4.89	59400000	10900000	5.5	10700000	6050000	1.8	50100000	14600000	3.4	35200000	24800000	1.4	91500000	54200000	1.7	39400000	32800000	1.2	3	Y	Y	Y	N
XP_005635298	TUBB1	tubulin beta-1 chain isoform X1 [Canis lupus familiaris]	71	29	24	65.6	5.69	156000000	36000000	4.3	40200000	21600000	1.9	216000000	76100000	2.8	203000000	120000000	1.7	389000000	271000000	1.4	212000000	163000000	1.3	3	Y	Y	Y	Y
XP_856151	TUBB2B; LOC478702	tubulin beta-2B chain [Canis lupus familiaris]	76	26	4	49.9	4.89	1050000	77000	13.7	-	-	0	-	-	0	76800	55200	1.4	1550000	1060000	1.5	701000	677000	1	3	N	Y	N	N
XP_005620593	TUBB3	tubulin beta-3 chain [Canis lupus familiaris]	32	17	2	50.4	4.93	4660000	261000	17.8	179000	76600	2.3	1240000	308000	4	-	-	0	-	-	0	ID only	ID only	1	3	Y	Y	N	N
XP_005633030	LOC100855815; TUBB4A	tubulin beta-4A chain [Canis lupus familiaris]	70	21	1	49.6	4.88	-	-	0	-	-	0	1200000	83800	14.3	-	-	0	-	-	0	-	-	0	1	N	Y	N	Y
XP_005625117	TUBB4B; LOC102153202	tubulin beta-4B chain isoform X2 [Canis lupus familiaris]	82	30	5	49.8	4.89	395000000	77500000	5.1	89400000	50200000	1.8	339000000	107000000	3.2	275000000	164000000	1.7	611000000	370000000	1.7	295000000	229000000	1.3	3	Y	Y	N	N
XP_013965975	LOC102152648	tubulin beta-4B chain-like [Canis lupus familiaris]	40	3	2	8.6	4.56	316000	99100	3.2	18000	30100	0.6	ID only	ID only	1	133000	74500	1.8	653000	358000	1.8	242000	236000	1	3	N	Y	N	N
XP_860433	TUBB6	tubulin beta-6 chain [Canis lupus familiaris]	51	17	8	49.8	4.88	837000	93600	8.9	407000	272000	1.5	398000	156000	2.5	1330000	683000	1.9	2750000	1310000	2.1	1520000	1080000	1.4	3	Y	Y	N	N
XP_531703	TTLL12	tubulin--tyrosine ligase-like protein 12 [Canis lupus familiaris]	2	20	20	73.9	5.4	1550000	864000	1.8	-	-	0	19500000	9490000	2.1	601000	244000	2.5	30400000	20500000	1.5	ID only	ID only	1	3	N	Y	N	N
XP_533685	TBCB	tubulin-folding cofactor B isoform X1 [Canis lupus familiaris]	13	8	8	27.4	5.15	ID only	ID only	1	-	-	0	4200000	1690000	2.5	-	-	0	6810000	3390000	2	39000	40100	1	3	Y	Y	N	N
XP_022273030	TBCA	tubulin-specific chaperone A [Canis lupus familiaris]	7	1	1	17.1	5.59	-	-	0	-	-	0	-	-	0	-	-	0	7200000	2240000	3.2	-	-	0	1	N	Y	N	N
XP_022272210	TBCD	tubulin-specific chaperone D, partial [Canis lupus familiaris]	2	2	2	128.2	6.83	-	-	0	-	-	0	ID only	ID only	1	-	-	0	ID only	ID only	1	-	-	0	2	N	Y	N	N
XP_005626399	TNFAIP8	tumor necrosis factor alpha-induced protein 8 isoform X1 [Canis lupus familiaris]	7	3	3	24.2	8.15	-	-	0	-	-	0	158000	42100	3.8	-	-	0	277000	54600	5.1	ID only	ID only	1	2	Y	Y	N	N
XP_013969589	TRADD	tumor necrosis factor receptor type 1-associated DEATH domain protein isoform X1 [Canis lupus familiaris]	5	1	1	37.6	7.23	-	-	0	-	-	0	-	-	0	-	-	0	ID only	ID only	1	-	-	0	1	N	Y	N	N
XP_022264696	TPD52L2	tumor protein D54 isoform X1 [Canis lupus familiaris]	5	1	1	29	8.16	-	-	0	-	-	0	-	-	0	73100	52400	1.4	-	-	0	-	-	0	1	N	Y	N	N
XP_543726	TWF1	twinfilin-1 [Canis lupus familiaris]	22	9	9	40.1	6.92	9840000	2980000	3.3	25100	136000	0.2	30000000	10500000	2.8	5520000	4350000	1.3	61300000	26500000	2.3	7090000	8680000	0.8	3	Y	Y	N	N
XP_022262353	TWF2; TLR9	twinfilin-2 [Canis lupus familiaris]	63	17	17	39.4	6.8	10300000	3170000	3.3	-	-	0	35500000	15500000	2.3	-	-	0	76300000	35300000	2.2	-	-	0	3	Y	Y	N	N
XP_535324	YARS	tyrosine--tRNA ligase, cytoplasmic isoform X1 [Canis lupus familiaris]	3	7	7	63	8.7	165000	103000	1.6	-	-	0	1620000	1200000	1.4	-	-	0	3900000	2690000	1.5	ID only	55900	0.5	3	N	Y	N	N
XP_005641623	BTK	tyrosine-protein kinase BTK [Canis lupus familiaris]	14	12	12	76.3	7.77	1230000	367000	3.4	ID only	33400	0.5	3350000	1260000	2.7	939000	443000	2.1	3200000	1810000	1.8	1600000	699000	2.3	3	Y	Y	N	N
XP_005638682	CSK	tyrosine-protein kinase CSK [Canis lupus familiaris]	3	5	5	50.6	7.05	1250000	117000	10.7	44900	38000	1.2	-	-	0	-	-	0	442000	269000	1.6	ID only	179000	0.5	2	N	Y	N	N
XP_544467	FGR	tyrosine-protein kinase Fgr [Canis lupus familiaris]	4	2	1	59.3	5.76	104000	12800	8.1	-	-	0	ID only	ID only	1	-	-	0	191000	85300	2.2	-	-	0	3	Y	Y	N	N
XP_854467	FYN	tyrosine-protein kinase Fyn isoform X1 [Canis lupus familiaris]	9	5	1	60.7	6.67	-	-	0	-	-	0	-	-	0	-	-	0	ID only	ID only	1	-	-	0	1	N	Y	N	N
XP_535078	LYN	tyrosine-protein kinase Lyn isoform X1 [Canis lupus familiaris]	27	9	8	58.7	7.34	1450000	135000	10.7	-	-	0	5940000	2100000	2.8	-	-	0	3280000	1310000	2.5	-	-	0	3	Y	Y	N	N
XP_005638056	LYN	tyrosine-protein kinase Lyn isoform X2 [Canis lupus familiaris]	37	12	11	56.2	6.58	-	-	0	1830000	722000	2.5	-	-	0	3210000	1450000	2.2	-	-	0	5400000	2140000	2.5	3	Y	Y	N	N
XP_022277720	SYK	tyrosine-protein kinase SYK isoform X1 [Canis lupus familiaris]	2	5	5	74.9	8.12	-	-	0	-	-	0	1790000	615000	2.9	393000	202000	1.9	3680000	2030000	1.8	558000	338000	1.7	2	N	Y	N	N
XP_005636307	PTPN11	tyrosine-protein phosphatase non-receptor type 11 isoform X1 [Canis lupus familiaris]	7	2	2	68.4	7.3	-	-	0	-	-	0	ID only	ID only	1	-	-	0	ID only	ID only	1	-	-	0	2	N	Y	N	N
XP_005631049	PTPN12	tyrosine-protein phosphatase non-receptor type 12 isoform X1 [Canis lupus familiaris]	4	8	8	85.6	6.1	ID only	ID only	1	-	-	0	231000	108000	2.1	98500	75600	1.3	942000	398000	2.4	166000	274000	0.6	3	Y	Y	N	N
XP_022266794	PTPN6	tyrosine-protein phosphatase non-receptor type 6 isoform X1 [Canis lupus familiaris]	2	4	4	67.8	7.77	ID only	ID only	1	-	-	0	785000	271000	2.9	ID only	ID only	1	2350000	1010000	2.3	ID only	ID only	1	3	Y	Y	N	N
XP_022270230	TDP2	tyrosyl-DNA phosphodiesterase 2 [Canis lupus familiaris]	5	1	1	39.3	5.83	-	-	0	-	-	0	-	-	0	-	-	0	-	-	0	86800	27400	3.2	1	N	N	N	N
XP_022281563		U6 snRNA-associated Sm-like protein LSm2 [Canis lupus familiaris]	20	1	1	10.8	6.52	ID only	ID only	1	-	-	0	ID only	ID only	1	-	-	0	919000	475000	1.9	-	-	0	3	N	Y	N	N
XP_855162	LSM6	U6 snRNA-associated Sm-like protein LSm6 isoform X1 [Canis lupus familiaris]	14	1	1	9.1	9.58	-	-	0	-	-	0	-	-	0	-	-	0	1260000	1010000	1.2	-	-	0	1	N	N	N	N
XP_022283099	LOC610321	UBAP1-MVB12-associated (UMA)-domain containing protein 1 isoform X2 [Canis lupus familiaris]	22	1	1	14.8	4.45	-	-	0	ID only	ID only	1	-	-	0	-	-	0	-	-	0	-	-	0	1	N	N	N	N
XP_537306	USP14	ubiquitin carboxyl-terminal hydrolase 14 isoform X1 [Canis lupus familiaris]	4	8	8	61.4	6.71	2130000	1100000	1.9	ID only	ID only	1	6790000	2810000	2.4	-	-	0	8890000	5180000	1.7	ID only	ID only	1	3	N	Y	N	N
XP_022263678	USP47	ubiquitin carboxyl-terminal hydrolase 47 [Canis lupus familiaris]	2	3	3	160.6	5.1	-	-	0	-	-	0	148000	ID only	10	-	-	0	510000	264000	1.9	-	-	0	2	N	Y	N	N
XP_543845	USP5	ubiquitin carboxyl-terminal hydrolase 5 isoform X1 [Canis lupus familiaris]	6	12	12	98.8	5.05	1110000	710000	1.6	-	-	0	14600000	5830000	2.5	431000	227000	1.9	10800000	8570000	1.3	358000	259000	1.4	3	N	Y	N	N
XP_022272071	UCHL1	ubiquitin carboxyl-terminal hydrolase isozyme L1 [Canis lupus familiaris]	6	1	1	32.9	5.36	-	-	0	-	-	0	116000	59200	2	-	-	0	-	-	0	-	-	0	1	N	N	N	N
XP_005634030	UCHL3	ubiquitin carboxyl-terminal hydrolase isozyme L3 isoform X2 [Canis lupus familiaris]	3	5	5	33.2	6.47	1190000	88400	13.4	-	-	0	3470000	1660000	2.1	-	-	0	4580000	2730000	1.7	61900	65500	0.9	3	Y	Y	N	N
XP_013976121	FAM63A; MINDY1	ubiquitin carboxyl-terminal hydrolase MINDY-1 isoform X1 [Canis lupus familiaris]	2	1	1	50.6	4.97	-	-	0	-	-	0	-	-	0	-	-	0	-	-	0	ID only	ID only	1	1	N	Y	N	N
XP_022263158	FAM188A; MINDY3	ubiquitin carboxyl-terminal hydrolase MINDY-3 isoform X1 [Canis lupus familiaris]	11	2	2	31	4.84	634000	146000	4.4	-	-	0	660000	214000	3.1	-	-	0	1110000	692000	1.6	-	-	0	3	Y	Y	N	N
XP_850373	UFD1L; UFD1	ubiquitin recognition factor in ER-associated degradation protein 1 [Canis lupus familiaris]	8	1	1	34.4	6.7	-	-	0	-	-	0	150000	ID only	10	97800	70000	1.4	ID only	ID only	1	58200	53000	1.1	2	N	Y	N	N
XP_547387	YOD1	ubiquitin thioesterase OTU1 isoform X1 [Canis lupus familiaris]	4	1	1	37.8	6.44	-	-	0	-	-	0	ID only	ID only	1	-	-	0	-	-	0	-	-	0	1	N	Y	N	N
XP_022261462	LOC100855636; OTUB1	ubiquitin thioesterase OTUB1 isoform X1 [Canis lupus familiaris]	32	8	8	32	5.44	362000	27400	13.2	-	-	0	2560000	948000	2.7	-	-	0	7080000	2270000	3.1	-	-	0	3	Y	Y	N	N
NP_001239157	RPS27A	ubiquitin-40S ribosomal protein S27a [Canis lupus familiaris]	10	2	2	18	9.64	23100000	3930000	5.9	396000	117000	3.4	25700000	7150000	3.6	5280000	2930000	1.8	22600000	14900000	1.5	4830000	2750000	1.8	3	Y	Y	N	N
XP_005619714	UBASH3B	ubiquitin-associated and SH3 domain-containing protein B [Canis lupus familiaris]	2	1	1	71.3	6.68	-	-	0	-	-	0	-	-	0	-	-	0	-	-	0	ID only	ID only	1	1	N	Y	N	N
XP_022281221	UBAP1	ubiquitin-associated protein 1 isoform X1 [Canis lupus familiaris]	2	1	1	58.6	5.67	ID only	ID only	1	-	-	0	-	-	0	-	-	0	-	-	0	-	-	0	1	N	Y	N	N
XP_855983	UBE2D2	ubiquitin-conjugating enzyme E2 D2 isoform X2 [Canis lupus familiaris]	36	3	2	16.7	7.83	ID only	ID only	1	-	-	0	2710000	898000	3	-	-	0	5480000	999000	5.5	-	-	0	3	Y	N	N	N
XP_005642515	LOC478495; UBE2D3	ubiquitin-conjugating enzyme E2 D3 [Canis lupus familiaris]	7	4	2	16.7	7.8	-	-	0	-	-	0	7060000	2560000	2.8	47500	41300	1.2	10800000	2520000	4.3	75900	82500	0.9	2	Y	Y	N	N
XP_003434442	UBE2K	ubiquitin-conjugating enzyme E2 K isoform X1 [Canis lupus familiaris]	14	1	1	22.4	5.44	ID only	ID only	1	-	-	0	-	-	0	-	-	0	ID only	ID only	1	-	-	0	2	N	Y	N	N
XP_534767	UBE2L3	ubiquitin-conjugating enzyme E2 L3 isoform X1 [Canis lupus familiaris]	43	4	4	17.9	8.51	-	-	0	-	-	0	-	-	0	-	-	0	1210000	247000	4.9	-	-	0	1	N	Y	Y	N
NP_001239060	UBE2N	ubiquitin-conjugating enzyme E2 N [Canis lupus familiaris]	58	5	5	17.1	6.57	-	-	0	-	-	0	189000	48100	3.9	-	-	0	845000	171000	4.9	-	-	0	2	Y	Y	N	N
XP_851403	LOC609108	ubiquitin-conjugating enzyme E2 N-like [Canis lupus familiaris]	4	1	1	25.1	7.74	886000	49800	17.8	-	-	0	-	-	0	-	-	0	-	-	0	-	-	0	1	N	Y	N	N
NP_001192025	UBE2V1	ubiquitin-conjugating enzyme E2 variant 1 [Canis lupus familiaris]	49	6	2	16.5	7.93	2320000	365000	6.3	-	-	0	5330000	2230000	2.4	-	-	0	1060000	348000	3.1	-	-	0	3	Y	Y	N	N
XP_022267931	UBE2V2	ubiquitin-conjugating enzyme E2 variant 2 isoform X1 [Canis lupus familiaris]	56	8	4	18.6	8.43	ID only	ID only	1	-	-	0	101000	44000	2.3	-	-	0	7520000	2770000	2.7	-	-	0	3	Y	Y	N	N
XP_536135	UFC1	ubiquitin-fold modifier-conjugating enzyme 1 [Canis lupus familiaris]	11	2	2	19.4	7.4	-	-	0	-	-	0	-	-	0	-	-	0	1240000	501000	2.5	-	-	0	1	N	Y	N	N
XP_013966859	UBA1	ubiquitin-like modifier-activating enzyme 1 [Canis lupus familiaris]	17	33	33	119.3	6.14	7430000	4100000	1.8	29000	ID only	10	45300000	23800000	1.9	2250000	1340000	1.7	56100000	35800000	1.6	1730000	947000	1.8	3	N	Y	N	Y
XP_532390	UBA6	ubiquitin-like modifier-activating enzyme 6 isoform X1 [Canis lupus familiaris]	5	3	3	117.8	6.14	-	-	0	-	-	0	295000	ID only	10	-	-	0	1490000	879000	1.7	-	-	0	2	N	Y	N	N
XP_535740	ATG3	ubiquitin-like-conjugating enzyme ATG3 [Canis lupus familiaris]	8	2	2	35.5	4.74	-	-	0	-	-	0	713000	184000	3.9	ID only	43900	0.5	1220000	618000	2	334000	375000	0.9	2	Y	Y	N	N
XP_533174	UBE2L6	ubiquitin/ISG15-conjugating enzyme E2 L6 isoform X1 [Canis lupus familiaris]	10	2	2	17.5	6.68	-	-	0	-	-	0	493000	288000	1.7	-	-	0	358000	140000	2.6	-	-	0	2	N	Y	N	N
XP_005631672	UBXN1	UBX domain-containing protein 1 [Canis lupus familiaris]	10	1	1	33.3	5.33	-	-	0	-	-	0	ID only	ID only	1	-	-	0	122000	64600	1.9	-	-	0	2	N	Y	N	N
XP_022269094	LOC100855555; GALE	UDP-glucose 4-epimerase [Canis lupus familiaris]	18	4	4	38.2	6.46	ID only	ID only	1	-	-	0	473000	207000	2.3	-	-	0	602000	361000	1.7	-	-	0	3	N	Y	N	N
XP_022261710	UGGT1	UDP-glucose:glycoprotein glucosyltransferase 1 isoform X1 [Canis lupus familiaris]	1	4	4	176.3	5.57	-	-	0	-	-	0	-	-	0	68300	40000	1.7	ID only	ID only	1	202000	56100	3.6	2	N	Y	N	N
XP_022280251	UXS1	UDP-glucuronic acid decarboxylase 1 isoform X1 [Canis lupus familiaris]	6	3	3	43.9	7.68	-	-	0	-	-	0	-	-	0	308000	34100	9	-	-	0	139000	ID only	10	2	Y	Y	N	N
XP_548360	UAP1L1; LOC491239	UDP-N-acetylhexosamine pyrophosphorylase-like protein 1 [Canis lupus familiaris]	2	1	1	55.9	6.01	-	-	0	-	-	0	179000	56700	3.2	-	-	0	-	-	0	-	-	0	1	N	N	N	N
XP_852849	CMPK1	UMP-CMP kinase isoform X1 [Canis lupus familiaris]	30	8	8	25.8	8.32	690000	224000	3.1	-	-	0	6030000	2810000	2.1	-	-	0	12900000	4380000	3	-	-	0	3	Y	Y	N	N
XP_022268379	C30H15orf39	uncharacterized protein C15orf39 homolog [Canis lupus familiaris]	2	1	1	105.8	7.43	-	-	0	-	-	0	-	-	0	-	-	0	ID only	ID only	1	-	-	0	1	N	N	N	N
XP_022278986	C9H17orf78	uncharacterized protein C17orf78 homolog [Canis lupus familiaris]	6	1	1	34.7	9.82	ID only	ID only	1	ID only	ID only	1	ID only	ID only	1	-	-	0	-	-	0	-	-	0	2	N	N	N	N
XP_850015	C4H1orf198	uncharacterized protein C1orf198 homolog isoform X1 [Canis lupus familiaris]	4	1	1	36.6	5.21	-	-	0	-	-	0	-	-	0	-	-	0	-	-	0	39000	12400	3.1	1	N	Y	N	N
XP_003431534	LOC100683920; C10H22orf46	uncharacterized protein C22orf46 homolog [Canis lupus familiaris]	1	1	1	187.6	6.06	-	-	0	-	-	0	ID only	ID only	1	-	-	0	-	-	0	-	-	0	1	N	N	N	N
XP_022282716	LOC100855769; PAICS	uncharacterized protein KIAA1211 isoform X3 [Canis lupus familiaris]	1	4	4	232.2	6.99	-	-	0	63200	24600	2.6	666000	119000	5.6	1310000	416000	3.2	829000	739000	1.1	ID only	ID only	1	3	Y	Y	N	N
XP_022270233	LOC106558262	uncharacterized protein LOC106558262 [Canis lupus familiaris]	2	2	2	58.2	10.86	-	-	0	621000	6130	101.3	-	-	0	-	-	0	-	-	0	ID only	39400	0.5	2	N	N	N	N
XP_003639307	LOC100855443; MYO1C	unconventional myosin-Ic isoform X1 [Canis lupus familiaris]	16	12	12	121.9	9.35	-	-	0	258000	166000	1.6	-	-	0	2360000	1310000	1.8	ID only	187000	0.5	4010000	2780000	1.4	3	N	Y	N	N
XP_849816	C27H12orf10	UPF0160 protein MYG1, mitochondrial [Canis lupus familiaris]	3	2	2	42.9	6.99	-	-	0	-	-	0	364000	149000	2.4	-	-	0	232000	187000	1.2	-	-	0	2	N	Y	N	N
XP_022261632	LOC483828; C19H4orf33	UPF0462 protein C4orf33 homolog isoform X1 [Canis lupus familiaris]	3	1	1	34.5	6.13	-	-	0	-	-	0	-	-	0	-	-	0	411000	199000	2.1	-	-	0	1	N	Y	N	N
XP_533512	C1H9orf64	UPF0553 protein C9orf64 homolog [Canis lupus familiaris]	17	4	4	38.8	6.15	-	-	0	-	-	0	567000	451000	1.3	-	-	0	4690000	1740000	2.7	-	-	0	2	N	Y	N	N
XP_536703	C5H1orf123	UPF0587 protein C1orf123 homolog isoform X1 [Canis lupus familiaris]	4	1	1	22.1	8.43	-	-	0	-	-	0	453000	256000	1.8	-	-	0	464000	180000	2.6	-	-	0	2	N	Y	N	N
XP_005619416	LOC100856615; C4H5orf51	UPF0600 protein C5orf51 homolog [Canis lupus familiaris]	10	1	1	33.6	5.07	-	-	0	-	-	0	-	-	0	-	-	0	ID only	ID only	1	-	-	0	1	N	Y	N	N
XP_540844	C18H11orf68	UPF0696 protein C11orf68 homolog [Canis lupus familiaris]	4	1	1	31.6	6.1	-	-	0	-	-	0	-	-	0	-	-	0	218000	68300	3.2	-	-	0	1	N	Y	N	N
XP_535769	UMPS	uridine 5'-monophosphate synthase [Canis lupus familiaris]	2	5	5	52.4	6.95	544000	28900	18.9	-	-	0	ID only	ID only	1	-	-	0	1340000	ID only	10	ID only	ID only	1	3	Y	Y	N	N
XP_022260851	UPP1	uridine phosphorylase 1 [Canis lupus familiaris]	5	16	16	45.4	7.8	-	-	0	-	-	0	54700000	34300000	1.6	1020000	302000	3.4	-	-	0	-	-	0	1	N	N	N	N
XP_013975464	PLAUR	urokinase plasminogen activator surface receptor [Canis lupus familiaris]	21	5	5	40.5	6.79	-	-	0	-	-	0	336000	ID only	10	-	-	0	915000	ID only	10	-	-	0	2	Y	N	N	N
XP_532602	UROD	uroporphyrinogen decarboxylase isoform X1 [Canis lupus familiaris]	19	4	4	40.8	6.25	249000	49400	5	-	-	0	645000	659000	1	-	-	0	1360000	1400000	1	-	-	0	3	N	Y	N	N
XP_022267444	UROS	uroporphyrinogen-III synthase isoform X1 [Canis lupus familiaris]	70	13	13	28.6	6.21	25300	2630	9.6	-	-	0	6250000	3070000	2	-	-	0	17200000	10000000	1.7	-	-	0	3	Y	Y	N	N
XP_005626208	UGP2	UTP--glucose-1-phosphate uridylyltransferase isoform X1 [Canis lupus familiaris]	5	4	4	56.9	7.88	952000	227000	4.2	158000	38700	4.1	1730000	879000	2	247000	72100	3.4	1100000	825000	1.3	661000	228000	2.9	3	Y	Y	N	N
XP_005632874	RAD23A	UV excision repair protein RAD23 homolog A isoform X1 [Canis lupus familiaris]	17	2	2	39.6	4.58	ID only	ID only	1	-	-	0	294000	138000	2.1	-	-	0	497000	389000	1.3	-	-	0	3	N	N	N	N
XP_022263213	VSTM5	V-set and transmembrane domain-containing protein 5 isoform X1 [Canis lupus familiaris]	6	1	1	29.2	7.2	-	-	0	-	-	0	-	-	0	-	-	0	-	-	0	298000	165000	1.8	1	N	N	N	N
XP_013968352	C4H10orf54; VSIR	V-type immunoglobulin domain-containing suppressor of T-cell activation [Canis lupus familiaris]	12	2	2	34.6	7.36	-	-	0	ID only	ID only	1	-	-	0	37100	84000	0.4	-	-	0	75600	132000	0.6	3	N	Y	N	N
XP_013972026	ATP6V0A1	V-type proton ATPase 116 kDa subunit a isoform X1 [Canis lupus familiaris]	8	5	5	99.6	6.29	-	-	0	34800	29800	1.2	-	-	0	238000	184000	1.3	-	-	0	995000	473000	2.1	3	N	Y	N	N
XP_537002	ATP6V0C	V-type proton ATPase 16 kDa proteolipid subunit [Canis lupus familiaris]	20	1	1	15.7	9.13	-	-	0	-	-	0	-	-	0	-	-	0	-	-	0	ID only	ID only	1	1	N	N	N	N
XP_545103	ATP6V1A	V-type proton ATPase catalytic subunit A [Canis lupus familiaris]	21	9	9	68.4	5.52	118000	123000	1	119000	31400	3.8	4060000	1880000	2.2	1940000	988000	2	7950000	5080000	1.6	1780000	974000	1.8	3	Y	Y	N	N
XP_543263	ATP6V1B2	V-type proton ATPase subunit B, brain isoform [Canis lupus familiaris]	23	6	6	56.5	5.81	1070000	54700	19.6	221000	72700	3	642000	354000	1.8	981000	540000	1.8	2150000	1060000	2	1370000	349000	3.9	3	Y	Y	N	N
XP_537484	ATP6V1D	V-type proton ATPase subunit D [Canis lupus familiaris]	11	2	2	28.3	9.36	-	-	0	143000	21400	6.7	ID only	ID only	1	ID only	ID only	1	392000	192000	2	-	-	0	3	N	Y	N	N
XP_536816	ATP6V0D1	V-type proton ATPase subunit d 1 [Canis lupus familiaris]	12	3	3	40.4	4.96	-	-	0	-	-	0	-	-	0	181000	70400	2.6	-	-	0	1000000	574000	1.7	2	N	Y	N	N
XP_005637441	ATP6V1E1	V-type proton ATPase subunit E 1 [Canis lupus familiaris]	12	2	2	26.2	8.43	-	-	0	-	-	0	-	-	0	892000	500000	1.8	1300000	754000	1.7	375000	192000	2	2	N	Y	N	N
XP_539060	LOC481939	V-type proton ATPase subunit G 1-like [Canis lupus familiaris]	11	1	1	14.7	8.27	ID only	ID only	1	-	-	0	49300	11200	4.4	57100	36400	1.6	95300	49500	1.9	71200	29900	2.4	3	N	Y	N	N
XP_544082	ATP6V1H	V-type proton ATPase subunit H isoform X1 [Canis lupus familiaris]	6	2	2	55.8	6.61	-	-	0	17700	24800	0.7	ID only	ID only	1	154000	ID only	10	242000	26400	9.2	-	-	0	3	N	Y	N	N
XP_853625	ATP6AP1	V-type proton ATPase subunit S1 [Canis lupus familiaris]	3	1	1	51.5	5.97	-	-	0	-	-	0	-	-	0	-	-	0	ID only	ID only	1	-	-	0	1	N	Y	N	N
XP_003639898	LOC100856310; VPS16	vacuolar protein sorting-associated protein 16 homolog isoform X1 [Canis lupus familiaris]	3	2	2	94.8	6.93	-	-	0	-	-	0	-	-	0	-	-	0	-	-	0	574000	205000	2.8	1	N	Y	N	N
XP_544627	VPS18	vacuolar protein sorting-associated protein 18 homolog isoform X1 [Canis lupus familiaris]	2	1	1	110.1	6.1	-	-	0	-	-	0	-	-	0	-	-	0	-	-	0	ID only	ID only	1	1	N	Y	N	N
XP_005619021	VPS26A	vacuolar protein sorting-associated protein 26A isoform X1 [Canis lupus familiaris]	20	13	13	41.8	7.58	5800000	1380000	4.2	224000	77300	2.9	5940000	3760000	1.6	2050000	533000	3.9	28800000	18400000	1.6	1220000	619000	2	3	Y	Y	N	N
XP_849245	VPS28	vacuolar protein sorting-associated protein 28 homolog isoform X1 [Canis lupus familiaris]	8	1	1	25.5	5.54	153000	59000	2.6	-	-	0	59500	ID only	10	69600	ID only	10	96600	ID only	10	-	-	0	3	Y	Y	N	N
NP_001273798	VPS29	vacuolar protein sorting-associated protein 29 isoform 1 [Canis lupus familiaris]	12	4	4	20.9	7.05	1760000	804000	2.2	102000	103000	1	1410000	699000	2	175000	79900	2.2	2120000	875000	2.4	427000	161000	2.7	3	Y	Y	N	N
XP_532570	VPS35	vacuolar protein sorting-associated protein 35 isoform X1 [Canis lupus familiaris]	10	13	13	91.6	5.49	749000	626000	1.2	414000	214000	1.9	12400000	6660000	1.9	2160000	1340000	1.6	16400000	11200000	1.5	5010000	2290000	2.2	3	N	Y	N	N
XP_540924	VPS37C	vacuolar protein sorting-associated protein 37C [Canis lupus familiaris]	4	1	1	38.7	5	-	-	0	-	-	0	-	-	0	ID only	ID only	1	-	-	0	-	-	0	1	N	Y	N	N
XP_005615402	VPS4B	vacuolar protein sorting-associated protein 4B [Canis lupus familiaris]	5	1	1	49.2	7.15	182000	108000	1.7	-	-	0	-	-	0	-	-	0	ID only	ID only	1	-	-	0	2	N	Y	N	N
XP_860959	VTA1	vacuolar protein sorting-associated protein VTA1 homolog [Canis lupus familiaris]	12	2	2	33.8	6.29	-	-	0	-	-	0	-	-	0	ID only	ID only	1	235000	89500	2.6	114000	62700	1.8	2	N	Y	N	N
XP_849270	VPS25	vacuolar protein-sorting-associated protein 25 [Canis lupus familiaris]	11	1	1	20.7	6.34	ID only	ID only	1	ID only	ID only	1	610000	145000	4.2	260000	84000	3.1	1140000	332000	3.4	290000	138000	2.1	3	Y	Y	N	N
XP_548183	SNF8	vacuolar-sorting protein SNF8 isoform X1 [Canis lupus familiaris]	10	2	2	28.8	6.65	312000	43600	7.2	-	-	0	ID only	ID only	1	ID only	ID only	1	549000	181000	3	49500	31100	1.6	3	Y	Y	N	N
XP_538837	VARS	valine--tRNA ligase [Canis lupus familiaris]	5	4	4	140.3	7.77	ID only	ID only	1	ID only	5510	0.5	ID only	ID only	1	73700	33200	2.2	134000	123000	1.1	-	-	0	3	N	Y	N	N
NP_001003256	VASP	vasodilator-stimulated phosphoprotein [Canis lupus familiaris]	41	12	2	40.4	7.99	-	-	0	-	-	0	31000	5260	5.9	10900000	8820000	1.2	-	-	0	14700000	11200000	1.3	2	N	Y	N	N
XP_005615785	VASP	vasodilator-stimulated phosphoprotein isoform X1 [Canis lupus familiaris]	41	13	13	40.5	7.99	53300000	12700000	4.2	4240000	1670000	2.5	28600000	6380000	4.5	320000	418000	0.8	74600000	27400000	2.7	37100	221000	0.2	3	Y	Y	N	N
XP_005623749	VASH1	vasohibin-1 [Canis lupus familiaris]	6	1	1	40.8	9.41	ID only	ID only	1	-	-	0	57800	20400	2.8	-	-	0	88400	62300	1.4	-	-	0	3	N	N	N	N
XP_535473	SLC27A2	very long-chain acyl-CoA synthetase [Canis lupus familiaris]	2	1	1	70.2	8.57	48200	121000	0.4	-	-	0	-	-	0	-	-	0	-	-	0	-	-	0	1	N	Y	N	N
XP_003433671	VTI1A	vesicle transport through interaction with t-SNAREs homolog 1A isoform X2 [Canis lupus familiaris]	11	1	1	25.2	6.15	-	-	0	-	-	0	ID only	ID only	1	ID only	ID only	1	ID only	ID only	1	72500	80500	0.9	2	N	Y	N	N
XP_005620536	VAMP3	vesicle-associated membrane protein 3 [Canis lupus familiaris]	42	5	5	11.5	8.79	-	-	0	-	-	0	-	-	0	885000	698000	1.3	-	-	0	1730000	957000	1.8	2	N	Y	N	N
XP_539938	VAMP5	vesicle-associated membrane protein 5 [Canis lupus familiaris]	11	1	1	12.7	6.09	-	-	0	-	-	0	-	-	0	ID only	ID only	1	-	-	0	108000	47700	2.3	2	N	Y	N	N
XP_855489	VAMP7	vesicle-associated membrane protein 7 isoform X1 [Canis lupus familiaris]	25	5	5	25.3	8.43	1020000	342000	3	195000	173000	1.1	1760000	76500	23	584000	368000	1.6	3050000	585000	5.2	1730000	993000	1.7	3	Y	Y	N	N
XP_013976017	VAMP8	vesicle-associated membrane protein 8 [Canis lupus familiaris]	33	3	3	11.5	8.21	-	-	0	-	-	0	-	-	0	402000	350000	1.2	-	-	0	737000	330000	2.2	2	N	Y	N	N
XP_022277344	VAPA	vesicle-associated membrane protein-associated protein A isoform X1 [Canis lupus familiaris]	6	1	1	33.9	9.09	-	-	0	-	-	0	-	-	0	-	-	0	-	-	0	85300	66600	1.3	1	N	Y	N	N
XP_013971057	VAPA	vesicle-associated membrane protein-associated protein A isoform X2 [Canis lupus familiaris]	4	1	1	32.5	9.04	-	-	0	-	-	0	296000	ID only	10	-	-	0	-	-	0	-	-	0	1	N	Y	N	N
XP_013971058	VAPA	vesicle-associated membrane protein-associated protein A isoform X3 [Canis lupus familiaris]	7	1	1	29.2	8.7	-	-	0	-	-	0	-	-	0	-	-	0	184000	57600	3.2	-	-	0	1	N	Y	N	N
XP_534466	VAPB	vesicle-associated membrane protein-associated protein B/C isoform X3 [Canis lupus familiaris]	6	1	1	27.1	7.3	ID only	ID only	1	-	-	0	-	-	0	-	-	0	ID only	ID only	1	-	-	0	2	N	Y	N	N
XP_548044	NSF	vesicle-fusing ATPase [Canis lupus familiaris]	2	1	1	83.5	6.99	-	-	0	-	-	0	19700000	1000000	19.6	180000	148000	1.2	ID only	ID only	1	176000	126000	1.4	2	N	Y	N	N
XP_533025	SEC22B; LOC475816	vesicle-trafficking protein SEC22b [Canis lupus familiaris]	20	2	2	24.7	8.5	-	-	0	ID only	ID only	1	-	-	0	106000	92700	1.1	ID only	ID only	1	238000	136000	1.7	3	N	Y	N	N
NP_001003258	LMAN2	vesicular integral-membrane protein VIP36 precursor [Canis lupus familiaris]	3	4	4	40.2	6.95	104000	ID only	10	-	-	0	620000	99300	6.2	69400	43100	1.6	754000	253000	3	141000	94900	1.5	3	Y	Y	N	N
XP_536395	VCL	vinculin [Canis lupus familiaris]	63	79	79	127.2	5.8	341000000	238000000	1.4	92400000	30000000	3.1	1140000000	647000000	1.8	348000000	247000000	1.4	2100000000	1440000000	1.5	404000000	363000000	1.1	3	N	Y	Y	Y
XP_005628336	GC	vitamin D-binding protein [Canis lupus familiaris]	13	19	19	52.9	5.33	23800000	1840000	12.9	15300	1280	11.9	37300000	4110000	9.1	984000	173000	5.7	61900000	11000000	5.6	733000	138000	5.3	3	Y	Y	Y	Y
XP_005621301	VKORC1	vitamin K epoxide reductase complex subunit 1 isoform X1 [Canis lupus familiaris]	8	1	1	18	9.17	-	-	0	-	-	0	-	-	0	-	-	0	-	-	0	78500	30800	2.5	1	N	Y	N	N
XP_022269453	PROS1	vitamin K-dependent protein S [Canis lupus familiaris]	14	24	24	114.2	8.37	40200000	4970000	8.1	2350000	206000	11.4	147000000	10400000	14.1	18700000	3380000	5.5	190000000	24200000	7.8	18600000	3410000	5.4	3	Y	Y	Y	Y
XP_854040	VTN	vitronectin [Canis lupus familiaris]	19	10	10	53.7	5.15	2530000	64400	39.3	1220000	25500	47.8	11300000	902000	12.6	16000000	1270000	12.7	15800000	1800000	8.8	11200000	927000	12	3	Y	Y	Y	N
XP_013973193	VDAC1	voltage-dependent anion-selective channel protein 1 [Canis lupus familiaris]	16	3	3	30.7	8.54	-	-	0	-	-	0	-	-	0	ID only	ID only	1	-	-	0	116000	62000	1.9	2	N	Y	N	N
XP_851742	VDAC2	voltage-dependent anion-selective channel protein 2 [Canis lupus familiaris]	18	4	4	31.6	7.55	-	-	0	-	-	0	-	-	0	1120000	509000	2.2	-	-	0	3670000	2000000	1.8	2	N	Y	N	N
NP_001238894	VDAC3	voltage-dependent anion-selective channel protein 3 isoform 1 [Canis lupus familiaris]	12	3	3	30.7	8.78	-	-	0	-	-	0	-	-	0	511000	194000	2.6	-	-	0	944000	491000	1.9	2	N	Y	N	N
XP_022266547	VWF	von Willebrand factor isoform X1 [Canis lupus familiaris]	3	9	9	322.3	5.77	138000	23500	5.9	735000	141000	5.2	3880000	415000	9.3	1890000	592000	3.2	8240000	817000	10.1	2110000	524000	4	3	Y	Y	Y	Y
XP_005640388	WIPF1	WAS/WASL-interacting protein family member 1 [Canis lupus familiaris]	3	1	1	50.9	11.56	-	-	0	-	-	0	-	-	0	-	-	0	-	-	0	100000	180000	0.6	1	N	Y	N	N
XP_532327	KIAA0196; WASHC5	WASH complex subunit 5 [Canis lupus familiaris]	1	1	1	134.2	6.99	-	-	0	-	-	0	-	-	0	-	-	0	-	-	0	ID only	ID only	1	1	N	Y	N	N
NP_001124309	WDR1	WD repeat-containing protein 1 [Canis lupus familiaris]	39	41	41	66.3	6.62	185000000	63800000	2.9	1810000	552000	3.3	571000000	445000000	1.3	8850000	4500000	2	704000000	592000000	1.2	10200000	5880000	1.7	3	Y	Y	Y	N
XP_013967122	WDR13	WD repeat-containing protein 13 isoform X1 [Canis lupus familiaris]	8	2	2	53.7	9.23	370000	131000	2.8	-	-	0	68200	31100	2.2	-	-	0	286000	216000	1.3	-	-	0	3	Y	Y	N	Y
XP_022263891	WDR37	WD repeat-containing protein 37 isoform X1 [Canis lupus familiaris]	3	1	1	56.4	8.87	-	-	0	-	-	0	-	-	0	-	-	0	-	-	0	ID only	ID only	1	1	N	Y	N	N
XP_538149	WDR44	WD repeat-containing protein 44 [Canis lupus familiaris]	1	1	1	101.1	5.57	-	-	0	-	-	0	-	-	0	ID only	ID only	1	ID only	ID only	1	ID only	ID only	1	2	N	Y	N	N
XP_005630603	WDR54	WD repeat-containing protein 54 [Canis lupus familiaris]	8	1	1	35.6	6.32	-	-	0	-	-	0	20100	ID only	10	-	-	0	-	-	0	-	-	0	1	N	N	N	N
XP_536215	WDR61	WD repeat-containing protein 61 [Canis lupus familiaris]	12	2	2	33.5	5.36	190000	61600	3.1	79600	23300	3.4	643000	419000	1.5	-	-	0	1270000	1010000	1.3	233000	110000	2.1	3	Y	Y	N	N
XP_013975546	WRN	Werner syndrome ATP-dependent helicase isoform X1 [Canis lupus familiaris]	2	1	1	165.4	6.58	-	-	0	-	-	0	-	-	0	ID only	ID only	1	-	-	0	-	-	0	1	N	N	N	N
XP_548986	WAS	wiskott-Aldrich syndrome protein [Canis lupus familiaris]	3	4	4	52.9	6.64	ID only	ID only	1	-	-	0	162000	22600	7.2	173000	156000	1.1	320000	16300	19.6	161000	ID only	10	3	Y	Y	N	N
XP_005617771	WASF2	wiskott-Aldrich syndrome protein family member 2 [Canis lupus familiaris]	8	3	3	54.3	5.63	ID only	ID only	1	-	-	0	-	-	0	1380000	1240000	1.1	398000	464000	0.9	3700000	1470000	2.5	3	N	Y	N	N
XP_849363	WBP2	WW domain-binding protein 2 isoform X1 [Canis lupus familiaris]	5	2	2	28	5.91	-	-	0	-	-	0	ID only	ID only	1	ID only	ID only	1	358000	372000	1	ID only	ID only	1	2	N	Y	N	N
XP_864026	XPNPEP1	xaa-Pro aminopeptidase 1 isoform X1 [Canis lupus familiaris]	27	10	10	74.6	5.97	276000	245000	1.1	-	-	0	8490000	5280000	1.6	-	-	0	9680000	7250000	1.3	-	-	0	3	N	Y	N	N
XP_533702	PEPD	xaa-Pro dipeptidase isoform X1 [Canis lupus familiaris]	25	9	9	54.8	5.96	2750000	152000	18.1	-	-	0	6350000	3770000	1.7	-	-	0	5130000	4180000	1.2	-	-	0	3	N	Y	N	N
NP_001008714	XYLT2	xylosyltransferase 2 [Canis lupus familiaris]	3	2	2	96.7	8.4	-	-	0	-	-	0	265000	ID only	10	-	-	0	535000	ID only	10	-	-	0	2	Y	Y	Y	N
XP_022277525	ZFHX2	zinc finger homeobox protein 2 [Canis lupus familiaris]	1	1	1	272.9	6.06	174000	ID only	10	-	-	0	-	-	0	-	-	0	-	-	0	-	-	0	1	N	N	N	N
XP_022267642	ZNF518A	zinc finger protein 518A [Canis lupus familiaris]	1	1	1	167.5	9.26	ID only	ID only	1	-	-	0	-	-	0	-	-	0	-	-	0	-	-	0	1	N	N	N	N
XP_022258952	ZNF208; LOC102152536	zinc finger protein 844 [Canis lupus familiaris]	2	1	1	126	8.84	-	-	0	-	-	0	-	-	0	-	-	0	2720000	583000	4.7	-	-	0	1	N	N	N	N
XP_005619923	ZZEF1	zinc finger ZZ-type and EF-hand domain-containing protein 1 isoform X1 [Canis lupus familiaris]	1	1	1	330.1	6.02	-	-	0	ID only	ID only	1	-	-	0	-	-	0	-	-	0	ID only	ID only	1	2	N	Y	N	N
NP_001274074	AZGP1	zinc-alpha-2-glycoprotein precursor [Canis lupus familiaris]	22	4	4	35.8	4.92	355000	19500	18.2	-	-	0	506000	41500	12.2	-	-	0	1150000	113000	10.1	-	-	0	3	Y	Y	Y	N
XP_005629790	ZYX	zyxin [Canis lupus familiaris]	25	8	8	58.1	8.47	2740000	1700000	1.6	120000	111000	1.1	9150000	3700000	2.5	7720000	6530000	1.2	13200000	8080000	1.6	8410000	7830000	1.1	3	N	Y	Y	Y
Flow through proteins
Accession	Gene Symbol	Description	Coverage [%]	# Peptides	# Unique Peptides	MW [kDa]	calc. pI	D1-D3 Flow through sample	D1-D3 Flow through control	D1-D3 Flow through ratio																		Human Burkhart	In Parsons et al. 2018 core	In Martín-Granado et al. 2017 top 100
XP_005630014.1	ASAH1	acid ceramidase [Canis lupus familiaris]	3	1	1	42.1	8.16	20552	99520.4	0.207																		Y	Y	N
XP_546604.2	ALOX12B	arachidonate 12-lipoxygenase, 12R-type [Canis lupus familiaris]	1	1	1	80.2	7.05	10342	45666.4	0.226																		N	N	N
XP_532053.3	ARG1	arginase-1 [Canis lupus familiaris]	8	2	2	34.6	7.2	48313	248851	0.194																		N	N	N
XP_852568.1	SNCB	beta-synuclein [Canis lupus familiaris]	20	2	2	14.2	4.41	ID only	ID only	1																		N	N	N
XP_855383.3	PPP3R1	calcineurin subunit B type 1 isoform X1 [Canis lupus familiaris]	15	1	1	20.8	4.91	ID only	ID only	1																		Y	N	N
XP_013964581.1	DMBT1	deleted in malignant brain tumors 1 protein isoform X1 [Canis lupus familiaris]	5	2	2	232.9	5.06	12622.2	54882.5	0.23																		N	N	N
NP_001300789.1	DSC1	desmocollin-1 precursor [Canis lupus familiaris]	1	1	1	100	5.55	56543.5	280169	0.202																		N	N	N
XP_003434996.1	DSC3	desmocollin-3 [Canis lupus familiaris]	1	1	1	121.4	6.2	18376.1	35728.2	0.514																		N	N	N
XP_005622273.1	DSG1	desmoglein-1 isoform X1 [Canis lupus familiaris]	6	6	6	114.5	4.93	270422	1.61381e+06	0.198																		N	N	N
XP_005621958.1	FNBP1L	formin-binding protein 1-like isoform X1 [Canis lupus familiaris]	2	1	1	70.5	6.64	ID only	581541	0.5																		Y	N	N
NP_001003295.2	HSPB1	heat shock protein beta-1 [Canis lupus familiaris]	5	1	1	22.8	6.7	6325.84	49349.3	0.128																		Y	Y	N
XP_013965994.2	LOC488308	histone H2A type 1-E [Canis lupus familiaris]	13	1	1	16.7	10.61	23839.3	42046.5	0.567																		Y	N	N
XP_003640345.1	LOC100855764	histone H2B type 1-like, partial [Canis lupus familiaris]	6	1	1	25.5	10.18	28847.6	52654.9	0.548																		N	N	N
NP_001332987.1	KRT23	keratin, type I cytoskeletal 23 [Canis lupus familiaris]	7	4	1	47.8	6.13	13697.6	246625	0.053																		N	N	N
XP_022276393.1	KIF27	kinesin-like protein KIF27 isoform X1 [Canis lupus familiaris]	0	1	1	160.6	6.79	69712.5	10016.7	6.96																		N	N	N
XP_005615353.1	MBP	myelin basic protein isoform X1 [Canis lupus familiaris]	4	2	2	35.3	10.08	102684	269382	0.383																		Y	N	N
XP_022271814.1	POF1B	protein POF1B isoform X1 [Canis lupus familiaris]	2	1	1	68.8	6.4	ID only	ID only	1																		N	N	N
XP_005634933.1	TGM3	protein-glutamine gamma-glutamyltransferase E [Canis lupus familiaris]	1	1	1	77.6	6.33	84341.1	65906.2	1.28																		N	N	N
XP_022265595.1	RNF17	RING finger protein 17 isoform X1 [Canis lupus familiaris]	1	1	1	183.6	5.52	39459.6	89363.2	0.442																		N	N	N
XP_022270502.1	SERPINB12	serpin B12 [Canis lupus familiaris]	4	1	1	47.8	5.05	73048	629058	0.116																		N	N	N
