# Supplementary material for: Proteomic profiling of the thrombin-activated canine platelet secretome (CAPS)
Source: PLoS One. 2019 Nov 13;14(11):e0224891. doi: 10.1371/journal.pone.0224891 (PMC6853320; doi:10.1371/journal.pone.0224891)
Supplement: S3 Table — The 693 proteins found in at least 2/3 dogs with a stim/control ratio ≥ 2. The table is divided into proteins found in both the soluble and the pellet fraction (n = 144), proteins solely found in the soluble fraction (n = 360), and proteins solely found in the pellet fraction (n = 189). They are further sorted based on highest to lowest MS1-abundance. Fifty proteins (7.2%) total were identified with a single peptide. (XLSX) [file pone.0224891.s006.xlsx]

## Sheet: Table S3_CAPS proteins (R1)
Table S3. CAPS proteins.
The 693 proteins found in at least 2/3 dogs with a stim/control ratio ≥ 2. The table is divided into proteins found in both the soluble and the pellet fraction (n = 144), proteins solely found in the soluble fraction (n = 360), and proteins solely found in the pellet fraction (n = 189). They are further soretd based on highest to lowest MS1-abundance. Fifty proteins (7.2%) total were identified w…
Gene symbol	Description	Abundance rank	Average abundance stim samples	Average abundance control samples	In Parsons et al. 2018 core	In Martín-Granado et al. 2017 top 100
CAPS protein of both the soluble and the pellet fraction (n = 144)
THBS1	thrombospondin-1 [Canis lupus familiaris]	1	4660000000	886000000	Y	Y
FGA	fibrinogen alpha chain [Canis lupus familiaris]	2	2250000000	404000000	Y	N
FGB	fibrinogen beta chain [Canis lupus familiaris]	3	1870000000	358000000	Y	Y
FGG	fibrinogen gamma chain isoform X1 [Canis lupus familiaris]	4	1760000000	308000000	Y	Y
ALB	serum albumin precursor [Canis lupus familiaris]	6	1000000000	301000000	Y	Y
PPBP	platelet basic protein precursor [Canis lupus familiaris]	8	805000000	118000000	Y	Y
CCL14; LOC480603	C-C motif chemokine 14 [Canis lupus familiaris]	9	716000000	113000000	N	N
TIMP1	metalloproteinase inhibitor 1 isoform X1 [Canis lupus familiaris]	11	489000000	54400000	Y	N
TREML1; LOC474898	trem-like transcript 1 protein isoform X1 [Canis lupus familiaris]	16	256000000	25500000	Y	Y
PLEK	pleckstrin [Canis lupus familiaris]	18	231000000	100000000	Y	N
NID1	nidogen-1 [Canis lupus familiaris]	20	203000000	35100000	Y	N
ENO1	alpha-enolase [Canis lupus familiaris]	21	199000000	93500000	Y	Y
SERPINE2	glia-derived nexin [Canis lupus familiaris]	22	185000000	13300000	N	N
TF; LOC477072	serotransferrin [Canis lupus familiaris]	24	164000000	42300000	Y	Y
SERPINE1	plasminogen activator inhibitor 1 precursor [Canis lupus familiaris]	26	152000000	14700000	Y	N
C3	complement C3 [Canis lupus familiaris]	32	121000000	22700000	Y	Y
LOC100856539; F2	prothrombin [Canis lupus familiaris]	33	96400000	1780000	Y	N
SERPINI1	neuroserpin isoform X1 [Canis lupus familiaris]	35	79800000	7090000	N	N
ALB	serum albumin isoform X1 [Canis lupus familiaris]	36	77600000	24700000	Y	Y
TGFB1	transforming growth factor beta-1 precursor [Canis lupus familiaris]	39	71400000	8680000	Y	Y
RSU1	ras suppressor protein 1 isoform X1 [Canis lupus familiaris]	40	71400000	33700000	Y	N
PROS1	vitamin K-dependent protein S [Canis lupus familiaris]	41	69400000	7760000	Y	Y
ARHGDIA	rho GDP-dissociation inhibitor 1 [Canis lupus familiaris]	47	60300000	26700000	Y	N
TIMP2	metalloproteinase inhibitor 2 precursor [Canis lupus familiaris]	55	45200000	3820000	N	N
RAP1B	ras-related protein Rap-1b [Canis lupus familiaris]	56	43400000	17900000	Y	N
CA2	carbonic anhydrase 2 [Canis lupus familiaris]	57	42700000	27000000	Y	N
FBLN2	fibulin-2 isoform X1 [Canis lupus familiaris]	58	42200000	11600000	N	N
MMRN1	multimerin-1 isoform X1 [Canis lupus familiaris]	59	41600000	8170000	Y	Y
PGD	6-phosphogluconate dehydrogenase, decarboxylating [Canis lupus familiaris]	66	35500000	18500000	N	N
NME2	nucleoside diphosphate kinase B [Canis lupus familiaris]	70	33900000	18900000	Y	N
CAPZA1	F-actin-capping protein subunit alpha-1 [Canis lupus familiaris]	72	33100000	16900000	Y	N
LIMS1	LIM and senescent cell antigen-like-containing domain protein 1 isoform X2 [Canis lupus familiaris]	73	33100000	13300000	Y	N
EMILIN1	EMILIN-1, partial [Canis lupus familiaris]	75	31200000	9980000	Y	N
SERPINA1	alpha-1-antitrypsin isoform X1 [Canis lupus familiaris]	76	30300000	5080000	Y	Y
KNG1	kininogen-1 isoform X2 [Canis lupus familiaris]	77	30000000	4500000	Y	Y
ECM1	extracellular matrix protein 1 [Canis lupus familiaris]	78	28400000	3570000	y	Y
PRSS57	serine protease 57 [Canis lupus familiaris]	79	28300000	2660000	N	N
GSR	glutathione reductase, mitochondrial isoform X1 [Canis lupus familiaris]	83	26900000	13300000	Y	N
PLG	plasminogen precursor [Canis lupus familiaris]	84	25600000	3500000	Y	Y
SERPINF2	alpha-2-antiplasmin isoform X2 [Canis lupus familiaris]	85	25500000	3650000	N	N
GDI2	rab GDP dissociation inhibitor beta [Canis lupus familiaris]	87	23500000	10200000	Y	N
B2M	beta-2-microglobulin isoform X1 [Canis lupus familiaris]	89	22400000	3020000	Y	N
GC	vitamin D-binding protein [Canis lupus familiaris]	94	20800000	2870000	Y	Y
C4A; LOC481722	complement C4-A [Canis lupus familiaris]	105	18400000	3140000	Y	N
ANXA11	annexin A11 [Canis lupus familiaris]	109	17400000	6500000	N	N
CEACAM21; LOC491477	carcinoembryonic antigen-related cell adhesion molecule 21 [Canis lupus familiaris]	114	16600000	2600000	N	N
SELP	P-selectin isoform X1 [Canis lupus familiaris]	116	16100000	3910000	Y	N
SEPT6	septin-6 isoform X1 [Canis lupus familiaris]	123	14500000	6740000	N	N
PA2G4	proliferation-associated protein 2G4 isoform X2 [Canis lupus familiaris]	125	13900000	5770000	N	N
IDH1	isocitrate dehydrogenase [NADP] cytoplasmic [Canis lupus familiaris]	126	13700000	6330000	N	N
LOC607368	immunoglobulin lambda-1 light chain isoform X16 [Canis lupus familiaris]	127	13400000	2110000	N	N
PAFAH1B1	platelet-activating factor acetylhydrolase IB subunit alpha [Canis lupus familiaris]	134	12100000	5100000	N	N
LTBP1	latent-transforming growth factor beta-binding protein 1 isoform X1 [Canis lupus familiaris]	138	11000000	1660000	Y	Y
LOC100683193; HRG	histidine-rich glycoprotein isoform X1 [Canis lupus familiaris]	140	10800000	3340000	Y	N
RAC1	ras-related C3 botulinum toxin substrate 1 precursor [Canis lupus familiaris]	142	10400000	3720000	N	N
CAP1	adenylyl cyclase-associated protein 1 isoform X1 [Canis lupus familiaris]	146	9860000	4760000	Y	N
VTN	vitronectin [Canis lupus familiaris]	148	9680000	831000	Y	N
HPSE	heparanase [Canis lupus familiaris]	149	9670000	968000	Y	N
ARPC5	actin-related protein 2/3 complex subunit 5 [Canis lupus familiaris]	154	8960000	3750000	Y	N
CAPN1	calpain-1 catalytic subunit [Canis lupus familiaris]	157	8850000	3920000	N	N
CAPZA2	F-actin-capping protein subunit alpha-2 [Canis lupus familiaris]	158	8800000	4260000	N	N
ALDH9A1	4-trimethylaminobutyraldehyde dehydrogenase [Canis lupus familiaris]	159	8770000	4730000	N	N
FHL1	four and a half LIM domains protein 1 isoform X3 [Canis lupus familiaris]	161	8650000	4440000	Y	N
DLA88	MHC class I DLA-88 precursor [Canis lupus familiaris]	162	8600000	3910000	N	N
IL8; CXCL8	interleukin-8 precursor [Canis lupus familiaris]	169	8100000	816000	N	N
SRGN	serglycin [Canis lupus familiaris]	173	7660000	1990000	Y	N
DOK2	docking protein 2 [Canis lupus familiaris]	175	7580000	1460000	N	N
SEPT2	septin-2 [Canis lupus familiaris]	177	7470000	3820000	N	N
GNAI2	guanine nucleotide-binding protein G(i) subunit alpha-2 [Canis lupus familiaris]	178	7370000	3690000	N	N
LOC100856570, GART	trifunctional purine biosynthetic protein adenosine-3 [Canis lupus familiaris]	181	7140000	3470000	N	N
LOXL3	lysyl oxidase homolog 3 isoform X1 [Canis lupus familiaris]	186	6830000	986000	Y	N
FBLN1	fibulin-1 isoform X2 [Canis lupus familiaris]	198	6140000	936000	N	N
LY6G6F	lymphocyte antigen 6 complex locus protein G6f isoform X1 [Canis lupus familiaris]	206	5660000	1470000	N	N
SEPT7	septin-7 isoform X1 [Canis lupus familiaris]	213	5150000	2450000	Y	N
SHMT1	serine hydroxymethyltransferase, cytosolic [Canis lupus familiaris]	214	5100000	2220000	N	N
NAP1L4	nucleosome assembly protein 1-like 4 isoform X1 [Canis lupus familiaris]	221	4800000	2060000	N	N
GPX3	glutathione peroxidase 3 precursor [Canis lupus familiaris]	229	4410000	446000	N	N
RAB7A	ras-related protein Rab-7a [Canis lupus familiaris]	235	4230000	1190000	Y	N
MAPK1	mitogen-activated protein kinase 1 [Canis lupus familiaris]	242	4050000	2240000	N	N
CP	ceruloplasmin isoform X1 [Canis lupus familiaris]	253	3720000	295000	Y	Y
GUSB	beta-glucuronidase precursor [Canis lupus familiaris]	260	3540000	381000	N	N
PRKAR2B	cAMP-dependent protein kinase type II-beta regulatory subunit isoform X1 [Canis lupus familiaris]	262	3430000	924000	N	N
LOC102156614; CTSV; CTSL2; CTSL	cathepsin L1 [Canis lupus familiaris]	264	3390000	277000	N	N
RAB27A	ras-related protein Rab-27A [Canis lupus familiaris]	265	3350000	1330000	N	N
DPP7	dipeptidyl peptidase 2 [Canis lupus familiaris]	270	3250000	176000	N	N
GNB1	guanine nucleotide-binding protein G(I)/G(S)/G(T) subunit beta-1 isoform X1 [Canis lupus familiaris]	281	2960000	759000	N	N
PLTP	phospholipid transfer protein [Canis lupus familiaris]	287	2880000	190000	N	N
VWF	von Willebrand factor isoform X1 [Canis lupus familiaris]	288	2830000	419000	Y	Y
HARS	histidine--tRNA ligase, cytoplasmic isoform X1 [Canis lupus familiaris]	297	2690000	1640000	N	N
F5	coagulation factor V [Canis lupus familiaris]	298	2670000	460000	y	Y
HEXB	beta-hexosaminidase subunit beta [Canis lupus familiaris]	308	2390000	258000	N	N
EFHD2	EF-hand domain-containing protein D2 [Canis lupus familiaris]	313	2310000	915000	N	N
NRP1	neuropilin-1 isoform X2 [Canis lupus familiaris]	317	2260000	678000	N	N
CFH; LOC478952	complement factor H [Canis lupus familiaris]	322	2230000	184000	Y	Y
DARS	aspartate--tRNA ligase, cytoplasmic isoform X1 [Canis lupus familiaris]	324	2210000	919000	N	N
BTK	tyrosine-protein kinase BTK [Canis lupus familiaris]	339	2060000	769000	N	N
F11R	junctional adhesion molecule A [Canis lupus familiaris]	351	1860000	771000	N	N
RHOA	transforming protein RhoA isoform X1 [Canis lupus familiaris]	353	1850000	698000	N	N
C5	complement C5 [Canis lupus familiaris]	358	1780000	242000	Y	N
PDLIM5	PDZ and LIM domain protein 5 isoform X1 [Canis lupus familiaris]	360	1760000	697000	N	N
CDC42	cell division control protein 42 homolog precursor [Canis lupus familiaris]	361	1740000	657000	N	N
NAPA	alpha-soluble NSF attachment protein isoform X1 [Canis lupus familiaris]	372	1610000	515000	N	N
AP1B1	AP-1 complex subunit beta-1 isoform X1 [Canis lupus familiaris]	385	1480000	545000	N	N
SEPP1; SELENOP	selenoprotein P precursor [Canis lupus familiaris]	393	1400000	184000	N	N
RNASE4	ribonuclease 4 isoform X1 [Canis lupus familiaris]	397	1380000	353000	N	N
PIP4K2A	phosphatidylinositol 5-phosphate 4-kinase type-2 alpha [Canis lupus familiaris]	400	1360000	447000	N	N
PRKACB; LOC479975	cAMP-dependent protein kinase catalytic subunit beta isoform X1 [Canis lupus familiaris]	402	1340000	409000	N	N
CAPNS1	calpain small subunit 1 isoform X1 [Canis lupus familiaris]	405	1300000	471000	N	N
PLOD3	procollagen-lysine,2-oxoglutarate 5-dioxygenase 3 [Canis lupus familiaris]	409	1280000	214000	N	N
RASGRP2	RAS guanyl-releasing protein 2 isoform X1 [Canis lupus familiaris]	421	1200000	551000	N	N
MFAP4	microfibril-associated glycoprotein 4 [Canis lupus familiaris]	423	1180000	39400	N	N
ATP6V1B2	V-type proton ATPase subunit B, brain isoform [Canis lupus familiaris]	440	1070000	406000	N	N
CYR61	protein CYR61 isoform X1 [Canis lupus familiaris]	445	1050000	75700	N	N
PSTPIP1	proline-serine-threonine phosphatase-interacting protein 1 [Canis lupus familiaris]	450	1010000	376000	N	N
VPS29	vacuolar protein sorting-associated protein 29 isoform 1 [Canis lupus familiaris]	453	999000	454000	N	N
SERPINA4	kallistatin [Canis lupus familiaris]	461	948000	107000	N	N
MICAL1	F-actin-methionine sulfoxide oxidase MICAL1, partial [Canis lupus familiaris]	472	881000	416000	N	N
STK24	serine/threonine-protein kinase 24 [Canis lupus familiaris]	473	867000	294000	N	N
HNRNPK	heterogeneous nuclear ribonucleoprotein K [Canis lupus familiaris]	476	864000	249000	N	N
GNB5	guanine nucleotide-binding protein subunit beta-5 [Canis lupus familiaris]	483	836000	333000	N	N
UGP2	UTP--glucose-1-phosphate uridylyltransferase isoform X1 [Canis lupus familiaris]	487	810000	378000	N	N
AP1S1	AP-1 complex subunit sigma-1A [Canis lupus familiaris]	490	775000	297000	N	N
MST4; STK26	serine/threonine-protein kinase 26 isoform X1 [Canis lupus familiaris]	491	772000	205000	N	N
KRT10	keratin, type I cytoskeletal 10 isoform X1 [Canis lupus familiaris]	495	764000	268000	N	N
RAB8A	ras-related protein Rab-8A [Canis lupus familiaris]	504	720000	297000	N	N
STX7; LOC483987	syntaxin-7 isoform X1 [Canis lupus familiaris]	513	658000	287000	N	N
TPP1	tripeptidyl-peptidase 1 precursor [Canis lupus familiaris]	520	617000	48600	Y	N
LANCL1	lanC-like protein 1 [Canis lupus familiaris]	528	587000	316000	N	N
PSME1	proteasome activator complex subunit 1 [Canis lupus familiaris]	532	576000	203000	N	N
VPS25	vacuolar protein-sorting-associated protein 25 [Canis lupus familiaris]	533	576000	175000	N	N
COPS8	COP9 signalosome complex subunit 8 [Canis lupus familiaris]	548	525000	182000	N	N
PLXNB3	plexin-B3 [Canis lupus familiaris]	552	505000	172000	N	N
RAB2A	ras-related protein Rab-2A [Canis lupus familiaris]	556	497000	165000	N	N
PPT1	palmitoyl-protein thioesterase 1 precursor [Canis lupus familiaris]	589	396000	ID only	N	N
PFDN5	prefoldin subunit 5 [Canis lupus familiaris]	607	322000	133000	N	N
DCTN3	dynactin subunit 3 isoform X1 [Canis lupus familiaris]	609	319000	126000	N	N
ECHS1	enoyl-CoA hydratase, mitochondrial [Canis lupus familiaris]	612	313000	143000	N	N
EIF2S3	eukaryotic translation initiation factor 2 subunit 3 [Canis lupus familiaris]	618	291000	123000	N	N
SRI	sorcin isoform X1 [Canis lupus familiaris]	621	281000	99300	N	N
MAPKAPK3	MAP kinase-activated protein kinase 3 [Canis lupus familiaris]	626	269000	121000	N	N
PTP4A1	protein tyrosine phosphatase type IVA 1 [Canis lupus familiaris]	631	251000	56700	N	N
LOC100855712; C8A	complement component C8 alpha chain isoform X1 [Canis lupus familiaris]	648	197000	ID only	Y	N
CLASP1	CLIP-associating protein 1 isoform X1 [Canis lupus familiaris]	661	160000	29900	N	N
CSNK2B	casein kinase II subunit beta isoform X1 [Canis lupus familiaris]	684	105000	ID only	N	N
CAPS proteins unique to the soluble fraction (n = 360)
GSN	gelsolin [Canis lupus familiaris]	7	881000000	424000000	Y	N
LOC607397; PFN1	profilin-1 [Canis lupus familiaris]	10	661000000	304000000	Y	Y
TUBB4B; LOC102153202	tubulin beta-4B chain isoform X2 [Canis lupus familiaris]	12	448000000	185000000	N	N
CFL1	cofilin-1 [Canis lupus familiaris]	13	446000000	194000000	Y	Y
TUBA4A	tubulin alpha-4A chain isoform X1 [Canis lupus familiaris]	14	420000000	223000000	Y	Y
PPIA	peptidyl-prolyl cis-trans isomerase A [Canis lupus familiaris]	15	286000000	137000000	Y	Y
TUBB1	tubulin beta-1 chain isoform X1 [Canis lupus familiaris]	17	254000000	128000000	Y	Y
PGK1	phosphoglycerate kinase 1 [Canis lupus familiaris]	19	214000000	110000000	Y	N
ACTC1	actin, alpha cardiac muscle 1 [Canis lupus familiaris]	25	153000000	46700000	N	N
CAP1	adenylyl cyclase-associated protein 1 isoform X2 [Canis lupus familiaris]	27	141000000	76000000	Y	N
TAGLN2	transgelin-2 [Canis lupus familiaris]	28	138000000	43300000	Y	N
GSTP1	glutathione S-transferase pi 1 [Canis lupus familiaris]	34	95500000	53900000	Y	N
NT5C3; NT5C3A	cytosolic 5'-nucleotidase 3A isoform X1 [Canis lupus familiaris]	37	74000000	37100000	N	N
CA1	carbonic anhydrase 1 [Canis lupus familiaris]	38	72200000	30800000	N	N
MTPN	myotrophin [Canis lupus familiaris]	42	68700000	28400000	Y	N
TUBB	tubulin beta chain [Canis lupus familiaris]	43	67000000	26500000	Y	N
CORO1B; LOC476007	coronin-1B [Canis lupus familiaris]	44	66300000	28900000	N	N
ILK	integrin-linked protein kinase [Canis lupus familiaris]	46	61900000	27500000	Y	N
PPIB	peptidyl-prolyl cis-trans isomerase B [Canis lupus familiaris]	49	54300000	25200000	Y	N
HP; LOC479668	haptoglobin-like [Canis lupus familiaris]	50	52800000	14700000	Y	Y
VASP	vasodilator-stimulated phosphoprotein isoform X1 [Canis lupus familiaris]	52	52200000	15500000	Y	N
LOC100856470; PRDX2	peroxiredoxin-2 isoform X1 [Canis lupus familiaris]	54	46500000	18200000	N	N
TWF2; TLR9	twinfilin-2 [Canis lupus familiaris]	60	40700000	18000000	N	N
SERPINC1	antithrombin-III [Canis lupus familiaris]	61	38000000	7350000	Y	Y
PRDX1	peroxiredoxin-1 isoform X1 [Canis lupus familiaris]	62	37700000	14200000	Y	N
LOC477071; TF	serotransferrin isoform X1 [Canis lupus familiaris]	63	36300000	6070000	Y	Y
CORO1C	coronin-1C [Canis lupus familiaris]	67	35500000	14400000	Y	N
SH3BGRL2; LOC474977	SH3 domain-binding glutamic acid-rich-like protein 2 [Canis lupus familiaris]	68	35300000	15400000	N	N
TTR	transthyretin [Canis lupus familiaris]	69	34700000	5050000	Y	N
TWF1	twinfilin-1 [Canis lupus familiaris]	71	33700000	13300000	N	N
EHD3	EH domain-containing protein 3 [Canis lupus familiaris]	74	32900000	11400000	Y	N
ACTBL2	beta-actin-like protein 2 [Canis lupus familiaris]	80	28200000	12800000	N	Y
DYNLL2	dynein light chain 2, cytoplasmic isoform X1 [Canis lupus familiaris]	81	27200000	9820000	N	N
EEF1G	elongation factor 1-gamma [Canis lupus familiaris]	82	27200000	9690000	N	N
RPS27A	ubiquitin-40S ribosomal protein S27a [Canis lupus familiaris]	86	23800000	8670000	N	N
MAPRE1	microtubule-associated protein RP/EB family member 1 [Canis lupus familiaris]	88	23300000	10300000	Y	N
PEBP1	phosphatidylethanolamine-binding protein 1 [Canis lupus familiaris]	90	22200000	9830000	N	N
AK1	adenylate kinase isoenzyme 1 [Canis lupus familiaris]	91	21100000	7620000	N	N
DCXR	L-xylulose reductase [Canis lupus familiaris]	92	21000000	9910000	N	N
CD44	CD44 antigen isoform X1 [Canis lupus familiaris]	93	21000000	7640000	N	N
EIF5A	eukaryotic translation initiation factor 5A-1 [Canis lupus familiaris]	95	20300000	7740000	Y	N
SERPINF1	pigment epithelium-derived factor isoform X1 [Canis lupus familiaris]	96	20100000	1550000	Y	N
LOC474798	thioredoxin-like isoform X1 [Canis lupus familiaris]	97	20100000	8390000	Y	N
MYL12A; LOC607207	myosin regulatory light polypeptide 9 isoform X1 [Canis lupus familiaris]	98	19400000	7120000	y	N
AKR1B1	aldose reductase [Canis lupus familiaris]	99	19400000	8940000	N	N
ARRB1	beta-arrestin-1 isoform X2 [Canis lupus familiaris]	100	19300000	7700000	N	N
AHSG	alpha-2-HS-glycoprotein [Canis lupus familiaris]	101	18900000	5950000	Y	Y
EIF4A1	eukaryotic initiation factor 4A-I [Canis lupus familiaris]	102	18800000	7160000	N	N
CAPG	macrophage-capping protein isoform X1 [Canis lupus familiaris]	103	18700000	9460000	N	N
PPIC	peptidyl-prolyl cis-trans isomerase C isoform X1 [Canis lupus familiaris]	104	18600000	4080000	N	N
PDLIM1	PDZ and LIM domain protein 1 [Canis lupus familiaris]	107	17900000	7710000	Y	Y
PDIA6	protein disulfide-isomerase A6 [Canis lupus familiaris]	108	17500000	9210000	Y	N
RAB11A	ras-related protein Rab-11A [Canis lupus familiaris]	110	17400000	6180000	N	N
PDE5A	cGMP-specific 3',5'-cyclic phosphodiesterase isoform X1 [Canis lupus familiaris]	111	17200000	9370000	N	N
RAB14	ras-related protein Rab-14 [Canis lupus familiaris]	112	17200000	5570000	N	N
LOC481389; LGALSL	galectin-related protein [Canis lupus familiaris]	113	16700000	4280000	Y	N
ARHGAP1	rho GTPase-activating protein 1 isoform X1 [Canis lupus familiaris]	117	16100000	5140000	N	N
A1BG; ZNF837	alpha-1B-glycoprotein [Canis lupus familiaris]	119	15900000	2540000	Y	Y
APOA1	apolipoprotein A-I [Canis lupus familiaris]	120	15800000	6330000	Y	Y
NAP1L1	nucleosome assembly protein 1-like 1 isoform X1 [Canis lupus familiaris]	121	15800000	4790000	Y	N
SRC	proto-oncogene tyrosine-protein kinase Src isoform X1 [Canis lupus familiaris]	122	15700000	5960000	Y	N
FETUB	fetuin-B [Canis lupus familiaris]	128	13200000	2970000	N	N
PGLS	6-phosphogluconolactonase [Canis lupus familiaris]	130	12400000	5070000	N	N
NRCAM	neuronal cell adhesion molecule isoform X1 [Canis lupus familiaris]	131	12400000	3570000	N	N
GLO1	lactoylglutathione lyase [Canis lupus familiaris]	132	12300000	5450000	N	N
HPX	hemopexin [Canis lupus familiaris]	135	11900000	2850000	Y	Y
ATG2B	autophagy-related protein 2 homolog B isoform X1 [Canis lupus familiaris]	136	11700000	1450000	N	N
GSS	glutathione synthetase isoform X1 [Canis lupus familiaris]	137	11600000	5250000	N	N
LOC607368	immunoglobulin lambda-1 light chain isoform X44 [Canis lupus familiaris]	139	11000000	1860000	N	N
NT5C3L; NT5C3B	7-methylguanosine phosphate-specific 5'-nucleotidase isoform X1 [Canis lupus familiaris]	141	10700000	4030000	N	N
HPRT1	hypoxanthine-guanine phosphoribosyltransferase isoform 1 [Canis lupus familiaris]	143	10400000	4460000	N	N
APOH	beta-2-glycoprotein 1 precursor [Canis lupus familiaris]	144	10400000	404000	Y	Y
IMPA1	inositol monophosphatase 1 isoform X1 [Canis lupus familiaris]	145	10200000	4720000	N	N
CAB39L	calcium-binding protein 39-like [Canis lupus familiaris]	147	9850000	3640000	N	N
BLVRB	flavin reductase (NADPH) isoform X1 [Canis lupus familiaris]	150	9550000	3060000	N	N
LOC607874	cystatin-C-like [Canis lupus familiaris]	151	9120000	495000	N	N
MYL9	myosin regulatory light polypeptide 9 [Canis lupus familiaris]	153	8970000	3920000	Y	N
LOC478495; UBE2D3	ubiquitin-conjugating enzyme E2 D3 [Canis lupus familiaris]	155	8930000	2540000	N	N
NANS	sialic acid synthase [Canis lupus familiaris]	156	8920000	5500000	N	N
CLSTN1; LOC479600	calsyntenin-1 isoform X2 [Canis lupus familiaris]	160	8680000	662000	Y	N
COTL1	coactosin-like protein, partial [Canis lupus familiaris]	163	8570000	3770000	Y	N
UNC13D	protein unc-13 homolog D isoform X1 [Canis lupus familiaris]	164	8420000	803000	N	N
LAP3	cytosol aminopeptidase [Canis lupus familiaris]	165	8360000	3740000	N	N
GLA	alpha-galactosidase A [Canis lupus familiaris]	166	8330000	707000	N	N
AGT	angiotensinogen [Canis lupus familiaris]	167	8190000	872000	Y	N
GRB2	growth factor receptor-bound protein 2 [Canis lupus familiaris]	170	7890000	4050000	Y	N
UROS	uroporphyrinogen-III synthase isoform X1 [Canis lupus familiaris]	171	7840000	4360000	N	N
TPT1	translationally-controlled tumor protein [Canis lupus familiaris]	172	7810000	3230000	Y	N
GP6	platelet glycoprotein VI isoform X1 [Canis lupus familiaris]	176	7540000	1940000	Y	N
RBP4	retinol-binding protein 4 [Canis lupus familiaris]	180	7170000	517000	N	N
TAGLN	transgelin [Canis lupus familiaris]	182	6990000	1900000	N	N
IL18	interleukin-18 isoform X1 [Canis lupus familiaris]	183	6990000	2190000	N	N
CAB39	calcium-binding protein 39 [Canis lupus familiaris]	184	6960000	3000000	N	N
LGALS1	galectin-1 [Canis lupus familiaris]	187	6820000	1800000	N	N
ADK	adenosine kinase isoform X1 [Canis lupus familiaris]	188	6770000	2910000	N	N
PRDX5	peroxiredoxin-5, mitochondrial [Canis lupus familiaris]	189	6740000	2010000	N	N
CMPK1	UMP-CMP kinase isoform X1 [Canis lupus familiaris]	192	6550000	2470000	N	N
LOC476006	glutathione S-transferase P-like [Canis lupus familiaris]	193	6510000	3060000	Y	N
RNH1	ribonuclease inhibitor [Canis lupus familiaris]	194	6490000	2470000	N	N
GLRX	glutaredoxin-1 [Canis lupus familiaris]	195	6420000	2620000	N	N
PPM1F	protein phosphatase 1F [Canis lupus familiaris]	196	6390000	2270000	N	N
CASP6	caspase-6 [Canis lupus familiaris]	197	6170000	2780000	N	N
RAN	GTP-binding nuclear protein Ran [Canis lupus familiaris]	199	6070000	932000	N	N
LOC100855747; MANF	mesencephalic astrocyte-derived neurotrophic factor [Canis lupus familiaris]	200	5950000	2320000	Y	N
CNN2	calponin-2 [Canis lupus familiaris]	201	5900000	1760000	N	N
AKR1E2	1,5-anhydro-D-fructose reductase [Canis lupus familiaris]	202	5890000	2860000	N	N
TXNL1	thioredoxin-like protein 1 [Canis lupus familiaris]	203	5880000	2490000	N	N
TBCB	tubulin-folding cofactor B isoform X1 [Canis lupus familiaris]	208	5500000	2540000	N	N
MAPK14	mitogen-activated protein kinase 14 [Canis lupus familiaris]	209	5490000	2500000	N	N
MYLK	myosin light chain kinase, smooth muscle isoform X1 [Canis lupus familiaris]	211	5260000	2200000	N	N
EPDR1	mammalian ependymin-related protein 1 [Canis lupus familiaris]	212	5180000	182000	N	N
LOC100856436; GGH	gamma-glutamyl hydrolase [Canis lupus familiaris]	216	5080000	804000	Y	N
CFB	complement factor B [Canis lupus familiaris]	217	4990000	802000	Y	N
LOC475852; S100A11	protein S100-A11 [Canis lupus familiaris]	218	4960000	2190000	N	N
STRAP	serine-threonine kinase receptor-associated protein isoform X1 [Canis lupus familiaris]	219	4950000	2670000	N	N
OLA1	obg-like ATPase 1 [Canis lupus familiaris]	220	4910000	1820000	N	N
DBI	acyl-CoA-binding protein isoform X1 [Canis lupus familiaris]	223	4720000	2270000	N	N
-	40S ribosomal protein SA isoform X1 [Canis lupus familiaris]	224	4700000	2410000	N	N
GMFG	glia maturation factor gamma isoform X2 [Canis lupus familiaris]	225	4560000	1740000	Y	N
ITIH1; LOC476590	inter-alpha-trypsin inhibitor heavy chain H1 isoform X1 [Canis lupus familiaris]	227	4420000	699000	Y	N
PCBP1	poly(rC)-binding protein 1 [Canis lupus familiaris]	230	4400000	1210000	N	N
ABRACL	costars family protein ABRACL [Canis lupus familiaris]	238	4210000	1300000	N	N
CAND1	cullin-associated NEDD8-dissociated protein 1 [Canis lupus familiaris]	240	4170000	2030000	N	N
UBE2D2	ubiquitin-conjugating enzyme E2 D2 isoform X2 [Canis lupus familiaris]	241	4100000	948000	N	N
CYB5R3	NADH-cytochrome b5 reductase 3 [Canis lupus familiaris]	243	4020000	3100000	N	N
RAB1B	ras-related protein Rab-1B isoform X1 [Canis lupus familiaris]	244	4000000	1020000	N	N
CTSZ	cathepsin Z [Canis lupus familiaris]	245	3950000	247000	N	N
DAK; TKFC	triokinase/FMN cyclase isoform X1 [Canis lupus familiaris]	246	3930000	1570000	N	N
SKAP2	src kinase-associated phosphoprotein 2 isoform X1 [Canis lupus familiaris]	247	3900000	816000	N	N
CDC37	hsp90 co-chaperone Cdc37 [Canis lupus familiaris]	248	3820000	1650000	N	N
UBE2V2	ubiquitin-conjugating enzyme E2 variant 2 isoform X1 [Canis lupus familiaris]	249	3810000	1410000	N	N
PSMD5	26S proteasome non-ATPase regulatory subunit 5, partial [Canis lupus familiaris]	250	3800000	858000	N	N
TMOD3	tropomodulin-3 [Canis lupus familiaris]	251	3780000	1450000	N	N
CFI	complement factor I isoform X3 [Canis lupus familiaris]	254	3720000	447000	N	N
FKBP4	peptidyl-prolyl cis-trans isomerase FKBP4 isoform X1 [Canis lupus familiaris]	255	3650000	1380000	N	N
GNS	N-acetylglucosamine-6-sulfatase [Canis lupus familiaris]	256	3640000	386000	N	N
LOC100855540, HBA1	hemoglobin subunit alpha-like [Canis lupus familiaris]	257	3630000	1710000	Y	Y
BID	BH3-interacting domain death agonist [Canis lupus familiaris]	258	3570000	1120000	N	N
LYN	tyrosine-protein kinase Lyn isoform X1 [Canis lupus familiaris]	259	3560000	1180000	N	N
SIRT5	NAD-dependent protein deacylase sirtuin-5, mitochondrial [Canis lupus familiaris]	263	3400000	1580000	N	N
LOC100855636; OTUB1	ubiquitin thioesterase OTUB1 isoform X1 [Canis lupus familiaris]	266	3330000	1080000	N	N
HAGH	hydroxyacylglutathione hydrolase, mitochondrial isoform X1 [Canis lupus familiaris]	268	3280000	1680000	N	N
CRK	adapter molecule crk isoform X1 [Canis lupus familiaris]	269	3280000	1440000	N	N
LYZ	lysozyme C precursor [Canis lupus familiaris]	271	3250000	725000	Y	Y
ARHGAP18	rho GTPase-activating protein 18 [Canis lupus familiaris]	272	3250000	1240000	N	N
RAB1A	ras-related protein Rab-1A [Canis lupus familiaris]	273	3230000	1110000	N	N
LOC100855698; PPP1R7	protein phosphatase 1 regulatory subunit 7 isoform X1 [Canis lupus familiaris]	274	3170000	1130000	N	N
GMPPB	mannose-1-phosphate guanyltransferase beta [Canis lupus familiaris]	275	3170000	3400000	N	N
CTSD	cathepsin D precursor [Canis lupus familiaris]	276	3090000	289000	Y	N
UCHL3	ubiquitin carboxyl-terminal hydrolase isozyme L3 isoform X2 [Canis lupus familiaris]	277	3080000	1490000	N	N
PCMT1	protein-L-isoaspartate(D-aspartate) O-methyltransferase isoform X1 [Canis lupus familiaris]	278	3070000	751000	N	N
ST13	hsc70-interacting protein [Canis lupus familiaris]	280	2980000	1360000	N	N
LXN	latexin [Canis lupus familiaris]	282	2960000	1260000	N	N
TUBB3	tubulin beta-3 chain [Canis lupus familiaris]	283	2950000	285000	N	N
APRT	adenine phosphoribosyltransferase isoform X1 [Canis lupus familiaris]	284	2930000	912000	N	N
FYB; FYB1	FYN-binding protein [Canis lupus familiaris]	285	2910000	657000	N	N
UBE2V1	ubiquitin-conjugating enzyme E2 variant 1 [Canis lupus familiaris]	286	2900000	981000	N	N
BAX	apoptosis regulator BAX [Canis lupus familiaris]	294	2750000	1050000	N	N
ABHD14B	protein ABHD14B [Canis lupus familiaris]	295	2740000	1280000	N	N
BZW1	basic leucine zipper and W2 domain-containing protein 1 isoform X1 [Canis lupus familiaris]	300	2650000	625000	N	N
PPP2CA	serine/threonine-protein phosphatase 2A catalytic subunit alpha isoform [Canis lupus familiaris]	301	2630000	943000	N	N
LOC606814; ACP1	low molecular weight phosphotyrosine protein phosphatase [Canis lupus familiaris]	302	2610000	1220000	N	N
AGA	N(4)-(beta-N-acetylglucosaminyl)-L-asparaginase [Canis lupus familiaris]	303	2610000	184000	N	N
CRKL	crk-like protein [Canis lupus familiaris]	304	2600000	1270000	Y	N
OSTF1	osteoclast-stimulating factor 1 [Canis lupus familiaris]	305	2550000	1010000	N	N
PDCD10	programmed cell death protein 10 [Canis lupus familiaris]	307	2480000	831000	N	N
SERPINA5; LOC480424	plasma serine protease inhibitor [Canis lupus familiaris]	310	2330000	205000	N	N
HRSP12; RIDA	2-iminobutanoate/2-iminopropanoate deaminase isoform X1 [Canis lupus familiaris]	311	2320000	1050000	N	N
LCP2	lymphocyte cytosolic protein 2 [Canis lupus familiaris]	315	2290000	204000	N	N
RAP1GDS1	rap1 GTPase-GDP dissociation stimulator 1 [Canis lupus familiaris]	319	2250000	941000	N	N
SERPINA3; LOC480425	alpha-1-antichymotrypsin [Canis lupus familiaris]	320	2250000	440000	Y	N
SELENBP1	selenium-binding protein 1 [Canis lupus familiaris]	321	2240000	995000	N	N
LOC100856347; PYCARD	apoptosis-associated speck-like protein containing a CARD isoform X1 [Canis lupus familiaris]	323	2220000	833000	N	N
IPO5	importin-5 [Canis lupus familiaris]	325	2210000	936000	N	N
CHI3L1	chitinase-3-like protein 1 precursor [Canis lupus familiaris]	326	2210000	248000	N	N
TPK1	thiamin pyrophosphokinase 1 isoform X1 [Canis lupus familiaris]	327	2190000	962000	N	N
GLRX3	glutaredoxin-3 isoform X1 [Canis lupus familiaris]	328	2180000	1270000	N	N
EIF4A2	eukaryotic initiation factor 4A-II [Canis lupus familiaris]	329	2160000	847000	N	N
CACYBP	calcyclin-binding protein isoform X1 [Canis lupus familiaris]	330	2160000	783000	N	N
PHPT1	14 kDa phosphohistidine phosphatase isoform X2 [Canis lupus familiaris]	331	2150000	1020000	N	N
FABP5	fatty acid-binding protein, epidermal isoform X1 [Canis lupus familiaris]	332	2150000	425000	N	N
CNPY2; CS	protein canopy homolog 2 [Canis lupus familiaris]	335	2110000	996000	N	N
MAP2K1	dual specificity mitogen-activated protein kinase kinase 1 [Canis lupus familiaris]	336	2090000	362000	N	N
AFM	afamin [Canis lupus familiaris]	338	2080000	439000	Y	Y
PDCD6IP	programmed cell death 6-interacting protein isoform X1 [Canis lupus familiaris]	340	2040000	567000	N	N
PIP4K2B	phosphatidylinositol 5-phosphate 4-kinase type-2 beta isoform X1 [Canis lupus familiaris]	341	2020000	827000	N	N
PPP6C	serine/threonine-protein phosphatase 6 catalytic subunit isoform X1 [Canis lupus familiaris]	342	2000000	928000	N	N
FABP3	fatty acid-binding protein, heart [Canis lupus familiaris]	344	1960000	754000	N	N
DPEP2; LOC611083	dipeptidase 2 [Canis lupus familiaris]	346	1940000	660000	N	N
VAMP7	vesicle-associated membrane protein 7 isoform X1 [Canis lupus familiaris]	347	1940000	334000	N	N
PSME2	proteasome activator complex subunit 2 [Canis lupus familiaris]	352	1860000	553000	N	N
PPBP; LOC106557449	alveolar macrophage chemotactic factor-like [Canis lupus familiaris]	354	1850000	203000	N	N
HEXA	beta-hexosaminidase subunit alpha isoform X1 [Canis lupus familiaris]	355	1840000	107000	N	N
C7	complement component C7 isoform X1 [Canis lupus familiaris]	356	1790000	115000	N	N
DAPP1	dual adapter for phosphotyrosine and 3-phosphotyrosine and 3-phosphoinositide [Canis lupus familiaris]	359	1770000	667000	N	N
FBLN1	fibulin-1 isoform X1 [Canis lupus familiaris]	362	1740000	294000	N	N
GPX1	glutathione peroxidase 1 [Canis lupus familiaris]	363	1730000	628000	Y	N
SNX9	sorting nexin-9 isoform X1 [Canis lupus familiaris]	365	1720000	928000	N	N
ITIH2	inter-alpha-trypsin inhibitor heavy chain H2 [Canis lupus familiaris]	366	1710000	131000	Y	N
LOC607859; BOLA2B	bolA-like protein 2 isoform X1 [Canis lupus familiaris]	367	1690000	608000	N	N
FGD3	FYVE, RhoGEF and PH domain-containing protein 3 [Canis lupus familiaris]	368	1670000	519000	N	N
MLEC	malectin isoform X1 [Canis lupus familiaris]	369	1660000	680000	N	N
EIF4E	eukaryotic translation initiation factor 4E isoform X1 [Canis lupus familiaris]	370	1620000	609000	N	N
MAPRE2	microtubule-associated protein RP/EB family member 2 isoform X4 [Canis lupus familiaris]	373	1600000	479000	N	N
SIAE	sialate O-acetylesterase isoform X1 [Canis lupus familiaris]	374	1600000	50200	Y	N
PTPN6	tyrosine-protein phosphatase non-receptor type 6 isoform X1 [Canis lupus familiaris]	376	1570000	641000	N	N
EIF1AX; LOC611715	eukaryotic translation initiation factor 1A, X-chromosomal [Canis lupus familiaris]	377	1550000	550000	N	N
FN3KRP	ketosamine-3-kinase [Canis lupus familiaris]	378	1530000	892000	N	N
INF2; LOC102153864	inverted formin-2 [Canis lupus familiaris]	382	1500000	462000	N	N
ACTR1A	alpha-centractin [Canis lupus familiaris]	383	1500000	1030000	N	N
BROX	BRO1 domain-containing protein BROX [Canis lupus familiaris]	384	1490000	592000	N	N
RAB4A	ras-related protein Rab-4A isoform X1 [Canis lupus familiaris]	386	1480000	346000	N	N
NCK2	cytoplasmic protein NCK2 [Canis lupus familiaris]	387	1470000	279000	N	N
GALNT2	polypeptide N-acetylgalactosaminyltransferase 2 [Canis lupus familiaris]	390	1410000	182000	N	N
CD40LG	CD40 ligand [Canis lupus familiaris]	391	1410000	201000	N	N
CNDP2	cytosolic non-specific dipeptidase [Canis lupus familiaris]	394	1400000	610000	N	N
CD84	SLAM family member 5 isoform X1 [Canis lupus familiaris]	396	1390000	335000	Y	N
DOK3	docking protein 3 [Canis lupus familiaris]	398	1380000	175000	N	N
PTGES3	prostaglandin E synthase 3 [Canis lupus familiaris]	399	1370000	375000	N	N
PURA	transcriptional activator protein Pur-alpha [Canis lupus familiaris]	401	1350000	539000	N	N
TUBB6	tubulin beta-6 chain [Canis lupus familiaris]	403	1330000	519000	N	N
LRG1	leucine-rich alpha-2-glycoprotein [Canis lupus familiaris]	404	1320000	151000	N	N
CALU	calumenin isoform X1 [Canis lupus familiaris]	406	1290000	132000	Y	N
CAMK1	calcium/calmodulin-dependent protein kinase type 1 [Canis lupus familiaris]	407	1290000	528000	N	N
MAN2B1	lysosomal alpha-mannosidase isoform X1 [Canis lupus familiaris]	412	1270000	101000	N	N
FKBP3; LOC480306	peptidyl-prolyl cis-trans isomerase FKBP3 isoform X1 [Canis lupus familiaris]	415	1250000	476000	N	N
PFDN2	prefoldin subunit 2 [Canis lupus familiaris]	416	1250000	435000	N	N
NSFL1C	NSFL1 cofactor p47 isoform X1 [Canis lupus familiaris]	417	1250000	515000	N	N
FAM3C	protein FAM3C [Canis lupus familiaris]	418	1240000	147000	Y	N
CTSB	cathepsin B isoform X1 [Canis lupus familiaris]	419	1220000	112000	N	N
ETF1	eukaryotic peptide chain release factor subunit 1 isoform X1 [Canis lupus familiaris]	420	1230000	557000	N	N
FSCN1	fascin [Canis lupus familiaris]	422	1190000	498000	N	N
FKBP2	peptidyl-prolyl cis-trans isomerase FKBP2 isoform X1 [Canis lupus familiaris]	424	1180000	354000	N	N
NMRAL1	nmrA-like family domain-containing protein 1 isoform X1 [Canis lupus familiaris]	426	1150000	479000	N	N
FUCA1	tissue alpha-L-fucosidase precursor [Canis lupus familiaris]	427	1150000	138000	N	N
EIF6	eukaryotic translation initiation factor 6 isoform X1 [Canis lupus familiaris]	429	1130000	380000	N	N
PRKCB	protein kinase C beta type isoform X1 [Canis lupus familiaris]	430	1120000	304000	N	N
PIR	pirin isoform X1 [Canis lupus familiaris]	431	1110000	384000	N	N
PPP5C	serine/threonine-protein phosphatase 5 [Canis lupus familiaris]	432	1110000	520000	N	N
PRDX3	thioredoxin-dependent peroxide reductase, mitochondrial [Canis lupus familiaris]	433	1100000	561000	N	N
SH3GLB1	endophilin-B1 isoform X1 [Canis lupus familiaris]	434	1100000	370000	N	N
ITIH4	inter-alpha-trypsin inhibitor heavy chain H4 isoform X1 [Canis lupus familiaris]	435	1090000	34500	Y	N
EFNB1	ephrin-B1 [Canis lupus familiaris]	438	1080000	373000	N	N
ALDH2	aldehyde dehydrogenase, mitochondrial isoform X1 [Canis lupus familiaris]	446	1040000	396000	N	N
MAT2A	S-adenosylmethionine synthase [Canis lupus familiaris]	447	1030000	539000	N	N
AHSA1	activator of 90 kDa heat shock protein ATPase homolog 1 [Canis lupus familiaris]	449	1020000	376000	N	N
SYTL4	synaptotagmin-like protein 4 isoform X1 [Canis lupus familiaris]	451	1010000	289000	N	N
PLXDC2	plexin domain-containing protein 2 isoform X1 [Canis lupus familiaris]	456	981000	171000	Y	N
RGS18	regulator of G-protein signaling 18 [Canis lupus familiaris]	457	972000	248000	N	N
RGS10	regulator of G-protein signaling 10 isoform X1 [Canis lupus familiaris]	458	968000	292000	N	N
ATG3	ubiquitin-like-conjugating enzyme ATG3 [Canis lupus familiaris]	459	966000	401000	N	N
MAPK9	mitogen-activated protein kinase 9 isoform X1 [Canis lupus familiaris]	460	955000	473000	N	N
UMPS	uridine 5'-monophosphate synthase [Canis lupus familiaris]	462	943000	28900	N	N
HINT1	histidine triad nucleotide-binding protein 1 [Canis lupus familiaris]	464	941000	216000	N	N
GUCY1B3	guanylate cyclase soluble subunit beta-1 [Canis lupus familiaris]	465	921000	391000	N	N
TFPI	tissue factor pathway inhibitor [Canis lupus familiaris]	466	915000	88300	Y	N
HPCAL1	hippocalcin-like protein 1 [Canis lupus familiaris]	468	908000	347000	N	N
SSC5D	soluble scavenger receptor cysteine-rich domain-containing protein SSC5D [Canis lupus familiaris]	470	890000	171000	N	N
TUBA8	tubulin alpha-8 chain isoform X1 [Canis lupus familiaris]	474	880000	455000	Y	Y
TGOLN2; LOC475772	trans-Golgi network integral membrane protein 2 isoform X1 [Canis lupus familiaris]	477	859000	223000	N	N
UBE2M	NEDD8-conjugating enzyme Ubc12 [Canis lupus familiaris]	482	837000	194000	N	N
LOC487150	malignant T-cell-amplified sequence 1-like [Canis lupus familiaris]	484	827000	292000	N	N
ENTPD6	ectonucleoside triphosphate diphosphohydrolase 6 isoform X1 [Canis lupus familiaris]	486	819000	75000	N	N
FAM188A; MINDY3	ubiquitin carboxyl-terminal hydrolase MINDY-3 isoform X1 [Canis lupus familiaris]	489	801000	350000	N	N
SERPIND1	heparin cofactor 2 [Canis lupus familiaris]	493	769000	126000	N	N
DSTN	destrin [Canis lupus familiaris]	498	761000	295000	Y	Y
FHOD1	FH1/FH2 domain-containing protein 1 isoform X4 [Canis lupus familiaris]	500	752000	181000	N	N
CBFB	core-binding factor subunit beta [Canis lupus familiaris]	501	741000	236000	N	N
PSMD10	26S proteasome non-ATPase regulatory subunit 10 isoform X1 [Canis lupus familiaris]	502	735000	360000	N	N
GUK1	guanylate kinase isoform X1 [Canis lupus familiaris]	503	730000	283000	N	N
AMBP	protein AMBP [Canis lupus familiaris]	505	712000	61100	Y	N
GCLM	glutamate--cysteine ligase regulatory subunit [Canis lupus familiaris]	506	712000	276000	N	N
DCTD; LOC607328	deoxycytidylate deaminase [Canis lupus familiaris]	507	712000	246000	N	N
AZGP1	zinc-alpha-2-glycoprotein precursor [Canis lupus familiaris]	510	670000	58100	Y	N
ARSA	arylsulfatase A precursor [Canis lupus familiaris]	511	667000	132000	N	N
PROSC; PLPBP	pyridoxal phosphate homeostasis protein isoform X1 [Canis lupus familiaris]	512	659000	312000	N	N
GLB1L	beta-galactosidase-1-like protein [Canis lupus familiaris]	514	651000	48700	Y	N
NAGA	alpha-N-acetylgalactosaminidase [Canis lupus familiaris]	517	644000	71800	N	N
PLAUR	urokinase plasminogen activator surface receptor [Canis lupus familiaris]	519	626000	ID only	N	N
LOC100856401; HN1L; JPT2	jupiter microtubule associated homolog 2 isoform X1 [Canis lupus familiaris]	522	612000	201000	N	N
SUGT1	protein SGT1 homolog [Canis lupus familiaris]	523	610000	168000	N	N
ETFB	electron transfer flavoprotein subunit beta isoform X2 [Canis lupus familiaris]	525	600000	181000	N	N
PTPN12	tyrosine-protein phosphatase non-receptor type 12 isoform X1 [Canis lupus familiaris]	529	587000	253000	N	N
GGCT	gamma-glutamylcyclotransferase [Canis lupus familiaris]	530	581000	247000	N	N
ENOPH1	enolase-phosphatase E1 isoform X1 [Canis lupus familiaris]	531	577000	265000	N	N
SORD	sorbitol dehydrogenase [Canis lupus familiaris]	535	572000	291000	N	Y
DTD1	D-tyrosyl-tRNA(Tyr) deacylase 1 isoform X1 [Canis lupus familiaris]	537	568000	186000	N	N
PRKAG1	5'-AMP-activated protein kinase subunit gamma-1 isoform X1 [Canis lupus familiaris]	538	567000	107000	N	N
CTSA	lysosomal protective protein precursor [Canis lupus familiaris]	539	557000	40600	Y	N
INPP1	inositol polyphosphate 1-phosphatase isoform X1 [Canis lupus familiaris]	540	557000	490000	N	N
IPO7	importin-7 [Canis lupus familiaris]	541	557000	271000	N	N
PPIL3	peptidyl-prolyl cis-trans isomerase-like 3 isoform X1 [Canis lupus familiaris]	542	556000	309000	N	N
HDDC3	guanosine-3',5'-bis(diphosphate) 3'-pyrophosphohydrolase MESH1 [Canis lupus familiaris]	543	555000	259000	N	N
ESAM	endothelial cell-selective adhesion molecule isoform X1 [Canis lupus familiaris]	544	545000	16000	Y	N
FAM129B	niban-like protein 1 [Canis lupus familiaris]	545	534000	118000	N	N
METRNL	meteorin-like protein [Canis lupus familiaris]	546	533000	26500	N	N
IGF2	insulin-like growth factor II isoform X1 [Canis lupus familiaris]	547	529000	44700	N	N
GAA	lysosomal alpha-glucosidase isoform X1 [Canis lupus familiaris]	549	524000	37900	N	N
UBE2N	ubiquitin-conjugating enzyme E2 N [Canis lupus familiaris]	550	517000	110000	N	N
STAT3	signal transducer and activator of transcription 3 isoform X1 [Canis lupus familiaris]	551	514000	190000	N	N
FBLN5	fibulin-5 isoform X1 [Canis lupus familiaris]	553	501000		N	N
SEPT9	septin-9 [Canis lupus familiaris]	557	497000	114000	N	N
LMAN2	vesicular integral-membrane protein VIP36 precursor [Canis lupus familiaris]	559	493000	176000	N	N
ADIPOQ	adiponectin isoform X1 [Canis lupus familiaris]	561	487000	187000	N	N
LOC100855709; ADPRH	ADP-ribosylarginine hydrolase [Canis lupus familiaris]	562	484000	155000	N	N
PRKACA	cAMP-dependent protein kinase catalytic subunit alpha [Canis lupus familiaris]	563	484000	239000	N	N
EIF3K	eukaryotic translation initiation factor 3 subunit K [Canis lupus familiaris]	568	460000	170000	N	N
PPP2R2A	serine/threonine-protein phosphatase 2A 55 kDa regulatory subunit B alpha isoform isoform X1 [Canis lupus familiaris]	570	447000	172000	N	N
LOC100855626; SNX12	sorting nexin-12 [Canis lupus familiaris]	571	446000	77600	N	N
EFEMP1	EGF-containing fibulin-like extracellular matrix protein 1 [Canis lupus familiaris]	572	443000	20200	N	N
PAM	peptidyl-glycine alpha-amidating monooxygenase [Canis lupus familiaris]	573	442000	46700	N	N
MOB1B	MOB kinase activator 1B isoform X1 [Canis lupus familiaris]	574	434000	74200	N	N
ERP44	endoplasmic reticulum resident protein 44 [Canis lupus familiaris]	575	433000	299000	N	N
SNF8	vacuolar-sorting protein SNF8 isoform X1 [Canis lupus familiaris]	576	431000	112000	N	N
LOC100856272; GMFB	glia maturation factor beta isoform X1 [Canis lupus familiaris]	577	428000	138000	N	N
PTS	6-pyruvoyl tetrahydrobiopterin synthase [Canis lupus familiaris]	581	416000	139000	N	N
HSD17B10	3-hydroxyacyl-CoA dehydrogenase type-2 [Canis lupus familiaris]	585	405000	172000	N	N
TFG	protein TFG isoform X1 [Canis lupus familiaris]	586	404000	85300	N	N
XYLT2	xylosyltransferase 2 [Canis lupus familiaris]	588	400000	ID only	Y	N
EIF2S1	eukaryotic translation initiation factor 2 subunit 1 [Canis lupus familiaris]	591	392000	146000	N	N
CCL23	C-C motif chemokine 23 isoform X1 [Canis lupus familiaris]	592	391000	7900	N	N
CFD	complement factor D isoform X1 [Canis lupus familiaris]	594	389000	40900	N	N
B4GALT1	beta-1,4-galactosyltransferase 1 [Canis lupus familiaris]	596	385000		N	N
FN3K	fructosamine-3-kinase [Canis lupus familiaris]	597	366000	142000	N	N
IGFBP4	insulin-like growth factor-binding protein 4 [Canis lupus familiaris]	598	358000	46700	N	N
NQO1	NAD(P)H dehydrogenase [quinone] 1 [Canis lupus familiaris]	599	356000	141000	N	N
CBX3	chromobox protein homolog 3 isoform X1 [Canis lupus familiaris]	600	356000	133000	N	N
DLGAP4	disks large-associated protein 4 isoform X2 [Canis lupus familiaris]	601	354000	146000	N	N
SDF4	45 kDa calcium-binding protein [Canis lupus familiaris]	602	354000	ID only	N	N
LOC100855579; LYPLA2	acyl-protein thioesterase 2 [Canis lupus familiaris]	603	353000	47500	N	N
GLG1	Golgi apparatus protein 1 [Canis lupus familiaris]	605	338000	78900	Y	N
PPP1R11	protein phosphatase 1 regulatory subunit 11 isoform X1 [Canis lupus familiaris]	608	321000	145000	N	N
B3GNT1; B4GAT1	beta-1,4-glucuronyltransferase 1 [Canis lupus familiaris]	613	312000		N	N
MASP2	mannan-binding lectin serine protease 2 [Canis lupus familiaris]	615	309000	27000	N	N
KLKB1	plasma kallikrein [Canis lupus familiaris]	617	293000	64300	N	N
ESYT1	extended synaptotagmin-1 [Canis lupus familiaris]	619	290000	108000	N	N
EFTUD1; EFL1	elongation factor-like GTPase 1 [Canis lupus familiaris]	622	279000	46700	N	N
ADPGK	ADP-dependent glucokinase isoform X1 [Canis lupus familiaris]	623	277000	8410	N	N
EHBP1L1	EH domain-binding protein 1-like protein 1 isoform X1 [Canis lupus familiaris]	628	262000	137000	N	N
NACA	nascent polypeptide-associated complex subunit alpha isoform X1 [Canis lupus familiaris]	629	261000	80800	N	N
POGLUT1	protein O-glucosyltransferase 1 isoform X2 [Canis lupus familiaris]	630	255000	120000	N	N
WDR13	WD repeat-containing protein 13 isoform X1 [Canis lupus familiaris]	635	241000	126000	N	Y
WAS	wiskott-Aldrich syndrome protein [Canis lupus familiaris]	636	241000	19400	N	N
GABARAP	gamma-aminobutyric acid receptor-associated protein isoform X1 [Canis lupus familiaris]	639	236000	79500	N	N
NPC2	epididymal secretory protein E1 precursor [Canis lupus familiaris]	643	218000	16100	N	N
TNFAIP8	tumor necrosis factor alpha-induced protein 8 isoform X1 [Canis lupus familiaris]	644	218000	48300	N	N
THBS4	thrombospondin-4 [Canis lupus familiaris]	649	194000	ID only	N	N
DLG3	disks large homolog 3 isoform X1 [Canis lupus familiaris]	653	184000	71000	N	N
NUDT2	bis(5'-nucleosyl)-tetraphosphatase [asymmetrical] [Canis lupus familiaris]	656	174000	67500	N	N
PPIH	peptidyl-prolyl cis-trans isomerase H [Canis lupus familiaris]	659	162000	8290	N	N
PAIP1	polyadenylate-binding protein-interacting protein 1 isoform X1 [Canis lupus familiaris]	665	151000	32500	N	N
FHIT	bis(5'-adenosyl)-triphosphatase isoform X1 [Canis lupus familiaris]	666	148000	57600	N	N
FGR	tyrosine-protein kinase Fgr [Canis lupus familiaris]	667	148000	49100	N	N
TXNDC5	thioredoxin domain-containing protein 5 [Canis lupus familiaris]	671	142000	107000	N	N
DYNLT3	dynein light chain Tctex-type 3 [Canis lupus familiaris]	673	137000	102000	N	N
PPP3CA	serine/threonine-protein phosphatase 2B catalytic subunit alpha isoform [Canis lupus familiaris]	674	136000	27700	N	N
CRLF3	cytokine receptor-like factor 3 isoform X2 [Canis lupus familiaris]	675	134000	115000	N	N
EDF1	endothelial differentiation-related factor 1 [Canis lupus familiaris]	677	130000	51500	N	N
MAP2K3	dual specificity mitogen-activated protein kinase kinase 3 [Canis lupus familiaris]	682	117000	27300	N	N
VPS28	vacuolar protein sorting-associated protein 28 homolog isoform X1 [Canis lupus familiaris]	686	103000	59000	N	N
CAPS proteins unique to the pellet fraction (n = 189)
FN1	fibronectin isoform X7 [Canis lupus familiaris]	5	1090000000	202000000	Y	N
FERMT3	fermitin family homolog 3 [Canis lupus familiaris]	23	183000000	106000000	Y	N
F13A1	coagulation factor XIII A chain [Canis lupus familiaris]	29	134000000	52400000	Y	N
GAPDH	glyceraldehyde-3-phosphate dehydrogenase [Canis lupus familiaris]	30	130000000	53500000	Y	N
ITGA2B	integrin alpha-IIb isoform X1 [Canis lupus familiaris]	31	126000000	68700000	Y	N
GP1BB	platelet glycoprotein Ib beta chain [Canis lupus familiaris]	45	63900000	27900000	Y	N
ACTN1	alpha-actinin-1 isoform X4 [Canis lupus familiaris]	48	58800000	25600000	Y	N
ALDOA	fructose-bisphosphate aldolase A [Canis lupus familiaris]	51	52500000	20100000	Y	Y
PARVB	beta-parvin isoform X1 [Canis lupus familiaris]	53	50300000	27600000	Y	N
LDHA; LOC476882	L-lactate dehydrogenase A chain isoform X1 [Canis lupus familiaris]	64	36100000	12000000	Y	Y
LOC607368	immunoglobulin lambda-1 light chain isoform X34 [Canis lupus familiaris]	65	35900000	7370000	N	N
ACTR3B; ACTR3	actin-related protein 3 [Canis lupus familiaris]	106	18300000	7420000	Y	N
ACTR2	actin-related protein 2 isoform X2 [Canis lupus familiaris]	115	16500000	5640000	Y	N
CCT2	T-complex protein 1 subunit beta isoform X1 [Canis lupus familiaris]	118	16100000	8240000	N	N
GP1BA	platelet glycoprotein Ib alpha chain precursor [Canis lupus familiaris]	124	14100000	6270000	Y	Y
ARPC1B	actin-related protein 2/3 complex subunit 1B [Canis lupus familiaris]	129	12900000	3880000	Y	N
TKT	transketolase [Canis lupus familiaris]	133	12200000	5710000	Y	N
ARPC4	actin-related protein 2/3 complex subunit 4 [Canis lupus familiaris]	152	9030000	3620000	Y	N
STOM	erythrocyte band 7 integral membrane protein [Canis lupus familiaris]	168	8140000	3380000	Y	N
IGJ; JCHAIN	immunoglobulin J chain [Canis lupus familiaris]	174	7650000	2170000	N	N
SPTB	spectrin beta chain, erythrocytic isoform X1 [Canis lupus familiaris]	179	7240000	3780000	N	N
WDR1	WD repeat-containing protein 1 [Canis lupus familiaris]	185	6950000	3650000	Y	N
GMPR	GMP reductase 1 [Canis lupus familiaris]	190	6650000	2170000	N	N
PSMA6	proteasome subunit alpha type-6 isoform X1 [Canis lupus familiaris]	191	6570000	2590000	N	N
STXBP2	syntaxin-binding protein 2 [Canis lupus familiaris]	204	5740000	2590000	N	N
PLCG2	1-phosphatidylinositol 4,5-bisphosphate phosphodiesterase gamma-2 [Canis lupus familiaris]	205	5680000	2280000	N	N
ARPC2	actin-related protein 2/3 complex subunit 2 [Canis lupus familiaris]	207	5660000	1670000	Y	N
CD5L	CD5 antigen-like precursor [Canis lupus familiaris]	210	5440000	1490000	N	Y
CORO1A	coronin-1A [Canis lupus familiaris]	215	5100000	2270000	Y	N
PYGB	glycogen phosphorylase, brain form [Canis lupus familiaris]	222	4770000	2060000	Y	N
FTH1	ferritin heavy chain [Canis lupus familiaris]	226	4510000	2000000	N	N
PSMA1	proteasome subunit alpha type-1 [Canis lupus familiaris]	228	4420000	1750000	N	N
YWHAE	14-3-3 protein epsilon isoform X2 [Canis lupus familiaris]	231	4360000	1500000	Y	N
PSMA7	proteasome subunit alpha type-7 [Canis lupus familiaris]	232	4310000	1630000	N	N
GP9	platelet glycoprotein IX [Canis lupus familiaris]	233	4310000	1500000	N	N
TIMP3	metalloproteinase inhibitor 3 precursor [Canis lupus familiaris]	234	4250000	147000	N	Y
GNAQ	guanine nucleotide-binding protein G(q) subunit alpha [Canis lupus familiaris]	236	4230000	1570000	N	N
MVP	major vault protein [Canis lupus familiaris]	237	4220000	2240000	N	N
ACHE	acetylcholinesterase [Canis lupus familiaris]	239	4210000	752000	N	N
PDGFB	platelet-derived growth factor subunit B isoform X1 [Canis lupus familiaris]	252	3740000	187000	Y	N
LYN	tyrosine-protein kinase Lyn isoform X2 [Canis lupus familiaris]	261	3480000	1440000	N	N
LOC100856348; PSMA5	proteasome subunit alpha type-5 [Canis lupus familiaris]	267	3300000	1300000	N	N
FTL; LOC102155200	ferritin light chain [Canis lupus familiaris]	279	3040000	1290000	N	N
DLA-12	MHC class I DLA-12 precursor [Canis lupus familiaris]	289	2810000	1110000	N	N
LOC100856747; ARPC3	actin-related protein 2/3 complex subunit 3 isoform X1 [Canis lupus familiaris]	290	2790000	1190000	Y	N
PPP1CB	serine/threonine-protein phosphatase PP1-beta catalytic subunit [Canis lupus familiaris]	291	2790000	1150000	N	N
GDI1	rab GDP dissociation inhibitor alpha [Canis lupus familiaris]	292	2790000	1290000	N	N
ACOT7	cytosolic acyl coenzyme A thioester hydrolase isoform X1 [Canis lupus familiaris]	293	2770000	1260000	N	N
CD109	CD109 antigen isoform X1 [Canis lupus familiaris]	296	2710000	1180000	N	N
ANXA5	annexin A5 isoform X1 [Canis lupus familiaris]	299	2670000	859000	N	N
ADA	adenosine deaminase isoform X2 [Canis lupus familiaris]	306	2520000	1250000	N	N
SPTLC1	serine palmitoyltransferase 1 isoform X1 [Canis lupus familiaris]	309	2380000	27400	N	N
ARRB1	beta-arrestin-1 isoform X7 [Canis lupus familiaris]	312	2320000	831000	N	N
CD46; LOC609365	membrane cofactor protein isoform X1 [Canis lupus familiaris]	314	2300000	1120000	N	N
LOC100855659; PSMB5	proteasome subunit beta type-5 [Canis lupus familiaris]	316	2280000	899000	N	N
PSMA2	proteasome subunit alpha type-2 [Canis lupus familiaris]	318	2260000	656000	N	N
SND1	staphylococcal nuclease domain-containing protein 1 [Canis lupus familiaris]	333	2150000	868000	N	N
LOC100855651; KIF5B	kinesin-1 heavy chain [Canis lupus familiaris]	334	2140000	1020000	N	N
GLUD1	glutamate dehydrogenase 1, mitochondrial [Canis lupus familiaris]	337	2090000	882000	N	N
CLIC1	chloride intracellular channel protein 1 [Canis lupus familiaris]	343	2000000	1010000	Y	N
PSMB1	proteasome subunit beta type-1 [Canis lupus familiaris]	345	1950000	900000	N	N
PSMC6	26S proteasome regulatory subunit 10B [Canis lupus familiaris]	348	1940000	672000	N	N
GNPDA1	glucosamine-6-phosphate isomerase 1 [Canis lupus familiaris]	349	1910000	514000	N	N
FERMT2	fermitin family homolog 2 [Canis lupus familiaris]	350	1910000	1120000	N	N
PSMB4	proteasome subunit beta type-4 [Canis lupus familiaris]	357	1790000	814000	N	N
PSMB3	proteasome subunit beta type-3 [Canis lupus familiaris]	364	1730000	716000	N	N
PSMD14	26S proteasome non-ATPase regulatory subunit 14 [Canis lupus familiaris]	371	1620000	755000	N	N
COPB2	coatomer subunit beta' isoform X2 [Canis lupus familiaris]	375	1600000	823000	N	N
GNA11	guanine nucleotide-binding protein subunit alpha-11 [Canis lupus familiaris]	379	1520000	568000	N	N
AP1M1	AP-1 complex subunit mu-1 isoform X1 [Canis lupus familiaris]	380	1520000	576000	N	N
PADI3	protein-arginine deiminase type-3 [Canis lupus familiaris]	381	1510000	434000	N	N
PSMD1	26S proteasome non-ATPase regulatory subunit 1 [Canis lupus familiaris]	388	1470000	780000	N	N
LDHB	L-lactate dehydrogenase B chain [Canis lupus familiaris]	389	1430000	589000	Y	N
PNP	purine nucleoside phosphorylase [Canis lupus familiaris]	392	1410000	503000	Y	N
GYPA	glycophorin-A precursor [Canis lupus familiaris]	395	1400000	412000	N	N
ADAM10	disintegrin and metalloproteinase domain-containing protein 10 [Canis lupus familiaris]	408	1290000	637000	N	N
ATP6V1A	V-type proton ATPase catalytic subunit A [Canis lupus familiaris]	410	1280000	665000	N	N
CLSTN1; LOC479600	calsyntenin-1 isoform X1 [Canis lupus familiaris]	411	1270000	37600	Y	N
TPI1	triosephosphate isomerase [Canis lupus familiaris]	413	1260000	730000	Y	Y
SLC16A7	monocarboxylate transporter 2 [Canis lupus familiaris]	414	1260000	650000	N	N
VPS26A	vacuolar protein sorting-associated protein 26A isoform X1 [Canis lupus familiaris]	425	1170000	410000	N	N
EEF1A1; LOC102156596; LOC102155289	elongation factor 1-alpha 1 [Canis lupus familiaris]	428	1150000	528000	N	N
RENBP	N-acylglucosamine 2-epimerase [Canis lupus familiaris]	436	1090000	427000	N	N
C1QC	complement C1q subcomponent subunit C [Canis lupus familiaris]	437	1090000	394000	N	N
ALAD	delta-aminolevulinic acid dehydratase [Canis lupus familiaris]	439	1070000	356000	Y	N
SCAMP2	secretory carrier-associated membrane protein 2 isoform X1 [Canis lupus familiaris]	441	1070000	411000	N	N
ABI1	abl interactor 1 isoform X1 [Canis lupus familiaris]	442	1060000	200000	N	N
SLC44A2	choline transporter-like protein 2 isoform X1 [Canis lupus familiaris]	443	1060000	478000	N	N
AP2A1	AP-2 complex subunit alpha-1 isoform X1 [Canis lupus familiaris]	444	1060000	439000	N	N
GNB2	guanine nucleotide-binding protein G(I)/G(S)/G(T) subunit beta-2 [Canis lupus familiaris]	448	1030000	335000	N	N
COPA	coatomer subunit alpha, partial [Canis lupus familiaris]	452	1010000	351000	N	N
MDH1	malate dehydrogenase, cytoplasmic [Canis lupus familiaris]	454	993000	271000	N	N
TRAPPC3	trafficking protein particle complex subunit 3 isoform X1 [Canis lupus familiaris]	455	982000	414000	N	N
CD38	ADP-ribosyl cyclase/cyclic ADP-ribose hydrolase 1 [Canis lupus familiaris]	463	942000	319000	N	N
GNAZ	guanine nucleotide-binding protein G(z) subunit alpha [Canis lupus familiaris]	467	912000	362000	N	N
PRKCA	protein kinase C alpha type [Canis lupus familiaris]	469	905000	539000	N	N
LOC100856067; DPYS	dihydropyrimidinase [Canis lupus familiaris]	471	887000	338000	N	N
STX11	syntaxin-11 isoform X1 [Canis lupus familiaris]	475	865000	377000	N	N
LOC100855485	pituitary tumor-transforming gene 1 protein-interacting protein-like, partial [Canis lupus familiaris]	478	852000	370000	N	N
PSMD13	26S proteasome non-ATPase regulatory subunit 13 [Canis lupus familiaris]	479	849000	381000	N	N
HSPA4	heat shock 70 kDa protein 4 [Canis lupus familiaris]	480	845000	381000	N	N
RAP2A	ras-related protein Rap-2a [Canis lupus familiaris]	481	841000	386000	N	N
LY6G6C	lymphocyte antigen 6 complex locus protein G6c [Canis lupus familiaris]	485	824000	290000	N	N
C12H6orf25; MPIG6B	megakaryocyte and platelet inhibitory receptor G6b isoform X2 [Canis lupus familiaris]	488	806000	292000	N	N
RALB	ras-related protein Ral-B [Canis lupus familiaris]	492	789000	344000	N	N
BLMH	bleomycin hydrolase [Canis lupus familiaris]	494	765000	274000	N	N
DYNC1H1	cytoplasmic dynein 1 heavy chain 1 [Canis lupus familiaris]	496	764000	437000	N	N
LOC100856634; RAB32	ras-related protein Rab-32 [Canis lupus familiaris]	497	763000	287000	N	N
CD47	leukocyte surface antigen CD47 isoform X1 [Canis lupus familiaris]	499	757000	356000	N	N
RAP2B	ras-related protein Rap-2b [Canis lupus familiaris]	508	710000	281000	N	N
LOC100855769; PAICS	uncharacterized protein KIAA1211 isoform X3 [Canis lupus familiaris]	509	688000	220000	N	N
KIF2A	kinesin-like protein KIF2A isoform X1 [Canis lupus familiaris]	515	651000	265000	N	N
GNA13	guanine nucleotide-binding protein subunit alpha-13 isoform X1 [Canis lupus familiaris]	516	649000	240000	N	N
JUP	junction plakoglobin isoform X1 [Canis lupus familiaris]	518	643000	152000	N	N
ACLY	ATP-citrate synthase isoform X4 [Canis lupus familiaris]	521	617000	265000	N	N
METTL7A	methyltransferase-like protein 7A [Canis lupus familiaris]	524	608000	277000	N	N
GPI	glucose-6-phosphate isomerase [Canis lupus familiaris]	526	597000	320000	Y	N
RAB5C	ras-related protein Rab-5C [Canis lupus familiaris]	527	589000	93700	N	N
ITGAV	integrin alpha-V [Canis lupus familiaris]	534	574000	255000	N	N
STX4	syntaxin-4 [Canis lupus familiaris]	536	569000	210000	N	N
PSMD3	26S proteasome non-ATPase regulatory subunit 3 [Canis lupus familiaris]	554	501000	235000	N	N
LOC100856258; GLIPR2	Golgi-associated plant pathogenesis-related protein 1 isoform X1 [Canis lupus familiaris]	555	501000	297000	N	N
ARF1; LOC100856517	ADP-ribosylation factor 1 [Canis lupus familiaris]	558	496000	204000	N	N
GNAS	guanine nucleotide-binding protein G(s) subunit alpha [Canis lupus familiaris]	560	493000	173000	N	N
AMPD2	AMP deaminase 2 isoform X4 [Canis lupus familiaris]	564	482000	200000	N	N
LOC102156962; CD58	lymphocyte function-associated antigen 3 [Canis lupus familiaris]	565	482000	190000	N	N
INPP5D	phosphatidylinositol 3,4,5-trisphosphate 5-phosphatase 1 [Canis lupus familiaris]	566	461000	260000	N	N
HMHA1; ARHGAP45	rho GTPase-activating protein 45 isoform X1 [Canis lupus familiaris]	567	462000	201000	N	N
CPNE3	copine-3 isoform X1 [Canis lupus familiaris]	569	458000	81900	N	N
DDX3X	ATP-dependent RNA helicase DDX3X isoform X1 [Canis lupus familiaris]	578	422000	148000	N	N
EML2	echinoderm microtubule-associated protein-like 2 isoform X1 [Canis lupus familiaris]	579	420000	200000	N	N
EIF3I	eukaryotic translation initiation factor 3 subunit I [Canis lupus familiaris]	580	417000	109000	N	N
LOC100856586; COPS4	COP9 signalosome complex subunit 4 isoform X1 [Canis lupus familiaris]	582	414000	56600	N	N
STIP1	stress-induced-phosphoprotein 1 [Canis lupus familiaris]	583	412000	189000	N	N
RUVBL2	ruvB-like 2 [Canis lupus familiaris]	584	409000	208000	N	N
GMPR2	GMP reductase 2 [Canis lupus familiaris]	587	403000	132000	N	N
EIF3B	eukaryotic translation initiation factor 3 subunit B [Canis lupus familiaris]	590	393000	189000	N	N
CYBRD1	cytochrome b reductase 1 [Canis lupus familiaris]	593	391000	192000	N	N
RAB13	ras-related protein Rab-13 [Canis lupus familiaris]	595	387000	176000	N	N
ANGPT1	angiopoietin-1 isoform X1 [Canis lupus familiaris]	604	349000	21800	Y	N
GOT2	aspartate aminotransferase, mitochondrial [Canis lupus familiaris]	606	326000	129000	N	N
ALDOC	fructose-bisphosphate aldolase C isoform X1 [Canis lupus familiaris]	610	317000	97600	N	N
NBEA	neurobeachin isoform X1 [Canis lupus familiaris]	611	314000	111000	N	N
AHCY	adenosylhomocysteinase [Canis lupus familiaris]	614	311000	132000	N	N
GYG1	glycogenin-1 isoform X1 [Canis lupus familiaris]	616	307000	119000	N	N
CLU	clusterin precursor [Canis lupus familiaris]	620	288000	38400	Y	N
RGS7	regulator of G-protein signaling 7 isoform X1 [Canis lupus familiaris]	624	273000	75100	N	N
DCTN4	dynactin subunit 4 isoform X1 [Canis lupus familiaris]	625	272000	33800	N	N
RAB10	ras-related protein Rab-10 [Canis lupus familiaris]	627	268000	127000	N	N
UBE2O	(E3-independent) E2 ubiquitin-conjugating enzyme [Canis lupus familiaris]	632	251000	104000	N	N
LOC100856745; HADHA	trifunctional enzyme subunit alpha, mitochondrial [Canis lupus familiaris]	633	247000	150000	N	N
LOC611458	pregnancy zone protein-like isoform X1 [Canis lupus familiaris]	634	246000	19900	N	N
ATP1A1	sodium/potassium-transporting ATPase subunit alpha-1 precursor [Canis lupus familiaris]	637	241000	125000	N	N
CPNE1	copine-1 [Canis lupus familiaris]	638	237000	108000	N	N
GNPDA2	glucosamine-6-phosphate isomerase 2 isoform X1 [Canis lupus familiaris]	640	235000	63600	N	N
PPP2R1A; LOC484335	serine/threonine-protein phosphatase 2A 65 kDa regulatory subunit A alpha isoform isoform X1 [Canis lupus familiaris]	641	230000	133000	N	N
UXS1	UDP-glucuronic acid decarboxylase 1 isoform X1 [Canis lupus familiaris]	642	223000	34100	N	N
SLC9A3R1	Na(+)/H(+) exchange regulatory cofactor NHE-RF1 isoform X1 [Canis lupus familiaris]	645	213000	58300	N	N
TNIK	TRAF2 and NCK-interacting protein kinase isoform X1 [Canis lupus familiaris]	646	213000	64200	N	N
CBR3	carbonyl reductase [NADPH] 3 [Canis lupus familiaris]	647	199000	75300	N	N
TAPBP	tapasin precursor [Canis lupus familiaris]	650	194000	77400	N	N
NMNAT3	nicotinamide/nicotinic acid mononucleotide adenylyltransferase 3 isoform X1 [Canis lupus familiaris]	651	194000	75500	N	N
AP1G1	AP-1 complex subunit gamma-1 isoform X1 [Canis lupus familiaris]	652	191000	91900	N	N
HABP2	hyaluronan-binding protein 2 [Canis lupus familiaris]	654	178000	ID only	Y	N
HNRNPA2B1	heterogeneous nuclear ribonucleoproteins A2/B1 isoform X1 [Canis lupus familiaris]	655	176000	63400	N	N
SEPT11	septin-11 isoform X1 [Canis lupus familiaris]	657	171000	62900	N	N
FAM175B; ABRAXAS2	BRISC complex subunit Abraxas 2 [Canis lupus familiaris]	658	164000	ID only	N	N
ACADS	short-chain specific acyl-CoA dehydrogenase, mitochondrial, partial [Canis lupus familiaris]	660	161000	84200	N	N
CTDSPL	CTD small phosphatase-like protein [Canis lupus familiaris]	662	160000	43700	N	N
WDR61	WD repeat-containing protein 61 [Canis lupus familiaris]	663	156000	66700	N	N
ADSL	adenylosuccinate lyase isoform X2 [Canis lupus familiaris]	664	152000	41000	N	N
PPP1CC	serine/threonine-protein phosphatase PP1-gamma catalytic subunit isoform X1 [Canis lupus familiaris]	668	147000	46300	N	N
GYPC	glycophorin-C isoform X1 [Canis lupus familiaris]	669	147000	66300	N	N
AP1S2	AP-1 complex subunit sigma-2 isoform X3 [Canis lupus familiaris]	670	144000	41700	N	N
RTN4	reticulon-4 isoform X1 [Canis lupus familiaris]	672	139000	36500	N	N
STK38	serine/threonine-protein kinase 38 isoform X1 [Canis lupus familiaris]	676	133000	7520	N	N
CHMP6	charged multivesicular body protein 6 [Canis lupus familiaris]	678	130000	43500	N	N
MEMO1	protein MEMO1 [Canis lupus familiaris]	679	127000	35700	N	N
PLP2	proteolipid protein 2 [Canis lupus familiaris]	680	126000	73900	N	N
GOT1	aspartate aminotransferase, cytoplasmic [Canis lupus familiaris]	681	121000	40200	N	N
TMEM9B	transmembrane protein 9B isoform X1 [Canis lupus familiaris]	683	106000	40900	N	N
TCN2	transcobalamin-2 [Canis lupus familiaris]	685	105000	ID only	N	N
CTSC	dipeptidyl peptidase 1 precursor [Canis lupus familiaris]	687	99300	ID only	Y	N
UBR4	E3 ubiquitin-protein ligase UBR4 isoform X1 [Canis lupus familiaris]	688	92700	23100	N	N
DNASE1L1	deoxyribonuclease-1-like 1 isoform X1 [Canis lupus familiaris]	689	87100	27400	N	N
CHMP4B	charged multivesicular body protein 4b [Canis lupus familiaris]	690	82200	34400	N	N
LOC100687054	immunoglobulin lambda-like polypeptide 5 [Canis lupus familiaris]	691	66100	10800	N	N
XG	glycoprotein Xg [Canis lupus familiaris]	692	57500	33300	N	N
RRAGB	ras-related GTP-binding protein B isoform X1 [Canis lupus familiaris]	693	46900	ID only	N	N
