# Supplementary material for: Proteomic profiling of the thrombin-activated canine platelet secretome (CAPS)
Source: PLoS One. 2019 Nov 13;14(11):e0224891. doi: 10.1371/journal.pone.0224891 (PMC6853320; doi:10.1371/journal.pone.0224891)
Supplement: S5 Table — GO-annotations that were significantly enriched for the 693 CAPS proteins found in at least 2/3 dogs with a stim/control ratio ≥ 2. (XLSX) [file pone.0224891.s008.xlsx]

## Sheet: Table S5_Sign. Go-a MolFun
Table S5. Significantly enriched Go-annotations for Molecular function.
Go-annotations that were significantly enriched for the 693 CAPS proteins found in at least 2/3 dogs with a stim/control ratio ≥ 2.
GO ID	Term	Proteins with annotation (#)	Annotated CAPS proteins (#)	Proteins expected by chance (#)	P
GO:0061134	peptidase regulator activity	252	32	4.83	2.8e-17
GO:0061135	endopeptidase regulator activity	220	30	4.22	3.8e-17
GO:0004866	endopeptidase inhibitor activity	213	28	4.08	1.1e-15
GO:0030414	peptidase inhibitor activity	224	28	4.29	4.2e-15
GO:0003924	GTPase activity	430	35	8.24	7.6e-13
GO:0001882	nucleoside binding	558	40	10.7	1.0e-12
GO:0005525	GTP binding	544	39	10.43	1.9e-12
GO:0032550	purine ribonucleoside binding	545	39	10.45	2.0e-12
GO:0019001	guanyl nucleotide binding	571	40	10.95	2.1e-12
GO:0032561	guanyl ribonucleotide binding	571	40	10.95	2.1e-12
GO:0001883	purine nucleoside binding	547	39	10.49	2.3e-12
GO:0032549	ribonucleoside binding	551	39	10.56	2.9e-12
GO:0003824	catalytic activity	9531	253	182.69	3.4e-11
GO:0004867	serine-type endopeptidase inhibitor activity	113	17	2.17	5.6e-11
GO:0016787	hydrolase activity	3866	129	74.11	6.2e-11
GO:0050839	cell adhesion molecule binding	598	38	11.46	1.3e-10
GO:0004857	enzyme inhibitor activity	491	31	9.41	8.1e-09
GO:0030234	enzyme regulator activity	1320	57	25.3	9.2e-09
GO:0036094	small molecule binding	3976	121	76.21	7.4e-08
GO:0097367	carbohydrate derivative binding	3457	108	66.27	1.3e-07
