# Supplementary material for: Proteomic profiling of the thrombin-activated canine platelet secretome (CAPS)
Source: PLoS One. 2019 Nov 13;14(11):e0224891. doi: 10.1371/journal.pone.0224891 (PMC6853320; doi:10.1371/journal.pone.0224891)
Supplement: S7 Table — All protein raw data files generated from Dog 1 (D1). (XLSX) [file pone.0224891.s010.xlsx]

## Sheet: D1 Soluble (D1S)
Checked	Protein FDR Confidence: Combined	Master	Accession	Description	Exp. q-value: Combined	Contaminant	Sum PEP Score	Coverage [%]	# Peptides	# PSMs	# Unique Peptides	# Protein Groups	# AAs	MW [kDa]	calc. pI	Score Sequest HT: Sequest HT	# Peptides (by Search Engine): Sequest HT	# Razor Peptides	Abundance Ratio: (F4, Sample) / (F3, Control)	Abundance Ratio Adj. P-Value: (F4, Sample) / (F3, Control)	Abundance Ratio Variability [%]: (F4, Sample) / (F3, Control)	Abundances (Grouped): F3, Control	Abundances (Grouped): F4, Sample	Abundance: F3: Control	Abundance: F4: Sample	Found in Sample: [S3] F3: Control	Found in Sample: [S4] F4: Sample
TRUE	High	Master Protein	XP_003639438.1	talin-1 isoform X2 [Canis lupus familiaris]	0	FALSE	1436.3	66	112	1147	112	1	2541	269.6	6.14	2464.66	112	0	0.681	0.800348	15.07	117	83	9.9283e+08	7.04478e+08	High	High
	Checked	Confidence	Sequence	Modifications	Contaminant	Qvality PEP	Qvality q-value	# Protein Groups	# Proteins	# PSMs	Master Protein Accessions	# Missed Cleavages	Theo. MH+ [Da]	# Razor Quan Results	Abundance Ratio: (F4, Sample) / (F3, Control)	Abundance Ratio Adj. P-Value: (F4, Sample) / (F3, Control)	Abundance Ratio Variability [%]: (F4, Sample) / (F3, Control)	Abundances (Grouped): F3, Control	Abundances (Grouped): F4, Sample	Abundance: F3: Control	Abundance: F4: Sample	Quan Info	Found in Sample: [S3] F3: Control	Found in Sample: [S4] F4: Sample	Confidence (by Search Engine): Sequest HT	Percolator q-Value (by Search Engine): Sequest HT	Percolator PEP (by Search Engine): Sequest HT	XCorr (by Search Engine): Sequest HT	Top Apex RT [min]	Quan Usage
	TRUE	High	IGITNHDEYSLVR		FALSE	9.20563e-06	0	1	2	11	XP_003639438.1	0	1516.78	0	0.865	0.971875	0	107.2	92.8	4.16567e+07	36041797		High	High	High	0	1.718e-06	2.97	33.88	Used
	TRUE	High	ILAQATSDLVNAIK		FALSE	1.58591e-06	0	1	2	7	XP_003639438.1	0	1456.84	0	1.461	0.89828	0	81.3	118.7	7782176	11371007		High	High	High	0	3.763e-07	3.62	58.32	Used
	TRUE	High	ILAQATSDLVNAIKADAEGESDLENSR		FALSE	2.35757e-08	0	1	2	4	XP_003639438.1	1	2830.41	0	0.563	0.825073	0	127.9	72.1	6839747	3.85368e+06		High	High	High	0	9.97e-09	5.11	83.56	Used
	TRUE	High	ILAQATSDLVNAIKADAEGESDLENSR	1xDeamidated [N11]	FALSE	2.78647e-05	0	1	2	4	XP_003639438.1	1	2831.39	0								Not Reliable	High	High	High	0	4.46e-06	4.52		Not Used
	TRUE	High	ILAQATSDLVNAIKADAEGESDLENSRK	1xDeamidated [N]	FALSE	0.000831714	0	1	2	6	XP_003639438.1	2	2959.49	0	0.01	9.75497e-17		200		3683373			High	High	High	0	8.032e-05	4.77	79.42	Used
	TRUE	High	LLAALLEDEGGSGRPLLQAAK		FALSE	4.08708e-07	0	1	2	11	XP_003639438.1	0	2122.19	0	0.336	0.461879	0	149.6	50.4	3.12978e+07	10530469		High	High	High	0	1.17e-07	3.34	65.71	Used
	TRUE	High	LLAALLEDEGGSGRPLLQAAK	1xDeamidated [Q18]	FALSE	0.000631682	0	1	2	6	XP_003639438.1	0	2123.17	0								No Quan Values	High	High	High	0.0002019	0.001503	3.01		Not Used
	TRUE	High	VGDDPAVWQLK		FALSE	0.000384438	0	1	2	4	XP_003639438.1	0	1227.64	0	0.816	0.959098	0	110.1	89.9	6359254	5.18994e+06		High	High	High	0	5.004e-05	3.04	41.21	Used
	TRUE	High	VGAIPANALDDGQWSQGLISAAR	1xDeamidated [Q/N]	FALSE	0.000134929	0	1	2	12	XP_003639438.1	0	2311.17	0								No Quan Values	High	High	High	0	1.734e-05	4.42		Not Used
	TRUE	High	VGAIPANALDDGQWSQGLISAAR		FALSE	1.61817e-06	0	1	2	7	XP_003639438.1	0	2310.18	0	0.637	0.877459	0	122.2	77.8	9.97342e+06	6.35435e+06		High	High	High	0	3.481e-06	3.66	74.77	Used
	TRUE	High	LGAASLGAEDPETQVVLINAVK		FALSE	5.20427e-07	0	1	2	9	XP_003639438.1	0	2195.19	0	0.737	0.922256	0	115.2	84.8	1.29924e+07	9572609		High	High	High	0	5.097e-07	4.67	68.19	Used
	TRUE	High	LGAASLGAEDPETQVVLINAVK	1xDeamidated [N/Q]	FALSE	0.000371752	0	1	2	6	XP_003639438.1	0	2196.18	0	0.01	9.75497e-17		200		3.65116e+06			High	High	High	0	6.983e-05	4.05	68.31	Used
	TRUE	High	IPEALAGPPSDFGLFLSDDDPKK		FALSE	0.000342986	0	1	2	6	XP_003639438.1	1	2429.22	0	0.886	0.9743	0	106	94	3.44798e+06	3.05483e+06		High	High	High	0	3.849e-05	4.52	80.62	Used
	TRUE	High	VAGSVTELIQAAEAMK		FALSE	0.000217305	0	1	2	1	XP_003639438.1	0	1617.85	0								No Quan Values	High	Not Found	High	0	2.613e-05	3.43		Not Used
	TRUE	High	VAGSVTELIQAAEAMKGTEWVDPEDPTVIAENELLGAAAAIEAAAK	2xDeamidated [Q10; N32]; 1xOxidation [M15]	FALSE	2.82413e-05	0	1	2	2	XP_003639438.1	1	4668.31	0								No Quan Values	High	Not Found	High	0	0.0001047	5.81		Not Used
	TRUE	High	VAGSVTELIQAAEAMKGTEWVDPEDPTVIAENELLGAAAAIEAAAK	1xDeamidated [N32]; 1xOxidation [M15]	FALSE	0.000218768	0	1	2	1	XP_003639438.1	1	4667.33	0								No Quan Values	High	Not Found	High	0	2.629e-05	4.59		Not Used
	TRUE	High	VAGSVTELIQAAEAMKGTEWVDPEDPTVIAENELLGAAAAIEAAAK	1xOxidation [M15]	FALSE	5.2019e-05	0	1	2	1	XP_003639438.1	1	4666.34	0	0.01	9.75497e-17		200		831671			High	Not Found	High	0	7.652e-06	3.59	132.63	Used
	TRUE	High	VAGSVTELIQAAEAMK	1xOxidation [M15]	FALSE	1.13351e-05	0	1	2	4	XP_003639438.1	0	1633.85	0	0.704	0.905786	0	117.4	82.6	5.13279e+06	3.61417e+06		High	High	High	0	2.061e-06	4.6	70.57	Used
	TRUE	High	LNEAAAGLNQAATELVQASR		FALSE	9.39911e-09	0	1	2	6	XP_003639438.1	0	2027.05	0	0.805	0.952985	0	110.8	89.2	14499765	11667208		High	High	High	0	4.512e-09	4.91	66.84	Used
	TRUE	High	LNEAAAGLNQAATELVQASR	1xDeamidated [Q/N]	FALSE	1.97915e-06	0	1	2	16	XP_003639438.1	0	2028.04	0								No Quan Values	High	High	High	0	1.291e-06	3.97		Not Used
	TRUE	High	LNEAAAGLNQAATELVQASR	2xDeamidated [Q/N]	FALSE	7.57896e-07	0	1	2	3	XP_003639438.1	0	2029.02	0								No Quan Values	High	Not Found	High	0	1.998e-07	4.21		Not Used
	TRUE	High	LLSDSLPPSTGTFQEAQSR		FALSE	9.58159e-05	0	1	2	11	XP_003639438.1	0	2034.01	0	0.599	0.852006	0	125.1	74.9	4.37387e+06	2.62108e+06		High	High	High	0	1.492e-05	3.59	42.69	Used
	TRUE	High	HRVQELGHGCAALVTK	1xCarbamidomethyl [C10]	FALSE	5.20427e-07	0	1	2	5	XP_003639438.1	1	1775.93	0	0.728	0.915476	0	115.8	84.2	3399051	2.474e+06		High	High	High	0	2.555e-05	2.81	16.69	Used
	TRUE	High	KFFYSDQNVDSRDPVQLNLLYVQAR		FALSE	0.000502817	0	1	4	4	XP_003639438.1	2	3015.53	0	1.265	0.9465	0	88.3	111.7	880781	1114188		High	High	High	0	5.311e-05	3.27	71.99	Used
	TRUE	High	GTEWVDPEDPTVIAENELLGAAAAIEAAAK		FALSE	9.02211e-06	0	1	2	7	XP_003639438.1	0	3051.52	0	0.461	0.706678	0	136.9	63.1	4.50892e+06	2.07992e+06		High	High	High	0	1.691e-06	4.82	128.42	Used
	TRUE	High	GTEWVDPEDPTVIAENELLGAAAAIEAAAK	1xDeamidated [N16]	FALSE	2.00545e-05	0	1	2	7	XP_003639438.1	0	3052.5	0	0.573	0.831903	0	127.2	72.8	2.00281e+06	1.14705e+06		High	High	High	0	3.37e-06	4.87	128.46	Used
	TRUE	High	GTQACITAASAVSGIIADLDTTIMFATAGTLNR	1xCarbamidomethyl [C5]; 1xOxidation [M24]	FALSE	0.000100425	0	1	2	1	XP_003639438.1	0	3327.66	0								No Quan Values	High	Not Found	High	0	1.346e-05	2.38		Not Used
	TRUE	High	GTQACITAASAVSGIIADLDTTIMFATAGTLNR	1xCarbamidomethyl [C5]; 1xDeamidated [N32]; 1xOxidation [M24]	FALSE	3.10239e-05	0	1	2	2	XP_003639438.1	0	3328.64	0								No Quan Values	High	High	High	0	4.903e-06	4.31		Not Used
	TRUE	High	GVAALTSDPAVQAIVLDTASDVLDK		FALSE	2.73214e-07	0	1	2	5	XP_003639438.1	0	2469.31	0	0.548	0.811793	0	129.2	70.8	6020607	3.30133e+06		High	High	High	0	1.778e-07	5.01	107.62	Used
	TRUE	High	GVAALTSDPAVQAIVLDTASDVLDK	1xDeamidated [Q12]	FALSE	1.2623e-06	0	1	2	2	XP_003639438.1	0	2470.29	0								Not Reliable	High	Not Found	High	0	3.096e-07	4.17		Not Used
	TRUE	High	GVAALTSDPAVQAIVLDTASDVLDKASSLIEEAK		FALSE	0.000178869	0	1	2	1	XP_003639438.1	1	3397.79	0	0.536	0.800667	0	130.2	69.8	4416851	2.36861e+06		High	Peak Found	High	0	2.207e-05	3.95	134.39	Used
	TRUE	High	VLVEDTKVLVQNAAGSQEK		FALSE	0.000653235	0	1	2	2	XP_003639438.1	1	2028.1	0	0.947	0.987784	0	102.7	97.3	1098023	1.03973e+06		High	High	High	0	7.56e-05	2.86	37.96	Used
	TRUE	High	GVGAAATAVTQALNELLQHVK		FALSE	2.23382e-07	0	1	2	14	XP_003639438.1	0	2091.16	0	0.578	0.837336	0	126.7	73.3	29780646	1.72245e+07		High	High	High	0	6.948e-08	4.1	122.22	Used
	TRUE	High	GVGAAATAVTQALNELLQHVK	1xDeamidated [Q/N]	FALSE	1.25386e-06	0	1	2	6	XP_003639438.1	0	2092.14	0								Not Reliable	High	High	High	0	1.046e-05	3.35		Not Used
	TRUE	High	KFFYSDQNVDSRDPVQLNLLYVQAR	1xDeamidated [Q/N]	FALSE	0.000180074	0	1	4	9	XP_003639438.1	2	3016.52	0								No Quan Values	High	High	High	0	2.224e-05	4		Not Used
	TRUE	High	LASQAKPAAVAAENEEIGAHIK		FALSE	8.3818e-07	0	1	2	8	XP_003639438.1	0	2218.18	0	0.906	0.97587	0	104.9	95.1	5.65587e+07	5.12592e+07		High	High	High	0	1.085e-05	3.4	30.62	Used
	TRUE	High	LASQAKPAAVAAENEEIGAHIK	1xDeamidated [Q/N]	FALSE	2.00545e-05	0	1	2	11	XP_003639438.1	0	2219.17	0	0.93	0.979956	0	103.6	96.4	4.20957e+06	3.91628e+06		High	High	High	0	3.373e-06	3.44	31.96	Used
	TRUE	High	LAQAAQSSVATITR	1xDeamidated [Q]	FALSE	2.21789e-05	0	1	2	6	XP_003639438.1	0	1417.76	0	0.45	0.69043	0	137.9	62.1	2.89664e+06	1.30433e+06		High	High	High	0	3.677e-06	3.4	25.87	Used
	TRUE	High	LAQAAQSSVATITR		FALSE	5.79304e-06	0	1	2	8	XP_003639438.1	0	1416.78	0	0.27	0.298602	0	157.5	42.5	2.42482e+07	6.5397e+06		High	High	High	0	1.157e-06	3.9	22.55	Used
	TRUE	High	VLGEAMTGISQNAKNGNLPEFGEAIATASK	2xDeamidated [Q/N]; 1xOxidation [M6]	FALSE	6.49175e-05	0	1	2	3	XP_003639438.1	1	3036.48	0								No Quan Values	High	High	High	0	9.287e-06	4.79		Not Used
	TRUE	High	VLGEAMTGISQNAK	1xOxidation [M6]	FALSE	0.00175115	0	1	2	4	XP_003639438.1	0	1434.73	0	0.32	0.458	0	151.5	48.5	681467	217991		High	High	High	0.0001485	0.0003182	3.38	17.58	Used
	TRUE	High	VLGEAMTGISQNAK		FALSE	7.88869e-06	0	1	2	2	XP_003639438.1	0	1418.73	0	0.581	0.839139	0	126.5	73.5	4.29218e+06	2.4923e+06		High	High	High	0	1.504e-06	3.74	28.58	Used
	TRUE	High	TEDSGLQSQVIAAATQCALSTSQLVACTK	2xCarbamidomethyl [C17; C27]; 1xDeamidated [Q]	FALSE	5.75293e-05	0	1	2	14	XP_003639438.1	0	3039.46	0	100	9.75497e-17			200		405666		High	High	High	0	8.349e-06	5.48	93.19	Used
	TRUE	High	TEDSGLQSQVIAAATQCALSTSQLVACTK	2xCarbamidomethyl [C17; C27]	FALSE	6.49472e-07	0	1	2	8	XP_003639438.1	0	3038.48	0	0.576	0.835662	0	126.9	73.1	5.58104e+06	3.21457e+06		High	High	High	0	1.742e-07	5.41	93.26	Used
	TRUE	High	QELAVFCSPEPPAK	1xCarbamidomethyl [C7]	FALSE	0.00114769	0	1	2	2	XP_003639438.1	0	1572.77	0	1.032	0.99182	0	98.4	101.6	896226	924824		High	High	High	0	0.0001042	2.65	40.6	Used
	TRUE	High	QAAASATQTIAAAQHAASTPK		FALSE	9.97535e-05	0	1	2	7	XP_003639438.1	0	1995.03	0	0.686	0.89828	0	118.6	81.4	44814778	3.07426e+07		High	High	High	0	1.34e-05	3.39	30.68	Used
	TRUE	High	QAAASATQTIAAAQHAASTPK	1xDeamidated [Q]	FALSE	0.00012702	0	1	2	8	XP_003639438.1	0	1996.01	0	0.817	0.959098	0	110.1	89.9	4.98306e+06	4.07049e+06		High	High	High	0	4.775e-05	3.32	31.86	Used
	TRUE	High	TLAESALQLLYTAK	1xDeamidated [Q8]	FALSE	0.000871707	0	1	2	1	XP_003639438.1	0	1522.84	0								No Quan Values	High	Not Found	High	0	8.346e-05	3.26		Not Used
	TRUE	High	QVAASTAQLLVACK	1xCarbamidomethyl [C13]	FALSE	1.16435e-05	0	1	5	9	XP_003639438.1	0	1459.79	0	0.696	0.90237	0	118	82	1.41274e+07	9.82696e+06		High	High	High	0	2.11e-06	3.6	37.5	Used
	TRUE	High	TLAESALQLLYTAK		FALSE	5.56437e-06	0	1	2	10	XP_003639438.1	0	1521.85	0	0.697	0.902642	0	117.8	82.2	1.8983e+07	13232850		High	High	High	0	1.862e-06	3.6	86.62	Used
	TRUE	High	QNLLQAAGNVGQASGELLQQIGESDTDPHFQDVLMQLAK	1xDeamidated [Q/N]	FALSE	6.80405e-05	0	1	1	5	XP_003639438.1	0	4165.05	0								No Quan Values	High	High	High	0	4.466e-05	4.25		Not Used
	TRUE	High	QNLLQAAGNVGQASGELLQQIGESDTDPHFQDVLMQLAK	2xDeamidated [Q/N]	FALSE	5.2019e-05	0	1	1	8	XP_003639438.1	0	4166.03	0								No Quan Values	High	High	High	0	0.000125	4.05		Not Used
	TRUE	High	QNLLQAAGNVGQASGELLQQIGESDTDPHFQDVLMQLAK	1xOxidation [M35]	FALSE	3.5977e-07	0	1	1	5	XP_003639438.1	0	4180.06	0	0.553	0.8156	0	128.8	71.2	6933024	3.83313e+06		High	High	High	0	1.048e-07	4.82	111.73	Used
	TRUE	High	QNLLQAAGNVGQASGELLQQIGESDTDPHFQDVLMQLAK	1xDeamidated [Q/N]; 1xOxidation [M35]	FALSE	1.24574e-07	0	1	1	21	XP_003639438.1	0	4181.05	0	0.6	0.852006	0	125	75	5.52785e+06	3.31505e+06		High	High	High	0	6.254e-08	5.98	111.75	Used
	TRUE	High	QNLLQAAGNVGQASGELLQQIGESDTDPHFQDVLMQLAK	2xDeamidated [Q]; 1xOxidation [M35]	FALSE	4.19641e-05	0	1	1	10	XP_003639438.1	0	4182.03	0	0.01	9.75497e-17		200		407146			High	High	High	0	1.961e-05	4.74	115.13	Used
	TRUE	High	QNLLQAAGNVGQASGELLQQIGESDTDPHFQDVLMQLAK	3xDeamidated [Q]; 1xOxidation [M35]	FALSE	9.08065e-05	0	1	1	5	XP_003639438.1	0	4183.01	0								Not Reliable	High	Not Found	High	0.0001485	0.0002552	4.02		Not Used
	TRUE	High	SNTSPEELGPLANQLTSDYGR		FALSE	1.15656e-05	0	1	2	5	XP_003639438.1	0	2249.07	0	0.681	0.89828	0	119	81	7.17159e+06	4.8827e+06		High	High	High	0	2.095e-06	3.69	63.22	Used
	TRUE	High	SNTSPEELGPLANQLTSDYGR	1xDeamidated [N/Q]	FALSE	0.000251881	0	1	2	9	XP_003639438.1	0	2250.05	0								No Quan Values	High	High	High	0	0.0001418	3.14		Not Used
	TRUE	High	SGASGPENFQMGSMPPAQQQITSGQMHR	1xDeamidated [N/Q]; 3xOxidation [M11; M14; M26]	FALSE	8.96175e-06	0	1	2	22	XP_003639438.1	0	3008.29	0	0.886	0.9743	0	106	94	1.87427e+06	1.66105e+06		High	High	High	0	3.129e-05	4.12	26.61	Used
	TRUE	High	SGASGPENFQMGSMPPAQQQITSGQMHR	3xOxidation [M11; M14; M26]	FALSE	4.49078e-08	0	1	2	9	XP_003639438.1	0	3007.31	0	0.675	0.89828	0	119.4	80.6	1.00196e+07	6.76155e+06		High	High	High	0	1.735e-08	5.12	25.48	Used
	TRUE	High	SGASGPENFQMGSMPPAQQQITSGQMHR	2xOxidation [M11; M14]	FALSE	0.000448604	0	1	2	2	XP_003639438.1	0	2991.31	0	0.745	0.924649	0	114.6	85.4	1.05965e+06	789382		High	High	High	0.0001485	0.0003562	3.16	29.42	Used
	TRUE	High	SGASGPENFQMGSMPPAQQQITSGQMHR	1xDeamidated [Q/N]; 2xOxidation [M14; M]	FALSE	0.000108849	0	1	2	7	XP_003639438.1	0	2992.3	0								No Quan Values	High	High	High	0	1.449e-05	3.83		Not Used
	TRUE	High	SKDHFGLEGDEESTMLEDSVSPK	1xOxidation [M15]	FALSE	6.4067e-06	0	1	2	8	XP_003639438.1	1	2553.13	0	0.722	0.913511	0	116.1	83.9	4890242	3.53305e+06		High	High	High	0	2.269e-05	4.49	38.13	Used
	TRUE	High	SKDHFGLEGDEESTMLEDSVSPKK	1xOxidation [M15]	FALSE	0.00152112	0	1	2	1	XP_003639438.1	2	2681.22	0								No Quan Values	Not Found	High	High	0	0.0001296	2.2		Not Used
	TRUE	High	TVTDMLMTICAR	1xCarbamidomethyl [C10]; 2xOxidation [M5; M7]	FALSE	0.000662061	0	1	2	10	XP_003639438.1	0	1443.66	0	2.246	0.684321	0	61.6	138.4	3.28969e+06	7.39023e+06		High	High	High	0.0001092	0.0001715	2.67	32.15	Used
	TRUE	High	NLGTALAELR		FALSE	0.000793555	0	1	2	4	XP_003639438.1	0	1057.6	0	0.603	0.854318	0	124.8	75.2	8488422	5.1178e+06		High	High	High	0	0.0001049	2.68	47.97	Used
	TRUE	High	TMQFEPSTMVYDACR	1xCarbamidomethyl [C14]; 2xOxidation [M2; M9]	FALSE	0.000482973	0	1	2	5	XP_003639438.1	0	1867.77	0	1.238	0.953763	0	89.4	110.6	4.01279e+06	4.96637e+06		High	High	High	0	8.768e-05	3.07	32.21	Used
	TRUE	High	TMLESAGGLIQTAR	1xOxidation [M2]	FALSE	2.80587e-06	0	1	2	8	XP_003639438.1	0	1463.75	0	0.991	0.997349	0	100.4	99.6	1.48371e+07	1.47048e+07		High	High	High	0	6.184e-07	3.79	34.04	Used
	TRUE	High	TMLESAGGLIQTAR		FALSE	9.0199e-05	0	1	2	3	XP_003639438.1	0	1447.76	0	0.362	0.52033	0	146.8	53.2	3.11055e+06	1.12674e+06		High	High	High	0	1.231e-05	2.88	44.94	Used
	TRUE	High	NGNLPEFGEAIATASK	1xDeamidated [N]	FALSE	0.000106679	0	1	2	8	XP_003639438.1	0	1619.79	0	0.661	0.889466	0	120.4	79.6	2.24976e+06	1.48777e+06		High	High	High	0	3.544e-05	3.45	60.29	Used
	TRUE	High	TLSHPQQMALLDQTR	1xDeamidated [Q]; 1xOxidation [M8]	FALSE	0.000722406	0	1	2	7	XP_003639438.1	0	1755.87	0	0.539	0.807415	0	130	70	432006	232786		High	High	High	0	7.152e-05	2.52	26	Used
	TRUE	High	TLSHPQQMALLDQTR	1xOxidation [M8]	FALSE	1.11115e-06	0	1	2	9	XP_003639438.1	0	1754.89	0	0.536	0.799885	0	130.2	69.8	9.44474e+06	5.06065e+06		High	High	High	0	1.229e-05	3.53	23.88	Used
	TRUE	High	TLSHPQQMALLDQTR		FALSE	0.000957551	0	1	2	4	XP_003639438.1	0	1738.89	0	0.705	0.906891	0	117.3	82.7	4.16825e+06	2.93987e+06		High	High	High	0	8.984e-05	2.65	34.67	Used
	TRUE	High	MVAAATNNLCEAANAAVQGHASQEK	1xCarbamidomethyl [C10]; 1xOxidation [M1]	FALSE	9.71109e-05	0	1	2	3	XP_003639438.1	0	2572.19	0	0.982	0.993774	0	100.9	99.1	8260423	8.11111e+06		High	High	High	0	1.311e-05	3.36	38.32	Used
	TRUE	High	MVAAATNNLCEAANAAVQGHASQEK	1xCarbamidomethyl [C10]; 1xDeamidated [Q/N]; 1xOxidation [M1]	FALSE	0.0014035	0	1	2	11	XP_003639438.1	0	2573.17	0	0.691	0.89828	0	118.3	81.7	278022	192123		High	High	High	0.0001092	0.000184	3.93	22.02	Used
	TRUE	High	MVAAATNNLCEAANAAVQGHASQEK	1xCarbamidomethyl [C10]; 2xDeamidated [N/Q]; 1xOxidation [M1]	FALSE	8.6059e-05	0	1	2	5	XP_003639438.1	0	2574.16	0								Not Reliable	High	High	High	0	1.178e-05	3.62		Not Used
	TRUE	High	MVGGIAQIIAAQEEMLR	2xOxidation [M1; M15]	FALSE	8.55041e-06	0	1	2	3	XP_003639438.1	0	1861.95	0								No Quan Values	High	High	High	0	1.617e-06	3.44		Not Used
	TRUE	High	MVGGIAQIIAAQEEMLR	1xDeamidated [Q]; 2xOxidation [M1; M15]	FALSE	1.59624e-05	0	1	2	2	XP_003639438.1	0	1862.94	0								Not Reliable	Not Found	High	High	0	1.542e-05	2.49		Not Used
	TRUE	High	VSQMAQYFEPLTLAAVGAASK	1xOxidation [M4]	FALSE	1.04601e-06	0	1	2	5	XP_003639438.1	0	2198.12	0	0.684	0.89828	0	118.8	81.2	9.02229e+06	6.16849e+06		High	High	High	0	2.632e-07	5.25	77.29	Used
	TRUE	High	VSQMAQYFEPLTLAAVGAASK	1xDeamidated [Q]; 1xOxidation [M4]	FALSE	2.82413e-05	0	1	2	10	XP_003639438.1	0	2199.1	0								Not Reliable	High	High	High	0	1.102e-05	4.47		Not Used
	TRUE	High	ASAGPQPLLVQSCK	1xCarbamidomethyl [C13]	FALSE	0.00173944	0	1	2	2	XP_003639438.1	0	1455.76	0	0.302	0.380706	0	153.6	46.4	6478125	1.95666e+06		High	High	High	0	0.0001465	2.09	27.69	Used
	TRUE	High	APGQLECETAIAALNSCLR	2xCarbamidomethyl [C7; C17]; 1xDeamidated [Q/N]	FALSE	6.62379e-05	0	1	2	2	XP_003639438.1	0	2074.99	0								Not Reliable	High	Not Found	High	0	9.404e-06	3.88		Not Used
	TRUE	High	APGQLECETAIAALNSCLR	2xCarbamidomethyl [C7; C17]	FALSE	0.000883483	0	1	2	2	XP_003639438.1	0	2074.01	0								No Quan Values	High	High	High	0	8.425e-05	2.36		Not Used
	TRUE	High	FGQDFSTFLEAGVEMAGQAPSQEDRAQVVSNLK	2xDeamidated [Q18; Q22]; 1xOxidation [M15]	FALSE	0.00128631	0	1	2	2	XP_003639438.1	1	3574.66	0								No Quan Values	High	High	High	0	0.0001138	4.07		Not Used
	TRUE	High	FGQDFSTFLEAGVEMAGQAPSQEDRAQVVSNLK	1xDeamidated [N/Q]; 1xOxidation [M15]	FALSE	1.20409e-05	0	1	2	18	XP_003639438.1	1	3573.68	0	100	9.75497e-17			200		795154		High	High	High	0	3.226e-06	5.15	83.29	Used
	TRUE	High	FGQDFSTFLEAGVEMAGQAPSQEDRAQVVSNLK	1xOxidation [M15]	FALSE	8.2682e-06	0	1	2	3	XP_003639438.1	1	3572.7	0	0.342	0.472374	0	149.1	50.9	1.72941e+06	591132		High	Peak Found	High	0	1.566e-06	5.11	83.4	Used
	TRUE	High	VSHVLAALQAGNR		FALSE	0.000137674	0	1	2	6	XP_003639438.1	0	1335.75	0	0.619	0.870248	0	123.5	76.5	1.89094e+07	11704694		High	High	High	0	1.77e-05	3.41	28.94	Used
	TRUE	High	FGQDFSTFLEAGVEMAGQAPSQEDR	1xDeamidated [Q]; 1xOxidation [M15]	FALSE	2.8438e-06	0	1	2	11	XP_003639438.1	0	2734.19	0								Not Reliable	High	High	High	0	6.243e-07	4.15		Not Used
	TRUE	High	FGQDFSTFLEAGVEMAGQAPSQEDR	1xOxidation [M15]	FALSE	2.84505e-08	0	1	2	8	XP_003639438.1	0	2733.21	0	0.661	0.88904	0	120.4	79.6	2.40472e+06	1.58893e+06		High	High	High	0	1.174e-08	4.02	81.18	Used
	TRUE	High	FFYSDQNVDSRDPVQLNLLYVQAR	1xDeamidated [N/Q]	FALSE	4.05791e-05	0	1	4	7	XP_003639438.1	1	2888.42	0								Not Reliable	High	High	High	0	2.369e-05	4.99		Not Used
	TRUE	High	FFYSDQNVDSRDPVQLNLLYVQAR		FALSE	0.000499454	0	1	4	4	XP_003639438.1	1	2887.44	0	1.323	0.930056	0	86.1	113.9	2.13728e+06	2.82732e+06		High	High	High	0.0004718	0.007423	3.02	78.61	Used
	TRUE	High	VSQMAQYFEPLTLAAVGAASK		FALSE	0.00055981	0	1	2	4	XP_003639438.1	0	2182.12	0	0.486	0.737591	0	134.6	65.4	1.29355e+06	628555		High	High	High	0	0.0001145	3.84	91.4	Used
	TRUE	High	VSQMAQYFEPLTLAAVGAASK	1xDeamidated [Q]	FALSE	5.79432e-07	0	1	2	4	XP_003639438.1	0	2183.11	0								No Quan Values	High	High	High	0	1.577e-07	4.78		Not Used
	TRUE	High	AQEACGPLEMDSALSVVQNLER	1xCarbamidomethyl [C5]	FALSE	0.000303956	0	1	2	1	XP_003639438.1	0	2417.14	0								No Quan Values	High	Not Found	High	0	3.477e-05	2.9		Not Used
	TRUE	High	AQEACGPLEMDSALSVVQNLER	1xCarbamidomethyl [C5]; 1xDeamidated [N/Q]	FALSE	0.00123557	0	1	2	2	XP_003639438.1	0	2418.13	0								Not Reliable	High	Not Found	High	0	0.0001104	3.06		Not Used
	TRUE	High	AQEACGPLEMDSALSVVQNLER	1xCarbamidomethyl [C5]; 1xOxidation [M10]	FALSE	5.49017e-06	0	1	2	5	XP_003639438.1	0	2433.14	0	0.629	0.876904	0	122.8	77.2	3.3168e+06	2.08592e+06		High	High	High	0	0.0001112	3.05	73.49	Used
	TRUE	High	AQEACGPLEMDSALSVVQNLER	1xCarbamidomethyl [C5]; 1xDeamidated [Q/N]; 1xOxidation [M10]	FALSE	3.14432e-05	0	1	2	7	XP_003639438.1	0	2434.12	0								Not Reliable	High	High	High	0	0.0001365	2.93		Not Used
	TRUE	High	AVEGCVSASQAATEDGQLLR	1xCarbamidomethyl [C5]	FALSE	9.2097e-08	0	1	2	13	XP_003639438.1	0	2061.99	0	1.026	0.992262	0	98.7	101.3	1.26416e+07	1.29675e+07		High	High	High	0	3.224e-08	4.53	36.64	Used
	TRUE	High	AVEGCVSASQAATEDGQLLR	1xCarbamidomethyl [C5]; 1xDeamidated [Q]	FALSE	1.14114e-05	0	1	2	12	XP_003639438.1	0	2062.97	0								No Quan Values	High	High	High	0	2.066e-06	4.54		Not Used
	TRUE	High	EGISQEALHTQMLTAVQEISHLIEPLASAAR	1xDeamidated [Q]; 1xOxidation [M12]	FALSE	1.82558e-05	0	1	2	9	XP_003639438.1	0	3360.71	0	1.133	0.9743	0	93.8	106.2	5702479	6.45899e+06		High	High	High	0	1.092e-05	5.11	108.56	Used
	TRUE	High	EGISQEALHTQMLTAVQEISHLIEPLASAAR	1xOxidation [M12]	FALSE	8.15794e-06	0	1	2	4	XP_003639438.1	0	3359.73	0	0.407	0.624831	0	142.1	57.9	4660514	1896667		High	Peak Found	High	0	2.687e-06	3.67	108.57	Used
	TRUE	High	EGISQEALHTQMLTAVQEISHLIEPLASAAR	1xDeamidated [Q]	FALSE	5.27221e-05	0	1	2	3	XP_003639438.1	0	3344.72	0								No Quan Values	High	High	High	0	7.733e-06	4.57		Not Used
	TRUE	High	EGISQEALHTQMLTAVQEISHLIEPLASAAR		FALSE	1.31388e-05	0	1	2	3	XP_003639438.1	0	3343.73	0	0.575	0.835662	0	127	73	1.15363e+06	663773		High	High	High	0	2.344e-06	3.55	131.59	Used
	TRUE	High	AVSSAIAQLLGEVAQGNENYAGIAAR		FALSE	5.45705e-09	0	1	2	11	XP_003639438.1	0	2573.33	0	0.616	0.864985	0	123.7	76.3	3.99614e+07	2.4629e+07		High	High	High	0	2.823e-09	5.17	103.31	Used
	TRUE	High	EADESLNFEEQILEAAK		FALSE	1.0183e-06	0	1	2	4	XP_003639438.1	0	1935.92	0	0.756	0.929628	0	113.9	86.1	4.7276e+06	3.57173e+06		High	High	High	0	3.138e-07	4.46	77.2	Used
	TRUE	High	AVSSAIAQLLGEVAQGNENYAGIAAR	1xDeamidated [N/Q]	FALSE	1.75429e-07	0	1	2	33	XP_003639438.1	0	2574.32	0	0.487	0.737591	0	134.5	65.5	1.95614e+06	952360		High	High	High	0	5.651e-08	6.19	104.7	Used
	TRUE	High	AVSSAIAQLLGEVAQGNENYAGIAAR	2xDeamidated [Q8; Q15]	FALSE	2.82539e-07	0	1	2	5	XP_003639438.1	0	2575.3	0								No Quan Values	High	High	High	0	8.193e-07	5.49		Not Used
	TRUE	High	ECANGYLELLDHVLLTLQKPSPELK	1xCarbamidomethyl [C2]; 1xDeamidated [Q/N]	FALSE	0.000354691	0	1	2	5	XP_003639438.1	0	2881.5	0								Not Reliable	High	High	High	0	3.967e-05	3.06		Not Used
	TRUE	High	AVTDSINQLITMCTQQAPGQK	1xCarbamidomethyl [C13]; 1xOxidation [M12]	FALSE	0.000463912	0	1	2	5	XP_003639438.1	0	2320.13	0	1.007	0.997709	0	99.6	100.4	1.40049e+06	1.4106e+06		High	High	High	0	4.961e-05	2.38	60.94	Used
	TRUE	High	AVTDSINQLITMCTQQAPGQK	1xCarbamidomethyl [C13]; 1xDeamidated [Q/N]; 1xOxidation [M12]	FALSE	0.000312227	0	1	2	9	XP_003639438.1	0	2321.11	0								Not Reliable	High	High	High	0	0.0001116	3.85		Not Used
	TRUE	High	ANQAIQMACQSLGEPGCTQAQVLSAATIVAK	2xCarbamidomethyl [C9; C17]; 1xDeamidated [Q/N]; 1xOxidation [M7]	FALSE	0.00068926	0	1	2	7	XP_003639438.1	0	3233.56	0	0.01	9.75497e-17		200		2477090			High	High	High	0.000303	0.002605	3.54	68.03	Used
	TRUE	High	EQGVEEHETLLLR		FALSE	0.00126069	0	1	2	5	XP_003639438.1	0	1552.8	0	1.762	0.828457	0	72.4	127.6	4.68485e+06	8.25552e+06		High	High	High	0.0002019	0.001001	2.35	32.02	Used
	TRUE	High	VVAPTISSPVCQEQLVEAGR	1xCarbamidomethyl [C11]; 1xDeamidated [Q]	FALSE	8.1014e-05	0	1	2	14	XP_003639438.1	0	2141.09	0								Not Reliable	High	High	High	0	2.165e-05	4.11		Not Used
	TRUE	High	ASVPTIQDQASAMQLSQCAK	1xCarbamidomethyl [C18]; 1xDeamidated [Q14]	FALSE	0.00163757	0	1	2	1	XP_003639438.1	0	2135.01	0								Not Reliable	High	Not Found	High	0	0.0001369	3.39		Not Used
	TRUE	High	ASVPTIQDQASAMQLSQCAK	1xCarbamidomethyl [C18]; 1xOxidation [M13]	FALSE	0.000274846	0	1	2	4	XP_003639438.1	0	2150.02	0	1.142	0.9743	0	93.4	106.6	1.4404e+07	16455078		High	High	High	0.0002019	0.001578	2.53	33.54	Used
	TRUE	High	ASVPTIQDQASAMQLSQCAK	1xCarbamidomethyl [C18]; 1xDeamidated [Q]; 1xOxidation [M13]	FALSE	0.000273007	0	1	2	13	XP_003639438.1	0	2151.01	0								No Quan Values	High	High	High	0.0001485	0.0007065	2.88		Not Used
	TRUE	High	ERIPEALAGPPSDFGLFLSDDDPKK		FALSE	0.000284225	0	1	2	4	XP_003639438.1	2	2714.37	0	0.763	0.933592	0	113.4	86.6	2.75778e+06	2.10507e+06		High	High	High	0	9.21e-05	5.49	76.26	Used
	TRUE	High	VVAPTISSPVCQEQLVEAGR	1xCarbamidomethyl [C11]	FALSE	1.95276e-06	0	1	2	9	XP_003639438.1	0	2140.11	0	0.831	0.969982	0	109.3	90.7	1.23301e+07	10241246		High	High	High	0	4.503e-07	3.62	49.17	Used
	TRUE	High	AVASAAAALVLK		FALSE	0.00148086	0	1	2	8	XP_003639438.1	0	1084.67	0	0.925	0.978327	0	103.9	96.1	2.48772e+07	23001053		High	High	High	0.0001485	0.0003387	3.64	42.3	Used
	TRUE	High	ELMEEKKEEVTGTLR		FALSE	0.000136753	0	1	2	4	XP_003639438.1	2	1791.92	0	3.283	0.387493	0	46.7	153.3	806384	2.64726e+06		High	High	High	0	4.536e-05	2.63	21.99	Used
	TRUE	High	AVAAGNSCRQEDVIATANLSR	1xCarbamidomethyl [C8]	FALSE	6.94411e-06	0	1	5	3	XP_003639438.1	1	2203.09	0	0.68	0.89828	0	119.1	80.9	4.45145e+06	3.02649e+06		High	High	High	0	1.348e-06	4.78	30.05	Used
	TRUE	High	AVAEQIPLLVQGVR		FALSE	3.38605e-06	0	1	2	10	XP_003639438.1	0	1492.88	0	0.756	0.929628	0	113.9	86.1	1.8691e+07	1.41255e+07		High	High	High	0	4.184e-06	4.04	63.39	Used
	TRUE	High	ANQAIQMACQSLGEPGCTQAQVLSAATIVAK	2xCarbamidomethyl [C9; C17]; 1xOxidation [M7]	FALSE	1.6287e-05	0	1	2	3	XP_003639438.1	0	3232.58	0	0.676	0.89828	0	119.4	80.6	3.34601e+06	2.26062e+06		High	High	High	0	2.817e-06	3.21	68.07	Used
	TRUE	High	YDQATDTILTVTENIFSSMGDAGEMVR	1xDeamidated [N/Q]; 1xOxidation [M25]	FALSE	1.08876e-05	0	1	2	3	XP_003639438.1	0	2981.34	0								No Quan Values	High	Not Found	High	0	3.612e-06	4.31		Not Used
	TRUE	High	ALGDLISATK		FALSE	0.000482973	0	1	2	3	XP_003639438.1	0	988.567	0	0.781	0.941075	0	112.3	87.7	12871365	10047713		High	High	High	0	5.13e-05	2.56	34.64	Used
	TRUE	High	YDQATDTILTVTENIFSSMGDAGEMVR	1xOxidation [M25]	FALSE	7.9399e-05	0	1	2	2	XP_003639438.1	0	2980.36	0								No Quan Values	High	Not Found	High	0	1.1e-05	3.99		Not Used
	TRUE	High	GHMPPLTSAQQALTGTINSSMQAVQAAQATLDDFDTLPPLGQDAASK	2xDeamidated [Q/N]; 2xOxidation [M3; M21]	FALSE	0.00147096	0	1	2	5	XP_003639438.1	0	4828.29	0								No Quan Values	High	High	High	0	0.0001261	4.09		Not Used
	TRUE	High	YDQATDTILTVTENIFSSMGDAGEMVR	1xDeamidated [N/Q]; 2xOxidation [M19; M25]	FALSE	4.64303e-07	0	1	2	5	XP_003639438.1	0	2997.33	0	0.01	9.75497e-17		200		2.93448e+06			High	High	High	0	1.303e-07	5.11	105.89	Used
	TRUE	High	GLAGAVSELLR		FALSE	8.32187e-05	0	1	2	7	XP_003639438.1	0	1085.63	0	0.655	0.885998	0	120.8	79.2	8.02124e+06	5254873		High	High	High	0	1.147e-05	3.11	64.19	Used
	TRUE	High	AGFLDLKDFLPK		FALSE	0.00135722	0	1	2	7	XP_003639438.1	1	1363.76	0	0.999	0.999461	0	100	100	7.3521e+06	7.34576e+06		High	High	High	0.0001485	0.0002644	2.42	85.79	Used
	TRUE	High	YDQATDTILTVTENIFSSMGDAGEMVR	2xDeamidated [Q3; N14]; 1xOxidation [M]	FALSE	0.00128631	0	1	2	2	XP_003639438.1	0	2982.32	0								No Quan Values	High	Not Found	High	0	0.000114	2.56		Not Used
	TRUE	High	YDQATDTILTVTENIFSSMGDAGEMVR	2xOxidation [M19; M25]	FALSE	1.47303e-06	0	1	2	7	XP_003639438.1	0	2996.35	0	0.702	0.903302	0	117.5	82.5	6.4779e+06	4548344		High	High	High	0	3.546e-07	4.86	105.8	Used
	TRUE	High	GSQAQPDSPSAQLALIAASQSFLQPGGK	1xDeamidated [Q]	FALSE	2.84315e-05	0	1	2	13	XP_003639438.1	0	2755.39	0								Not Reliable	High	High	High	0	6.934e-05	4.22		Not Used
	TRUE	High	GSQAQPDSPSAQLALIAASQSFLQPGGK		FALSE	1.65072e-05	0	1	2	6	XP_003639438.1	0	2754.41	0	0.473	0.725877	0	135.8	64.2	8.14666e+06	3.8495e+06		High	High	High	0	2.853e-06	3.34	92.51	Used
	TRUE	High	AAAFEDQENETVVVK		FALSE	6.80567e-06	0	1	2	12	XP_003639438.1	0	1649.8	0	0.66	0.88904	0	120.5	79.5	2.69139e+07	1.77733e+07		High	High	High	0	1.326e-05	3.1	27.95	Used
	TRUE	High	AAAFEDQENETVVVK	1xDeamidated [N9]	FALSE	0.000419485	0	1	2	6	XP_003639438.1	0	1650.79	0	0.687	0.90237	0	118.6	81.4	510538	350564		High	High	High	0	0.0001124	2.65	29.58	Used
	TRUE	High	DDILNGSHPVSFDK		FALSE	0.000788249	0	1	2	9	XP_003639438.1	0	1543.74	0	1.23	0.957261	0	89.7	110.3	7.10959e+06	8.7447e+06		High	High	High	0	7.711e-05	3.54	33.97	Used
	TRUE	High	AAAFEDQENETVVVKEK		FALSE	2.94019e-05	0	1	2	4	XP_003639438.1	1	1906.94	0	0.505	0.758536	0	132.8	67.2	1.07398e+07	5.42887e+06		High	High	High	0	1.336e-05	2.69	24.46	Used
	TRUE	High	DDILNGSHPVSFDK	1xDeamidated [N5]	FALSE	0.00120286	0	1	2	4	XP_003639438.1	0	1544.72	0	2.306	0.668194	0	60.5	139.5	358346	826258		High	High	High	0	0.000108	3.54	32.68	Used
	TRUE	High	AAAFEDQENETVVVKEK	1xDeamidated [Q7]	FALSE	0.000405643	0	1	2	1	XP_003639438.1	1	1907.92	0								Not Reliable	Not Found	High	High	0	4.419e-05	2.06		Not Used
	TRUE	High	AIAVTVQEMVTK		FALSE	0.000451624	0	1	2	3	XP_003639438.1	0	1289.71	0	0.836	0.971875	0	108.9	91.1	3069162	2566431		High	High	High	0	4.846e-05	3.38	43.06	Used
	TRUE	High	AIAVTVQEMVTK	1xOxidation [M9]	FALSE	5.34346e-05	0	1	2	7	XP_003639438.1	0	1305.71	0	0.681	0.89828	0	118.9	81.1	17715348	12072234		High	High	High	0	1.498e-05	3.52	26.73	Used
	TRUE	High	ALEATTEHIRQELAVFCSPEPPAK	1xCarbamidomethyl [C17]	FALSE	2.92052e-05	0	1	2	5	XP_003639438.1	1	2694.36	0	0.708	0.907887	0	117.1	82.9	8.47395e+06	5.9993e+06		High	High	High	0	4.655e-06	4.69	68.57	Used
	TRUE	High	ALEATTEHIRQELAVFCSPEPPAK	1xCarbamidomethyl [C17]; 1xDeamidated [Q11]	FALSE	2.18831e-05	0	1	2	4	XP_003639438.1	1	2695.34	0								Not Reliable	High	High	High	0	3.624e-06	3.88		Not Used
	TRUE	High	ALCGFTEAAAQAAYLVGVSDPNSQAGQQGLVEPTQFAR	1xCarbamidomethyl [C3]	FALSE	1.91383e-06	0	1	2	6	XP_003639438.1	0	3922.9	0	0.663	0.891336	0	120.2	79.8	1.06064e+07	7036065		High	High	High	0	4.44e-07	4.79	96.33	Used
	TRUE	High	ALCGFTEAAAQAAYLVGVSDPNSQAGQQGLVEPTQFAR	1xCarbamidomethyl [C3]; 1xDeamidated [Q/N]	FALSE	4.64201e-06	0	1	2	21	XP_003639438.1	0	3923.89	0	0.01	9.75497e-17		200		4.90948e+06			High	High	High	0	1.611e-06	5.1	96.31	Used
	TRUE	High	ALCGFTEAAAQAAYLVGVSDPNSQAGQQGLVEPTQFAR	1xCarbamidomethyl [C3]; 2xDeamidated [Q/N]	FALSE	4.11461e-07	0	1	2	12	XP_003639438.1	0	3924.87	0								No Quan Values	High	High	High	0	2.633e-07	7.06		Not Used
	TRUE	High	VMVTNVTSLLK	1xOxidation [M2]	FALSE	0.000586734	0	1	5	5	XP_003639438.1	0	1220.69	0	0.747	0.926346	0	114.5	85.5	8512804	6.35848e+06		High	High	High	0	9.465e-05	2.16	49.12	Used
	TRUE	High	DKAPGQLECETAIAALNSCLR	2xCarbamidomethyl [C9; C19]	FALSE	6.07174e-06	0	1	2	4	XP_003639438.1	1	2317.13	0	0.432	0.665292	0	139.6	60.4	3.09749e+06	1.33871e+06		High	High	High	0	9.036e-06	4.04	66.14	Used
	TRUE	High	DKAPGQLECETAIAALNSCLR	2xCarbamidomethyl [C9; C19]; 1xDeamidated [N/Q]	FALSE	0.000229291	0	1	2	5	XP_003639438.1	1	2318.11	0								No Quan Values	High	High	High	0.000303	0.003282	4.17		Not Used
	TRUE	High	ALSTDPAAPNLK		FALSE	5.90949e-05	0	1	2	1	XP_003639438.1	0	1197.65	0	0.176	0.0937277	0	170	30	4819497	848997		High	Peak Found	High	0	8.532e-06	2.41	22.17	Used
	TRUE	High	DLDQASLAAVSQQLAPR		FALSE	1.07424e-05	0	1	2	5	XP_003639438.1	0	1782.93	0	0.681	0.89828	0	118.9	81.1	5.07796e+06	3.46033e+06		High	High	High	0	0.0001367	3.25	64.78	Used
	TRUE	High	AATAPLLEAVDNLSAFASNPEFSSIPAQISPEGR	1xDeamidated [Q/N]	FALSE	0.000237117	0	1	2	10	XP_003639438.1	0	3471.73	0	8.739	0.0182869	0	20.5	179.5	883468	7720573		High	High	High	0.0001092	0.0001504	4.76	117.74	Used
	TRUE	High	AATAPLLEAVDNLSAFASNPEFSSIPAQISPEGR		FALSE	1.60699e-05	0	1	2	9	XP_003639438.1	0	3470.74	0	0.606	0.857693	0	124.5	75.5	27990776	1.69759e+07		High	High	High	0	2.776e-06	4.01	116.95	Used
	TRUE	High	GSQAQPDSPSAQLALIAASQSFLQPGGK	2xDeamidated [Q20; Q]	FALSE	0.00233628	0.000331607	1	2	3	XP_003639438.1	0	2756.37	0								Not Reliable	High	Not Found	High	0.001436	0.01732	3.76		Not Used
	TRUE	High	EGAETFADHREGILK		FALSE	0.00270748	0.000331607	1	2	2	XP_003639438.1	1	1672.83	0	0.547	0.810993	0	129.3	70.7	1.4281e+06	781152		High	High	High	0.0001092	0.0001967	3.23	25.46	Used
	TRUE	High	VLVQNAAGSQEK		FALSE	0.00205687	0.000331607	1	2	1	XP_003639438.1	0	1243.66	0	0.564	0.822759	0	127.9	72.1	78057.5	44034.8		High	Peak Found	High	0.0001092	0.0001623	2.07	13.23	Used
	TRUE	High	AGALQCSPSDAYTK	1xCarbamidomethyl [C6]	FALSE	0.00197578	0.000331607	1	2	1	XP_003639438.1	0	1468.67	0	0.01	9.75497e-17		200		104761			High	Not Found	High	0.0001092	0.0001578	2.85	17.67	Used
	TRUE	High	TLREQGVEEHETLLLR		FALSE	0.00187259	0.000331607	1	2	10	XP_003639438.1	1	1923.03	0	0.898	0.9743	0	105.4	94.6	1.86399e+07	1.67314e+07		High	High	High	0.0001485	0.0004858	2.86	33.81	Used
	TRUE	High	QNLLQAAGNVGQASGELLQQIGESDTDPHFQDVLMQLAK		FALSE	0.0018353	0.000331607	1	1	2	XP_003639438.1	0	4164.07	0								No Quan Values	High	Not Found	High	0.0001092	0.0001491	3.64		Not Used
	TRUE	High	GHMPPLTSAQQALTGTINSSMQAVQAAQATLDDFDTLPPLGQDAASK	1xDeamidated [Q]; 2xOxidation [M3; M21]	FALSE	0.00212699	0.000331607	1	2	4	XP_003639438.1	0	4827.31	0	0.694	0.901064	0	118.1	81.9	2.19937e+06	1.52626e+06		High	High	High	0.0001092	0.0001664	3.45	105.88	Used
	TRUE	High	QVAASTAQLLVACK	1xCarbamidomethyl [C13]; 1xDeamidated [Q1]	FALSE	0.0044154	0.000480221	1	5	1	XP_003639438.1	0	1460.78	0								Not Reliable	Not Found	High	High	0.0001485	0.000275	1.97		Not Used
	TRUE	High	ANQAIQMACQSLGEPGCTQAQVLSAATIVAK	2xCarbamidomethyl [C9; C17]; 1xDeamidated [Q]	FALSE	0.0044154	0.000480221	1	2	2	XP_003639438.1	0	3217.56	0								No Quan Values	High	Not Found	High	0.0001485	0.000274	4.29		Not Used
	TRUE	High	QEDVIATANLSR		FALSE	0.0124476	0.000480221	1	5	4	XP_003639438.1	0	1316.68	0	0.318	0.41947	0	151.7	48.3	1.09309e+07	3.48119e+06		High	High	High	0.0001485	0.0006566	2.67	27.35	Used
	TRUE	High	ALDYYMLR	1xOxidation [M6]	FALSE	0.00402019	0.000480221	1	2	4	XP_003639438.1	0	1060.51	0	1.386	0.913511	0	83.8	116.2	7.26264e+06	1.00628e+07		High	High	High	0.0002019	0.0009759	2.14	35.3	Used
	TRUE	High	AVAAGNSCRQEDVIATANLSR	1xCarbamidomethyl [C8]; 1xDeamidated [N/Q]	FALSE	0.00682246	0.000480221	1	5	5	XP_003639438.1	1	2204.07	0								No Quan Values	Not Found	High	High	0.0001485	0.0008486	2.75		Not Used
	TRUE	High	NGNLPEFGEAIATASK		FALSE	0.0035161	0.000480221	1	2	3	XP_003639438.1	0	1618.81	0	0.01	9.75497e-17		200		4492393			High	Not Found	High	0.0001485	0.0002355	3.32	51.74	Used
	TRUE	High	ASVPTIQDQASAMQLSQCAK	1xCarbamidomethyl [C18]; 2xDeamidated [Q]; 1xOxidation [M13]	FALSE	0.0129559	0.000480221	1	2	3	XP_003639438.1	0	2151.99	0								No Quan Values	High	High	High	0.002664	0.03512	2.43		Not Used
	TRUE	High	MVAAATNNLCEAANAAVQGHASQEK	1xCarbamidomethyl [C10]; 1xDeamidated [N]	FALSE	0.00386182	0.000480221	1	2	3	XP_003639438.1	0	2557.18	0								Not Reliable	High	High	High	0.0001485	0.0002501	4.11		Not Used
	TRUE	High	MVGGIAQIIAAQEEMLRK	1xDeamidated [Q12]; 2xOxidation [M1; M15]	FALSE	0.00340026	0.000480221	1	2	1	XP_003639438.1	1	1991.03	0								Not Reliable	High	Not Found	High	0.0001485	0.0002301	2.14		Not Used
	TRUE	High	TLSHPQQMALLDQTR	2xDeamidated [Q7; Q13]; 1xOxidation [M8]	FALSE	0.0044154	0.000480221	1	2	2	XP_003639438.1	0	1756.85	0								No Quan Values	High	High	High	0.0001485	0.0002745	3.25		Not Used
	TRUE	High	ASAGPQPLLVQSCK	1xCarbamidomethyl [C13]; 1xDeamidated [Q]	FALSE	0.0160352	0.000480221	1	2	3	XP_003639438.1	0	1456.75	0								No Quan Values	High	Not Found	High	0.000303	0.004325	2.39		Not Used
	TRUE	High	AATAPLLEAVDNLSAFASNPEFSSIPAQISPEGR	2xDeamidated [N19; Q/N]	FALSE	0.00655401	0.000480221	1	2	5	XP_003639438.1	0	3472.71	0								No Quan Values	High	High	High	0.0001485	0.000688	3.96		Not Used
	TRUE	High	VQELGHGCAALVTK	1xCarbamidomethyl [C8]	FALSE	0.00370968	0.000480221	1	2	2	XP_003639438.1	0	1482.77	0	0.378	0.562889	0	145.1	54.9	1.25317e+06	473882		High	High	High	0.0001485	0.0002436	2.07	21.39	Used
	TRUE	High	ACEFAGFQCQIQFGPHNEQK	2xCarbamidomethyl [C2; C9]; 1xDeamidated [Q]	FALSE	0.0155101	0.000480221	1	2	2	XP_003639438.1	0	2397.04	0								Not Reliable	Not Found	High	High	0.00124	0.0136	2.6		Not Used
	TRUE	High	VMVTNVTSLLK		FALSE	0.00719752	0.000480221	1	5	1	XP_003639438.1	0	1204.7	0	0.628	0.876904	0	122.9	77.1	1.35916e+06	853502		High	Peak Found	High	0.0001485	0.0003936	1.88	55.32	Used
	TRUE	High	AAMEPIVISAK	1xOxidation [M3]	FALSE	0.0134847	0.000480221	1	2	1	XP_003639438.1	0	1145.62	0	0.224	0.187451	0	163.4	36.6	1.42593e+06	319577		Peak Found	High	High	0.0001485	0.000714	2.3	25.22	Used
	TRUE	High	VLGEAMTGISQNAK	1xDeamidated [Q11]; 1xOxidation [M6]	FALSE	0.00785128	0.000480221	1	2	1	XP_003639438.1	0	1435.71	0	0.01	9.75497e-17		200		69634.1			High	Not Found	High	0.0001485	0.0004233	2.46	18.63	Used
	TRUE	High	VLGEAMTGISQNAKNGNLPEFGEAIATASK	1xDeamidated [N]; 1xOxidation [M6]	FALSE	0.00444507	0.000480221	1	2	3	XP_003639438.1	1	3035.5	0	1.044	0.991149	0	97.8	102.2	578662	604143		High	Peak Found	High	0.0001485	0.0003029	2.72	60.12	Used
	TRUE	High	KFFYSDQNVDSR		FALSE	0.0126992	0.000480221	1	4	1	XP_003639438.1	1	1505.7	0								No Quan Values	Not Found	High	High	0.0001485	0.0006692	1.94		Not Used
	TRUE	High	IPEALAGPPSDFGLFLSDDDPK		FALSE	0.00293421	0.000480221	1	2	2	XP_003639438.1	0	2301.13	0								No Quan Values	High	High	High	0.0001485	0.0008215	3.19		Not Used
	TRUE	High	ECANGYLELLDHVLLTLQKPSPELK	1xCarbamidomethyl [C2]	FALSE	0.00291461	0.000480221	1	2	3	XP_003639438.1	0	2880.52	0	0.601	0.852006	0	124.9	75.1	2.35477e+06	1.41564e+06		High	High	High	0.0001485	0.0002236	2.71	121.72	Used
	TRUE	High	ECANGYLELLDHVLLTLQKPSPELK	1xCarbamidomethyl [C2]; 2xDeamidated [N4; Q18]	FALSE	0.0118007	0.000480221	1	2	2	XP_003639438.1	0	2882.49	0								No Quan Values	High	High	High	0.0002602	0.002055	2.66		Not Used
	TRUE	High	TYGVSFFLVK		FALSE	0.00410179	0.000480221	1	4	3	XP_003639438.1	0	1160.64	0	1.269	0.94564	0	88.1	111.9	1.70294e+06	2161424		High	High	High	0.000303	0.003114	1.63	69.77	Used
	TRUE	High	ILAQATSDLVNAIKADAEGESDLENSRK		FALSE	0.00518521	0.000480221	1	2	2	XP_003639438.1	2	2958.5	0	0.319	0.421017	0	151.6	48.4	2.12033e+06	676760		High	Peak Found	High	0.0001485	0.0003066	3.57	79.5	Used
	TRUE	High	LLSDSLPPSTGTFQEAQSR	1xDeamidated [Q]	FALSE	0.00373462	0.000480221	1	2	5	XP_003639438.1	0	2035	0								No Quan Values	High	High	High	0.0001485	0.0002448	2.91		Not Used
	TRUE	High	ELMEEKKEEVTGTLR	1xOxidation [M3]	FALSE	0.0100537	0.000480221	1	2	2	XP_003639438.1	2	1807.91	0	10.355	0.00830546	0	17.6	182.4	179558	1.85936e+06		High	High	High	0.0001485	0.0005283	2.44	15.62	Used
	TRUE	High	AGALQCSPSDAYTKK	1xCarbamidomethyl [C6]	FALSE	0.0250199	0.000666919	1	2	2	XP_003639438.1	1	1596.77	0	0.247	0.286251	0	160.4	39.6	231366	57204.1		High	Peak Found	High	0.0002019	0.001576	2.36	15.33	Used
	TRUE	High	SIAAATSALVK		FALSE	0.0240456	0.000666919	1	5	5	XP_003639438.1	0	1031.61	0	0.423	0.654383	0	140.5	59.5	1.60816e+07	6.80418e+06		High	High	High	0.0002019	0.001481	2.15	29.46	Used
	TRUE	High	EVANSTANLVK		FALSE	0.0234169	0.000666919	1	5	1	XP_003639438.1	0	1145.62	0	0.395	0.634348	0	143.4	56.6	114667	45248.9		Peak Found	High	High	0.0002019	0.001425	1.49	16.48	Used
	TRUE	High	VEHGSVALPAIMR	1xOxidation [M12]	FALSE	0.0180756	0.000666919	1	2	5	XP_003639438.1	0	1395.74	0	1.499	0.893446	0	80	120	2274747	3.40953e+06		High	High	High	0.0002019	0.001626	2.83	30.56	Used
	TRUE	High	VLVEDTKVLVQNAAGSQEK	1xDeamidated [Q17]	FALSE	0.024528	0.000666919	1	2	1	XP_003639438.1	1	2029.08	0								Not Reliable	High	Not Found	High	0.0002019	0.001529	3.16		Not Used
	TRUE	High	TLREQGVEEHETLLLR	1xDeamidated [Q5]	FALSE	0.0250199	0.000666919	1	2	1	XP_003639438.1	1	1924.01	0								Not Reliable	High	Not Found	High	0.0002019	0.001575	2.3		Not Used
	TRUE	High	AVAEQIPLLVQGVR	1xDeamidated [Q]	FALSE	0.0210598	0.000666919	1	2	4	XP_003639438.1	0	1493.87	0								No Quan Values	High	High	High	0.0002019	0.001235	2.98		Not Used
	TRUE	High	AVTDSINQLITMCTQQAPGQKECDNALR	2xCarbamidomethyl [C13; C23]; 1xDeamidated [Q/N]; 1xOxidation [M12]	FALSE	0.0214832	0.000666919	1	2	3	XP_003639438.1	1	3179.48	0								No Quan Values	High	Not Found	High	0.0002602	0.002233	3.25		Not Used
	TRUE	High	RVAGSVTELIQAAEAMK	1xOxidation [M16]	FALSE	0.0198382	0.000666919	1	2	2	XP_003639438.1	1	1789.95	0								No Quan Values	High	Not Found	High	0.0002019	0.001138	3.23		Not Used
	TRUE	High	EAAYHPEVAPDVR		FALSE	0.019318	0.000666919	1	2	4	XP_003639438.1	0	1453.71	0	0.25	0.250362	0	160	40	6.32414e+06	1.58017e+06		High	High	High	0.0002019	0.001098	2.03	20.49	Used
	TRUE	High	TLREQGVEEHETLLLRR		FALSE	0.0293191	0.000865703	1	2	7	XP_003639438.1	2	2079.13	0	0.723	0.913511	0	116.1	83.9	6.95319e+06	5.02884e+06		High	High	High	0.005112	0.06786	2.5	30.89	Used
	TRUE	High	LHTDDELNWLDHGR		FALSE	0.0297083	0.000865703	1	2	3	XP_003639438.1	0	1720.8	0	1.096	0.977963	0	95.4	104.6	3.37768e+06	3.70147e+06		High	High	High	0.0002602	0.002045	2.4	42.73	Used
	TRUE	High	FGQDFSTFLEAGVEMAGQAPSQEDRAQVVSNLK	1xDeamidated [Q]	FALSE	0.0281809	0.000865703	1	2	2	XP_003639438.1	1	3557.69	0								No Quan Values	High	Not Found	High	0.0002602	0.001871	3.13		Not Used
	TRUE	High	AIAVTVQEMVTK	1xDeamidated [Q7]; 1xOxidation [M9]	FALSE	0.0373963	0.00101489	1	2	1	XP_003639438.1	0	1306.69	0								No Quan Values	High	Not Found	High	0.000303	0.002953	2.29		Not Used
	TRUE	High	MVAAATNNLCEAANAAVQGHASQEK	1xCarbamidomethyl [C10]	FALSE	0.0394085	0.00101489	1	2	1	XP_003639438.1	0	2556.19	0	0.856	0.971875	0	107.8	92.2	2.33466e+06	1.99737e+06		High	Peak Found	High	0.000303	0.003255	2.75	41.73	Used
	TRUE	High	GVAALTSDPAVQAIVLDTASDVLDKASSLIEEAKK		FALSE	0.0514834	0.00101489	1	2	2	XP_003639438.1	2	3525.89	0	0.521	0.781435	0	131.5	68.5	17145988	8938193		High	High	High	0.000303	0.005241	2.52	134.14	Used
	TRUE	High	GVAALTSDPAVQAIVLDTASDVLDKASSLIEEAKK	1xDeamidated [Q12]	FALSE	0.0359531	0.00101489	1	2	1	XP_003639438.1	2	3526.87	0	0.01	9.75497e-17		200		3051904			High	Not Found	High	0.000303	0.002774	2.99	133.63	Used
	TRUE	High	AVTDSINQLITMCTQQAPGQKECDNALRELETVR	2xCarbamidomethyl [C13; C23]; 2xDeamidated [Q15; Q16]; 1xOxidation [M12]	FALSE	0.0479318	0.00101489	1	2	1	XP_003639438.1	2	3907.85	0								No Quan Values	High	Not Found	High	0.000303	0.004611	3.05		Not Used
	TRUE	High	TLSHPQQMALLDQTR	1xDeamidated [Q6]	FALSE	0.0521558	0.00101489	1	2	1	XP_003639438.1	0	1739.87	0								Not Reliable	High	Not Found	High	0.000303	0.005325	1.95		Not Used
	TRUE	High	LKPLPGETMEK		FALSE	0.0574749	0.00139497	1	2	1	XP_003639438.1	0	1242.68	0	0.266	0.362589	0	158	42	73613.7	19577.1		High	Peak Found	High	0.0004148	0.006415	2.21	18.96	Used
	TRUE	High	HRVQELGHGCAALVTK	1xCarbamidomethyl [C10]; 1xDeamidated [Q4]	FALSE	0.0597449	0.00139497	1	2	1	XP_003639438.1	1	1776.92	0	0.551	0.811619	0	128.9	71.1	144769	79791.3		High	Peak Found	High	0.0004148	0.006911	2.34	18.08	Used
	TRUE	High	ACEFAGFQCQIQFGPHNEQK	2xCarbamidomethyl [C2; C9]	FALSE	0.0582223	0.00139497	1	2	1	XP_003639438.1	0	2396.05	0								No Quan Values	Not Found	High	High	0.0004148	0.006541	1.8		Not Used
	TRUE	High	ELLENPVQPINDMSYFGCLDSVMENSK	1xCarbamidomethyl [C18]; 1xDeamidated [N/Q]; 2xOxidation [M13; M23]	FALSE	0.06496	0.00177815	1	2	3	XP_003639438.1	0	3162.4	0								No Quan Values	High	High	High	0.000528	0.008093	2.27		Not Used
	TRUE	High	LGAASLGAEDPETQVVLINAVKDVAK	1xDeamidated [N19]	FALSE	0.087084	0.00364368	1	2	1	XP_003639438.1	1	2609.4	0								Not Reliable	High	Not Found	High	0.001292	0.01381	2.18		Not Used
	TRUE	High	ECDNALRELETVR	1xCarbamidomethyl [C2]	FALSE	0.0904418	0.00400093	1	2	1	XP_003639438.1	1	1604.77	0	0.699	0.902642	0	117.7	82.3	1.83191e+06	1.28104e+06		High	Peak Found	High	0.001341	0.01484	2.3	41.42	Used
	TRUE	High	ALDGAFTEENRAQCR	1xCarbamidomethyl [C14]	FALSE	0.143747	0.0068648	1	2	1	XP_003639438.1	1	1737.8	0	0.246	0.266859	0	160.6	39.4	438551	107700		High	Peak Found	High	0.002471	0.03276	1.9	22.2	Used
	TRUE	High	ELLENPVQPINDMSYFGCLDSVMENSK	1xCarbamidomethyl [C18]; 2xOxidation [M13; M23]	FALSE	0.149946	0.00734612	1	2	1	XP_003639438.1	0	3161.41	0								No Quan Values	High	Not Found	High	0.002664	0.03533	2.57		Not Used
	TRUE	High	MVGGIAQIIAAQEEMLRK	2xOxidation [M1; M15]	FALSE	0.159214	0.00784511	1	2	1	XP_003639438.1	1	1990.05	0								No Quan Values	High	Not Found	High	0.002806	0.03889	1.95		Not Used
TRUE	High	Master Protein	XP_867483.1	filamin-A [Canis lupus familiaris]	0	FALSE	1095.96	65	123	754	120	1	2646	280.5	6.11	1644.7	123	3	0.435	0.407474	6.38	137.6	62.4	1.3932e+09	6.31253e+08	High	High
	Checked	Confidence	Sequence	Modifications	Contaminant	Qvality PEP	Qvality q-value	# Protein Groups	# Proteins	# PSMs	Master Protein Accessions	# Missed Cleavages	Theo. MH+ [Da]	# Razor Quan Results	Abundance Ratio: (F4, Sample) / (F3, Control)	Abundance Ratio Adj. P-Value: (F4, Sample) / (F3, Control)	Abundance Ratio Variability [%]: (F4, Sample) / (F3, Control)	Abundances (Grouped): F3, Control	Abundances (Grouped): F4, Sample	Abundance: F3: Control	Abundance: F4: Sample	Quan Info	Found in Sample: [S3] F3: Control	Found in Sample: [S4] F4: Sample	Confidence (by Search Engine): Sequest HT	Percolator q-Value (by Search Engine): Sequest HT	Percolator PEP (by Search Engine): Sequest HT	XCorr (by Search Engine): Sequest HT	Top Apex RT [min]	Quan Usage
	TRUE	High	LIALLEVLSQK		FALSE	0.000207331	0	2	12	5	XP_867483.1; XP_539385.1	0	1226.77	0	0.499	0.756207	0	133.4	66.6	5.91256e+06	2952840	Shared	High	High	High	0.0002019	0.0009055	2.97	91.06	Used
	TRUE	High	VGSAADIPINISETDLSLLTATVVPPSGR		FALSE	0.00171627	0	1	1	4	XP_867483.1	0	2893.55	0	0.323	0.429531	0	151.2	48.8	7.45833e+06	2.40753e+06		High	Peak Found	High	0	0.000142	3.17	105.58	Used
	TRUE	High	LPQLPITNFSR		FALSE	0.000371752	0	1	1	4	XP_867483.1	0	1285.73	0	0.417	0.642216	0	141.1	58.9	16291062	6800058		High	High	High	0	4.123e-05	1.94	59.76	Used
	TRUE	High	IPEISIQDMTAQVTSPSGK	1xOxidation [M9]	FALSE	2.1024e-06	0	1	1	5	XP_867483.1	0	2018.01	0	0.53	0.79113	0	130.7	69.3	3.14993e+06	1.66856e+06		High	High	High	0	4.822e-07	3.69	42.79	Used
	TRUE	High	IPEISIQDMTAQVTSPSGK	1xDeamidated [Q]; 1xOxidation [M9]	FALSE	4.4888e-06	0	1	1	3	XP_867483.1	0	2019	0								Not Reliable	High	High	High	0	9.271e-07	4.31		Not Used
	TRUE	High	LRNGHVGISFVPK		FALSE	0.00131246	0	1	1	2	XP_867483.1	1	1423.82	0	0.458	0.701353	0	137.1	62.9	1.73871e+06	796901		High	High	High	0	0.0001156	3.2	28.58	Used
	TRUE	High	LQVEPAVDTSGVQCYGPGIEGQGVFR	1xCarbamidomethyl [C14]	FALSE	1.18061e-07	0	1	1	6	XP_867483.1	0	2763.34	0	0.516	0.776565	0	131.9	68.1	6598636	3.40581e+06		High	High	High	0	3.994e-08	4.95	62.95	Used
	TRUE	High	LQVEPAVDTSGVQCYGPGIEGQGVFR	1xCarbamidomethyl [C14]; 1xDeamidated [Q]	FALSE	3.10378e-07	0	1	1	9	XP_867483.1	0	2764.32	0								Not Reliable	High	High	High	0	9.234e-08	6.16		Not Used
	TRUE	High	VDINTEDLEDGTCR	1xCarbamidomethyl [C13]	FALSE	2.08787e-05	0	1	1	4	XP_867483.1	0	1636.71	0	0.806	0.953518	0	110.7	89.3	2.53852e+06	2.04673e+06		High	High	High	0	3.485e-06	2.74	31.28	Used
	TRUE	High	VANPSGNLTETYVQDCGDGTYK	1xCarbamidomethyl [C16]	FALSE	1.25358e-05	0	1	1	1	XP_867483.1	0	2389.06	0								No Quan Values	High	Not Found	High	0	2.246e-06	3.73		Not Used
	TRUE	High	VAQPAITDNKDGTVTVR		FALSE	4.4888e-06	0	1	1	18	XP_867483.1	1	1784.95	0	0.268	0.293298	0	157.7	42.3	6.12618e+07	1.6413e+07		High	High	High	0	0.0001432	2.87	22.64	Used
	TRUE	High	VGSAADIPINISETDLSLLTATVVPPSGR	1xDeamidated [N10]	FALSE	0.000848625	0	1	1	4	XP_867483.1	0	2894.54	0								Not Reliable	High	High	High	0.0004148	0.006662	3		Not Used
	TRUE	High	HTAMVSWGGVSIPNSPFR	1xOxidation [M4]	FALSE	2.00545e-05	0	1	1	3	XP_867483.1	0	1958.95	0	0.346	0.482114	0	148.6	51.4	2.89753e+06	1.00231e+06		High	High	High	0	3.375e-06	2.94	62.83	Used
	TRUE	High	VHSPSGALEECYVTEIDQDKYAVR	1xCarbamidomethyl [C11]; 1xDeamidated [Q18]	FALSE	0.000203198	0	1	1	4	XP_867483.1	1	2767.29	0								Not Reliable	High	High	High	0	8.478e-05	4.53		Not Used
	TRUE	High	VHSPSGALEECYVTEIDQDKYAVR	1xCarbamidomethyl [C11]	FALSE	8.9018e-06	0	1	1	3	XP_867483.1	1	2766.3	0	0.435	0.668568	0	139.4	60.6	9.5393e+06	4.14507e+06		High	High	High	0	5.025e-05	2.98	51.56	Used
	TRUE	High	VHGPGIQSGTTNKPNKFTVETR	1xDeamidated [N/Q]	FALSE	0.000255285	0	1	1	6	XP_867483.1	1	2369.22	0	0.389	0.580717	0	144	56	2.12368e+06	825933		High	High	High	0.0001485	0.0005325	3.23	20.84	Used
	TRUE	High	VHGPGIQSGTTNKPNKFTVETR		FALSE	5.34346e-05	0	1	1	3	XP_867483.1	1	2368.24	0	0.324	0.431975	0	151.1	48.9	17263094	5.59324e+06		High	High	High	0	7.818e-06	2.13	19.25	Used
	TRUE	High	IANLQTDLSDGLR		FALSE	1.9006e-05	0	1	1	7	XP_867483.1	0	1415.75	0	0.475	0.726658	0	135.6	64.4	1.85205e+07	8.79685e+06		High	High	High	0	3.208e-06	3.5	44.94	Used
	TRUE	High	KTHIQDNHDGTYTVAYVPDVTGR		FALSE	9.77649e-05	0	1	1	9	XP_867483.1	1	2587.25	0	0.636	0.877459	0	122.2	77.8	3.23791e+07	2.06054e+07		High	High	High	0.0002019	0.0009177	3.07	34.11	Used
	TRUE	High	KNGQHVASSPIPVVISQSEIGDASR	1xDeamidated [Q/N]	FALSE	0.00108045	0	1	1	2	XP_867483.1	1	2577.33	0								No Quan Values	High	Not Found	High	0	0.0001024	3.42		Not Used
	TRUE	High	RLTVSSLQESGLK		FALSE	0.00130368	0	1	1	6	XP_867483.1	1	1417.8	0	0.392	0.587134	0	143.7	56.3	1.39752e+07	5.47969e+06		High	High	High	0	0.0001151	2.7	31.06	Used
	TRUE	High	TGVAVNKPAEFTVDAK		FALSE	0.000172966	0	1	1	11	XP_867483.1	0	1646.87	0	0.473	0.725877	0	135.8	64.2	9.81071e+07	4.63838e+07		High	High	High	0.0001092	0.000173	3.16	28.95	Used
	TRUE	High	RAPSVANVGSHCNLSLK	1xCarbamidomethyl [C12]	FALSE	0.000284225	0	1	1	3	XP_867483.1	1	1809.94	0	0.429	0.659911	0	140	60	3.86868e+06	1658847		High	High	High	0	3.283e-05	3.96	24.82	Used
	TRUE	High	SADFVVEAIGDDVGTLGFSVEGPSQAK		FALSE	3.10447e-08	0	1	1	18	XP_867483.1	0	2695.31	0	0.505	0.758536	0	132.9	67.1	6409945	3.23943e+06		High	High	High	0	1.263e-08	4.64	94.6	Used
	TRUE	High	SADFVVEAIGDDVGTLGFSVEGPSQAK	1xDeamidated [Q25]	FALSE	6.5825e-07	0	1	1	17	XP_867483.1	0	2696.29	0								No Quan Values	High	High	High	0	2.543e-07	4.6		Not Used
	TRUE	High	SAGQGEVLVYVEDPAGHQEEAK		FALSE	0.000139534	0	1	1	6	XP_867483.1	0	2313.1	0	0.622	0.87102	0	123.3	76.7	13497089	8396078		High	High	High	0	1.783e-05	3.54	41.39	Used
	TRUE	High	SAGQGEVLVYVEDPAGHQEEAK	1xDeamidated [Q]	FALSE	0.000782978	0	1	1	4	XP_867483.1	0	2314.08	0								Not Reliable	High	High	High	0	7.658e-05	2.48		Not Used
	TRUE	High	SEAGLPAEVHIQDHGDGTHTITYIPLCPGAYTVTIK	1xCarbamidomethyl [C27]	FALSE	0.000865879	0	1	1	6	XP_867483.1	0	3861.91	0	0.342	0.472374	0	149	51	8.9166e+06	3048386		High	High	High	0.0001485	0.0003001	3.52	72.08	Used
	TRUE	High	TGVELGKPTHFTINAK		FALSE	0.000400234	0	1	1	6	XP_867483.1	0	1712.93	0	0.582	0.839139	0	126.4	73.6	5.24863e+07	3.05481e+07		High	High	High	0	4.376e-05	3.35	32.33	Used
	TRUE	High	THEAEIVEGENHTYCIR	1xCarbamidomethyl [C15]; 1xDeamidated [N11]	FALSE	3.84749e-07	0	1	1	7	XP_867483.1	0	2058.92	0								No Quan Values	High	High	High	0	1.107e-07	4.48		Not Used
	TRUE	High	THEAEIVEGENHTYCIR	1xCarbamidomethyl [C15]	FALSE	1.92714e-07	0	1	1	13	XP_867483.1	0	2057.93	0	0.482	0.737591	0	135	65	2.35407e+07	1.13359e+07		High	High	High	0	6.104e-08	5.43	27.55	Used
	TRUE	High	SEAGLPAEVHIQDHGDGTHTITYIPLCPGAYTVTIK	1xCarbamidomethyl [C27]; 1xDeamidated [Q12]	FALSE	0.0011173	0	1	1	4	XP_867483.1	0	3862.9	0								No Quan Values	High	High	High	0.0002602	0.001898	3.82		Not Used
	TRUE	High	SPFEVYVDKSQGDASK		FALSE	8.32388e-06	0	1	1	4	XP_867483.1	1	1756.84	0	0.502	0.757224	0	133.2	66.8	21880130	1.09807e+07		High	High	High	0	1.58e-06	4.39	32.41	Used
	TRUE	High	SPFSVGVSPSLDLSK		FALSE	0.00042231	0	1	1	6	XP_867483.1	0	1519.8	0	0.411	0.634027	0	141.8	58.2	12770745	5.24762e+06		High	High	High	0	4.595e-05	3.49	55.84	Used
	TRUE	High	SPYTVTVGQACNPGACR	2xCarbamidomethyl [C11; C16]	FALSE	5.23932e-07	0	1	1	6	XP_867483.1	0	1837.83	0	0.451	0.690902	0	137.8	62.2	19961431	9.01151e+06		High	High	High	0	9.936e-06	4.61	27.98	Used
	TRUE	High	SPYTVTVGQACNPGACR	2xCarbamidomethyl [C11; C16]; 1xDeamidated [Q/N]	FALSE	8.2682e-06	0	1	1	4	XP_867483.1	0	1838.82	0	0.503	0.772723	0	133	67	621353	312799		High	High	High	0	8.555e-06	3.21	29.58	Used
	TRUE	High	TTYFEIFTAGAGTGEVEVVIQDPTGQK		FALSE	0.000737095	0	1	1	1	XP_867483.1	0	2858.41	0								No Quan Values	High	Not Found	High	0	7.282e-05	3.79		Not Used
	TRUE	High	LVSNHSLHETSSVFVDSLTK		FALSE	9.39289e-06	0	1	1	5	XP_867483.1	0	2200.12	0	0.321	0.424853	0	151.4	48.6	9.82859e+06	3.15283e+06		High	High	High	0	1.749e-06	3.61	43.59	Used
	TRUE	High	LVSNHSLHETSSVFVDSLTK	1xDeamidated [N4]	FALSE	2.51958e-05	0	1	1	2	XP_867483.1	0	2201.11	0	0.01	9.75497e-17		200		772761			High	Not Found	High	0.0002019	0.001038	2.93	47.74	Used
	TRUE	High	ITGPSGTAVPCKVEPGLGADNSVVR	1xCarbamidomethyl [C11]	FALSE	0.000258735	0	1	1	5	XP_867483.1	1	2481.28	0	0.542	0.807415	0	129.7	70.3	14054230	7.62212e+06		High	High	High	0.001292	0.01396	3.37	38.08	Used
	TRUE	High	NGHVGISFVPK		FALSE	0.000312227	0	1	1	4	XP_867483.1	0	1154.63	0	0.247	0.244199	0	160.4	39.6	7.4313e+06	1.83568e+06		High	High	High	0	9.012e-05	3.62	29.6	Used
	TRUE	High	NGQHVASSPIPVVISQSEIGDASR		FALSE	7.94182e-06	0	1	1	3	XP_867483.1	0	2448.25	0	0.4	0.609187	0	142.8	57.2	1.27846e+06	511706		High	High	High	0	2.146e-05	4.41	51.53	Used
	TRUE	High	NGQHVASSPIPVVISQSEIGDASR	1xDeamidated [N/Q]	FALSE	0.000463912	0	1	1	5	XP_867483.1	0	2449.23	0								No Quan Values	High	High	High	0	4.969e-05	3.95		Not Used
	TRUE	High	YTPVQQGPVGINVTYGGDPIPK		FALSE	4.28276e-06	0	1	1	7	XP_867483.1	0	2300.19	0	0.412	0.634348	0	141.6	58.4	19226677	7.92343e+06		High	High	High	0	8.869e-07	4.35	56.3	Used
	TRUE	High	AHEPTYFTVDCTEAGQGDVSIGIK	1xCarbamidomethyl [C11]	FALSE	1.22859e-05	0	1	1	2	XP_867483.1	0	2595.2	0								No Quan Values	High	High	High	0	2.211e-06	4.17		Not Used
	TRUE	High	YTPVQQGPVGINVTYGGDPIPK	2xDeamidated [Q5; N12]	FALSE	0.00155203	0	1	1	1	XP_867483.1	0	2302.16	0								Not Reliable	High	Not Found	High	0	0.0001318	3.03		Not Used
	TRUE	High	VTAQGPGLEPSGNIANK		FALSE	2.4699e-06	0	1	1	7	XP_867483.1	0	1652.86	0	0.205	0.149078	0	165.9	34.1	4.79974e+07	9.85401e+06		High	High	High	0	5.523e-07	4.1	22.71	Used
	TRUE	High	VTAQGPGLEPSGNIANK	1xDeamidated [Q/N]	FALSE	0.000329449	0	1	1	3	XP_867483.1	0	1653.84	0	0.219	0.175033	0	164.1	35.9	4.42951e+06	968469		High	High	High	0	3.711e-05	3.31	23.8	Used
	TRUE	High	YTPVQQGPVGINVTYGGDPIPK	1xDeamidated [Q/N]	FALSE	1.38637e-05	0	1	1	15	XP_867483.1	0	2301.18	0								No Quan Values	High	High	High	0	1.201e-05	4.27		Not Used
	TRUE	High	VTVLFAGQHIAK		FALSE	0.000203198	0	1	1	5	XP_867483.1	0	1283.75	0	0.492	0.746953	0	134.1	65.9	46891138	23053001		High	High	High	0	0.0001061	2.5	34.85	Used
	TRUE	High	DNGNGTYSCSYVPR	1xCarbamidomethyl [C9]; 1xDeamidated [N]	FALSE	5.98935e-05	0	1	1	5	XP_867483.1	0	1590.65	0	0.23	0.201471	0	162.6	37.4	1.2308e+06	282960		High	High	High	0	5.323e-05	3.09	22.91	Used
	TRUE	High	DNGNGTYSCSYVPR	1xCarbamidomethyl [C9]; 2xDeamidated [N2; N4]	FALSE	0.000519975	0	1	1	2	XP_867483.1	0	1591.63	0								Not Reliable	High	High	High	0	5.44e-05	3.35		Not Used
	TRUE	High	VTYTPMAPGSYLISIK	1xOxidation [M6]	FALSE	0.000405643	0	1	1	5	XP_867483.1	0	1756.92	0	0.485	0.737591	0	134.7	65.3	5579942	2.7061e+06		High	High	High	0	4.429e-05	2.81	61.14	Used
	TRUE	High	ASGPGLNTTGVPASLPVEFTIDAK		FALSE	2.71265e-05	0	1	1	7	XP_867483.1	0	2342.22	0	0.413	0.634995	0	141.5	58.5	15527720	6.41697e+06		High	High	High	0	4.362e-06	3.87	76.45	Used
	TRUE	High	VSGLGEKVDVGKDQEFTVK		FALSE	0.000648867	0	1	1	3	XP_867483.1	2	2035.07	0	0.56	0.822759	0	128.2	71.8	1.26918e+07	7.10742e+06		High	High	High	0.001074	0.01295	2.58	33.37	Used
	TRUE	High	VRVHGPGIQSGTTNKPNK		FALSE	0.000253578	0	1	1	3	XP_867483.1	1	1890.03	0	0.276	0.361605	0	156.8	43.2	639809	176271		High	High	High	0	2.985e-05	4.17	12.31	Used
	TRUE	High	YWPQEAGEYAVHVLCNSEDIR	1xCarbamidomethyl [C15]; 1xDeamidated [Q/N]	FALSE	0.000114854	0	1	1	2	XP_867483.1	0	2537.14	0								Not Reliable	High	Not Found	High	0	0.0001291	2.62		Not Used
	TRUE	High	FNEEHIPDSPFVVPVASPSGDAR		FALSE	0.000919772	0	1	1	4	XP_867483.1	0	2467.19	0	0.275	0.311132	0	156.9	43.1	6.72923e+06	1.84783e+06		High	Peak Found	High	0	8.698e-05	2.84	62.56	Used
	TRUE	High	VRVHGPGIQSGTTNKPNKFTVETR		FALSE	0.000479743	0	1	1	8	XP_867483.1	2	2623.41	0	0.427	0.656041	0	140.2	59.8	1.54505e+07	6.59197e+06		High	High	High	0	6.469e-05	4.05	20.07	Used
	TRUE	High	VRVHGPGIQSGTTNKPNKFTVETR	1xDeamidated [N/Q]	FALSE	4.52003e-07	0	1	1	8	XP_867483.1	2	2624.39	0	0.541	0.805101	0	129.8	70.2	1.91697e+06	1.037e+06		High	High	High	0	1.276e-07	4.42	21.62	Used
	TRUE	High	APSVANVGSHCNLSLK	1xCarbamidomethyl [C11]	FALSE	3.04124e-06	0	1	1	3	XP_867483.1	0	1653.84	0	0.415	0.638668	0	141.3	58.7	4.45102e+06	1.8483e+06		High	High	High	0	6.616e-07	3.92	28.65	Used
	TRUE	High	AHEPTYFTVDCTEAGQGDVSIGIK	1xCarbamidomethyl [C11]; 1xDeamidated [Q16]	FALSE	5.94929e-05	0	1	1	2	XP_867483.1	0	2596.19	0								Not Reliable	High	Not Found	High	0	8.589e-06	4.11		Not Used
	TRUE	High	YGGPYHIGGSPFK		FALSE	0.00153136	0	1	1	10	XP_867483.1	0	1379.67	0	0.607	0.857693	0	124.5	75.5	2.88091e+07	1.74844e+07		High	High	High	0.0002602	0.002244	2.8	35	Used
	TRUE	High	VSGQGLHEGHTFEPAEFIIDTR		FALSE	0.000467036	0	1	1	2	XP_867483.1	0	2440.19	0	0.453	0.694426	0	137.6	62.4	5.10026e+06	2.31027e+06		High	Peak Found	High	0	4.999e-05	3.1	58.31	Used
	TRUE	High	VSGQGLHEGHTFEPAEFIIDTR	1xDeamidated [Q4]	FALSE	0.000374255	0	1	1	2	XP_867483.1	0	2441.17	0								Not Reliable	High	High	High	0	4.13e-05	2.43		Not Used
	TRUE	High	DVDIIDHHDNTYTVK		FALSE	1.61781e-05	0	1	1	8	XP_867483.1	0	1784.84	0	0.432	0.665292	0	139.6	60.4	69704736	3.01325e+07		High	High	High	0	2.791e-06	3.38	28.36	Used
	TRUE	High	EGPYSISVLYGEEEVPR		FALSE	4.64201e-06	0	1	1	7	XP_867483.1	0	1923.93	0	0.448	0.686214	0	138.1	61.9	1.15415e+07	5.17034e+06		High	High	High	0	4.219e-05	3.13	62.44	Used
	TRUE	High	AFGPGLQGGSAGSPAR		FALSE	2.13034e-05	0	1	1	3	XP_867483.1	0	1429.72	0	0.127	0.0284314	0	177.5	22.5	13991408	1.77653e+06		High	Peak Found	High	0	3.557e-06	3.36	23.95	Used
	TRUE	High	EAGAGGLAIAVEGPSKAEISFEDRK		FALSE	0.00129497	0	1	1	2	XP_867483.1	2	2502.28	0	0.446	0.684321	0	138.4	61.6	2.75342e+06	1.2268e+06		High	Peak Found	High	0.0002019	0.0009334	3.58	51.92	Used
	TRUE	High	EAGAGGLAIAVEGPSK		FALSE	7.37654e-06	0	1	1	6	XP_867483.1	0	1426.75	0	0.501	0.757224	0	133.2	66.8	1.64085e+07	8221957		High	High	High	0	1.424e-06	3.96	34.62	Used
	TRUE	High	YGGDEIPFSPYR		FALSE	3.5244e-05	0	1	1	3	XP_867483.1	0	1400.65	0	0.197	0.133393	0	167	33	17630081	3.47928e+06		High	High	High	0	5.476e-06	3.28	46.64	Used
	TRUE	High	WGDEHIPGSPYR		FALSE	0.00100359	0	1	1	9	XP_867483.1	0	1413.65	0	0.375	0.555377	0	145.4	54.6	1.26919e+07	4.76104e+06		High	High	High	0.0002019	0.001732	2.77	31.52	Used
	TRUE	High	AWGPGLEGGVVGK		FALSE	0.00136635	0	1	1	4	XP_867483.1	0	1226.65	0	0.643	0.879416	0	121.8	78.2	21418838	13764567		High	High	High	0	0.0001275	3.4	37.97	Used
	TRUE	High	AGNNMLLVGVHGPR	1xOxidation [M5]	FALSE	8.84009e-05	0	1	1	13	XP_867483.1	0	1450.76	0	1.318	0.930356	0	86.3	113.7	1.91844e+07	2.52941e+07		High	High	High	0	1.207e-05	3.36	28.35	Used
	TRUE	High	EATTEFSVDAR		FALSE	0.000205944	0	1	1	4	XP_867483.1	0	1225.57	0	0.285	0.340851	0	155.6	44.4	4.01793e+06	1.14691e+06		High	High	High	0	3.829e-05	3.11	22.64	Used
	TRUE	High	YGGQPVPNFPSK	1xDeamidated [N/Q]	FALSE	0.000944789	0	1	1	5	XP_867483.1	0	1291.63	0	0.17	0.0824566	0	170.9	29.1	3959692	673449		High	High	High	0	8.922e-05	2.53	31.81	Used
	TRUE	High	AFGPGLQGGSAGSPAR	1xDeamidated [Q7]	FALSE	0.000460809	0	1	1	2	XP_867483.1	0	1430.7	0	0.134	0.0353399	0	176.3	23.7	1.49829e+06	201504		High	High	High	0	4.925e-05	3.01	25.56	Used
	TRUE	High	EAMQQADDWLGIPQVITPEEIVDPNVDEHSVMTYLSQFPK	2xDeamidated [Q/N]; 2xOxidation [M3; M32]	FALSE	7.99337e-05	0	1	1	4	XP_867483.1	0	4604.14	0								No Quan Values	High	Not Found	High	0	1.107e-05	5.32		Not Used
	TRUE	High	EAMQQADDWLGIPQVITPEEIVDPNVDEHSVMTYLSQFPK	1xDeamidated [N/Q]; 2xOxidation [M3; M32]	FALSE	0.000165027	0	1	1	10	XP_867483.1	0	4603.15	0	0.292	0.358223	0	154.8	45.2	4.33601e+06	1.26607e+06		High	High	High	0.0001092	0.0001587	4.86	110.29	Used
	TRUE	High	EAMQQADDWLGIPQVITPEEIVDPNVDEHSVMTYLSQFPK	2xDeamidated [Q/N]; 1xOxidation [M3]	FALSE	0.00160496	0	1	1	4	XP_867483.1	0	4588.14	0								No Quan Values	High	Not Found	High	0	0.0001351	3.38		Not Used
	TRUE	High	EAMQQADDWLGIPQVITPEEIVDPNVDEHSVMTYLSQFPK	1xDeamidated [Q37]; 1xOxidation [M3]	FALSE	3.92398e-05	0	1	1	1	XP_867483.1	0	4587.16	0								No Quan Values	High	Not Found	High	0	6.001e-06	4.75		Not Used
	TRUE	High	YGGQPVPNFPSK		FALSE	0.000250197	0	1	1	5	XP_867483.1	0	1290.65	0	0.318	0.41728	0	151.8	48.2	53896876	17117536		High	High	High	0	4.635e-05	3.23	29.62	Used
	TRUE	High	ATAGEAGQFHVDCSSAGSAELTIEIR	1xCarbamidomethyl [C13]	FALSE	2.40393e-05	0	1	1	1	XP_867483.1	0	2677.25	0								No Quan Values	High	Not Found	High	0	3.93e-06	3.69		Not Used
	TRUE	High	ATAGEAGQFHVDCSSAGSAELTIEIR	1xCarbamidomethyl [C13]; 1xDeamidated [Q8]	FALSE	1.56441e-05	0	1	1	1	XP_867483.1	0	2678.24	0								No Quan Values	High	Not Found	High	0	2.725e-06	2.79		Not Used
	TRUE	High	AEAGVPAEFSIWTR		FALSE	0.00142245	0	1	1	1	XP_867483.1	0	1533.77	0								No Quan Values	High	Not Found	High	0	0.0001228	2.21		Not Used
	TRUE	High	DAGYGGLSLSIEGPSK		FALSE	0.00110241	0	1	1	2	XP_867483.1	0	1550.77	0								No Quan Values	High	Not Found	High	0	0.0001144	3.4		Not Used
	TRUE	High	ALGALVDSCAPGLCPDWDSWDASKPVNNAR	2xCarbamidomethyl [C9; C14]; 1xDeamidated [N]	FALSE	0.000128736	0	1	1	4	XP_867483.1	0	3243.48	0								No Quan Values	High	High	High	0	1.866e-05	3.84		Not Used
	TRUE	High	ALGALVDSCAPGLCPDWDSWDASKPVNNAR	2xCarbamidomethyl [C9; C14]	FALSE	0.000199148	0	1	1	2	XP_867483.1	0	3242.5	0	0.424	0.654974	0	140.5	59.5	3011134	1.27556e+06		High	High	High	0.001527	0.01943	3.13	73.97	Used
	TRUE	High	VNQPASFAVSLNGAK	1xDeamidated [N12]	FALSE	6.02969e-05	0	1	1	6	XP_867483.1	0	1503.78	0	0.415	0.638344	0	141.3	58.7	7.5101e+06	3.11664e+06		High	High	High	0	7.54e-05	3.02	38.57	Used
	TRUE	High	GDAVRDVDIIDHHDNTYTVK		FALSE	0.000457727	0	1	1	3	XP_867483.1	1	2283.1	0	0.717	0.910794	0	116.5	83.5	1.13349e+07	8124185		High	Peak Found	High	0.0007517	0.009967	2.67	32.12	Used
	TRUE	High	DAGEGLLAVQITDPEGKPK	1xDeamidated [Q10]	FALSE	0.000877575	0	1	1	2	XP_867483.1	0	1939	0								Not Reliable	High	High	High	0	8.372e-05	3.83		Not Used
	TRUE	High	DGSCGVAYVVQEPGDYEVSVK	1xCarbamidomethyl [C4]	FALSE	0.000226234	0	1	1	3	XP_867483.1	0	2258.03	0								No Quan Values	High	High	High	0	2.7e-05	2.65		Not Used
	TRUE	High	GLVEPVDVVDNADGTQTVNYVPSR		FALSE	4.58112e-07	0	1	1	12	XP_867483.1	0	2544.26	0	0.483	0.737591	0	134.8	65.2	20617647	9.96326e+06		High	High	High	0	1.294e-07	5.27	56.47	Used
	TRUE	High	DAGYGGLSLSIEGPSKVDINTEDLEDGTCR	1xCarbamidomethyl [C29]; 1xDeamidated [N20]	FALSE	9.91107e-06	0	1	1	1	XP_867483.1	1	3169.45	0								No Quan Values	High	Not Found	High	0	1.835e-06	4.84		Not Used
	TRUE	High	GLVEPVDVVDNADGTQTVNYVPSR	2xDeamidated [N11; N19]	FALSE	0.000767375	0	1	1	1	XP_867483.1	0	2546.23	0								Not Reliable	High	Not Found	High	0	7.527e-05	3.09		Not Used
	TRUE	High	GLVEPVDVVDNADGTQTVNYVPSR	1xDeamidated [N/Q]	FALSE	4.4888e-06	0	1	1	11	XP_867483.1	0	2545.24	0								No Quan Values	High	High	High	0	3.647e-05	4.05		Not Used
	TRUE	High	VQVQDNEGCPVDATVK	1xCarbamidomethyl [C9]	FALSE	1.65072e-05	0	1	1	6	XP_867483.1	0	1758.83	0	0.173	0.0872139	0	170.5	29.5	6.51833e+06	1.1256e+06		High	High	High	0	6.065e-06	4.22	20.05	Used
	TRUE	High	YAPSEAGLHEMDIR	1xOxidation [M11]	FALSE	0.00110241	0	1	1	2	XP_867483.1	0	1604.74	0	0.305	0.398848	0	153.3	46.7	833150	254145		High	High	High	0.0001485	0.0003491	1.86	22.05	Used
	TRUE	High	DAGEGGLSLAIEGPSK		FALSE	1.75351e-05	0	1	1	6	XP_867483.1	0	1500.75	0	0.472	0.725831	0	135.9	64.1	3284257	1.54895e+06		High	High	High	0	3.004e-06	3.95	41.82	Used
	TRUE	High	DAEMPATEKDLAEDAPWKK	1xOxidation [M4]	FALSE	0.00070801	0	1	1	4	XP_867483.1	2	2161.01	0	0.968	0.991247	0	101.6	98.4	7.33945e+06	7.10596e+06		High	High	High	0.0001485	0.0004534	2.55	34.75	Used
	TRUE	High	VQVQDNEGCPVDATVKDNGNGTYSCSYVPR	2xCarbamidomethyl [C9; C25]; 2xDeamidated [N/Q]	FALSE	2.84315e-05	0	1	1	5	XP_867483.1	1	3331.45	0	1.808	0.815728	0	71.2	128.8	1.28256e+06	2.31918e+06		High	High	High	0	4.556e-06	4.69	35.77	Used
	TRUE	High	VQVQDNEGCPVDATVKDNGNGTYSCSYVPR	2xCarbamidomethyl [C9; C25]; 3xDeamidated [N18; N20; N/Q]	FALSE	0.000919772	0	1	1	2	XP_867483.1	1	3332.43	0								Not Reliable	High	Not Found	High	0	8.717e-05	4.23		Not Used
	TRUE	High	ANLPQSFQVDTSK		FALSE	0.000102468	0	1	1	3	XP_867483.1	0	1434.72	0	0.518	0.778249	0	131.8	68.2	41698696	21599892		High	High	High	0	1.376e-05	3.31	32.47	Used
	TRUE	High	VQVQDNEGCPVDATVK	1xCarbamidomethyl [C9]; 1xDeamidated [Q/N]	FALSE	0.000101102	0	1	1	6	XP_867483.1	0	1759.82	0	0.204	0.180252	0	166.1	33.9	568494	116154		High	High	High	0	1.353e-05	4.38	21.13	Used
	TRUE	High	VQVQDNEGCPVDATVKDNGNGTYSCSYVPR	2xCarbamidomethyl [C9; C25]; 1xDeamidated [N/Q]	FALSE	0.000183737	0	1	1	5	XP_867483.1	1	3330.46	0	0.306	0.390974	0	153.2	46.8	2.942e+06	899623		High	High	High	0	2.267e-05	5.16	36	Used
	TRUE	High	AYGPGIEPTGNMVK	1xOxidation [M12]	FALSE	0.000389633	0	1	1	4	XP_867483.1	0	1449.7	0	0.153	0.0586462	0	173.4	26.6	7909547	1.21278e+06		High	High	High	0	4.285e-05	3.21	22.42	Used
	TRUE	High	GAGTGGLGLAVEGPSEAK		FALSE	4.51798e-05	0	1	1	7	XP_867483.1	0	1570.81	0	0.534	0.795792	0	130.4	69.6	39744936	21206772		High	High	High	0	6.785e-06	3.81	33.25	Used
	TRUE	High	GAGSYTIMVLFADQATPTSPIR	1xDeamidated [Q14]; 1xOxidation [M8]	FALSE	1.41457e-05	0	1	1	6	XP_867483.1	0	2313.14	0								Not Reliable	High	High	High	0	2.488e-06	3.78		Not Used
	TRUE	High	GAGSYTIMVLFADQATPTSPIR	1xOxidation [M8]	FALSE	0.000146247	0	1	1	9	XP_867483.1	0	2312.16	0	0.43	0.661258	0	139.8	60.2	7.0337e+06	3.02709e+06		High	High	High	0	1.862e-05	4.43	78.28	Used
	TRUE	High	GAGSYTIMVLFADQATPTSPIR	1xDeamidated [Q14]	FALSE	0.00175115	0	1	1	1	XP_867483.1	0	2297.15	0								Not Reliable	High	Not Found	High	0	0.0001437	3.45		Not Used
	TRUE	High	DAGEGLLAVQITDPEGKPK		FALSE	1.1883e-06	0	1	1	4	XP_867483.1	0	1938.02	0	0.495	0.751528	0	133.7	66.3	1.18063e+07	5.8496e+06		High	High	High	0	2.935e-07	4.04	49.44	Used
	TRUE	High	LRNGHVGISFVPK	1xDeamidated [N3]	FALSE	0.00238374	0.000331607	1	1	5	XP_867483.1	1	1424.8	0	0.526	0.787106	0	131	69	8.04957e+06	4.23646e+06		High	High	High	0.0001485	0.0002792	3.03	33.25	Used
	TRUE	High	SPFEVYVDK		FALSE	0.00258339	0.000331607	1	1	2	XP_867483.1	0	1083.54	0	0.532	0.794743	0	130.6	69.4	4533787	2.41132e+06		High	High	High	0.0001092	0.0001905	2.8	35.6	Used
	TRUE	High	DNGNGTYSCSYVPR	1xCarbamidomethyl [C9]	FALSE	0.00205687	0.000331607	1	1	1	XP_867483.1	0	1589.66	0	0.01	9.75497e-17		200		286832			High	Not Found	High	0.0001092	0.0001623	1.65	22.13	Used
	TRUE	High	VSGLGEKVDVGKDQEFTVK	1xDeamidated [Q14]	FALSE	0.00187259	0.000331607	1	1	1	XP_867483.1	2	2036.05	0								Not Reliable	High	Not Found	High	0.0001092	0.0001515	2.73		Not Used
	TRUE	High	VAQPAITDNKDGTVTVR	1xDeamidated [Q3]	FALSE	0.00197578	0.000331607	1	1	3	XP_867483.1	1	1785.93	0	0.241	0.230508	0	161.1	38.9	3.90063e+06	941177		High	High	High	0.0001092	0.0001578	2.38	24.92	Used
	TRUE	High	TGVAVNKPAEFTVDAK	1xDeamidated [N6]	FALSE	0.00219949	0.000331607	1	1	3	XP_867483.1	0	1647.86	0	0.444	0.682912	0	138.5	61.5	1.24079e+06	550570		High	Peak Found	High	0.0001092	0.0001704	2.91	30.72	Used
	TRUE	High	DGSCGVAYVVQEPGDYEVSVK	1xCarbamidomethyl [C4]; 1xDeamidated [Q11]	FALSE	0.0018353	0.000331607	1	1	1	XP_867483.1	0	2259.01	0								Not Reliable	High	Not Found	High	0.0001092	0.0001494	2.9		Not Used
	TRUE	High	LTVSSLQESGLK		FALSE	0.00244851	0.000331607	1	1	2	XP_867483.1	0	1261.7	0	0.609	0.85773	0	124.3	75.7	4.77824e+06	2.90823e+06		High	High	High	0.0001485	0.000274	2.33	34.12	Used
	TRUE	High	KTHIQDNHDGTYTVAYVPDVTGR	1xDeamidated [Q/N]	FALSE	0.00241591	0.000331607	1	1	11	XP_867483.1	1	2588.24	0								No Quan Values	High	High	High	0.0001485	0.0004913	3.25		Not Used
	TRUE	High	KNGQHVASSPIPVVISQSEIGDASR	2xDeamidated [Q4; Q17]	FALSE	0.00268939	0.000331607	1	1	1	XP_867483.1	1	2578.31	0								No Quan Values	High	Not Found	High	0.0001092	0.0001955	3.75		Not Used
	TRUE	High	NGQHVASSPIPVVISQSEIGDASR	2xDeamidated [Q3; Q16]	FALSE	0.00246498	0.000331607	1	1	1	XP_867483.1	0	2450.22	0								Not Reliable	High	Not Found	High	0.0001092	0.0001841	3.38		Not Used
	TRUE	High	AYGPGIEPTGNMVK	1xDeamidated [N11]; 1xOxidation [M12]	FALSE	0.00283752	0.000480221	1	1	2	XP_867483.1	0	1450.69	0	0.19	0.142884	0	168.1	31.9	472965	89670.1		High	High	High	0.0001485	0.0002034	2.91	23.56	Used
	TRUE	High	DAGYGGLSLSIEGPSKVDINTEDLEDGTCR	1xCarbamidomethyl [C29]	FALSE	0.00577144	0.000480221	1	1	1	XP_867483.1	1	3168.46	0								No Quan Values	High	Not Found	High	0.0001485	0.0003331	2.8		Not Used
	TRUE	High	QMQLENVSVALEFLDRESIK	1xOxidation [M2]	FALSE	0.0122827	0.000480221	1	8	2	XP_867483.1	1	2365.21	0	0.294	0.361796	0	154.6	45.4	5215948	1.531e+06		High	Peak Found	High	0.000303	0.004943	2.62	90.55	Used
	TRUE	High	AHVVPCFDASK	1xCarbamidomethyl [C6]	FALSE	0.00998678	0.000480221	1	1	2	XP_867483.1	0	1230.59	0	0.15	0.0547831	0	173.9	26.1	1.142e+06	171578		High	High	High	0.0001485	0.0007423	2.28	21.68	Used
	TRUE	High	ANLPQSFQVDTSK	1xDeamidated [Q8]	FALSE	0.00363587	0.000480221	1	1	2	XP_867483.1	0	1435.71	0	0.522	0.782025	0	131.4	68.6	3050231	1.59181e+06		High	High	High	0.0001485	0.0002407	1.69	34.21	Used
	TRUE	High	YNEQHIPGSPFTAR		FALSE	0.00402019	0.000480221	1	1	11	XP_867483.1	0	1616.78	1	0.445	0.684321	0	138.5	61.5	68882567	3.06205e+07		High	High	High	0.0002019	0.0009467	2.83	31.75	Used
	TRUE	High	YNEQHIPGSPFTAR	1xDeamidated [N/Q]	FALSE	0.00478488	0.000480221	1	1	2	XP_867483.1	0	1617.77	0	0.601	0.852006	0	125	75	944269	567057		High	Peak Found	High	0.0001485	0.0002904	2.73	33.57	Used
	TRUE	High	TFSVWYVPEVTGTHK		FALSE	0.0129559	0.000480221	1	1	3	XP_867483.1	0	1750.88	0	0.288	0.34795	0	155.2	44.8	3779678	1.08963e+06		High	Peak Found	High	0.0004718	0.00725	2.64	63.13	Used
	TRUE	High	RLRNGHVGISFVPK	1xDeamidated [N4]	FALSE	0.0159288	0.000480221	1	1	1	XP_867483.1	2	1580.9	0	0.528	0.788526	0	130.9	69.1	268207	141642		High	Peak Found	High	0.0001485	0.0008692	2.82	30.08	Used
	TRUE	High	RLTVSSLQESGLKVNQPASFAVSLNGAK	1xDeamidated [N/Q]	FALSE	0.00421317	0.000480221	1	1	4	XP_867483.1	2	2902.56	0								No Quan Values	High	Not Found	High	0.0001485	0.0005231	3.18		Not Used
	TRUE	High	ASGPGLNTTGVPASLPVEFTIDAK	1xDeamidated [N7]	FALSE	0.00307513	0.000480221	1	1	4	XP_867483.1	0	2343.21	0								No Quan Values	High	High	High	0.0001485	0.0005784	2.79		Not Used
	TRUE	High	VQVQDNEGCPVDATVKDNGNGTYSCSYVPR	2xCarbamidomethyl [C9; C25]	FALSE	0.0044154	0.000480221	1	1	2	XP_867483.1	1	3329.48	0	0.632	0.876904	0	122.6	77.4	1.53524e+06	970026		High	High	High	0.0001485	0.0002746	3.09	35.37	Used
	TRUE	High	VRVHGPGIQSGTTNKPNK	1xDeamidated [Q9]	FALSE	0.00444507	0.000480221	1	1	1	XP_867483.1	1	1891.01	0								Not Reliable	High	Not Found	High	0.0001485	0.0002756	1.99		Not Used
	TRUE	High	SPFEVYVDKSQGDASK	1xDeamidated [Q11]	FALSE	0.00378499	0.000480221	1	1	1	XP_867483.1	1	1757.82	0								No Quan Values	High	Not Found	High	0.0001485	0.0002466	2.8		Not Used
	TRUE	High	FVPAEMGMHTVSVK	1xOxidation [M]	FALSE	0.00638092	0.000480221	1	1	2	XP_867483.1	0	1548.75	0	0.342	0.475726	0	149	51	843155	288364		High	Peak Found	High	0.0001485	0.0003585	3.21	28.87	Used
	TRUE	High	FVPAEMGMHTVSVK	2xOxidation [M6; M8]	FALSE	0.0065103	0.000480221	1	1	1	XP_867483.1	0	1564.75	0	0.23	0.234002	0	162.6	37.4	468315	107551		High	Peak Found	High	0.0001485	0.0003647	2.5	18.27	Used
	TRUE	High	VRVHGPGIQSGTTNKPNKFTVETR	2xDeamidated [N17; Q/N]	FALSE	0.00289515	0.000480221	1	1	3	XP_867483.1	2	2625.37	0								Not Reliable	High	High	High	0.0001485	0.0002062	3.82		Not Used
	TRUE	High	VGEPGHGGDPGLVSAYGAGLEGGVTGSPAEFIVNTSNAGAGALSVTIDGPSK	1xDeamidated [N]	FALSE	0.0050145	0.000480221	1	1	4	XP_867483.1	0	4795.33	0								No Quan Values	High	Not Found	High	0.0001485	0.0002999	4.31		Not Used
	TRUE	High	FADQHVPGSPFSVK		FALSE	0.00383604	0.000480221	1	1	2	XP_867483.1	0	1515.76	0	0.648	0.882137	0	121.4	78.6	1.43832e+07	9.31606e+06		High	Peak Found	High	0.0001485	0.0002494	2.99	35.18	Used
	TRUE	High	VGEPGHGGDPGLVSAYGAGLEGGVTGSPAEFIVNTSNAGAGALSVTIDGPSK	2xDeamidated [N34; N37]	FALSE	0.00305459	0.000480221	1	1	4	XP_867483.1	0	4796.32	0								No Quan Values	High	High	High	0.0001485	0.0002135	4		Not Used
	TRUE	High	YWPQEAGEYAVHVLCNSEDIR	1xCarbamidomethyl [C15]	FALSE	0.00465841	0.000480221	1	1	2	XP_867483.1	0	2536.16	0	0.01	9.75497e-17		200		731566			High	Not Found	High	0.0001485	0.0004015	2.85	80.94	Used
	TRUE	High	VGSAADIPINISETDLSLLTATVVPPSGREEPCLLKR	1xCarbamidomethyl [C33]	FALSE	0.0146075	0.000480221	1	1	4	XP_867483.1	2	3919.08	0	0.27	0.299893	0	157.5	42.5	5.3282e+06	1.43968e+06		High	High	High	0.0002019	0.0009184	2.86	100.85	Used
	TRUE	High	GKPDVQFSGLAK		FALSE	0.00407441	0.000480221	1	1	5	XP_867483.1	0	1246.68	0	0.198	0.134581	0	166.9	33.1	1.10627e+07	2.1919e+06		High	High	High	0.0001485	0.0004251	3.05	26.68	Used
	TRUE	High	GAGSYTIMVLFADQATPTSPIR		FALSE	0.01082	0.000480221	1	1	2	XP_867483.1	0	2296.16	0								Not Reliable	High	Not Found	High	0.0001485	0.0005681	3.22		Not Used
	TRUE	High	VNQPASFAVSLNGAK		FALSE	0.00475294	0.000480221	1	1	2	XP_867483.1	0	1502.8	0	0.5	0.756787	0	133.3	66.7	6195230	3.0979e+06		High	High	High	0.0001485	0.0002891	2.67	39.23	Used
	TRUE	High	IPEISIQDMTAQVTSPSGK		FALSE	0.00554424	0.000480221	1	1	1	XP_867483.1	0	2002.02	0								No Quan Values	High	Not Found	High	0.0001485	0.0003227	2.83		Not Used
	TRUE	High	LSPFMADIR	1xOxidation [M5]	FALSE	0.00573294	0.000480221	1	1	2	XP_867483.1	0	1065.54	0	0.652	0.885998	0	121	79	19522966	12737328		High	High	High	0.0001485	0.0003313	2.25	35.89	Used
	TRUE	High	YAPSEAGLHEMDIR		FALSE	0.0144141	0.000480221	1	1	2	XP_867483.1	0	1588.74	0								No Quan Values	High	High	High	0.0001485	0.000772	2.15		Not Used
	TRUE	High	VDVGKDQEFTVK		FALSE	0.00584923	0.000480221	1	1	2	XP_867483.1	1	1364.71	0	0.161	0.0687307	0	172.3	27.7	1.74151e+06	279916		High	High	High	0.0001485	0.0003359	2.43	22.11	Used
	TRUE	High	LIALLEVLSQKK		FALSE	0.0120393	0.000480221	1	1	2	XP_867483.1	1	1354.87	0	0.418	0.642977	0	141.1	58.9	7.12317e+06	2.97638e+06		High	High	High	0.0001485	0.0006329	1.32	79.82	Used
	TRUE	High	VTYCPTEPGNYIINIK	1xCarbamidomethyl [C4]	FALSE	0.00293421	0.000480221	1	1	2	XP_867483.1	0	1881.94	0	0.595	0.850825	0	125.4	74.6	1.95371e+06	1.1618e+06		High	Peak Found	High	0.0001485	0.000208	2.43	57.46	Used
	TRUE	High	VANPSGNLTETYVQDCGDGTYK	1xCarbamidomethyl [C16]; 1xDeamidated [N3]	FALSE	0.0142233	0.000480221	1	1	1	XP_867483.1	0	2390.05	0								Not Reliable	High	Not Found	High	0.0001485	0.0007579	2.11		Not Used
	TRUE	High	AEISCTDNQDGTCSVSYLPVLPGDYSILVK	2xCarbamidomethyl [C5; C13]; 1xDeamidated [N/Q]	FALSE	0.00554424	0.000480221	1	1	4	XP_867483.1	0	3302.54	0								No Quan Values	High	Not Found	High	0.0001485	0.0003223	3.24		Not Used
	TRUE	High	AGNNMLLVGVHGPR	1xDeamidated [N]; 1xOxidation [M5]	FALSE	0.0228044	0.000666919	1	1	6	XP_867483.1	0	1451.74	0	0.237	0.250362	0	161.7	38.3	732117	173600		High	High	High	0.0002019	0.001669	2.23	29.8	Used
	TRUE	High	VEPGLGADNSVVR		FALSE	0.0198382	0.000666919	1	1	1	XP_867483.1	0	1312.69	0	0.113	0.0173956	0	179.7	20.3	4.88909e+06	553458		High	Peak Found	High	0.0002019	0.001142	2.36	23.6	Used
	TRUE	High	FNEEHIPDSPFVVPVASPSGDAR	1xDeamidated [N2]	FALSE	0.025186	0.000666919	1	1	1	XP_867483.1	0	2468.17	0								Not Reliable	High	Not Found	High	0.0002019	0.001594	2.43		Not Used
	TRUE	High	GTVEPQLEAR		FALSE	0.0202374	0.000666919	1	1	1	XP_867483.1	0	1099.57	0	0.371	0.580582	0	145.8	54.2	141654	52611.1		High	Peak Found	High	0.0002019	0.001173	1.3	17.79	Used
	TRUE	High	FNGTHIPGSPFK		FALSE	0.0169123	0.000666919	1	1	3	XP_867483.1	0	1301.66	0	0.442	0.680367	0	138.7	61.3	1.46366e+07	6468761		High	High	High	0.0002602	0.001889	2.21	34.03	Used
	TRUE	High	FVPREEGPYEVEVTYDGVPVPGSPFPVEALPPTKPSK		FALSE	0.0176011	0.000666919	1	1	5	XP_867483.1	1	4011.04	0	0.425	0.654974	0	140.4	59.6	1.64221e+07	6.97665e+06		High	High	High	0.005071	0.0662	2.65	78.62	Used
	TRUE	High	YGGQPVPNFPSKLQVEPAVDTSGVQCYGPGIEGQGVFR	1xCarbamidomethyl [C26]; 2xDeamidated [Q/N]	FALSE	0.0186866	0.000666919	1	1	4	XP_867483.1	1	4036.94	0								No Quan Values	High	Not Found	High	0.0002602	0.002422	4.61		Not Used
	TRUE	High	ITGPSGTAVPCKVEPGLGADNSVVR	1xCarbamidomethyl [C11]; 1xDeamidated [N21]	FALSE	0.019318	0.000666919	1	1	4	XP_867483.1	1	2482.26	0								Not Reliable	High	High	High	0.0002019	0.001097	2.49		Not Used
	TRUE	High	DKGEYTLVVK		FALSE	0.0237292	0.000666919	1	1	3	XP_867483.1	1	1151.63	0	0.884	0.9743	0	106.2	93.8	1.30824e+06	1.1561e+06		High	High	High	0.0002019	0.001454	2.66	24.19	Used
	TRUE	High	LYNVSYLLK		FALSE	0.0222076	0.000666919	1	1	3	XP_867483.1	0	1112.64	0	0.563	0.825073	0	128	72	5207311	2.93196e+06		High	Peak Found	High	0.0002019	0.001323	1.6	56.47	Used
	TRUE	High	YGGQPVPNFPSKLQVEPAVDTSGVQCYGPGIEGQGVFR	1xCarbamidomethyl [C26]; 1xDeamidated [Q25]	FALSE	0.0307038	0.000865703	1	1	1	XP_867483.1	1	4035.95	0								No Quan Values	High	Not Found	High	0.0002602	0.002136	4.63		Not Used
	TRUE	High	THIQDNHDGTYTVAYVPDVTGR		FALSE	0.0283676	0.000865703	1	1	1	XP_867483.1	0	2459.16	0	0.701	0.903199	0	117.5	82.5	1.22455e+06	858985		High	Peak Found	High	0.0002602	0.001902	2.57	37.6	Used
	TRUE	High	FNGTHIPGSPFK	1xDeamidated [N2]	FALSE	0.0307038	0.000865703	1	1	1	XP_867483.1	0	1302.65	0	0.403	0.616822	0	142.5	57.5	1.95793e+06	789940		High	Peak Found	High	0.0002602	0.002153	2.76	38.71	Used
	TRUE	High	GAGSGDLKVTVK		FALSE	0.0299049	0.000865703	1	1	2	XP_867483.1	1	1131.64	0	0.435	0.680215	0	139.4	60.6	187967	81696.3		High	High	High	0.001527	0.01934	2.72	15.59	Used
	TRUE	High	EAMQQADDWLGIPQVITPEEIVDPNVDEHSVMTYLSQFPK	2xOxidation [M3; M32]	FALSE	0.0332275	0.000865703	1	1	1	XP_867483.1	0	4602.17	0	0.01	9.75497e-17		200		2.1311e+06			High	Not Found	High	0.0002602	0.002424	2.54	110.22	Used
	TRUE	High	LLGWIQNK		FALSE	0.0334467	0.000865703	2	12	1	XP_867483.1; XP_539385.1	0	971.567	0	0.436	0.670929	0	139.3	60.7	4618680	2.01457e+06	Shared	High	Peak Found	High	0.0002602	0.002451	1.96	40.98	Used
	TRUE	High	LLGWIQNKLPQLPITNFSR		FALSE	0.0291263	0.000865703	1	1	2	XP_867483.1	1	2238.28	0	0.21	0.158754	0	165.2	34.8	1.0521e+06	221328		High	Peak Found	High	0.0002602	0.001981	2.89	91.96	Used
	TRUE	High	ALGALVDSCAPGLCPDWDSWDASKPVNNAR	2xCarbamidomethyl [C9; C14]; 2xDeamidated [N27; N28]	FALSE	0.0394085	0.00101489	1	1	1	XP_867483.1	0	3244.47	0								No Quan Values	High	Not Found	High	0.000303	0.003246	3.37		Not Used
	TRUE	High	TPCEEILVK	1xCarbamidomethyl [C3]	FALSE	0.0463969	0.00101489	1	1	2	XP_867483.1	0	1088.57	0	4.114	0.23488	0	39.1	160.9	550559	2265095		High	High	High	0.000303	0.004346	1.54	26.43	Used
	TRUE	High	GKPDVQFSGLAK	1xDeamidated [Q6]	FALSE	0.0341129	0.00101489	1	1	1	XP_867483.1	0	1247.66	0	0.01	9.75497e-17		200		235425			High	Not Found	High	0.000303	0.002544	2.41	28.09	Used
	TRUE	High	VKETADFKVYTK		FALSE	0.0399277	0.00101489	1	1	1	XP_867483.1	2	1428.77	0								No Quan Values	High	Not Found	High	0.000303	0.003313	2.72		Not Used
	TRUE	High	AEFTVETR		FALSE	0.0440393	0.00101489	1	1	1	XP_867483.1	0	952.473	0	0.351	0.541134	0	148	52	143735	50475.1		High	Peak Found	High	0.000303	0.003923	1.68	19.3	Used
	TRUE	High	SAGQGEVLVYVEDPAGHQEEAKVTANNDKNR	1xDeamidated [N30]	FALSE	0.0383896	0.00101489	1	1	1	XP_867483.1	2	3326.59	0	0.25	0.274391	0	160	40	740499	185366		High	Peak Found	High	0.000303	0.003088	3.07	38.2	Used
	TRUE	High	VGSAADIPINISETDLSLLTATVVPPSGREEPCLLK	1xCarbamidomethyl [C33]; 1xDeamidated [N10]	FALSE	0.035252	0.00101489	1	1	1	XP_867483.1	1	3763.97	0	0.01	9.75497e-17		200		2.42273e+06			High	Not Found	High	0.000303	0.002687	2.51	105.74	Used
	TRUE	High	ENGVYLIDVK		FALSE	0.0434683	0.00101489	1	1	1	XP_867483.1	0	1149.62	0	0.483	0.737591	0	134.8	65.2	2.91871e+06	1.41098e+06		Peak Found	High	High	0.000303	0.003866	1.86	40.21	Used
	TRUE	High	AYGPGIEPTGNMVKK		FALSE	0.0470051	0.00101489	1	1	1	XP_867483.1	1	1561.8	0								No Quan Values	High	Not Found	High	0.000303	0.00445	2.44		Not Used
	TRUE	High	VQVQDNEGCPVDATVK	1xCarbamidomethyl [C9]; 2xDeamidated [Q2; Q/N]	FALSE	0.0409862	0.00101489	1	1	2	XP_867483.1	0	1760.8	0								Not Reliable	Not Found	High	High	0.0004148	0.005663	1.8		Not Used
	TRUE	High	QMQLENVSVALEFLDRESIK		FALSE	0.0605204	0.00139497	1	8	1	XP_867483.1	1	2349.21	0								Not Reliable	Not Found	High	High	0.0004148	0.007094	1.5		Not Used
	TRUE	High	AGNNMLLVGVHGPR		FALSE	0.0542241	0.00139497	1	1	2	XP_867483.1	0	1434.76	0								No Quan Values	High	Not Found	High	0.0004148	0.00575	2.36		Not Used
	TRUE	High	YKGQHVPGSPFQFTVGPLGEGGAHK	1xDeamidated [Q12]	FALSE	0.0563711	0.00139497	1	1	1	XP_867483.1	1	2596.29	0								Not Reliable	High	Not Found	High	0.0004148	0.00618	3.09		Not Used
	TRUE	High	GDAVRDVDIIDHHDNTYTVK	1xDeamidated [N15]	FALSE	0.0567368	0.00139497	1	1	1	XP_867483.1	1	2284.08	0								Not Reliable	High	Not Found	High	0.0004148	0.006263	2.64		Not Used
	TRUE	High	YKGQHVPGSPFQFTVGPLGEGGAHK		FALSE	0.0605204	0.00139497	1	1	2	XP_867483.1	1	2595.31	0	0.504	0.758432	0	133	67	3.2286e+06	1.62761e+06		High	High	High	0.0004148	0.007074	2.24	50.67	Used
	TRUE	High	KRAEFTVETR		FALSE	0.0593607	0.00139497	1	1	1	XP_867483.1	2	1236.67	0	0.493	0.748931	0	133.9	66.1	176592	87132.2		Peak Found	High	High	0.0004148	0.006818	1.71	14.17	Used
	TRUE	High	CSYQPTMEGVHTVHVTFAGVPIPR	1xCarbamidomethyl [C1]; 1xOxidation [M7]	FALSE	0.0679446	0.00196464	1	1	1	XP_867483.1	0	2699.31	0								No Quan Values	High	Not Found	High	0.0006407	0.008709	2.12		Not Used
	TRUE	High	RIANLQTDLSDGLR		FALSE	0.069263	0.00196464	1	1	1	XP_867483.1	1	1571.85	0	0.558	0.821033	0	128.4	71.6	1.03236e+06	576199		High	Peak Found	High	0.0006407	0.009076	2.27	39.52	Used
	TRUE	High	LLGWIQNKLPQLPITNFSR	1xDeamidated [Q11]	FALSE	0.0715144	0.00234546	1	1	1	XP_867483.1	1	2239.26	0								Not Reliable	High	Not Found	High	0.0007517	0.009639	2.39		Not Used
	TRUE	High	LTVSSLQESGLKVNQPASFAVSLNGAK	1xDeamidated [Q7]	FALSE	0.0772024	0.0029162	1	1	1	XP_867483.1	1	2746.46	0								No Quan Values	High	Not Found	High	0.0009749	0.01105	2.39		Not Used
	TRUE	High	ASGPGLNTTGVPASLPVEFTIDAKDAGEGLLAVQITDPEGKPK		FALSE	0.0807141	0.00309549	1	1	1	XP_867483.1	1	4261.22	0	0.01	9.75497e-17		200		968453			High	Not Found	High	0.001025	0.01197	1.74	99.4	Used
	TRUE	High	VNVGAGSHPNKVKVYGPGVAK		FALSE	0.0957046	0.00414812	1	1	1	XP_867483.1	2	2078.15	0								No Quan Values	High	Not Found	High	0.001436	0.0164	1.84		Not Used
	TRUE	High	QMQLENVSVALEFLDRESIK	1xDeamidated [N6]; 1xOxidation [M2]	FALSE	0.107756	0.00429596	1	8	1	XP_867483.1	1	2366.19	0								Not Reliable	Not Found	High	High	0.001527	0.02004	2.25		Not Used
	TRUE	High	VDVGKDQEFTVK	1xDeamidated [Q7]	FALSE	0.101249	0.00429596	1	1	1	XP_867483.1	1	1365.69	0	0.01	9.75497e-17		200		114458			High	Not Found	High	0.001527	0.01804	1.99	24.25	Used
	TRUE	High	DLAEDAPWKK		FALSE	0.101883	0.00429596	2	12	1	XP_867483.1; XP_539385.1	1	1172.59	0	0.01	9.75497e-17		200		500384		Shared	High	Not Found	High	0.001527	0.0182	2.01	28.49	Used
	TRUE	High	CSYQPTMEGVHTVHVTFAGVPIPR	1xCarbamidomethyl [C1]; 1xDeamidated [Q4]; 1xOxidation [M7]	FALSE	0.116788	0.00537309	1	1	1	XP_867483.1	0	2700.29	0								Not Reliable	High	Not Found	High	0.001947	0.02322	2.31		Not Used
	TRUE	High	ITGPSGTAVPCK	1xCarbamidomethyl [C11]	FALSE	0.153594	0.00734612	1	1	1	XP_867483.1	0	1187.61	0	0.01	9.75497e-17		200		86751.8			High	Not Found	High	0.002664	0.03682	2.5	16.03	Used
	TRUE	High	TTYFEIFTAGAGTGEVEVVIQDPTGQK	1xDeamidated [Q26]	FALSE	0.158265	0.00784511	1	1	1	XP_867483.1	0	2859.39	0								No Quan Values	Not Found	High	High	0.002806	0.03837	2.36		Not Used
	TRUE	High	EEGPYEVEVTYDGVPVPGSPFPVEALPPTKPSK		FALSE	0.176129	0.00984038	1	1	1	XP_867483.1	0	3511.75	0	0.01	9.75497e-17		200		1.40558e+06			High	Not Found	High	0.003635	0.0459	2.43	80.14	Used
	TRUE	High	AYGPGIEPTGNMVK		FALSE	0.179271	0.00984038	1	1	1	XP_867483.1	0	1433.71	0	0.39	0.580831	0	143.9	56.1	6.51648e+06	2.54136e+06		High	Peak Found	High	0.003681	0.04733	2.35	30.62	Used
TRUE	High	Master Protein	XP_544610.3	thrombospondin-1 [Canis lupus familiaris]	0	FALSE	637.543	50	56	798	18	1	1170	129.5	4.98	1734.76	56	45	1.88	0.955956	57.63	60.1	139.9	7.36234e+08	1.71371e+09	High	High
	Checked	Confidence	Sequence	Modifications	Contaminant	Qvality PEP	Qvality q-value	# Protein Groups	# Proteins	# PSMs	Master Protein Accessions	# Missed Cleavages	Theo. MH+ [Da]	# Razor Quan Results	Abundance Ratio: (F4, Sample) / (F3, Control)	Abundance Ratio Adj. P-Value: (F4, Sample) / (F3, Control)	Abundance Ratio Variability [%]: (F4, Sample) / (F3, Control)	Abundances (Grouped): F3, Control	Abundances (Grouped): F4, Sample	Abundance: F3: Control	Abundance: F4: Sample	Quan Info	Found in Sample: [S3] F3: Control	Found in Sample: [S4] F4: Sample	Confidence (by Search Engine): Sequest HT	Percolator q-Value (by Search Engine): Sequest HT	Percolator PEP (by Search Engine): Sequest HT	XCorr (by Search Engine): Sequest HT	Top Apex RT [min]	Quan Usage
	TRUE	High	LCNSPSPQMNGKPCEGEAR	2xCarbamidomethyl [C2; C14]; 1xDeamidated [N10]; 1xOxidation [M9]	FALSE	0.000567374	0	1	1	1	XP_544610.3	0	2148.91	0								No Quan Values	Not Found	High	High	0	5.881e-05	2.24		Not Used
	TRUE	High	IEDANLIPPVPDDKFQDLVDAVR		FALSE	1.0045e-05	0	1	1	23	XP_544610.3	1	2579.34	0	2.619	0.567021	0	55.3	144.7	6.47687e+07	1.69621e+08		High	High	High	0.0001092	0.0001697	3.43	83.7	Used
	TRUE	High	IRLCNSPSPQMNGKPCEGEAR	2xCarbamidomethyl [C4; C16]; 1xOxidation [M11]	FALSE	0.000537718	0	1	1	4	XP_544610.3	1	2417.11	0	1.167	0.971875	0	92.3	107.7	402740	469976		High	High	High	0.008048	0.1033	2.8	15.65	Used
	TRUE	High	IRLCNSPSPQMNGKPCEGEAR	2xCarbamidomethyl [C4; C16]; 1xDeamidated [Q/N]; 1xOxidation [M11]	FALSE	1.41488e-06	0	1	1	10	XP_544610.3	1	2418.1	0	1.114	0.9743	0	94.6	105.4	826937	921205		High	High	High	0	3.422e-07	4.37	16.39	Used
	TRUE	High	IRLCNSPSPQMNGKPCEGEAR	2xCarbamidomethyl [C4; C16]; 2xDeamidated [N12; N/Q]	FALSE	0.00068926	0	1	1	3	XP_544610.3	1	2403.08	0								Not Reliable	High	High	High	0.0004148	0.006253	3.97		Not Used
	TRUE	High	IRLCNSPSPQMNGKPCEGEAR	2xCarbamidomethyl [C4; C16]; 1xDeamidated [N/Q]	FALSE	0.00102399	0	1	1	8	XP_544610.3	1	2402.1	0	1.992	0.814671	0	66.8	133.2	170544	339802		High	High	High	0.002664	0.03626	3.87	21.07	Used
	TRUE	High	KDHSGQVFSVVSNGR		FALSE	1.69602e-06	0	1	1	25	XP_544610.3	1	1616.81	0	3.671	0.305165	0	42.8	157.2	2.19573e+07	8.06032e+07		High	High	High	0	1.939e-06	4.36	21.45	Used
	TRUE	High	KDHSGQVFSVVSNGR	1xDeamidated [N/Q]	FALSE	6.58105e-06	0	1	1	56	XP_544610.3	1	1617.8	0	2.928	0.472374	0	50.9	149.1	1.18477e+07	3.46859e+07		High	High	High	0	1.069e-05	3.94	23.29	Used
	TRUE	High	KDHSGQVFSVVSNGR	2xDeamidated [Q6; N13]	FALSE	0.000376775	0	1	1	1	XP_544610.3	1	1618.78	0	100	9.75497e-17			200		225211		Not Found	High	High	0	4.169e-05	2.6	25.62	Used
	TRUE	High	KVTEENKELAIELR		FALSE	4.1137e-06	0	1	1	18	XP_544610.3	2	1671.93	0	2.27	0.680215	0	61.2	138.8	6.98718e+07	1.58613e+08		High	High	High	0	8.598e-07	3.76	29.2	Used
	TRUE	High	KVTEENKELAIELR	1xDeamidated [N6]	FALSE	0.000489499	0	1	1	2	XP_544610.3	2	1672.91	0	2.824	0.500572	0	52.3	147.7	626164	1.76833e+06		High	High	High	0.002471	0.03126	3.16	32.05	Used
	TRUE	High	NNEEWTVDSCTECR	2xCarbamidomethyl [C10; C13]	FALSE	5.99077e-06	0	1	1	7	XP_544610.3	0	1799.7	0	1.407	0.907887	0	83.1	116.9	3.03395e+06	4.26796e+06		High	High	High	0	1.19e-06	3.29	25.56	Used
	TRUE	High	NNEEWTVDSCTECR	2xCarbamidomethyl [C10; C13]; 1xDeamidated [N]	FALSE	8.9018e-06	0	1	1	6	XP_544610.3	0	1800.68	0	100	9.75497e-17			200		598415		High	High	High	0	1.669e-06	4.29	28.37	Used
	TRUE	High	NALWHTGNTPGQVR		FALSE	0.000854337	0	1	1	15	XP_544610.3	0	1550.78	0	1.516	0.888223	0	79.5	120.5	4.36433e+07	6.61844e+07		High	High	High	0.0008078	0.01014	2.73	26.18	Used
	TRUE	High	DNCQYVYNVDQR	1xCarbamidomethyl [C3]; 1xDeamidated [N/Q]	FALSE	0.00012617	0	1	1	3	XP_544610.3	0	1574.65	0	0.571	0.828457	0	127.3	72.7	260547	148767		High	High	High	0	1.637e-05	3.16	25.77	Used
	TRUE	High	VTEENKELAIELR		FALSE	0.000240321	0	1	1	14	XP_544610.3	1	1543.83	0	2.382	0.646701	0	59.1	140.9	3.10227e+07	73889776		High	High	High	0	6.534e-05	3.05	32.99	Used
	TRUE	High	DNCQYVYNVDQR	1xCarbamidomethyl [C3]	FALSE	0.000187474	0	1	1	7	XP_544610.3	0	1573.67	0	0.855	0.971875	0	107.8	92.2	5.85927e+06	5008713		High	High	High	0	3.632e-05	3.44	24.84	Used
	TRUE	High	AGTLDLSLTVQGMQHVVSVEEALLATGQWK	2xDeamidated [Q14; Q28]; 1xOxidation [M13]	FALSE	4.31061e-05	0	1	1	3	XP_544610.3	0	3199.62	0								No Quan Values	Not Found	High	High	0	6.501e-06	5.27		Not Used
	TRUE	High	AGTLDLSLTVQGMQHVVSVEEALLATGQWK	1xDeamidated [Q]; 1xOxidation [M13]	FALSE	9.65063e-07	0	1	1	12	XP_544610.3	0	3198.64	0								No Quan Values	High	High	High	0	2.457e-07	5.04		Not Used
	TRUE	High	AGTLDLSLTVQGMQHVVSVEEALLATGQWK	1xOxidation [M13]	FALSE	5.56306e-05	0	1	1	6	XP_544610.3	0	3197.65	0	100	9.75497e-17			200		1.34337e+06		High	High	High	0.0002019	0.001263	4.17	101.09	Used
	TRUE	High	AGTLDLSLTVQGMQHVVSVEEALLATGQWK	1xDeamidated [Q]	FALSE	0.0001564	0	1	1	4	XP_544610.3	0	3182.64	0								No Quan Values	High	High	High	0	1.97e-05	4.7		Not Used
	TRUE	High	FVFGTTPEAILR		FALSE	8.43434e-05	0	1	1	35	XP_544610.3	0	1350.74	0	2.749	0.523618	0	53.3	146.7	7.6437e+07	2.10133e+08		High	High	High	0.0001092	0.000191	3.1	65.91	Used
	TRUE	High	DHSGQVFSVVSNGR		FALSE	4.34065e-06	0	1	1	14	XP_544610.3	0	1488.72	0	4.181	0.22474	0	38.6	161.4	5.43821e+06	2.27396e+07		High	High	High	0	1.573e-05	4.15	27.31	Used
	TRUE	High	DHSGQVFSVVSNGR	1xDeamidated [N/Q]	FALSE	1.70706e-05	0	1	1	27	XP_544610.3	0	1489.7	0	7.256	0.0387095	0	24.2	175.8	3.10776e+06	2.25494e+07		High	High	High	0	8.9e-06	3.45	26.17	Used
	TRUE	High	CSYLGHYSDPMYR	1xCarbamidomethyl [C1]; 1xOxidation [M11]	FALSE	5.23817e-06	0	1	1	4	XP_544610.3	0	1664.68	0	1.752	0.831312	0	72.7	127.3	6.9619e+06	1.21952e+07		High	High	High	0	1.057e-06	3.48	28.1	Used
	TRUE	High	CSYLGHYSDPMYR	1xCarbamidomethyl [C1]	FALSE	0.0058102	0.000480221	1	1	1	XP_544610.3	0	1648.69	0								No Quan Values	Not Found	High	High	0.0001485	0.0003347	1.23		Not Used
	TRUE	High	TRGTLLAIER		FALSE	0.00303419	0.000480221	1	1	3	XP_544610.3	1	1129.67	0	12.944	0.0026382	0	14.3	185.7	545483	7060585		High	High	High	0.0002019	0.001257	2.35	25.8	Used
	TRUE	High	NALWHTGNTPGQVR	1xDeamidated [N/Q]	FALSE	0.010748	0.000480221	1	1	14	XP_544610.3	0	1551.77	0	1.561	0.877459	0	78.1	121.9	5.03256e+06	7.85679e+06		High	High	High	0.001527	0.01904	3.21	27.3	Used
	TRUE	High	AGTLDLSLTVQGMQHVVSVEEALLATGQWK		FALSE	0.00320128	0.000480221	1	1	2	XP_544610.3	0	3181.66	0								No Quan Values	Not Found	High	High	0.000303	0.003745	2.14		Not Used
	TRUE	High	FTGPQPFGR		FALSE	0.0060889	0.000480221	1	1	3	XP_544610.3	0	1006.51	0	0.64	0.877459	0	122	78	22594246	14455729		High	High	High	0.0001485	0.0003462	2.05	28.33	Used
	TRUE	High	IEDANLIPPVPDDKFQDLVDAVR	1xDeamidated [Q/N]	FALSE	0.00311662	0.000480221	1	1	24	XP_544610.3	1	2580.32	0								Not Reliable	High	High	High	0.0001485	0.0003022	3.8		Not Used
	TRUE	High	LCNNPTPQFGGKDCVGDATENQICNK	3xCarbamidomethyl [C2; C14; C24]	FALSE	0.00375972	0.000480221	1	1	2	XP_544610.3	1	2937.29	0	3.314	0.380668	0	46.4	153.6	663886	2.19991e+06		High	High	High	0.0001485	0.0002459	2.72	32.46	Used
	TRUE	High	GTLLAIER		FALSE	0.00891456	0.000480221	1	1	4	XP_544610.3	0	872.52	0	15.328	0.0010371	0	12.2	187.8	985643	15107626		High	High	High	0.0001485	0.0004739	1.89	30.08	Used
	TRUE	High	GPDPSSPAFRIEDANLIPPVPDDKFQDLVDAVR	2xDeamidated [N15; Q26]	FALSE	0.00407441	0.000480221	1	1	2	XP_544610.3	2	3592.78	0								No Quan Values	High	Not Found	High	0.0001485	0.0002597	3.99		Not Used
	TRUE	High	IRLCNSPSPQMNGKPCEGEAR	2xCarbamidomethyl [C4; C16]	FALSE	0.0029738	0.000480221	1	1	2	XP_544610.3	1	2401.12	0	1.369	0.971066	0	84.4	115.6	61896	84734.8		High	High	High	0.0001485	0.00021	4.38	20.27	Used
	TRUE	High	GPDPSSPAFRIEDANLIPPVPDDKFQDLVDAVR		FALSE	0.0173685	0.000666919	1	1	2	XP_544610.3	2	3590.81	0	0.947	0.987784	0	102.7	97.3	5.60494e+06	5310468		High	Peak Found	High	0.0002019	0.0009598	2.84	92.37	Used
	TRUE	High	LCNNPTPQFGGKDCVGDATENQICNK	3xCarbamidomethyl [C2; C14; C24]; 1xDeamidated [N/Q]	FALSE	0.0283676	0.000865703	1	1	3	XP_544610.3	1	2938.28	0								No Quan Values	High	Not Found	High	0.0002602	0.00189	2.72		Not Used
	TRUE	High	IRLCNSPSPQMNGKPCEGEAR	2xCarbamidomethyl [C4; C16]; 2xDeamidated [Q10; N12]; 1xOxidation [M11]	FALSE	0.0321523	0.000865703	1	1	2	XP_544610.3	1	2419.08	0								Not Reliable	High	High	High	0.0002602	0.002315	2.95		Not Used
	TRUE	High	LCNSPSPQMNGKPCEGEAR	2xCarbamidomethyl [C2; C14]; 1xOxidation [M9]	FALSE	0.0679446	0.00196464	1	1	2	XP_544610.3	0	2147.93	0								No Quan Values	High	High	High	0.002248	0.02536	2.05		Not Used
	TRUE	High	GPDPSSPAFRIEDANLIPPVPDDKFQDLVDAVR	1xDeamidated [Q26]	FALSE	0.102521	0.00429596	1	1	4	XP_544610.3	2	3591.8	0								Not Reliable	High	High	High	0.001527	0.01839	3.66		Not Used
	TRUE	High	LCNSPSPQMNGKPCEGEAR	2xCarbamidomethyl [C2; C14]; 2xDeamidated [Q8; N10]; 1xOxidation [M9]	FALSE	0.158265	0.00784511	1	1	1	XP_544610.3	0	2149.89	0								Not Reliable	Not Found	High	High	0.002806	0.03842	1.46		Not Used
TRUE	High	Master Protein	NP_001104237.1	myosin-9 [Canis lupus familiaris]	0	FALSE	595.383	47	82	352	82	1	1960	226.3	5.6	668.28	82	0	0.779	0.897564	22.26	104.9	95.1	1.49563e+08	1.35559e+08	High	High
	Checked	Confidence	Sequence	Modifications	Contaminant	Qvality PEP	Qvality q-value	# Protein Groups	# Proteins	# PSMs	Master Protein Accessions	# Missed Cleavages	Theo. MH+ [Da]	# Razor Quan Results	Abundance Ratio: (F4, Sample) / (F3, Control)	Abundance Ratio Adj. P-Value: (F4, Sample) / (F3, Control)	Abundance Ratio Variability [%]: (F4, Sample) / (F3, Control)	Abundances (Grouped): F3, Control	Abundances (Grouped): F4, Sample	Abundance: F3: Control	Abundance: F4: Sample	Quan Info	Found in Sample: [S3] F3: Control	Found in Sample: [S4] F4: Sample	Confidence (by Search Engine): Sequest HT	Percolator q-Value (by Search Engine): Sequest HT	Percolator PEP (by Search Engine): Sequest HT	XCorr (by Search Engine): Sequest HT	Top Apex RT [min]	Quan Usage
	TRUE	High	LKDVLLQVDDERR		FALSE	0.00123557	0	1	1	4	NP_001104237.1	2	1598.89	0	0.859	0.971875	0	107.6	92.4	5.92626e+06	5.09252e+06		High	High	High	0	0.00011	2.12	32.06	Used
	TRUE	High	LKKLEEDQIIMEDQNCK	1xCarbamidomethyl [C16]; 1xOxidation [M11]	FALSE	2.32459e-05	0	1	1	1	NP_001104237.1	2	2150.05	0								No Quan Values	High	Not Found	High	0	3.824e-06	3.5		Not Used
	TRUE	High	LKNKHEAMITDLEER	1xOxidation [M8]	FALSE	1.36818e-06	0	1	1	3	NP_001104237.1	2	1842.94	0	0.777	0.941222	0	112.6	87.4	604938	469848		High	High	High	0	3.31e-07	3.89	16.48	Used
	TRUE	High	LEEDQIIMEDQNCK	1xCarbamidomethyl [C13]; 1xOxidation [M8]	FALSE	4.83278e-06	0	1	1	2	NP_001104237.1	0	1780.77	0	0.676	0.89828	0	119.3	80.7	713098	482399		High	High	High	0	1.406e-06	3.56	26.52	Used
	TRUE	High	LQQELDDLLVDLDHQR		FALSE	3.69395e-05	0	1	1	2	NP_001104237.1	0	1949.99	0	0.741	0.922256	0	114.9	85.1	1.11426e+06	825278		High	High	High	0	5.688e-06	3.24	82.32	Used
	TRUE	High	IRELESQISELQEDLESER	1xDeamidated [Q]	FALSE	0.00012617	0	1	1	3	NP_001104237.1	1	2304.12	0								Not Reliable	High	High	High	0	4.92e-05	4.32		Not Used
	TRUE	High	LQQELDDLLVDLDHQR	1xDeamidated [Q]	FALSE	3.54813e-05	0	1	1	3	NP_001104237.1	0	1950.98	0								Not Reliable	Not Found	High	High	0	5.514e-06	2.52		Not Used
	TRUE	High	LQQLFNHTMFILEQEEYQR	1xOxidation [M9]	FALSE	3.57203e-05	0	1	15	2	NP_001104237.1	0	2483.2	0								No Quan Values	High	High	High	0	5.551e-06	3.46		Not Used
	TRUE	High	LQQLFNHTMFILEQEEYQR	1xDeamidated [Q/N]; 1xOxidation [M9]	FALSE	0.000251881	0	1	15	4	NP_001104237.1	0	2484.19	0								Not Reliable	High	High	High	0	2.953e-05	3.44		Not Used
	TRUE	High	LQVELDNVMGLLTQSDSK	1xOxidation [M9]	FALSE	6.23697e-06	0	1	1	4	NP_001104237.1	0	2006.01	0								No Quan Values	High	High	High	0	1.228e-06	4.82		Not Used
	TRUE	High	LQVELDNVMGLLTQSDSK	1xDeamidated [N/Q]; 1xOxidation [M9]	FALSE	0.000220241	0	1	1	4	NP_001104237.1	0	2007	0								No Quan Values	High	High	High	0	3.715e-05	3.99		Not Used
	TRUE	High	IIGLDQVAGMSETALPGAFK	1xOxidation [M10]	FALSE	1.81417e-07	0	1	1	7	NP_001104237.1	0	2034.06	0	0.706	0.906891	0	117.3	82.7	5772217	4.07243e+06		High	High	High	0	5.807e-08	3.59	68.84	Used
	TRUE	High	IIGLDQVAGMSETALPGAFK	1xDeamidated [Q6]; 1xOxidation [M10]	FALSE	0.000782978	0	1	1	5	NP_001104237.1	0	2035.04	0								Not Reliable	High	High	High	0	7.636e-05	3.58		Not Used
	TRUE	High	INFDVNGYIVGANIETYLLEK		FALSE	0.00117102	0	1	1	2	NP_001104237.1	0	2385.23	0	0.732	0.918705	0	115.5	84.5	853841	624695		High	High	High	0.0001485	0.0002227	1.84	105.46	Used
	TRUE	High	HSQAVEELAEQLEQTKR		FALSE	0.00179875	0	1	1	1	NP_001104237.1	1	1996.01	0								Not Reliable	High	Not Found	High	0	0.0001471	2.21		Not Used
	TRUE	High	KEEELQAALAR		FALSE	0.000260478	0	1	5	3	NP_001104237.1	1	1257.68	0	0.306	0.406161	0	153.1	46.9	735597	225282		High	High	High	0	3.042e-05	2.4	22.79	Used
	TRUE	High	KANLQIDQINTDLNLER		FALSE	4.19641e-05	0	1	1	1	NP_001104237.1	1	1998.06	0								No Quan Values	Not Found	High	High	0	6.36e-06	1.73		Not Used
	TRUE	High	VISGVLQLGNIVFK		FALSE	0.000205944	0	1	1	4	NP_001104237.1	0	1486.9	0	0.01	9.75497e-17		200		788715			High	High	High	0.0001485	0.000262	3.01	87.79	Used
	TRUE	High	VISGVLQLGNIVFKK		FALSE	0.00131246	0	1	1	2	NP_001104237.1	1	1614.99	0	0.925	0.978327	0	103.9	96.1	4.79869e+06	4.43807e+06		High	High	High	0	0.0001155	3.44	77.46	Used
	TRUE	High	KVIQYLAHVASSHK		FALSE	0.000598666	0	1	7	2	NP_001104237.1	1	1580.89	0	1.276	0.942464	0	87.9	112.1	1.30369e+06	1.66347e+06		High	High	High	0.0001485	0.0003999	2.18	28.69	Used
	TRUE	High	IAQLEEELEEEQGNTELVNDR		FALSE	1.81336e-05	0	1	1	5	NP_001104237.1	0	2458.16	0	0.993	0.997709	0	100.3	99.7	2.40355e+06	2.387e+06		High	High	High	0	3.087e-06	3.51	56.52	Used
	TRUE	High	IAQLEEELEEEQGNTELVNDR	1xDeamidated [N/Q]	FALSE	2.55421e-06	0	1	1	5	NP_001104237.1	0	2459.14	0								No Quan Values	High	High	High	0	4.546e-05	3.61		Not Used
	TRUE	High	IAQLEEELEEEQGNTELVNDRLK	1xDeamidated [N]	FALSE	0.000552347	0	1	1	2	NP_001104237.1	1	2700.32	0								Not Reliable	High	Not Found	High	0	5.742e-05	4.03		Not Used
	TRUE	High	IAQLEEQLDNETK		FALSE	5.63824e-05	0	1	1	2	NP_001104237.1	0	1530.76	0	0.976	0.992262	0	101.2	98.8	3412764	3.32989e+06		High	High	High	0	8.19e-06	3.32	31.26	Used
	TRUE	High	KLEEDQIIMEDQNCK	1xCarbamidomethyl [C14]	FALSE	1.29636e-05	0	1	1	1	NP_001104237.1	1	1892.87	0								No Quan Values	High	Not Found	High	0	2.318e-06	3.14		Not Used
	TRUE	High	KLEEDQIIMEDQNCK	1xCarbamidomethyl [C14]; 1xOxidation [M9]	FALSE	2.18831e-05	0	1	1	4	NP_001104237.1	1	1908.87	0	0.599	0.852006	0	125.1	74.9	1.34848e+06	807271		High	High	High	0	6.102e-05	4.08	23.05	Used
	TRUE	High	KLEEDQIIMEDQNCK	1xCarbamidomethyl [C14]; 1xDeamidated [Q6]; 1xOxidation [M9]	FALSE	2.08834e-06	0	1	1	2	NP_001104237.1	1	1909.85	0								Not Reliable	High	High	High	0	4.769e-07	4.34		Not Used
	TRUE	High	KQELEEICHDLEAR	1xCarbamidomethyl [C8]	FALSE	0.000680071	0	1	1	2	NP_001104237.1	1	1769.85	0	1.285	0.940681	0	87.5	112.5	1.26492e+06	1.62514e+06		High	High	High	0	6.808e-05	2.2	38.06	Used
	TRUE	High	KRHEMPPHIYAITDTAYR	1xOxidation [M5]	FALSE	0.00136635	0	1	1	2	NP_001104237.1	2	2215.11	0	1.484	0.89828	0	80.5	119.5	4059198	6025648		High	High	High	0	0.0001192	2.58	27.73	Used
	TRUE	High	KMEDGVGCLETAEEAKR	1xCarbamidomethyl [C8]; 1xOxidation [M2]	FALSE	0.000482973	0	1	1	3	NP_001104237.1	2	1938.89	0	0.641	0.877459	0	121.9	78.1	1.45113e+06	929861		High	High	High	0.0002602	0.001937	2.79	20.91	Used
	TRUE	High	RKLEGDSTDLNDQIAELQAQIAELK	1xDeamidated [Q/N]	FALSE	0.000419485	0	1	1	2	NP_001104237.1	2	2799.44	0								Not Reliable	High	Not Found	High	0	4.571e-05	3.72		Not Used
	TRUE	High	RHEMPPHIYAITDTAYR	1xOxidation [M4]	FALSE	9.97535e-05	0	1	1	3	NP_001104237.1	1	2087.01	0	1.251	0.950768	0	88.8	111.2	3091598	3.86813e+06		High	High	High	0	2.247e-05	2.84	30.91	Used
	TRUE	High	QAQQERDELADEIANSSGK		FALSE	3.62031e-05	0	1	1	5	NP_001104237.1	1	2088.98	0	0.829	0.969808	0	109.4	90.6	8.91632e+06	7.39116e+06		High	High	High	0	5.6e-06	3.4	31.2	Used
	TRUE	High	QAQQERDELADEIANSSGK	1xDeamidated [Q/N]	FALSE	0.00011719	0	1	1	7	NP_001104237.1	1	2089.96	0	0.969	0.99182	0	101.6	98.4	706184	684385		High	High	High	0	1.541e-05	3.24	32.02	Used
	TRUE	High	TLEEEARTHEAQIQEMR	1xOxidation [M16]	FALSE	0.000530549	0	1	1	1	NP_001104237.1	1	2086.98	0	1.087	0.977963	0	95.8	104.2	4041929	4.39523e+06		High	Peak Found	High	0	5.544e-05	2.7	27.55	Used
	TRUE	High	QLLQANPILEAFGNAK		FALSE	0.00105184	0	1	9	4	NP_001104237.1	0	1726.95	0	0.919	0.977963	0	104.2	95.8	3.04303e+06	2.79792e+06		High	High	High	0.0001092	0.0001593	2.97	82.87	Used
	TRUE	High	SMEAEMIQLQEELAAAER	2xOxidation [M2; M6]	FALSE	2.62371e-06	0	1	1	2	NP_001104237.1	0	2080.95	0	1.166	0.971875	0	92.3	107.7	719295	838998		High	High	High	0	5.833e-07	2.55	58.4	Used
	TRUE	High	SMEAEMIQLQEELAAAER	1xDeamidated [Q]; 2xOxidation [M2; M6]	FALSE	3.92398e-05	0	1	1	2	NP_001104237.1	0	2081.94	0								No Quan Values	High	Not Found	High	0	6.012e-06	4.03		Not Used
	TRUE	High	SMMQDREDQSILCTGESGAGK	1xCarbamidomethyl [C13]; 2xOxidation [M2; M3]	FALSE	0.000537718	0	1	1	2	NP_001104237.1	1	2331.98	0	0.601	0.852006	0	124.9	75.1	1.01658e+06	610995		High	High	High	0.002471	0.03123	2.9	21.78	Used
	TRUE	High	SMMQDREDQSILCTGESGAGK	1xCarbamidomethyl [C13]; 1xDeamidated [Q]; 2xOxidation [M2; M3]	FALSE	0.000374255	0	1	1	4	NP_001104237.1	1	2332.97	0								No Quan Values	High	High	High	0.000303	0.003473	3.39		Not Used
	TRUE	High	SGFEPASLKEEVGEEAIVELVENGKK		FALSE	0.00088943	0	1	1	1	NP_001104237.1	2	2788.43	0	0.592	0.848267	0	125.6	74.4	1.19597e+06	708316		High	Peak Found	High	0	8.499e-05	3.52	84.29	Used
	TRUE	High	SGFEPASLKEEVGEEAIVELVENGKK	1xDeamidated [N23]	FALSE	3.38527e-05	0	1	1	3	NP_001104237.1	2	2789.41	0								No Quan Values	High	High	High	0	5.295e-06	4.55		Not Used
	TRUE	High	LTEMETLQSQLMAEK	2xOxidation [M4; M12]	FALSE	9.71109e-05	0	1	1	2	NP_001104237.1	0	1783.85	0	1.934	0.777535	0	68.2	131.8	978065	1.89159e+06		High	High	High	0	1.313e-05	3.11	34.62	Used
	TRUE	High	LTEMETLQSQLMAEK	1xDeamidated [Q8]; 2xOxidation [M4; M12]	FALSE	3.34013e-05	0	1	1	1	NP_001104237.1	0	1784.83	0								Not Reliable	Not Found	High	High	0	5.237e-06	2.69		Not Used
	TRUE	High	NKHEAMITDLEER	1xOxidation [M6]	FALSE	0.00120286	0	1	1	1	NP_001104237.1	1	1601.76	0	0.476	0.732793	0	135.5	64.5	163963	78030.4		High	Peak Found	High	0	0.000108	3.03	17.25	Used
	TRUE	High	NLPIYSEEIVEMYK	1xOxidation [M12]	FALSE	0.000207331	0	1	1	3	NP_001104237.1	0	1743.85	0	1.166	0.971875	0	92.4	107.6	1.10995e+06	1.2937e+06		High	High	High	0	2.504e-05	3.43	63.25	Used
	TRUE	High	MQQNIQELEEQLEEEESAR	1xOxidation [M1]	FALSE	2.29359e-05	0	1	1	2	NP_001104237.1	0	2349.05	0								No Quan Values	High	High	High	0	8.225e-06	4		Not Used
	TRUE	High	MQQNIQELEEQLEEEESAR	1xDeamidated [Q/N]; 1xOxidation [M1]	FALSE	4.03076e-05	0	1	1	6	NP_001104237.1	0	2350.04	0								No Quan Values	High	High	High	0	2.44e-05	3.78		Not Used
	TRUE	High	ADFCIIHYAGK	1xCarbamidomethyl [C4]	FALSE	0.000648867	0	1	7	2	NP_001104237.1	0	1294.62	0	1.646	0.857693	0	75.6	124.4	2.48324e+06	4088332		High	High	High	0.0001485	0.0006716	2.62	39.23	Used
	TRUE	High	DLGEELEALKTELEDTLDSTAAQQELR	1xDeamidated [Q]	FALSE	0.000996881	0	1	1	14	NP_001104237.1	1	3018.46	0								No Quan Values	High	High	High	0	9.287e-05	3.69		Not Used
	TRUE	High	DLGEELEALKTELEDTLDSTAAQQELR		FALSE	7.37477e-05	0	1	1	7	NP_001104237.1	1	3017.48	0	0.737	0.922256	0	115.1	84.9	4.47717e+06	3.29943e+06		High	High	High	0	1.036e-05	3.77	128.73	Used
	TRUE	High	VSHLLGINVTDFTR		FALSE	7.62648e-05	0	1	1	8	NP_001104237.1	0	1571.85	0	0.709	0.907887	0	117	83	6464533	4.58416e+06		High	High	High	0.0001485	0.0002827	3.42	59.63	Used
	TRUE	High	ELESQISELQEDLESER	1xDeamidated [Q10]	FALSE	9.97535e-05	0	1	1	1	NP_001104237.1	0	2034.93	0								No Quan Values	High	Not Found	High	0	1.341e-05	3.84		Not Used
	TRUE	High	ELESQISELQEDLESER		FALSE	8.89962e-05	0	1	1	1	NP_001104237.1	0	2033.95	0								No Quan Values	High	Not Found	High	0	1.218e-05	3.51		Not Used
	TRUE	High	ELEDATETADAMNR		FALSE	4.03076e-05	0	1	1	2	NP_001104237.1	0	1565.67	0	0.342	0.497082	0	149	51	711419	243278		High	High	High	0	6.138e-06	3.77	21.27	Used
	TRUE	High	ANLQIDQINTDLNLER	1xDeamidated [Q/N]	FALSE	4.4888e-06	0	1	1	9	NP_001104237.1	0	1870.95	0								No Quan Values	High	High	High	0	9.235e-07	3.67		Not Used
	TRUE	High	ALEQQVEEMKTQLEELEDELQATEDAK	1xOxidation [M9]	FALSE	2.92052e-05	0	1	1	4	NP_001104237.1	1	3163.48	0	0.791	0.946499	0	111.7	88.3	1659051	1.31157e+06		High	High	High	0	4.661e-06	4.36	86.41	Used
	TRUE	High	ALEQQVEEMKTQLEELEDELQATEDAK	1xDeamidated [Q]; 1xOxidation [M9]	FALSE	4.40028e-07	0	1	1	13	NP_001104237.1	1	3164.47	0	3.307	0.385267	0	46.4	153.6	240307	794796		High	High	High	0	2.425e-07	6.04	86.62	Used
	TRUE	High	AKQTLENERGELANEVK		FALSE	0.00161576	0	1	1	5	NP_001104237.1	2	1929	0	0.748	0.926594	0	114.4	85.6	6.7774e+06	5.07252e+06		High	High	High	0.0001485	0.0002645	3.2	21.82	Used
	TRUE	High	DFSALESQLQDTQELLQEENR	1xDeamidated [Q]	FALSE	1.5439e-06	0	1	1	9	NP_001104237.1	0	2494.16	0								Not Reliable	High	High	High	0	4.653e-07	5.03		Not Used
	TRUE	High	DFSALESQLQDTQELLQEENRQK		FALSE	0.00070801	0	1	1	3	NP_001104237.1	1	2749.33	0	0.61	0.858605	0	124.3	75.7	1.93213e+06	1.1778e+06		High	High	High	0	7.062e-05	3.32	85.98	Used
	TRUE	High	ALEEAMEQKAELER		FALSE	0.00102399	0	1	1	3	NP_001104237.1	1	1646.81	0	0.782	0.941081	0	112.3	87.7	4.23597e+06	3.31057e+06		High	High	High	0.0001485	0.000774	1.92	30	Used
	TRUE	High	DFSALESQLQDTQELLQEENRQK	1xDeamidated [N/Q]	FALSE	0.00129497	0	1	1	9	NP_001104237.1	1	2750.31	0								No Quan Values	High	High	High	0.0001485	0.0002279	3.68		Not Used
	TRUE	High	ALEEAMEQKAELER	1xOxidation [M6]	FALSE	0.00177479	0	1	1	2	NP_001104237.1	1	1662.8	0	0.439	0.6813	0	139	61	214796	94284.6		High	High	High	0	0.0001456	2.51	17.15	Used
	TRUE	High	DFSALESQLQDTQELLQEENR		FALSE	1.97915e-06	0	1	1	5	NP_001104237.1	0	2493.17	0	0.854	0.971875	0	107.9	92.1	2.82311e+06	2.41135e+06		High	High	High	0	6.787e-07	4.19	90.59	Used
	TRUE	High	ANLQIDQINTDLNLER		FALSE	9.33211e-07	0	1	1	4	NP_001104237.1	0	1869.97	0								No Quan Values	High	High	High	0	3.644e-06	4.6		Not Used
	TRUE	High	AKQTLENERGELANEVK	1xDeamidated [Q3]	FALSE	0.00270748	0.000331607	1	1	1	NP_001104237.1	2	1929.99	0	0.75	0.917227	0	114.3	85.7	315526	236662		High	Peak Found	High	0.0001092	0.0001971	2.43	23.48	Used
	TRUE	High	SMMQDREDQSILCTGESGAGKTENTK	1xCarbamidomethyl [C13]; 1xDeamidated [Q/N]; 2xOxidation [M2; M3]	FALSE	0.00188519	0.000331607	1	1	4	NP_001104237.1	2	2906.24	0	100	9.75497e-17			200		167957		High	High	High	0.0001092	0.0001842	4.12	20.28	Used
	TRUE	High	IMGIPEEEQMGLLR	2xOxidation [M2; M10]	FALSE	0.0021848	0.000331607	1	1	3	NP_001104237.1	0	1647.81	0	1.573	0.877459	0	77.7	122.3	3.26503e+06	5.13647e+06		High	High	High	0.0001485	0.0002789	2.74	41.96	Used
	TRUE	High	IAEFTTNLMEEEEK	1xOxidation [M9]	FALSE	0.00207071	0.000331607	1	1	1	NP_001104237.1	0	1699.77	0								No Quan Values	Not Found	High	High	0.0001092	0.0001627	1.45		Not Used
	TRUE	High	KMEDGVGCLETAEEAK	1xCarbamidomethyl [C8]; 1xOxidation [M2]	FALSE	0.00239977	0.000331607	1	1	4	NP_001104237.1	1	1782.79	0	0.428	0.668064	0	140	60	390127	167082		High	High	High	0.0001092	0.0001811	2.88	22.07	Used
	TRUE	High	KMEDGVGCLETAEEAKR	1xCarbamidomethyl [C8]	FALSE	0.00235199	0.000331607	1	1	1	NP_001104237.1	2	1922.89	0	0.937	0.977963	0	103.3	96.7	352997	330590		High	Peak Found	High	0.0001092	0.0001787	2.9	25.4	Used
	TRUE	High	MEDGVGCLETAEEAK	1xCarbamidomethyl [C7]; 1xOxidation [M1]	FALSE	0.0056567	0.000480221	1	1	2	NP_001104237.1	0	1654.69	0	0.51	0.767154	0	132.5	67.5	340168	173376		High	High	High	0.0001485	0.0003269	3.65	26.51	Used
	TRUE	High	TDLLLEPYNK		FALSE	0.0106764	0.000480221	1	1	2	NP_001104237.1	0	1205.64	0								No Quan Values	High	High	High	0.0001485	0.0005626	2.68		Not Used
	TRUE	High	RKLEGDSTDLNDQIAELQAQIAELK		FALSE	0.00404721	0.000480221	1	1	1	NP_001104237.1	2	2798.45	0								No Quan Values	High	Not Found	High	0.0001485	0.0002591	3.47		Not Used
	TRUE	High	NAEQFKDQADKASTR		FALSE	0.0152033	0.000480221	1	1	1	NP_001104237.1	2	1708.82	0								No Quan Values	High	Not Found	High	0.0001485	0.0008203	2.87		Not Used
	TRUE	High	AGVLAHLEEERDLK		FALSE	0.00378499	0.000480221	1	7	2	NP_001104237.1	1	1579.84	0								No Quan Values	High	High	High	0.000303	0.003407	1.77		Not Used
	TRUE	High	AGVLAHLEEER		FALSE	0.00573294	0.000480221	1	7	2	NP_001104237.1	0	1223.64	0	0.718	0.910794	0	116.4	83.6	2.38465e+06	1.71306e+06		High	High	High	0.0001485	0.0004409	1.94	30.13	Used
	TRUE	High	NKHEAMITDLEER		FALSE	0.0121199	0.000480221	1	1	3	NP_001104237.1	1	1585.76	0	0.445	0.69043	0	138.4	61.6	175067	77945		High	High	High	0.0002602	0.002195	2.31	24.6	Used
	TRUE	High	KTLEEEARTHEAQIQEMR	1xOxidation [M17]	FALSE	0.0032228	0.000480221	1	1	3	NP_001104237.1	2	2215.08	0	0.818	0.964439	0	110	90	593964	486038		High	High	High	0.0002019	0.001048	2.31	25.54	Used
	TRUE	High	LDPHLVLDQLR		FALSE	0.0126992	0.000480221	1	7	3	NP_001104237.1	0	1318.75	0	1.158	0.971875	0	92.7	107.3	2.73369e+06	3.16615e+06		High	High	High	0.0001485	0.0006716	1.96	57.84	Used
	TRUE	High	IAQLEEQLDNETKER		FALSE	0.00833821	0.000480221	1	1	1	NP_001104237.1	1	1815.91	0	0.788	0.94564	0	111.9	88.1	4.16789e+06	3.28373e+06		Peak Found	High	High	0.0001485	0.0004453	2.09	31.89	Used
	TRUE	High	SMMQDREDQSILCTGESGAGK	1xCarbamidomethyl [C13]; 1xOxidation [M]	FALSE	0.00456576	0.000480221	1	1	2	NP_001104237.1	1	2315.99	0								No Quan Values	High	Not Found	High	0.0001485	0.0002813	3.14		Not Used
	TRUE	High	SMMQDREDQSILCTGESGAGKTENTK	1xCarbamidomethyl [C13]; 2xOxidation [M2; M3]	FALSE	0.0128698	0.000480221	1	1	2	NP_001104237.1	2	2905.26	0	0.659	0.877459	0	120.6	79.4	195253	128625		High	Peak Found	High	0.0002602	0.002237	2.51	20.28	Used
	TRUE	High	VIQYLAHVASSHK		FALSE	0.0102572	0.000480221	1	7	3	NP_001104237.1	0	1452.8	0	0.869	0.972372	0	107	93	15113890	13126866		High	High	High	0.000528	0.008082	1.83	27.32	Used
	TRUE	High	HEMPPHIYAITDTAYR	1xOxidation [M3]	FALSE	0.00554424	0.000480221	1	1	1	NP_001104237.1	0	1930.91	0	1.829	0.810993	0	70.7	129.3	1.05486e+06	1.92935e+06		Peak Found	High	High	0.0001485	0.0003232	2.2	34.54	Used
	TRUE	High	KLEGDSTDLNDQIAELQAQIAELK	1xDeamidated [Q/N]	FALSE	0.00940406	0.000480221	1	1	7	NP_001104237.1	1	2643.34	0								No Quan Values	High	High	High	0.0004148	0.005628	3.21		Not Used
	TRUE	High	KLEGDSTDLNDQIAELQAQIAELK		FALSE	0.00532595	0.000480221	1	1	1	NP_001104237.1	1	2642.35	0	0.543	0.807415	0	129.6	70.4	1130807	613637		High	Peak Found	High	0.0001485	0.0003131	2.16	93.54	Used
	TRUE	High	KKAEAQLQELQVK		FALSE	0.00418505	0.000480221	1	1	4	NP_001104237.1	2	1512.87	0	0.584	0.839585	0	126.3	73.7	1.39751e+06	815785		High	High	High	0.0001485	0.0005476	2.85	20.02	Used
	TRUE	High	KAEAQLQELQVK		FALSE	0.00283752	0.000480221	1	1	3	NP_001104237.1	1	1384.78	0	0.379	0.564818	0	145	55	1.41813e+06	537609		High	High	High	0.0001485	0.000203	2.65	24.17	Used
	TRUE	High	IRELESQISELQEDLESER		FALSE	0.00862159	0.000480221	1	1	3	NP_001104237.1	1	2303.14	0	0.877	0.9743	0	106.5	93.5	1.71768e+06	1.50679e+06		High	Peak Found	High	0.0001485	0.0006504	2.59	72.37	Used
	TRUE	High	LQVELDNVMGLLTQSDSK	1xDeamidated [N/Q]	FALSE	0.00283752	0.000480221	1	1	2	NP_001104237.1	0	1991	0								Not Reliable	High	Not Found	High	0.0001485	0.000232	3.26		Not Used
	TRUE	High	TVGQLYKEQLAK		FALSE	0.0033326	0.000480221	1	1	2	NP_001104237.1	1	1377.77	0	0.595	0.850825	0	125.4	74.6	939795	558862		High	High	High	0.0001485	0.0002266	2.25	24.1	Used
	TRUE	High	DKADFCIIHYAGK	1xCarbamidomethyl [C6]	FALSE	0.0139417	0.000480221	1	1	2	NP_001104237.1	1	1537.75	0								No Quan Values	Not Found	High	High	0.008093	0.1036	1.9		Not Used
	TRUE	High	DLEGLGQRYEEK		FALSE	0.00612978	0.000480221	1	1	4	NP_001104237.1	1	1436.7	0	0.553	0.8156	0	128.8	71.2	4887516	2.7027e+06		High	High	High	0.006901	0.08722	2.38	27.6	Used
	TRUE	High	VDYKADEWLMK	1xOxidation [M10]	FALSE	0.00569469	0.000480221	1	7	4	NP_001104237.1	1	1413.67	2	1.697	0.846361	0	74.1	125.9	2044922	3.47101e+06		High	High	High	0.0006972	0.00941	2.53	34.66	Used
	TRUE	High	EQADFALEALAK		FALSE	0.0080641	0.000480221	1	9	10	NP_001104237.1	0	1305.67	0	1.052	0.987785	0	97.4	102.6	2.55075e+06	2.68459e+06		High	High	High	0.0001485	0.0004329	2.61	50.82	Used
	TRUE	High	INFDVNGYIVGANIETYLLEK	1xDeamidated [N13]	FALSE	0.00927924	0.000480221	1	1	1	NP_001104237.1	0	2386.22	0								Not Reliable	High	Not Found	High	0.0001485	0.00049	2.39		Not Used
	TRUE	High	IIGLDQVAGMSETALPGAFK		FALSE	0.00518521	0.000480221	1	1	2	NP_001104237.1	0	2018.06	0								No Quan Values	High	High	High	0.0001485	0.0003072	1.73		Not Used
	TRUE	High	IAEFTTNLMEEEEKSK	1xDeamidated [N7]; 1xOxidation [M9]	FALSE	0.0171389	0.000666919	1	1	1	NP_001104237.1	1	1915.88	0								Not Reliable	High	Not Found	High	0.0002019	0.0009482	2.15		Not Used
	TRUE	High	KFDQLLAEEK		FALSE	0.0171389	0.000666919	1	15	2	NP_001104237.1	1	1220.65	0	0.381	0.595149	0	144.9	55.1	642565	244584		High	High	High	0.0002019	0.0009452	2.88	27.82	Used
	TRUE	High	KMEDGVGCLETAEEAK	1xCarbamidomethyl [C8]	FALSE	0.0186866	0.000666919	1	1	1	NP_001104237.1	1	1766.79	0								No Quan Values	High	Not Found	High	0.0002019	0.001053	2.49		Not Used
	TRUE	High	ASREEILAQAKENEK		FALSE	0.025186	0.000666919	1	1	1	NP_001104237.1	2	1715.89	0	0.516	0.776565	0	132	68	343332	177042		Peak Found	High	High	0.0002019	0.001587	2.56	17.65	Used
	TRUE	High	QRYEILTPNSIPK		FALSE	0.0179558	0.000666919	1	1	1	NP_001104237.1	1	1558.86	0	0.808	0.953518	0	110.6	89.4	1712795	1.38369e+06		High	Peak Found	High	0.0002019	0.001002	2.71	38.75	Used
	TRUE	High	ALELDSNLYR		FALSE	0.0327933	0.000865703	1	1	3	NP_001104237.1	0	1193.62	0	1.259	0.947424	0	88.6	111.4	3.82947e+06	4.81941e+06		High	High	High	0.000303	0.003774	1.85	39.07	Used
	TRUE	High	KANLQIDQINTDLNLER	1xDeamidated [Q/N]	FALSE	0.0501635	0.00101489	1	1	4	NP_001104237.1	1	1999.05	0								No Quan Values	High	Not Found	High	0.000303	0.004989	2.59		Not Used
	TRUE	High	RQAQQERDELADEIANSSGK	1xDeamidated [Q]	FALSE	0.0463969	0.00101489	1	1	4	NP_001104237.1	2	2246.06	0								Not Reliable	High	High	High	0.000303	0.004301	3.59		Not Used
	TRUE	High	RQAQQERDELADEIANSSGK		FALSE	0.0488763	0.00101489	1	1	2	NP_001104237.1	2	2245.08	0	1.104	0.97587	0	95.1	104.9	1.07205e+06	1.18363e+06		High	Peak Found	High	0.000303	0.004735	2.67	28.02	Used
	TRUE	High	FLSNGHVTIPGQQDKDMFQETMEAMR	3xOxidation [M17; M22; M25]	FALSE	0.0498386	0.00101489	1	1	1	NP_001104237.1	1	3058.37	0								No Quan Values	High	Not Found	High	0.000303	0.004915	2.88		Not Used
	TRUE	High	AEAQLQELQVK	1xDeamidated [Q]	FALSE	0.0849103	0.00326873	1	1	2	NP_001104237.1	0	1257.67	0								Not Reliable	High	Not Found	High	0.001527	0.01826	2.6		Not Used
	TRUE	High	QIATLHAQVTDMK	1xOxidation [M12]	FALSE	0.122683	0.00624136	1	1	2	NP_001104237.1	0	1471.76	0	0.367	0.564818	0	146.3	53.7	190507	69932		High	High	High	0.002248	0.02528	1.89	18.17	Used
	TRUE	High	ALEQQVEEMKTQLEELEDELQATEDAK		FALSE	0.128847	0.00640612	1	1	1	NP_001104237.1	1	3147.49	0								No Quan Values	High	Not Found	High	0.002348	0.02728	2.41		Not Used
	TRUE	High	ELEDATETADAMNREVSSLK	1xOxidation [M12]	FALSE	0.12728	0.00640612	1	1	1	NP_001104237.1	1	2225.02	0	0.861	0.970851	0	107.5	92.5	301574	259538		High	Peak Found	High	0.002299	0.02681	2.25	26.45	Used
	TRUE	High	SMMQDREDQSILCTGESGAGK	1xCarbamidomethyl [C13]; 1xDeamidated [Q9]; 1xOxidation [M3]	FALSE	0.137778	0.0068648	1	1	1	NP_001104237.1	1	2316.97	0								Not Reliable	Not Found	High	High	0.002471	0.03071	2		Not Used
	TRUE	High	VRTELADKVTK		FALSE	0.146375	0.0068648	1	1	1	NP_001104237.1	2	1259.73	0	0.444	0.701353	0	138.5	61.5	41461.1	18400.1		High	Peak Found	High	0.002471	0.03382	2.33	13.05	Used
	TRUE	High	RQLEEAEEEAQRANASR		FALSE	0.16306	0.00869234	1	1	1	NP_001104237.1	2	1986.96	0	0.627	0.862055	0	123	77	107794	67538.1		Peak Found	High	High	0.003052	0.04039	1.54	18.82	Used
	TRUE	High	MEDGVGCLETAEEAKR	1xCarbamidomethyl [C7]; 1xOxidation [M1]	FALSE	0.177171	0.00984038	1	1	1	NP_001104237.1	1	1810.79	0	0.627	0.877459	0	122.9	77.1	598274	375235		High	Peak Found	High	0.003635	0.04648	2.07	25.04	Used
	TRUE	High	KMQQNIQELEEQLEEEESAR	1xOxidation [M2]	FALSE	0.177171	0.00984038	1	1	1	NP_001104237.1	1	2477.15	0								No Quan Values	Not Found	High	High	0.003635	0.04637	2.19		Not Used
TRUE	High	Master Protein	XP_536395.3	vinculin [Canis lupus familiaris]	0	FALSE	491.975	61	59	346	59	1	1170	127.2	5.8	708.37	59	0	0.526	0.642827	15.04	120.7	79.3	4.44926e+08	2.92135e+08	High	High
	Checked	Confidence	Sequence	Modifications	Contaminant	Qvality PEP	Qvality q-value	# Protein Groups	# Proteins	# PSMs	Master Protein Accessions	# Missed Cleavages	Theo. MH+ [Da]	# Razor Quan Results	Abundance Ratio: (F4, Sample) / (F3, Control)	Abundance Ratio Adj. P-Value: (F4, Sample) / (F3, Control)	Abundance Ratio Variability [%]: (F4, Sample) / (F3, Control)	Abundances (Grouped): F3, Control	Abundances (Grouped): F4, Sample	Abundance: F3: Control	Abundance: F4: Sample	Quan Info	Found in Sample: [S3] F3: Control	Found in Sample: [S4] F4: Sample	Confidence (by Search Engine): Sequest HT	Percolator q-Value (by Search Engine): Sequest HT	Percolator PEP (by Search Engine): Sequest HT	XCorr (by Search Engine): Sequest HT	Top Apex RT [min]	Quan Usage
	TRUE	High	LLAVAATAPPDAPSR		FALSE	0.00068465	0	1	1	3	XP_536395.3	0	1449.81	0	0.74	0.922256	0	114.9	85.1	5.84205e+06	4.3231e+06		High	High	High	0	0.0001128	2.75	31.64	Used
	TRUE	High	LLAVAATAPPDAPSREEVFDER		FALSE	0.000519975	0	1	1	6	XP_536395.3	1	2354.2	0	0.681	0.89828	0	119	81	3.16e+07	2.15122e+07		High	High	High	0.000303	0.004345	2.63	46.49	Used
	TRUE	High	VDQLTAQLADLAAR		FALSE	9.51749e-05	0	1	1	2	XP_536395.3	0	1484.81	0								No Quan Values	High	High	High	0.0001092	0.0001878	2.75		Not Used
	TRUE	High	VGKETVQTTEDQILKR		FALSE	9.6485e-06	0	1	1	11	XP_536395.3	2	1845.01	0	0.7	0.902642	0	117.6	82.4	4.7739e+07	3.34341e+07		High	High	High	0	2.485e-05	3.66	29.54	Used
	TRUE	High	VAMANIQPQMLVAGATSIAR	2xOxidation [M3; M10]	FALSE	7.47954e-08	0	1	1	5	XP_536395.3	0	2074.08	0	0.938	0.985256	0	103.2	96.8	8.56846e+06	8.03551e+06		High	High	High	0	2.705e-08	3.71	57.52	Used
	TRUE	High	VAMANIQPQMLVAGATSIAR	1xDeamidated [N/Q]; 1xOxidation [M]	FALSE	3.95132e-06	0	1	1	10	XP_536395.3	0	2059.07	0								No Quan Values	High	High	High	0.001025	0.01143	3.4		Not Used
	TRUE	High	VAMANIQPQMLVAGATSIAR	1xOxidation [M3]	FALSE	4.80045e-06	0	1	1	4	XP_536395.3	0	2058.08	0	0.646	0.880668	0	121.5	78.5	2.02974e+06	1.31175e+06		High	High	High	0	1.76e-05	3.17	66.91	Used
	TRUE	High	VAMANIQPQMLVAGATSIAR	2xDeamidated [Q7; Q9]; 2xOxidation [M3; M10]	FALSE	0.000122006	0	1	1	1	XP_536395.3	0	2076.05	0								No Quan Values	High	Not Found	High	0	1.597e-05	2.68		Not Used
	TRUE	High	GWLRDPSASPGDAGEQAIR		FALSE	0.000349962	0	1	1	4	XP_536395.3	1	1982.97	0	1.056	0.987784	0	97.3	102.7	1.17068e+07	12364332		High	High	High	0.0001485	0.0003444	2.97	35.02	Used
	TRUE	High	VLQLTSWDEDAWASK	1xDeamidated [Q3]	FALSE	0.000777742	0	1	1	1	XP_536395.3	0	1749.83	0								Not Reliable	High	Not Found	High	0	7.59e-05	3.72		Not Used
	TRUE	High	VLQLTSWDEDAWASK		FALSE	0.000680071	0	1	1	3	XP_536395.3	0	1748.85	0								No Quan Values	High	High	High	0	6.829e-05	3.43		Not Used
	TRUE	High	LANVMMGPYR	1xOxidation [M5]	FALSE	0.000221724	0	1	1	1	XP_536395.3	0	1167.56	0								No Quan Values	High	Not Found	High	0	2.664e-05	2.76		Not Used
	TRUE	High	KIDAAQNWLADPNGGPEGEEQIR	1xDeamidated [N13]	FALSE	6.85151e-06	0	1	1	1	XP_536395.3	1	2509.2	0								Not Reliable	High	Not Found	High	0	1.332e-06	4.32		Not Used
	TRUE	High	KIDAAQNWLADPNGGPEGEEQIR		FALSE	8.9018e-06	0	1	1	1	XP_536395.3	1	2508.21	0								No Quan Values	High	Not Found	High	0	1.676e-06	4.18		Not Used
	TRUE	High	TIESILEPVAQQISHLVIMHEEGEVDGK	1xDeamidated [Q]	FALSE	6.896e-05	0	1	1	5	XP_536395.3	0	3102.57	0								Not Reliable	High	High	High	0.000303	0.002693	3.21		Not Used
	TRUE	High	QVATALQNLQTK		FALSE	0.00129497	0	1	1	3	XP_536395.3	0	1314.74	0	0.264	0.283721	0	158.2	41.8	7.48812e+06	1.97951e+06		High	High	High	0.0001485	0.0002574	2.28	28.45	Used
	TRUE	High	SLLDASEEAIKK		FALSE	0.000502817	0	1	1	2	XP_536395.3	1	1303.71	0	0.704	0.905761	0	117.4	82.6	31418002	22110408		High	High	High	0	7.668e-05	2.45	32.16	Used
	TRUE	High	LVQAAQMLQSDPYSVPARDYLIDGSR	1xDeamidated [Q9]; 1xOxidation [M7]	FALSE	0.00178673	0	1	1	3	XP_536395.3	1	2910.43	0								Not Reliable	High	High	High	0	0.0001485	3.95		Not Used
	TRUE	High	MIDERQQELTHQEHR		FALSE	0.000586734	0	1	1	1	XP_536395.3	1	1949.92	0	0.01	9.75497e-17		200		79278.2			High	Not Found	High	0	6.023e-05	2.54	13.56	Used
	TRUE	High	MLGQMTDQVAELR	1xOxidation [M]	FALSE	0.000190007	0	1	1	4	XP_536395.3	0	1507.72	0	0.742	0.922256	0	114.8	85.2	6.71093e+06	4977998		High	High	High	0	2.335e-05	2.66	31.62	Used
	TRUE	High	MLGQMTDQVAELR	2xOxidation [M1; M5]	FALSE	8.04915e-06	0	1	1	8	XP_536395.3	0	1523.72	0	0.522	0.78209	0	131.4	68.6	1.65382e+07	8.63593e+06		High	High	High	0	2.081e-05	3.3	26.99	Used
	TRUE	High	MLGQMTDQVAELR	1xDeamidated [Q]; 2xOxidation [M1; M5]	FALSE	2.46935e-05	0	1	1	3	XP_536395.3	0	1524.7	0	0.406	0.623957	0	142.2	57.8	1.23225e+06	500527		High	High	High	0	1.888e-05	2.9	28.24	Used
	TRUE	High	LVQAAQMLQSDPYSVPARDYLIDGSR	1xOxidation [M7]	FALSE	0.000230836	0	1	1	3	XP_536395.3	1	2909.45	0	0.684	0.89828	0	118.8	81.2	6.12994e+06	4.19087e+06		High	High	High	0	2.751e-05	3.7	58.39	Used
	TRUE	High	LVQAAQMLQSDPYSVPAR	1xOxidation [M7]	FALSE	7.83591e-06	0	1	1	8	XP_536395.3	0	1990.01	0	0.973	0.99208	0	101.4	98.6	15475760	15058151		High	High	High	0	1.493e-06	3.5	37.07	Used
	TRUE	High	LVQAAQMLQSDPYSVPARDYLIDGSR	1xDeamidated [Q9]	FALSE	0.00171627	0	1	1	1	XP_536395.3	1	2894.44	0								Not Reliable	High	Not Found	High	0	0.0001416	4.24		Not Used
	TRUE	High	LVQAAQMLQSDPYSVPAR	1xDeamidated [Q]	FALSE	0.00162663	0	1	1	4	XP_536395.3	0	1975	0								Not Reliable	High	High	High	0	0.000136	3.64		Not Used
	TRUE	High	NPGNQAAYEHFETMK		FALSE	0.000347621	0	1	1	2	XP_536395.3	0	1736.77	0	0.655	0.885998	0	120.8	79.2	1837341	1.20398e+06		High	Peak Found	High	0	3.884e-05	3.28	30.44	Used
	TRUE	High	MSAEINEIIR		FALSE	0.000255285	0	1	1	2	XP_536395.3	0	1175.61	0	0.674	0.89828	0	119.5	80.5	3.02719e+06	2.03885e+06		High	High	High	0	2.991e-05	2.45	40.62	Used
	TRUE	High	MSAEINEIIR	1xOxidation [M1]	FALSE	0.000602696	0	1	1	3	XP_536395.3	0	1191.6	0	0.695	0.901989	0	118	82	5.69146e+06	3953317		High	High	High	0	6.16e-05	2.72	32.77	Used
	TRUE	High	MTGLVDEAIDTK		FALSE	8.78095e-05	0	1	1	2	XP_536395.3	0	1292.64	0	0.751	0.926633	0	114.2	85.8	6436744	4.83346e+06		High	High	High	0	1.203e-05	3.04	35.06	Used
	TRUE	High	MQEAMTQEVSDVFSDTTTPIK	1xOxidation [M]	FALSE	0.000115627	0	1	1	5	XP_536395.3	0	2374.08	0								No Quan Values	High	High	High	0	7.998e-05	3.27		Not Used
	TRUE	High	MQEAMTQEVSDVFSDTTTPIK	1xDeamidated [Q7]; 1xOxidation [M]	FALSE	3.79534e-06	0	1	1	3	XP_536395.3	0	2375.06	0								No Quan Values	High	High	High	0	8.006e-07	4.23		Not Used
	TRUE	High	MQEAMTQEVSDVFSDTTTPIK	2xOxidation [M1; M5]	FALSE	2.35705e-07	0	1	1	5	XP_536395.3	0	2390.07	0	1.049	0.988634	0	97.6	102.4	3.22833e+06	3387162		High	High	High	0	7.279e-08	4.29	49.8	Used
	TRUE	High	MQEAMTQEVSDVFSDTTTPIK	1xDeamidated [Q]; 2xOxidation [M1; M5]	FALSE	3.89863e-06	0	1	1	6	XP_536395.3	0	2391.06	0								Not Reliable	High	High	High	0	8.196e-07	3.92		Not Used
	TRUE	High	MTGLVDEAIDTK	1xOxidation [M1]	FALSE	4.51798e-05	0	1	1	3	XP_536395.3	0	1308.64	0	0.526	0.787106	0	131.1	68.9	15876813	8350507		High	High	High	0	6.798e-06	3.11	28.99	Used
	TRUE	High	TNISDEESEQATEMLVHNAQNLMQSVK	1xDeamidated [Q/N]; 2xOxidation [M14; M23]	FALSE	0.00125226	0	1	1	10	XP_536395.3	0	3079.38	0								No Quan Values	High	High	High	0.0002019	0.001352	3.05		Not Used
	TRUE	High	TNISDEESEQATEMLVHNAQNLMQSVK	2xOxidation [M14; M23]	FALSE	0.000169518	0	1	1	5	XP_536395.3	0	3078.4	0	0.766	0.934283	0	113.2	86.8	2.98748e+06	2288738		High	High	High	0	2.114e-05	3.21	67.64	Used
	TRUE	High	STVEGIQASVK		FALSE	0.000747053	0	1	1	1	XP_536395.3	0	1118.61	0	0.405	0.645942	0	142.4	57.6	618644	250252		High	Peak Found	High	0	7.351e-05	2.61	19.09	Used
	TRUE	High	AQQVSQGLDVLTAK		FALSE	9.32776e-05	0	1	1	7	XP_536395.3	0	1457.8	0	0.892	0.9743	0	105.7	94.3	2.31274e+07	2.06217e+07		High	High	High	0	4.237e-05	3.13	36.77	Used
	TRUE	High	AQQVSQGLDVLTAK	1xDeamidated [Q]	FALSE	0.000117979	0	1	1	6	XP_536395.3	0	1458.78	0	0.896	0.9743	0	105.5	94.5	2.6459e+06	2370262		High	High	High	0	3.903e-05	3.38	38.67	Used
	TRUE	High	ETVQTTEDQILK		FALSE	0.000131355	0	1	1	2	XP_536395.3	0	1404.72	0	0.431	0.662096	0	139.8	60.2	2793022	1.20318e+06		High	High	High	0	1.698e-05	3.13	28.01	Used
	TRUE	High	AAVHLEGKIEQAQR		FALSE	3.29634e-06	0	1	1	4	XP_536395.3	1	1549.84	0	0.498	0.753639	0	133.5	66.5	7.79943e+06	3.8837e+06		High	High	High	0	7.092e-07	3.84	17.28	Used
	TRUE	High	AAVHLEGKIEQAQR	1xDeamidated [Q]	FALSE	2.95999e-05	0	1	1	4	XP_536395.3	1	1550.83	0	0.595	0.850825	0	125.4	74.6	850309	505981		High	Peak Found	High	0	4.708e-06	3.86	18.41	Used
	TRUE	High	EAFQPQEPDFPPPPPDLEQLR	1xDeamidated [Q]	FALSE	0.000273007	0	1	1	14	XP_536395.3	0	2448.17	0	0.45	0.69043	0	137.9	62.1	3.00566e+06	1.35216e+06		High	High	High	0.0004718	0.007442	3.15	72.62	Used
	TRUE	High	EAFQPQEPDFPPPPPDLEQLR		FALSE	3.12329e-05	0	1	1	12	XP_536395.3	0	2447.19	0	0.451	0.690902	0	137.8	62.2	3.58315e+06	1.61698e+06		High	High	High	0	7.539e-06	3.53	71.55	Used
	TRUE	High	CDRVDQLTAQLADLAAR	1xCarbamidomethyl [C1]	FALSE	0.00164859	0	1	1	5	XP_536395.3	1	1915.97	0	0.486	0.737591	0	134.6	65.4	1.30801e+06	635597		High	High	High	0.0001485	0.0002341	2.86	72.21	Used
	TRUE	High	ELTPQVVSAAR		FALSE	0.00135722	0	1	1	3	XP_536395.3	0	1170.65	0	0.189	0.117934	0	168.2	31.8	10992422	2.07957e+06		High	High	High	0.0001485	0.0005229	1.59	25.08	Used
	TRUE	High	AVAGNISDPGLQK		FALSE	0.00131246	0	1	1	2	XP_536395.3	0	1269.68	0	0.189	0.116684	0	168.3	31.7	1.96048e+06	369643		High	High	High	0	0.0001154	1.99	19.89	Used
	TRUE	High	AVANSRPAKAAVHLEGKIEQAQR		FALSE	0.000752083	0	1	1	1	XP_536395.3	2	2444.35	0	0.753	0.922256	0	114.1	85.9	367143	276304		High	Peak Found	High	0	7.389e-05	2.72	23.3	Used
	TRUE	High	ALASQLQDSLKDLK		FALSE	0.000274846	0	1	1	4	XP_536395.3	1	1529.85	0	0.722	0.913511	0	116.1	83.9	17217631	1.24299e+07		High	High	High	0	3.188e-05	2.74	50.97	Used
	TRUE	High	GILSGTSDLLLTFDEAEVRK		FALSE	1.70782e-07	0	1	1	4	XP_536395.3	1	2164.15	0	0.492	0.746975	0	134.1	65.9	4740412	2.33202e+06		High	High	High	0	5.507e-08	3.86	88.62	Used
	TRUE	High	GILSGTSDLLLTFDEAEVR		FALSE	1.1963e-06	0	1	1	5	XP_536395.3	0	2036.05	0	0.637	0.877459	0	122.2	77.8	1943342	1.23811e+06		High	High	High	0	2.953e-07	4.39	96.24	Used
	TRUE	High	GILEYLTVAEVVETMEDLVTYTK	1xOxidation [M15]	FALSE	4.76834e-06	0	1	1	6	XP_536395.3	0	2632.33	0	0.506	0.758536	0	132.8	67.2	2093045	1.05837e+06		High	High	High	0	7.62e-06	3.79	122.89	Used
	TRUE	High	AGEVINQPMMMAAR	1xOxidation [M]	FALSE	0.000951149	0	1	1	3	XP_536395.3	0	1534.72	0								No Quan Values	High	High	High	0	8.963e-05	3.72		Not Used
	TRUE	High	VREAFQPQEPDFPPPPPDLEQLR		FALSE	0.000631682	0	1	1	5	XP_536395.3	1	2702.36	0	0.188	0.115487	0	168.4	31.6	5.17296e+06	971054		High	High	High	0.0001092	0.0001676	3.2	67.21	Used
	TRUE	High	AIPDLTAPVAAVQAAVSNLVR		FALSE	2.50439e-08	0	1	1	12	XP_536395.3	0	2076.18	0	0.498	0.753639	0	133.5	66.5	25005938	1.24548e+07		High	High	High	0	1.052e-08	4.62	116.41	Used
	TRUE	High	TIESILEPVAQQISHLVIMHEEGEVDGK	1xOxidation [M19]	FALSE	0.00260076	0.000331607	1	1	6	XP_536395.3	0	3117.58	0	0.482	0.737591	0	134.9	65.1	1.5721e+07	7.5801e+06		High	High	High	0.0001485	0.0008683	2.7	116.8	Used
	TRUE	High	TIESILEPVAQQISHLVIMHEEGEVDGK		FALSE	0.00194946	0.000331607	1	1	3	XP_536395.3	0	3101.58	0	0.57	0.829883	0	127.4	72.6	1.95778e+06	1.11592e+06		High	High	High	0.0001485	0.0003731	2.3	122.14	Used
	TRUE	High	WIDNPTVDDR		FALSE	0.00254899	0.000331607	1	1	2	XP_536395.3	0	1230.57	0	0.163	0.0721639	0	172	28	1.76032e+06	287000		High	High	High	0.0001092	0.0001891	2.6	26.03	Used
	TRUE	High	MLGQMTDQVAELR		FALSE	0.00221429	0.000331607	1	1	1	XP_536395.3	0	1491.73	0								No Quan Values	High	Not Found	High	0.0001092	0.0001713	3.75		Not Used
	TRUE	High	QILDEAGKVGELCAGK	1xCarbamidomethyl [C13]	FALSE	0.00236781	0.000331607	1	1	3	XP_536395.3	1	1687.87	0	0.979	0.993516	0	101.1	98.9	8.80753e+06	8.61901e+06		High	High	High	0.006627	0.08483	2.35	35.5	Used
	TRUE	High	MIDERQQELTHQEHR	1xOxidation [M1]	FALSE	0.0122827	0.000480221	1	1	1	XP_536395.3	1	1965.92	0	0.01	9.75497e-17		200		40869.8			High	Not Found	High	0.0001485	0.0006454	2.86	12.62	Used
	TRUE	High	QVATALQNLQTK	1xDeamidated [Q/N]	FALSE	0.0101211	0.000480221	1	1	3	XP_536395.3	0	1315.72	0	0.333	0.458	0	150	50	1.54157e+06	513432		High	Peak Found	High	0.0002019	0.001065	2.38	30.86	Used
	TRUE	High	TIESILEPVAQQISHLVIMHEEGEVDGK	1xDeamidated [Q]; 1xOxidation [M19]	FALSE	0.00424149	0.000480221	1	1	4	XP_536395.3	0	3118.56	0								Not Reliable	High	High	High	0.0001485	0.0005619	2.56		Not Used
	TRUE	High	NPGNQAAYEHFETMK	1xOxidation [M14]	FALSE	0.00320128	0.000480221	1	1	3	XP_536395.3	0	1752.76	0	0.435	0.668568	0	139.4	60.6	3.54327e+06	1.54009e+06		High	High	High	0.0001485	0.0002208	2.29	23.22	Used
	TRUE	High	VREAFQPQEPDFPPPPPDLEQLR	1xDeamidated [Q]	FALSE	0.00569469	0.000480221	1	1	6	XP_536395.3	1	2703.34	0								No Quan Values	High	High	High	0.0001485	0.0004117	3.59		Not Used
	TRUE	High	VGKETVQTTEDQILK		FALSE	0.00673178	0.000480221	1	1	2	XP_536395.3	1	1688.91	0	0.842	0.971875	0	108.6	91.4	6.56207e+06	5.52823e+06		High	Peak Found	High	0.0001485	0.0003743	2.81	28.98	Used
	TRUE	High	AAAVGTANKSTVEGIQASVK	1xDeamidated [Q/N]	FALSE	0.0099203	0.000480221	1	1	2	XP_536395.3	1	1903.01	0	0.902	0.977109	0	105.1	94.9	509701	459925		High	High	High	0.0001485	0.0005222	2.64	28.85	Used
	TRUE	High	GWLRDPSASPGDAGEQAIR	1xDeamidated [Q16]	FALSE	0.0112621	0.000480221	1	1	1	XP_536395.3	1	1983.95	0								Not Reliable	High	Not Found	High	0.0001485	0.0005902	2.82		Not Used
	TRUE	High	SLGEISALTSK		FALSE	0.00373462	0.000480221	1	1	2	XP_536395.3	0	1105.61	0	0.71	0.907887	0	117	83	6584393	4674124		High	High	High	0.0001485	0.0002447	1.71	35.68	Used
	TRUE	High	AGEVINQPMMMAAR	3xOxidation [M9; M10; M11]	FALSE	0.01082	0.000480221	1	1	1	XP_536395.3	0	1566.71	0								No Quan Values	High	Not Found	High	0.0001485	0.0005704	2.4		Not Used
	TRUE	High	LVQAAQMLQSDPYSVPAR	1xDeamidated [Q9]; 1xOxidation [M7]	FALSE	0.00785128	0.000480221	1	1	3	XP_536395.3	0	1990.99	0								No Quan Values	High	High	High	0.0001485	0.0004251	3.85		Not Used
	TRUE	High	AGEVINQPMMMAAR	2xOxidation [M10; M]	FALSE	0.00356353	0.000480221	1	1	3	XP_536395.3	0	1550.71	0	0.084	0.00765377	0	184.6	15.4	415718	34712.9		High	High	High	0.0001485	0.0002376	3.18	20.41	Used
	TRUE	High	MALLMAEMSR	2xOxidation [M5; M8]	FALSE	0.0112621	0.000480221	1	1	1	XP_536395.3	0	1184.55	0								No Quan Values	High	Not Found	High	0.0001485	0.0005923	2.17		Not Used
	TRUE	High	VAMANIQPQMLVAGATSIAR	1xDeamidated [Q/N]; 2xOxidation [M3; M10]	FALSE	0.00790395	0.000480221	1	1	2	XP_536395.3	0	2075.06	0								No Quan Values	Not Found	High	High	0.0001485	0.0004263	1.87		Not Used
	TRUE	High	ETVQTTEDQILKR		FALSE	0.0122827	0.000480221	1	1	2	XP_536395.3	1	1560.82	0	0.468	0.722323	0	136.2	63.8	7182002	3.36474e+06		High	High	High	0.0004718	0.00762	2.37	27.73	Used
	TRUE	High	ELLPVLISAMK	1xOxidation [M10]	FALSE	0.00421317	0.000480221	1	1	6	XP_536395.3	0	1229.72	0	0.763	0.933592	0	113.4	86.6	6.83393e+06	5.21754e+06		High	High	High	0.0001485	0.0005152	2.28	60.57	Used
	TRUE	High	SFLDSGYR		FALSE	0.024528	0.000666919	1	1	1	XP_536395.3	0	944.447	0	0.216	0.169639	0	164.5	35.5	2672843	576493		High	Peak Found	High	0.0002019	0.001535	2.4	28.3	Used
	TRUE	High	LADELAPPKPPLPEGEVPPPRPPPPEEKDEEFPEQK	1xDeamidated [Q35]	FALSE	0.0177186	0.000666919	1	1	4	XP_536395.3	1	3997.01	0	0.485	0.737591	0	134.7	65.3	7806174	3.78636e+06		High	High	High	0.0002019	0.0009877	3.92	51.45	Used
	TRUE	High	NQGIEEALKNR		FALSE	0.022956	0.000666919	1	1	1	XP_536395.3	1	1271.67	0	0.223	0.249925	0	163.6	36.4	148941	33164.4		High	Peak Found	High	0.0002019	0.001387	2.1	21.74	Used
	TRUE	High	ALASIDSKLNQAK		FALSE	0.0174844	0.000666919	1	1	2	XP_536395.3	1	1358.76	0	0.381	0.566813	0	144.9	55.1	1.04033e+06	396001		High	High	High	0.0002019	0.0009692	2.14	22.81	Used
	TRUE	High	ALASQLQDSLK		FALSE	0.020508	0.000666919	1	1	3	XP_536395.3	0	1173.65	0	0.771	0.936187	0	113	87	13860455	10680692		High	High	High	0.0004718	0.007604	2.44	32.73	Used
	TRUE	High	LVQAAQMLQSDPYSVPAR		FALSE	0.0184398	0.000666919	1	1	2	XP_536395.3	0	1974.01	0	0.629	0.876904	0	122.8	77.2	1.01979e+06	641562		High	High	High	0.0002019	0.001034	2.19	51.16	Used
	TRUE	High	CDRVDQLTAQLADLAAR	1xCarbamidomethyl [C1]; 1xDeamidated [Q]	FALSE	0.0267304	0.000666919	1	1	4	XP_536395.3	1	1916.95	0								Not Reliable	High	Not Found	High	0.0004148	0.007153	3.05		Not Used
	TRUE	High	DMPPAFIKVENACTK	1xCarbamidomethyl [C13]; 1xOxidation [M2]	FALSE	0.0309067	0.000865703	1	1	1	XP_536395.3	1	1736.83	0	0.739	0.922256	0	115	85	1.0263e+06	758576		High	Peak Found	High	0.0002602	0.002179	1.55	34.73	Used
	TRUE	High	TNISDEESEQATEMLVHNAQNLMQSVK	1xDeamidated [Q/N]; 1xOxidation [M]	FALSE	0.0467	0.00101489	1	1	6	XP_536395.3	0	3063.39	0								No Quan Values	High	Not Found	High	0.004798	0.06247	3.47		Not Used
	TRUE	High	ALASIDSKLNQAK	1xDeamidated [N10]	FALSE	0.0531803	0.00101489	1	1	2	XP_536395.3	1	1359.75	0	0.181	0.138215	0	169.4	30.6	244610	44264.5		High	Peak Found	High	0.000303	0.005584	2.43	23.94	Used
	TRUE	High	VMLVNSMNTVK	1xOxidation [M]	FALSE	0.0605204	0.00139497	1	1	2	XP_536395.3	0	1251.64	0	0.219	0.220142	0	164	36	666265	146093		High	Peak Found	High	0.008003	0.1026	2.22	26.62	Used
	TRUE	High	AIPDLTAPVAAVQAAVSNLVR	1xDeamidated [Q13]	FALSE	0.0597449	0.00139497	1	1	1	XP_536395.3	0	2077.17	0								No Quan Values	High	Not Found	High	0.0004148	0.0069	2.12		Not Used
	TRUE	High	SLLDASEEAIK		FALSE	0.0786895	0.00309549	1	1	1	XP_536395.3	0	1175.62	0								No Quan Values	Not Found	High	High	0.001025	0.01145	1.89		Not Used
	TRUE	High	DPSASPGDAGEQAIR		FALSE	0.0838426	0.00326873	1	1	1	XP_536395.3	0	1470.68	0								No Quan Values	High	Not Found	High	0.001074	0.01284	2.38		Not Used
	TRUE	High	ELTPQVVSAAR	1xDeamidated [Q5]	FALSE	0.0827874	0.00326873	1	1	1	XP_536395.3	0	1171.63	0	0.204	0.155371	0	166.1	33.9	813157	165783		High	Peak Found	High	0.001074	0.01252	1.74	26.95	Used
	TRUE	High	VMLVNSMNTVK	2xOxidation [M2; M7]	FALSE	0.109782	0.00447225	1	1	2	XP_536395.3	0	1267.64	0	0.401	0.642977	0	142.7	57.3	107095	42986.2		High	High	High	0.006124	0.07996	1.49	17.59	Used
	TRUE	High	NPGNQAAYEHFETMKNQWIDNVEK	1xOxidation [M14]	FALSE	0.114644	0.00482747	1	1	1	XP_536395.3	1	2879.31	0								No Quan Values	High	Not Found	High	0.001789	0.02229	2.99		Not Used
	TRUE	High	IAELCDDPKERDDILR	1xCarbamidomethyl [C5]	FALSE	0.116788	0.00537309	1	1	1	XP_536395.3	2	1957.96	0	0.429	0.68286	0	139.9	60.1	475663	204233		High	Peak Found	High	0.001947	0.02319	1.84	30.88	Used
	TRUE	High	ALASQLQDSLK	1xDeamidated [Q5]	FALSE	0.120441	0.00590393	1	1	1	XP_536395.3	0	1174.63	0								No Quan Values	Not Found	High	High	0.002154	0.02447	2.01		Not Used
	TRUE	High	NQWIDNVEK		FALSE	0.119702	0.00590393	1	1	1	XP_536395.3	0	1145.56	0	0.289	0.349226	0	155.1	44.9	2.02616e+06	586411		Peak Found	High	High	0.002102	0.02425	1.66	28.46	Used
	TRUE	High	NPGNQAAYEHFETMKNQWIDNVEK	1xDeamidated [N/Q]; 1xOxidation [M14]	FALSE	0.147261	0.00703674	1	1	3	XP_536395.3	1	2880.29	0								No Quan Values	High	Not Found	High	0.002664	0.03661	2.78		Not Used
	TRUE	High	LADELAPPKPPLPEGEVPPPRPPPPEEKDEEFPEQK		FALSE	0.167983	0.00885001	1	1	1	XP_536395.3	1	3996.03	0	100	9.75497e-17			200		2991774		Not Found	High	High	0.003198	0.04261	2.82	51.33	Used
	TRUE	High	QILDEAGKVGELCAGKER	1xCarbamidomethyl [C13]	FALSE	0.173035	0.00953487	1	1	1	XP_536395.3	2	1973.01	0	0.779	0.940681	0	112.5	87.5	1.47309e+06	1.14684e+06		Peak Found	High	High	0.003597	0.04467	1.4	33.32	Used
	TRUE	High	TNLLQVCER	1xCarbamidomethyl [C7]	FALSE	0.176129	0.00984038	1	1	2	XP_536395.3	0	1132.58	0	0.267	0.291602	0	157.8	42.2	3.21641e+06	859297		High	High	High	0.008003	0.1015	1.82	28.93	Used
TRUE	High	Master Protein	XP_866874.1	alpha-actinin-1 isoform X4 [Canis lupus familiaris]	0	FALSE	413.131	72	54	256	37	1	892	102.9	5.41	567.24	54	18	0.527	0.642827	8.04	120.8	79.2	2.97874e+08	1.95173e+08	High	High
	Checked	Confidence	Sequence	Modifications	Contaminant	Qvality PEP	Qvality q-value	# Protein Groups	# Proteins	# PSMs	Master Protein Accessions	# Missed Cleavages	Theo. MH+ [Da]	# Razor Quan Results	Abundance Ratio: (F4, Sample) / (F3, Control)	Abundance Ratio Adj. P-Value: (F4, Sample) / (F3, Control)	Abundance Ratio Variability [%]: (F4, Sample) / (F3, Control)	Abundances (Grouped): F3, Control	Abundances (Grouped): F4, Sample	Abundance: F3: Control	Abundance: F4: Sample	Quan Info	Found in Sample: [S3] F3: Control	Found in Sample: [S4] F4: Sample	Confidence (by Search Engine): Sequest HT	Percolator q-Value (by Search Engine): Sequest HT	Percolator PEP (by Search Engine): Sequest HT	XCorr (by Search Engine): Sequest HT	Top Apex RT [min]	Quan Usage
	TRUE	High	VEQIAAIAQELNELDYYDSPSVNAR		FALSE	0.000312227	0	1	5	2	XP_866874.1	0	2808.37	0	0.496	0.752022	0	133.7	66.3	852150	422929		High	Peak Found	High	0	3.547e-05	3.21	94.55	Used
	TRUE	High	VEQIAAIAQELNELDYYDSPSVNAR	1xDeamidated [Q3]	FALSE	0.000101102	0	1	5	2	XP_866874.1	0	2809.35	0								No Quan Values	High	High	High	0	1.358e-05	4.9		Not Used
	TRUE	High	LLETIDQLYLEYAK		FALSE	1.19604e-05	0	1	5	6	XP_866874.1	0	1711.92	0	0.528	0.790059	0	130.9	69.1	8.67566e+06	4584396		High	High	High	0	9.212e-06	3.56	88.91	Used
	TRUE	High	IDQLEGDHQLIQEALIFDNK		FALSE	2.8623e-05	0	1	5	3	XP_866874.1	0	2339.19	0	0.484	0.737591	0	134.8	65.2	2.29691e+06	1.11076e+06		High	High	High	0	4.568e-06	3.81	77.38	Used
	TRUE	High	IDQLEGDHQLIQEALIFDNK	1xDeamidated [Q]	FALSE	8.9018e-06	0	1	5	7	XP_866874.1	0	2340.17	0								No Quan Values	High	High	High	0	1.676e-06	4.35		Not Used
	TRUE	High	IDQLEGDHQLIQEALIFDNKHTNYTMEHIR	1xDeamidated [N/Q]; 1xOxidation [M26]	FALSE	0.000288066	0	1	5	6	XP_866874.1	1	3638.75	0								No Quan Values	High	High	High	0	8.419e-05	3.8		Not Used
	TRUE	High	ICDQWDNLGALTQK	1xCarbamidomethyl [C2]	FALSE	1.03879e-05	0	1	5	3	XP_866874.1	0	1661.8	0	0.301	0.37944	0	153.7	46.3	3.44853e+06	1.03853e+06		High	High	High	0	3.092e-06	3.71	54.9	Used
	TRUE	High	LLETIDQLYLEYAKR		FALSE	2.34024e-05	0	1	5	3	XP_866874.1	1	1868.02	0	0.488	0.73767	0	134.4	65.6	2.85779e+06	1.394e+06		High	High	High	0	3.851e-06	3.28	83.68	Used
	TRUE	High	LLETIDQLYLEYAKR	1xDeamidated [Q7]	FALSE	0.000457727	0	1	5	2	XP_866874.1	1	1869	0								Not Reliable	High	High	High	0	4.908e-05	2.92		Not Used
	TRUE	High	LMLLLEVISGER	1xOxidation [M2]	FALSE	0.000237117	0	3	15	5	XP_866874.1; XP_536333.2; XP_541640.2	0	1388.78	0	0.505	0.758432	0	132.9	67.1	3.53285e+06	1.78268e+06	Shared	High	High	High	0	3.793e-05	2.78	85	Used
	TRUE	High	HRPELIDYGK		FALSE	0.000648867	0	1	5	9	XP_866874.1	0	1227.65	0	0.333	0.458	0	150	50	5.81011e+06	1.93517e+06		High	High	High	0.001579	0.02084	2.51	19	Used
	TRUE	High	KDDPLTNLNTAFDVAEK		FALSE	3.25164e-05	0	1	5	6	XP_866874.1	1	1890.94	0	0.547	0.810993	0	129.3	70.7	3.05586e+06	1.67127e+06		High	High	High	0	5.115e-06	3.25	57.47	Used
	TRUE	High	KDDPLTNLNTAFDVAEKYLDIPK	1xDeamidated [N7]	FALSE	0.00156248	0	1	5	1	XP_866874.1	2	2621.33	0								Not Reliable	High	Not Found	High	0	0.0001319	4.06		Not Used
	TRUE	High	HEAFESDLAAHQDRVEQIAAIAQELNELDYYDSPSVNAR	1xDeamidated [Q]	FALSE	0.000374255	0	1	5	2	XP_866874.1	1	4416.07	0								No Quan Values	High	Not Found	High	0	4.132e-05	4.07		Not Used
	TRUE	High	VGWEQLLTTIAR		FALSE	6.0703e-05	0	2	10	5	XP_866874.1; XP_541640.2	0	1386.77	0	0.574	0.834127	0	127.1	72.9	15642006	8979298	Shared	High	High	High	0	8.758e-06	3.61	95.16	Used
	TRUE	High	LAILGIHNEVSK		FALSE	5.23694e-05	0	1	5	5	XP_866874.1	0	1293.75	0	0.924	0.978327	0	103.9	96.1	31159083	28800619		High	High	High	0	7.685e-06	2.92	36.17	Used
	TRUE	High	KTFTAWCNSHLR	1xCarbamidomethyl [C7]	FALSE	0.000184974	0	3	12	2	XP_866874.1; XP_536333.2; XP_541640.2	1	1520.74	0	0.467	0.718515	0	136.3	63.7	4252949	1.9855e+06	Shared	High	High	High	0.0001485	0.0002605	2.5	26.89	Used
	TRUE	High	KHEAFESDLAAHQDR		FALSE	0.000635935	0	3	12	3	XP_866874.1; XP_536333.2; XP_541640.2	1	1753.83	0	0.365	0.564997	0	146.5	53.5	646228	235961	Shared	High	High	High	0	6.436e-05	2.46	15.89	Used
	TRUE	High	KHEAFESDLAAHQDRVEQIAAIAQELNELDYYDSPSVNAR		FALSE	8.1014e-05	0	1	5	2	XP_866874.1	2	4543.18	0	0.718	0.910794	0	116.4	83.6	4.51186e+06	3.24036e+06		High	High	High	0	1.121e-05	3.41	92.03	Used
	TRUE	High	KHEAFESDLAAHQDRVEQIAAIAQELNELDYYDSPSVNAR	1xDeamidated [Q/N]	FALSE	0.000397557	0	1	5	11	XP_866874.1	2	4544.16	0	0.475	0.726658	0	135.5	64.5	6.81941e+06	3.24259e+06		High	High	High	0	4.367e-05	4.33	91.99	Used
	TRUE	High	KQFAAQANVIGPWIQTK		FALSE	3.79447e-05	0	1	5	4	XP_866874.1	1	1900.04	0	0.526	0.787106	0	131	69	2209900	1.16294e+06		High	High	High	0	6.908e-05	3.22	53.17	Used
	TRUE	High	VLAVNQENEQLMEDYEK	1xOxidation [M12]	FALSE	5.79304e-06	0	1	5	6	XP_866874.1	0	2067.95	0	1.107	0.975735	0	94.9	105.1	4.28616e+06	4.74411e+06		High	High	High	0	5.047e-06	3.77	34.71	Used
	TRUE	High	VLAVNQENEQLMEDYEKLASDLLEWIR	1xOxidation [M12]	FALSE	8.49114e-05	0	1	5	1	XP_866874.1	1	3264.61	0	0.01	9.75497e-17		200		1.1957e+06			High	Not Found	High	0	1.167e-05	3.28	133.32	Used
	TRUE	High	ISIEMHGTLEDQLSHLR		FALSE	0.00102399	0	1	5	1	XP_866874.1	0	1979	0	0.522	0.78209	0	131.4	68.6	1.64437e+06	858791		High	Peak Found	High	0	9.518e-05	3.09	60.5	Used
	TRUE	High	QFAAQANVIGPWIQTK		FALSE	0.000408374	0	1	5	3	XP_866874.1	0	1771.95	0	0.437	0.67226	0	139.2	60.8	1.78041e+06	777716		High	High	High	0	4.448e-05	3.29	64.93	Used
	TRUE	High	LVSIGAEEIVDGNVK		FALSE	5.91088e-06	0	2	7	8	XP_866874.1; XP_536333.2	0	1542.84	0	0.673	0.89828	0	119.6	80.4	4.37148e+06	2941588	Shared	High	High	High	0	1.174e-06	3.71	47.67	Used
	TRUE	High	MLDAEDIVGTARPDEK	1xOxidation [M1]	FALSE	7.83402e-05	0	1	5	5	XP_866874.1	0	1775.85	0	1.151	0.972411	0	93	107	17592633	20250901		High	High	High	0.0001485	0.0002318	3.07	35.96	Used
	TRUE	High	ISIEMHGTLEDQLSHLR	1xOxidation [M5]	FALSE	0.000717575	0	1	5	2	XP_866874.1	0	1995	0	0.708	0.907887	0	117.1	82.9	5.15556e+06	3.65036e+06		High	High	High	0.0002019	0.00169	2.69	50.16	Used
	TRUE	High	LSNRPAFMPSEGR		FALSE	0.000205944	0	1	5	2	XP_866874.1	0	1461.73	0	0.318	0.419268	0	151.7	48.3	2.09123e+06	665574		High	High	High	0	2.489e-05	3.11	25.68	Used
	TRUE	High	TINEVENQILTR		FALSE	8.54833e-05	0	2	10	5	XP_866874.1; XP_541640.2	0	1429.76	0	0.52	0.781136	0	131.5	68.5	16459760	8564588	Shared	High	High	High	0	1.177e-05	3.18	40.99	Used
	TRUE	High	MTLGMIWTIILR	2xOxidation [M1; M5]	FALSE	0.000106679	0	3	15	7	XP_866874.1; XP_536333.2; XP_541640.2	0	1479.81	0	0.521	0.781435	0	131.5	68.5	1.19828e+06	624476	Shared	High	High	High	0	1.417e-05	3.28	102.61	Used
	TRUE	High	FAIQDISVEETSAK		FALSE	3.95041e-05	0	3	15	3	XP_866874.1; XP_536333.2; XP_541640.2	0	1537.77	0	0.616	0.864496	0	123.8	76.2	9008748	5.54869e+06	Shared	High	High	High	0	6.033e-06	3.33	46.32	Used
	TRUE	High	ACLISLGYDIGNDPQGEAEFAR	1xCarbamidomethyl [C2]; 1xDeamidated [Q/N]	FALSE	0.000117979	0	1	1	4	XP_866874.1	0	2397.1	0								No Quan Values	High	High	High	0	1.548e-05	3.29		Not Used
	TRUE	High	ETADTDTADQVMASFK	1xOxidation [M12]	FALSE	9.20767e-07	0	1	5	7	XP_866874.1	0	1745.75	0	0.621	0.87102	0	123.4	76.6	2.51198e+07	1.56046e+07		High	High	High	0	2.363e-07	4.11	27.74	Used
	TRUE	High	ASFNHFDRDHSGTLGPEEFK		FALSE	0.00118683	0	1	4	4	XP_866874.1	1	2291.05	0	0.905	0.975798	0	105	95	1.25466e+07	11360194		High	High	High	0.0001485	0.0003839	2.63	33.52	Used
	TRUE	High	CQLEINFNTLQTK	1xCarbamidomethyl [C1]	FALSE	5.45216e-05	0	3	15	3	XP_866874.1; XP_536333.2; XP_541640.2	0	1608.81	0	0.01	9.75497e-17		200		1.19462e+06		Shared	High	Not Found	High	0	0.0001398	2.83	55.37	Used
	TRUE	High	ACLISLGYDIGNDPQGEAEFAR	1xCarbamidomethyl [C2]	FALSE	2.6945e-05	0	1	1	3	XP_866874.1	0	2396.12	0	0.674	0.89828	0	119.5	80.5	975876	657345		High	Peak Found	High	0	2.608e-05	4.32	71.28	Used
	TRUE	High	DYETATLSEIK		FALSE	0.00123557	0	1	5	1	XP_866874.1	0	1269.62	0	0.748	0.926594	0	114.4	85.6	939764	703326		Peak Found	High	High	0	0.0001105	1.86	36.48	Used
	TRUE	High	AGTQIENIEEDFRDGLK		FALSE	0.00101715	0	1	5	2	XP_866874.1	1	1934.95	1	0.5	0.756787	0	133.3	66.7	2109604	1.05512e+06		High	High	High	0	9.455e-05	3.8	65.97	Used
	TRUE	High	AGTQIENIEEDFRDGLK	1xDeamidated [N7]	FALSE	0.000657633	0	1	5	2	XP_866874.1	1	1935.93	0								Not Reliable	High	High	High	0	6.622e-05	3.8		Not Used
	TRUE	High	ELPPDQAEYCIAR	1xCarbamidomethyl [C10]	FALSE	0.000212973	0	2	10	8	XP_866874.1; XP_541640.2	0	1561.73	0	1.276	0.942464	0	87.9	112.1	11086425	1.41441e+07	Shared	High	High	High	0.0001485	0.0002174	2.5	31.73	Used
	TRUE	High	DDPLTNLNTAFDVAEK		FALSE	0.000221724	0	1	5	2	XP_866874.1	0	1762.85	0	0.533	0.795792	0	130.4	69.6	2.04752e+06	1.09182e+06		High	High	High	0	2.662e-05	3.67	69.48	Used
	TRUE	High	AIMTYVSSFYHAFSGAQK	1xOxidation [M3]	FALSE	5.0664e-07	0	2	8	8	XP_866874.1; XP_541640.2	0	2023.96	0	0.513	0.771522	0	132.2	67.8	1.29315e+07	6.63048e+06	Shared	High	High	High	0	1.407e-07	4.56	71.42	Used
	TRUE	High	AIMTYVSSFYHAFSGAQK	1xDeamidated [Q17]; 1xOxidation [M3]	FALSE	0.000101783	0	2	8	3	XP_866874.1; XP_541640.2	0	2024.94	0								Not Reliable	High	High	High	0	1.366e-05	4.6		Not Used
	TRUE	High	AIMTYVSSFYHAFSGAQK		FALSE	7.62832e-06	0	2	8	4	XP_866874.1; XP_541640.2	0	2007.96	0	0.128	0.0293372	0	177.3	22.7	3.10701e+06	397728	Shared	High	High	High	0	1.465e-06	4.59	85.83	Used
	TRUE	High	EGLLLWCQR	1xCarbamidomethyl [C7]	FALSE	0.00248156	0.000331607	3	15	4	XP_866874.1; XP_536333.2; XP_541640.2	0	1174.6	0	0.8	0.951058	0	111.1	88.9	1.58147e+06	1.2659e+06	Shared	High	High	High	0.0001092	0.0001851	2.98	55.83	Used
	TRUE	High	GISQEQMNEFR	1xOxidation [M7]	FALSE	0.00268939	0.000331607	1	5	1	XP_866874.1	0	1354.61	0	0.01	9.75497e-17		200		51736.8			High	Not Found	High	0.0001092	0.0001962	2.48	17.64	Used
	TRUE	High	ASFNHFDRDHSGTLGPEEFK	1xDeamidated [N4]	FALSE	0.00204313	0.000331607	1	4	1	XP_866874.1	1	2292.03	0								Not Reliable	High	Not Found	High	0.0001092	0.0001616	3.94		Not Used
	TRUE	High	MLDAEDIVGTARPDEK		FALSE	0.00475294	0.000480221	1	5	2	XP_866874.1	0	1759.85	0	0.426	0.655592	0	140.3	59.7	2243473	954742		High	High	High	0.0001485	0.0002886	1.74	41.1	Used
	TRUE	High	QKDYETATLSEIK		FALSE	0.00817265	0.000480221	1	5	3	XP_866874.1	1	1525.77	0	0.372	0.546782	0	145.7	54.3	22403551	8.34518e+06		High	Peak Found	High	0.0001485	0.0004389	2.46	28.72	Used
	TRUE	High	ASIHEAWTDGKEAMLR	1xOxidation [M14]	FALSE	0.00435665	0.000480221	1	5	3	XP_866874.1	1	1830.88	0	0.631	0.876904	0	122.6	77.4	8.35213e+06	5.27225e+06		High	High	High	0.0002019	0.000891	2.64	28	Used
	TRUE	High	ASIHEAWTDGKEAMLR		FALSE	0.0111128	0.000480221	1	5	1	XP_866874.1	1	1814.89	0								No Quan Values	High	Not Found	High	0.0001485	0.0005841	2.73		Not Used
	TRUE	High	NVNIQNFHISWK		FALSE	0.00326628	0.000480221	1	5	2	XP_866874.1	0	1499.78	0	0.546	0.810993	0	129.3	70.7	1.44484e+06	789295		High	High	High	0.0001485	0.000623	2.1	59.65	Used
	TRUE	High	VLAVNQENEQLMEDYEKLASDLLEWIR	1xDeamidated [N8]; 1xOxidation [M12]	FALSE	0.005434	0.000480221	1	5	1	XP_866874.1	1	3265.59	0								No Quan Values	High	Not Found	High	0.0001485	0.0003183	3.38		Not Used
	TRUE	High	VLAVNQENEQLMEDYEK		FALSE	0.00940406	0.000480221	1	5	1	XP_866874.1	0	2051.96	0								No Quan Values	High	Not Found	High	0.0001485	0.0004964	2.48		Not Used
	TRUE	High	IDQLEGDHQLIQEALIFDNKHTNYTMEHIR	1xOxidation [M26]	FALSE	0.00344613	0.000480221	1	5	2	XP_866874.1	1	3637.77	0	0.623	0.87102	0	123.2	76.8	2.02642e+06	1.26329e+06		High	High	High	0.0001485	0.0002318	2.97	69.56	Used
	TRUE	High	HRPELIDYGKLR		FALSE	0.0142233	0.000480221	1	5	1	XP_866874.1	1	1496.83	0								No Quan Values	High	Not Found	High	0.0001485	0.0007582	1.98		Not Used
	TRUE	High	HEAFESDLAAHQDRVEQIAAIAQELNELDYYDSPSVNAR	2xDeamidated [Q12; Q17]	FALSE	0.00353973	0.000480221	1	5	1	XP_866874.1	1	4417.05	0								No Quan Values	High	Not Found	High	0.0001485	0.000236	3.48		Not Used
	TRUE	High	GYEEWLLNEIR		FALSE	0.00303419	0.000480221	3	12	1	XP_866874.1; XP_536333.2; XP_541640.2	0	1421.71	0								No Quan Values	High	Not Found	High	0.0001485	0.0002124	2.43		Not Used
	TRUE	High	KHEAFESDLAAHQDRVEQIAAIAQELNELDYYDSPSVNAR	2xDeamidated [Q18; Q]	FALSE	0.00340026	0.000480221	1	5	9	XP_866874.1	2	4545.14	0								No Quan Values	High	High	High	0.0001485	0.0003845	4.33		Not Used
	TRUE	High	KDDPLTNLNTAFDVAEK	1xDeamidated [N]	FALSE	0.00612978	0.000480221	1	5	2	XP_866874.1	1	1891.93	0								Not Reliable	Not Found	High	High	0.0001485	0.0003482	2.33		Not Used
	TRUE	High	LRKDDPLTNLNTAFDVAEK	1xDeamidated [N]	FALSE	0.00272569	0.000480221	1	5	3	XP_866874.1	2	2161.11	0								Not Reliable	High	Not Found	High	0.0001485	0.0001976	3.77		Not Used
	TRUE	High	LRKDDPLTNLNTAFDVAEK		FALSE	0.00283752	0.000480221	1	5	3	XP_866874.1	2	2160.13	0								No Quan Values	High	High	High	0.0002019	0.001482	3.06		Not Used
	TRUE	High	LSNRPAFMPSEGR	1xOxidation [M8]	FALSE	0.00785128	0.000480221	1	5	2	XP_866874.1	0	1477.72	0	0.226	0.236647	0	163.2	36.8	638834	144082		High	High	High	0.001436	0.01702	1.86	17.33	Used
	TRUE	High	ISIEMHGTLEDQLSHLR	1xDeamidated [Q12]	FALSE	0.00404721	0.000480221	1	5	1	XP_866874.1	0	1979.99	0								Not Reliable	High	Not Found	High	0.0001485	0.0002587	1.88		Not Used
	TRUE	High	IVQTYHVNMAGTNPYTTITPQEINGK	1xDeamidated [Q/N]; 1xOxidation [M9]	FALSE	0.00525511	0.000480221	1	5	2	XP_866874.1	0	2907.42	0								Not Reliable	High	Not Found	High	0.0001485	0.0003558	3.12		Not Used
	TRUE	High	DDPLTNLNTAFDVAEKYLDIPK	1xDeamidated [N]	FALSE	0.0235726	0.000666919	1	5	2	XP_866874.1	1	2493.24	0								No Quan Values	High	Not Found	High	0.0002019	0.001444	2.43		Not Used
	TRUE	High	DGLGFCALIHR	1xCarbamidomethyl [C6]	FALSE	0.0191901	0.000666919	1	5	2	XP_866874.1	0	1258.64	0	0.638	0.877459	0	122.1	77.9	5.82905e+06	3719096		High	High	High	0.0002019	0.001094	2.33	53.37	Used
	TRUE	High	TINEVENQILTR	1xDeamidated [N/Q]	FALSE	0.0338894	0.000865703	2	10	8	XP_866874.1; XP_541640.2	0	1430.75	0	0.897	0.974468	0	105.4	94.6	496423	445275	Shared	High	High	High	0.005204	0.06976	2.75	34.22	Used
	TRUE	High	MAPYSGPDAVPGALDYMSFSTALYGESDL	2xOxidation [M1; M17]	FALSE	0.0323646	0.000865703	1	5	2	XP_866874.1	0	3057.34	0								No Quan Values	High	Not Found	High	0.0002602	0.002336	3.2		Not Used
	TRUE	High	IMSIVDPNRLGVVTFQAFIDFMSR	1xDeamidated [Q16]; 2xOxidation [M2; M22]	FALSE	0.0303017	0.000865703	1	5	1	XP_866874.1	1	2789.4	0								Not Reliable	High	Not Found	High	0.0002602	0.002109	2.7		Not Used
	TRUE	High	AIMTYVSSFYHAFSGAQK	1xDeamidated [Q17]	FALSE	0.0498386	0.00101489	2	8	2	XP_866874.1; XP_541640.2	0	2008.95	0								No Quan Values	High	High	High	0.000303	0.004904	2.25		Not Used
	TRUE	High	IVQTYHVNMAGTNPYTTITPQEINGK	1xOxidation [M9]	FALSE	0.0443275	0.00101489	1	5	1	XP_866874.1	0	2906.44	0	0.01	9.75497e-17		200		1.72629e+06			High	Not Found	High	0.000303	0.003994	2.76	44.65	Used
	TRUE	High	ILAGDKNYITVDELRR		FALSE	0.0605204	0.00139497	1	5	2	XP_866874.1	2	1876.03	0	0.78	0.941075	0	112.3	87.7	12461975	9722315		High	High	High	0.0004148	0.007062	1.41	38.94	Used
	TRUE	High	KDDPLTNLNTAFDVAEKYLDIPK		FALSE	0.0542241	0.00139497	1	5	1	XP_866874.1	2	2620.35	0	0.01	9.75497e-17		200		1.08518e+06			High	Not Found	High	0.0004148	0.005727	2.92	107.87	Used
	TRUE	High	ETADTDTADQVMASFK		FALSE	0.0552876	0.00139497	1	5	1	XP_866874.1	0	1729.76	0								No Quan Values	High	Not Found	High	0.0004148	0.005972	2.08		Not Used
	TRUE	High	TFTAWCNSHLR	1xCarbamidomethyl [C6]	FALSE	0.0849103	0.00326873	3	13	1	XP_866874.1; XP_536333.2; XP_541640.2	0	1392.65	0	0.427	0.656438	0	140.1	59.9	936410	400041	Shared	High	Peak Found	High	0.001074	0.01322	2.02	33.34	Used
	TRUE	High	LEDFRDYRR		FALSE	0.128847	0.00640612	3	15	1	XP_866874.1; XP_536333.2; XP_541640.2	2	1269.63	0	0.242	0.233226	0	161	39	1991915	482807	Shared	High	Peak Found	High	0.002348	0.02726	1.59	20.29	Used
	TRUE	High	KTFTAWCNSHLRK	1xCarbamidomethyl [C7]	FALSE	0.13284	0.00674258	3	12	1	XP_866874.1; XP_536333.2; XP_541640.2	2	1648.84	0	0.558	0.828457	0	128.4	71.6	582557	325149	Shared	High	Peak Found	High	0.002442	0.02868	2.08	20.82	Used
	TRUE	High	DDPLTNLNTAFDVAEKYLDIPK		FALSE	0.14288	0.0068648	1	5	1	XP_866874.1	1	2492.26	0								No Quan Values	High	Not Found	High	0.002471	0.03264	2.14		Not Used
	TRUE	High	ALDFIASK		FALSE	0.167983	0.00885001	2	13	1	XP_866874.1; XP_541640.2	0	864.483	0	0.132	0.032429	0	176.8	23.2	1.40793e+06	185178	Shared	High	Peak Found	High	0.003198	0.04259	1.4	31.35	Used
TRUE	High	Master Protein	XP_005629424.1	fibrinogen beta chain [Canis lupus familiaris]	0	FALSE	384.751	68	30	301	29	1	495	56.3	7.56	611.01	30	1	1.35	0.998773	44.69	82.1	117.9	2.52892e+08	3.63473e+08	High	High
	Checked	Confidence	Sequence	Modifications	Contaminant	Qvality PEP	Qvality q-value	# Protein Groups	# Proteins	# PSMs	Master Protein Accessions	# Missed Cleavages	Theo. MH+ [Da]	# Razor Quan Results	Abundance Ratio: (F4, Sample) / (F3, Control)	Abundance Ratio Adj. P-Value: (F4, Sample) / (F3, Control)	Abundance Ratio Variability [%]: (F4, Sample) / (F3, Control)	Abundances (Grouped): F3, Control	Abundances (Grouped): F4, Sample	Abundance: F3: Control	Abundance: F4: Sample	Quan Info	Found in Sample: [S3] F3: Control	Found in Sample: [S4] F4: Sample	Confidence (by Search Engine): Sequest HT	Percolator q-Value (by Search Engine): Sequest HT	Percolator PEP (by Search Engine): Sequest HT	XCorr (by Search Engine): Sequest HT	Top Apex RT [min]	Quan Usage
	TRUE	High	YYWGGHYSWDMAK	1xOxidation [M11]	FALSE	0.000364342	0	1	1	2	XP_005629424.1	0	1679.69	0	1.612	0.870982	0	76.6	123.4	1.55848e+06	2.51163e+06		High	High	High	0.0001092	0.0001541	2.53	45.6	Used
	TRUE	High	LESDVSAQMEYCR	1xCarbamidomethyl [C12]	FALSE	1.71856e-05	0	1	1	6	XP_005629424.1	0	1587.68	0	1.137	0.9743	0	93.6	106.4	7560603	8.59781e+06		High	High	High	0	2.948e-06	3.92	25.84	Used
	TRUE	High	LESDVSAQMEYCR	1xCarbamidomethyl [C12]; 1xDeamidated [Q8]	FALSE	0.000782978	0	1	1	3	XP_005629424.1	0	1588.66	0	1.833	0.843463	0	70.6	129.4	226142	414476		High	High	High	0	7.664e-05	2.96	26.98	Used
	TRUE	High	LESDVSAQMEYCR	1xCarbamidomethyl [C12]; 1xOxidation [M9]	FALSE	1.53323e-05	0	1	1	10	XP_005629424.1	0	1603.67	0	3.473	0.347668	0	44.7	155.3	741829	2.57666e+06		High	High	High	0	6.366e-06	2.94	17.83	Used
	TRUE	High	LESDVSAQMEYCR	1xCarbamidomethyl [C12]; 1xDeamidated [Q8]; 1xOxidation [M9]	FALSE	1.18804e-05	0	1	1	2	XP_005629424.1	0	1604.66	0	7.295	0.0772236	0	24.1	175.9	51460.4	375429		High	High	High	0	2.149e-06	3.73	19.99	Used
	TRUE	High	IQKLESDVSAQMEYCR	1xCarbamidomethyl [C15]	FALSE	8.37791e-05	0	1	1	3	XP_005629424.1	1	1956.92	0								No Quan Values	High	High	High	0	2.061e-05	3.22		Not Used
	TRUE	High	IQKLESDVSAQMEYCR	1xCarbamidomethyl [C15]; 1xOxidation [M12]	FALSE	2.11656e-06	0	1	1	14	XP_005629424.1	1	1972.91	0	2.166	0.707601	0	63.2	136.8	1.17102e+07	2.53607e+07		High	High	High	0	8.288e-06	3.73	22.88	Used
	TRUE	High	IQKLESDVSAQMEYCR	1xCarbamidomethyl [C15]; 1xDeamidated [Q]; 1xOxidation [M12]	FALSE	6.36384e-06	0	1	1	7	XP_005629424.1	1	1973.89	0	1.54	0.89828	0	78.7	121.3	268153	413054		High	High	High	0	1.429e-05	3.77	25.62	Used
	TRUE	High	IQKLESDVSAQMEYCR	1xCarbamidomethyl [C15]; 2xDeamidated [Q2; Q11]; 1xOxidation [M12]	FALSE	0.000201839	0	1	1	3	XP_005629424.1	1	1974.88	0								No Quan Values	High	High	High	0	2.45e-05	3.3		Not Used
	TRUE	High	HQLYIEETVTSNIPTNLR		FALSE	2.48598e-05	0	1	1	4	XP_005629424.1	0	2128.1	0	1.32	0.930356	0	86.2	113.8	1815570	2.39614e+06		High	High	High	0	2.976e-05	2.14	57.99	Used
	TRUE	High	HQLYIEETVTSNIPTNLR	1xDeamidated [N/Q]	FALSE	2.43697e-06	0	1	1	5	XP_005629424.1	0	2129.09	0								Not Reliable	High	High	High	0	5.47e-07	3.78		Not Used
	TRUE	High	KAPDAGGCLHADPDLGVLCPTGCQLQDTLVK	3xCarbamidomethyl [C8; C19; C23]	FALSE	0.00072727	0	1	1	3	XP_005629424.1	1	3306.59	0	0.621	0.870982	0	123.4	76.6	4587545	2.84754e+06		High	High	High	0.0002602	0.001871	3.22	62.67	Used
	TRUE	High	KAPDAGGCLHADPDLGVLCPTGCQLQDTLVK	3xCarbamidomethyl [C8; C19; C23]; 1xDeamidated [Q]	FALSE	0.000273007	0	1	1	4	XP_005629424.1	1	3307.58	0	100	9.75497e-17			200		2.56466e+06		High	High	High	0	3.178e-05	4.68	62.62	Used
	TRUE	High	HGTDDGVVWMNWK		FALSE	0.00134814	0	1	1	1	XP_005629424.1	0	1544.7	0								No Quan Values	Not Found	High	High	0	0.0001181	2.95		Not Used
	TRUE	High	KREEAPSLRPAPPPISGGGYR		FALSE	0.000384438	0	1	1	21	XP_005629424.1	2	2235.2	0	1.054	0.987784	0	97.4	102.6	8.97583e+07	9.45909e+07		High	High	High	0.0001485	0.000528	2.78	27.66	Used
	TRUE	High	QGFGNIATSADGK		FALSE	0.000788249	0	1	1	2	XP_005629424.1	0	1265.61	0	5.336	0.177955	0	31.6	168.4	85441.6	455894		High	High	High	0	7.691e-05	3.05	23.76	Used
	TRUE	High	SIDELNNNVESVSQSSSSTFQYITLLK	1xDeamidated [N/Q]	FALSE	2.76846e-06	0	1	1	34	XP_005629424.1	0	3004.46	0	0.84	0.971875	0	108.7	91.3	578924	486187		High	High	High	0	7.617e-07	5.91	85.8	Used
	TRUE	High	SIDELNNNVESVSQSSSSTFQYITLLK	2xDeamidated [Q/N]	FALSE	0.00120286	0	1	1	7	XP_005629424.1	0	3005.45	0								No Quan Values	High	High	High	0	0.0001081	3.63		Not Used
	TRUE	High	SIDELNNNVESVSQSSSSTFQYITLLKDMWK	1xDeamidated [Q]; 1xOxidation [M29]	FALSE	6.15234e-05	0	1	1	6	XP_005629424.1	1	3580.7	0								No Quan Values	High	High	High	0.0001092	0.0001907	4.31		Not Used
	TRUE	High	SIDELNNNVESVSQSSSSTFQYITLLKDMWK	2xDeamidated [N/Q]; 1xOxidation [M29]	FALSE	0.000338413	0	1	1	2	XP_005629424.1	1	3581.68	0								Not Reliable	High	Not Found	High	0	3.807e-05	3.91		Not Used
	TRUE	High	SIDELNNNVESVSQSSSSTFQYITLLK		FALSE	5.27461e-07	0	1	1	10	XP_005629424.1	0	3003.48	0	1.142	0.9743	0	93.4	106.6	1.16313e+07	1.32872e+07		High	High	High	0	1.455e-07	5.17	84.64	Used
	TRUE	High	SKIQKLESDVSAQMEYCR	1xCarbamidomethyl [C17]; 1xOxidation [M14]	FALSE	1.93926e-05	0	1	1	3	XP_005629424.1	2	2188.04	0	0.715	0.909749	0	116.6	83.4	1.75384e+06	1.2534e+06		High	High	High	0.0001485	0.0002895	3.02	28.25	Used
	TRUE	High	SKIQKLESDVSAQMEYCR	1xCarbamidomethyl [C17]; 1xDeamidated [Q]; 1xOxidation [M14]	FALSE	0.000144297	0	1	1	4	XP_005629424.1	2	2189.02	0								No Quan Values	High	High	High	0	1.842e-05	3.89		Not Used
	TRUE	High	TWDPYKQGFGNIATSADGKK		FALSE	0.000357079	0	1	1	5	XP_005629424.1	2	2184.07	0	1.04	0.991149	0	98	102	7.80199e+06	8.11264e+06		High	High	High	0	3.986e-05	3.34	42.74	Used
	TRUE	High	NGGETSEMYLIQPHSSITPYR		FALSE	0.000439662	0	1	1	3	XP_005629424.1	0	2380.12	0	0.793	0.947226	0	111.6	88.4	1.29028e+06	1.02272e+06		High	High	High	0	4.75e-05	3.77	50.62	Used
	TRUE	High	NGGETSEMYLIQPHSSITPYR	1xOxidation [M8]	FALSE	0.000329449	0	1	1	8	XP_005629424.1	0	2396.12	0	1.046	0.990583	0	97.7	102.3	1.05762e+07	1.10673e+07		High	High	High	0	3.71e-05	3.09	41.68	Used
	TRUE	High	NGGETSEMYLIQPHSSITPYR	1xDeamidated [Q/N]; 1xOxidation [M8]	FALSE	0.00027856	0	1	1	10	XP_005629424.1	0	2397.1	0	1.343	0.924649	0	85.4	114.6	2882841	3871748		High	High	High	0.0002019	0.0009661	3.36	47.32	Used
	TRUE	High	NGGETSEMYLIQPHSSITPYR	2xDeamidated [N1; Q12]; 1xOxidation [M8]	FALSE	0.000136753	0	1	1	5	XP_005629424.1	0	2398.09	0								No Quan Values	High	High	High	0	1.762e-05	2.95		Not Used
	TRUE	High	TPCTVSCNIPVVSGKECEEIIR	3xCarbamidomethyl [C3; C7; C17]; 1xDeamidated [N8]	FALSE	0.000957551	0	1	1	1	XP_005629424.1	1	2549.2	0								Not Reliable	High	Not Found	High	0	9.014e-05	3.67		Not Used
	TRUE	High	TPCTVSCNIPVVSGKECEEIIR	3xCarbamidomethyl [C3; C7; C17]	FALSE	0.000235531	0	1	1	3	XP_005629424.1	1	2548.22	0	0.847	0.971875	0	108.3	91.7	5657934	4792676		High	High	High	0	3.944e-05	2.89	46.99	Used
	TRUE	High	TPCTVSCNIPVVSGK	2xCarbamidomethyl [C3; C7]	FALSE	0.000154314	0	1	1	9	XP_005629424.1	0	1618.79	0	1.759	0.828457	0	72.5	127.5	7.95186e+06	1.39873e+07		High	High	High	0.0001485	0.0008603	2.99	32.35	Used
	TRUE	High	DNENAINEYSSELEK		FALSE	4.8642e-05	0	1	1	1	XP_005629424.1	0	1754.77	0	1.716	0.839139	0	73.6	126.4	1.25364e+06	2.15169e+06		High	Peak Found	High	0	7.248e-06	2.05	41.17	Used
	TRUE	High	DNENAINEYSSELEKHQLYIEETVTSNIPTNLR		FALSE	0.000496113	0	1	1	1	XP_005629424.1	1	3863.86	0	0.945	0.987784	0	102.8	97.2	11206623	10591529		High	Peak Found	High	0	5.247e-05	2.96	92.62	Used
	TRUE	High	DNENAINEYSSELEKHQLYIEETVTSNIPTNLR	1xDeamidated [Q/N]	FALSE	3.87165e-05	0	1	1	10	XP_005629424.1	1	3864.84	0	0.931	0.979956	0	103.6	96.4	3416877	3.18136e+06		High	High	High	0	5.607e-05	4.7	92.6	Used
	TRUE	High	DNENAINEYSSELEKHQLYIEETVTSNIPTNLR	2xDeamidated [N/Q]	FALSE	2.84315e-05	0	1	1	6	XP_005629424.1	1	3865.83	0								No Quan Values	High	High	High	0	2.372e-05	4.59		Not Used
	TRUE	High	VYCDMTTDSGGWTVIQNR	1xCarbamidomethyl [C3]	FALSE	0.000174131	0	1	1	2	XP_005629424.1	0	2102.93	0								No Quan Values	High	High	High	0	2.157e-05	3.53		Not Used
	TRUE	High	VYCDMTTDSGGWTVIQNR	1xCarbamidomethyl [C3]; 1xDeamidated [Q16]	FALSE	1.08876e-05	0	1	1	1	XP_005629424.1	0	2103.91	0								Not Reliable	Not Found	High	High	0	1.985e-06	2.19		Not Used
	TRUE	High	VYCDMTTDSGGWTVIQNR	1xCarbamidomethyl [C3]; 1xOxidation [M5]	FALSE	1.70782e-07	0	1	1	6	XP_005629424.1	0	2118.92	0	1.683	0.850825	0	74.5	125.5	4.72689e+06	7.95506e+06		High	High	High	0	3.59e-07	3.74	41.56	Used
	TRUE	High	VYCDMTTDSGGWTVIQNR	1xCarbamidomethyl [C3]; 1xDeamidated [N/Q]; 1xOxidation [M5]	FALSE	5.38071e-06	0	1	1	3	XP_005629424.1	0	2119.91	0								No Quan Values	High	High	High	0.0001485	0.0002177	3.14		Not Used
	TRUE	High	EEAPSLRPAPPPISGGGYR		FALSE	0.00126069	0	1	1	5	XP_005629424.1	0	1951	0	1.433	0.902642	0	82.2	117.8	1.24443e+07	1.78286e+07		High	High	High	0	0.0001119	3.28	34.79	Used
	TRUE	High	ALYGGFTMQNEANK		FALSE	0.0011789	0	1	1	2	XP_005629424.1	0	1543.72	0								No Quan Values	High	High	High	0.0001485	0.0002205	3.04		Not Used
	TRUE	High	ALYGGFTMQNEANK	1xOxidation [M8]	FALSE	2.45283e-05	0	1	1	3	XP_005629424.1	0	1559.72	0	7.449	0.0352127	0	23.7	176.3	2583677	19244864		High	High	High	0	1.31e-05	3.18	27.99	Used
	TRUE	High	ALYGGFTMQNEANKYQLSVSK		FALSE	0.000166139	0	1	1	3	XP_005629424.1	1	2349.15	0	0.949	0.987784	0	102.6	97.4	2.97762e+06	2.82528e+06		High	High	High	0	0.0001482	4.04	53.28	Used
	TRUE	High	ALYGGFTMQNEANKYQLSVSK	1xOxidation [M8]	FALSE	3.64633e-07	0	1	1	6	XP_005629424.1	1	2365.15	0	0.949	0.987784	0	102.6	97.4	1.32578e+07	1.25781e+07		High	High	High	0	1.061e-07	3.05	43.72	Used
	TRUE	High	ALYGGFTMQNEANKYQLSVSK	1xDeamidated [N/Q]	FALSE	7.27818e-06	0	1	1	7	XP_005629424.1	1	2350.14	0								Not Reliable	High	High	High	0	1.404e-06	4.3		Not Used
	TRUE	High	YCGLPGEYWLGNDK	1xCarbamidomethyl [C2]	FALSE	0.00100359	0	1	1	3	XP_005629424.1	0	1671.75	0	2.163	0.708138	0	63.2	136.8	1.30645e+06	2.82623e+06		High	High	High	0.000303	0.003515	2.69	60.04	Used
	TRUE	High	KSIDELNNNVESVSQSSSSTFQYITLLK	1xDeamidated [Q/N]	FALSE	0.00230517	0.000331607	1	1	4	XP_005629424.1	1	3132.56	0								No Quan Values	High	High	High	0.0001092	0.0001757	3.74		Not Used
	TRUE	High	SIDELNNNVESVSQSSSSTFQYITLLKDMWK	1xOxidation [M29]	FALSE	0.0021557	0.000331607	1	1	4	XP_005629424.1	1	3579.72	0	0.01	9.75497e-17		200		579704			High	High	High	0.0002019	0.0009059	2.28	95.24	Used
	TRUE	High	ALYGGFTMQNEANKYQLSVSK	1xDeamidated [Q/N]; 1xOxidation [M8]	FALSE	0.0058102	0.000480221	1	1	5	XP_005629424.1	1	2366.13	0								No Quan Values	High	High	High	0.0001485	0.0003335	3.63		Not Used
	TRUE	High	ALYGGFTMQNEANK	1xDeamidated [Q/N]; 1xOxidation [M8]	FALSE	0.00494779	0.000480221	1	1	2	XP_005629424.1	0	1560.7	0								Not Reliable	Not Found	High	High	0.0001485	0.0005439	2.19		Not Used
	TRUE	High	KSIDELNNNVESVSQSSSSTFQYITLLK		FALSE	0.00373462	0.000480221	1	1	2	XP_005629424.1	1	3131.57	0								No Quan Values	High	High	High	0.0001485	0.0002444	2.66		Not Used
	TRUE	High	HGTDDGVVWMNWK	1xOxidation [M10]	FALSE	0.00779896	0.000480221	1	1	3	XP_005629424.1	0	1560.69	0	5.048	0.134581	0	33.1	166.9	1.34827e+06	6.80665e+06		High	High	High	0.0001485	0.0004218	2.5	40.96	Used
	TRUE	High	DNDGWITTDPK		FALSE	0.00719752	0.000480221	1	1	2	XP_005629424.1	0	1261.57	0	100	9.75497e-17			200		1.32442e+06		High	High	High	0.0001485	0.0007643	2.07	28.28	Used
	TRUE	High	YYWGGHYSWDMAK		FALSE	0.00429869	0.000480221	1	1	1	XP_005629424.1	0	1663.7	0								No Quan Values	Not Found	High	High	0.0001485	0.00027	1.79		Not Used
	TRUE	High	REEAPSLRPAPPPISGGGYR		FALSE	0.0161424	0.000666919	1	1	9	XP_005629424.1	1	2107.1	0	1.17	0.971875	0	92.1	107.9	1.8677e+07	2.18607e+07		High	High	High	0.0004148	0.00596	2.6	31.28	Used
	TRUE	High	TWDPYKQGFGNIATSADGKK	1xDeamidated [N11]	FALSE	0.0220608	0.000666919	1	1	1	XP_005629424.1	2	2185.06	0								Not Reliable	High	Not Found	High	0.0002019	0.001309	2.55		Not Used
	TRUE	High	NGGETSEMYLIQPHSSITPYR	1xDeamidated [Q12]	FALSE	0.0401899	0.00101489	1	1	1	XP_005629424.1	0	2381.11	0								No Quan Values	High	Not Found	High	0.000303	0.003357	2.25		Not Used
	TRUE	High	IRPFFPR		FALSE	0.116069	0.0051933	1	1	1	XP_005629424.1	0	932.546	0	6.064	0.0749589	0	28.3	171.7	7.27149e+06	44097708		Peak Found	High	High	0.001947	0.02299	1.1	32.77	Used
	TRUE	High	AILENLR		FALSE	0.120441	0.00590393	1	1	2	XP_005629424.1	0	828.494	0	6.523	0.0586462	0	26.6	173.4	903087	5890440		High	High	High	0.003826	0.04944	1.21	27.23	Used
	TRUE	High	ISQLTNMGPTELLIEMEDWKGDK	1xDeamidated [Q/N]; 2xOxidation [M7; M16]	FALSE	0.126503	0.00624136	1	1	2	XP_005629424.1	1	2681.27	0								Not Reliable	Not Found	High	High	0.002299	0.02685	2.43		Not Used
	TRUE	High	TWDPYKQGFGNIATSADGK	1xDeamidated [N11]	FALSE	0.128847	0.00640612	1	1	1	XP_005629424.1	1	2056.96	0								No Quan Values	High	Not Found	High	0.002348	0.02737	2.64		Not Used
TRUE	High	Master Protein	XP_003432953.1	tropomyosin alpha-4 chain isoform X3 [Canis lupus familiaris]	0	FALSE	292.579	77	28	360	15	1	248	28.5	4.69	675.25	28	17	0.851	0.919968	40.85	110.8	89.2	4.72905e+08	3.80698e+08	High	High
	Checked	Confidence	Sequence	Modifications	Contaminant	Qvality PEP	Qvality q-value	# Protein Groups	# Proteins	# PSMs	Master Protein Accessions	# Missed Cleavages	Theo. MH+ [Da]	# Razor Quan Results	Abundance Ratio: (F4, Sample) / (F3, Control)	Abundance Ratio Adj. P-Value: (F4, Sample) / (F3, Control)	Abundance Ratio Variability [%]: (F4, Sample) / (F3, Control)	Abundances (Grouped): F3, Control	Abundances (Grouped): F4, Sample	Abundance: F3: Control	Abundance: F4: Sample	Quan Info	Found in Sample: [S3] F3: Control	Found in Sample: [S4] F4: Sample	Confidence (by Search Engine): Sequest HT	Percolator q-Value (by Search Engine): Sequest HT	Percolator PEP (by Search Engine): Sequest HT	XCorr (by Search Engine): Sequest HT	Top Apex RT [min]	Quan Usage
	TRUE	High	IQALQQQADEAEDR		FALSE	0.000130476	0	1	2	4	XP_003432953.1	0	1614.77	0	7.262	0.0387095	0	24.2	175.8	273368	1985167		High	High	High	0	1.686e-05	3.26	19.42	Used
	TRUE	High	IQALQQQADEAEDR	1xDeamidated [Q]	FALSE	6.36384e-06	0	1	2	8	XP_003432953.1	0	1615.76	0	6.159	0.12426	0	27.9	172.1	72592.6	447096		High	High	High	0	2.401e-05	3.81	23.88	Used
	TRUE	High	IQALQQQADEAEDRAQGLQR		FALSE	0.000182507	0	1	2	9	XP_003432953.1	1	2268.13	0	0.63	0.876904	0	122.7	77.3	3.62844e+07	2.28456e+07		High	High	High	0.0002602	0.001918	3.13	35.93	Used
	TRUE	High	IQALQQQADEAEDRAQGLQR	1xDeamidated [Q]	FALSE	0.00041668	0	1	2	12	XP_003432953.1	1	2269.12	0	0.491	0.746304	0	134.1	65.9	4.54403e+06	2.23141e+06		High	High	High	0	4.536e-05	2.88	38.22	Used
	TRUE	High	HIAEEADRKYEEVAR		FALSE	6.44985e-06	0	2	13	49	NP_001239140.1; XP_003432953.1	2	1815.9	0	0.741	0.922256	0	114.9	85.1	7.33669e+07	5.43634e+07	Shared	High	High	High	0.0001485	0.0001991	3.48	15.77	Used
	TRUE	High	KIQALQQQADEAEDR		FALSE	3.74556e-07	0	1	2	15	XP_003432953.1	1	1742.87	0	3.689	0.301856	0	42.7	157.3	2.76697e+06	1.02076e+07		High	High	High	0	2.329e-07	4.34	17.73	Used
	TRUE	High	KIQALQQQADEAEDR	1xDeamidated [Q]	FALSE	3.50239e-07	0	1	2	34	XP_003432953.1	1	1743.85	0	2.499	0.609187	0	57.2	142.8	1.0895e+06	2.72296e+06		High	High	High	0	1.023e-07	4.53	18.93	Used
	TRUE	High	KIQALQQQADEAEDRAQGLQR		FALSE	1.43432e-07	0	1	2	21	XP_003432953.1	2	2396.23	0	0.658	0.888223	0	120.6	79.4	1.09774e+08	7.22398e+07		High	High	High	0	4.73e-08	3.71	33.64	Used
	TRUE	High	KIQALQQQADEAEDRAQGLQR	1xDeamidated [Q]	FALSE	0.000137674	0	1	2	37	XP_003432953.1	2	2397.21	0	0.641	0.877459	0	121.9	78.1	2.0153e+07	1.2924e+07		High	High	High	0	6.709e-05	4.58	35.86	Used
	TRUE	High	TIDDLEEKLAQAKEENVGLHQTLDQTLNELNCI	1xCarbamidomethyl [C32]; 1xDeamidated [Q/N]	FALSE	0.00105892	0	1	2	4	XP_003432953.1	2	3795.86	0								No Quan Values	High	Not Found	High	0	9.74e-05	5.53		Not Used
	TRUE	High	TIDDLEEKLAQAK		FALSE	0.000329449	0	1	2	4	XP_003432953.1	1	1473.78	0	0.807	0.953518	0	110.7	89.3	7313262	5.9054e+06		High	High	High	0	3.71e-05	3.79	40.28	Used
	TRUE	High	EENVGLHQTLDQTLNELNCI	1xCarbamidomethyl [C19]; 1xDeamidated [Q/N]	FALSE	0.000463912	0	1	2	17	XP_003432953.1	0	2341.1	0								No Quan Values	High	High	High	0	6.421e-05	4.46		Not Used
	TRUE	High	EENVGLHQTLDQTLNELNCI	1xCarbamidomethyl [C19]	FALSE	8.32388e-06	0	1	2	6	XP_003432953.1	0	2340.11	0	0.71	0.907887	0	117	83	5.25123e+06	3.72742e+06		High	High	High	0	1.576e-06	4.5	81.17	Used
	TRUE	High	AEVSELKCGDLEEELKNVTNNLK	1xCarbamidomethyl [C8]; 1xDeamidated [N]	FALSE	0.000276697	0	1	4	3	XP_003432953.1	2	2633.3	0								Not Reliable	High	Not Found	High	0	3.206e-05	4.11		Not Used
	TRUE	High	YSEKEDKYEEEIK		FALSE	0.000195178	0	1	4	4	XP_003432953.1	2	1689.79	1	3.971	0.254881	0	40.2	159.8	486081	1.93018e+06		High	High	High	0.0001485	0.0004093	2.71	15.52	Used
	TRUE	High	CGDLEEELKNVTNNLK	1xCarbamidomethyl [C1]	FALSE	0.00426999	0.000480221	1	4	5	XP_003432953.1	1	1875.91	0								No Quan Values	High	High	High	0.0002019	0.001015	2.69		Not Used
	TRUE	High	KIQALQQQADEAEDRAQGLQR	2xDeamidated [Q]	FALSE	0.0145105	0.000480221	1	2	7	XP_003432953.1	2	2398.2	0								No Quan Values	High	High	High	0.001527	0.02013	3.21		Not Used
	TRUE	High	LAQAKEENVGLHQTLDQTLNELNCI	1xCarbamidomethyl [C24]; 1xDeamidated [Q/N]	FALSE	0.0158231	0.000480221	1	2	2	XP_003432953.1	1	2852.41	0								Not Reliable	High	Not Found	High	0.0001485	0.0008613	4.09		Not Used
	TRUE	High	IQALQQQADEAEDRAQGLQR	2xDeamidated [Q]	FALSE	0.0158231	0.000480221	1	2	3	XP_003432953.1	1	2270.1	0								Not Reliable	High	High	High	0.002664	0.03567	2.91		Not Used
	TRUE	High	AEVSELKCGDLEEELK	1xCarbamidomethyl [C8]	FALSE	0.00438593	0.000480221	1	4	1	XP_003432953.1	1	1848.89	0								No Quan Values	High	Not Found	High	0.0001485	0.0002734	2.68		Not Used
	TRUE	High	LLSDKLKEAETR		FALSE	0.0114135	0.000480221	1	4	4	XP_003432953.1	2	1402.79	0	0.636	0.877459	0	122.2	77.8	2.1519e+06	1.3696e+06		High	High	High	0.0006407	0.008694	2.29	20.38	Used
	TRUE	High	AEVSELKCGDLEEELKNVTNNLK	1xCarbamidomethyl [C8]	FALSE	0.00399336	0.000480221	1	4	2	XP_003432953.1	2	2632.31	0	0.625	0.873277	0	123.1	76.9	1.47012e+06	918986		High	High	High	0.0001485	0.0002561	3.39	72.3	Used
	TRUE	High	EENVGLHQTLDQTLNELNCI	1xCarbamidomethyl [C19]; 2xDeamidated [Q8; Q/N]	FALSE	0.0343378	0.00101489	1	2	2	XP_003432953.1	0	2342.08	0								No Quan Values	High	Not Found	High	0.000303	0.00509	2.94		Not Used
	TRUE	High	TIDDLEEKLAQAKEENVGLHQTLDQTLNELNCI	1xCarbamidomethyl [C32]	FALSE	0.0518185	0.00101489	1	2	4	XP_003432953.1	2	3794.88	0	0.443	0.68286	0	138.6	61.4	4.8329e+06	2.1427e+06		High	High	High	0.000303	0.005274	4.18	95.07	Used
	TRUE	High	EKAEGDVAALNR		FALSE	0.0585994	0.00139497	1	2	3	XP_003432953.1	1	1272.65	0	1.697	0.901064	0	74.2	125.8	26006.1	44121.8		High	High	High	0.0004148	0.006641	2.77	14.34	Used
	TRUE	High	HIAEEADR		FALSE	0.107756	0.00429596	2	13	1	NP_001239140.1; XP_003432953.1	0	940.448	0	4.045	0.45321	0	39.6	160.4	4351.46	17601.5	Shared	Peak Found	High	High	0.001527	0.02013	1.33	8.95	Used
	TRUE	High	RKIQALQQQADEAEDR	1xDeamidated [Q4]	FALSE	0.170999	0.00936775	1	2	1	XP_003432953.1	2	1899.95	0	1.816	0.885998	0	71	129	52845.7	95972.2		Peak Found	High	High	0.003396	0.04373	1.73	16.43	Used
TRUE	High	Master Protein	NP_001003026.1	serum albumin precursor [Canis lupus familiaris]	0	FALSE	287.593	63	35	216	28	1	608	68.6	5.69	414.2	35	0	0.961	0.955956	27.75	94	106	1.6648e+08	1.87563e+08	High	High
	Checked	Confidence	Sequence	Modifications	Contaminant	Qvality PEP	Qvality q-value	# Protein Groups	# Proteins	# PSMs	Master Protein Accessions	# Missed Cleavages	Theo. MH+ [Da]	# Razor Quan Results	Abundance Ratio: (F4, Sample) / (F3, Control)	Abundance Ratio Adj. P-Value: (F4, Sample) / (F3, Control)	Abundance Ratio Variability [%]: (F4, Sample) / (F3, Control)	Abundances (Grouped): F3, Control	Abundances (Grouped): F4, Sample	Abundance: F3: Control	Abundance: F4: Sample	Quan Info	Found in Sample: [S3] F3: Control	Found in Sample: [S4] F4: Sample	Confidence (by Search Engine): Sequest HT	Percolator q-Value (by Search Engine): Sequest HT	Percolator PEP (by Search Engine): Sequest HT	XCorr (by Search Engine): Sequest HT	Top Apex RT [min]	Quan Usage
	TRUE	High	LKECCDKPVLEK	2xCarbamidomethyl [C4; C5]	FALSE	0.000310138	0	1	2	2	NP_001003026.1	1	1518.77	0	0.744	0.907887	0	114.7	85.3	108342	80564.5		High	High	High	0	3.532e-05	2.36	13.34	Used
	TRUE	High	KAPQVSTPTLVEVSR		FALSE	2.82413e-05	0	1	2	14	NP_001003026.1	1	1611.91	0	1.156	0.971875	0	92.8	107.2	6.54378e+07	7.56517e+07		High	High	High	0.0001485	0.000252	3.46	32.27	Used
	TRUE	High	KAPQVSTPTLVEVSR	1xDeamidated [Q4]	FALSE	0.00157299	0	1	2	4	NP_001003026.1	1	1612.89	0	1.041	0.991149	0	98	102	781400	813407		High	High	High	0	0.0001329	3.33	33.24	Used
	TRUE	High	KAPQVSTPTLVEVSRK		FALSE	3.45413e-05	0	1	2	4	NP_001003026.1	2	1740	0	1.15	0.972536	0	93	107	3.98735e+06	4.58706e+06		High	High	High	0	5.383e-06	2.19	28.14	Used
	TRUE	High	GVFAECCQAADKAACLGPK	3xCarbamidomethyl [C6; C7; C15]	FALSE	0.00137554	0	1	2	1	NP_001003026.1	1	2052.93	0								No Quan Values	Not Found	High	High	0	0.0001199	1.84		Not Used
	TRUE	High	VLDEFKPLVDEPQNLVK		FALSE	1.35903e-06	0	1	2	12	NP_001003026.1	0	1983.08	0	1.023	0.993391	0	98.8	101.2	1.54332e+07	15793145		High	High	High	0	5.356e-07	4.12	61.45	Used
	TRUE	High	RHPYFYAPELLYYAQQYK		FALSE	4.45774e-05	0	1	2	7	NP_001003026.1	1	2350.17	0	0.942	0.98709	0	103	97	4.14829e+06	3.90605e+06		High	High	High	0	1.028e-05	3.85	79.35	Used
	TRUE	High	RHPYFYAPELLYYAQQYK	1xDeamidated [Q]	FALSE	0.000772541	0	1	2	5	NP_001003026.1	1	2351.15	0								Not Reliable	High	High	High	0.0001485	0.000659	3.1		Not Used
	TRUE	High	RPCFSGLEVDETYVPKEFNAETFTFHADLCTLPEAEK	2xCarbamidomethyl [C3; C30]	FALSE	0.000408374	0	1	2	2	NP_001003026.1	1	4348.02	0								No Quan Values	High	High	High	0	4.455e-05	3.19		Not Used
	TRUE	High	RHPEYSVSLLLR		FALSE	5.13374e-06	0	1	2	7	NP_001003026.1	1	1469.82	0	1.182	0.971875	0	91.7	108.3	2.42522e+07	2.8667e+07		High	High	High	0	1.09e-06	3.95	43.09	Used
	TRUE	High	NYQEAKDVFLGTFLYEYAR		FALSE	5.52584e-05	0	1	1	4	NP_001003026.1	1	2327.13	0								No Quan Values	High	High	High	0.0001485	0.0002609	3.13		Not Used
	TRUE	High	NYQEAKDVFLGTFLYEYAR	1xDeamidated [N/Q]	FALSE	0.000114085	0	1	1	6	NP_001003026.1	1	2328.12	0								Not Reliable	High	High	High	0	3.268e-05	3.56		Not Used
	TRUE	High	SQCLAEVERDELPGDLPSLAADFVEDKEVCK	2xCarbamidomethyl [C3; C30]	FALSE	0.00135722	0	1	2	2	NP_001003026.1	2	3519.66	0	0.925	0.978327	0	103.9	96.1	1398969	1294603		High	High	High	0	0.0001187	3.98	89.73	Used
	TRUE	High	SQCLAEVERDELPGDLPSLAADFVEDKEVCK	2xCarbamidomethyl [C3; C30]; 1xDeamidated [Q2]	FALSE	0.00024194	0	1	2	2	NP_001003026.1	2	3520.65	0								No Quan Values	High	High	High	0	2.854e-05	3.93		Not Used
	TRUE	High	SEIAHRYNDLGEEHFR		FALSE	0.000537718	0	1	2	2	NP_001003026.1	1	1972.93	0	1.287	0.968246	0	87.5	112.5	254495	327474		High	High	High	0	5.621e-05	2.57	24.73	Used
	TRUE	High	SEIAHRYNDLGEEHFR	1xDeamidated [N8]	FALSE	0.000476534	0	1	2	4	NP_001003026.1	1	1973.91	0	1.205	0.969982	0	90.7	109.3	587104	707414		High	High	High	0.0001485	0.0003013	2.89	27.56	Used
	TRUE	High	TVMGDFGAFVEK	1xOxidation [M3]	FALSE	0.00070801	0	1	2	5	NP_001003026.1	0	1316.62	0	1.306	0.934283	0	86.7	113.3	7.34373e+06	9593995		High	High	High	0	7.058e-05	3.16	41.88	Used
	TRUE	High	TNCELFEKLGEYGFQNALLVR	1xCarbamidomethyl [C3]	FALSE	5.90949e-05	0	1	2	1	NP_001003026.1	1	2501.25	0	0.685	0.89828	0	118.7	81.3	793756	543964		High	Peak Found	High	0	8.555e-06	4.04	91.8	Used
	TRUE	High	TNCELFEKLGEYGFQNALLVR	1xCarbamidomethyl [C3]; 1xDeamidated [N/Q]	FALSE	0.000136753	0	1	2	4	NP_001003026.1	1	2502.23	0								No Quan Values	High	Not Found	High	0	1.812e-05	4.61		Not Used
	TRUE	High	MSCAEDFLSVVLNR	1xCarbamidomethyl [C3]	FALSE	0.000111063	0	1	1	1	NP_001003026.1	0	1640.78	0	0.886	0.9743	0	106.1	93.9	520507	461058		High	Peak Found	High	0	1.468e-05	2.51	91.06	Used
	TRUE	High	MSCAEDFLSVVLNR	1xCarbamidomethyl [C3]; 1xOxidation [M1]	FALSE	4.31161e-06	0	1	1	4	NP_001003026.1	0	1656.77	0	1.143	0.9743	0	93.3	106.7	3.15474e+06	3605096		High	High	High	0	1.134e-06	3.33	85.76	Used
	TRUE	High	DVFLGTFLYEYAR		FALSE	1.34061e-05	0	1	1	5	NP_001003026.1	0	1593.79	0	1.046	0.990583	0	97.7	102.3	3.83888e+06	4.01629e+06		High	High	High	0	2.377e-06	3.92	96.36	Used
	TRUE	High	EFNAETFTFHADLCTLPEAEK	1xCarbamidomethyl [C14]	FALSE	0.000476534	0	1	2	4	NP_001003026.1	0	2470.12	0	0.614	0.862374	0	123.9	76.1	1.5085e+06	925728		High	High	High	0.0001485	0.0002203	3.28	70.18	Used
	TRUE	High	GLVLVAFSQYLQQCPFEDHVK	1xCarbamidomethyl [C14]; 1xDeamidated [Q]	FALSE	1.71856e-05	0	1	2	19	NP_001003026.1	0	2479.23	0								Not Reliable	High	High	High	0	5.308e-06	4.46		Not Used
	TRUE	High	GLVLVAFSQYLQQCPFEDHVK	1xCarbamidomethyl [C14]	FALSE	2.52014e-06	0	1	2	6	NP_001003026.1	0	2478.25	0	0.968	0.991247	0	101.6	98.4	8.60557e+06	8.32958e+06		High	High	High	0	1.253e-05	3.53	98.41	Used
	TRUE	High	CCAAENKEGCFSEEGPK	3xCarbamidomethyl [C1; C2; C10]	FALSE	0.00633836	0.000480221	1	2	1	NP_001003026.1	1	1972.78	0	0.01	9.75497e-17		200		49015			High	Not Found	High	0.0001485	0.0003572	2.68	15.24	Used
	TRUE	High	YNDLGEEHFR		FALSE	0.00539774	0.000480221	1	2	2	NP_001003026.1	0	1279.57	0	0.426	0.655789	0	140.2	59.8	1.49305e+06	636448		High	Peak Found	High	0.0001485	0.0003158	2.11	21.01	Used
	TRUE	High	RPCFSGLEVDETYVPKEFNAETFTFHADLCTLPEAEK	2xCarbamidomethyl [C3; C30]; 1xDeamidated [N19]	FALSE	0.00465841	0.000480221	1	2	1	NP_001003026.1	1	4349.01	0								No Quan Values	High	Not Found	High	0.0001485	0.0002849	3.14		Not Used
	TRUE	High	RPCFSGLEVDETYVPK	1xCarbamidomethyl [C3]	FALSE	0.00633836	0.000480221	1	2	3	NP_001003026.1	0	1896.92	0	0.961	0.991149	0	102	98	4.1463e+06	3.98614e+06		High	High	High	0.00672	0.08556	2.92	47.59	Used
	TRUE	High	APQVSTPTLVEVSR		FALSE	0.00424149	0.000480221	1	2	5	NP_001003026.1	0	1483.81	0	1.087	0.977963	0	95.8	104.2	4.24291e+06	4.61082e+06		High	High	High	0.0008633	0.01048	2.12	37.12	Used
	TRUE	High	EFNAETFTFHADLCTLPEAEK	1xCarbamidomethyl [C14]; 1xDeamidated [N3]	FALSE	0.00659801	0.000480221	1	2	2	NP_001003026.1	0	2471.11	0								No Quan Values	Not Found	High	High	0.0001485	0.0005688	1.79		Not Used
	TRUE	High	VLDEFKPLVDEPQNLVK	1xDeamidated [Q/N]	FALSE	0.00331034	0.000480221	1	2	2	NP_001003026.1	0	1984.06	0								Not Reliable	High	Not Found	High	0.0001485	0.0002318	2.98		Not Used
	TRUE	High	LAKEYEATLEK		FALSE	0.00450501	0.000480221	1	2	1	NP_001003026.1	1	1294.69	0	0.417	0.654974	0	141.1	58.9	206029	85900.3		High	Peak Found	High	0.0001485	0.0002788	3.24	18.15	Used
	TRUE	High	LCVLHEKTPVSER	1xCarbamidomethyl [C2]	FALSE	0.00291461	0.000480221	1	2	4	NP_001003026.1	1	1567.83	0	0.597	0.852006	0	125.2	74.8	718325	428967		High	High	High	0.009946	0.1305	1.97	19.44	Used
	TRUE	High	HPYFYAPELLYYAQQYK		FALSE	0.00353973	0.000480221	1	2	4	NP_001003026.1	0	2194.06	0	0.659	0.888223	0	120.5	79.5	890575	587023		High	High	High	0.0001485	0.0002367	2.65	86.88	Used
	TRUE	High	LVAAAQAALV		FALSE	0.00629609	0.000480221	1	2	5	NP_001003026.1	0	926.567	0	1.674	0.852006	0	74.8	125.2	8.46287e+06	1.41648e+07		High	High	High	0.0001485	0.0003983	2.21	36.74	Used
	TRUE	High	SLHTLFGDKLCTVASLR	1xCarbamidomethyl [C11]	FALSE	0.00795698	0.000480221	1	2	6	NP_001003026.1	1	1918.02	0	0.959	0.991149	0	102.1	97.9	3.1428e+06	3.01332e+06		High	High	High	0.0001485	0.000429	3.01	58.53	Used
	TRUE	High	ADFAEISK		FALSE	0.0334467	0.000865703	1	2	1	NP_001003026.1	0	880.441	0	0.462	0.724404	0	136.8	63.2	121041	55944.3		High	Peak Found	High	0.0002602	0.002465	2.11	20.02	Used
	TRUE	High	HPYFYAPELLYYAQQYK	1xDeamidated [Q]	FALSE	0.0388958	0.00101489	1	2	6	NP_001003026.1	0	2195.05	0								Not Reliable	High	High	High	0.002442	0.02808	2.36		Not Used
	TRUE	High	TVMGDFGAFVEK		FALSE	0.0881902	0.00382875	1	2	2	NP_001003026.1	0	1300.62	0	0.81	0.95461	0	110.5	89.5	851974	689897		High	High	High	0.002299	0.02694	2.66	58.36	Used
	TRUE	High	GVFAECCQAADK	2xCarbamidomethyl [C6; C7]	FALSE	0.0881902	0.00382875	1	2	1	NP_001003026.1	0	1355.57	0								No Quan Values	High	Not Found	High	0.001292	0.01411	2.16		Not Used
TRUE	High	Master Protein	XP_535424.1	actin, alpha cardiac muscle 1 [Canis lupus familiaris]	0	FALSE	269.394	56	24	296	2	1	377	42	5.39	593.4	24	4	1.367	0.991737	40.32	94.7	105.3	39947539	4.44242e+07	High	High
	Checked	Confidence	Sequence	Modifications	Contaminant	Qvality PEP	Qvality q-value	# Protein Groups	# Proteins	# PSMs	Master Protein Accessions	# Missed Cleavages	Theo. MH+ [Da]	# Razor Quan Results	Abundance Ratio: (F4, Sample) / (F3, Control)	Abundance Ratio Adj. P-Value: (F4, Sample) / (F3, Control)	Abundance Ratio Variability [%]: (F4, Sample) / (F3, Control)	Abundances (Grouped): F3, Control	Abundances (Grouped): F4, Sample	Abundance: F3: Control	Abundance: F4: Sample	Quan Info	Found in Sample: [S3] F3: Control	Found in Sample: [S4] F4: Sample	Confidence (by Search Engine): Sequest HT	Percolator q-Value (by Search Engine): Sequest HT	Percolator PEP (by Search Engine): Sequest HT	XCorr (by Search Engine): Sequest HT	Top Apex RT [min]	Quan Usage
	TRUE	High	MTQIMFETFNVPAMYVAIQAVLSLYASGR	1xDeamidated [Q19]; 2xOxidation [M5; M]	FALSE	0.00159423	0	2	4	3	XP_005618896.1; XP_535424.1	0	3284.6	0								No Quan Values	High	High	High	0	0.0001343	3.32		Not Used
	TRUE	High	YPIEHGIITNWDDMEKIWHHTFYNELR	1xDeamidated [N]; 1xOxidation [M14]	FALSE	0.000333901	0	2	2	10	XP_005618896.1; XP_535424.1	1	3474.62	0								No Quan Values	High	High	High	0	4.378e-05	4.58		Not Used
	TRUE	High	YPIEHGIITNWDDMEKIWHHTFYNELR	1xOxidation [M14]	FALSE	9.84476e-06	0	2	2	9	XP_005618896.1; XP_535424.1	1	3473.64	0	0.905	0.975798	0	105	95	2.42364e+07	2.19433e+07	Shared	High	High	High	0	1.824e-06	4.08	72.93	Used
	TRUE	High	YPIEHGIITNWDDMEK		FALSE	0.00107323	0	2	4	3	XP_005618896.1; XP_535424.1	0	1960.91	0	1.739	0.835662	0	73	127	1.18265e+06	2.05648e+06	Shared	High	High	High	0.0007517	0.009453	2.49	52.46	Used
	TRUE	High	YPIEHGIITNWDDMEK	1xOxidation [M14]	FALSE	0.00232067	0.000331607	2	4	11	XP_005618896.1; XP_535424.1	0	1976.91	0	1.367	0.918705	0	84.5	115.5	1.45285e+07	1.98622e+07	Shared	High	High	High	0.000303	0.003124	3.11	43.02	Used
	TRUE	High	MTQIMFETFNVPAMYVAIQAVLSLYASGR	2xDeamidated [Q3; Q/N]; 2xOxidation [M5; M14]	FALSE	0.00205687	0.000331607	2	4	4	XP_005618896.1; XP_535424.1	0	3285.59	0								No Quan Values	High	High	High	0.002471	0.02999	3.45		Not Used
	TRUE	High	YPIEHGIITNWDDMEKIWHHTFYNELR	2xDeamidated [N10; N24]; 1xOxidation [M14]	FALSE	0.0134847	0.000480221	2	2	2	XP_005618896.1; XP_535424.1	1	3475.61	0								No Quan Values	High	High	High	0.0001485	0.0007159	2.81		Not Used
	TRUE	High	LCYVALDFENEMATAASSSSLEK	1xCarbamidomethyl [C2]; 1xOxidation [M12]	FALSE	0.00311662	0.000480221	1	3	1	XP_535424.1	0	2552.15	0								Not Reliable	Not Found	High	High	0.0001485	0.0002171	2.52		Not Used
	TRUE	High	GYSFVTTAER		FALSE	0.00491477	0.000480221	2	4	2	XP_005618896.1; XP_535424.1	0	1130.55	0	100	9.75497e-17			200		562225	Shared	Not Found	High	High	0.0001485	0.0003423	1.51	28.9	Used
	TRUE	High	YPIEHGIITNWDDMEKIWHHTFYNELR	1xDeamidated [N10]	FALSE	0.0238869	0.000666919	2	2	2	XP_005618896.1; XP_535424.1	1	3458.63	0								No Quan Values	High	Not Found	High	0.0002019	0.001474	4.22		Not Used
	TRUE	High	EKLCYVALDFENEMATAASSSSLEK	1xCarbamidomethyl [C4]; 1xOxidation [M14]	FALSE	0.0454988	0.00101489	1	3	1	XP_535424.1	1	2809.29	0								Not Reliable	High	Not Found	High	0.000303	0.004161	2.43		Not Used
	TRUE	High	YPIEHGIITNWDDMEK	1xDeamidated [N10]	FALSE	0.0409862	0.00101489	2	4	1	XP_005618896.1; XP_535424.1	0	1961.89	0								Not Reliable	Not Found	High	High	0.000303	0.003449	1.66		Not Used
	TRUE	High	YPIEHGIITNWDDMEKIWHHTFYNELR	2xDeamidated [N10; N24]	FALSE	0.0653786	0.00177815	2	2	1	XP_005618896.1; XP_535424.1	1	3459.61	0								No Quan Values	High	Not Found	High	0.000528	0.008167	3.47		Not Used
	TRUE	High	YPIEHGIITNWDDMEK	1xDeamidated [N10]; 1xOxidation [M14]	FALSE	0.108428	0.00429596	2	4	4	XP_005618896.1; XP_535424.1	0	1977.89	0								Not Reliable	High	High	High	0.001527	0.02038	2.62		Not Used
TRUE	High	Master Protein	XP_005629425.1	fibrinogen gamma chain isoform X1 [Canis lupus familiaris]	0	FALSE	264.23	52	19	280	19	1	445	50.3	6.14	580.34	19	0	1.75	0.955956	56.85	81.3	118.7	2.57933e+08	3.76316e+08	High	High
	Checked	Confidence	Sequence	Modifications	Contaminant	Qvality PEP	Qvality q-value	# Protein Groups	# Proteins	# PSMs	Master Protein Accessions	# Missed Cleavages	Theo. MH+ [Da]	# Razor Quan Results	Abundance Ratio: (F4, Sample) / (F3, Control)	Abundance Ratio Adj. P-Value: (F4, Sample) / (F3, Control)	Abundance Ratio Variability [%]: (F4, Sample) / (F3, Control)	Abundances (Grouped): F3, Control	Abundances (Grouped): F4, Sample	Abundance: F3: Control	Abundance: F4: Sample	Quan Info	Found in Sample: [S3] F3: Control	Found in Sample: [S4] F4: Sample	Confidence (by Search Engine): Sequest HT	Percolator q-Value (by Search Engine): Sequest HT	Percolator PEP (by Search Engine): Sequest HT	XCorr (by Search Engine): Sequest HT	Top Apex RT [min]	Quan Usage
	TRUE	High	IHLISTQSAIPYALR		FALSE	3.31854e-06	0	1	2	16	XP_005629425.1	0	1682.96	0	0.895	0.9743	0	105.5	94.5	2.66333e+07	2.3849e+07		High	High	High	0	7.132e-07	3.32	55.77	Used
	TRUE	High	IQLEDWNGR	1xDeamidated [N7]	FALSE	0.00153136	0	1	2	6	XP_005629425.1	0	1131.54	0	1.25	0.950768	0	88.9	111.1	5.45369e+06	6.81971e+06		High	High	High	0.0002019	0.001565	2.36	35.92	Used
	TRUE	High	KMMEEIIKYEALVGSHESNIR	2xOxidation [M2; M3]	FALSE	6.31977e-05	0	1	2	3	XP_005629425.1	2	2509.24	0	1.264	0.947226	0	88.3	111.7	6.57168e+06	8.30562e+06		High	Peak Found	High	0	9.031e-06	4.24	45.43	Used
	TRUE	High	RLDGSLDFKK		FALSE	0.000602696	0	1	2	7	XP_005629425.1	2	1178.65	0	7.386	0.0361735	0	23.8	176.2	1.62975e+06	1.20371e+07		High	High	High	0.0001485	0.0002254	2.56	20.58	Used
	TRUE	High	QQFLVYCEIDGSGNGWTVLQK	1xCarbamidomethyl [C7]; 2xDeamidated [Q1; N14]	FALSE	3.06172e-06	0	1	2	2	XP_005629425.1	0	2444.14	0								Not Reliable	High	High	High	0	6.649e-07	4.27		Not Used
	TRUE	High	QQFLVYCEIDGSGNGWTVLQK	1xCarbamidomethyl [C7]; 1xDeamidated [Q/N]	FALSE	0.000190007	0	1	2	6	XP_005629425.1	0	2443.16	0	1.324	0.929628	0	86.1	113.9	726065	961306		High	High	High	0	2.323e-05	3.76	80.01	Used
	TRUE	High	QQFLVYCEIDGSGNGWTVLQK	1xCarbamidomethyl [C7]	FALSE	9.0199e-05	0	1	2	3	XP_005629425.1	0	2442.18	0								No Quan Values	High	High	High	0	1.227e-05	3.74		Not Used
	TRUE	High	SIQITYNPDEPPKPNR		FALSE	2.14469e-05	0	1	2	32	XP_005629425.1	0	1868.95	0	1.435	0.902642	0	82.1	117.9	9.98679e+07	1.43316e+08		High	High	High	0.0001092	0.0001743	3.98	31.5	Used
	TRUE	High	SIQITYNPDEPPKPNR	1xDeamidated [N]	FALSE	8.95956e-05	0	1	2	11	XP_005629425.1	0	1869.93	0								Not Reliable	High	High	High	0	1.222e-05	3.97		Not Used
	TRUE	High	TSTPNGYDNGIIWATWQSR	1xDeamidated [N]	FALSE	8.15597e-05	0	1	2	10	XP_005629425.1	0	2168	0	1.986	0.758432	0	67	133	868157	1.72374e+06		High	High	High	0	1.13e-05	3.38	72.61	Used
	TRUE	High	TSTPNGYDNGIIWATWQSR	2xDeamidated [N9; N/Q]	FALSE	0.00023239	0	1	2	4	XP_005629425.1	0	2168.99	0								Not Reliable	High	High	High	0	5.091e-05	4.02		Not Used
	TRUE	High	TSTPNGYDNGIIWATWQSR		FALSE	0.000129603	0	1	2	5	XP_005629425.1	0	2167.02	0	1.9	0.787106	0	69	131	1.33114e+06	2529094		High	High	High	0	1.677e-05	3.18	71.36	Used
	TRUE	High	MMEEIIKYEALVGSHESNIR		FALSE	2.76907e-07	0	1	2	1	XP_005629425.1	1	2349.16	0	0.01	9.75497e-17		200		548349			High	Not Found	High	0	8.369e-08	4.77	68.19	Used
	TRUE	High	MMEEIIKYEALVGSHESNIR	1xDeamidated [N18]	FALSE	0.000977018	0	1	2	1	XP_005629425.1	1	2350.14	0								No Quan Values	High	Not Found	High	0	9.146e-05	2.87		Not Used
	TRUE	High	MMEEIIKYEALVGSHESNIR	1xOxidation [M]	FALSE	0.00011032	0	1	2	6	XP_005629425.1	1	2365.15	0	0.912	0.977963	0	104.6	95.4	942196	859085		High	High	High	0	1.46e-05	3.66	55.56	Used
	TRUE	High	MMEEIIKYEALVGSHESNIR	1xDeamidated [N18]; 1xOxidation [M]	FALSE	0.000376775	0	1	2	6	XP_005629425.1	1	2366.14	0								Not Reliable	High	High	High	0.0001092	0.0001871	3.68		Not Used
	TRUE	High	MMEEIIKYEALVGSHESNIR	2xOxidation [M1; M2]	FALSE	0.000400234	0	1	2	2	XP_005629425.1	1	2381.15	0	1.432	0.902642	0	82.2	117.8	3.34464e+06	4790420		High	High	High	0	4.387e-05	3.65	51.24	Used
	TRUE	High	CHAGHLNGVYYQGGVYSK	1xCarbamidomethyl [C1]; 2xDeamidated [N7; Q12]	FALSE	9.84476e-06	0	1	2	9	XP_005629425.1	0	2011.9	0								No Quan Values	High	High	High	0	2.768e-06	4.95		Not Used
	TRUE	High	CHAGHLNGVYYQGGVYSK	1xCarbamidomethyl [C1]; 1xDeamidated [N/Q]	FALSE	3.57442e-08	0	1	2	34	XP_005629425.1	0	2010.91	0	1.565	0.877459	0	78	122	1.80714e+07	2.8273e+07		High	High	High	0	2.817e-07	5.26	26.31	Used
	TRUE	High	CHAGHLNGVYYQGGVYSK	1xCarbamidomethyl [C1]	FALSE	1.46285e-05	0	1	2	12	XP_005629425.1	0	2009.93	0	1.707	0.843476	0	73.9	126.1	1.00542e+07	1.71586e+07		High	High	High	0	8.158e-06	4.21	24.85	Used
	TRUE	High	CQEPCKDTVHIHDTTGKDCQDIANK	3xCarbamidomethyl [C1; C5; C19]; 2xDeamidated [Q2; Q20]	FALSE	8.32187e-05	0	1	2	3	XP_005629425.1	2	2972.28	0	0.256	0.336451	0	159.2	40.8	120237	30777.4		High	High	High	0	1.147e-05	4.28	15.24	Used
	TRUE	High	FLLEIYNSNSQK	1xDeamidated [N/Q]	FALSE	0.000151238	0	1	2	13	XP_005629425.1	0	1456.73	0	3.503	0.340919	0	44.4	155.6	539230	1.88868e+06		High	High	High	0	4.461e-05	3.16	55.04	Used
	TRUE	High	FLLEIYNSNSQK		FALSE	3.34013e-05	0	1	2	9	XP_005629425.1	0	1455.75	0	1.348	0.922294	0	85.2	114.8	14232474	19179816		High	High	High	0	5.213e-06	3.57	52.96	Used
	TRUE	High	CQEPCKDTVHIHDTTGKDCQDIANK	3xCarbamidomethyl [C1; C5; C19]	FALSE	3.38605e-06	0	1	2	17	XP_005629425.1	2	2970.31	0	2.331	0.659943	0	60	140	4.17503e+06	9.73212e+06		High	High	High	0	1.628e-05	5.4	14.63	Used
	TRUE	High	CQEPCKDTVHIHDTTGKDCQDIANK	3xCarbamidomethyl [C1; C5; C19]; 1xDeamidated [Q/N]	FALSE	7.37654e-06	0	1	2	19	XP_005629425.1	2	2971.3	0	3.009	0.654974	0	49.9	150.1	20648.8	62124.3		High	High	High	0	6.567e-05	4.58	16.03	Used
	TRUE	High	EGFGHLSPTGTTEFWLGNEK		FALSE	4.76723e-05	0	1	2	8	XP_005629425.1	0	2207.04	0	1.133	0.9743	0	93.8	106.2	8.50556e+06	9.63939e+06		High	High	High	0	1.819e-05	3.38	65.76	Used
	TRUE	High	EGFGHLSPTGTTEFWLGNEK	1xDeamidated [N18]	FALSE	1.83787e-05	0	1	2	2	XP_005629425.1	0	2208.02	0								Not Reliable	High	High	High	0	3.118e-06	4.25		Not Used
	TRUE	High	EGFGHLSPTGTTEFWLGNEKIHLISTQSAIPYALR	1xDeamidated [N18]	FALSE	4.05791e-05	0	1	2	1	XP_005629425.1	1	3871.97	0	0.01	9.75497e-17		200		976684			High	Not Found	High	0	6.18e-06	4.74	89.42	Used
	TRUE	High	DTVHIHDTTGKDCQDIANK	1xCarbamidomethyl [C13]	FALSE	0.000224721	0	1	2	2	XP_005629425.1	1	2168	0	9.663	0.0616385	0	18.8	181.2	11323	109420		High	High	High	0.0001092	0.0001782	2.63	13.74	Used
	TRUE	High	ESGLYFIKPLK		FALSE	0.000329449	0	1	2	5	XP_005629425.1	0	1294.74	0	1.025	0.992464	0	98.8	101.2	3.41594e+07	3.50052e+07		High	High	High	0	4.286e-05	2.66	47.81	Used
	TRUE	High	AKQQFLVYCEIDGSGNGWTVLQK	1xCarbamidomethyl [C9]	FALSE	0.000877575	0	1	2	1	XP_005629425.1	1	2641.31	0								No Quan Values	High	Not Found	High	0	8.413e-05	1.84		Not Used
	TRUE	High	IQLEDWNGR		FALSE	0.00238374	0.000331607	1	2	7	XP_005629425.1	0	1130.56	0	1.795	0.821	0	71.6	128.4	16144305	2.89745e+07		High	High	High	0.0001485	0.000275	2.45	34.97	Used
	TRUE	High	TSTADYAMFK		FALSE	0.0034693	0.000480221	1	2	2	XP_005629425.1	0	1134.51	0	9.362	0.0133304	0	19.3	180.7	862123	8.0714e+06		High	High	High	0.002471	0.03091	2.04	31.06	Used
	TRUE	High	TSTADYAMFK	1xOxidation [M8]	FALSE	0.00305459	0.000480221	1	2	3	XP_005629425.1	0	1150.51	0	4.775	0.157312	0	34.6	165.4	371186	1.77238e+06		High	High	High	0.001527	0.02018	2.32	22.52	Used
	TRUE	High	LTIGEGQQHHLGGAK		FALSE	0.00356353	0.000480221	1	2	4	XP_005629425.1	0	1545.81	0	5.967	0.0783944	0	28.7	171.3	1.50547e+06	8.98238e+06		High	High	High	0.0001485	0.0002375	2.49	15.8	Used
	TRUE	High	LTIGEGQQHHLGGAK	1xDeamidated [Q7]	FALSE	0.0173685	0.000666919	1	2	2	XP_005629425.1	0	1546.8	0	7.207	0.0553685	0	24.4	175.6	106141	764938		High	High	High	0.0002019	0.0009636	1.52	17.05	Used
	TRUE	High	MMEEIIKYEALVGSHESNIR	1xDeamidated [N18]; 2xOxidation [M1; M2]	FALSE	0.0250199	0.000666919	1	2	1	XP_005629425.1	1	2382.13	0								Not Reliable	Not Found	High	High	0.0002019	0.001577	1.91		Not Used
	TRUE	High	KMMEEIIKYEALVGSHESNIR	1xDeamidated [N19]; 2xOxidation [M2; M3]	FALSE	0.0495158	0.00101489	1	2	2	XP_005629425.1	2	2510.23	0								Not Reliable	High	High	High	0.00378	0.04846	2.5		Not Used
	TRUE	High	AKQQFLVYCEIDGSGNGWTVLQK	1xCarbamidomethyl [C9]; 1xDeamidated [N16]	FALSE	0.0849103	0.00326873	1	2	1	XP_005629425.1	1	2642.29	0								No Quan Values	High	Not Found	High	0.001074	0.01315	2.46		Not Used
	TRUE	High	NWIQYK		FALSE	0.132032	0.00674258	1	2	1	XP_005629425.1	0	851.441	0	9.218	0.0143287	0	19.6	180.4	160552	1.48001e+06		Peak Found	High	High	0.002442	0.02853	1.06	28.06	Used
	TRUE	High	DTVHIHDTTGKDCQDIANK	1xCarbamidomethyl [C13]; 1xDeamidated [Q14]	FALSE	0.158265	0.00784511	1	2	1	XP_005629425.1	1	2168.99	0								Not Reliable	Not Found	High	High	0.002806	0.03856	2.27		Not Used
TRUE	High	Master Protein	XP_005641475.1	moesin isoform X1 [Canis lupus familiaris]	0	FALSE	252.445	49	24	175	17	1	592	69.7	6.74	362.14	24	7	0.66	0.769439	13.56	117.2	82.8	9.5201e+07	6.72588e+07	High	High
	Checked	Confidence	Sequence	Modifications	Contaminant	Qvality PEP	Qvality q-value	# Protein Groups	# Proteins	# PSMs	Master Protein Accessions	# Missed Cleavages	Theo. MH+ [Da]	# Razor Quan Results	Abundance Ratio: (F4, Sample) / (F3, Control)	Abundance Ratio Adj. P-Value: (F4, Sample) / (F3, Control)	Abundance Ratio Variability [%]: (F4, Sample) / (F3, Control)	Abundances (Grouped): F3, Control	Abundances (Grouped): F4, Sample	Abundance: F3: Control	Abundance: F4: Sample	Quan Info	Found in Sample: [S3] F3: Control	Found in Sample: [S4] F4: Sample	Confidence (by Search Engine): Sequest HT	Percolator q-Value (by Search Engine): Sequest HT	Percolator PEP (by Search Engine): Sequest HT	XCorr (by Search Engine): Sequest HT	Top Apex RT [min]	Quan Usage
	TRUE	High	KTQEQLALEMAELTAR		FALSE	0.0004338	0	1	3	2	XP_005641475.1	1	1831.96	0								No Quan Values	High	Not Found	High	0	4.683e-05	2.57		Not Used
	TRUE	High	KTQEQLALEMAELTAR	1xOxidation [M10]	FALSE	1.71856e-05	0	1	3	3	XP_005641475.1	1	1847.95	0	1.451	0.900109	0	81.6	118.4	1.4819e+06	2.15082e+06		High	High	High	0	2.945e-06	3.83	40.2	Used
	TRUE	High	KTQEQLALEMAELTAR	1xDeamidated [Q]; 1xOxidation [M10]	FALSE	0.00107323	0	1	3	3	XP_005641475.1	1	1848.94	0								Not Reliable	High	High	High	0	9.842e-05	3.1		Not Used
	TRUE	High	IAQDLEMYGVNYFSIK		FALSE	7.94182e-06	0	1	3	1	XP_005641475.1	0	1890.93	0								No Quan Values	High	Not Found	High	0	1.511e-06	3.58		Not Used
	TRUE	High	IAQDLEMYGVNYFSIK	1xOxidation [M7]	FALSE	3.18755e-06	0	1	3	4	XP_005641475.1	0	1906.93	0	0.73	0.917227	0	115.6	84.4	3.82159e+06	2.78817e+06		High	High	High	0	6.878e-07	4.54	69.8	Used
	TRUE	High	IAQDLEMYGVNYFSIK	1xDeamidated [N/Q]; 1xOxidation [M7]	FALSE	2.03256e-05	0	1	3	4	XP_005641475.1	0	1907.91	0								Not Reliable	High	Not Found	High	0	9.554e-06	4.01		Not Used
	TRUE	High	TAMSTPHVAEPAENEQDEQDENGAEASADLRADAMAK	2xDeamidated [N/Q]; 2xOxidation [M3; M35]	FALSE	0.0001564	0	1	3	3	XP_005641475.1	1	3933.65	0								No Quan Values	High	High	High	0	1.977e-05	5.33		Not Used
	TRUE	High	TAMSTPHVAEPAENEQDEQDENGAEASADLRADAMAK	1xDeamidated [Q/N]; 2xOxidation [M3; M35]	FALSE	9.98002e-07	0	1	3	7	XP_005641475.1	1	3932.67	0								No Quan Values	High	High	High	0	3.98e-06	5.57		Not Used
	TRUE	High	TAMSTPHVAEPAENEQDEQDENGAEASADLR	3xDeamidated [Q16; N22; Q/N]; 1xOxidation [M3]	FALSE	1.75351e-05	0	1	3	4	XP_005641475.1	0	3331.37	0								No Quan Values	High	High	High	0	9.671e-06	3.35		Not Used
	TRUE	High	TAMSTPHVAEPAENEQDEQDENGAEASADLR		FALSE	5.45344e-06	0	1	3	1	XP_005641475.1	0	3312.42	0								No Quan Values	High	Not Found	High	0	1.092e-06	3.69		Not Used
	TRUE	High	TAMSTPHVAEPAENEQDEQDENGAEASADLR	2xDeamidated [N/Q]; 1xOxidation [M3]	FALSE	5.45584e-08	0	1	3	20	XP_005641475.1	0	3330.38	0	1.085	0.978327	0	95.9	104.1	2.53876e+06	2.75549e+06		High	High	High	0	1.71e-07	7.09	27.38	Used
	TRUE	High	TAMSTPHVAEPAENEQDEQDENGAEASADLR	1xDeamidated [Q/N]; 1xOxidation [M3]	FALSE	2.48763e-08	0	1	3	19	XP_005641475.1	0	3329.4	0	0.716	0.910449	0	116.6	83.4	8870487	6.34708e+06		High	High	High	0	1.043e-08	5.5	25.74	Used
	TRUE	High	TAMSTPHVAEPAENEQDEQDENGAEASADLR	1xOxidation [M3]	FALSE	7.42787e-07	0	1	3	3	XP_005641475.1	0	3328.41	0	0.7	0.902642	0	117.7	82.3	4653832	3.25654e+06		High	High	High	0	1.955e-07	4.25	25.75	Used
	TRUE	High	TAMSTPHVAEPAENEQDEQDENGAEASADLR	2xDeamidated [N14; N22]	FALSE	5.86995e-05	0	1	3	1	XP_005641475.1	0	3314.39	0								No Quan Values	Not Found	High	High	0	8.492e-06	3.54		Not Used
	TRUE	High	TAMSTPHVAEPAENEQDEQDENGAEASADLR	1xDeamidated [N/Q]	FALSE	2.78772e-07	0	1	3	2	XP_005641475.1	0	3313.4	0								No Quan Values	High	Not Found	High	0	8.397e-08	5.83		Not Used
	TRUE	High	TQEQLALEMAELTAR	1xOxidation [M9]	FALSE	2.43697e-06	0	1	3	5	XP_005641475.1	0	1719.86	0	0.711	0.907887	0	116.9	83.1	4.04074e+06	2.87261e+06		High	High	High	0	5.455e-07	4.27	44.98	Used
	TRUE	High	TQEQLALEMAELTAR	1xDeamidated [Q]	FALSE	0.00165968	0	1	3	2	XP_005641475.1	0	1704.85	0								No Quan Values	High	Not Found	High	0.0001485	0.0005554	2.74		Not Used
	TRUE	High	TQEQLALEMAELTAR		FALSE	5.94929e-05	0	1	3	1	XP_005641475.1	0	1703.86	0								No Quan Values	High	Not Found	High	0	8.595e-06	3.21		Not Used
	TRUE	High	EVWFFGLQYQDTK		FALSE	0.000251881	0	1	3	3	XP_005641475.1	0	1660.8	0	0.687	0.90237	0	118.5	81.5	564392	387946		High	High	High	0	6.942e-05	2.91	82.25	Used
	TRUE	High	VTTMDAELEFAIQPNTTGK	1xOxidation [M4]	FALSE	4.92994e-05	0	2	4	6	XP_022274049.1; XP_005641475.1	0	2082.01	0	0.726	0.915201	0	115.9	84.1	2.7356e+06	1.9857e+06	Shared	High	High	High	0	7.325e-06	3.89	51.26	Used
	TRUE	High	VTTMDAELEFAIQPNTTGK	1xDeamidated [Q/N]; 1xOxidation [M4]	FALSE	0.0001564	0	2	4	2	XP_022274049.1; XP_005641475.1	0	2082.99	0								Not Reliable	Not Found	High	High	0	1.971e-05	2.01		Not Used
	TRUE	High	APDFVFYAPR		FALSE	0.000767375	0	2	7	4	XP_022274049.1; XP_005641475.1	0	1182.59	0	0.635	0.877459	0	122.3	77.7	5464973	3471746	Shared	High	High	High	0	0.0001241	3.01	54.72	Used
	TRUE	High	EGILSDEIYCPPETAVLLASYAVQSK	1xCarbamidomethyl [C10]	FALSE	3.87165e-05	0	1	3	7	XP_005641475.1	0	2853.42	0	0.556	0.818899	0	128.5	71.5	6120413	3.4044e+06		High	High	High	0	2.589e-05	3.33	103	Used
	TRUE	High	ERQEAEEAKEALLQASR		FALSE	0.000297897	0	1	3	7	XP_005641475.1	2	1957.99	0	0.956	0.990583	0	102.3	97.7	1.72271e+07	1.6465e+07		High	High	High	0.0001485	0.0003657	3.43	32.91	Used
	TRUE	High	AKFYPEDVSEELIQDITQR	1xDeamidated [Q]	FALSE	9.0241e-07	0	1	3	5	XP_005641475.1	1	2282.12	0								No Quan Values	High	High	High	0	2.317e-07	3.51		Not Used
	TRUE	High	ALTSELANAR		FALSE	0.000944789	0	1	3	1	XP_005641475.1	0	1045.56	0	0.384	0.611175	0	144.5	55.5	154838	59480.2		High	Peak Found	High	0	8.895e-05	2.16	22.28	Used
	TRUE	High	FYPEDVSEELIQDITQR		FALSE	1.91383e-06	0	1	3	4	XP_005641475.1	0	2082	0	0.443	0.68286	0	138.6	61.4	3.23639e+06	1.43482e+06		High	High	High	0	4.438e-07	2.95	96.74	Used
	TRUE	High	FYPEDVSEELIQDITQR	1xDeamidated [Q]	FALSE	0.000158513	0	1	3	5	XP_005641475.1	0	2082.99	0								No Quan Values	High	High	High	0	1.996e-05	3.04		Not Used
	TRUE	High	AKFYPEDVSEELIQDITQR		FALSE	7.13308e-06	0	1	3	5	XP_005641475.1	1	2281.13	0	0.287	0.343203	0	155.5	44.5	5181221	1.48447e+06		High	High	High	0	0.0001467	3.11	89.27	Used
	TRUE	High	EGILSDEIYCPPETAVLLASYAVQSK	1xCarbamidomethyl [C10]; 1xDeamidated [Q24]	FALSE	0.00260076	0.000331607	1	3	8	XP_005641475.1	0	2854.41	0								No Quan Values	High	High	High	0.0001485	0.0003137	3.26		Not Used
	TRUE	High	TAMSTPHVAEPAENEQDEQDENGAEASADLRADAMAK	2xOxidation [M3; M35]	FALSE	0.00764406	0.000480221	1	3	2	XP_005641475.1	1	3931.68	0	0.892	0.9743	0	105.7	94.3	2459217	2.1947e+06		High	High	High	0.0001485	0.0004149	3.43	30.77	Used
	TRUE	High	QEAEEAKEALLQASR		FALSE	0.00584923	0.000480221	1	3	3	XP_005641475.1	1	1672.85	0	0.521	0.781136	0	131.5	68.5	2.88164e+06	1.50019e+06		High	High	High	0.0001485	0.000668	2.85	30.76	Used
	TRUE	High	GSELWLGVDALGLNIYEQNDRLTPK	1xDeamidated [N/Q]	FALSE	0.0126992	0.000480221	1	3	4	XP_005641475.1	1	2802.43	0								No Quan Values	High	Not Found	High	0.0001485	0.0006698	2.88		Not Used
	TRUE	High	KAPDFVFYAPR		FALSE	0.00729445	0.000480221	2	7	5	XP_022274049.1; XP_005641475.1	1	1310.69	0	0.601	0.852006	0	124.9	75.1	6.17377e+06	3.70987e+06	Shared	High	High	High	0.0001485	0.0003981	2.82	45.65	Used
	TRUE	High	SGYLAGDKLLPQR		FALSE	0.00368491	0.000480221	1	3	4	XP_005641475.1	1	1417.78	0	0.68	0.89828	0	119.1	80.9	7.22753e+06	4.91229e+06		High	High	High	0.0001485	0.0002428	2.83	34.12	Used
	TRUE	High	ERQEAEEAKEALLQASR	1xDeamidated [Q]	FALSE	0.0147052	0.000480221	1	3	2	XP_005641475.1	2	1958.98	0								No Quan Values	High	High	High	0.0001485	0.0007899	2.42		Not Used
	TRUE	High	IGFPWSEIR		FALSE	0.00337756	0.000480221	2	7	3	XP_022274049.1; XP_005641475.1	0	1104.58	0	0.66	0.888223	0	120.5	79.5	4.33315e+06	2858635	Shared	High	High	High	0.0001485	0.0002283	2.48	68.93	Used
	TRUE	High	ENEAVEWQQK		FALSE	0.0327933	0.000865703	1	3	1	XP_005641475.1	0	1260.59	0								No Quan Values	High	Not Found	High	0.0002602	0.002394	2.48		Not Used
	TRUE	High	ALTSELANARDESK		FALSE	0.0420719	0.00101489	1	3	1	XP_005641475.1	1	1504.76	0	0.254	0.288442	0	159.5	40.5	426777	108223		High	Peak Found	High	0.000303	0.00365	1.77	20.78	Used
	TRUE	High	LFFLQVK		FALSE	0.0369091	0.00101489	2	7	4	XP_022274049.1; XP_005641475.1	0	894.545	0	0.599	0.852006	0	125.1	74.9	2.93537e+06	1.7587e+06	Shared	High	Peak Found	High	0.003635	0.04705	1.74	59.42	Used
	TRUE	High	ILALCMGNHELYMR	1xCarbamidomethyl [C5]; 2xOxidation [M6; M13]	FALSE	0.0571047	0.00139497	2	5	2	XP_022274049.1; XP_005641475.1	0	1752.82	0	0.798	0.950007	0	111.2	88.8	888462	709284	Shared	High	Peak Found	High	0.009574	0.1226	2.39	36.46	Used
	TRUE	High	VLEQHKLNKDQWEER		FALSE	0.0601314	0.00139497	1	3	2	XP_005641475.1	2	1952	0	0.455	0.697424	0	137.5	62.5	845090	384312		High	High	High	0.003957	0.05258	2.2	17.54	Used
	TRUE	High	FVIKPIDK		FALSE	0.0738347	0.002533	2	7	1	XP_022274049.1; XP_005641475.1	0	959.592	0	0.25	0.260287	0	160	40	824687	206261	Shared	High	Peak Found	High	0.0008078	0.0102	1.62	26.49	Used
	TRUE	High	VLEQHKLNKDQWEER	1xDeamidated [Q4]	FALSE	0.156382	0.00751146	1	3	1	XP_005641475.1	2	1952.98	0	0.46	0.724326	0	137	63	113063	52025.6		Peak Found	High	High	0.00271	0.03769	2.47	18.97	Used
TRUE	High	Master Protein	XP_849434.1	fructose-bisphosphate aldolase A [Canis lupus familiaris]	0	FALSE	247.921	72	19	220	17	1	364	39.5	8.09	533.16	19	3	1.223	0.966879	39.77	88.1	111.9	2.63378e+08	3.34245e+08	High	High
	Checked	Confidence	Sequence	Modifications	Contaminant	Qvality PEP	Qvality q-value	# Protein Groups	# Proteins	# PSMs	Master Protein Accessions	# Missed Cleavages	Theo. MH+ [Da]	# Razor Quan Results	Abundance Ratio: (F4, Sample) / (F3, Control)	Abundance Ratio Adj. P-Value: (F4, Sample) / (F3, Control)	Abundance Ratio Variability [%]: (F4, Sample) / (F3, Control)	Abundances (Grouped): F3, Control	Abundances (Grouped): F4, Sample	Abundance: F3: Control	Abundance: F4: Sample	Quan Info	Found in Sample: [S3] F3: Control	Found in Sample: [S4] F4: Sample	Confidence (by Search Engine): Sequest HT	Percolator q-Value (by Search Engine): Sequest HT	Percolator PEP (by Search Engine): Sequest HT	XCorr (by Search Engine): Sequest HT	Top Apex RT [min]	Quan Usage
	TRUE	High	IGEHTPSALAIMENANVLAR		FALSE	0.000103158	0	1	1	5	XP_849434.1	0	2107.1	0	1.293	0.937776	0	87.2	112.8	1.78873e+06	2.31334e+06		High	High	High	0	1.87e-05	3.89	70.26	Used
	TRUE	High	IGEHTPSALAIMENANVLAR	1xOxidation [M12]	FALSE	3.7205e-07	0	1	1	10	XP_849434.1	0	2123.09	0	0.776	0.938362	0	112.6	87.4	3.44173e+07	2.67082e+07		High	High	High	0	1.582e-06	4.29	45.05	Used
	TRUE	High	IGEHTPSALAIMENANVLAR	1xDeamidated [N]; 1xOxidation [M12]	FALSE	4.86533e-06	0	1	1	18	XP_849434.1	0	2124.08	0								Not Reliable	High	High	High	0.0001485	0.0005564	3.76		Not Used
	TRUE	High	VDKGVVPLAGTNGETTTQGLDGLSER	1xDeamidated [N/Q]	FALSE	0.000509611	0	1	1	5	XP_849434.1	1	2615.32	1	0.344	0.477676	0	148.8	51.2	4203951	1.44631e+06		High	High	High	0.0001092	0.0001802	4.06	44.42	Used
	TRUE	High	VDKGVVPLAGTNGETTTQGLDGLSER		FALSE	0.000349962	0	1	1	2	XP_849434.1	1	2614.33	0	0.611	0.859378	0	124.2	75.8	3.36342e+06	2.05468e+06		High	High	High	0	3.919e-05	4.1	42.93	Used
	TRUE	High	GVVPLAGTNGETTTQGLDGLSER		FALSE	3.40885e-06	0	1	1	10	XP_849434.1	0	2272.14	0	0.895	0.9743	0	105.6	94.4	10314112	9.22815e+06		High	High	High	0	8.069e-05	4.14	47.23	Used
	TRUE	High	GVVPLAGTNGETTTQGLDGLSER	1xDeamidated [N/Q]	FALSE	2.24886e-07	0	1	1	19	XP_849434.1	0	2273.13	2	0.764	0.933592	0	113.4	86.6	1.09865e+07	8.38899e+06		High	High	High	0	1.423e-06	4.49	49.21	Used
	TRUE	High	GVVPLAGTNGETTTQGLDGLSER	2xDeamidated [N9; Q15]	FALSE	2.74931e-05	0	1	1	6	XP_849434.1	0	2274.11	0								No Quan Values	High	High	High	0	7.576e-06	5.06		Not Used
	TRUE	High	RTVPPAVTGITFLSGGQSEEEASINLNAINK		FALSE	0.000957551	0	1	1	1	XP_849434.1	1	3213.68	0								No Quan Values	Not Found	High	High	0	9.022e-05	1.91		Not Used
	TRUE	High	RTVPPAVTGITFLSGGQSEEEASINLNAINK	1xDeamidated [Q17]	FALSE	0.000703275	0	1	1	2	XP_849434.1	1	3214.66	0								No Quan Values	High	High	High	0	7.009e-05	3.71		Not Used
	TRUE	High	TDDGRPFPQVIK		FALSE	0.000698572	0	1	1	6	XP_849434.1	0	1372.72	0	1.776	0.825073	0	72.1	127.9	3.92781e+07	69747546		High	High	High	0	6.954e-05	2.09	30.02	Used
	TRUE	High	QLLLTADDRVNPCIGGVILFHETLYQK	1xCarbamidomethyl [C13]	FALSE	3.95132e-06	0	1	1	6	XP_849434.1	1	3113.65	0	0.336	0.461879	0	149.6	50.4	6.35021e+06	2136830		High	High	High	0	8.279e-07	5.83	85.77	Used
	TRUE	High	QLLLTADDRVNPCIGGVILFHETLYQK	1xCarbamidomethyl [C13]; 1xDeamidated [N/Q]	FALSE	1.20409e-05	0	1	1	9	XP_849434.1	1	3114.63	0	100	9.75497e-17			200		1.36382e+06		High	High	High	0	2.985e-06	5.7	86.15	Used
	TRUE	High	TVPPAVTGITFLSGGQSEEEASINLNAINK	1xDeamidated [N/Q]	FALSE	2.46935e-05	0	1	1	19	XP_849434.1	0	3058.56	0	0.973	0.99208	0	101.4	98.6	1.1783e+06	1.14611e+06		High	High	High	0	1.528e-05	4.78	84.1	Used
	TRUE	High	TVPPAVTGITFLSGGQSEEEASINLNAINK		FALSE	4.8981e-06	0	1	1	12	XP_849434.1	0	3057.57	0	1.431	0.902642	0	82.3	117.7	1.80825e+07	2.58833e+07		High	High	High	0	9.977e-07	4.86	83.04	Used
	TRUE	High	IVAPGKGILAADESTGSIAK		FALSE	0.00126069	0	1	1	1	XP_849434.1	1	1898.06	0								No Quan Values	Not Found	High	High	0	0.0001121	3		Not Used
	TRUE	High	YTPSGQAGAAASESLFISNHAY	2xDeamidated [Q6; N19]	FALSE	0.000381867	0	1	1	2	XP_849434.1	0	2244.01	0								No Quan Values	High	High	High	0	5.243e-05	4.65		Not Used
	TRUE	High	YSHEEIAMATVTALR	1xOxidation [M8]	FALSE	1.13376e-06	0	1	1	7	XP_849434.1	0	1707.84	0	1.457	0.898424	0	81.4	118.6	2.99383e+07	4.36201e+07		High	High	High	0	2.826e-07	4.5	35.26	Used
	TRUE	High	YTPSGQAGAAASESLFISNHAY	1xDeamidated [N/Q]	FALSE	2.78772e-07	0	1	1	15	XP_849434.1	0	2243.03	0								No Quan Values	High	High	High	0	3.049e-07	5.37		Not Used
	TRUE	High	YTPSGQAGAAASESLFISNHAY		FALSE	1.18087e-08	0	1	1	11	XP_849434.1	0	2242.04	0	0.944	0.987506	0	102.9	97.1	16153736	15248928		High	High	High	0	5.504e-09	5.7	54.83	Used
	TRUE	High	YSHEEIAMATVTALRR	1xOxidation [M8]	FALSE	9.20338e-05	0	1	1	7	XP_849434.1	1	1863.94	0	1.223	0.959577	0	90	110	5.61218e+07	6.86227e+07		High	High	High	0	1.248e-05	2.89	35.16	Used
	TRUE	High	VNPCIGGVILFHETLYQK	1xCarbamidomethyl [C4]	FALSE	6.58105e-06	0	1	1	2	XP_849434.1	0	2088.09	0								No Quan Values	High	High	High	0	9.93e-05	2.94		Not Used
	TRUE	High	GILAADESTGSIAK		FALSE	6.62379e-05	0	1	1	10	XP_849434.1	0	1332.7	0	2.372	0.651217	0	59.3	140.7	1.53448e+07	3.63981e+07		High	High	High	0	6.446e-05	4.1	25.18	Used
	TRUE	High	GILAADESTGSIAKR		FALSE	0.000100425	0	1	1	3	XP_849434.1	1	1488.8	0	1.896	0.788526	0	69.1	130.9	637785	1.20896e+06		High	High	High	0	1.35e-05	3.46	22.39	Used
	TRUE	High	YASICQQNGIVPIVEPEILPDGDHDLKR	1xCarbamidomethyl [C5]; 1xDeamidated [N/Q]	FALSE	2.43642e-05	0	2	2	7	XP_022278285.1; XP_849434.1	1	3177.59	0	1.191	0.971875	0	91.3	108.7	4241805	5.05401e+06	Shared	High	High	High	0.000303	0.003621	3.59	67.67	Used
	TRUE	High	ALSDHHIYLEGTLLKPNMVTPGHACTHK	1xCarbamidomethyl [C25]; 1xOxidation [M18]	FALSE	0.000310138	0	1	1	2	XP_849434.1	0	3156.57	0	1.501	0.893446	0	80	120	6510410	9.77007e+06		High	High	High	0	3.525e-05	4.53	38.81	Used
	TRUE	High	ALSDHHIYLEGTLLKPNMVTPGHACTHK	1xCarbamidomethyl [C25]; 1xDeamidated [N17]; 1xOxidation [M18]	FALSE	0.00121911	0	1	1	4	XP_849434.1	0	3157.56	0								No Quan Values	High	High	High	0	0.0001343	3.82		Not Used
	TRUE	High	YSHEEIAMATVTALR		FALSE	0.00084295	0	1	1	2	XP_849434.1	0	1691.84	0								No Quan Values	High	High	High	0	8.141e-05	2.78		Not Used
	TRUE	High	VNPCIGGVILFHETLYQK	1xCarbamidomethyl [C4]; 1xDeamidated [N2]	FALSE	0.0065103	0.000480221	1	1	2	XP_849434.1	0	2089.08	0								No Quan Values	High	High	High	0.0001485	0.0003638	2.41		Not Used
	TRUE	High	YASICQQNGIVPIVEPEILPDGDHDLKR	1xCarbamidomethyl [C5]	FALSE	0.00491477	0.000480221	2	2	3	XP_022278285.1; XP_849434.1	1	3176.6	0	0.713	0.908943	0	116.8	83.2	3.85216e+06	2746281	Shared	High	High	High	0.003957	0.05277	2.52	66.24	Used
	TRUE	High	ALANSLACQGK	1xCarbamidomethyl [C8]	FALSE	0.0423477	0.00101489	1	1	2	XP_849434.1	0	1132.58	0	1.241	0.9743	0	89.3	110.7	120970	150096		High	High	High	0.000303	0.003691	2.36	16.17	Used
	TRUE	High	VDKGVVPLAGTNGETTTQGLDGLSER	2xDeamidated [N12; Q18]	FALSE	0.0625014	0.00158702	1	1	2	XP_849434.1	1	2616.3	0								Not Reliable	High	High	High	0.0004718	0.007504	2.42		Not Used
	TRUE	High	RLQSIGTENTEENRR	1xDeamidated [Q3]	FALSE	0.0701554	0.00215868	1	1	1	XP_849434.1	2	1803.89	0								Not Reliable	Not Found	High	High	0.0006972	0.009325	3.15		Not Used
	TRUE	High	YASICQQNGIVPIVEPEILPDGDHDLKR	1xCarbamidomethyl [C5]; 2xDeamidated [Q6; Q/N]	FALSE	0.0728982	0.00234546	2	2	3	XP_022278285.1; XP_849434.1	1	3178.57	0								Not Reliable	High	Not Found	High	0.0007517	0.009966	3.58		Not Used
	TRUE	High	VLAAVYK		FALSE	0.116788	0.00537309	2	4	1	XP_022278285.1; XP_849434.1	0	763.471	0	1.35	0.95461	0	85.1	114.9	144264	194801	Shared	High	Peak Found	High	0.002001	0.02324	1.54	17.97	Used
	TRUE	High	TDDGRPFPQVIK	1xDeamidated [Q9]	FALSE	0.128061	0.00640612	1	1	3	XP_849434.1	0	1373.71	0	2.332	0.659943	0	60	140	348960	813602		High	High	High	0.002299	0.02697	2.94	31.45	Used
TRUE	High	Master Protein	XP_532060.4	tubulin beta chain [Canis lupus familiaris]	0	FALSE	234.92	77	24	181	5	1	444	49.6	4.89	374.02	24	1	0.984	0.955956	35.5	87.8	112.2	1.47539e+07	1.88632e+07	High	High
	Checked	Confidence	Sequence	Modifications	Contaminant	Qvality PEP	Qvality q-value	# Protein Groups	# Proteins	# PSMs	Master Protein Accessions	# Missed Cleavages	Theo. MH+ [Da]	# Razor Quan Results	Abundance Ratio: (F4, Sample) / (F3, Control)	Abundance Ratio Adj. P-Value: (F4, Sample) / (F3, Control)	Abundance Ratio Variability [%]: (F4, Sample) / (F3, Control)	Abundances (Grouped): F3, Control	Abundances (Grouped): F4, Sample	Abundance: F3: Control	Abundance: F4: Sample	Quan Info	Found in Sample: [S3] F3: Control	Found in Sample: [S4] F4: Sample	Confidence (by Search Engine): Sequest HT	Percolator q-Value (by Search Engine): Sequest HT	Percolator PEP (by Search Engine): Sequest HT	XCorr (by Search Engine): Sequest HT	Top Apex RT [min]	Quan Usage
	TRUE	High	LHFFMPGFAPLTSR	1xOxidation [M5]	FALSE	0.000374255	0	4	8	7	XP_005635298.2; XP_532060.4; XP_005625117.1; XP_856151.2	0	1636.83	0	0.803	0.952941	0	110.9	89.1	10972373	8.81559e+06	Shared	High	High	High	0.0001092	0.0001823	3.43	65.68	Not Used
	TRUE	High	IMNTFSVVPSPK	1xOxidation [M2]	FALSE	5.60053e-05	0	2	5	4	XP_532060.4; XP_005625117.1	0	1335.7	0	0.841	0.971875	0	108.6	91.4	7.15908e+06	6.02135e+06	Shared	High	High	High	0.0001485	0.0007525	2.44	35.76	Not Used
	TRUE	High	ISEQFTAMFR	1xOxidation [M8]	FALSE	5.90949e-05	0	3	8	6	XP_532060.4; XP_005625117.1; XP_856151.2	0	1245.59	0	1.05	0.988634	0	97.6	102.4	5.43514e+06	5.70501e+06	Shared	High	High	High	0	8.546e-06	3.63	38.43	Not Used
	TRUE	High	SGPFGQIFRPDNFVFGQSGAGNNWAK		FALSE	1.06039e-07	0	3	6	4	XP_532060.4; XP_005625117.1; XP_856151.2	0	2798.34	0	0.774	0.937776	0	112.8	87.2	3.56232e+06	2.75598e+06	Shared	High	High	High	0	3.659e-08	5.35	85.17	Not Used
	TRUE	High	SGPFGQIFRPDNFVFGQSGAGNNWAK	1xDeamidated [N/Q]	FALSE	2.76907e-07	0	3	6	7	XP_532060.4; XP_005625117.1; XP_856151.2	0	2799.33	0								Not Reliable	High	High	High	0	8.342e-08	5.59		Not Used
	TRUE	High	SGPFGQIFRPDNFVFGQSGAGNNWAK	2xDeamidated [Q/N]	FALSE	0.000147232	0	3	6	2	XP_532060.4; XP_005625117.1; XP_856151.2	0	2800.31	0								Not Reliable	High	Not Found	High	0	1.87e-05	4.19		Not Used
	TRUE	High	MAVTFIGNSTAIQELFK	1xDeamidated [N/Q]; 1xOxidation [M1]	FALSE	1.82558e-05	0	1	2	2	XP_532060.4	0	1886.96	0								Not Reliable	Not Found	High	High	0	3.113e-06	2.14		Not Used
	TRUE	High	MAVTFIGNSTAIQELFKR	1xOxidation [M1]	FALSE	0.000262232	0	1	2	4	XP_532060.4	1	2042.07	0	0.798	0.94965	0	111.2	88.8	1.61385e+06	1.28765e+06		High	High	High	0	3.067e-05	2.9	82.38	Used
	TRUE	High	ISVYYNEATGGK		FALSE	0.000354691	0	1	1	3	XP_532060.4	0	1301.64	0	3.231	0.398848	0	47.3	152.7	2569822	8.30343e+06		High	High	High	0	3.953e-05	3.07	25.12	Used
	TRUE	High	LTTPTYGDLNHLVSATMSGVTTCLR	1xCarbamidomethyl [C23]; 1xOxidation [M17]	FALSE	0.00162663	0	3	6	3	XP_532060.4; XP_005625117.1; XP_856151.2	0	2724.33	0	0.854	0.971875	0	107.9	92.1	4.0589e+06	3.46624e+06	Shared	High	High	High	0	0.0001361	2.7	72.29	Not Used
	TRUE	High	NSSYFVEWIPNNVK	1xDeamidated [N1]	FALSE	0.000742058	0	4	10	1	XP_860433.2; XP_532060.4; XP_005625117.1; XP_856151.2	0	1697.82	0								Not Reliable	Not Found	High	High	0	7.326e-05	2.74		Not Used
	TRUE	High	MREIVHLQAGQCGNQIGAK	1xCarbamidomethyl [C12]; 1xDeamidated [Q/N]; 1xOxidation [M1]	FALSE	0.000167258	0	3	6	46	XP_532060.4; XP_005625117.1; XP_856151.2	1	2127.04	0	1.348	0.929628	0	85.2	114.8	366901	494675	Shared	High	High	High	0	3.861e-05	4.52	24.3	Not Used
	TRUE	High	MSMKEVDEQMLNVQNK	2xOxidation [M3; M]	FALSE	0.000159581	0	3	7	11	XP_532060.4; XP_005625117.1; XP_856151.2	1	1955.89	0	3.461	0.348904	0	44.8	155.2	737600	2.55313e+06	Shared	High	High	High	0	9.338e-05	3.39	25.33	Not Used
	TRUE	High	MREIVHLQAGQCGNQIGAK	1xCarbamidomethyl [C12]; 1xOxidation [M1]	FALSE	5.79432e-07	0	3	6	26	XP_532060.4; XP_005625117.1; XP_856151.2	1	2126.06	0	2.426	0.634348	0	58.4	141.6	5.17268e+06	1.25487e+07	Shared	High	High	High	0	1.583e-07	4.77	22.99	Not Used
	TRUE	High	EVDEQMLNVQNK		FALSE	0.000333901	0	3	7	2	XP_532060.4; XP_005625117.1; XP_856151.2	0	1446.69	0	2.398	0.641998	0	58.9	141.1	1.07121e+06	2.56866e+06	Shared	High	High	High	0	3.769e-05	3.77	26.29	Not Used
	TRUE	High	VSDTVVEPYNATLSVHQLVENTDETYCIDNEALYDICFR	2xCarbamidomethyl [C27; C37]; 3xDeamidated [N21; N30; N/Q]	FALSE	0.000772541	0	4	6	2	XP_860433.2; XP_532060.4; XP_005625117.1; XP_856151.2	0	4596.06	0								No Quan Values	High	Not Found	High	0	7.568e-05	3.08		Not Used
	TRUE	High	EAESCDCLQGFQLTHSLGGGTGSGMGTLLISK	2xCarbamidomethyl [C5; C7]; 1xDeamidated [Q]; 1xOxidation [M25]	FALSE	0.000258735	0	2	4	2	XP_532060.4; XP_005625117.1	0	3328.51	0								No Quan Values	High	High	High	0	3.031e-05	3.89		Not Used
	TRUE	High	EIVHLQAGQCGNQIGAK	1xCarbamidomethyl [C10]	FALSE	2.65857e-05	0	3	6	20	XP_532060.4; XP_005625117.1; XP_856151.2	0	1822.92	0	2.073	0.737591	0	65.1	134.9	3.37798e+06	7.00257e+06	Shared	High	High	High	0	4.305e-06	3.63	25.18	Not Used
	TRUE	High	GHYTEGAELVDSVLDVVRK		FALSE	0.000227758	0	3	6	5	XP_532060.4; XP_005625117.1; XP_856151.2	1	2087.08	0	0.608	0.85773	0	124.3	75.7	5.44537e+06	3.31284e+06	Shared	High	High	High	0	2.716e-05	3.73	81.66	Not Used
	TRUE	High	GHYTEGAELVDSVLDVVR		FALSE	1.62943e-07	0	3	6	6	XP_532060.4; XP_005625117.1; XP_856151.2	0	1958.98	0	0.729	0.917227	0	115.7	84.3	4.37495e+06	3.19068e+06	Shared	High	High	High	0	2.429e-07	4.17	86.01	Not Used
	TRUE	High	ALTVPELTQQVFDAK		FALSE	0.000271181	0	1	1	4	XP_532060.4	0	1659.9	0	0.74	0.922256	0	114.9	85.1	5340004	3.95356e+06		High	High	High	0	3.151e-05	3.05	73.61	Used
	TRUE	High	AILVDLEPGTMDSVR	1xOxidation [M11]	FALSE	1.61781e-05	0	2	4	4	XP_532060.4; XP_856151.2	0	1631.83	0	0.984	0.994173	0	100.8	99.2	4765582	4688321	Shared	High	High	High	0	2.794e-06	2.88	49.02	Used
	TRUE	High	YLTVAAVFR		FALSE	0.00191064	0.000331607	3	7	3	XP_860433.2; XP_532060.4; XP_005625117.1	0	1039.59	0	0.839	0.971875	0	108.8	91.2	6589266	5525644	Shared	High	High	High	0.0001092	0.0001536	2.15	55.6	Not Used
	TRUE	High	MAVTFIGNSTAIQELFK	1xOxidation [M1]	FALSE	0.00494779	0.000480221	1	2	2	XP_532060.4	0	1885.97	0	1.356	0.922256	0	84.9	115.1	464695	630203		High	High	High	0.0001485	0.0004376	2.5	88.21	Used
	TRUE	High	MREIVHLQAGQCGNQIGAK	1xCarbamidomethyl [C12]; 2xDeamidated [Q/N]; 1xOxidation [M1]	FALSE	0.00525511	0.000480221	3	6	4	XP_532060.4; XP_005625117.1; XP_856151.2	1	2128.03	0								Not Reliable	High	Not Found	High	0.0001485	0.0003106	3.93		Not Used
	TRUE	High	MSMKEVDEQMLNVQNK	1xDeamidated [Q/N]; 2xOxidation [M3; M10]	FALSE	0.00394021	0.000480221	3	7	4	XP_532060.4; XP_005625117.1; XP_856151.2	1	1956.87	0								Not Reliable	Not Found	High	High	0.0002019	0.000994	1.77		Not Used
	TRUE	High	MSMKEVDEQMLNVQNK	3xOxidation [M1; M3; M10]	FALSE	0.00307513	0.000480221	3	7	2	XP_532060.4; XP_005625117.1; XP_856151.2	1	1971.88	0	4.453	0.280549	0	36.7	163.3	79633.4	354593	Shared	High	High	High	0.0001485	0.0005395	2.95	15.87	Not Used
	TRUE	High	NSSYFVEWIPNNVK		FALSE	0.00315866	0.000480221	4	10	4	XP_860433.2; XP_532060.4; XP_005625117.1; XP_856151.2	0	1696.83	0	1.405	0.907898	0	83.2	116.8	1.52705e+06	2.14492e+06	Shared	High	High	High	0.0001485	0.0002965	2.51	70.43	Not Used
	TRUE	High	FWEVISDEHGIDPTGTYHGDSDLQLDR	1xDeamidated [Q24]	FALSE	0.00673178	0.000480221	1	1	1	XP_532060.4	0	3103.39	0								No Quan Values	High	Not Found	High	0.0001485	0.0003745	3.71		Not Used
	TRUE	High	VSDTVVEPYNATLSVHQLVENTDETYCIDNEALYDICFR	2xCarbamidomethyl [C27; C37]; 2xDeamidated [N/Q]	FALSE	0.0143184	0.000480221	4	6	3	XP_860433.2; XP_532060.4; XP_005625117.1; XP_856151.2	0	4595.08	0								No Quan Values	High	Not Found	High	0.0006972	0.009285	2.6		Not Used
	TRUE	High	ISEQFTAMFR		FALSE	0.00686826	0.000480221	3	8	1	XP_532060.4; XP_005625117.1; XP_856151.2	0	1229.6	0	1.342	0.929628	0	85.4	114.6	390488	523890	Shared	Peak Found	High	High	0.0001485	0.0003797	1.92	54.96	Not Used
	TRUE	High	LTTPTYGDLNHLVSATMSGVTTCLR	1xCarbamidomethyl [C23]; 1xDeamidated [N10]; 1xOxidation [M17]	FALSE	0.00714954	0.000480221	3	6	2	XP_532060.4; XP_005625117.1; XP_856151.2	0	2725.32	0								Not Reliable	High	Not Found	High	0.0001485	0.0003921	3.26		Not Used
	TRUE	High	LTTPTYGDLNHLVSATMSGVTTCLR	1xCarbamidomethyl [C23]; 1xDeamidated [N10]	FALSE	0.00326628	0.000480221	3	6	1	XP_532060.4; XP_005625117.1; XP_856151.2	0	2709.32	0								Not Reliable	High	Not Found	High	0.0001485	0.0002235	4.07		Not Used
	TRUE	High	EIVHIQAGQCGNQIGAK	1xCarbamidomethyl [C10]; 1xDeamidated [N/Q]	FALSE	0.00515061	0.000480221	3	6	10	XP_532060.4; XP_005625117.1; XP_856151.2	0	1823.91	0								No Quan Values	High	High	High	0.0001485	0.0003062	3.61		Not Used
	TRUE	High	EVDEQMLNVQNK	1xOxidation [M6]	FALSE	0.0126148	0.000480221	3	7	2	XP_532060.4; XP_005625117.1; XP_856151.2	0	1462.68	0								No Quan Values	High	High	High	0.0001485	0.0006664	1.83		Not Used
	TRUE	High	MSMKEVDEQMLNVQNK	1xOxidation [M10]	FALSE	0.047312	0.00101489	3	7	2	XP_532060.4; XP_005625117.1; XP_856151.2	1	1939.89	0	0.792	0.930056	0	111.6	88.4	164273	130116	Shared	High	Peak Found	High	0.000303	0.004461	2.71	28.67	Not Used
	TRUE	High	VSDTVVEPYNATLSVHQLVENTDETYCIDNEALYDICFR	2xCarbamidomethyl [C27; C37]; 1xDeamidated [N30]	FALSE	0.0449095	0.00101489	4	6	1	XP_860433.2; XP_532060.4; XP_005625117.1; XP_856151.2	0	4594.09	0								No Quan Values	High	Not Found	High	0.000303	0.004084	2.98		Not Used
	TRUE	High	MAVTFIGNSTAIQELFKR	1xDeamidated [N8]; 1xOxidation [M1]	FALSE	0.0881902	0.00382875	1	2	1	XP_532060.4	1	2043.06	0								Not Reliable	High	Not Found	High	0.001292	0.01414	2.68		Not Used
TRUE	High	Master Protein	XP_005618896.1	actin, alpha skeletal muscle [Canis lupus familiaris]	0	FALSE	232.713	49	21	218	2	1	377	42	5.85	416.43	21	0	0.01	2.25303e-16		200		1.1499e+06		High	Not Found
	Checked	Confidence	Sequence	Modifications	Contaminant	Qvality PEP	Qvality q-value	# Protein Groups	# Proteins	# PSMs	Master Protein Accessions	# Missed Cleavages	Theo. MH+ [Da]	# Razor Quan Results	Abundance Ratio: (F4, Sample) / (F3, Control)	Abundance Ratio Adj. P-Value: (F4, Sample) / (F3, Control)	Abundance Ratio Variability [%]: (F4, Sample) / (F3, Control)	Abundances (Grouped): F3, Control	Abundances (Grouped): F4, Sample	Abundance: F3: Control	Abundance: F4: Sample	Quan Info	Found in Sample: [S3] F3: Control	Found in Sample: [S4] F4: Sample	Confidence (by Search Engine): Sequest HT	Percolator q-Value (by Search Engine): Sequest HT	Percolator PEP (by Search Engine): Sequest HT	XCorr (by Search Engine): Sequest HT	Top Apex RT [min]	Quan Usage
	TRUE	High	MTQIMFETFNVPAMYVAIQAVLSLYASGR	1xDeamidated [Q19]; 2xOxidation [M5; M]	FALSE	0.00159423	0	2	4	3	XP_005618896.1; XP_535424.1	0	3284.6	0								No Quan Values	High	High	High	0	0.0001343	3.32		Not Used
	TRUE	High	YSVWIGGSILASLSTFQQMWITK	2xDeamidated [Q17; Q18]	FALSE	0.00171627	0	1	1	2	XP_005618896.1	0	2618.32	0								No Quan Values	High	Not Found	High	0	0.0001418	3.32		Not Used
	TRUE	High	YSVWIGGSILASLSTFQQMWITKQEYDEAGPSIVHR	2xDeamidated [Q18; Q24]; 1xOxidation [M19]	FALSE	0.00126917	0	1	1	1	XP_005618896.1	1	4116.01	0	0.01	9.75497e-17		200		1.1499e+06			High	Not Found	High	0	0.0001123	2.98	125.15	Used
	TRUE	High	YPIEHGIITNWDDMEKIWHHTFYNELR	1xDeamidated [N]; 1xOxidation [M14]	FALSE	0.000333901	0	2	2	10	XP_005618896.1; XP_535424.1	1	3474.62	0								No Quan Values	High	High	High	0	4.378e-05	4.58		Not Used
	TRUE	High	YPIEHGIITNWDDMEKIWHHTFYNELR	1xOxidation [M14]	FALSE	9.84476e-06	0	2	2	9	XP_005618896.1; XP_535424.1	1	3473.64	0	0.905	0.975798	0	105	95	2.42364e+07	2.19433e+07	Shared	High	High	High	0	1.824e-06	4.08	72.93	Not Used
	TRUE	High	YPIEHGIITNWDDMEK		FALSE	0.00107323	0	2	4	3	XP_005618896.1; XP_535424.1	0	1960.91	0	1.739	0.835662	0	73	127	1.18265e+06	2.05648e+06	Shared	High	High	High	0.0007517	0.009453	2.49	52.46	Not Used
	TRUE	High	YPIEHGIITNWDDMEK	1xOxidation [M14]	FALSE	0.00232067	0.000331607	2	4	11	XP_005618896.1; XP_535424.1	0	1976.91	0	1.367	0.918705	0	84.5	115.5	1.45285e+07	1.98622e+07	Shared	High	High	High	0.000303	0.003124	3.11	43.02	Not Used
	TRUE	High	MTQIMFETFNVPAMYVAIQAVLSLYASGR	2xDeamidated [Q3; Q/N]; 2xOxidation [M5; M14]	FALSE	0.00205687	0.000331607	2	4	4	XP_005618896.1; XP_535424.1	0	3285.59	0								No Quan Values	High	High	High	0.002471	0.02999	3.45		Not Used
	TRUE	High	YPIEHGIITNWDDMEKIWHHTFYNELR	2xDeamidated [N10; N24]; 1xOxidation [M14]	FALSE	0.0134847	0.000480221	2	2	2	XP_005618896.1; XP_535424.1	1	3475.61	0								No Quan Values	High	High	High	0.0001485	0.0007159	2.81		Not Used
	TRUE	High	GYSFVTTAER		FALSE	0.00491477	0.000480221	2	4	2	XP_005618896.1; XP_535424.1	0	1130.55	0	100	9.75497e-17			200		562225	Shared	Not Found	High	High	0.0001485	0.0003423	1.51	28.9	Not Used
	TRUE	High	YPIEHGIITNWDDMEKIWHHTFYNELR	1xDeamidated [N10]	FALSE	0.0238869	0.000666919	2	2	2	XP_005618896.1; XP_535424.1	1	3458.63	0								No Quan Values	High	Not Found	High	0.0002019	0.001474	4.22		Not Used
	TRUE	High	YSVWIGGSILASLSTFQQMWITKQEYDEAGPSIVHR	3xDeamidated [Q17; Q18; Q24]; 1xOxidation [M19]	FALSE	0.0488763	0.00101489	1	1	1	XP_005618896.1	1	4116.99	0								No Quan Values	High	Not Found	High	0.000303	0.004758	3		Not Used
	TRUE	High	YPIEHGIITNWDDMEK	1xDeamidated [N10]	FALSE	0.0409862	0.00101489	2	4	1	XP_005618896.1; XP_535424.1	0	1961.89	0								Not Reliable	Not Found	High	High	0.000303	0.003449	1.66		Not Used
	TRUE	High	YPIEHGIITNWDDMEKIWHHTFYNELR	2xDeamidated [N10; N24]	FALSE	0.0653786	0.00177815	2	2	1	XP_005618896.1; XP_535424.1	1	3459.61	0								No Quan Values	High	Not Found	High	0.000528	0.008167	3.47		Not Used
	TRUE	High	YPIEHGIITNWDDMEK	1xDeamidated [N10]; 1xOxidation [M14]	FALSE	0.108428	0.00429596	2	4	4	XP_005618896.1; XP_535424.1	0	1977.89	0								Not Reliable	High	High	High	0.001527	0.02038	2.62		Not Used
TRUE	High	Master Protein	XP_013974025.1	14-3-3 protein zeta/delta [Canis lupus familiaris]	0	FALSE	227.852	80	21	157	19	1	245	27.7	4.79	338.52	21	1	1.425	0.974301	70.33	97.4	102.6	2.00343e+08	2.10921e+08	High	High
	Checked	Confidence	Sequence	Modifications	Contaminant	Qvality PEP	Qvality q-value	# Protein Groups	# Proteins	# PSMs	Master Protein Accessions	# Missed Cleavages	Theo. MH+ [Da]	# Razor Quan Results	Abundance Ratio: (F4, Sample) / (F3, Control)	Abundance Ratio Adj. P-Value: (F4, Sample) / (F3, Control)	Abundance Ratio Variability [%]: (F4, Sample) / (F3, Control)	Abundances (Grouped): F3, Control	Abundances (Grouped): F4, Sample	Abundance: F3: Control	Abundance: F4: Sample	Quan Info	Found in Sample: [S3] F3: Control	Found in Sample: [S4] F4: Sample	Confidence (by Search Engine): Sequest HT	Percolator q-Value (by Search Engine): Sequest HT	Percolator PEP (by Search Engine): Sequest HT	XCorr (by Search Engine): Sequest HT	Top Apex RT [min]	Quan Usage
	TRUE	High	LGLALNFSVFYYEILNSPEK	1xDeamidated [N]	FALSE	0.000273007	0	2	2	2	XP_013974025.1; XP_852754.1	0	2318.2	0								No Quan Values	High	Not Found	High	0	3.165e-05	2.76		Not Used
	TRUE	High	LGLALNFSVFYYEILNSPEK		FALSE	0.00126917	0	2	2	2	XP_013974025.1; XP_852754.1	0	2317.21	0								No Quan Values	High	Not Found	High	0.0004148	0.00576	2.9		Not Used
	TRUE	High	IETELRDICNDVLSLLEK	1xCarbamidomethyl [C9]	FALSE	7.32544e-05	0	1	1	4	XP_013974025.1	1	2160.12	0	0.254	0.260495	0	159.5	40.5	9.82095e+06	2.49693e+06		High	High	High	0	1.026e-05	3.55	107.72	Used
	TRUE	High	LAEQAERYDDMAACMK	1xCarbamidomethyl [C14]	FALSE	0.00167085	0	1	1	2	XP_013974025.1	1	1901.82	0	1.761	0.857693	0	72.4	127.6	235295	414470		High	High	High	0.0002019	0.00121	2.67	30.73	Used
	TRUE	High	LAEQAERYDDMAACMK	1xCarbamidomethyl [C14]; 1xOxidation [M]	FALSE	1.31418e-06	0	1	1	7	XP_013974025.1	1	1917.81	0	1.784	0.822759	0	71.8	128.2	3.09305e+06	5.51861e+06		High	High	High	0	5.42e-07	4.3	21.41	Used
	TRUE	High	LAEQAERYDDMAACMK	1xCarbamidomethyl [C14]; 2xOxidation [M11; M15]	FALSE	0.000419485	0	1	1	16	XP_013974025.1	1	1933.81	0	2.101	0.726658	0	64.5	135.5	967060	2.03218e+06		High	High	High	0	4.563e-05	3.73	15.36	Used
	TRUE	High	LAEQAERYDDMAACMK	1xCarbamidomethyl [C14]; 1xDeamidated [Q4]; 2xOxidation [M11; M15]	FALSE	0.0013848	0	1	1	5	XP_013974025.1	1	1934.79	0								No Quan Values	High	High	High	0	0.0001204	2.97		Not Used
	TRUE	High	KGIVDQSQQAYQEAFEISK		FALSE	2.23333e-06	0	1	1	2	XP_013974025.1	1	2169.08	0								No Quan Values	High	Not Found	High	0	5.081e-07	4.05		Not Used
	TRUE	High	SVTEQGAELSNEER		FALSE	3.3634e-06	0	1	1	5	XP_013974025.1	0	1548.71	0	2.631	0.566287	0	55.1	144.9	419542	1.10365e+06		High	High	High	0	7.222e-07	4.21	15.9	Used
	TRUE	High	SVTEQGAELSNEER	1xDeamidated [Q5]	FALSE	3.5252e-06	0	1	1	3	XP_013974025.1	0	1549.7	0	8.704	0.0304338	0	20.6	179.4	86139.6	749794		High	High	High	0	7.498e-07	3.55	18.07	Used
	TRUE	High	TAFDEAIAELDTLSEESYKDSTLIMQLLR	1xDeamidated [Q26]; 1xOxidation [M25]	FALSE	1.26202e-05	0	1	1	7	XP_013974025.1	1	3319.61	0								No Quan Values	High	High	High	0	2.26e-06	4.9		Not Used
	TRUE	High	TAFDEAIAELDTLSEESYKDSTLIMQLLR	1xOxidation [M25]	FALSE	1.81417e-07	0	1	1	5	XP_013974025.1	1	3318.63	0	0.132	0.032561	0	176.7	23.3	40836223	5.37909e+06		High	High	High	0	9.841e-08	5.18	133.61	Used
	TRUE	High	TAFDEAIAELDTLSEESYK		FALSE	7.18271e-07	0	1	1	3	XP_013974025.1	0	2131.99	0	0.917	0.977963	0	104.3	95.7	1700005	1.55873e+06		High	High	High	0	1.903e-07	5.12	99.33	Used
	TRUE	High	DNLTLWTSDTQGDEAEAGEGGEN		FALSE	5.7956e-08	0	1	1	3	XP_013974025.1	0	2409	0	0.614	0.863482	0	123.9	76.1	2.05005e+06	1.25966e+06		High	High	High	0	2.162e-08	5.44	51.31	Used
	TRUE	High	DNLTLWTSDTQGDEAEAGEGGEN	1xDeamidated [Q11]	FALSE	9.39703e-08	0	1	1	3	XP_013974025.1	0	2409.98	0								No Quan Values	High	High	High	0	3.297e-08	5.17		Not Used
	TRUE	High	YLAEVAAGDDKK		FALSE	6.0703e-05	0	1	1	6	XP_013974025.1	1	1279.65	0	4.138	0.231509	0	38.9	161.1	754191	3.12113e+06		High	High	High	0	1.701e-05	2.95	15.16	Used
	TRUE	High	VVSSIEQKTEGAEK		FALSE	0.00179875	0	1	1	2	XP_013974025.1	1	1504.79	0	1.691	0.900109	0	74.3	125.7	69924.8	118228		High	High	High	0.0001092	0.0001531	2.65	13.27	Used
	TRUE	High	GIVDQSQQAYQEAFEISK	1xDeamidated [Q]	FALSE	2.01896e-05	0	1	1	23	XP_013974025.1	0	2041.97	0								No Quan Values	High	High	High	0	3.444e-06	4.97		Not Used
	TRUE	High	GIVDQSQQAYQEAFEISK		FALSE	8.61179e-08	0	1	1	8	XP_013974025.1	0	2040.99	0	0.988	0.995403	0	100.6	99.4	1.17825e+07	1.16439e+07		High	High	High	0	1.916e-07	5.59	57.74	Used
	TRUE	High	GIVDQSQQAYQEAFEISKK		FALSE	0.000374255	0	1	1	7	XP_013974025.1	1	2169.08	0	0.864	0.971875	0	107.3	92.7	2.01137e+07	1.73879e+07		High	High	High	0	4.146e-05	3.8	54.02	Used
	TRUE	High	GIVDQSQQAYQEAFEISKK	1xDeamidated [Q]	FALSE	0.000470181	0	1	1	6	XP_013974025.1	1	2170.07	0								No Quan Values	High	High	High	0.0001092	0.0001768	4.07		Not Used
	TRUE	High	DICNDVLSLLEK	1xCarbamidomethyl [C3]	FALSE	0.00011719	0	1	1	3	XP_013974025.1	0	1418.72	0	0.627	0.875146	0	122.9	77.1	4.53439e+06	2842544		High	High	High	0	1.536e-05	3.58	92.88	Used
	TRUE	High	YLAEVAAGDDKKGIVDQSQQAYQEAFEISK		FALSE	0.00301392	0.000480221	1	1	1	XP_013974025.1	2	3301.62	0								No Quan Values	High	Not Found	High	0.0001485	0.0002116	4.67		Not Used
	TRUE	High	AKLAEQAERYDDMAACMK	1xCarbamidomethyl [C16]; 2xOxidation [M13; M17]	FALSE	0.00833821	0.000480221	1	1	2	XP_013974025.1	2	2132.94	0	0.473	0.737591	0	135.8	64.2	491964	232791		High	High	High	0.0001485	0.0004465	2.51	17.9	Used
	TRUE	High	NLLSVAYK		FALSE	0.00629609	0.000480221	6	10	6	XP_013974025.1; XP_852754.1; XP_003433473.2; XP_022275295.1; XP_532871.1; XP_854358.1	0	907.525	0	1.715	0.839574	0	73.7	126.3	2.62918e+07	4.50904e+07	Shared	High	High	High	0.0001485	0.0004476	1.84	33.66	Used
	TRUE	High	SVTEQGAELSNEERNLLSVAYK	1xDeamidated [N/Q]	FALSE	0.0100537	0.000480221	1	1	5	XP_013974025.1	1	2438.2	0								No Quan Values	High	Not Found	High	0.0001485	0.0005293	3.17		Not Used
	TRUE	High	IETELRDICNDVLSLLEK	1xCarbamidomethyl [C9]; 1xDeamidated [N10]	FALSE	0.00326628	0.000480221	1	1	3	XP_013974025.1	1	2161.11	0								Not Reliable	High	High	High	0.0001485	0.0002568	4.39		Not Used
	TRUE	High	FLIPNASQAESK		FALSE	0.00705452	0.000480221	1	1	4	XP_013974025.1	0	1304.68	0	1.425	0.903199	0	82.5	117.5	77018880	109772864		High	High	High	0.0002602	0.002054	2.3	33.52	Used
	TRUE	High	LAEQAERYDDMAACMK	1xCarbamidomethyl [C14]; 1xDeamidated [Q4]; 1xOxidation [M]	FALSE	0.0161424	0.000666919	1	1	4	XP_013974025.1	1	1918.8	0								No Quan Values	High	High	High	0.002806	0.03869	2.33		Not Used
	TRUE	High	LAEQAERYDDMAACMK	1xCarbamidomethyl [C14]; 1xDeamidated [Q4]	FALSE	0.0220608	0.000666919	1	1	1	XP_013974025.1	1	1902.8	0								Not Reliable	High	Not Found	High	0.0002019	0.00132	2.79		Not Used
	TRUE	High	VVSSIEQKTEGAEK	1xDeamidated [Q7]	FALSE	0.0170252	0.000666919	1	1	1	XP_013974025.1	1	1505.77	0								No Quan Values	Not Found	High	High	0.0002019	0.0009385	2.72		Not Used
	TRUE	High	YLAEVAAGDDK		FALSE	0.0194468	0.000666919	1	1	1	XP_013974025.1	0	1151.56	0	3.966	0.44124	0	40.3	159.7	42466	168401		Peak Found	High	High	0.0002019	0.001108	1.96	17.78	Used
	TRUE	High	MDKNELVQK	1xAcetyl [N-Term]	FALSE	0.0423477	0.00101489	1	1	1	XP_013974025.1	1	1146.58	0	0.857	0.952932	0	107.7	92.3	34443.6	29506.5		High	Peak Found	High	0.000303	0.003672	1.94	18.64	Used
	TRUE	High	SVTEQGAELSNEERNLLSVAYK		FALSE	0.0409862	0.00101489	1	1	1	XP_013974025.1	1	2437.22	0								No Quan Values	High	Not Found	High	0.000303	0.003452	2.83		Not Used
	TRUE	High	KGIVDQSQQAYQEAFEISKK		FALSE	0.0518185	0.00101489	1	1	1	XP_013974025.1	2	2297.18	0								No Quan Values	High	Not Found	High	0.000303	0.005266	3.39		Not Used
	TRUE	High	FLIPNASQAESK	1xDeamidated [N/Q]	FALSE	0.0887481	0.00400093	1	1	2	XP_013974025.1	0	1305.67	0								Not Reliable	Not Found	High	High	0.003149	0.04219	1.59		Not Used
TRUE	High	Master Protein	XP_005625117.1	tubulin beta-4B chain isoform X2 [Canis lupus familiaris]	0	FALSE	224.449	77	24	177	3	1	445	49.8	4.89	367.18	24	18	1.187	0.955956	50.45	89.6	110.4	6.65452e+07	8.19688e+07	High	High
	Checked	Confidence	Sequence	Modifications	Contaminant	Qvality PEP	Qvality q-value	# Protein Groups	# Proteins	# PSMs	Master Protein Accessions	# Missed Cleavages	Theo. MH+ [Da]	# Razor Quan Results	Abundance Ratio: (F4, Sample) / (F3, Control)	Abundance Ratio Adj. P-Value: (F4, Sample) / (F3, Control)	Abundance Ratio Variability [%]: (F4, Sample) / (F3, Control)	Abundances (Grouped): F3, Control	Abundances (Grouped): F4, Sample	Abundance: F3: Control	Abundance: F4: Sample	Quan Info	Found in Sample: [S3] F3: Control	Found in Sample: [S4] F4: Sample	Confidence (by Search Engine): Sequest HT	Percolator q-Value (by Search Engine): Sequest HT	Percolator PEP (by Search Engine): Sequest HT	XCorr (by Search Engine): Sequest HT	Top Apex RT [min]	Quan Usage
	TRUE	High	LHFFMPGFAPLTSR	1xOxidation [M5]	FALSE	0.000374255	0	4	8	7	XP_005635298.2; XP_532060.4; XP_005625117.1; XP_856151.2	0	1636.83	0	0.803	0.952941	0	110.9	89.1	10972373	8.81559e+06	Shared	High	High	High	0.0001092	0.0001823	3.43	65.68	Not Used
	TRUE	High	INVYYNEATGGK		FALSE	0.000376775	0	1	1	4	XP_005625117.1	0	1328.65	0	2.972	0.461879	0	50.3	149.7	4.03012e+06	11978869		High	High	High	0	4.16e-05	2.73	25.41	Used
	TRUE	High	IMNTFSVVPSPK	1xOxidation [M2]	FALSE	5.60053e-05	0	2	5	4	XP_532060.4; XP_005625117.1	0	1335.7	0	0.841	0.971875	0	108.6	91.4	7.15908e+06	6.02135e+06	Shared	High	High	High	0.0001485	0.0007525	2.44	35.76	Used
	TRUE	High	ISEQFTAMFR	1xOxidation [M8]	FALSE	5.90949e-05	0	3	8	6	XP_532060.4; XP_005625117.1; XP_856151.2	0	1245.59	0	1.05	0.988634	0	97.6	102.4	5.43514e+06	5.70501e+06	Shared	High	High	High	0	8.546e-06	3.63	38.43	Used
	TRUE	High	SGPFGQIFRPDNFVFGQSGAGNNWAK		FALSE	1.06039e-07	0	3	6	4	XP_532060.4; XP_005625117.1; XP_856151.2	0	2798.34	0	0.774	0.937776	0	112.8	87.2	3.56232e+06	2.75598e+06	Shared	High	High	High	0	3.659e-08	5.35	85.17	Used
	TRUE	High	SGPFGQIFRPDNFVFGQSGAGNNWAK	1xDeamidated [N/Q]	FALSE	2.76907e-07	0	3	6	7	XP_532060.4; XP_005625117.1; XP_856151.2	0	2799.33	0								Not Reliable	High	High	High	0	8.342e-08	5.59		Not Used
	TRUE	High	SGPFGQIFRPDNFVFGQSGAGNNWAK	2xDeamidated [Q/N]	FALSE	0.000147232	0	3	6	2	XP_532060.4; XP_005625117.1; XP_856151.2	0	2800.31	0								Not Reliable	High	Not Found	High	0	1.87e-05	4.19		Not Used
	TRUE	High	LTTPTYGDLNHLVSATMSGVTTCLR	1xCarbamidomethyl [C23]; 1xOxidation [M17]	FALSE	0.00162663	0	3	6	3	XP_532060.4; XP_005625117.1; XP_856151.2	0	2724.33	0	0.854	0.971875	0	107.9	92.1	4.0589e+06	3.46624e+06	Shared	High	High	High	0	0.0001361	2.7	72.29	Used
	TRUE	High	NSSYFVEWIPNNVK	1xDeamidated [N1]	FALSE	0.000742058	0	4	10	1	XP_860433.2; XP_532060.4; XP_005625117.1; XP_856151.2	0	1697.82	0								Not Reliable	Not Found	High	High	0	7.326e-05	2.74		Not Used
	TRUE	High	MREIVHLQAGQCGNQIGAK	1xCarbamidomethyl [C12]; 1xDeamidated [Q/N]; 1xOxidation [M1]	FALSE	0.000167258	0	3	6	46	XP_532060.4; XP_005625117.1; XP_856151.2	1	2127.04	0	1.348	0.929628	0	85.2	114.8	366901	494675	Shared	High	High	High	0	3.861e-05	4.52	24.3	Used
	TRUE	High	MSATFIGNSTAIQELFK	1xOxidation [M1]	FALSE	0.000145268	0	2	5	2	XP_005625117.1; XP_856151.2	0	1873.94	1	2.091	0.757224	0	64.7	135.3	266355	557080	Shared	High	High	High	0	0.0001101	2.86	82.51	Used
	TRUE	High	MSMKEVDEQMLNVQNK	2xOxidation [M3; M]	FALSE	0.000159581	0	3	7	11	XP_532060.4; XP_005625117.1; XP_856151.2	1	1955.89	0	3.461	0.348904	0	44.8	155.2	737600	2.55313e+06	Shared	High	High	High	0	9.338e-05	3.39	25.33	Used
	TRUE	High	MREIVHLQAGQCGNQIGAK	1xCarbamidomethyl [C12]; 1xOxidation [M1]	FALSE	5.79432e-07	0	3	6	26	XP_532060.4; XP_005625117.1; XP_856151.2	1	2126.06	0	2.426	0.634348	0	58.4	141.6	5.17268e+06	1.25487e+07	Shared	High	High	High	0	1.583e-07	4.77	22.99	Used
	TRUE	High	EVDEQMLNVQNK		FALSE	0.000333901	0	3	7	2	XP_532060.4; XP_005625117.1; XP_856151.2	0	1446.69	0	2.398	0.641998	0	58.9	141.1	1.07121e+06	2.56866e+06	Shared	High	High	High	0	3.769e-05	3.77	26.29	Used
	TRUE	High	VSDTVVEPYNATLSVHQLVENTDETYCIDNEALYDICFR	2xCarbamidomethyl [C27; C37]; 3xDeamidated [N21; N30; N/Q]	FALSE	0.000772541	0	4	6	2	XP_860433.2; XP_532060.4; XP_005625117.1; XP_856151.2	0	4596.06	0								No Quan Values	High	Not Found	High	0	7.568e-05	3.08		Not Used
	TRUE	High	AVLVDLEPGTMDSVR		FALSE	0.00173944	0	1	3	2	XP_005625117.1	0	1601.82	0								No Quan Values	High	High	High	0.0002602	0.002322	2.3		Not Used
	TRUE	High	EAESCDCLQGFQLTHSLGGGTGSGMGTLLISK	2xCarbamidomethyl [C5; C7]; 1xDeamidated [Q]; 1xOxidation [M25]	FALSE	0.000258735	0	2	4	2	XP_532060.4; XP_005625117.1	0	3328.51	0								No Quan Values	High	High	High	0	3.031e-05	3.89		Not Used
	TRUE	High	EIVHLQAGQCGNQIGAK	1xCarbamidomethyl [C10]	FALSE	2.65857e-05	0	3	6	20	XP_532060.4; XP_005625117.1; XP_856151.2	0	1822.92	0	2.073	0.737591	0	65.1	134.9	3.37798e+06	7.00257e+06	Shared	High	High	High	0	4.305e-06	3.63	25.18	Used
	TRUE	High	GHYTEGAELVDSVLDVVRK		FALSE	0.000227758	0	3	6	5	XP_532060.4; XP_005625117.1; XP_856151.2	1	2087.08	0	0.608	0.85773	0	124.3	75.7	5.44537e+06	3.31284e+06	Shared	High	High	High	0	2.716e-05	3.73	81.66	Used
	TRUE	High	GHYTEGAELVDSVLDVVR		FALSE	1.62943e-07	0	3	6	6	XP_532060.4; XP_005625117.1; XP_856151.2	0	1958.98	0	0.729	0.917227	0	115.7	84.3	4.37495e+06	3.19068e+06	Shared	High	High	High	0	2.429e-07	4.17	86.01	Used
	TRUE	High	ALTVPELTQQMFDAK	1xOxidation [M11]	FALSE	0.000430899	0	2	6	3	XP_860433.2; XP_005625117.1	0	1707.86	0	1.015	0.994893	0	99.2	100.8	3.60473e+06	3.66029e+06	Shared	High	High	High	0	4.657e-05	3.19	53.78	Used
	TRUE	High	YLTVAAVFR		FALSE	0.00191064	0.000331607	3	7	3	XP_860433.2; XP_532060.4; XP_005625117.1	0	1039.59	0	0.839	0.971875	0	108.8	91.2	6589266	5525644	Shared	High	High	High	0.0001092	0.0001536	2.15	55.6	Used
	TRUE	High	MREIVHLQAGQCGNQIGAK	1xCarbamidomethyl [C12]; 2xDeamidated [Q/N]; 1xOxidation [M1]	FALSE	0.00525511	0.000480221	3	6	4	XP_532060.4; XP_005625117.1; XP_856151.2	1	2128.03	0								Not Reliable	High	Not Found	High	0.0001485	0.0003106	3.93		Not Used
	TRUE	High	MSATFIGNSTAIQELFKR	1xDeamidated [N8]; 1xOxidation [M1]	FALSE	0.00885519	0.000480221	2	4	1	XP_005625117.1; XP_856151.2	1	2031.02	0								No Quan Values	Not Found	High	High	0.0001485	0.0004699	1.54		Not Used
	TRUE	High	MSMKEVDEQMLNVQNK	1xDeamidated [Q/N]; 2xOxidation [M3; M10]	FALSE	0.00394021	0.000480221	3	7	4	XP_532060.4; XP_005625117.1; XP_856151.2	1	1956.87	0								Not Reliable	Not Found	High	High	0.0002019	0.000994	1.77		Not Used
	TRUE	High	MSMKEVDEQMLNVQNK	3xOxidation [M1; M3; M10]	FALSE	0.00307513	0.000480221	3	7	2	XP_532060.4; XP_005625117.1; XP_856151.2	1	1971.88	0	4.453	0.280549	0	36.7	163.3	79633.4	354593	Shared	High	High	High	0.0001485	0.0005395	2.95	15.87	Used
	TRUE	High	NSSYFVEWIPNNVK		FALSE	0.00315866	0.000480221	4	10	4	XP_860433.2; XP_532060.4; XP_005625117.1; XP_856151.2	0	1696.83	0	1.405	0.907898	0	83.2	116.8	1.52705e+06	2.14492e+06	Shared	High	High	High	0.0001485	0.0002965	2.51	70.43	Used
	TRUE	High	FWEVISDEHGIDPTGTYHGDSDLQLER		FALSE	0.00504819	0.000480221	1	3	2	XP_005625117.1	0	3116.42	0								No Quan Values	High	High	High	0.0001485	0.0003014	2.93		Not Used
	TRUE	High	VSDTVVEPYNATLSVHQLVENTDETYCIDNEALYDICFR	2xCarbamidomethyl [C27; C37]; 2xDeamidated [N/Q]	FALSE	0.0143184	0.000480221	4	6	3	XP_860433.2; XP_532060.4; XP_005625117.1; XP_856151.2	0	4595.08	0								No Quan Values	High	Not Found	High	0.0006972	0.009285	2.6		Not Used
	TRUE	High	ISEQFTAMFR		FALSE	0.00686826	0.000480221	3	8	1	XP_532060.4; XP_005625117.1; XP_856151.2	0	1229.6	0	1.342	0.929628	0	85.4	114.6	390488	523890	Shared	Peak Found	High	High	0.0001485	0.0003797	1.92	54.96	Used
	TRUE	High	LTTPTYGDLNHLVSATMSGVTTCLR	1xCarbamidomethyl [C23]; 1xDeamidated [N10]; 1xOxidation [M17]	FALSE	0.00714954	0.000480221	3	6	2	XP_532060.4; XP_005625117.1; XP_856151.2	0	2725.32	0								Not Reliable	High	Not Found	High	0.0001485	0.0003921	3.26		Not Used
	TRUE	High	LTTPTYGDLNHLVSATMSGVTTCLR	1xCarbamidomethyl [C23]; 1xDeamidated [N10]	FALSE	0.00326628	0.000480221	3	6	1	XP_532060.4; XP_005625117.1; XP_856151.2	0	2709.32	0								Not Reliable	High	Not Found	High	0.0001485	0.0002235	4.07		Not Used
	TRUE	High	EIVHIQAGQCGNQIGAK	1xCarbamidomethyl [C10]; 1xDeamidated [N/Q]	FALSE	0.00515061	0.000480221	3	6	10	XP_532060.4; XP_005625117.1; XP_856151.2	0	1823.91	0								No Quan Values	High	High	High	0.0001485	0.0003062	3.61		Not Used
	TRUE	High	EVDEQMLNVQNK	1xOxidation [M6]	FALSE	0.0126148	0.000480221	3	7	2	XP_532060.4; XP_005625117.1; XP_856151.2	0	1462.68	0								No Quan Values	High	High	High	0.0001485	0.0006664	1.83		Not Used
	TRUE	High	MSATFIGNSTAIQELFKR	1xOxidation [M1]	FALSE	0.0180756	0.000666919	2	4	1	XP_005625117.1; XP_856151.2	1	2030.04	0								No Quan Values	High	Not Found	High	0.0002019	0.001009	2.8		Not Used
	TRUE	High	AVLVDLEPGTMDSVR	1xOxidation [M11]	FALSE	0.0460956	0.00101489	1	3	2	XP_005625117.1	0	1617.82	0	0.818	0.959715	0	110	90	9131099	7.47353e+06		High	Peak Found	High	0.001074	0.01323	2.02	43.19	Used
	TRUE	High	MSMKEVDEQMLNVQNK	1xOxidation [M10]	FALSE	0.047312	0.00101489	3	7	2	XP_532060.4; XP_005625117.1; XP_856151.2	1	1939.89	0	0.792	0.930056	0	111.6	88.4	164273	130116	Shared	High	Peak Found	High	0.000303	0.004461	2.71	28.67	Used
	TRUE	High	VSDTVVEPYNATLSVHQLVENTDETYCIDNEALYDICFR	2xCarbamidomethyl [C27; C37]; 1xDeamidated [N30]	FALSE	0.0449095	0.00101489	4	6	1	XP_860433.2; XP_532060.4; XP_005625117.1; XP_856151.2	0	4594.09	0								No Quan Values	High	Not Found	High	0.000303	0.004084	2.98		Not Used
TRUE	High	Master Protein	XP_532697.2	fibrinogen alpha chain [Canis lupus familiaris]	0	FALSE	221.965	33	27	308	27	1	892	96.6	6.1	527.31	27	0	1.25	0.974301	43.29	81.6	118.4	2.28491e+08	3.31624e+08	High	High
	Checked	Confidence	Sequence	Modifications	Contaminant	Qvality PEP	Qvality q-value	# Protein Groups	# Proteins	# PSMs	Master Protein Accessions	# Missed Cleavages	Theo. MH+ [Da]	# Razor Quan Results	Abundance Ratio: (F4, Sample) / (F3, Control)	Abundance Ratio Adj. P-Value: (F4, Sample) / (F3, Control)	Abundance Ratio Variability [%]: (F4, Sample) / (F3, Control)	Abundances (Grouped): F3, Control	Abundances (Grouped): F4, Sample	Abundance: F3: Control	Abundance: F4: Sample	Quan Info	Found in Sample: [S3] F3: Control	Found in Sample: [S4] F4: Sample	Confidence (by Search Engine): Sequest HT	Percolator q-Value (by Search Engine): Sequest HT	Percolator PEP (by Search Engine): Sequest HT	XCorr (by Search Engine): Sequest HT	Top Apex RT [min]	Quan Usage
	TRUE	High	KVLEQVQHIHLLQK		FALSE	5.41568e-05	0	1	1	17	XP_532697.2	1	1713.02	0	1.879	0.795632	0	69.5	130.5	3.36474e+07	6.3208e+07		High	High	High	0	0.0001075	2.85	32.8	Used
	TRUE	High	VLEQVQHIHLLQK		FALSE	0.000457727	0	1	1	15	XP_532697.2	0	1584.92	0	1.897	0.788526	0	69	131	4.028e+07	7.64054e+07		High	High	High	0	6.441e-05	1.82	36.39	Used
	TRUE	High	QFVTSSTTYNRGDSAFESK		FALSE	7.62832e-06	0	1	1	13	XP_532697.2	1	2124.98	0	0.882	0.9743	0	106.3	93.7	2.52502e+07	2.22733e+07		High	High	High	0	3.156e-06	3.46	27.92	Used
	TRUE	High	QFVTSSTTYNRGDSAFESK	1xDeamidated [N/Q]	FALSE	9.14181e-05	0	1	1	14	XP_532697.2	1	2125.97	0	1.298	0.971875	0	87	113	146703	190395		High	High	High	0	1.242e-05	3.36	28.85	Used
	TRUE	High	THIMGSDSDIFTNIGTPEFPSSGK	1xOxidation [M4]	FALSE	0.000290006	0	1	1	5	XP_532697.2	0	2554.18	0	0.686	0.89828	0	118.6	81.4	3.19203e+06	2189767		High	High	High	0	3.347e-05	3.31	58.43	Used
	TRUE	High	LVTSKGEKELLIGNEK		FALSE	2.13034e-05	0	1	1	6	XP_532697.2	2	1758	0	0.861	0.971875	0	107.4	92.6	2.90316e+06	2.50104e+06		High	High	High	0	3.549e-06	3.19	25.06	Used
	TRUE	High	MKGLIDEVNQDFTNR	1xOxidation [M1]	FALSE	0.000215851	0	1	1	4	XP_532697.2	1	1795.86	0	0.888	0.9743	0	105.9	94.1	1.52178e+06	1350973		High	High	High	0.0001485	0.0002895	3.28	43.1	Used
	TRUE	High	NNKDSSSLTTNIMELVR	1xOxidation [M13]	FALSE	2.45283e-05	0	1	1	9	XP_532697.2	1	1937.96	0	0.761	0.931179	0	113.5	86.5	2.02189e+06	1.53936e+06		High	High	High	0.0001485	0.000697	2.79	50.43	Used
	TRUE	High	EVVNSEDGSDCGDLSHTFAGSLDDLHAR	1xCarbamidomethyl [C11]; 1xDeamidated [N4]	FALSE	5.27221e-05	0	1	1	5	XP_532697.2	0	3004.29	0								No Quan Values	High	High	High	0	0.0001143	3.45		Not Used
	TRUE	High	EVVNSEDGSDCGDLSHTFAGSLDDLHAR	1xCarbamidomethyl [C11]	FALSE	0.000394898	0	1	1	5	XP_532697.2	0	3003.3	0	1.454	0.900073	0	81.5	118.5	2.3306e+06	3.38807e+06		High	High	High	0	6.705e-05	3.22	52.19	Used
	TRUE	High	EGEFIAEGGGVR		FALSE	0.000698572	0	1	1	4	XP_532697.2	0	1220.59	0	1.375	0.915249	0	84.2	115.8	641078	881500		High	High	High	0.0001485	0.0002018	2.05	24.88	Used
	TRUE	High	DSSSLTTNIMELVR	1xOxidation [M10]	FALSE	6.36233e-05	0	1	1	10	XP_532697.2	0	1581.78	0	1.377	0.915249	0	84.1	115.9	5.98462e+06	8240642		High	High	High	0	9.134e-06	3.84	62.54	Used
	TRUE	High	ELLIGNEKVTSGSTTTTR	1xDeamidated [N6]	FALSE	0.00139412	0	1	1	4	XP_532697.2	1	1907.99	0	1.078	0.978491	0	96.2	103.8	2.23229e+06	2.40749e+06		High	High	High	0	0.0001213	2.05	29.12	Used
	TRUE	High	GEKELLIGNEKVTSGSTTTTR		FALSE	0.0017048	0	1	1	2	XP_532697.2	2	2221.17	0	0.557	0.818899	0	128.5	71.5	398340	221683		High	High	High	0	0.0001412	2.78	24.97	Used
	TRUE	High	GDFATANNNDNTYSQVSEDLR	2xDeamidated [N8; N]	FALSE	0.000737095	0	1	1	5	XP_532697.2	0	2332.98	0								Not Reliable	High	High	High	0	7.294e-05	3.8		Not Used
	TRUE	High	GDFATANNNDNTYSQVSEDLR	1xDeamidated [N/Q]	FALSE	5.91088e-06	0	1	1	51	XP_532697.2	0	2332	0								No Quan Values	High	High	High	0	3.968e-06	4.41		Not Used
	TRUE	High	GDFATANNNDNTYSQVSEDLR		FALSE	7.73313e-07	0	1	1	13	XP_532697.2	0	2331.01	0	1.027	0.99208	0	98.7	101.3	1.83038e+07	1.88009e+07		High	High	High	0	2.03e-07	4.8	39.51	Used
	TRUE	High	GLIDEVNQDFTNR		FALSE	3e-05	0	1	1	14	XP_532697.2	0	1520.73	0	1.463	0.89828	0	81.2	118.8	13382586	1.95769e+07		High	High	High	0	7.569e-06	4.25	51.96	Used
	TRUE	High	YYEDQQKQLEQVIAK		FALSE	0.000389633	0	1	1	9	XP_532697.2	1	1882.95	0	1.099	0.977165	0	95.3	104.7	9.83603e+06	1.081e+07		High	High	High	0	4.287e-05	2.86	39.29	Used
	TRUE	High	LDRDGNARGDTPSHGTGSVPESPR		FALSE	0.00248156	0.000331607	1	1	7	XP_532697.2	2	2478.17	0	0.606	0.857693	0	124.5	75.5	2.36704e+06	1.43409e+06		High	High	High	0.0001092	0.0001853	2.52	12.74	Used
	TRUE	High	ELLIGNEKVTSGSTTTTR		FALSE	0.00191064	0.000331607	1	1	4	XP_532697.2	1	1907.01	0	0.571	0.831312	0	127.3	72.7	1177991	672823		High	High	High	0.0001092	0.0001536	2.51	27.79	Used
	TRUE	High	TSPAPNMLPGDYK	1xOxidation [M7]	FALSE	0.0103259	0.000480221	1	1	8	XP_532697.2	0	1406.66	0	2.035	0.746953	0	65.9	134.1	5.89344e+06	1.19945e+07		High	High	High	0.000303	0.002564	2.61	24	Used
	TRUE	High	THIMGSDSDIFTNIGTPEFPSSGK	1xDeamidated [N13]; 1xOxidation [M4]	FALSE	0.0035161	0.000480221	1	1	3	XP_532697.2	0	2555.16	0								Not Reliable	High	High	High	0.0002602	0.001931	2.96		Not Used
	TRUE	High	QFVTSSTTYNRGDSAFESK	2xDeamidated [Q1; N10]	FALSE	0.00903451	0.000480221	1	1	1	XP_532697.2	1	2126.95	0								Not Reliable	High	Not Found	High	0.0001485	0.0004784	2.3		Not Used
	TRUE	High	TPPGILLPSRK		FALSE	0.0056567	0.000480221	1	1	15	XP_532697.2	1	1178.73	0	1.204	0.97004	0	90.8	109.2	1.11862e+07	1.34649e+07		High	High	High	0.0001485	0.0003273	2.81	30.04	Used
	TRUE	High	TPPGILLPSR		FALSE	0.00426999	0.000480221	1	1	8	XP_532697.2	0	1050.63	0	1.773	0.825563	0	72.1	127.9	6.97975e+06	1.23758e+07		High	High	High	0.0001485	0.0005681	2.22	37.1	Used
	TRUE	High	NSLFDYQK		FALSE	0.0129559	0.000480221	1	1	5	XP_532697.2	0	1014.49	0	2.01	0.753273	0	66.4	133.6	2.7625e+06	5.55365e+06		High	High	High	0.0001485	0.0006841	2.17	29.7	Used
	TRUE	High	NNKDSSSLTTNIMELVR		FALSE	0.0127842	0.000480221	1	1	1	XP_532697.2	1	1921.96	0								No Quan Values	High	Not Found	High	0.0001485	0.0006749	2.41		Not Used
	TRUE	High	LDRDGNARGDTPSHGTGSVPESPR	1xDeamidated [N6]	FALSE	0.00399336	0.000480221	1	1	13	XP_532697.2	2	2479.16	0	1.405	0.907898	0	83.2	116.8	1.53195e+06	2.15232e+06		High	High	High	0.000303	0.005005	3.6	13.44	Used
	TRUE	High	DSSSLTTNIMELVR		FALSE	0.0108924	0.000480221	1	1	3	XP_532697.2	0	1565.78	0								No Quan Values	High	High	High	0.0002019	0.001034	2.61		Not Used
	TRUE	High	LKNSLFDYQK		FALSE	0.00481703	0.000480221	1	1	7	XP_532697.2	1	1255.67	0	1.462	0.89828	0	81.3	118.7	5712720	8.34935e+06		High	High	High	0.0001485	0.0002915	2.59	29.86	Used
	TRUE	High	EVTKEVVNSEDGSDCGDLSHTFAGSLDDLHAR	1xCarbamidomethyl [C15]	FALSE	0.0198382	0.000666919	1	1	1	XP_532697.2	1	3460.56	0	0.915	0.977963	0	104.4	95.6	1.18861e+06	1.08799e+06		Peak Found	High	High	0.0002019	0.001135	2.57	50.25	Used
	TRUE	High	EGEFIAEGGGVRGPR		FALSE	0.0255215	0.000666919	1	1	1	XP_532697.2	1	1530.77	0	1.119	0.979956	0	94.4	105.6	305713	342172		High	Peak Found	High	0.0002019	0.001621	1.87	25	Used
	TRUE	High	NNKDSSSLTTNIMELVR	1xDeamidated [N11]; 1xOxidation [M13]	FALSE	0.0185628	0.000666919	1	1	2	XP_532697.2	1	1938.94	0								Not Reliable	High	High	High	0.0002019	0.001044	3.76		Not Used
	TRUE	High	TSSHSKQFVTSSTTYNRGDSAFESK	1xDeamidated [N16]	FALSE	0.0180756	0.000666919	1	1	1	XP_532697.2	2	2753.26	0								Not Reliable	Not Found	High	High	0.0002019	0.001014	2.62		Not Used
	TRUE	High	YYEDQQKQLEQVIAK	1xDeamidated [Q]	FALSE	0.0332275	0.000865703	1	1	3	XP_532697.2	1	1883.94	0								Not Reliable	Not Found	High	High	0.006172	0.08013	2.17		Not Used
	TRUE	High	GEKELLIGNEKVTSGSTTTTR	1xDeamidated [N9]	FALSE	0.0279955	0.000865703	1	1	4	XP_532697.2	2	2222.15	0	0.742	0.922256	0	114.8	85.2	735434	545744		High	High	High	0.0002602	0.001865	2.68	26.02	Used
	TRUE	High	EVTKEVVNSEDGSDCGDLSHTFAGSLDDLHAR	1xCarbamidomethyl [C15]; 1xDeamidated [N8]	FALSE	0.0876355	0.00382875	1	1	1	XP_532697.2	1	3461.54	0								Not Reliable	High	Not Found	High	0.001292	0.01392	2.27		Not Used
	TRUE	High	LVTSKGEKELLIGNEK	1xDeamidated [N14]	FALSE	0.120441	0.00590393	1	1	1	XP_532697.2	2	1758.98	0								Not Reliable	High	Not Found	High	0.002102	0.02431	2.58		Not Used
TRUE	High	Master Protein	XP_005635298.2	tubulin beta-1 chain isoform X1 [Canis lupus familiaris]	0	FALSE	212.909	69	24	129	20	1	601	65.6	5.69	297.22	24	5	0.892	0.932847	37.7	97.9	102.1	1.09864e+08	1.14615e+08	High	High
	Checked	Confidence	Sequence	Modifications	Contaminant	Qvality PEP	Qvality q-value	# Protein Groups	# Proteins	# PSMs	Master Protein Accessions	# Missed Cleavages	Theo. MH+ [Da]	# Razor Quan Results	Abundance Ratio: (F4, Sample) / (F3, Control)	Abundance Ratio Adj. P-Value: (F4, Sample) / (F3, Control)	Abundance Ratio Variability [%]: (F4, Sample) / (F3, Control)	Abundances (Grouped): F3, Control	Abundances (Grouped): F4, Sample	Abundance: F3: Control	Abundance: F4: Sample	Quan Info	Found in Sample: [S3] F3: Control	Found in Sample: [S4] F4: Sample	Confidence (by Search Engine): Sequest HT	Percolator q-Value (by Search Engine): Sequest HT	Percolator PEP (by Search Engine): Sequest HT	XCorr (by Search Engine): Sequest HT	Top Apex RT [min]	Quan Usage
	TRUE	High	LHFFMPGFAPLTSR	1xOxidation [M5]	FALSE	0.000374255	0	4	8	7	XP_005635298.2; XP_532060.4; XP_005625117.1; XP_856151.2	0	1636.83	0	0.803	0.952941	0	110.9	89.1	10972373	8.81559e+06	Shared	High	High	High	0.0001092	0.0001823	3.43	65.68	Used
	TRUE	High	LGALFHPDSFIYSNSGAGNNWAK		FALSE	1.66183e-05	0	1	2	2	XP_005635298.2	0	2466.18	0	0.099	0.00936688	0	181.9	18.1	1.86019e+06	184598		High	Peak Found	High	0	2.867e-06	3.26	69.44	Used
	TRUE	High	VAVCDIPPPGLSMAATFMGNSTAVQELFSR	1xCarbamidomethyl [C4]; 1xDeamidated [N/Q]; 2xOxidation [M13; M18]	FALSE	0.000392257	0	1	2	6	XP_005635298.2	0	3199.51	0	0.963	0.991149	0	101.9	98.1	606586	584188		High	High	High	0.0001485	0.0002432	4.58	88.49	Used
	TRUE	High	HSSCFVDWIPNNVK	1xCarbamidomethyl [C4]	FALSE	0.000260478	0	1	2	2	XP_005635298.2	0	1702.8	0								No Quan Values	High	High	High	0	3.053e-05	3.3		Not Used
	TRUE	High	LAAPSYSDLNHLVSLTMSGITTSLR		FALSE	0.000352318	0	1	2	1	XP_005635298.2	0	2647.38	0								No Quan Values	High	Not Found	High	0	3.936e-05	1.72		Not Used
	TRUE	High	LAAPSYSDLNHLVSLTMSGITTSLR	1xDeamidated [N10]	FALSE	0.000338413	0	1	2	1	XP_005635298.2	0	2648.36	0								Not Reliable	High	Not Found	High	0	3.812e-05	3		Not Used
	TRUE	High	LAAPSYSDLNHLVSLTMSGITTSLR	1xOxidation [M17]	FALSE	1.59694e-07	0	1	2	3	XP_005635298.2	0	2663.37	0	0.75	0.926633	0	114.3	85.7	5.44702e+06	4.0867e+06		High	High	High	0	5.199e-08	3.89	89.91	Used
	TRUE	High	LAAPSYSDLNHLVSLTMSGITTSLR	1xDeamidated [N10]; 1xOxidation [M17]	FALSE	9.90862e-05	0	1	2	3	XP_005635298.2	0	2664.35	0								No Quan Values	High	High	High	0	1.914e-05	3.46		Not Used
	TRUE	High	SASEACDCLQGFQLVHSLGGGTGAGMGTLLLSR	2xCarbamidomethyl [C6; C8]; 1xOxidation [M26]	FALSE	0.00103782	0	1	2	2	XP_005635298.2	0	3366.59	0	0.607	0.857693	0	124.4	75.6	1.78079e+06	1.08173e+06		High	High	High	0	9.577e-05	3.24	80.57	Used
	TRUE	High	EVDEQMLTVQTR		FALSE	0.000310138	0	1	2	2	XP_005635298.2	0	1448.7	0	1.545	0.882137	0	78.6	121.4	1.76363e+06	2.72535e+06		High	High	High	0	3.535e-05	2.33	30.84	Used
	TRUE	High	EVDEQMLTVQTR	1xOxidation [M6]	FALSE	0.000473347	0	1	2	4	XP_005635298.2	0	1464.7	0	3.203	0.406161	0	47.6	152.4	704833	2257722		High	High	High	0.004179	0.05744	2.4	20.9	Used
	TRUE	High	VSDTVVEPYNAVLSLQQLAQHADACFCIDNEALYDICVR	3xCarbamidomethyl [C25; C27; C37]; 1xDeamidated [Q/N]	FALSE	0.000357079	0	1	2	5	XP_005635298.2	0	4498.1	0								No Quan Values	High	Not Found	High	0.0001092	0.0001905	4.19		Not Used
	TRUE	High	VSDTVVEPYNAVLSLQQLAQHADACFCIDNEALYDICVR	3xCarbamidomethyl [C25; C27; C37]; 2xDeamidated [N/Q]	FALSE	0.00161576	0	1	2	2	XP_005635298.2	0	4499.08	0								No Quan Values	High	Not Found	High	0	0.0001357	4.99		Not Used
	TRUE	High	AFVHWYTSEGMDVGEFAEAESNIHDLVSEYQQLQDAK	1xOxidation [M11]	FALSE	0.000212973	0	1	2	1	XP_005635298.2	0	4259.91	0	0.01	9.75497e-17		200		605284			High	Not Found	High	0	2.561e-05	4.48	108.09	Used
	TRUE	High	AFVHWYTSEGMDVGEFAEAESNIHDLVSEYQQLQDAK	2xDeamidated [N22; Q31]; 1xOxidation [M11]	FALSE	0.000619093	0	1	2	2	XP_005635298.2	0	4261.88	0								No Quan Values	High	Not Found	High	0	6.319e-05	5.13		Not Used
	TRUE	High	GHYTEGAELAESVLDAVR		FALSE	9.08287e-06	0	1	2	6	XP_005635298.2	0	1916.93	0	0.741	0.922256	0	114.9	85.1	7.51833e+06	5567828		High	High	High	0	1.698e-06	4.92	77.33	Used
	TRUE	High	AAEEEEDAEAVGEAEMEPEDGPQVPGEAA	1xDeamidated [Q23]; 1xOxidation [M16]	FALSE	0.000413893	0	1	2	2	XP_005635298.2	0	2973.19	0								No Quan Values	High	High	High	0	4.495e-05	3.24		Not Used
	TRUE	High	ALLVDLEPGTMDSIR	1xOxidation [M11]	FALSE	3.0202e-05	0	1	2	5	XP_005635298.2	0	1645.85	0	0.883	0.9743	0	106.2	93.8	4.7787e+06	4.22186e+06		High	High	High	0	4.799e-06	3.13	56.22	Used
	TRUE	High	ALTVAELTQQVFDAR		FALSE	4.39931e-06	0	1	2	9	XP_005635298.2	0	1661.89	0	0.819	0.960264	0	109.9	90.1	1.02709e+07	8414856		High	High	High	0	1.517e-06	4.68	86.25	Used
	TRUE	High	FWEVIGDEHGIDSVGGYCGDCALQLER	2xCarbamidomethyl [C18; C21]; 1xDeamidated [Q24]	FALSE	0.000544983	0	1	2	2	XP_005635298.2	0	3083.35	0								No Quan Values	High	High	High	0	5.678e-05	4.23		Not Used
	TRUE	High	VAVCDIPPPGLSMAATFMGNSTAVQELFSR	1xCarbamidomethyl [C4]; 2xOxidation [M13; M18]	FALSE	0.0018353	0.000331607	1	2	2	XP_005635298.2	0	3198.53	0	0.892	0.9743	0	105.7	94.3	695633	620769		High	High	High	0.0001092	0.0001492	2.84	88.87	Used
	TRUE	High	FWEVIGDEHGIDSVGGYCGDCALQLER	2xCarbamidomethyl [C18; C21]	FALSE	0.00222918	0.000331607	1	2	2	XP_005635298.2	0	3082.37	0								No Quan Values	High	High	High	0.0001092	0.0001714	4.2		Not Used
	TRUE	High	AAEEEEDAEAVGEAEMEPEDGPQVPGEAA	1xOxidation [M16]	FALSE	0.00268939	0.000331607	1	2	2	XP_005635298.2	0	2972.21	0	100	9.75497e-17			200		954094		High	High	High	0.0001485	0.0002008	3.03	42.42	Used
	TRUE	High	ILNAFSVLPSPK		FALSE	0.00233628	0.000331607	1	2	6	XP_005635298.2	0	1285.75	0	0.656	0.886154	0	120.8	79.2	9.32952e+06	6.11912e+06		High	High	High	0.0001485	0.0002477	3.24	62.62	Used
	TRUE	High	SASEACDCLQGFQLVHSLGGGTGAGMGTLLLSR	2xCarbamidomethyl [C6; C8]; 1xDeamidated [Q]; 1xOxidation [M26]	FALSE	0.00363587	0.000480221	1	2	2	XP_005635298.2	0	3367.57	0								Not Reliable	High	Not Found	High	0.0001485	0.0003069	3.71		Not Used
	TRUE	High	SASEACDCLQGFQLVHSLGGGTGAGMGTLLLSR	2xCarbamidomethyl [C6; C8]	FALSE	0.0155101	0.000480221	1	2	1	XP_005635298.2	0	3350.59	0								No Quan Values	High	Not Found	High	0.0001485	0.0008403	3.14		Not Used
	TRUE	High	VSDTVVEPYNAVLSLQQLAQHADACFCIDNEALYDICVR	3xCarbamidomethyl [C25; C27; C37]	FALSE	0.00511624	0.000480221	1	2	2	XP_005635298.2	0	4497.12	0								No Quan Values	High	Not Found	High	0.0001485	0.0003044	3.35		Not Used
	TRUE	High	LGALFHPDSFIYSNSGAGNNWAK	1xDeamidated [N14]	FALSE	0.00817265	0.000480221	1	2	2	XP_005635298.2	0	2467.17	0								No Quan Values	High	Not Found	High	0.001341	0.01469	3.39		Not Used
	TRUE	High	EVDEQMLTVQTR	1xDeamidated [Q]; 1xOxidation [M6]	FALSE	0.0153049	0.000480221	1	2	2	XP_005635298.2	0	1465.68	0								No Quan Values	Not Found	High	High	0.0001485	0.0008272	2.6		Not Used
	TRUE	High	VAEHFSAMFR	1xOxidation [M8]	FALSE	0.0181962	0.000666919	1	2	3	XP_005635298.2	0	1210.57	0	3.953	0.258211	0	40.4	159.6	2.41323e+06	9539288		High	High	High	0.0002019	0.001018	2.29	25.58	Used
	TRUE	High	SASEACDCLQGFQLVHSLGGGTGAGMGTLLLSR	2xCarbamidomethyl [C6; C8]; 1xDeamidated [Q]	FALSE	0.0524952	0.00101489	1	2	2	XP_005635298.2	0	3351.58	0								No Quan Values	High	Not Found	High	0.0004148	0.00625	2.77		Not Used
	TRUE	High	ALTVAELTQQVFDAR	1xDeamidated [Q]	FALSE	0.0812278	0.00309549	1	2	2	XP_005635298.2	0	1662.87	0								Not Reliable	High	Not Found	High	0.001527	0.01999	2.09		Not Used
	TRUE	High	ALLVDLEPGTMDSIR		FALSE	0.106425	0.00429596	1	2	2	XP_005635298.2	0	1629.85	0	1.405	0.907887	0	83.2	116.8	441577	620376		High	High	High	0.005532	0.07217	2.24	67.81	Used
	TRUE	High	RAFVHWYTSEGMDVGEFAEAESNIHDLVSEYQQLQDAK	1xDeamidated [Q]; 1xOxidation [M12]	FALSE	0.147261	0.00703674	1	2	3	XP_005635298.2	1	4417	0								No Quan Values	High	Not Found	High	0.007834	0.09878	2.74		Not Used
TRUE	High	Master Protein	XP_863385.2	78 kDa glucose-regulated protein [Canis lupus familiaris]	0	FALSE	211.289	49	30	130	29	1	654	72.2	5.16	268.23	30	1	0.518	0.621396	8.46	130.4	69.6	1.82864e+08	9.76996e+07	High	High
	Checked	Confidence	Sequence	Modifications	Contaminant	Qvality PEP	Qvality q-value	# Protein Groups	# Proteins	# PSMs	Master Protein Accessions	# Missed Cleavages	Theo. MH+ [Da]	# Razor Quan Results	Abundance Ratio: (F4, Sample) / (F3, Control)	Abundance Ratio Adj. P-Value: (F4, Sample) / (F3, Control)	Abundance Ratio Variability [%]: (F4, Sample) / (F3, Control)	Abundances (Grouped): F3, Control	Abundances (Grouped): F4, Sample	Abundance: F3: Control	Abundance: F4: Sample	Quan Info	Found in Sample: [S3] F3: Control	Found in Sample: [S4] F4: Sample	Confidence (by Search Engine): Sequest HT	Percolator q-Value (by Search Engine): Sequest HT	Percolator PEP (by Search Engine): Sequest HT	XCorr (by Search Engine): Sequest HT	Top Apex RT [min]	Quan Usage
	TRUE	High	IDTRNELESYAYSLK		FALSE	0.000527001	0	1	1	3	XP_863385.2	1	1801.9	0	0.504	0.758432	0	133	67	7.15461e+06	3.6081e+06		High	High	High	0	5.505e-05	3.12	51.65	Used
	TRUE	High	IEIESFYEGEDFSETLTR		FALSE	1.01853e-07	0	1	1	5	XP_863385.2	0	2164.99	0	0.591	0.848194	0	125.7	74.3	2442989	1.44413e+06		High	High	High	0	3.524e-08	3.92	74.05	Used
	TRUE	High	IINEPTAAAIAYGLDK		FALSE	9.39289e-06	0	2	5	4	XP_005619707.1; XP_863385.2	0	1659.9	0	0.758	0.930356	0	113.7	86.3	4365499	3.31096e+06	Shared	High	High	High	0	1.749e-06	3.42	58.71	Used
	TRUE	High	IINEPTAAAIAYGLDKR		FALSE	1.6734e-06	0	1	1	5	XP_863385.2	1	1816	0	0.503	0.758432	0	133.1	66.9	1.41762e+07	7.13303e+06		High	High	High	0	3.938e-07	2.72	55.02	Used
	TRUE	High	IINEPTAAAIAYGLDKR	1xDeamidated [N3]	FALSE	0.000463912	0	1	1	3	XP_863385.2	1	1816.98	0								No Quan Values	High	High	High	0	4.956e-05	3.25		Not Used
	TRUE	High	KTKPYIQVDIGGGQTK		FALSE	0.000168384	0	1	1	4	XP_863385.2	1	1732.96	0	0.456	0.700027	0	137.3	62.7	2824138	1.28879e+06		High	High	High	0	2.098e-05	3.46	26.03	Used
	TRUE	High	KSQIFSTASDNQPTVTIK		FALSE	0.00110241	0	1	1	3	XP_863385.2	1	1965.03	0	0.686	0.89828	0	118.6	81.4	3.02632e+06	2.07585e+06		High	High	High	0.0001485	0.0006301	2.73	32.42	Used
	TRUE	High	VLEDSDLKKSDIDEIVLVGGSTR		FALSE	0.000463912	0	1	1	2	XP_863385.2	2	2488.31	0	0.56	0.822759	0	128.2	71.8	2.59633e+06	1.45389e+06		High	High	High	0	4.966e-05	3.18	56.26	Used
	TRUE	High	KKELEEIVQPIISK		FALSE	0.000534122	0	1	1	1	XP_863385.2	2	1653.98	0	0.667	0.893446	0	120	80	1.71932e+06	1.14728e+06		High	Peak Found	High	0	5.569e-05	2.33	39.55	Used
	TRUE	High	KSDIDEIVLVGGSTR		FALSE	0.000793555	0	1	1	2	XP_863385.2	1	1588.85	0	0.565	0.826521	0	127.8	72.2	1.18595e+06	670182		High	High	High	0	7.724e-05	2.3	41.63	Used
	TRUE	High	TFAPEEISAMVLTK	1xOxidation [M10]	FALSE	2.73092e-05	0	1	1	5	XP_863385.2	0	1552.79	0	0.188	0.115925	0	168.3	31.7	6.06806e+06	1.14151e+06		High	High	High	0	5.673e-06	2.74	57.33	Used
	TRUE	High	SDIDEIVLVGGSTR		FALSE	0.000169518	0	1	1	3	XP_863385.2	0	1460.76	0	0.537	0.800976	0	130.1	69.9	1.21758e+06	654229		High	High	High	0	2.118e-05	3.17	50.3	Used
	TRUE	High	TKPYIQVDIGGGQTK		FALSE	8.21089e-05	0	1	1	5	XP_863385.2	0	1604.86	0	0.488	0.73767	0	134.5	65.5	17163250	8.36748e+06		High	High	High	0	9.225e-05	3.8	31.36	Used
	TRUE	High	SQIFSTASDNQPTVTIK		FALSE	4.93218e-07	0	1	1	4	XP_863385.2	0	1836.93	0	0.84	0.971875	0	108.7	91.3	8.3806e+06	7.0415e+06		High	High	High	0	1.375e-07	4.3	38.11	Used
	TRUE	High	LYGSAGPPPTGDEEPADKDEL		FALSE	7.63e-07	0	1	1	8	XP_863385.2	1	2157.98	0	0.661	0.88904	0	120.4	79.6	1.61602e+07	1.06804e+07		High	High	High	0	6.201e-07	4.77	32.81	Used
	TRUE	High	MKETAEAYLGKK	1xOxidation [M1]	FALSE	0.000191287	0	1	1	1	XP_863385.2	2	1384.71	0	0.405	0.651217	0	142.4	57.6	79951.5	32346.3		High	Peak Found	High	0	2.346e-05	3.36	14.4	Used
	TRUE	High	TWNDPSVQQDIK		FALSE	0.000151238	0	1	1	3	XP_863385.2	0	1430.69	0	0.408	0.627477	0	142	58	10916543	4.45931e+06		High	High	High	0	1.915e-05	2.89	28.92	Used
	TRUE	High	NQLTSNPENTVFDAK		FALSE	0.000354691	0	1	1	4	XP_863385.2	0	1677.81	0	0.676	0.89828	0	119.3	80.7	7991992	5.40211e+06		High	High	High	0.0002019	0.001019	3.23	33.6	Used
	TRUE	High	VTHAVVTVPAYFNDAQR		FALSE	9.51749e-05	0	1	1	5	XP_863385.2	0	1887.97	0	0.518	0.778249	0	131.7	68.3	7.88466e+06	4.08813e+06		High	High	High	0	1.287e-05	3.29	44.02	Used
	TRUE	High	DNHLLGTFDLTGIPPAPR		FALSE	3.87255e-06	0	1	1	8	XP_863385.2	0	1934.01	0	0.01	9.75497e-17		200		3.58166e+06			High	High	High	0	8.136e-07	3.34	72.26	Used
	TRUE	High	DNHLLGTFDLTGIPPAPR	1xDeamidated [N2]	FALSE	0.000139534	0	1	1	2	XP_863385.2	0	1935	0								No Quan Values	High	Not Found	High	0	1.785e-05	3.54		Not Used
	TRUE	High	VTHAVVTVPAYFNDAQR	1xDeamidated [N/Q]	FALSE	0.000260478	0	1	1	4	XP_863385.2	0	1888.96	0								Not Reliable	High	Not Found	High	0	7.905e-05	3.58		Not Used
	TRUE	High	DAGTIAGLNVMR	1xOxidation [M11]	FALSE	4.00472e-06	0	1	1	2	XP_863385.2	0	1233.63	0	0.552	0.815017	0	128.9	71.1	15394353	8494855		High	High	High	0	8.393e-07	4.08	30.94	Used
	TRUE	High	MKETAEAYLGKK		FALSE	0.0119592	0.000480221	1	1	3	XP_863385.2	2	1368.72	0	0.351	0.532637	0	148	52	173954	61118.2		High	High	High	0.0001485	0.0006317	2.56	16.48	Used
	TRUE	High	AKFEELNMDLFR	1xOxidation [M8]	FALSE	0.00363587	0.000480221	1	1	3	XP_863385.2	1	1528.75	0	0.659	0.888223	0	120.5	79.5	2632687	1.73609e+06		High	High	High	0.0001485	0.0002404	2.9	47.94	Used
	TRUE	High	AKFEELNMDLFR		FALSE	0.0106054	0.000480221	1	1	1	XP_863385.2	1	1512.75	0								No Quan Values	High	Not Found	High	0.0001485	0.0005577	1.94		Not Used
	TRUE	High	AVEEKIEWLESHQDADIEDFKAK		FALSE	0.00633836	0.000480221	1	1	3	XP_863385.2	2	2730.33	0	0.499	0.754222	0	133.5	66.5	3392143	1.69139e+06		High	High	High	0.0002019	0.000992	3.14	56.99	Used
	TRUE	High	NELESYAYSLK		FALSE	0.0073434	0.000480221	1	1	1	XP_863385.2	0	1316.64	0	0.455	0.697308	0	137.5	62.5	1.09859e+06	499317		High	Peak Found	High	0.0001485	0.0004002	2.02	43.19	Used
	TRUE	High	NQLTSNPENTVFDAKR		FALSE	0.00421317	0.000480221	1	1	4	XP_863385.2	1	1833.91	0	0.501	0.757224	0	133.3	66.7	3.02124e+07	1.51225e+07		High	High	High	0.0001485	0.0003736	2.86	30.54	Used
	TRUE	High	KTKPYIQVDIGGGQTK	1xDeamidated [Q]	FALSE	0.0127842	0.000480221	1	1	2	XP_863385.2	1	1733.94	0								No Quan Values	High	Not Found	High	0.0001485	0.0006757	2.47		Not Used
	TRUE	High	ITPSYVAFTPEGER		FALSE	0.00279974	0.000480221	1	1	5	XP_863385.2	0	1566.78	0	0.696	0.90237	0	117.9	82.1	7.27988e+06	5065795		High	High	High	0.0001485	0.0002014	3.04	42.2	Used
	TRUE	High	ELEEIVQPIISK		FALSE	0.00739268	0.000480221	1	1	3	XP_863385.2	0	1397.79	0	0.279	0.323855	0	156.3	43.7	3.64491e+06	1.01792e+06		High	High	High	0.0001485	0.0004103	2.77	50.45	Used
	TRUE	High	NQLTSNPENTVFDAKR	2xDeamidated [N1; N6]	FALSE	0.0470051	0.00101489	1	1	1	XP_863385.2	1	1835.88	0								Not Reliable	High	Not Found	High	0.000303	0.004447	2.1		Not Used
	TRUE	High	TKPYIQVDIGGGQTK	1xDeamidated [Q]	FALSE	0.0361898	0.00101489	1	1	2	XP_863385.2	0	1605.85	0								No Quan Values	High	Not Found	High	0.000303	0.002791	1.7		Not Used
	TRUE	High	MKETAEAYLGK		FALSE	0.0812278	0.00309549	1	1	1	XP_863385.2	1	1240.62	0								No Quan Values	High	Not Found	High	0.001025	0.01215	2.83		Not Used
	TRUE	High	MVNDAEKFAEEDKK		FALSE	0.0827874	0.00326873	1	1	1	XP_863385.2	2	1653.78	0	0.114	0.0437524	0	179.5	20.5	99635.7	11349.3		High	Peak Found	High	0.001074	0.0126	2.29	17.87	Used
	TRUE	High	SQIFSTASDNQPTVTIK	1xDeamidated [N/Q]	FALSE	0.0887481	0.00400093	1	1	2	XP_863385.2	0	1837.92	0								No Quan Values	Not Found	High	High	0.001341	0.01434	1.74		Not Used
	TRUE	High	KVTHAVVTVPAYFNDAQR		FALSE	0.132032	0.00674258	1	1	2	XP_863385.2	1	2016.07	0								Not Reliable	High	High	High	0.002471	0.03357	1.95		Not Used
	TRUE	High	TFAPEEISAMVLTK		FALSE	0.13946	0.0068648	1	1	1	XP_863385.2	0	1536.8	0								No Quan Values	High	Not Found	High	0.002471	0.03111	2.05		Not Used
	TRUE	High	ITITNDQNRLTPEEIER	1xDeamidated [Q/N]	FALSE	0.146375	0.0068648	1	1	5	XP_863385.2	1	2043.04	0								No Quan Values	High	High	High	0.002471	0.03379	2.28		Not Used
	TRUE	High	AVEEKIEWLESHQDADIEDFKAK	1xDeamidated [Q13]	FALSE	0.16306	0.00869234	1	1	2	XP_863385.2	2	2731.31	0								Not Reliable	High	High	High	0.00387	0.04958	3.21		Not Used
	TRUE	High	KSQIFSTASDNQPTVTIK	1xDeamidated [Q]	FALSE	0.164035	0.00869234	1	1	2	XP_863385.2	1	1966.01	0								Not Reliable	High	Not Found	High	0.003917	0.05077	3.63		Not Used
TRUE	High	Master Protein	XP_856151.2	tubulin beta-2B chain [Canis lupus familiaris]	0	FALSE	204.17	62	20	161	1	1	445	49.9	4.89	331.31	20	1	6.534	0.113817	0	26.5	173.5	92761.9	606115	Not Found	High
	Checked	Confidence	Sequence	Modifications	Contaminant	Qvality PEP	Qvality q-value	# Protein Groups	# Proteins	# PSMs	Master Protein Accessions	# Missed Cleavages	Theo. MH+ [Da]	# Razor Quan Results	Abundance Ratio: (F4, Sample) / (F3, Control)	Abundance Ratio Adj. P-Value: (F4, Sample) / (F3, Control)	Abundance Ratio Variability [%]: (F4, Sample) / (F3, Control)	Abundances (Grouped): F3, Control	Abundances (Grouped): F4, Sample	Abundance: F3: Control	Abundance: F4: Sample	Quan Info	Found in Sample: [S3] F3: Control	Found in Sample: [S4] F4: Sample	Confidence (by Search Engine): Sequest HT	Percolator q-Value (by Search Engine): Sequest HT	Percolator PEP (by Search Engine): Sequest HT	XCorr (by Search Engine): Sequest HT	Top Apex RT [min]	Quan Usage
	TRUE	High	LHFFMPGFAPLTSR	1xOxidation [M5]	FALSE	0.000374255	0	4	8	7	XP_005635298.2; XP_532060.4; XP_005625117.1; XP_856151.2	0	1636.83	0	0.803	0.952941	0	110.9	89.1	10972373	8.81559e+06	Shared	High	High	High	0.0001092	0.0001823	3.43	65.68	Not Used
	TRUE	High	ISEQFTAMFR	1xOxidation [M8]	FALSE	5.90949e-05	0	3	8	6	XP_532060.4; XP_005625117.1; XP_856151.2	0	1245.59	0	1.05	0.988634	0	97.6	102.4	5.43514e+06	5.70501e+06	Shared	High	High	High	0	8.546e-06	3.63	38.43	Not Used
	TRUE	High	SGPFGQIFRPDNFVFGQSGAGNNWAK		FALSE	1.06039e-07	0	3	6	4	XP_532060.4; XP_005625117.1; XP_856151.2	0	2798.34	0	0.774	0.937776	0	112.8	87.2	3.56232e+06	2.75598e+06	Shared	High	High	High	0	3.659e-08	5.35	85.17	Not Used
	TRUE	High	SGPFGQIFRPDNFVFGQSGAGNNWAK	1xDeamidated [N/Q]	FALSE	2.76907e-07	0	3	6	7	XP_532060.4; XP_005625117.1; XP_856151.2	0	2799.33	0								Not Reliable	High	High	High	0	8.342e-08	5.59		Not Used
	TRUE	High	SGPFGQIFRPDNFVFGQSGAGNNWAK	2xDeamidated [Q/N]	FALSE	0.000147232	0	3	6	2	XP_532060.4; XP_005625117.1; XP_856151.2	0	2800.31	0								Not Reliable	High	Not Found	High	0	1.87e-05	4.19		Not Used
	TRUE	High	LTTPTYGDLNHLVSATMSGVTTCLR	1xCarbamidomethyl [C23]; 1xOxidation [M17]	FALSE	0.00162663	0	3	6	3	XP_532060.4; XP_005625117.1; XP_856151.2	0	2724.33	0	0.854	0.971875	0	107.9	92.1	4.0589e+06	3.46624e+06	Shared	High	High	High	0	0.0001361	2.7	72.29	Not Used
	TRUE	High	NSSYFVEWIPNNVK	1xDeamidated [N1]	FALSE	0.000742058	0	4	10	1	XP_860433.2; XP_532060.4; XP_005625117.1; XP_856151.2	0	1697.82	0								Not Reliable	Not Found	High	High	0	7.326e-05	2.74		Not Used
	TRUE	High	MREIVHLQAGQCGNQIGAK	1xCarbamidomethyl [C12]; 1xDeamidated [Q/N]; 1xOxidation [M1]	FALSE	0.000167258	0	3	6	46	XP_532060.4; XP_005625117.1; XP_856151.2	1	2127.04	0	1.348	0.929628	0	85.2	114.8	366901	494675	Shared	High	High	High	0	3.861e-05	4.52	24.3	Not Used
	TRUE	High	MSATFIGNSTAIQELFK	1xOxidation [M1]	FALSE	0.000145268	0	2	5	2	XP_005625117.1; XP_856151.2	0	1873.94	1	2.091	0.757224	0	64.7	135.3	266355	557080	Shared	High	High	High	0	0.0001101	2.86	82.51	Not Used
	TRUE	High	MSMKEVDEQMLNVQNK	2xOxidation [M3; M]	FALSE	0.000159581	0	3	7	11	XP_532060.4; XP_005625117.1; XP_856151.2	1	1955.89	0	3.461	0.348904	0	44.8	155.2	737600	2.55313e+06	Shared	High	High	High	0	9.338e-05	3.39	25.33	Not Used
	TRUE	High	MREIVHLQAGQCGNQIGAK	1xCarbamidomethyl [C12]; 1xOxidation [M1]	FALSE	5.79432e-07	0	3	6	26	XP_532060.4; XP_005625117.1; XP_856151.2	1	2126.06	0	2.426	0.634348	0	58.4	141.6	5.17268e+06	1.25487e+07	Shared	High	High	High	0	1.583e-07	4.77	22.99	Not Used
	TRUE	High	EVDEQMLNVQNK		FALSE	0.000333901	0	3	7	2	XP_532060.4; XP_005625117.1; XP_856151.2	0	1446.69	0	2.398	0.641998	0	58.9	141.1	1.07121e+06	2.56866e+06	Shared	High	High	High	0	3.769e-05	3.77	26.29	Not Used
	TRUE	High	VSDTVVEPYNATLSVHQLVENTDETYCIDNEALYDICFR	2xCarbamidomethyl [C27; C37]; 3xDeamidated [N21; N30; N/Q]	FALSE	0.000772541	0	4	6	2	XP_860433.2; XP_532060.4; XP_005625117.1; XP_856151.2	0	4596.06	0								No Quan Values	High	Not Found	High	0	7.568e-05	3.08		Not Used
	TRUE	High	EIVHLQAGQCGNQIGAK	1xCarbamidomethyl [C10]	FALSE	2.65857e-05	0	3	6	20	XP_532060.4; XP_005625117.1; XP_856151.2	0	1822.92	0	2.073	0.737591	0	65.1	134.9	3.37798e+06	7.00257e+06	Shared	High	High	High	0	4.305e-06	3.63	25.18	Not Used
	TRUE	High	GHYTEGAELVDSVLDVVRK		FALSE	0.000227758	0	3	6	5	XP_532060.4; XP_005625117.1; XP_856151.2	1	2087.08	0	0.608	0.85773	0	124.3	75.7	5.44537e+06	3.31284e+06	Shared	High	High	High	0	2.716e-05	3.73	81.66	Not Used
	TRUE	High	GHYTEGAELVDSVLDVVR		FALSE	1.62943e-07	0	3	6	6	XP_532060.4; XP_005625117.1; XP_856151.2	0	1958.98	0	0.729	0.917227	0	115.7	84.3	4.37495e+06	3.19068e+06	Shared	High	High	High	0	2.429e-07	4.17	86.01	Not Used
	TRUE	High	AILVDLEPGTMDSVR	1xOxidation [M11]	FALSE	1.61781e-05	0	2	4	4	XP_532060.4; XP_856151.2	0	1631.83	0	0.984	0.994173	0	100.8	99.2	4765582	4688321	Shared	High	High	High	0	2.794e-06	2.88	49.02	Not Used
	TRUE	High	MREIVHLQAGQCGNQIGAK	1xCarbamidomethyl [C12]; 2xDeamidated [Q/N]; 1xOxidation [M1]	FALSE	0.00525511	0.000480221	3	6	4	XP_532060.4; XP_005625117.1; XP_856151.2	1	2128.03	0								Not Reliable	High	Not Found	High	0.0001485	0.0003106	3.93		Not Used
	TRUE	High	MSATFIGNSTAIQELFKR	1xDeamidated [N8]; 1xOxidation [M1]	FALSE	0.00885519	0.000480221	2	4	1	XP_005625117.1; XP_856151.2	1	2031.02	0								No Quan Values	Not Found	High	High	0.0001485	0.0004699	1.54		Not Used
	TRUE	High	MSMKEVDEQMLNVQNK	1xDeamidated [Q/N]; 2xOxidation [M3; M10]	FALSE	0.00394021	0.000480221	3	7	4	XP_532060.4; XP_005625117.1; XP_856151.2	1	1956.87	0								Not Reliable	Not Found	High	High	0.0002019	0.000994	1.77		Not Used
	TRUE	High	MSMKEVDEQMLNVQNK	3xOxidation [M1; M3; M10]	FALSE	0.00307513	0.000480221	3	7	2	XP_532060.4; XP_005625117.1; XP_856151.2	1	1971.88	0	4.453	0.280549	0	36.7	163.3	79633.4	354593	Shared	High	High	High	0.0001485	0.0005395	2.95	15.87	Not Used
	TRUE	High	NSSYFVEWIPNNVK		FALSE	0.00315866	0.000480221	4	10	4	XP_860433.2; XP_532060.4; XP_005625117.1; XP_856151.2	0	1696.83	0	1.405	0.907898	0	83.2	116.8	1.52705e+06	2.14492e+06	Shared	High	High	High	0.0001485	0.0002965	2.51	70.43	Not Used
	TRUE	High	FWEVISDEHGIDPTGSYHGDSDLQLER	1xDeamidated [Q24]	FALSE	0.0145105	0.000480221	1	1	1	XP_856151.2	0	3103.39	0								No Quan Values	Not Found	High	High	0.0001485	0.0007757	3.33		Not Used
	TRUE	High	VSDTVVEPYNATLSVHQLVENTDETYCIDNEALYDICFR	2xCarbamidomethyl [C27; C37]; 2xDeamidated [N/Q]	FALSE	0.0143184	0.000480221	4	6	3	XP_860433.2; XP_532060.4; XP_005625117.1; XP_856151.2	0	4595.08	0								No Quan Values	High	Not Found	High	0.0006972	0.009285	2.6		Not Used
	TRUE	High	ISEQFTAMFR		FALSE	0.00686826	0.000480221	3	8	1	XP_532060.4; XP_005625117.1; XP_856151.2	0	1229.6	0	1.342	0.929628	0	85.4	114.6	390488	523890	Shared	Peak Found	High	High	0.0001485	0.0003797	1.92	54.96	Not Used
	TRUE	High	LTTPTYGDLNHLVSATMSGVTTCLR	1xCarbamidomethyl [C23]; 1xDeamidated [N10]; 1xOxidation [M17]	FALSE	0.00714954	0.000480221	3	6	2	XP_532060.4; XP_005625117.1; XP_856151.2	0	2725.32	0								Not Reliable	High	Not Found	High	0.0001485	0.0003921	3.26		Not Used
	TRUE	High	LTTPTYGDLNHLVSATMSGVTTCLR	1xCarbamidomethyl [C23]; 1xDeamidated [N10]	FALSE	0.00326628	0.000480221	3	6	1	XP_532060.4; XP_005625117.1; XP_856151.2	0	2709.32	0								Not Reliable	High	Not Found	High	0.0001485	0.0002235	4.07		Not Used
	TRUE	High	EIVHIQAGQCGNQIGAK	1xCarbamidomethyl [C10]; 1xDeamidated [N/Q]	FALSE	0.00515061	0.000480221	3	6	10	XP_532060.4; XP_005625117.1; XP_856151.2	0	1823.91	0								No Quan Values	High	High	High	0.0001485	0.0003062	3.61		Not Used
	TRUE	High	EVDEQMLNVQNK	1xOxidation [M6]	FALSE	0.0126148	0.000480221	3	7	2	XP_532060.4; XP_005625117.1; XP_856151.2	0	1462.68	0								No Quan Values	High	High	High	0.0001485	0.0006664	1.83		Not Used
	TRUE	High	IMNTFSVMPSPK	2xOxidation [M2; M8]	FALSE	0.020508	0.000666919	2	3	1	XP_860433.2; XP_856151.2	0	1383.66	0	6.534	0.0949268	0	26.5	173.5	92761.9	606115	Shared	Peak Found	High	High	0.0002019	0.001186	1.48	27.08	Used
	TRUE	High	MSATFIGNSTAIQELFKR	1xOxidation [M1]	FALSE	0.0180756	0.000666919	2	4	1	XP_005625117.1; XP_856151.2	1	2030.04	0								No Quan Values	High	Not Found	High	0.0002019	0.001009	2.8		Not Used
	TRUE	High	MSMKEVDEQMLNVQNK	1xOxidation [M10]	FALSE	0.047312	0.00101489	3	7	2	XP_532060.4; XP_005625117.1; XP_856151.2	1	1939.89	0	0.792	0.930056	0	111.6	88.4	164273	130116	Shared	High	Peak Found	High	0.000303	0.004461	2.71	28.67	Not Used
	TRUE	High	VSDTVVEPYNATLSVHQLVENTDETYCIDNEALYDICFR	2xCarbamidomethyl [C27; C37]; 1xDeamidated [N30]	FALSE	0.0449095	0.00101489	4	6	1	XP_860433.2; XP_532060.4; XP_005625117.1; XP_856151.2	0	4594.09	0								No Quan Values	High	Not Found	High	0.000303	0.004084	2.98		Not Used
TRUE	High	Master Protein	XP_005632479.1	transketolase [Canis lupus familiaris]	0	FALSE	198.433	48	20	116	20	1	576	63.1	7.15	211.83	20	0	0.626	0.734798	8.31	118.3	81.7	1.21908e+08	8.41748e+07	High	High
	Checked	Confidence	Sequence	Modifications	Contaminant	Qvality PEP	Qvality q-value	# Protein Groups	# Proteins	# PSMs	Master Protein Accessions	# Missed Cleavages	Theo. MH+ [Da]	# Razor Quan Results	Abundance Ratio: (F4, Sample) / (F3, Control)	Abundance Ratio Adj. P-Value: (F4, Sample) / (F3, Control)	Abundance Ratio Variability [%]: (F4, Sample) / (F3, Control)	Abundances (Grouped): F3, Control	Abundances (Grouped): F4, Sample	Abundance: F3: Control	Abundance: F4: Sample	Quan Info	Found in Sample: [S3] F3: Control	Found in Sample: [S4] F4: Sample	Confidence (by Search Engine): Sequest HT	Percolator q-Value (by Search Engine): Sequest HT	Percolator PEP (by Search Engine): Sequest HT	XCorr (by Search Engine): Sequest HT	Top Apex RT [min]	Quan Usage
	TRUE	High	LGQSDPTPLQHQVDVYQK		FALSE	0.000230836	0	1	1	4	XP_005632479.1	0	2053.03	0	0.862	0.971875	0	107.4	92.6	2.39212e+07	2.06269e+07		High	High	High	0.0001485	0.0006114	2.94	31.3	Used
	TRUE	High	LGQSDPTPLQHQVDVYQK	1xDeamidated [Q]	FALSE	1.96547e-05	0	1	1	5	XP_005632479.1	0	2054.02	0								Not Reliable	High	High	High	0	3.314e-06	3.76		Not Used
	TRUE	High	LGQSDPTPLQHQVDVYQKR	1xDeamidated [Q]	FALSE	0.00121096	0	1	1	2	XP_005632479.1	1	2210.12	0								Not Reliable	High	Not Found	High	0.0004148	0.006565	2.26		Not Used
	TRUE	High	LDNLIAILDINR		FALSE	0.000114085	0	1	1	1	XP_005632479.1	0	1382.8	0	0.626	0.874475	0	123	77	2040126	1.27781e+06		High	Peak Found	High	0	1.503e-05	2.88	87	Used
	TRUE	High	ILVTPPQEDAPSVNITNIR		FALSE	6.19661e-07	0	1	1	7	XP_005632479.1	0	2077.13	0	0.64	0.877459	0	122	78	15175540	9.70759e+06		High	High	High	0	1.672e-07	5.01	57.29	Used
	TRUE	High	ILVTPPQEDAPSVNITNIR	1xDeamidated [Q/N]	FALSE	0.000115627	0	1	1	7	XP_005632479.1	0	2078.11	0								No Quan Values	High	High	High	0.0001092	0.0001797	3.34		Not Used
	TRUE	High	KITSDLDGHPVPK		FALSE	0.00168209	0	1	1	2	XP_005632479.1	1	1406.76	0	0.385	0.604621	0	144.4	55.6	497884	191699		High	Peak Found	High	0	0.00014	2.38	16.4	Used
	TRUE	High	QAFTDVATGSLGQGLGAACGMAYTGK	1xCarbamidomethyl [C19]; 1xOxidation [M21]	FALSE	1.30509e-05	0	1	1	4	XP_005632479.1	0	2548.18	0	0.654	0.885998	0	120.9	79.1	1.87258e+06	1.22415e+06		High	High	High	0	2.327e-06	4.66	55.68	Used
	TRUE	High	QAFTDVATGSLGQGLGAACGMAYTGK	1xCarbamidomethyl [C19]; 1xDeamidated [Q]; 1xOxidation [M21]	FALSE	3.12329e-05	0	1	1	3	XP_005632479.1	0	2549.16	0								Not Reliable	High	High	High	0	4.922e-06	4.16		Not Used
	TRUE	High	SIPTATIFYPSDGVSTEK		FALSE	0.000419485	0	1	1	4	XP_005632479.1	0	1912.95	0	0.738	0.922256	0	115.1	84.9	7.22087e+06	5328713		High	High	High	0	4.557e-05	3.01	53.16	Used
	TRUE	High	SKDDQVTVIGAGVTLHEALAAAELLK	1xDeamidated [Q5]	FALSE	4.64093e-05	0	1	1	2	XP_005632479.1	1	2650.43	0								No Quan Values	High	High	High	0	6.923e-06	4.38		Not Used
	TRUE	High	SKDDQVTVIGAGVTLHEALAAAELLKK		FALSE	8.89962e-05	0	1	1	5	XP_005632479.1	2	2777.54	0	0.591	0.848194	0	125.7	74.3	1.32599e+07	7.8404e+06		High	High	High	0.0001485	0.0003097	3.81	93.12	Used
	TRUE	High	SKDDQVTVIGAGVTLHEALAAAELLKK	1xDeamidated [Q5]	FALSE	4.96314e-05	0	1	1	1	XP_005632479.1	2	2778.52	0								Not Reliable	High	Not Found	High	0	7.37e-06	4.07		Not Used
	TRUE	High	IVTVEDHYYEGGIGEAVSSALVGEPGITVSR		FALSE	0.00041668	0	1	1	3	XP_005632479.1	0	3204.61	0	0.63	0.876904	0	122.7	77.3	9687270	6.10375e+06		High	High	High	0.0001485	0.0003595	3.17	78.61	Used
	TRUE	High	TSRPENAIIYNNNEDFQIK	1xDeamidated [N/Q]	FALSE	5.23694e-05	0	1	1	8	XP_005632479.1	0	2267.09	0								Not Reliable	High	Not Found	High	0	7.256e-05	4.5		Not Used
	TRUE	High	TSRPENAIIYNNNEDFQIK		FALSE	9.51749e-05	0	1	1	6	XP_005632479.1	0	2266.11	0	0.667	0.893446	0	120	80	7.36824e+06	4.91351e+06		High	High	High	0	0.0001247	3.63	41.96	Used
	TRUE	High	MFGIDRDAIAQAVR	1xOxidation [M1]	FALSE	0.00137554	0	1	1	1	XP_005632479.1	1	1578.81	0	0.593	0.848492	0	125.6	74.4	3.34114e+06	1.98069e+06		High	Peak Found	High	0	0.0001201	2.91	45.79	Used
	TRUE	High	TVPFCSAFGAFFTR	1xCarbamidomethyl [C5]	FALSE	0.000489499	0	1	1	4	XP_005632479.1	0	1607.77	0	0.679	0.89828	0	119.1	80.9	4013327	2.72372e+06		High	High	High	0.0001485	0.0005646	2.45	91.07	Used
	TRUE	High	ITSDLDGHPVPK		FALSE	0.000675523	0	1	1	4	XP_005632479.1	0	1278.67	0	0.196	0.130478	0	167.2	32.8	1.00474e+06	197006		High	High	High	0	6.778e-05	2.04	17.72	Used
	TRUE	High	NMADQIVQEIYNQIQSQK	1xOxidation [M2]	FALSE	7.18112e-06	0	1	1	4	XP_005632479.1	0	2166.05	0								No Quan Values	High	High	High	0	2.41e-06	3.69		Not Used
	TRUE	High	NMADQIVQEIYNQIQSQK	1xDeamidated [Q/N]; 1xOxidation [M2]	FALSE	1.32273e-05	0	1	1	2	XP_005632479.1	0	2167.03	0								Not Reliable	High	Not Found	High	0	1.201e-05	3.37		Not Used
	TRUE	High	NMADQIVQEIYNQIQSQKK	1xOxidation [M2]	FALSE	3.25164e-05	0	1	1	4	XP_005632479.1	1	2294.14	0	0.537	0.800706	0	130.1	69.9	5.58624e+06	2.99893e+06		High	High	High	0	5.104e-06	3.45	93.15	Used
	TRUE	High	NMADQIVQEIYNQIQSQKK	1xDeamidated [Q/N]; 1xOxidation [M2]	FALSE	0.000798898	0	1	1	10	XP_005632479.1	1	2295.13	0								No Quan Values	High	High	High	0.0001485	0.0003584	2.82		Not Used
	TRUE	High	GHAAPILYAVWAEAGFLTEEELLNLRK		FALSE	4.39931e-06	0	1	1	3	XP_005632479.1	1	3011.6	0	0.461	0.706678	0	136.8	63.2	5.12581e+06	2.36537e+06		High	High	High	0	9.078e-07	3.25	133.53	Used
	TRUE	High	NMADQIVQEIYNQIQSQKK	1xDeamidated [Q8]	FALSE	0.00261825	0.000331607	1	1	1	XP_005632479.1	1	2279.13	0								Not Reliable	High	Not Found	High	0.0001092	0.0001924	2.92		Not Used
	TRUE	High	LGQSDPTPLQHQVDVYQKR		FALSE	0.00230517	0.000331607	1	1	5	XP_005632479.1	1	2209.14	0	0.79	0.945696	0	111.8	88.2	14843610	1.17192e+07		High	High	High	0.0001485	0.0002075	2.61	29.62	Used
	TRUE	High	VLDPFTIKPLDR		FALSE	0.00511624	0.000480221	1	1	4	XP_005632479.1	0	1413.81	0	0.886	0.9743	0	106	94	4626192	4.10007e+06		High	High	High	0.0001485	0.000305	2.73	57.03	Used
	TRUE	High	KILVTPPQEDAPSVNITNIR	1xDeamidated [Q/N]	FALSE	0.0134847	0.000480221	1	1	3	XP_005632479.1	1	2206.21	0								No Quan Values	High	High	High	0.001436	0.01646	2.8		Not Used
	TRUE	High	KILVTPPQEDAPSVNITNIR		FALSE	0.00453528	0.000480221	1	1	2	XP_005632479.1	1	2205.22	0	0.572	0.831903	0	127.2	72.8	1.24349e+06	711659		High	High	High	0.0001485	0.0002791	2.67	50.16	Used
	TRUE	High	GHAAPILYAVWAEAGFLTEEELLNLRK	1xDeamidated [N24]	FALSE	0.00349262	0.000480221	1	1	2	XP_005632479.1	1	3012.58	0								Not Reliable	High	High	High	0.0001485	0.0002344	3.79		Not Used
	TRUE	High	SKDDQVTVIGAGVTLHEALAAAELLK		FALSE	0.00291461	0.000480221	1	1	2	XP_005632479.1	1	2649.45	0	0.135	0.0387095	0	176.1	23.9	922133	124903		High	High	High	0.0001485	0.0002073	4.01	100.05	Used
	TRUE	High	LAVGEVPR		FALSE	0.0189367	0.000666919	1	1	1	XP_005632479.1	0	840.494	0	0.245	0.300925	0	160.6	39.4	157952	38692.7		High	Peak Found	High	0.0002019	0.001073	1.39	20.86	Used
TRUE	High	Master Protein	NP_001003142.2	glyceraldehyde-3-phosphate dehydrogenase [Canis lupus familiaris]	0	FALSE	193.685	75	18	139	9	1	333	35.8	8.13	333.91	18	11	0.98	0.955956	60.47	96.7	103.3	2.46939e+08	2.63563e+08	High	High
	Checked	Confidence	Sequence	Modifications	Contaminant	Qvality PEP	Qvality q-value	# Protein Groups	# Proteins	# PSMs	Master Protein Accessions	# Missed Cleavages	Theo. MH+ [Da]	# Razor Quan Results	Abundance Ratio: (F4, Sample) / (F3, Control)	Abundance Ratio Adj. P-Value: (F4, Sample) / (F3, Control)	Abundance Ratio Variability [%]: (F4, Sample) / (F3, Control)	Abundances (Grouped): F3, Control	Abundances (Grouped): F4, Sample	Abundance: F3: Control	Abundance: F4: Sample	Quan Info	Found in Sample: [S3] F3: Control	Found in Sample: [S4] F4: Sample	Confidence (by Search Engine): Sequest HT	Percolator q-Value (by Search Engine): Sequest HT	Percolator PEP (by Search Engine): Sequest HT	XCorr (by Search Engine): Sequest HT	Top Apex RT [min]	Quan Usage
	TRUE	High	VDIVAINDPFIDLNYMVYMFQYDSTHGK	1xDeamidated [N/Q]; 2xOxidation [M16; M19]	FALSE	0.000168384	0	2	3	2	XP_534639.3; NP_001003142.2	0	3341.54	0								Not Reliable	High	Not Found	High	0	2.106e-05	3.69		Not Used
	TRUE	High	VDIVAINDPFIDLNYMVYMFQYDSTHGK	2xOxidation [M16; M19]	FALSE	2.64138e-06	0	2	3	3	XP_534639.3; NP_001003142.2	0	3340.55	0	0.564	0.825563	0	127.9	72.1	7.0453e+06	3.97213e+06	Shared	High	High	High	0	5.857e-07	4.3	106.16	Used
	TRUE	High	VDIVAINDPFIDLNYMVYMFQYDSTHGK	1xDeamidated [Q/N]; 1xOxidation [M]	FALSE	0.00058281	0	2	3	5	XP_534639.3; NP_001003142.2	0	3325.54	0	0.192	0.12422	0	167.7	32.3	974649	187509	Shared	High	High	High	0	7.553e-05	3.27	130.8	Used
	TRUE	High	LISWYDNEFGYSNR		FALSE	2.58814e-05	0	2	4	8	XP_534639.3; NP_001003142.2	0	1763.8	0	0.975	0.992262	0	101.3	98.7	12330856	12023326	Shared	High	High	High	0	1.1e-05	3.81	61.35	Used
	TRUE	High	VIISAPSADAPMFVMGVNHEK	2xOxidation [M12; M15]	FALSE	0.00148086	0	2	6	3	XP_534639.3; NP_001003142.2	0	2245.1	0	0.993	0.997709	0	100.4	99.6	1.92434e+06	1910491	Shared	High	High	High	0.0002602	0.002152	2.45	43.86	Used
	TRUE	High	VIHDHFGIVEGLMTTVHAITATQK	1xDeamidated [Q23]; 1xOxidation [M13]	FALSE	1.51312e-06	0	1	5	6	NP_001003142.2	0	2635.35	0	9.41	0.0130823	0	19.2	180.8	279318	2.62832e+06		High	High	High	0	3.623e-07	5.21	76.18	Used
	TRUE	High	VIHDHFGIVEGLMTTVHAITATQK	1xOxidation [M13]	FALSE	7.04262e-09	0	1	5	13	NP_001003142.2	0	2634.37	0	1.453	0.900109	0	81.5	118.5	11701616	1.70037e+07		High	High	High	0	4.095e-09	5.23	74.89	Used
	TRUE	High	VIHDHFGIVEGLMTTVHAITATQK		FALSE	0.000411124	0	1	5	1	NP_001003142.2	0	2618.38	0	0.226	0.222327	0	163.1	36.9	749101	169548		High	Peak Found	High	0	4.488e-05	3.55	94.53	Used
	TRUE	High	RVIISAPSADAPMFVMGVNHEK	2xOxidation [M13; M16]	FALSE	0.000165027	0	2	6	4	XP_534639.3; NP_001003142.2	1	2401.2	0	1.152	0.972372	0	92.9	107.1	7.48411e+06	8.62386e+06	Shared	High	High	High	0.0001485	0.0002444	3.93	39.49	Used
	TRUE	High	SISIFQERDPANIK		FALSE	0.00061084	0	2	4	3	XP_534639.3; NP_001003142.2	1	1617.86	0	1.044	0.991149	0	97.8	102.2	40937376	42749644	Shared	High	High	High	0	7.279e-05	2.79	38.72	Used
	TRUE	High	IVSNASCTTNCLAPLAK	2xCarbamidomethyl [C7; C11]	FALSE	1.51312e-06	0	1	7	15	NP_001003142.2	0	1819.9	0	1.255	0.949395	0	88.7	111.3	8.63283e+07	1.08321e+08		High	High	High	0	3.619e-07	4.81	31.54	Used
	TRUE	High	IVSNASCTTNCLAPLAK	2xCarbamidomethyl [C7; C11]; 1xDeamidated [N]	FALSE	4.8981e-06	0	1	7	14	NP_001003142.2	0	1820.89	0	0.98	0.993774	0	101	99	7.51584e+06	7365336		High	High	High	0	2.239e-06	4.39	32.87	Used
	TRUE	High	WGDAGAEYVVESTGVFTTMEK	1xOxidation [M19]	FALSE	1.95362e-08	0	2	7	4	XP_534639.3; NP_001003142.2	0	2293.03	0	0.513	0.771522	0	132.2	67.8	2.80603e+06	1.43922e+06	Shared	High	High	High	0	8.464e-09	5.7	68.4	Used
	TRUE	High	VVDLMVHMASKE	1xOxidation [M]	FALSE	0.000405643	0	1	5	5	NP_001003142.2	1	1374.68	0	1.843	0.807415	0	70.3	129.7	2.13034e+06	3.92625e+06		High	High	High	0.0001092	0.0001591	3.03	26.99	Used
	TRUE	High	GILGYTEDQVVSCDFNSDTHSSTFDAGAGIALNDHFVK	1xCarbamidomethyl [C13]; 2xDeamidated [N33; Q/N]	FALSE	1.37709e-05	0	1	4	6	NP_001003142.2	0	4089.83	0								No Quan Values	High	High	High	0	5.412e-06	4.24		Not Used
	TRUE	High	GILGYTEDQVVSCDFNSDTHSSTFDAGAGIALNDHFVK	1xCarbamidomethyl [C13]; 1xDeamidated [N]	FALSE	1.73013e-05	0	1	4	5	NP_001003142.2	0	4088.85	0	0.717	0.900109	0	116.5	83.5	125105	89644.5		High	High	High	0	2.973e-06	3.87	149.18	Used
	TRUE	High	GILGYTEDQVVSCDFNSDTHSSTFDAGAGIALNDHFVK	1xCarbamidomethyl [C13]	FALSE	7.62648e-05	0	1	4	4	NP_001003142.2	0	4087.86	0	0.474	0.726658	0	135.7	64.3	3.32488e+06	1.57703e+06		High	High	High	0.0001485	0.0002403	3.46	76.33	Used
	TRUE	High	VPTPNVSVVDLTCR	1xCarbamidomethyl [C13]	FALSE	4.14045e-05	0	1	3	6	NP_001003142.2	0	1556.81	0	0.816	0.959098	0	110.1	89.9	3.21064e+07	2.61913e+07		High	High	High	0.0002019	0.001162	3.43	47.27	Used
	TRUE	High	GAAQNIIPASTGAAK		FALSE	4.19641e-05	0	1	6	6	NP_001003142.2	0	1369.74	0	1.444	0.901064	0	81.8	118.2	4.93842e+06	7.12986e+06		High	High	High	0	6.376e-06	3.29	21.98	Used
	TRUE	High	GAAQNIIPASTGAAK	1xDeamidated [Q/N]	FALSE	0.000527001	0	1	6	4	NP_001003142.2	0	1370.73	0	1.721	0.839139	0	73.5	126.5	499352	859447		High	High	High	0	5.523e-05	3.3	23.49	Used
	TRUE	High	VVDLMVHMASKE		FALSE	0.00188519	0.000331607	1	5	3	NP_001003142.2	1	1358.68	0	1.607	0.87102	0	76.7	123.3	656123	1.05442e+06		High	High	High	0.0001485	0.0002403	2.56	35.12	Used
	TRUE	High	RVIISAPSADAPMFVMGVNHEKYDNSLK	1xDeamidated [N]; 2xOxidation [M13; M16]	FALSE	0.00394021	0.000480221	2	6	2	XP_534639.3; NP_001003142.2	2	3122.53	0								Not Reliable	High	Not Found	High	0.0001485	0.0002542	3.32		Not Used
	TRUE	High	RVIISAPSADAPMFVMGVNHEK	1xDeamidated [N19]; 2xOxidation [M13; M16]	FALSE	0.00366031	0.000480221	2	6	3	XP_534639.3; NP_001003142.2	1	2402.18	0								Not Reliable	High	High	High	0.0001485	0.0002413	3.48		Not Used
	TRUE	High	VPTPNVSVVDLTCRLEK	1xCarbamidomethyl [C13]	FALSE	0.00381043	0.000480221	1	3	2	NP_001003142.2	1	1927.03	0	0.672	0.89828	0	119.6	80.4	1.60668e+07	1.08026e+07		High	Peak Found	High	0.0001485	0.000248	1.99	58.74	Used
	TRUE	High	LTGMAFRVPTPNVSVVDLTCR	1xCarbamidomethyl [C20]; 1xDeamidated [N12]; 1xOxidation [M4]	FALSE	0.00801036	0.000480221	1	3	1	NP_001003142.2	1	2350.19	0								No Quan Values	High	Not Found	High	0.0001485	0.0004323	3.37		Not Used
	TRUE	High	SISIFQERDPANIK	1xDeamidated [N/Q]	FALSE	0.00985426	0.000480221	2	4	2	XP_534639.3; NP_001003142.2	1	1618.84	0								Not Reliable	High	Not Found	High	0.0001485	0.0005196	2.4		Not Used
	TRUE	High	VVDLMVHMASKE	2xOxidation [M5; M8]	FALSE	0.005434	0.000480221	1	5	1	NP_001003142.2	1	1390.67	0	1.846	0.852006	0	70.3	129.7	135613	250365		Peak Found	High	High	0.0001485	0.0003181	1.45	17.54	Used
	TRUE	High	VIHDHFGIVEGLMTTVHAITATQK	1xDeamidated [Q23]	FALSE	0.0255215	0.000666919	1	5	1	NP_001003142.2	0	2619.36	0								Not Reliable	High	Not Found	High	0.0002019	0.001626	3.88		Not Used
	TRUE	High	RVIISAPSADAPMFVMGVNHEKYDNSLK	2xDeamidated [N19; N25]; 2xOxidation [M13; M16]	FALSE	0.0213411	0.000666919	2	6	1	XP_534639.3; NP_001003142.2	2	3123.51	0								Not Reliable	High	Not Found	High	0.0002019	0.001259	2.32		Not Used
	TRUE	High	VIISAPSADAPMFVMGVNHEK	1xDeamidated [N18]; 2xOxidation [M12; M15]	FALSE	0.0295131	0.000865703	2	6	2	XP_534639.3; NP_001003142.2	0	2246.08	0								Not Reliable	High	High	High	0.002348	0.02715	2.05		Not Used
	TRUE	High	VGVNGFGR		FALSE	0.0309067	0.000865703	1	2	1	NP_001003142.2	0	805.432	0	0.912	0.971875	0	104.6	95.4	45995.8	41951.1		High	Peak Found	High	0.0002602	0.002171	2.39	18.34	Used
	TRUE	High	RVIISAPSADAPMFVMGVNHEKYDNSLK	2xOxidation [M13; M16]	FALSE	0.0299049	0.000865703	2	6	1	XP_534639.3; NP_001003142.2	2	3121.54	0	0.63	0.876904	0	122.7	77.3	4334184	2.72932e+06	Shared	Peak Found	High	High	0.0002602	0.002062	1.85	43.75	Used
	TRUE	High	SISIFQER		FALSE	0.0431854	0.00101489	2	7	2	XP_534639.3; NP_001003142.2	0	979.521	0	1.937	0.776751	0	68.1	131.9	982333	1.90283e+06	Shared	High	High	High	0.000303	0.003788	1.57	34.13	Used
	TRUE	High	VDIVAINDPFIDLNYMVYMFQYDSTHGK	1xOxidation [M19]	FALSE	0.0593607	0.00139497	2	3	1	XP_534639.3; NP_001003142.2	0	3324.56	0	0.01	9.75497e-17		200		544349		Shared	High	Not Found	High	0.0004148	0.006797	3.08	128.69	Used
	TRUE	High	RVIISAPSADAPMFVMGVNHEK	1xOxidation [M16]	FALSE	0.053874	0.00139497	2	6	2	XP_534639.3; NP_001003142.2	1	2385.21	0	0.632	0.876904	0	122.6	77.4	972123	613921	Shared	High	High	High	0.0004148	0.006799	3.44	46.54	Used
	TRUE	High	VDIVAINDPFIDLNYMVYMFQYDSTHGKFHGTVK	2xDeamidated [N14; Q21]; 2xOxidation [M16; M19]	FALSE	0.0728982	0.00234546	2	3	1	XP_534639.3; NP_001003142.2	1	4011.88	0								No Quan Values	High	Not Found	High	0.0007517	0.009912	2.93		Not Used
TRUE	High	Master Protein	XP_022280742.1	gelsolin [Canis lupus familiaris]	0	FALSE	191.119	40	20	132	20	1	805	88	8.15	284.52	20	0	0.944	0.955956	34.13	94.4	105.6	1.29248e+08	1.44558e+08	High	High
	Checked	Confidence	Sequence	Modifications	Contaminant	Qvality PEP	Qvality q-value	# Protein Groups	# Proteins	# PSMs	Master Protein Accessions	# Missed Cleavages	Theo. MH+ [Da]	# Razor Quan Results	Abundance Ratio: (F4, Sample) / (F3, Control)	Abundance Ratio Adj. P-Value: (F4, Sample) / (F3, Control)	Abundance Ratio Variability [%]: (F4, Sample) / (F3, Control)	Abundances (Grouped): F3, Control	Abundances (Grouped): F4, Sample	Abundance: F3: Control	Abundance: F4: Sample	Quan Info	Found in Sample: [S3] F3: Control	Found in Sample: [S4] F4: Sample	Confidence (by Search Engine): Sequest HT	Percolator q-Value (by Search Engine): Sequest HT	Percolator PEP (by Search Engine): Sequest HT	XCorr (by Search Engine): Sequest HT	Top Apex RT [min]	Quan Usage
	TRUE	High	HTQVSVLPEGGETPLFK		FALSE	0.00024194	0	1	1	7	XP_022280742.1	0	1838.96	0	0.944	0.987506	0	102.9	97.1	6.44289e+06	6.0797e+06		High	High	High	0	7.735e-05	3.38	48.6	Used
	TRUE	High	RAALSTASDFITR		FALSE	0.000165027	0	1	1	4	XP_022280742.1	1	1408.75	0	0.982	0.993774	0	100.9	99.1	8.87037e+06	8.70773e+06		High	High	High	0	2.06e-05	3.34	33.14	Used
	TRUE	High	AQPVQVAEGSEPDGFWEALGGK	1xDeamidated [Q]	FALSE	3.71883e-05	0	1	1	4	XP_022280742.1	0	2273.07	0								No Quan Values	High	High	High	0	5.749e-06	4.14		Not Used
	TRUE	High	AQPVQVAEGSEPDGFWEALGGK		FALSE	3.20972e-07	0	1	1	8	XP_022280742.1	0	2272.09	0	0.901	0.97481	0	105.2	94.8	4.67719e+06	4.21402e+06		High	High	High	0	9.473e-08	5.35	73.41	Used
	TRUE	High	AALSTASDFITR		FALSE	0.000371752	0	1	1	7	XP_022280742.1	0	1252.65	0	1.322	0.930056	0	86.1	113.9	3.09021e+07	4.08424e+07		High	High	High	0	4.122e-05	2.68	37.81	Used
	TRUE	High	AGKEPGLQVWR		FALSE	0.00200245	0.000331607	1	1	2	XP_022280742.1	1	1240.68	0	0.705	0.906048	0	117.3	82.7	2.10704e+06	1.48449e+06		High	High	High	0.001074	0.01251	2.77	29.58	Used
	TRUE	High	SEDCFILDHGR	1xCarbamidomethyl [C4]	FALSE	0.00209866	0.000331607	1	1	3	XP_022280742.1	0	1348.6	0	0.572	0.831903	0	127.2	72.8	4.36813e+06	2.49933e+06		High	High	High	0.0001485	0.0002165	2.27	29.38	Used
	TRUE	High	AQVHVSEEGAEPEAMLQVLGPKPALPAGAEDTAKEDAANR	1xDeamidated [Q/N]; 1xOxidation [M15]	FALSE	0.00833821	0.000480221	1	1	2	XP_022280742.1	1	4114	0								No Quan Values	High	Not Found	High	0.003052	0.04011	3.77		Not Used
	TRUE	High	HTQVSVLPEGGETPLFK	1xDeamidated [Q3]	FALSE	0.0124476	0.000480221	1	1	2	XP_022280742.1	0	1839.95	0								Not Reliable	High	High	High	0.0001485	0.000655	2.45		Not Used
	TRUE	High	ECSQDESGAAAIFTVQLDDYLNGR	1xCarbamidomethyl [C2]; 1xDeamidated [Q16]	FALSE	0.00468971	0.000480221	1	1	1	XP_022280742.1	0	2660.18	0								No Quan Values	High	Not Found	High	0.0001485	0.0002867	3.04		Not Used
	TRUE	High	SEDCFILDHGRDGK	1xCarbamidomethyl [C4]	FALSE	0.0593607	0.00139497	1	1	1	XP_022280742.1	1	1648.74	0	0.491	0.747288	0	134.2	65.8	737606	362013		High	Peak Found	High	0.0004148	0.006803	1.84	25.07	Used
	TRUE	High	DSQEEEKTEALSSAK		FALSE	0.0605204	0.00139497	1	1	2	XP_022280742.1	1	1651.77	0	0.659	0.877459	0	120.6	79.4	50374.4	33187.1		High	Peak Found	High	0.0004148	0.00709	2.33	13.93	Used
	TRUE	High	NWRDPDQTDGPGLGYLSSHIAHVER	1xDeamidated [N/Q]	FALSE	0.0843749	0.00326873	1	1	3	XP_022280742.1	1	2821.33	0								Not Reliable	High	High	High	0.002471	0.03	2.88		Not Used
TRUE	High	Master Protein	XP_005619707.1	heat shock cognate 71 kDa protein [Canis lupus familiaris]	0	FALSE	189.278	49	24	118	22	1	646	70.9	5.52	247.03	24	1	0.706	0.83978	15.47	114	86	1.21808e+08	9.19506e+07	High	High
	Checked	Confidence	Sequence	Modifications	Contaminant	Qvality PEP	Qvality q-value	# Protein Groups	# Proteins	# PSMs	Master Protein Accessions	# Missed Cleavages	Theo. MH+ [Da]	# Razor Quan Results	Abundance Ratio: (F4, Sample) / (F3, Control)	Abundance Ratio Adj. P-Value: (F4, Sample) / (F3, Control)	Abundance Ratio Variability [%]: (F4, Sample) / (F3, Control)	Abundances (Grouped): F3, Control	Abundances (Grouped): F4, Sample	Abundance: F3: Control	Abundance: F4: Sample	Quan Info	Found in Sample: [S3] F3: Control	Found in Sample: [S4] F4: Sample	Confidence (by Search Engine): Sequest HT	Percolator q-Value (by Search Engine): Sequest HT	Percolator PEP (by Search Engine): Sequest HT	XCorr (by Search Engine): Sequest HT	Top Apex RT [min]	Quan Usage
	TRUE	High	LDKSQIHDIVLVGGSTR		FALSE	4.19641e-05	0	1	1	5	XP_005619707.1	1	1838.01	0	0.847	0.971875	0	108.3	91.7	6.63534e+06	5.62157e+06		High	High	High	0	6.357e-06	2.83	39.73	Used
	TRUE	High	IINEPTAAAIAYGLDK		FALSE	9.39289e-06	0	2	5	4	XP_005619707.1; XP_863385.2	0	1659.9	0	0.758	0.930356	0	113.7	86.3	4365499	3.31096e+06	Shared	High	High	High	0	1.749e-06	3.42	58.71	Not Used
	TRUE	High	IINEPTAAAIAYGLDKK		FALSE	4.58011e-06	0	1	2	2	XP_005619707.1	1	1787.99	0	0.712	0.907898	0	116.8	83.2	7.14754e+06	5088870		High	High	High	0	9.416e-07	2.58	52.71	Used
	TRUE	High	QTQTFTTYSDNQPGVLIQVYEGER		FALSE	4.57905e-05	0	1	1	6	XP_005619707.1	0	2774.33	0	0.577	0.835722	0	126.8	73.2	3.41703e+06	1.9714e+06		High	High	High	0	6.877e-06	4.78	70.36	Used
	TRUE	High	QTQTFTTYSDNQPGVLIQVYEGER	1xDeamidated [Q/N]	FALSE	4.96314e-05	0	1	1	12	XP_005619707.1	0	2775.31	0								Not Reliable	High	High	High	0	2.918e-05	4.25		Not Used
	TRUE	High	SINPDEAVAYGAAVQAAILSGDK		FALSE	7.22949e-06	0	1	1	2	XP_005619707.1	0	2260.15	0								No Quan Values	High	High	High	0	2.116e-05	2.95		Not Used
	TRUE	High	SQIHDIVLVGGSTR		FALSE	3.10239e-05	0	1	1	4	XP_005619707.1	0	1481.81	0	0.899	0.9743	0	105.3	94.7	1.17582e+07	1.05714e+07		High	High	High	0	4.906e-06	3.14	32.66	Used
	TRUE	High	SFYPEEVSSMVLTK	1xOxidation [M10]	FALSE	3.5244e-05	0	1	1	3	XP_005619707.1	0	1632.78	0	0.856	0.971875	0	107.7	92.3	4.24037e+06	3.63069e+06		High	High	High	0	5.472e-06	2.89	49.68	Used
	TRUE	High	TTPSYVAFTDTER		FALSE	0.000567374	0	2	5	6	NP_001003067.2; XP_005619707.1	0	1487.7	0	1.183	0.971875	0	91.6	108.4	13231171	15648277	Shared	High	High	High	0	6.027e-05	3.63	35.6	Used
	TRUE	High	MKEIAEAYLGK	1xOxidation [M1]	FALSE	8.32187e-05	0	1	1	4	XP_005619707.1	1	1268.66	0	0.348	0.487145	0	148.4	51.6	1.97059e+06	685269		High	High	High	0	1.92e-05	3	23.97	Used
	TRUE	High	MKEIAEAYLGK		FALSE	0.000181287	0	1	1	3	XP_005619707.1	1	1252.66	0	0.429	0.660414	0	139.9	60.1	3.50413e+06	1.50484e+06		High	High	High	0	2.238e-05	3.05	29.7	Used
	TRUE	High	TVTNAVVTVPAYFNDSQR		FALSE	2.14469e-05	0	1	1	8	XP_005619707.1	0	1982	0	0.566	0.827074	0	127.7	72.3	9.67748e+06	5.47581e+06		High	High	High	0	3.063e-05	3.28	53.51	Used
	TRUE	High	TVTNAVVTVPAYFNDSQR	1xDeamidated [Q/N]	FALSE	0.00112482	0	1	1	5	XP_005619707.1	0	1982.98	0								Not Reliable	High	High	High	0	0.0001025	3.85		Not Used
	TRUE	High	NQVAMNPTNTVFDAK	1xOxidation [M5]	FALSE	0.000666518	0	1	1	5	XP_005619707.1	0	1665.79	0	0.579	0.837336	0	126.7	73.3	9370783	5.42141e+06		High	High	High	0	0.0001309	3.19	28.16	Used
	TRUE	High	NSLESYAFNMK	1xOxidation [M10]	FALSE	0.000925964	0	1	1	2	XP_005619707.1	0	1319.59	0	0.949	0.987784	0	102.6	97.4	6.33643e+06	6015529		High	High	High	0.0001092	0.0001762	2.92	34.1	Used
	TRUE	High	ARFEELNADLFR		FALSE	0.000552347	0	1	2	4	XP_005619707.1	1	1480.75	0	0.852	0.971875	0	108	92	8298074	7.06923e+06		High	High	High	0	5.737e-05	2.57	52.53	Used
	TRUE	High	DAGTIAGLNVLR		FALSE	5.86995e-05	0	1	1	5	XP_005619707.1	0	1199.67	0	0.701	0.902642	0	117.6	82.4	8405452	5889995		High	High	High	0	1.778e-05	2.94	49.95	Used
	TRUE	High	GPAVGIDLGTTYSCVGVFQHGK	1xCarbamidomethyl [C14]; 1xDeamidated [Q19]	FALSE	0.000101783	0	1	1	2	XP_005619707.1	0	2264.1	0								No Quan Values	High	High	High	0	1.363e-05	4.34		Not Used
	TRUE	High	GPAVGIDLGTTYSCVGVFQHGK	1xCarbamidomethyl [C14]	FALSE	1.4241e-05	0	1	1	3	XP_005619707.1	0	2263.12	0	0.678	0.89828	0	119.2	80.8	1.41335e+06	957672		High	High	High	0	2.506e-06	3.76	61.8	Used
	TRUE	High	NQVAMNPTNTVFDAKR	1xOxidation [M5]	FALSE	0.00189787	0.000331607	1	1	3	XP_005619707.1	1	1821.89	0	0.495	0.750907	0	133.8	66.2	1.52266e+07	7.53765e+06		High	High	High	0.0001092	0.0001526	2.68	25.18	Used
	TRUE	High	MVNHFIAEFK		FALSE	0.00642376	0.000480221	1	1	2	XP_005619707.1	0	1235.62	0								No Quan Values	High	High	High	0.0002019	0.001377	2.27		Not Used
	TRUE	High	MVNHFIAEFK	1xOxidation [M1]	FALSE	0.00764406	0.000480221	1	1	2	XP_005619707.1	0	1251.62	0	1.01	0.997234	0	99.5	100.5	3316818	3.34955e+06		High	High	High	0.0001485	0.0004141	2.7	35.18	Used
	TRUE	High	MVNHFIAEFKR	1xOxidation [M1]	FALSE	0.0060889	0.000480221	1	1	3	XP_005619707.1	1	1407.72	0	0.835	0.971492	0	109	91	3.31375e+06	2.76621e+06		High	High	High	0.0002019	0.001023	2.73	31.34	Used
	TRUE	High	NQVAMNPTNTVFDAK		FALSE	0.00659801	0.000480221	1	1	2	XP_005619707.1	0	1649.8	0								No Quan Values	High	High	High	0.002248	0.02582	2.15		Not Used
	TRUE	High	NQVAMNPTNTVFDAK	1xDeamidated [N]; 1xOxidation [M5]	FALSE	0.0159288	0.000480221	1	1	2	XP_005619707.1	0	1666.77	0								No Quan Values	High	Not Found	High	0.0001485	0.0008635	3.5		Not Used
	TRUE	High	STAGDTHLGGEDFDNR		FALSE	0.00340026	0.000480221	1	2	3	XP_005619707.1	0	1691.73	0	0.211	0.161139	0	165.1	34.9	2.24847e+06	475233		High	High	High	0.0001485	0.0002302	3.26	18.97	Used
	TRUE	High	LYQSAGGMPGGMPGGFPGGGAPPSGGASSGPTIEEVD	1xDeamidated [Q3]; 2xOxidation [M8; M12]	FALSE	0.0118797	0.000480221	1	1	2	XP_005619707.1	0	3379.47	0								No Quan Values	High	Not Found	High	0.003826	0.04902	3.43		Not Used
	TRUE	High	LLQDFFNGKELNK		FALSE	0.00378499	0.000480221	1	2	1	XP_005619707.1	1	1565.83	0	0.979	0.993516	0	101.1	98.9	1.47102e+06	1.43943e+06		Peak Found	High	High	0.0001485	0.0002473	2.13	51.59	Used
	TRUE	High	LLQDFFNGKELNK	1xDeamidated [N]	FALSE	0.00839413	0.000480221	1	2	3	XP_005619707.1	1	1566.82	0								No Quan Values	High	Not Found	High	0.0001485	0.0004488	2.03		Not Used
	TRUE	High	IINEPTAAAIAYGLDKK	1xDeamidated [N3]	FALSE	0.00785128	0.000480221	1	2	1	XP_005619707.1	1	1788.97	0								Not Reliable	Not Found	High	High	0.0001485	0.0004249	2.17		Not Used
	TRUE	High	HWPFMVVNDAGRPK	1xOxidation [M5]	FALSE	0.0226537	0.000666919	1	1	2	XP_005619707.1	0	1669.83	0	100	9.75497e-17			200		335176		High	High	High	0.0002019	0.001368	2.91	38.9	Used
	TRUE	High	NQVAMNPTNTVFDAKR	1xDeamidated [N/Q]; 1xOxidation [M5]	FALSE	0.0657998	0.00177815	1	1	2	XP_005619707.1	1	1822.88	0								No Quan Values	High	Not Found	High	0.0006407	0.008566	1.67		Not Used
	TRUE	High	SFYPEEVSSMVLTK		FALSE	0.128847	0.00640612	1	1	1	XP_005619707.1	0	1616.79	0								No Quan Values	High	Not Found	High	0.002348	0.02727	2.84		Not Used
	TRUE	High	NQVAMNPTNTVFDAKR		FALSE	0.147261	0.00703674	1	1	1	XP_005619707.1	1	1805.9	0								No Quan Values	Not Found	High	High	0.002521	0.03418	0.89		Not Used
	TRUE	High	NQTAEKEEFEHQQKELEK		FALSE	0.156382	0.00751146	1	1	1	XP_005619707.1	2	2245.07	0								No Quan Values	High	Not Found	High	0.00271	0.0377	2.05		Not Used
	TRUE	High	LLQDFFNGK		FALSE	0.170999	0.00936775	1	2	2	XP_005619707.1	0	1081.57	0	0.601	0.852006	0	125	75	825002	495419		High	High	High	0.003396	0.0437	1.97	49.38	Used
TRUE	High	Master Protein	NP_001257813.1	hemoglobin subunit beta-like [Canis lupus familiaris]	0	FALSE	184.824	90	15	201	14	1	147	16.1	8.05	432.14	15	1	0.882	0.931457	65.31	120	80	1.36445e+09	9.10078e+08	High	High
	Checked	Confidence	Sequence	Modifications	Contaminant	Qvality PEP	Qvality q-value	# Protein Groups	# Proteins	# PSMs	Master Protein Accessions	# Missed Cleavages	Theo. MH+ [Da]	# Razor Quan Results	Abundance Ratio: (F4, Sample) / (F3, Control)	Abundance Ratio Adj. P-Value: (F4, Sample) / (F3, Control)	Abundance Ratio Variability [%]: (F4, Sample) / (F3, Control)	Abundances (Grouped): F3, Control	Abundances (Grouped): F4, Sample	Abundance: F3: Control	Abundance: F4: Sample	Quan Info	Found in Sample: [S3] F3: Control	Found in Sample: [S4] F4: Sample	Confidence (by Search Engine): Sequest HT	Percolator q-Value (by Search Engine): Sequest HT	Percolator PEP (by Search Engine): Sequest HT	XCorr (by Search Engine): Sequest HT	Top Apex RT [min]	Quan Usage
	TRUE	High	LSELHCDKLHVDPENFK	1xCarbamidomethyl [C6]	FALSE	7.03628e-05	0	1	2	18	NP_001257813.1	1	2081.01	0	0.882	0.9743	0	106.3	93.7	6.49336e+07	5.72934e+07		High	High	High	0	9.941e-06	4.63	34.22	Used
	TRUE	High	LLIVYPWTQR		FALSE	0.000798898	0	1	2	12	NP_001257813.1	0	1288.74	0	0.777	0.939738	0	112.5	87.5	8.19308e+07	63686989		High	High	High	0.0001092	0.0001806	2.45	70.72	Used
	TRUE	High	LLGNVLVCVLAHHFGK	1xCarbamidomethyl [C8]	FALSE	0.000104552	0	1	1	11	NP_001257813.1	0	1776.99	0	0.181	0.101594	0	169.4	30.6	3.03342e+07	5.4799e+06		High	High	High	0	2.021e-05	2.86	94.03	Used
	TRUE	High	LLGNVLVCVLAHHFGKEFTPQVQAAYQK	1xCarbamidomethyl [C8]	FALSE	0.000951149	0	1	1	2	NP_001257813.1	1	3167.68	0	0.01	9.75497e-17		200		3.10253e+06			High	Not Found	High	0.001685	0.02158	2.74	99.83	Used
	TRUE	High	VLNSFSDGLKNLDNLK		FALSE	7.73142e-06	0	1	2	4	NP_001257813.1	1	1776.95	0	0.258	0.267191	0	159	41	1.60455e+07	4.13441e+06		High	High	High	0	1.48e-06	3.19	57.87	Used
	TRUE	High	VLNSFSDGLK		FALSE	0.000648867	0	1	2	4	NP_001257813.1	0	1079.57	0	1.534	0.885998	0	78.9	121.1	8.0643e+07	1.23672e+08		High	High	High	0	6.567e-05	3.21	30.08	Used
	TRUE	High	KVLNSFSDGLK		FALSE	2.92052e-05	0	1	2	8	NP_001257813.1	1	1207.67	0	2.966	0.463175	0	50.4	149.6	1.44791e+07	4.29387e+07		High	High	High	0.0004148	0.005866	2.02	25.78	Used
	TRUE	High	KVLNSFSDGLK	1xDeamidated [N4]	FALSE	0.00157299	0	1	2	5	NP_001257813.1	1	1208.65	0	1.555	0.879628	0	78.3	121.7	3.03932e+06	4.72588e+06		High	High	High	0.001527	0.01942	2.85	27.84	Used
	TRUE	High	SLVSGLWGK		FALSE	0.00172782	0	1	1	4	NP_001257813.1	0	946.536	0	0.755	0.929628	0	113.9	86.1	12706754	9596016		High	High	High	0	0.0001428	2.07	49.08	Used
	TRUE	High	FFDSFGDLSTPDAVMSNAK	1xOxidation [M15]	FALSE	3.0837e-08	0	1	2	21	NP_001257813.1	0	2064.92	0	0.684	0.89828	0	118.8	81.2	4.19976e+07	2.87268e+07		High	High	High	0	1.259e-08	5.54	61.38	Used
	TRUE	High	FFDSFGDLSTPDAVMSNAK	1xDeamidated [N17]	FALSE	5.83206e-06	0	1	2	1	NP_001257813.1	0	2049.91	0								Not Reliable	Not Found	High	High	0	1.161e-06	1.91		Not Used
	TRUE	High	FFDSFGDLSTPDAVMSNAK		FALSE	1.44366e-06	0	1	2	4	NP_001257813.1	0	2048.93	0	0.862	0.971875	0	107.4	92.6	4494482	3.8764e+06		High	High	High	0	3.475e-07	4.99	71.91	Used
	TRUE	High	FFDSFGDLSTPDAVMSNAK	1xDeamidated [N17]; 1xOxidation [M15]	FALSE	6.7164e-07	0	1	2	11	NP_001257813.1	0	2065.91	0								No Quan Values	High	High	High	0	8.607e-07	5.03		Not Used
	TRUE	High	VVAGVANALAHK		FALSE	0.000349962	0	1	1	7	NP_001257813.1	0	1149.67	0	3.334	0.375949	0	46.1	153.9	4.47253e+06	1.49135e+07		High	High	High	0	3.904e-05	2.38	23.48	Used
	TRUE	High	EFTPQVQAAYQK		FALSE	0.00153136	0	1	1	10	NP_001257813.1	0	1409.71	0	0.953	0.988634	0	102.4	97.6	1.04911e+08	9.99995e+07		High	High	High	0.0001092	0.0001902	2.97	27.63	Used
	TRUE	High	VVAGVANALAHK	1xDeamidated [N7]	FALSE	0.000717575	0	1	1	2	NP_001257813.1	0	1150.66	0	3.963	0.360923	0	40.3	159.7	86161.3	341463		Peak Found	High	High	0	7.138e-05	2.12	26.25	Used
	TRUE	High	VVAGVANALAHKYH		FALSE	1.83787e-05	0	1	1	11	NP_001257813.1	1	1449.8	0	0.847	0.971875	0	108.3	91.7	1.94466e+08	1.64738e+08		High	High	High	0	3.132e-06	3.26	29.53	Used
	TRUE	High	VVAGVANALAHKYH	1xDeamidated [N7]	FALSE	0.000192575	0	1	1	3	NP_001257813.1	1	1450.78	0	0.725	0.915201	0	115.9	84.1	1.5877e+06	1.15121e+06		High	High	High	0	2.358e-05	2.7	32.58	Used
	TRUE	High	VNVDEVGGEALGR		FALSE	1.18035e-06	0	1	2	31	NP_001257813.1	0	1314.66	0	0.383	0.568304	0	144.6	55.4	6.89905e+08	2.64307e+08		High	High	High	0	4.654e-06	4.4	30.2	Used
	TRUE	High	EFTPQVQAAYQK	1xDeamidated [Q]	FALSE	0.00188519	0.000331607	1	1	10	NP_001257813.1	0	1410.69	0	1.298	0.936187	0	87	113	5.67871e+06	7.37231e+06		High	High	High	0.0001485	0.0003115	3.25	29.27	Used
	TRUE	High	LSELHCDKLHVDPENFK	1xCarbamidomethyl [C6]; 1xDeamidated [N15]	FALSE	0.00204313	0.000331607	1	2	5	NP_001257813.1	1	2082	0								No Quan Values	High	High	High	0.0001092	0.000161	3.93		Not Used
	TRUE	High	NLDNLKGTFAK	1xDeamidated [N4]	FALSE	0.00315866	0.000480221	1	2	2	NP_001257813.1	1	1221.65	0	2.059	0.737591	0	65.4	134.6	546162	1.12468e+06		High	High	High	0.0001485	0.0002191	1.99	31.03	Used
	TRUE	High	VLNSFSDGLK	1xDeamidated [N3]	FALSE	0.00801036	0.000480221	1	2	5	NP_001257813.1	0	1080.56	0	0.876	0.9743	0	106.6	93.4	6.86235e+06	6.00952e+06		High	High	High	0.00484	0.06354	2.71	31.26	Used
	TRUE	High	LLGNVLVCVLAHHFGKEFTPQVQAAYQK	1xCarbamidomethyl [C8]; 1xDeamidated [Q]	FALSE	0.00940406	0.000480221	1	1	4	NP_001257813.1	1	3168.67	0								Not Reliable	High	Not Found	High	0.0002019	0.001708	2.84		Not Used
	TRUE	High	VLNSFSDGLKNLDNLK	2xDeamidated [N11; N14]	FALSE	0.0319413	0.000865703	1	2	1	NP_001257813.1	1	1778.92	0								No Quan Values	High	Not Found	High	0.0002602	0.002295	2.47		Not Used
	TRUE	High	VLNSFSDGLKNLDNLK	1xDeamidated [N]	FALSE	0.0957046	0.00414812	1	2	2	NP_001257813.1	1	1777.93	0								No Quan Values	High	Not Found	High	0.001436	0.01633	2.06		Not Used
	TRUE	High	NLDNLKGTFAK		FALSE	0.118968	0.00590393	1	2	1	NP_001257813.1	1	1220.66	0	2.026	0.748201	0	66.1	133.9	1.74851e+06	3.5432e+06		Peak Found	High	High	0.002102	0.02388	1.36	27.61	Used
TRUE	High	Master Protein	NP_001003363.1	pleckstrin [Canis lupus familiaris]	0	FALSE	184.414	47	15	128	15	1	351	40.2	8.28	346.22	15	0	1.052	0.955956	91.7	91.5	108.5	9.29107e+07	1.10095e+08	High	High
	Checked	Confidence	Sequence	Modifications	Contaminant	Qvality PEP	Qvality q-value	# Protein Groups	# Proteins	# PSMs	Master Protein Accessions	# Missed Cleavages	Theo. MH+ [Da]	# Razor Quan Results	Abundance Ratio: (F4, Sample) / (F3, Control)	Abundance Ratio Adj. P-Value: (F4, Sample) / (F3, Control)	Abundance Ratio Variability [%]: (F4, Sample) / (F3, Control)	Abundances (Grouped): F3, Control	Abundances (Grouped): F4, Sample	Abundance: F3: Control	Abundance: F4: Sample	Quan Info	Found in Sample: [S3] F3: Control	Found in Sample: [S4] F4: Sample	Confidence (by Search Engine): Sequest HT	Percolator q-Value (by Search Engine): Sequest HT	Percolator PEP (by Search Engine): Sequest HT	XCorr (by Search Engine): Sequest HT	Top Apex RT [min]	Quan Usage
	TRUE	High	IFNHCFTGNCVIDWLVSNK	2xCarbamidomethyl [C5; C10]	FALSE	1.97871e-05	0	1	1	5	NP_001003363.1	0	2324.1	0	1.052	0.987785	0	97.4	102.6	1.06273e+06	1118478		High	High	High	0	3.336e-06	4	91.89	Used
	TRUE	High	IFNHCFTGNCVIDWLVSNK	2xCarbamidomethyl [C5; C10]; 1xDeamidated [N]	FALSE	3.8209e-06	0	1	1	4	NP_001003363.1	0	2325.08	0								Not Reliable	High	High	High	0	8.055e-07	3.28		Not Used
	TRUE	High	LPETVDLGALYLSMK	1xOxidation [M14]	FALSE	5.13254e-05	0	1	1	3	NP_001003363.1	0	1665.88	0	2.233	0.686214	0	61.9	138.1	853346	1905452		High	High	High	0	7.55e-06	3.21	72.43	Used
	TRUE	High	LPETVDLGALYLSMKDIEK	1xOxidation [M14]	FALSE	2.08787e-05	0	1	1	4	NP_001003363.1	1	2151.13	0	0.774	0.937776	0	112.7	87.3	4.77114e+06	3.69239e+06		High	High	High	0	0.0001472	2.94	72.49	Used
	TRUE	High	KSEEENLFEIITADEVHYFLQAATPK		FALSE	2.7709e-10	0	1	1	9	NP_001003363.1	1	3022.5	0	0.401	0.611912	0	142.7	57.3	1.97163e+07	7915758		High	High	High	0	2.15e-10	7.24	126.95	Used
	TRUE	High	KSEEENLFEIITADEVHYFLQAATPK	1xDeamidated [Q/N]	FALSE	2.82602e-08	0	1	1	13	NP_001003363.1	1	3023.49	0	3.275	0.489824	0	46.8	153.2	102930	337135		High	High	High	0	2.102e-08	5.83	126.66	Used
	TRUE	High	QEGLMIASSLLGEGYLQPAGELSK	1xOxidation [M5]	FALSE	0.000229291	0	1	1	4	NP_001003363.1	0	2507.27	0								No Quan Values	High	High	High	0	2.726e-05	3.69		Not Used
	TRUE	High	QEGLMIASSLLGEGYLQPAGELSK	1xDeamidated [Q]; 1xOxidation [M5]	FALSE	0.000762243	0	1	1	4	NP_001003363.1	0	2508.25	0								Not Reliable	High	Not Found	High	0.0001485	0.0002494	4		Not Used
	TRUE	High	SEEENLFEIITADEVHYFLQAATPK		FALSE	0.000200489	0	1	1	4	NP_001003363.1	0	2894.41	0	0.566	0.82768	0	127.7	72.3	4808776	2.72408e+06		High	High	High	0	2.439e-05	3.09	133.06	Used
	TRUE	High	SIRLPETVDLGALYLSMKDIEK	1xOxidation [M17]	FALSE	0.00129497	0	1	1	3	NP_001003363.1	2	2507.34	0	0.624	0.87102	0	123.2	76.8	2.4769e+06	1.54458e+06		High	High	High	0	0.0001144	3.55	78.61	Used
	TRUE	High	SEEENLFEIITADEVHYFLQAATPK	1xDeamidated [Q20]	FALSE	1.12592e-05	0	1	1	4	NP_001003363.1	0	2895.39	0								No Quan Values	High	High	High	0	2.051e-06	4.09		Not Used
	TRUE	High	NRQEGLMIASSLLGEGYLQPAGELSK		FALSE	7.9953e-06	0	1	1	2	NP_001003363.1	1	2761.42	0	0.395	0.595149	0	143.4	56.6	2.11e+06	832405		High	High	High	0	1.522e-06	2.84	84.46	Used
	TRUE	High	NRQEGLMIASSLLGEGYLQPAGELSK	1xDeamidated [Q/N]	FALSE	7.57546e-05	0	1	1	5	NP_001003363.1	1	2762.4	0								Not Reliable	High	High	High	0	1.06e-05	4.31		Not Used
	TRUE	High	NRQEGLMIASSLLGEGYLQPAGELSK	1xOxidation [M7]	FALSE	1.16461e-06	0	1	1	10	NP_001003363.1	1	2777.41	0	0.913	0.977963	0	104.6	95.4	1.38516e+07	1.2643e+07		High	High	High	0	5.546e-07	4.24	77.81	Used
	TRUE	High	NRQEGLMIASSLLGEGYLQPAGELSK	1xDeamidated [Q/N]; 1xOxidation [M7]	FALSE	4.67219e-05	0	1	1	17	NP_001003363.1	1	2778.4	0								Not Reliable	High	High	High	0	1.103e-05	4.03		Not Used
	TRUE	High	FILREDPAYLHYYDPAAGGEEPLGAIHLR		FALSE	0.000253578	0	1	1	2	NP_001003363.1	1	3283.65	0								No Quan Values	High	High	High	0	2.986e-05	3.1		Not Used
	TRUE	High	EDPAYLHYYDPAAGGEEPLGAIHLR		FALSE	6.03245e-07	0	1	1	6	NP_001003363.1	0	2754.32	0	0.79	0.945696	0	111.8	88.2	2.21605e+07	17498215		High	High	High	0	1.636e-07	4.77	67.12	Used
	TRUE	High	GCVVTSVESNPDVRK	1xCarbamidomethyl [C2]	FALSE	0.000180074	0	1	1	2	NP_001003363.1	1	1646.82	0	4.072	0.335856	0	39.4	160.6	91463.1	372445		High	High	High	0	2.228e-05	2.44	18.76	Used
	TRUE	High	GCVVTSVESNPDVR	1xCarbamidomethyl [C2]; 1xDeamidated [N10]	FALSE	1.47303e-06	0	1	1	1	NP_001003363.1	0	1519.71	0								Not Reliable	Not Found	High	High	0	3.548e-07	3.9		Not Used
	TRUE	High	GCVVTSVESNPDVR	1xCarbamidomethyl [C2]	FALSE	9.65063e-07	0	1	1	16	NP_001003363.1	0	1518.72	0	2.801	0.509044	0	52.6	147.4	1.80474e+07	5.05553e+07		High	High	High	0	4.381e-07	4.76	22.94	Used
	TRUE	High	GSTLTSPCQDFGKR	1xCarbamidomethyl [C8]	FALSE	0.0137571	0.000480221	1	1	3	NP_001003363.1	1	1553.74	0	4.577	0.175033	0	35.9	164.1	681896	3.12107e+06		High	High	High	0.001025	0.01154	2	22	Used
	TRUE	High	LPETVDLGALYLSMKDIEK		FALSE	0.00342312	0.000480221	1	1	1	NP_001003363.1	1	2135.13	0								No Quan Values	High	Not Found	High	0.0001485	0.0002309	2.83		Not Used
	TRUE	High	GSTLTSPCQDFGK	1xCarbamidomethyl [C8]	FALSE	0.0263794	0.000666919	1	1	2	NP_001003363.1	0	1397.64	0	5.153	0.126462	0	32.5	167.5	784015	4.04016e+06		High	High	High	0.0002019	0.001702	2.57	24.86	Used
	TRUE	High	QQDHFFQAAFLEER		FALSE	0.0715144	0.00234546	1	1	3	NP_001003363.1	0	1765.83	0	1.289	0.938362	0	87.4	112.6	1.39181e+06	1.79416e+06		High	High	High	0.003245	0.04291	2.17	57.45	Used
	TRUE	High	QEGLMIASSLLGEGYLQPAGELSK	1xDeamidated [Q17]	FALSE	0.13946	0.0068648	1	1	1	NP_001003363.1	0	2492.26	0								No Quan Values	High	Not Found	High	0.002471	0.03127	2.91		Not Used
TRUE	High	Master Protein	NP_001239140.1	tropomyosin alpha-3 chain [Canis lupus familiaris]	0	FALSE	174.179	60	22	160	12	1	248	28.9	4.75	291.49	22	0	0.943	0.955956	41.64	104.4	95.6	5.0273e+07	4.60436e+07	High	High
	Checked	Confidence	Sequence	Modifications	Contaminant	Qvality PEP	Qvality q-value	# Protein Groups	# Proteins	# PSMs	Master Protein Accessions	# Missed Cleavages	Theo. MH+ [Da]	# Razor Quan Results	Abundance Ratio: (F4, Sample) / (F3, Control)	Abundance Ratio Adj. P-Value: (F4, Sample) / (F3, Control)	Abundance Ratio Variability [%]: (F4, Sample) / (F3, Control)	Abundances (Grouped): F3, Control	Abundances (Grouped): F4, Sample	Abundance: F3: Control	Abundance: F4: Sample	Quan Info	Found in Sample: [S3] F3: Control	Found in Sample: [S4] F4: Sample	Confidence (by Search Engine): Sequest HT	Percolator q-Value (by Search Engine): Sequest HT	Percolator PEP (by Search Engine): Sequest HT	XCorr (by Search Engine): Sequest HT	Top Apex RT [min]	Quan Usage
	TRUE	High	IQVLQQQADDAEER		FALSE	3.22989e-05	0	1	4	2	NP_001239140.1	0	1642.8	0	3.994	0.348904	0	40.1	159.9	92751	370416		High	High	High	0	5.065e-06	2.97	22.71	Used
	TRUE	High	HIAEEADRKYEEVAR		FALSE	6.44985e-06	0	2	13	49	NP_001239140.1; XP_003432953.1	2	1815.9	0	0.741	0.922256	0	114.9	85.1	7.33669e+07	5.43634e+07	Shared	High	High	High	0.0001485	0.0001991	3.48	15.77	Not Used
	TRUE	High	KIQVLQQQADDAEER		FALSE	8.72626e-07	0	1	4	4	NP_001239140.1	1	1770.9	0	2.265	0.680215	0	61.3	138.7	504697	1.14306e+06		High	High	High	0	2.348e-06	4.27	19.83	Used
	TRUE	High	KIQVLQQQADDAEERAER		FALSE	7.27643e-05	0	1	4	11	NP_001239140.1	2	2127.08	0	0.758	0.930356	0	113.8	86.2	1.98427e+07	1.50405e+07		High	High	High	0	2.758e-05	3.75	25.71	Used
	TRUE	High	KLVIIEGDLER		FALSE	3.76909e-05	0	1	9	4	NP_001239140.1	1	1284.75	0	1.335	0.926594	0	85.7	114.3	6983909	9.32201e+06		High	High	High	0	5.8e-06	3.59	35.34	Used
	TRUE	High	MLDQTLLDLNEM	2xOxidation [M1; M12]	FALSE	0.000996881	0	1	5	2	NP_001239140.1	0	1467.67	0								No Quan Values	High	High	High	0	9.289e-05	3.47		Not Used
	TRUE	High	AREQAEAEVASLNR		FALSE	0.00023239	0	1	4	4	NP_001239140.1	1	1543.78	0	1.124	0.98709	0	94.2	105.8	200174	224945		High	High	High	0	2.772e-05	3.18	19.18	Used
	TRUE	High	AREQAEAEVASLNRR		FALSE	0.000238714	0	1	4	4	NP_001239140.1	2	1699.88	0	0.943	0.987506	0	102.9	97.1	1.20134e+06	1.13323e+06		High	High	High	0	2.824e-05	3.2	18.45	Used
	TRUE	High	YSQKEDKYEEEIK	1xDeamidated [Q3]	FALSE	0.000195178	0	3	30	4	XP_864981.1; NP_001239140.1; XP_865093.1	2	1689.79	0								No Quan Values	High	High	High	0.0001485	0.0004093	2.71	15.52	Not Used
	TRUE	High	ALKDEEKMELQEIQLK	1xOxidation [M8]	FALSE	0.000320722	0	1	9	4	NP_001239140.1	2	1961.03	0	0.646	0.880668	0	121.5	78.5	4.93674e+06	3186870		High	High	High	0	3.643e-05	3.18	37.18	Used
	TRUE	High	TIDDLEDKLK		FALSE	0.00596786	0.000480221	1	5	5	NP_001239140.1	1	1189.63	0	1.413	0.907887	0	82.9	117.1	5.10034e+06	7.20541e+06		High	High	High	0.0001485	0.00054	2.07	30.14	Used
	TRUE	High	KIQVLQQQADDAEERAER	1xDeamidated [Q]	FALSE	0.00891456	0.000480221	1	4	20	NP_001239140.1	2	2128.06	0	0.529	0.790564	0	130.8	69.2	2.42791e+06	1.28412e+06		High	High	High	0.002664	0.03523	4.31	27.64	Used
	TRUE	High	KLVIIEGDLERTEER		FALSE	0.016468	0.000666919	1	9	2	NP_001239140.1	2	1799.99	0	0.647	0.881947	0	121.4	78.6	1.13552e+06	734698		High	Peak Found	High	0.0002019	0.0009058	2.9	34.81	Used
	TRUE	High	IQVLQQQADDAEERAER		FALSE	0.0369091	0.00101489	1	4	2	NP_001239140.1	1	1998.98	0	0.815	0.959098	0	110.2	89.8	7.84689e+06	6.39837e+06		High	Peak Found	High	0.002806	0.03893	2.15	28.62	Used
	TRUE	High	LVIIEGDLER		FALSE	0.0817446	0.00326873	1	9	1	NP_001239140.1	0	1156.66	0								No Quan Values	High	Not Found	High	0.001074	0.01231	1.91		Not Used
	TRUE	High	HIAEEADR		FALSE	0.107756	0.00429596	2	13	1	NP_001239140.1; XP_003432953.1	0	940.448	0	4.045	0.45321	0	39.6	160.4	4351.46	17601.5	Shared	Peak Found	High	High	0.001527	0.02013	1.33	8.95	Not Used
TRUE	High	Master Protein	XP_536735.3	LOW QUALITY PROTEIN: alpha-enolase [Canis lupus familiaris]	0	FALSE	173.422	46	16	104	8	1	447	49	8.22	263.16	16	8	1.035	0.955956	52.74	94.3	105.7	1.11201e+08	1.24601e+08	High	High
	Checked	Confidence	Sequence	Modifications	Contaminant	Qvality PEP	Qvality q-value	# Protein Groups	# Proteins	# PSMs	Master Protein Accessions	# Missed Cleavages	Theo. MH+ [Da]	# Razor Quan Results	Abundance Ratio: (F4, Sample) / (F3, Control)	Abundance Ratio Adj. P-Value: (F4, Sample) / (F3, Control)	Abundance Ratio Variability [%]: (F4, Sample) / (F3, Control)	Abundances (Grouped): F3, Control	Abundances (Grouped): F4, Sample	Abundance: F3: Control	Abundance: F4: Sample	Quan Info	Found in Sample: [S3] F3: Control	Found in Sample: [S4] F4: Sample	Confidence (by Search Engine): Sequest HT	Percolator q-Value (by Search Engine): Sequest HT	Percolator PEP (by Search Engine): Sequest HT	XCorr (by Search Engine): Sequest HT	Top Apex RT [min]	Quan Usage
	TRUE	High	IDKLMIEMDGTENK	2xOxidation [M5; M8]	FALSE	0.000662061	0	2	2	4	XP_536735.3; XP_013972892.1	1	1668.78	0	8.917	0.0240401	0	20.2	179.8	91877.4	819259	Shared	High	High	High	0	6.656e-05	2.8	20.58	Used
	TRUE	High	LAQSNGWGVMVSHR	1xOxidation [M10]	FALSE	0.00106605	0	1	3	3	XP_536735.3	0	1557.76	0	4.977	0.140166	0	33.5	166.5	1.80236e+06	8.97004e+06		High	High	High	0	9.835e-05	2.77	26.17	Used
	TRUE	High	LAQSNGWGVMVSHR	1xDeamidated [N5]; 1xOxidation [M10]	FALSE	0.00011032	0	1	3	7	XP_536735.3	0	1558.74	0	6.185	0.0703607	0	27.8	172.2	2.82572e+06	1.7476e+07		High	High	High	0	2.745e-05	3.55	26.79	Used
	TRUE	High	SGETEDTFIADLVVGLCTGQIK	1xCarbamidomethyl [C17]	FALSE	2.47045e-07	0	2	5	3	XP_536735.3; XP_013972892.1	0	2353.16	0	0.01	9.75497e-17		200		3.20885e+06		Shared	High	Not Found	High	0	7.571e-08	5.18	114.42	Used
	TRUE	High	SGETEDTFIADLVVGLCTGQIK	1xCarbamidomethyl [C17]; 1xDeamidated [Q20]	FALSE	6.66999e-06	0	2	5	3	XP_536735.3; XP_013972892.1	0	2354.14	0								Not Reliable	High	High	High	0	1.3e-06	4.69		Not Used
	TRUE	High	SGKYDLDFKSPDDPSR		FALSE	4.51798e-05	0	1	1	14	XP_536735.3	2	1826.86	0	1.035	0.991247	0	98.3	101.7	4.48324e+07	4.64033e+07		High	High	High	0	3.823e-05	3.65	28.92	Used
	TRUE	High	AGYTDKVVIGMDVAASEFFR	1xOxidation [M11]	FALSE	1.13351e-05	0	2	2	6	XP_536735.3; XP_013972892.1	1	2192.07	0	0.524	0.784592	0	131.2	68.8	4.17438e+06	2.18662e+06	Shared	High	High	High	0	2.061e-06	4.46	66.88	Used
	TRUE	High	AGYTDKVVIGMDVAASEFFR		FALSE	0.000470181	0	2	2	1	XP_536735.3; XP_013972892.1	1	2176.07	0								No Quan Values	High	Not Found	High	0	5.01e-05	3.57		Not Used
	TRUE	High	AAVPSGASTGIYEALELR		FALSE	4.28276e-06	0	1	4	6	XP_536735.3	0	1804.94	0	0.886	0.9743	0	106	94	7.44259e+06	6.59532e+06		High	High	High	0	3.295e-06	2.78	68.23	Used
	TRUE	High	AAVPSGASTGIYEALELRDNDK		FALSE	0.00152112	0	1	1	2	XP_536735.3	1	2277.14	0								No Quan Values	High	High	High	0	0.0001292	2.43		Not Used
	TRUE	High	FGANAILGVSLAVCK	1xCarbamidomethyl [C14]	FALSE	8.04721e-05	0	1	4	2	XP_536735.3	0	1519.83	0								No Quan Values	High	Not Found	High	0	1.114e-05	2.77		Not Used
	TRUE	High	DYPVVSIEDPFDQDDWEAWQK	1xDeamidated [Q]	FALSE	7.08367e-05	0	2	2	2	XP_536735.3; XP_013972892.1	0	2583.12	0								Not Reliable	Not Found	High	High	0	9.988e-06	2.06		Not Used
	TRUE	High	VVIGMDVAASEFFR	1xOxidation [M5]	FALSE	5.52584e-05	0	2	2	3	XP_536735.3; XP_013972892.1	0	1556.78	0	1.821	0.812785	0	70.9	129.1	2.63159e+06	4792282	Shared	High	High	High	0	8.082e-06	3.19	63.92	Used
	TRUE	High	VNQIGSVTESLQACK	1xCarbamidomethyl [C14]	FALSE	1.26202e-05	0	1	3	18	XP_536735.3	0	1633.82	0	0.667	0.893446	0	120	80	1.9277e+07	1.28554e+07		High	High	High	0	5.275e-05	4.03	35.31	Used
	TRUE	High	VNQIGSVTESLQACK	1xCarbamidomethyl [C14]; 1xDeamidated [Q/N]	FALSE	0.000371752	0	1	3	4	XP_536735.3	0	1634.81	0								No Quan Values	High	Not Found	High	0	4.112e-05	3.24		Not Used
	TRUE	High	GNPTVEVDLYTSK		FALSE	4.05791e-05	0	1	1	8	XP_536735.3	0	1422.71	0	0.826	0.967759	0	109.5	90.5	8.18044e+06	6.76016e+06		High	High	High	0	9.659e-06	3.5	35.72	Used
	TRUE	High	FTASAGIQVVGDDLTVTNPKR	1xDeamidated [Q8]	FALSE	8.15597e-05	0	2	2	2	XP_536735.3; XP_013972892.1	1	2190.14	0								Not Reliable	High	Not Found	High	0	1.127e-05	4.23		Not Used
	TRUE	High	FTASAGIQVVGDDLTVTNPKR		FALSE	5.0641e-05	0	2	2	2	XP_536735.3; XP_013972892.1	1	2189.16	0								No Quan Values	High	High	High	0	7.505e-06	3.62		Not Used
	TRUE	High	FTASAGIQVVGDDLTVTNPK	1xDeamidated [Q8]	FALSE	2.60557e-05	0	2	2	5	XP_536735.3; XP_013972892.1	0	2034.04	0								Not Reliable	High	High	High	0.0001485	0.0004112	4.38		Not Used
	TRUE	High	FTASAGIQVVGDDLTVTNPK		FALSE	3.67008e-06	0	2	2	9	XP_536735.3; XP_013972892.1	0	2033.05	0	1.171	0.971875	0	92.1	107.9	3.04732e+06	3.56735e+06	Shared	High	High	High	0	1.12e-06	4.21	59.6	Used
	TRUE	High	YDLDFKSPDDPSR		FALSE	0.000895418	0	1	1	2	XP_536735.3	1	1554.71	0	0.733	0.920452	0	115.4	84.6	2.82503e+06	2.07199e+06		High	High	High	0	8.514e-05	2.15	33.95	Used
	TRUE	High	YITPDQLADLYK		FALSE	0.00468971	0.000480221	2	2	3	XP_536735.3; XP_013972892.1	0	1439.74	0	0.899	0.9743	0	105.3	94.7	10796592	9701646	Shared	High	High	High	0.0001485	0.0002863	2.68	63.89	Used
	TRUE	High	DYPVVSIEDPFDQDDWEAWQK		FALSE	0.00691436	0.000480221	2	2	2	XP_536735.3; XP_013972892.1	0	2582.14	0	100	9.75497e-17			200		1430131	Shared	High	High	High	0.001527	0.01913	2.5	91.82	Used
	TRUE	High	IDKLMIEMDGTENK	1xOxidation [M8]	FALSE	0.0199704	0.000666919	2	2	2	XP_536735.3; XP_013972892.1	1	1652.79	0	14.901	0.00130683	0	12.6	187.4	65198.8	971517	Shared	Peak Found	High	High	0.0002019	0.001149	2.11	24.79	Used
	TRUE	High	LAQSNGWGVMVSHR		FALSE	0.0299049	0.000865703	1	3	1	XP_536735.3	0	1541.76	0								No Quan Values	Not Found	High	High	0.0002602	0.002069	1.83		Not Used
	TRUE	High	AAVPSGASTGIYEALELRDNDK	1xDeamidated [N20]	FALSE	0.0833134	0.00326873	1	1	1	XP_536735.3	1	2278.12	0								No Quan Values	High	Not Found	High	0.001074	0.0127	3.4		Not Used
TRUE	High	Master Protein	XP_005628950.1	adenylyl cyclase-associated protein 1 isoform X1 [Canis lupus familiaris]	0	FALSE	173.123	62	19	113	1	1	475	51.4	7.52	240.02	19	0	0.748	0.885001	0	114.4	85.6	7.55728e+06	5.65564e+06	High	High
	Checked	Confidence	Sequence	Modifications	Contaminant	Qvality PEP	Qvality q-value	# Protein Groups	# Proteins	# PSMs	Master Protein Accessions	# Missed Cleavages	Theo. MH+ [Da]	# Razor Quan Results	Abundance Ratio: (F4, Sample) / (F3, Control)	Abundance Ratio Adj. P-Value: (F4, Sample) / (F3, Control)	Abundance Ratio Variability [%]: (F4, Sample) / (F3, Control)	Abundances (Grouped): F3, Control	Abundances (Grouped): F4, Sample	Abundance: F3: Control	Abundance: F4: Sample	Quan Info	Found in Sample: [S3] F3: Control	Found in Sample: [S4] F4: Sample	Confidence (by Search Engine): Sequest HT	Percolator q-Value (by Search Engine): Sequest HT	Percolator PEP (by Search Engine): Sequest HT	XCorr (by Search Engine): Sequest HT	Top Apex RT [min]	Quan Usage
	TRUE	High	LGLVFDDVVGIVEIINSR		FALSE	6.4067e-06	0	2	2	5	XP_005628950.1; XP_013974803.1	0	1958.1	0	0.448	0.686745	0	138.1	61.9	4.41178e+06	1.97792e+06	Shared	High	High	High	0	1.26e-06	3.63	132.7	Not Used
	TRUE	High	VENQENVSNLVIDDTELKQVAYIYK	1xDeamidated [N/Q]	FALSE	0.000752083	0	2	2	3	XP_005628950.1; XP_013974803.1	1	2925.47	0	100	9.75497e-17			200		800564	Shared	High	High	High	0	7.384e-05	4.08	79.01	Not Used
	TRUE	High	VENQENVSNLVIDDTELK	1xDeamidated [N/Q]	FALSE	8.15794e-06	0	2	2	5	XP_005628950.1; XP_013974803.1	0	2060	0								Not Reliable	High	High	High	0	3.205e-06	3.37		Not Used
	TRUE	High	VENQENVSNLVIDDTELK		FALSE	2.71327e-06	0	2	2	2	XP_005628950.1; XP_013974803.1	0	2059.02	0								No Quan Values	High	High	High	0	6.01e-07	2.58		Not Used
	TRUE	High	LEAVSHASDMHCGYGDSAPK	1xCarbamidomethyl [C12]	FALSE	0.000301923	0	2	2	5	XP_005628950.1; XP_013974803.1	0	2131.92	0	3.047	0.443173	0	49.4	150.6	419267	1.27761e+06	Shared	High	High	High	0	3.457e-05	2.45	17.56	Not Used
	TRUE	High	LEAVSHASDMHCGYGDSAPK	1xCarbamidomethyl [C12]; 1xOxidation [M10]	FALSE	1.82598e-06	0	2	2	6	XP_005628950.1; XP_013974803.1	0	2147.91	0	3.245	0.397109	0	47.1	152.9	456645	1.48175e+06	Shared	High	High	High	0	5.317e-05	4.06	14.01	Not Used
	TRUE	High	LSDLLAPISEQIQEVITYR		FALSE	2.15962e-06	0	2	2	5	XP_005628950.1; XP_013974803.1	0	2188.19	0	0.01	9.75497e-17		200		4.65594e+06		Shared	High	High	High	0	4.916e-07	3.72	110.05	Not Used
	TRUE	High	LSDLLAPISEQIQEVITYR	1xDeamidated [Q]	FALSE	9.84694e-07	0	2	2	9	XP_005628950.1; XP_013974803.1	0	2189.17	0								No Quan Values	High	High	High	0	1.057e-05	3.89		Not Used
	TRUE	High	TGPVAQELSGLPSGPSAGSGPPPPPPGPPPPPVPTSSGSDESASR	1xDeamidated [Q6]	FALSE	0.00080969	0	2	2	4	XP_005628950.1; XP_013974803.1	0	4155.02	0	0.646	0.880668	0	121.5	78.5	924098	597185	Shared	High	Peak Found	High	0	7.856e-05	4.34	72.93	Not Used
	TRUE	High	TGPVAQELSGLPSGPSAGSGPPPPPPGPPPPPVPTSSGSDESASR		FALSE	0.000293925	0	2	2	3	XP_005628950.1; XP_013974803.1	0	4154.03	0	0.01	9.75497e-17		200		44369		Shared	High	Not Found	High	0	3.369e-05	4.49	149.55	Not Used
	TRUE	High	SALFAQINQGESITHALK		FALSE	0.000509611	0	2	2	3	XP_005628950.1; XP_013974803.1	0	1928.02	0	0.745	0.924649	0	114.6	85.4	6.48411e+06	4.82956e+06	Shared	High	High	High	0.0001485	0.0004954	2.83	57.38	Not Used
	TRUE	High	AGAAPYVQAFDSLLAGPVAEYLK	1xDeamidated [Q8]	FALSE	0.000120379	0	1	1	7	XP_005628950.1	0	2352.21	0								No Quan Values	High	High	High	0	1.584e-05	4.27		Not Used
	TRUE	High	AGAAPYVQAFDSLLAGPVAEYLK		FALSE	4.05791e-05	0	1	1	10	XP_005628950.1	0	2351.23	0	0.748	0.926594	0	114.4	85.6	7.55728e+06	5.65564e+06		High	High	High	0	7.593e-06	4	119.39	Used
	TRUE	High	EMNDAAMFYTNR	2xOxidation [M2; M7]	FALSE	0.000837313	0	2	2	2	XP_005628950.1; XP_013974803.1	0	1494.6	0	6.117	0.0737461	0	28.1	171.9	157238	961749	Shared	High	High	High	0	8.068e-05	2.57	24.01	Not Used
	TRUE	High	EMNDAAMFYTNR	1xOxidation [M]	FALSE	0.000451624	0	2	2	4	XP_005628950.1; XP_013974803.1	0	1478.6	0	1.694	0.847623	0	74.2	125.8	833376	1.41152e+06	Shared	High	High	High	0	0.0001046	3.53	29.37	Not Used
	TRUE	High	ALLVTASQCQQPAGNK	1xCarbamidomethyl [C9]	FALSE	2.92052e-05	0	2	2	4	XP_005628950.1; XP_013974803.1	0	1685.86	0	3.116	0.425211	0	48.6	151.4	1.61336e+06	5.02742e+06	Shared	High	High	High	0	9.733e-05	3.68	23.08	Not Used
	TRUE	High	ALLVTASQCQQPAGNK	1xCarbamidomethyl [C9]; 1xDeamidated [Q]	FALSE	1.01808e-05	0	2	2	4	XP_005628950.1; XP_013974803.1	0	1686.85	0	3.213	0.480238	0	47.5	152.5	161446	518689	Shared	High	High	High	0	1.558e-05	3.8	24.28	Not Used
	TRUE	High	SGPKPFSAPKPGVSPSPKPTAK		FALSE	0.0065103	0.000480221	2	2	11	XP_005628950.1; XP_013974803.1	0	2162.2	0	1.449	0.900109	0	81.7	118.3	1.12515e+07	1.63064e+07	Shared	High	High	High	0.000303	0.002784	3.3	18.82	Not Used
	TRUE	High	AVGRLEAVSHASDMHCGYGDSAPK	1xCarbamidomethyl [C16]; 1xOxidation [M14]	FALSE	0.00424149	0.000480221	2	2	3	XP_005628950.1; XP_013974803.1	1	2531.14	0	0.745	0.924649	0	114.6	85.4	1.21916e+06	908054	Shared	High	Peak Found	High	0.000303	0.005503	3.44	19.01	Not Used
	TRUE	High	KEPAVLELEGKK		FALSE	0.0128698	0.000480221	2	2	4	XP_005628950.1; XP_013974803.1	2	1340.78	0	4.459	0.18774	0	36.6	163.4	963999	4.29866e+06	Shared	High	High	High	0.007518	0.09605	2.94	23.61	Not Used
	TRUE	High	LVTTVTEIAG		FALSE	0.0033326	0.000480221	2	2	4	XP_005628950.1; XP_013974803.1	0	1003.57	0	0.458	0.701353	0	137.2	62.8	2.65835e+06	1.21764e+06	Shared	High	High	High	0.0001485	0.0002263	2.75	35.98	Not Used
	TRUE	High	VENQENVSNLVIDDTELKQVAYIYK		FALSE	0.0116443	0.000480221	2	2	1	XP_005628950.1; XP_013974803.1	1	2924.49	0	0.25	0.250362	0	160	40	1.71208e+06	427873	Shared	High	Peak Found	High	0.0001485	0.0006131	2.64	79.11	Not Used
	TRUE	High	LFNHLSAVSESIQALGWVAMAPKPGPYVK	1xDeamidated [Q13]; 1xOxidation [M20]	FALSE	0.0250199	0.000666919	2	2	1	XP_005628950.1; XP_013974803.1	0	3127.63	0								No Quan Values	High	Not Found	High	0.0002019	0.001579	3.09		Not Used
	TRUE	High	KEPAVLELEGK		FALSE	0.0162502	0.000666919	2	2	2	XP_005628950.1; XP_013974803.1	1	1212.68	0	4.535	0.178924	0	36.1	163.9	666835	3.02406e+06	Shared	High	High	High	0.001395	0.01532	1.74	28.86	Not Used
	TRUE	High	HAEMVHTGLKLER	1xOxidation [M4]	FALSE	0.0426252	0.00101489	2	2	3	XP_005628950.1; XP_013974803.1	1	1536.8	0	4.063	0.26457	0	39.5	160.5	186935	759586	Shared	High	High	High	0.002442	0.02846	2.43	15.35	Not Used
	TRUE	High	LFNHLSAVSESIQALGWVAMAPKPGPYVK	1xOxidation [M20]	FALSE	0.0426252	0.00101489	2	2	1	XP_005628950.1; XP_013974803.1	0	3126.64	0								No Quan Values	High	Not Found	High	0.000303	0.003733	4.55		Not Used
	TRUE	High	LSDLLAPISEQIQEVITYREK		FALSE	0.0933315	0.00414812	2	2	1	XP_005628950.1; XP_013974803.1	1	2445.32	0								No Quan Values	High	Not Found	High	0.001436	0.01557	2.67		Not Used
	TRUE	High	VPTISINK		FALSE	0.158265	0.00784511	2	3	1	XP_005628950.1; XP_013974803.1	0	871.525	0	2.378	0.737591	0	59.2	140.8	100149	238141	Shared	Peak Found	High	High	0.002806	0.03867	1.48	24.53	Not Used
TRUE	High	Master Protein	XP_003640008.1	tubulin alpha-1C chain [Canis lupus familiaris]	0	FALSE	171.683	61	20	138	7	1	449	49.9	5.1	299.77	20	14	1.076	0.955956	30.55	95.6	104.4	1.84498e+08	2.0159e+08	High	High
	Checked	Confidence	Sequence	Modifications	Contaminant	Qvality PEP	Qvality q-value	# Protein Groups	# Proteins	# PSMs	Master Protein Accessions	# Missed Cleavages	Theo. MH+ [Da]	# Razor Quan Results	Abundance Ratio: (F4, Sample) / (F3, Control)	Abundance Ratio Adj. P-Value: (F4, Sample) / (F3, Control)	Abundance Ratio Variability [%]: (F4, Sample) / (F3, Control)	Abundances (Grouped): F3, Control	Abundances (Grouped): F4, Sample	Abundance: F3: Control	Abundance: F4: Sample	Quan Info	Found in Sample: [S3] F3: Control	Found in Sample: [S4] F4: Sample	Confidence (by Search Engine): Sequest HT	Percolator q-Value (by Search Engine): Sequest HT	Percolator PEP (by Search Engine): Sequest HT	XCorr (by Search Engine): Sequest HT	Top Apex RT [min]	Quan Usage
	TRUE	High	AYHEQLTVAEITNACFEPANQMVK	1xCarbamidomethyl [C15]; 1xDeamidated [Q/N]; 1xOxidation [M22]	FALSE	0.101249	0.00429596	1	1	2	XP_003640008.1	0	2781.29	0								Not Reliable	High	Not Found	High	0.001527	0.01806	2.77		Not Used
	TRUE	High	AYHEQLTVAEITNACFEPANQMVK	1xCarbamidomethyl [C15]; 1xOxidation [M22]	FALSE	0.150851	0.00734612	1	1	1	XP_003640008.1	0	2780.3	0	0.559	0.822759	0	128.3	71.7	2.39424e+06	1.3394e+06		High	Peak Found	High	0.002664	0.03568	2.88	58.03	Used
TRUE	High	Master Protein	XP_533231.1	cofilin-1 [Canis lupus familiaris]	0	FALSE	171.036	63	13	141	13	1	166	18.5	8.09	398.89	13	0	1.457	0.974217	56.49	92.9	107.1	2.35192e+08	2.71318e+08	High	High
	Checked	Confidence	Sequence	Modifications	Contaminant	Qvality PEP	Qvality q-value	# Protein Groups	# Proteins	# PSMs	Master Protein Accessions	# Missed Cleavages	Theo. MH+ [Da]	# Razor Quan Results	Abundance Ratio: (F4, Sample) / (F3, Control)	Abundance Ratio Adj. P-Value: (F4, Sample) / (F3, Control)	Abundance Ratio Variability [%]: (F4, Sample) / (F3, Control)	Abundances (Grouped): F3, Control	Abundances (Grouped): F4, Sample	Abundance: F3: Control	Abundance: F4: Sample	Quan Info	Found in Sample: [S3] F3: Control	Found in Sample: [S4] F4: Sample	Confidence (by Search Engine): Sequest HT	Percolator q-Value (by Search Engine): Sequest HT	Percolator PEP (by Search Engine): Sequest HT	XCorr (by Search Engine): Sequest HT	Top Apex RT [min]	Quan Usage
	TRUE	High	LGGSAVISLEGKPL		FALSE	2.80587e-06	0	1	1	7	XP_533231.1	0	1340.78	0	0.902	0.974988	0	105.2	94.8	35909492	32374572		High	High	High	0	6.179e-07	4.4	51.49	Used
	TRUE	High	KEDLVFIFWAPESAPLK		FALSE	6.0703e-05	0	1	3	4	XP_533231.1	1	1990.07	0	1.614	0.870527	0	76.5	123.5	1.48866e+06	2.40218e+06		High	High	High	0	8.753e-06	3.61	92.43	Used
	TRUE	High	KAVLFCLSEDKK	1xCarbamidomethyl [C6]	FALSE	0.000214407	0	1	2	6	XP_533231.1	2	1437.78	0	2.086	0.733425	0	64.8	135.2	5.02339e+06	1.04798e+07		High	High	High	0	0.0001434	3.33	31.38	Used
	TRUE	High	HELQANCYEEVKDR	1xCarbamidomethyl [C7]	FALSE	3.79534e-06	0	1	1	6	XP_533231.1	1	1790.81	0	4.621	0.171595	0	35.6	164.4	422629	1.95282e+06		High	High	High	0	8.027e-07	3.65	16.88	Used
	TRUE	High	HELQANCYEEVKDR	1xCarbamidomethyl [C7]; 1xDeamidated [Q/N]	FALSE	5.0982e-05	0	1	1	3	XP_533231.1	1	1791.8	0	100	9.75497e-17			200		57782.2		High	High	High	0	7.512e-06	3.58	18.05	Used
	TRUE	High	LTGIKHELQANCYEEVK	1xCarbamidomethyl [C12]	FALSE	0.00024194	0	1	2	3	XP_533231.1	1	2032.02	0	2.624	0.567021	0	55.2	144.8	657691	1.72568e+06		High	High	High	0.0002019	0.001317	2.99	28.9	Used
	TRUE	High	LTGIKHELQANCYEEVK	1xCarbamidomethyl [C12]; 1xDeamidated [Q/N]	FALSE	0.000154314	0	1	2	2	XP_533231.1	1	2033	0								Not Reliable	Not Found	High	High	0	3.466e-05	2.77		Not Used
	TRUE	High	LTGIKHELQANCYEEVKDR	1xCarbamidomethyl [C12]	FALSE	5.79304e-06	0	1	1	11	XP_533231.1	2	2303.14	0	1.071	0.982102	0	96.6	103.4	3.24193e+07	3.47066e+07		High	High	High	0	1.155e-06	4.01	27.43	Used
	TRUE	High	LTGIKHELQANCYEEVKDR	1xCarbamidomethyl [C12]; 1xDeamidated [N/Q]	FALSE	2.27824e-05	0	1	1	18	XP_533231.1	2	2304.13	0	1.162	0.971875	0	92.5	107.5	2055536	2.38859e+06		High	High	High	0.0002019	0.001815	3.8	29.81	Used
	TRUE	High	NIILEEGKEILVGDVGQTVDDPYATFVK		FALSE	4.93435e-09	0	1	2	21	XP_533231.1	1	3062.59	0	0.659	0.888223	0	120.6	79.4	70012073	4.61087e+07		High	High	High	0	2.592e-09	5.73	88.54	Used
	TRUE	High	NIILEEGKEILVGDVGQTVDDPYATFVK	1xDeamidated [N/Q]	FALSE	1.03229e-07	0	1	2	21	XP_533231.1	1	3063.58	0	100	9.75497e-17			200		3.52739e+06		High	High	High	0	9.048e-06	5.45	88.5	Used
	TRUE	High	NIILEEGKEILVGDVGQTVDDPYATFVK	2xDeamidated [N1; Q17]	FALSE	1.74178e-05	0	1	2	1	XP_533231.1	1	3064.56	0								No Quan Values	High	Not Found	High	0	2.983e-06	3.74		Not Used
	TRUE	High	YALYDATYETK		FALSE	3.10239e-05	0	1	4	14	XP_533231.1	0	1337.63	0	1.298	0.936187	0	87	113	5.91681e+07	7.68183e+07		High	High	High	0	4.892e-06	3.54	33.67	Used
	TRUE	High	EILVGDVGQTVDDPYATFVK	1xDeamidated [Q9]	FALSE	4.28371e-07	0	1	2	2	XP_533231.1	0	2167.08	0								Not Reliable	High	High	High	0	1.218e-07	4.41		Not Used
	TRUE	High	EILVGDVGQTVDDPYATFVK		FALSE	2.76846e-06	0	1	2	5	XP_533231.1	0	2166.1	0	1.457	0.898424	0	81.4	118.6	2.18412e+06	3.18135e+06		High	High	High	0	6.082e-07	4.82	70.69	Used
	TRUE	High	KLTGIKHELQANCYEEVK	1xCarbamidomethyl [C13]	FALSE	0.0137571	0.000480221	1	2	3	XP_533231.1	2	2160.11	0	1.874	0.795792	0	69.6	130.4	831518	1.55856e+06		High	High	High	0.0001485	0.0007342	3.38	26.87	Used
	TRUE	High	KNIILEEGKEILVGDVGQTVDDPYATFVK	1xDeamidated [Q18]	FALSE	0.00927924	0.000480221	1	2	1	XP_533231.1	2	3191.67	0								Not Reliable	High	Not Found	High	0.0001485	0.0004912	2.45		Not Used
	TRUE	High	LTGIKHELQANCYEEVKDR	1xCarbamidomethyl [C12]; 2xDeamidated [Q9; N11]	FALSE	0.00326628	0.000480221	1	1	3	XP_533231.1	2	2305.11	0								Not Reliable	Not Found	High	High	0.0008078	0.01024	3.72		Not Used
	TRUE	High	KNIILEEGKEILVGDVGQTVDDPYATFVK		FALSE	0.0184398	0.000666919	1	2	2	XP_533231.1	2	3190.69	0								No Quan Values	High	High	High	0.0002019	0.001281	4.04		Not Used
	TRUE	High	ESKKEDLVFIFWAPESAPLK		FALSE	0.0321523	0.000865703	1	3	2	XP_533231.1	2	2334.24	0	0.623	0.87102	0	123.2	76.8	3776301	2.35434e+06		High	High	High	0.006124	0.07923	2.23	84.72	Used
	TRUE	High	KLTGIKHELQANCYEEVK	1xCarbamidomethyl [C13]; 1xDeamidated [Q/N]	FALSE	0.0409862	0.00101489	1	2	2	XP_533231.1	2	2161.1	0								Not Reliable	High	High	High	0.000303	0.003459	4.02		Not Used
	TRUE	High	AVLFCLSEDKK	1xCarbamidomethyl [C5]	FALSE	0.0865358	0.00364368	1	2	4	XP_533231.1	1	1309.68	0	2.433	0.634348	0	58.3	141.7	21243644	51681116		High	High	High	0.007694	0.09861	2.15	37.96	Used
TRUE	High	Master Protein	XP_541640.2	alpha-actinin-4 isoform X1 [Canis lupus familiaris]	0	FALSE	165.471	48	35	108	19	1	933	107.3	5.43	218.1	35	0	0.551	0.668443	11.07	125.1	74.9	1.65257e+07	9.90293e+06	High	High
	Checked	Confidence	Sequence	Modifications	Contaminant	Qvality PEP	Qvality q-value	# Protein Groups	# Proteins	# PSMs	Master Protein Accessions	# Missed Cleavages	Theo. MH+ [Da]	# Razor Quan Results	Abundance Ratio: (F4, Sample) / (F3, Control)	Abundance Ratio Adj. P-Value: (F4, Sample) / (F3, Control)	Abundance Ratio Variability [%]: (F4, Sample) / (F3, Control)	Abundances (Grouped): F3, Control	Abundances (Grouped): F4, Sample	Abundance: F3: Control	Abundance: F4: Sample	Quan Info	Found in Sample: [S3] F3: Control	Found in Sample: [S4] F4: Sample	Confidence (by Search Engine): Sequest HT	Percolator q-Value (by Search Engine): Sequest HT	Percolator PEP (by Search Engine): Sequest HT	XCorr (by Search Engine): Sequest HT	Top Apex RT [min]	Quan Usage
	TRUE	High	LMLLLEVISGER	1xOxidation [M2]	FALSE	0.000237117	0	3	15	5	XP_866874.1; XP_536333.2; XP_541640.2	0	1388.78	0	0.505	0.758432	0	132.9	67.1	3.53285e+06	1.78268e+06	Shared	High	High	High	0	3.793e-05	2.78	85	Not Used
	TRUE	High	HRPELIEYDKLR		FALSE	0.00149082	0	1	5	1	XP_541640.2	1	1568.85	0	0.529	0.790926	0	130.8	69.2	1.72774e+06	914444		High	Peak Found	High	0	0.0001275	2.22	28.33	Used
	TRUE	High	HRPELIEYDK		FALSE	0.000666518	0	1	5	1	XP_541640.2	0	1299.67	0	0.297	0.398848	0	154.2	45.8	352257	104725		High	Peak Found	High	0	6.719e-05	2.79	18.46	Used
	TRUE	High	VGWEQLLTTIAR		FALSE	6.0703e-05	0	2	10	5	XP_866874.1; XP_541640.2	0	1386.77	0	0.574	0.834127	0	127.1	72.9	15642006	8979298	Shared	High	High	High	0	8.758e-06	3.61	95.16	Not Used
	TRUE	High	KTFTAWCNSHLR	1xCarbamidomethyl [C7]	FALSE	0.000184974	0	3	12	2	XP_866874.1; XP_536333.2; XP_541640.2	1	1520.74	0	0.467	0.718515	0	136.3	63.7	4252949	1.9855e+06	Shared	High	High	High	0.0001485	0.0002605	2.5	26.89	Not Used
	TRUE	High	KHEAFESDLAAHQDR		FALSE	0.000635935	0	3	12	3	XP_866874.1; XP_536333.2; XP_541640.2	1	1753.83	0	0.365	0.564997	0	146.5	53.5	646228	235961	Shared	High	High	High	0	6.436e-05	2.46	15.89	Not Used
	TRUE	High	VLAVNQENEHLMEDYER	1xOxidation [M12]	FALSE	8.21089e-05	0	1	5	2	XP_541640.2	0	2104.96	0	0.461	0.706678	0	136.9	63.1	1.12977e+06	521332		High	High	High	0.0001485	0.0007148	2.16	29.23	Used
	TRUE	High	VLAVNQENEHLMEDYER	1xDeamidated [N8]; 1xOxidation [M12]	FALSE	4.16834e-05	0	1	5	2	XP_541640.2	0	2105.94	0								Not Reliable	High	High	High	0	6.339e-06	2.23		Not Used
	TRUE	High	LSGSNPYTTVTPQIINSK		FALSE	0.000394898	0	1	5	2	XP_541640.2	0	1920.01	0	0.551	0.814671	0	129	71	1.12879e+06	621421		High	High	High	0	4.344e-05	2.58	43.02	Used
	TRUE	High	SIVDYKPNLDLLEQQHQLIQEALIFDNK		FALSE	0.000662061	0	1	5	1	XP_541640.2	0	3324.75	0								No Quan Values	High	Not Found	High	0	6.664e-05	3.22		Not Used
	TRUE	High	LVSIGAEEIVDGNAK		FALSE	0.000161738	0	1	5	2	XP_541640.2	0	1514.81	0	0.784	0.942464	0	112.1	87.9	1.76426e+06	1.38246e+06		High	High	High	0.0001485	0.0002351	3.05	41.79	Used
	TRUE	High	TINEVENQILTR		FALSE	8.54833e-05	0	2	10	5	XP_866874.1; XP_541640.2	0	1429.76	0	0.52	0.781136	0	131.5	68.5	16459760	8564588	Shared	High	High	High	0	1.177e-05	3.18	40.99	Not Used
	TRUE	High	MTLGMIWTIILR	2xOxidation [M1; M5]	FALSE	0.000106679	0	3	15	7	XP_866874.1; XP_536333.2; XP_541640.2	0	1479.81	0	0.521	0.781435	0	131.5	68.5	1.19828e+06	624476	Shared	High	High	High	0	1.417e-05	3.28	102.61	Not Used
	TRUE	High	FAIQDISVEETSAK		FALSE	3.95041e-05	0	3	15	3	XP_866874.1; XP_536333.2; XP_541640.2	0	1537.77	0	0.616	0.864496	0	123.8	76.2	9008748	5.54869e+06	Shared	High	High	High	0	6.033e-06	3.33	46.32	Not Used
	TRUE	High	ETTDTDTADQVIASFK		FALSE	0.000486225	0	1	5	2	XP_541640.2	0	1741.81	0	0.415	0.638344	0	141.3	58.7	1190204	493870		High	High	High	0	0.0001392	3.81	52.79	Used
	TRUE	High	CQLEINFNTLQTK	1xCarbamidomethyl [C1]	FALSE	5.45216e-05	0	3	15	3	XP_866874.1; XP_536333.2; XP_541640.2	0	1608.81	0	0.01	9.75497e-17		200		1.19462e+06		Shared	High	Not Found	High	0	0.0001398	2.83	55.37	Not Used
	TRUE	High	ELPPDQAEYCIAR	1xCarbamidomethyl [C10]	FALSE	0.000212973	0	2	10	8	XP_866874.1; XP_541640.2	0	1561.73	0	1.276	0.942464	0	87.9	112.1	11086425	1.41441e+07	Shared	High	High	High	0.0001485	0.0002174	2.5	31.73	Not Used
	TRUE	High	AIMTYVSSFYHAFSGAQK	1xOxidation [M3]	FALSE	5.0664e-07	0	2	8	8	XP_866874.1; XP_541640.2	0	2023.96	0	0.513	0.771522	0	132.2	67.8	1.29315e+07	6.63048e+06	Shared	High	High	High	0	1.407e-07	4.56	71.42	Not Used
	TRUE	High	AIMTYVSSFYHAFSGAQK	1xDeamidated [Q17]; 1xOxidation [M3]	FALSE	0.000101783	0	2	8	3	XP_866874.1; XP_541640.2	0	2024.94	0								Not Reliable	High	High	High	0	1.366e-05	4.6		Not Used
	TRUE	High	AIMTYVSSFYHAFSGAQK		FALSE	7.62832e-06	0	2	8	4	XP_866874.1; XP_541640.2	0	2007.96	0	0.128	0.0293372	0	177.3	22.7	3.10701e+06	397728	Shared	High	High	High	0	1.465e-06	4.59	85.83	Not Used
	TRUE	High	EGLLLWCQR	1xCarbamidomethyl [C7]	FALSE	0.00248156	0.000331607	3	15	4	XP_866874.1; XP_536333.2; XP_541640.2	0	1174.6	0	0.8	0.951058	0	111.1	88.9	1.58147e+06	1.2659e+06	Shared	High	High	High	0.0001092	0.0001851	2.98	55.83	Not Used
	TRUE	High	DYETATLSDIK		FALSE	0.00201592	0.000331607	1	5	2	XP_541640.2	0	1255.61	0	0.905	0.975735	0	105	95	1.86281e+06	1.68497e+06		High	High	High	0.0001092	0.00016	2.17	33.77	Used
	TRUE	High	RDHALLEEQSKQQSNEHLR		FALSE	0.00207071	0.000331607	1	5	2	XP_541640.2	2	2318.16	0	0.01	9.75497e-17		200		158216			High	Not Found	High	0.0001485	0.0003877	3.27	13.71	Used
	TRUE	High	QRDYETATLSDIK		FALSE	0.0142233	0.000480221	1	5	1	XP_541640.2	1	1539.76	0	0.252	0.283721	0	159.7	40.3	731480	184362		High	Peak Found	High	0.0001485	0.00076	2.68	27.58	Used
	TRUE	High	ASIHEAWTDGKEAMLK	1xOxidation [M14]	FALSE	0.0133061	0.000480221	1	5	2	XP_541640.2	1	1802.87	0	0.613	0.862055	0	124	76	1.44577e+06	885883		High	High	High	0.0001485	0.0007075	2.7	26.77	Used
	TRUE	High	MAPYQGPDAVPGALDYK	1xDeamidated [Q5]; 1xOxidation [M1]	FALSE	0.00592805	0.000480221	1	5	1	XP_541640.2	0	1809.84	0								Not Reliable	Not Found	High	High	0.0001485	0.0003397	1.96		Not Used
	TRUE	High	GYEEWLLNEIR		FALSE	0.00303419	0.000480221	3	12	1	XP_866874.1; XP_536333.2; XP_541640.2	0	1421.71	0								No Quan Values	High	Not Found	High	0.0001485	0.0002124	2.43		Not Used
	TRUE	High	KHEAFESDLAAHQDRVEQIAAIAQELNELDYYDSHNVNTR	1xDeamidated [Q]	FALSE	0.00850711	0.000480221	1	5	2	XP_541640.2	2	4641.19	0								No Quan Values	High	Not Found	High	0.0001485	0.0005437	4.08		Not Used
	TRUE	High	KDDPVTNLNNAFEVAEK		FALSE	0.0162502	0.000666919	1	5	1	XP_541640.2	1	1903.94	0								No Quan Values	High	Not Found	High	0.0002019	0.0008899	2.67		Not Used
	TRUE	High	MLDAEDIVNTARPDEK	1xOxidation [M1]	FALSE	0.0256908	0.000666919	1	3	1	XP_541640.2	0	1832.87	0	0.641	0.877459	0	121.8	78.2	1.34967e+06	865691		High	Peak Found	High	0.0002019	0.001629	2.33	38.17	Used
	TRUE	High	TINEVENQILTR	1xDeamidated [N/Q]	FALSE	0.0338894	0.000865703	2	10	8	XP_866874.1; XP_541640.2	0	1430.75	0	0.897	0.974468	0	105.4	94.6	496423	445275	Shared	High	High	High	0.005204	0.06976	2.75	34.22	Not Used
	TRUE	High	DGLAFNALIHR		FALSE	0.0315235	0.000865703	1	6	1	XP_541640.2	0	1226.66	0	0.01	9.75497e-17		200		1.38339e+06			High	Not Found	High	0.0002602	0.002239	1.91	51.97	Used
	TRUE	High	AIMTYVSSFYHAFSGAQK	1xDeamidated [Q17]	FALSE	0.0498386	0.00101489	2	8	2	XP_866874.1; XP_541640.2	0	2008.95	0								No Quan Values	High	High	High	0.000303	0.004904	2.25		Not Used
	TRUE	High	ASFNHFDKDHGGALGPEEFK		FALSE	0.0637194	0.00177815	1	3	2	XP_541640.2	1	2203.02	0	0.987	0.995386	0	100.6	99.4	2.2722e+06	2243770		High	High	High	0.000528	0.00778	2.13	33.21	Used
	TRUE	High	DHALLEEQSKQQSNEHLRR	1xDeamidated [N/Q]	FALSE	0.0662236	0.00196464	1	5	2	XP_541640.2	2	2319.14	0	0.01	9.75497e-17		200		29111.7			High	Not Found	High	0.0005853	0.00836	2.01	15.18	Used
	TRUE	High	TFTAWCNSHLR	1xCarbamidomethyl [C6]	FALSE	0.0849103	0.00326873	3	13	1	XP_866874.1; XP_536333.2; XP_541640.2	0	1392.65	0	0.427	0.656438	0	140.1	59.9	936410	400041	Shared	High	Peak Found	High	0.001074	0.01322	2.02	33.34	Not Used
	TRUE	High	MAPYQGPDAVPGALDYK		FALSE	0.0865358	0.00364368	1	5	1	XP_541640.2	0	1792.86	0								No Quan Values	High	Not Found	High	0.00124	0.01367	2.06		Not Used
	TRUE	High	MAPYQGPDAVPGALDYK	1xOxidation [M1]	FALSE	0.103162	0.00429596	1	5	1	XP_541640.2	0	1808.85	0								No Quan Values	Not Found	High	High	0.001527	0.0187	1.5		Not Used
	TRUE	High	NVNVQNFHISWK		FALSE	0.119702	0.00590393	1	5	1	XP_541640.2	0	1485.76	0								No Quan Values	High	Not Found	High	0.002102	0.024	2.18		Not Used
	TRUE	High	LEDFRDYRR		FALSE	0.128847	0.00640612	3	15	1	XP_866874.1; XP_536333.2; XP_541640.2	2	1269.63	0	0.242	0.233226	0	161	39	1991915	482807	Shared	High	Peak Found	High	0.002348	0.02726	1.59	20.29	Not Used
	TRUE	High	KTFTAWCNSHLRK	1xCarbamidomethyl [C7]	FALSE	0.13284	0.00674258	3	12	1	XP_866874.1; XP_536333.2; XP_541640.2	2	1648.84	0	0.558	0.828457	0	128.4	71.6	582557	325149	Shared	High	Peak Found	High	0.002442	0.02868	2.08	20.82	Not Used
	TRUE	High	ALDFIASK		FALSE	0.167983	0.00885001	2	13	1	XP_866874.1; XP_541640.2	0	864.483	0	0.132	0.032429	0	176.8	23.2	1.40793e+06	185178	Shared	High	Peak Found	High	0.003198	0.04259	1.4	31.35	Not Used
TRUE	High	Master Protein	XP_536077.2	tubulin alpha-4A chain isoform X1 [Canis lupus familiaris]	0	FALSE	165.372	61	20	134	8	1	448	49.9	5.06	277.74	20	0	0.966	0.955956	9.58	100.7	99.3	3.97195e+07	3.91923e+07	High	High
	Checked	Confidence	Sequence	Modifications	Contaminant	Qvality PEP	Qvality q-value	# Protein Groups	# Proteins	# PSMs	Master Protein Accessions	# Missed Cleavages	Theo. MH+ [Da]	# Razor Quan Results	Abundance Ratio: (F4, Sample) / (F3, Control)	Abundance Ratio Adj. P-Value: (F4, Sample) / (F3, Control)	Abundance Ratio Variability [%]: (F4, Sample) / (F3, Control)	Abundances (Grouped): F3, Control	Abundances (Grouped): F4, Sample	Abundance: F3: Control	Abundance: F4: Sample	Quan Info	Found in Sample: [S3] F3: Control	Found in Sample: [S4] F4: Sample	Confidence (by Search Engine): Sequest HT	Percolator q-Value (by Search Engine): Sequest HT	Percolator PEP (by Search Engine): Sequest HT	XCorr (by Search Engine): Sequest HT	Top Apex RT [min]	Quan Usage
	TRUE	High	KLSDQCTGLQGFLVFHSFGGGTGSGFTSLLMER	1xCarbamidomethyl [C6]; 1xOxidation [M31]	FALSE	0.00142245	0	1	2	1	XP_536077.2	1	3550.71	0								No Quan Values	High	Not Found	High	0	0.000123	3.01		Not Used
	TRUE	High	TIGGGDDSFTTFFCETGAGK	1xCarbamidomethyl [C14]	FALSE	1.73013e-05	0	1	2	4	XP_536077.2	0	2067.9	0	0.974	0.99208	0	101.3	98.7	2.22492e+06	2.16666e+06		High	High	High	0	2.961e-06	3.86	69.6	Used
	TRUE	High	AVFVDLEPTVIDEIR		FALSE	5.27345e-06	0	1	2	13	XP_536077.2	0	1715.92	0	0.966	0.991149	0	101.7	98.3	1.53529e+07	1.48321e+07		High	High	High	0	1.062e-06	3.39	81.34	Used
	TRUE	High	DVNAAIAAIK		FALSE	0.00127771	0	1	4	4	XP_536077.2	0	985.568	0	0.899	0.9743	0	105.3	94.7	9.72779e+06	8.74727e+06		High	High	High	0	0.0001133	2.7	34.95	Used
	TRUE	High	KLSDQCTGLQGFLVFHSFGGGTGSGFTSLLMER	1xCarbamidomethyl [C6]; 1xDeamidated [Q5]; 1xOxidation [M31]	FALSE	0.00272569	0.000480221	1	2	2	XP_536077.2	1	3551.69	0								No Quan Values	High	Not Found	High	0.0001485	0.0005497	4.14		Not Used
	TRUE	High	LSDQCTGLQGFLVFHSFGGGTGSGFTSLLMER	1xCarbamidomethyl [C5]; 1xOxidation [M30]	FALSE	0.00475294	0.000480221	1	2	1	XP_536077.2	0	3422.61	0								No Quan Values	High	Not Found	High	0.0001485	0.0002885	3.21		Not Used
	TRUE	High	LSDQCTGLQGFLVFHSFGGGTGSGFTSLLMER	1xCarbamidomethyl [C5]; 1xDeamidated [Q9]; 1xOxidation [M30]	FALSE	0.00295394	0.000480221	1	2	1	XP_536077.2	0	3423.6	0								Not Reliable	High	Not Found	High	0.0001485	0.0002089	3.75		Not Used
	TRUE	High	EIIDPVLDR		FALSE	0.0285554	0.000865703	1	2	5	XP_536077.2	0	1069.59	0	1.238	0.953518	0	89.4	110.6	8.20658e+06	1.01617e+07		High	High	High	0.0002602	0.001913	1.73	37.07	Used
	TRUE	High	GHYTIGKEIIDPVLDR		FALSE	0.0401899	0.00101489	1	2	1	XP_536077.2	1	1825.98	0								No Quan Values	High	Not Found	High	0.000303	0.003371	2.83		Not Used
TRUE	High	Master Protein	XP_022265169.1	adenosine deaminase isoform X2 [Canis lupus familiaris]	0	FALSE	165.255	76	22	120	1	1	369	42	5.81	235.32	22	0	1.435	0.974301	29.34	74.3	125.7	2.84074e+07	4.80638e+07	High	High
	Checked	Confidence	Sequence	Modifications	Contaminant	Qvality PEP	Qvality q-value	# Protein Groups	# Proteins	# PSMs	Master Protein Accessions	# Missed Cleavages	Theo. MH+ [Da]	# Razor Quan Results	Abundance Ratio: (F4, Sample) / (F3, Control)	Abundance Ratio Adj. P-Value: (F4, Sample) / (F3, Control)	Abundance Ratio Variability [%]: (F4, Sample) / (F3, Control)	Abundances (Grouped): F3, Control	Abundances (Grouped): F4, Sample	Abundance: F3: Control	Abundance: F4: Sample	Quan Info	Found in Sample: [S3] F3: Control	Found in Sample: [S4] F4: Sample	Confidence (by Search Engine): Sequest HT	Percolator q-Value (by Search Engine): Sequest HT	Percolator PEP (by Search Engine): Sequest HT	XCorr (by Search Engine): Sequest HT	Top Apex RT [min]	Quan Usage
	TRUE	High	VEPIPWNQPEGDLTPDEVVALVSQSLQEGER	1xDeamidated [Q/N]	FALSE	0.000983595	0	2	5	8	XP_005635156.1; XP_022265169.1	0	3432.68	0	100	9.75497e-17			200		2091968	Shared	High	High	High	0	0.0001306	4.24	121.49	Not Used
	TRUE	High	VEPIPWNQPEGDLTPDEVVALVSQSLQEGER		FALSE	0.0011173	0	2	5	2	XP_005635156.1; XP_022265169.1	0	3431.7	0	1.4	0.909749	0	83.3	116.7	1.57542e+06	2204948	Shared	High	High	High	0	0.0001481	3.7	121.58	Not Used
	TRUE	High	LGHGYHTLEDEALYAR		FALSE	3.3634e-06	0	2	5	14	XP_005635156.1; XP_022265169.1	0	1844.89	0	0.926	0.978327	0	103.8	96.2	3.11908e+07	2.8893e+07	Shared	High	High	High	0	7.228e-07	3.61	34.43	Not Used
	TRUE	High	HQPNWSLEVVELCQK	1xCarbamidomethyl [C13]	FALSE	0.000376775	0	2	5	2	XP_005635156.1; XP_022265169.1	0	1866.92	0	1.259	0.947354	0	88.5	111.5	1.06547e+06	1.34173e+06	Shared	High	Peak Found	High	0	4.153e-05	2.69	58.17	Not Used
	TRUE	High	HQPNWSLEVVELCQK	1xCarbamidomethyl [C13]; 1xDeamidated [Q/N]	FALSE	4.67219e-05	0	2	5	3	XP_005635156.1; XP_022265169.1	0	1867.9	0								Not Reliable	High	High	High	0	6.965e-06	3.55		Not Used
	TRUE	High	STLETDYQMTK		FALSE	0.000777742	0	2	5	2	XP_005635156.1; XP_022265169.1	0	1316.6	0	4.275	0.247753	0	37.9	162.1	169679	725444	Shared	Peak Found	High	High	0	0.0001409	2.22	23.38	Not Used
	TRUE	High	FNYYMPAIAGSR	1xOxidation [M5]	FALSE	0.000854337	0	2	5	7	XP_005635156.1; XP_022265169.1	0	1405.66	0	0.601	0.852006	0	124.9	75.1	8.00085e+06	4.80646e+06	Shared	High	High	High	0	8.227e-05	3.67	37.84	Not Used
	TRUE	High	YQQTVVAIDLAGDETIK		FALSE	1.15682e-06	0	2	5	3	XP_005635156.1; XP_022265169.1	0	1863.97	0								No Quan Values	High	High	High	0	2.869e-07	4.93		Not Used
	TRUE	High	EGVVYVEVR		FALSE	0.00084295	0	2	5	5	XP_005635156.1; XP_022265169.1	0	1049.56	0	2.781	0.514381	0	52.9	147.1	5.51869e+06	1.53474e+07	Shared	High	High	High	0	8.111e-05	2.27	28.53	Not Used
	TRUE	High	AYGMPSLDAAGQHP		FALSE	0.00110241	0	1	1	4	XP_022265169.1	0	1414.64	0	0.01	9.75497e-17		200		301410			High	High	High	0	0.000101	2.69	37.23	Used
	TRUE	High	AYGMPSLDAAGQHP	1xOxidation [M4]	FALSE	8.78309e-06	0	1	1	9	XP_022265169.1	0	1430.64	0	1.746	0.831903	0	72.8	127.2	2.63165e+07	4.59549e+07		High	High	High	0	1.655e-06	3.48	25.07	Used
	TRUE	High	AYGMPSLDAAGQHP	1xDeamidated [Q12]; 1xOxidation [M4]	FALSE	0.000190007	0	1	1	6	XP_022265169.1	0	1431.62	0	1.178	0.971875	0	91.8	108.2	1.7895e+06	2.10891e+06		High	High	High	0.0001092	0.0001625	3.13	26.52	Used
	TRUE	High	YQQTVVAIDLAGDETIKGSSLFPGHVK	1xDeamidated [Q3]	FALSE	5.79168e-05	0	2	5	1	XP_005635156.1; XP_022265169.1	1	2874.49	0								No Quan Values	High	Not Found	High	0	8.423e-06	2.84		Not Used
	TRUE	High	YQQTVVAIDLAGDETIK	1xDeamidated [Q3]	FALSE	0.00110983	0	2	5	1	XP_005635156.1; XP_022265169.1	0	1864.95	0								Not Reliable	Not Found	High	High	0	0.0001011	2.11		Not Used
	TRUE	High	GIALPAETVEELQDIICMDKPLSLSSFLAK	1xCarbamidomethyl [C17]; 1xDeamidated [Q13]; 1xOxidation [M18]	FALSE	6.19525e-06	0	2	4	7	XP_005635156.1; XP_022265169.1	0	3305.69	0								No Quan Values	High	High	High	0	1.225e-06	2.64		Not Used
	TRUE	High	GIALPAETVEELQDIICMDKPLSLSSFLAK	1xCarbamidomethyl [C17]; 1xOxidation [M18]	FALSE	9.98002e-07	0	2	4	4	XP_005635156.1; XP_022265169.1	0	3304.71	0	1.17	0.971875	0	92.1	107.9	7.84301e+06	9.17949e+06	Shared	High	High	High	0	2.53e-07	4.14	124.94	Not Used
	TRUE	High	AKEGVVYVEVR		FALSE	0.00181085	0	2	5	4	XP_005635156.1; XP_022265169.1	1	1248.69	0	3.89	0.266859	0	40.9	159.1	578085	2.2486e+06	Shared	High	High	High	0.000528	0.008019	2.29	23.55	Not Used
	TRUE	High	NDQANYSLNTDDPLIFK		FALSE	0.00221429	0.000331607	2	5	2	XP_005635156.1; XP_022265169.1	0	1967.93	0								No Quan Values	High	High	High	0.0001092	0.0001709	2.7		Not Used
	TRUE	High	TVHAGEVGSAEVVK		FALSE	0.00224418	0.000331607	2	4	4	XP_005635156.1; XP_022265169.1	0	1382.73	0	2.372	0.653526	0	59.3	140.7	330801	784715	Shared	High	High	High	0.0001092	0.000173	2.7	15.39	Not Used
	TRUE	High	YQQTVVAIDLAGDETIKGSSLFPGHVK		FALSE	0.00785128	0.000480221	2	5	1	XP_005635156.1; XP_022265169.1	1	2873.5	0								No Quan Values	High	Not Found	High	0.0001485	0.0004238	2.26		Not Used
	TRUE	High	IAYEFVETK		FALSE	0.00739268	0.000480221	2	5	4	XP_005635156.1; XP_022265169.1	0	1099.57	0	1.665	0.852006	0	75	125	1.57991e+07	26309543	Shared	High	High	High	0.0001485	0.0004205	2.32	33.21	Not Used
	TRUE	High	GIALPAETVEELQDIICMDKPLSLSSFLAK	1xCarbamidomethyl [C17]; 1xDeamidated [Q13]	FALSE	0.0094671	0.000480221	2	4	2	XP_005635156.1; XP_022265169.1	0	3289.69	0								No Quan Values	High	High	High	0.0006407	0.008607	1.89		Not Used
	TRUE	High	SSFLPEDEKKQLLDLLYK	1xDeamidated [Q11]	FALSE	0.0054705	0.000480221	2	5	3	XP_005635156.1; XP_022265169.1	2	2167.15	0								No Quan Values	High	High	High	0.0001485	0.0003202	2.76		Not Used
	TRUE	High	YSPHLLANCK	1xCarbamidomethyl [C9]	FALSE	0.00965875	0.000480221	2	5	4	XP_005635156.1; XP_022265169.1	0	1202.6	0	7.056	0.0435003	0	24.8	175.2	187596	1.32367e+06	Shared	High	High	High	0.0007517	0.009547	2	20.23	Not Used
	TRUE	High	VEPIPWNQPEGDLTPDEVVALVSQSLQEGERDFK	2xDeamidated [Q8; Q24]	FALSE	0.00444507	0.000480221	2	5	1	XP_005635156.1; XP_022265169.1	1	3823.85	0								No Quan Values	Not Found	High	High	0.0001485	0.0002755	2.65		Not Used
	TRUE	High	VEPIPWNQPEGDLTPDEVVALVSQSLQEGERDFKVK	1xDeamidated [Q/N]	FALSE	0.0080641	0.000480221	2	5	4	XP_005635156.1; XP_022265169.1	2	4050.03	0	0.332	0.493993	0	150.2	49.8	589166	195581	Shared	High	High	High	0.0001485	0.0004638	2.82	124.96	Not Used
	TRUE	High	TVHAGEVGSAEVVKEAVDTLK		FALSE	0.0216262	0.000666919	2	4	2	XP_005635156.1; XP_022265169.1	1	2139.13	0	0.833	0.971293	0	109.1	90.9	1493175	1244002	Shared	High	High	High	0.004709	0.06092	2.48	53.6	Not Used
	TRUE	High	NDQANYSLNTDDPLIFK	1xDeamidated [N9]	FALSE	0.0415256	0.00101489	2	5	2	XP_005635156.1; XP_022265169.1	0	1968.92	0								No Quan Values	High	High	High	0.000303	0.003555	2.43		Not Used
	TRUE	High	FNYYMPAIAGSR		FALSE	0.0415256	0.00101489	2	5	2	XP_005635156.1; XP_022265169.1	0	1389.66	0								No Quan Values	High	High	High	0.0004148	0.006981	2.82		Not Used
	TRUE	High	SSFLPEDEKKQLLDLLYK		FALSE	0.0625014	0.00158702	2	5	1	XP_005635156.1; XP_022265169.1	2	2166.17	0	0.653	0.885998	0	121	79	3838445	2507770	Shared	High	Peak Found	High	0.0004718	0.007503	1.81	79.39	Not Used
	TRUE	High	TVHAGEVGSAEVVKEAVDTLKTER		FALSE	0.0637194	0.00177815	2	4	1	XP_005635156.1; XP_022265169.1	2	2525.32	0	0.225	0.189969	0	163.2	36.8	2.15941e+06	486582	Shared	High	Peak Found	High	0.000528	0.007809	2.41	58.18	Not Used
	TRUE	High	LRQENMHFEICPWSSYLTGAWK	1xCarbamidomethyl [C11]; 1xDeamidated [N5]; 1xOxidation [M6]	FALSE	0.073365	0.00234546	2	5	2	XP_005635156.1; XP_022265169.1	1	2770.28	0								No Quan Values	High	High	High	0.007606	0.09721	2.54		Not Used
	TRUE	High	VEPIPWNQPEGDLTPDEVVALVSQSLQEGERDFK		FALSE	0.0904418	0.00400093	2	5	1	XP_005635156.1; XP_022265169.1	1	3821.89	0	1.268	0.945696	0	88.2	111.8	1.96637e+06	2.49415e+06	Shared	High	Peak Found	High	0.001341	0.01476	2.14	126.72	Not Used
	TRUE	High	VEPIPWNQPEGDLTPDEVVALVSQSLQEGERDFKVK	2xDeamidated [Q8; Q24]	FALSE	0.153594	0.00734612	2	5	1	XP_005635156.1; XP_022265169.1	2	4051.02	0								No Quan Values	High	Not Found	High	0.002664	0.03654	2.66		Not Used
	TRUE	High	SILCCLR	2xCarbamidomethyl [C4; C5]	FALSE	0.160168	0.00801524	3	6	1	XP_005635156.1; XP_022265169.1; XP_005625578.1	0	921.464	0	100	9.75497e-17			200		4.4944e+06	Shared	Not Found	High	High	0.002959	0.03939	1.28	31.9	Not Used
TRUE	High	Master Protein	XP_003639703.1	LOW QUALITY PROTEIN: fermitin family homolog 3 [Canis lupus familiaris]	0	FALSE	165.229	58	24	108	24	1	663	75.3	6.95	215.01	24	0	0.831	0.919968	9.75	110.8	89.2	9.96921e+07	8.02826e+07	High	High
	Checked	Confidence	Sequence	Modifications	Contaminant	Qvality PEP	Qvality q-value	# Protein Groups	# Proteins	# PSMs	Master Protein Accessions	# Missed Cleavages	Theo. MH+ [Da]	# Razor Quan Results	Abundance Ratio: (F4, Sample) / (F3, Control)	Abundance Ratio Adj. P-Value: (F4, Sample) / (F3, Control)	Abundance Ratio Variability [%]: (F4, Sample) / (F3, Control)	Abundances (Grouped): F3, Control	Abundances (Grouped): F4, Sample	Abundance: F3: Control	Abundance: F4: Sample	Quan Info	Found in Sample: [S3] F3: Control	Found in Sample: [S4] F4: Sample	Confidence (by Search Engine): Sequest HT	Percolator q-Value (by Search Engine): Sequest HT	Percolator PEP (by Search Engine): Sequest HT	XCorr (by Search Engine): Sequest HT	Top Apex RT [min]	Quan Usage
	TRUE	High	ILEAHQNVAQLSLSEAQLR		FALSE	3.8209e-06	0	1	1	6	XP_003639703.1	0	2120.15	0	0.79	0.946021	0	111.7	88.3	6.45517e+06	5.09983e+06		High	High	High	0	5.335e-06	3.94	48.22	Used
	TRUE	High	ILEAHQNVAQLSLSEAQLR	1xDeamidated [Q/N]	FALSE	2.11609e-05	0	1	1	3	XP_003639703.1	0	2121.13	0								Not Reliable	Not Found	High	High	0	3.519e-06	1.84		Not Used
	TRUE	High	VFVGEDDPEAESVTLR		FALSE	5.49138e-07	0	1	1	11	XP_003639703.1	0	1762.85	0	0.91	0.977109	0	104.7	95.3	1.16577e+07	10607295		High	High	High	0	4.053e-07	3.77	40.63	Used
	TRUE	High	LPRPSSLLDKTQLHSR		FALSE	8.55041e-06	0	1	1	5	XP_003639703.1	1	1848.05	0	1.091	0.977963	0	95.7	104.3	8.86327e+06	9.66894e+06		High	High	High	0	1.615e-06	3.15	33.01	Used
	TRUE	High	KDEILGIANNR		FALSE	0.00169341	0	1	1	4	XP_003639703.1	1	1242.68	0	0.309	0.398848	0	152.7	47.3	1.48377e+06	459013		High	High	High	0.0001485	0.0002124	3.02	25.04	Used
	TRUE	High	TGGGGSGNHPQGPDASAEGLNPYGLVAPR	1xDeamidated [Q/N]	FALSE	0.000303956	0	1	1	2	XP_003639703.1	0	2734.28	0								Not Reliable	High	High	High	0	4.738e-05	3.84		Not Used
	TRUE	High	TGGGGSGNHPQGPDASAEGLNPYGLVAPR		FALSE	0.000124487	0	1	1	3	XP_003639703.1	0	2733.3	0	0.523	0.782648	0	131.4	68.6	4.6535e+06	2432047		High	Peak Found	High	0	1.62e-05	4.37	47.83	Used
	TRUE	High	TATGDYIDSSWELR		FALSE	0.000340692	0	1	1	2	XP_003639703.1	0	1613.74	0	0.831	0.97004	0	109.2	90.8	1.23666e+06	1.02804e+06		High	High	High	0	3.83e-05	2.31	50.76	Used
	TRUE	High	SQDEAPGDPIQQLNLK		FALSE	3.40807e-05	0	1	1	3	XP_003639703.1	0	1752.88	0	0.862	0.971875	0	107.4	92.6	2.59022e+06	2232697		High	High	High	0.0002019	0.001624	2.57	44.45	Used
	TRUE	High	LSQSGEVGETAGTDLGLDDLDAALNNLEVK		FALSE	0.00153136	0	1	1	3	XP_003639703.1	0	3044.49	0	0.213	0.188157	0	164.9	35.1	750195	159812		High	High	High	0	0.0001301	2.49	95.39	Used
	TRUE	High	TMADSSYASEVQAILAFLSLQR	1xDeamidated [Q]; 1xOxidation [M2]	FALSE	2.86295e-06	0	1	1	4	XP_003639703.1	0	2418.19	0								Not Reliable	High	High	High	0	6.28e-07	3.35		Not Used
	TRUE	High	TMADSSYASEVQAILAFLSLQR	1xOxidation [M2]	FALSE	4.93109e-06	0	1	1	4	XP_003639703.1	0	2417.2	0	0.537	0.800706	0	130.2	69.8	1.84005e+06	987232		High	High	High	0	1.365e-06	3.52	131.08	Used
	TRUE	High	VTGESHIGGVLLK		FALSE	0.000793555	0	1	1	6	XP_003639703.1	0	1309.75	0	0.701	0.902642	0	117.6	82.4	1.51316e+07	1.06018e+07		High	High	High	0	7.742e-05	2.59	29.18	Used
	TRUE	High	ASFSQPLFQAVAAICR	1xCarbamidomethyl [C15]	FALSE	2.8623e-05	0	1	1	5	XP_003639703.1	0	1765.91	0	0.831	0.969982	0	109.2	90.8	4346874	3.61121e+06		High	High	High	0	4.579e-06	4.3	85.7	Used
	TRUE	High	ARGEELDEDLFLQLTGGHEAF		FALSE	4.54841e-05	0	1	1	4	XP_003639703.1	1	2347.12	0	0.91	0.977109	0	104.7	95.3	867794	789440		High	High	High	0	6.804e-06	3.84	91.64	Used
	TRUE	High	ARGEELDEDLFLQLTGGHEAF	1xDeamidated [Q13]	FALSE	2.26351e-06	0	1	1	2	XP_003639703.1	1	2348.1	0								No Quan Values	High	High	High	0	5.132e-07	5.13		Not Used
	TRUE	High	FIQAWQSLPDFGISYIVVR	1xDeamidated [Q6]	FALSE	0.000463912	0	1	1	1	XP_003639703.1	0	2240.18	0								Not Reliable	High	Not Found	High	0	4.953e-05	2.47		Not Used
	TRUE	High	VVLAGGVAPALFR		FALSE	0.00108772	0	1	1	7	XP_003639703.1	0	1269.77	0	0.875	0.9743	0	106.7	93.3	1.16703e+07	1.02073e+07		High	High	High	0	9.957e-05	2.28	61.95	Used
	TRUE	High	GCEVVPDVNVSGQK	1xCarbamidomethyl [C2]	FALSE	0.000188736	0	1	1	4	XP_003639703.1	0	1487.72	0	0.561	0.822759	0	128.2	71.8	7.06291e+06	3.95989e+06		High	High	High	0.000303	0.002865	2.81	27.37	Used
	TRUE	High	GEELDEDLFLQLTGGHEAF		FALSE	0.000376775	0	1	1	2	XP_003639703.1	0	2119.98	0								No Quan Values	High	High	High	0	4.156e-05	3.49		Not Used
	TRUE	High	EKEPEEELYDLTK		FALSE	0.00267143	0.000331607	1	1	3	XP_003639703.1	1	1622.78	0	0.898	0.9743	0	105.4	94.6	3.87514e+06	3.47981e+06		High	High	High	0.0001485	0.0002232	3.31	41.34	Used
	TRUE	High	LTQLYEQAR		FALSE	0.00211278	0.000331607	1	1	2	XP_003639703.1	0	1121.59	0	0.577	0.831903	0	126.8	73.2	137264	79269.7		High	High	High	0.003149	0.04209	1.49	20.52	Used
	TRUE	High	LSQSGEVGETAGTDLGLDDLDAALNNLEVK	1xDeamidated [N/Q]	FALSE	0.00211278	0.000331607	1	1	5	XP_003639703.1	0	3045.47	0								Not Reliable	High	Not Found	High	0.0001092	0.0001753	4.22		Not Used
	TRUE	High	LEGSASTDVLNNLTTIPELKDHLR		FALSE	0.00686826	0.000480221	1	1	2	XP_003639703.1	1	2636.39	0	0.488	0.73767	0	134.4	65.6	3.12257e+06	1.52351e+06		High	Peak Found	High	0.0004148	0.007122	2.25	74.89	Used
	TRUE	High	GMPAHFSDSAQTEACYHMLSRPQPPPDPLLLQR	1xCarbamidomethyl [C15]; 2xOxidation [M2; M18]	FALSE	0.0050821	0.000480221	1	1	1	XP_003639703.1	0	3779.77	0								No Quan Values	High	Not Found	High	0.0001485	0.0003029	3.39		Not Used
	TRUE	High	LLSIRHPEELSLLR		FALSE	0.0238869	0.000666919	1	1	2	XP_003639703.1	1	1675.99	0	0.906	0.97587	0	104.9	95.1	1414807	1.2819e+06		High	High	High	0.0002019	0.001477	1.91	50.78	Used
	TRUE	High	LLVPSPEGMSEIYLR	1xOxidation [M9]	FALSE	0.0488763	0.00101489	1	1	1	XP_003639703.1	0	1719.9	0	0.908	0.977109	0	104.8	95.2	4.28068e+06	3.88683e+06		High	Peak Found	High	0.000303	0.004764	1.55	58.46	Used
	TRUE	High	FIQAWQSLPDFGISYIVVR		FALSE	0.0457963	0.00101489	1	1	1	XP_003639703.1	0	2239.19	0								No Quan Values	High	Not Found	High	0.000303	0.004218	2.04		Not Used
	TRUE	High	SQDEAPGDPIQQLNLK	1xDeamidated [Q/N]	FALSE	0.0791911	0.00309549	1	1	3	XP_003639703.1	0	1753.86	0								Not Reliable	Not Found	High	High	0.002471	0.0304	2.72		Not Used
	TRUE	High	LEGSASTDVLNNLTTIPELKDHLR	1xDeamidated [N]	FALSE	0.0865358	0.00364368	1	1	2	XP_003639703.1	1	2637.37	0								Not Reliable	High	Not Found	High	0.00124	0.01365	2.79		Not Used
	TRUE	High	IDLAVGDVVK		FALSE	0.116069	0.0051933	1	1	3	XP_003639703.1	0	1028.6	0	1.14	0.9743	0	93.5	106.5	4486645	5.11405e+06		High	High	High	0.002102	0.02389	2.45	40.66	Used
	TRUE	High	HPEELSLLR		FALSE	0.157321	0.00768559	1	1	2	XP_003639703.1	0	1093.6	0	0.816	0.959098	0	110.1	89.9	3.76493e+06	3.07274e+06		Peak Found	High	High	0.00276	0.03819	1.48	31.31	Used
TRUE	High	Master Protein	XP_022270129.1	coagulation factor XIII A chain [Canis lupus familiaris]	0	FALSE	164.565	46	25	89	25	1	733	83.3	6.2	203.06	25	0	0.26	0.0882147	1.95	156.4	43.6	1.08766e+08	3.03053e+07	High	High
	Checked	Confidence	Sequence	Modifications	Contaminant	Qvality PEP	Qvality q-value	# Protein Groups	# Proteins	# PSMs	Master Protein Accessions	# Missed Cleavages	Theo. MH+ [Da]	# Razor Quan Results	Abundance Ratio: (F4, Sample) / (F3, Control)	Abundance Ratio Adj. P-Value: (F4, Sample) / (F3, Control)	Abundance Ratio Variability [%]: (F4, Sample) / (F3, Control)	Abundances (Grouped): F3, Control	Abundances (Grouped): F4, Sample	Abundance: F3: Control	Abundance: F4: Sample	Quan Info	Found in Sample: [S3] F3: Control	Found in Sample: [S4] F4: Sample	Confidence (by Search Engine): Sequest HT	Percolator q-Value (by Search Engine): Sequest HT	Percolator PEP (by Search Engine): Sequest HT	XCorr (by Search Engine): Sequest HT	Top Apex RT [min]	Quan Usage
	TRUE	High	HVYGELNLQIQR		FALSE	0.000153282	0	1	1	4	XP_022270129.1	0	1469.79	0	0.381	0.567021	0	144.8	55.2	8819826	3.3639e+06		High	High	High	0	0.000137	2.91	38.03	Used
	TRUE	High	KDGTHVVETVDTTHIGK		FALSE	1.65145e-07	0	1	1	8	XP_022270129.1	1	1836.95	0	0.26	0.272987	0	158.7	41.3	8.1807e+06	2.12724e+06		High	High	High	0	5.342e-08	4.31	17.18	Used
	TRUE	High	VITNYFSAHDNDANLQMDIFLEEDGNVNSK	1xDeamidated [N]; 1xOxidation [M17]	FALSE	0.000644527	0	1	1	3	XP_022270129.1	0	3430.54	0								No Quan Values	High	Not Found	High	0	9.411e-05	4.64		Not Used
	TRUE	High	VITNYFSAHDNDANLQMDIFLEEDGNVNSK	1xOxidation [M17]	FALSE	2.65857e-05	0	1	1	3	XP_022270129.1	0	3429.55	0	0.01	9.75497e-17		200		1.91649e+06			High	High	High	0	4.287e-06	4.42	70.26	Used
	TRUE	High	LALETALMYGAK	1xOxidation [M8]	FALSE	0.000135838	0	1	1	3	XP_022270129.1	0	1296.69	0	0.461	0.706678	0	136.8	63.2	2475348	1.14228e+06		High	High	High	0	1.743e-05	2.52	48.97	Used
	TRUE	High	KLIASMTSDSLR		FALSE	0.000883483	0	1	1	3	XP_022270129.1	1	1321.71	0	0.176	0.0939208	0	170	30	2.26999e+06	400350		High	High	High	0	8.448e-05	2.9	27.03	Used
	TRUE	High	KLIASMTSDSLR	1xOxidation [M6]	FALSE	0.00117102	0	1	1	1	XP_022270129.1	1	1337.71	0	0.01	9.75497e-17		200		88418.4			High	Not Found	High	0	0.0001054	2.97	16.23	Used
	TRUE	High	KPLNIEGILKPR		FALSE	0.000130476	0	1	1	5	XP_022270129.1	0	1377.86	0	0.365	0.528269	0	146.5	53.5	1.49414e+07	5.45743e+06		High	High	High	0	8.53e-05	3.28	42.18	Used
	TRUE	High	SDVDMNFDVENAVLGR	1xOxidation [M5]	FALSE	0.000192575	0	1	1	2	XP_022270129.1	0	1796.81	0	0.01	9.75497e-17		200		3.80963e+06			High	Not Found	High	0	2.357e-05	2.52	54.24	Used
	TRUE	High	LTITFQNNSPR		FALSE	0.000224721	0	1	1	2	XP_022270129.1	0	1290.68	0	0.354	0.500455	0	147.8	52.2	6595392	2.33231e+06		High	High	High	0	2.686e-05	2.62	34.63	Used
	TRUE	High	NASNAAEDDLPTVELQGGPVPR		FALSE	4.70579e-07	0	1	1	4	XP_022270129.1	0	2250.1	0	0.072	0.00181827	0	186.5	13.5	9.93593e+06	717573		High	High	High	0	1.321e-07	4.39	51.5	Used
	TRUE	High	NASNAAEDDLPTVELQGGPVPR	1xDeamidated [Q/N]	FALSE	2.48654e-06	0	1	1	5	XP_022270129.1	0	2251.08	0								Not Reliable	High	High	High	0	1.408e-06	3.7		Not Used
	TRUE	High	FQEGQEEERLALETALMYGAK	1xDeamidated [Q]; 1xOxidation [M17]	FALSE	0.00168209	0	1	1	5	XP_022270129.1	1	2430.15	0								Not Reliable	High	High	High	0.0001485	0.0004175	3.62		Not Used
	TRUE	High	FQEGQEEERLALETALMYGAK	1xOxidation [M17]	FALSE	0.000303956	0	1	1	4	XP_022270129.1	1	2429.17	0	0.215	0.167473	0	164.7	35.3	3.58094e+06	768757		High	High	High	0	3.47e-05	2.96	74.13	Used
	TRUE	High	YGQCWVFAGVFNTFLR	1xCarbamidomethyl [C4]	FALSE	0.000195178	0	1	1	1	XP_022270129.1	0	1964.95	0	0.01	9.75497e-17		200		562762			High	Not Found	High	0	2.376e-05	2.33	114.27	Used
	TRUE	High	DGTHVVETVDTTHIGK		FALSE	1.40511e-05	0	1	1	10	XP_022270129.1	0	1708.85	0	0.21	0.158754	0	165.2	34.8	1.47901e+07	3.11145e+06		High	High	High	0.0001485	0.0002709	2.97	22.4	Used
	TRUE	High	AGEYMGQLLEQAYLHFFVTAR	1xOxidation [M5]	FALSE	0.00126069	0	1	1	2	XP_022270129.1	0	2460.2	0	0.294	0.362247	0	154.6	45.4	3078729	904857		High	Peak Found	High	0	0.0001118	2.88	103.26	Used
	TRUE	High	MYVAVWTPYGILR	1xOxidation [M1]	FALSE	0.00241591	0.000331607	1	1	3	XP_022270129.1	0	1584.82	0								No Quan Values	High	Not Found	High	0.0002602	0.002301	2.42		Not Used
	TRUE	High	LSIQSSPECIVGK	1xCarbamidomethyl [C9]	FALSE	0.00212699	0.000331607	1	1	3	XP_022270129.1	0	1417.74	0	0.537	0.800706	0	130.1	69.9	9200343	4.94055e+06		High	High	High	0.0001092	0.0001663	2.38	35.23	Used
	TRUE	High	SDVDMNFDVENAVLGR		FALSE	0.0101211	0.000480221	1	1	1	XP_022270129.1	0	1780.82	0								No Quan Values	High	Not Found	High	0.0001485	0.0005331	2.39		Not Used
	TRUE	High	NVWIHLDGPGVIKPMR	1xOxidation [M15]	FALSE	0.00714954	0.000480221	1	1	1	XP_022270129.1	0	1847.99	0	0.281	0.329299	0	156.1	43.9	1.66276e+06	467276		High	Peak Found	High	0.0001485	0.0003925	2.43	50.3	Used
	TRUE	High	STVLTIPQLIIK		FALSE	0.010748	0.000480221	1	1	2	XP_022270129.1	0	1325.84	0	0.244	0.236581	0	160.8	39.2	4417638	1.07814e+06		High	Peak Found	High	0.0001485	0.0005902	3.61	76.83	Used
	TRUE	High	GVNLQDYLHVTNIHLFK		FALSE	0.00481703	0.000480221	1	1	2	XP_022270129.1	0	2011.08	0	0.354	0.500455	0	147.7	52.3	4592874	1.62571e+06		High	Peak Found	High	0.0001485	0.0003673	2.75	79.08	Used
	TRUE	High	AGEYMGQLLEQAYLHFFVTAR	1xDeamidated [Q]; 1xOxidation [M5]	FALSE	0.00998678	0.000480221	1	1	2	XP_022270129.1	0	2461.19	0								Not Reliable	High	Not Found	High	0.0001485	0.0005272	2.35		Not Used
	TRUE	High	ETFEVTLEPLSFKR		FALSE	0.0155101	0.000480221	1	1	3	XP_022270129.1	1	1695.9	0	0.179	0.0989371	0	169.6	30.4	2.05784e+06	368598		High	High	High	0.0001485	0.0008365	2.59	64.87	Used
	TRUE	High	YPQENKGTYIPVPIVPELQR	1xDeamidated [N/Q]	FALSE	0.0168001	0.000666919	1	1	2	XP_022270129.1	1	2342.24	0								Not Reliable	High	Not Found	High	0.0002019	0.0009259	2.66		Not Used
	TRUE	High	VEYVIGRYPQENK		FALSE	0.0237292	0.000666919	1	1	1	XP_022270129.1	1	1594.82	0	0.23	0.201824	0	162.6	37.4	1.70313e+06	391953		Peak Found	High	High	0.0002019	0.00146	1.53	28.71	Used
	TRUE	High	MVGSDMVVTVEFTNPLK	2xOxidation [M1; M6]	FALSE	0.0212	0.000666919	1	1	1	XP_022270129.1	0	1898.92	0								No Quan Values	High	Not Found	High	0.0002019	0.001243	2.79		Not Used
	TRUE	High	GTYIPVPIVPELQR		FALSE	0.0409862	0.00101489	1	1	1	XP_022270129.1	0	1581.9	0	0.274	0.310031	0	157	43	3.80453e+06	1.04302e+06		High	Peak Found	High	0.000303	0.003474	2.76	72.31	Used
	TRUE	High	WDTNKVDHHTDKYENNK		FALSE	0.0633109	0.00158702	1	1	1	XP_022270129.1	2	2143.98	0	0.209	0.220142	0	165.4	34.6	146164	30610.7		High	Peak Found	High	0.000528	0.007703	2.69	12.62	Used
	TRUE	High	VDHHTDKYENNKLIVR		FALSE	0.0865358	0.00364368	1	1	1	XP_022270129.1	2	1981.03	0	0.247	0.312454	0	160.3	39.7	134785	33350.2		High	Peak Found	High	0.00124	0.01367	2.88	15.06	Used
TRUE	High	Master Protein	XP_013974803.1	adenylyl cyclase-associated protein 1 isoform X2 [Canis lupus familiaris]	0	FALSE	164.18	62	19	98	1	1	474	51.4	7.52	197.22	19	20	2.378	0.885001	101.82	91.6	108.4	3.89206e+07	4.60644e+07	High	Not Found
	Checked	Confidence	Sequence	Modifications	Contaminant	Qvality PEP	Qvality q-value	# Protein Groups	# Proteins	# PSMs	Master Protein Accessions	# Missed Cleavages	Theo. MH+ [Da]	# Razor Quan Results	Abundance Ratio: (F4, Sample) / (F3, Control)	Abundance Ratio Adj. P-Value: (F4, Sample) / (F3, Control)	Abundance Ratio Variability [%]: (F4, Sample) / (F3, Control)	Abundances (Grouped): F3, Control	Abundances (Grouped): F4, Sample	Abundance: F3: Control	Abundance: F4: Sample	Quan Info	Found in Sample: [S3] F3: Control	Found in Sample: [S4] F4: Sample	Confidence (by Search Engine): Sequest HT	Percolator q-Value (by Search Engine): Sequest HT	Percolator PEP (by Search Engine): Sequest HT	XCorr (by Search Engine): Sequest HT	Top Apex RT [min]	Quan Usage
	TRUE	High	LGLVFDDVVGIVEIINSR		FALSE	6.4067e-06	0	2	2	5	XP_005628950.1; XP_013974803.1	0	1958.1	0	0.448	0.686745	0	138.1	61.9	4.41178e+06	1.97792e+06	Shared	High	High	High	0	1.26e-06	3.63	132.7	Used
	TRUE	High	VENQENVSNLVIDDTELKQVAYIYK	1xDeamidated [N/Q]	FALSE	0.000752083	0	2	2	3	XP_005628950.1; XP_013974803.1	1	2925.47	0	100	9.75497e-17			200		800564	Shared	High	High	High	0	7.384e-05	4.08	79.01	Used
	TRUE	High	VENQENVSNLVIDDTELK	1xDeamidated [N/Q]	FALSE	8.15794e-06	0	2	2	5	XP_005628950.1; XP_013974803.1	0	2060	0								Not Reliable	High	High	High	0	3.205e-06	3.37		Not Used
	TRUE	High	VENQENVSNLVIDDTELK		FALSE	2.71327e-06	0	2	2	2	XP_005628950.1; XP_013974803.1	0	2059.02	0								No Quan Values	High	High	High	0	6.01e-07	2.58		Not Used
	TRUE	High	LEAVSHASDMHCGYGDSAPK	1xCarbamidomethyl [C12]	FALSE	0.000301923	0	2	2	5	XP_005628950.1; XP_013974803.1	0	2131.92	0	3.047	0.443173	0	49.4	150.6	419267	1.27761e+06	Shared	High	High	High	0	3.457e-05	2.45	17.56	Used
	TRUE	High	LEAVSHASDMHCGYGDSAPK	1xCarbamidomethyl [C12]; 1xOxidation [M10]	FALSE	1.82598e-06	0	2	2	6	XP_005628950.1; XP_013974803.1	0	2147.91	0	3.245	0.397109	0	47.1	152.9	456645	1.48175e+06	Shared	High	High	High	0	5.317e-05	4.06	14.01	Used
	TRUE	High	LSDLLAPISEQIQEVITYR		FALSE	2.15962e-06	0	2	2	5	XP_005628950.1; XP_013974803.1	0	2188.19	0	0.01	9.75497e-17		200		4.65594e+06		Shared	High	High	High	0	4.916e-07	3.72	110.05	Used
	TRUE	High	LSDLLAPISEQIQEVITYR	1xDeamidated [Q]	FALSE	9.84694e-07	0	2	2	9	XP_005628950.1; XP_013974803.1	0	2189.17	0								No Quan Values	High	High	High	0	1.057e-05	3.89		Not Used
	TRUE	High	TGPVAQELSGLPSGPSAGSGPPPPPPGPPPPPVPTSSGSDESASR	1xDeamidated [Q6]	FALSE	0.00080969	0	2	2	4	XP_005628950.1; XP_013974803.1	0	4155.02	0	0.646	0.880668	0	121.5	78.5	924098	597185	Shared	High	Peak Found	High	0	7.856e-05	4.34	72.93	Used
	TRUE	High	TGPVAQELSGLPSGPSAGSGPPPPPPGPPPPPVPTSSGSDESASR		FALSE	0.000293925	0	2	2	3	XP_005628950.1; XP_013974803.1	0	4154.03	0	0.01	9.75497e-17		200		44369		Shared	High	Not Found	High	0	3.369e-05	4.49	149.55	Used
	TRUE	High	SALFAQINQGESITHALK		FALSE	0.000509611	0	2	2	3	XP_005628950.1; XP_013974803.1	0	1928.02	0	0.745	0.924649	0	114.6	85.4	6.48411e+06	4.82956e+06	Shared	High	High	High	0.0001485	0.0004954	2.83	57.38	Used
	TRUE	High	EMNDAAMFYTNR	2xOxidation [M2; M7]	FALSE	0.000837313	0	2	2	2	XP_005628950.1; XP_013974803.1	0	1494.6	0	6.117	0.0737461	0	28.1	171.9	157238	961749	Shared	High	High	High	0	8.068e-05	2.57	24.01	Used
	TRUE	High	EMNDAAMFYTNR	1xOxidation [M]	FALSE	0.000451624	0	2	2	4	XP_005628950.1; XP_013974803.1	0	1478.6	0	1.694	0.847623	0	74.2	125.8	833376	1.41152e+06	Shared	High	High	High	0	0.0001046	3.53	29.37	Used
	TRUE	High	ALLVTASQCQQPAGNK	1xCarbamidomethyl [C9]	FALSE	2.92052e-05	0	2	2	4	XP_005628950.1; XP_013974803.1	0	1685.86	0	3.116	0.425211	0	48.6	151.4	1.61336e+06	5.02742e+06	Shared	High	High	High	0	9.733e-05	3.68	23.08	Used
	TRUE	High	ALLVTASQCQQPAGNK	1xCarbamidomethyl [C9]; 1xDeamidated [Q]	FALSE	1.01808e-05	0	2	2	4	XP_005628950.1; XP_013974803.1	0	1686.85	0	3.213	0.480238	0	47.5	152.5	161446	518689	Shared	High	High	High	0	1.558e-05	3.8	24.28	Used
	TRUE	High	SGPKPFSAPKPGVSPSPKPTAK		FALSE	0.0065103	0.000480221	2	2	11	XP_005628950.1; XP_013974803.1	0	2162.2	0	1.449	0.900109	0	81.7	118.3	1.12515e+07	1.63064e+07	Shared	High	High	High	0.000303	0.002784	3.3	18.82	Used
	TRUE	High	AVGRLEAVSHASDMHCGYGDSAPK	1xCarbamidomethyl [C16]; 1xOxidation [M14]	FALSE	0.00424149	0.000480221	2	2	3	XP_005628950.1; XP_013974803.1	1	2531.14	0	0.745	0.924649	0	114.6	85.4	1.21916e+06	908054	Shared	High	Peak Found	High	0.000303	0.005503	3.44	19.01	Used
	TRUE	High	GAAPYVQAFDSLLAGPVAEYLK		FALSE	0.00444507	0.000480221	1	1	1	XP_013974803.1	0	2280.19	0								No Quan Values	High	Not Found	High	0.0001485	0.0002755	2.97		Not Used
	TRUE	High	KEPAVLELEGKK		FALSE	0.0128698	0.000480221	2	2	4	XP_005628950.1; XP_013974803.1	2	1340.78	0	4.459	0.18774	0	36.6	163.4	963999	4.29866e+06	Shared	High	High	High	0.007518	0.09605	2.94	23.61	Used
	TRUE	High	LVTTVTEIAG		FALSE	0.0033326	0.000480221	2	2	4	XP_005628950.1; XP_013974803.1	0	1003.57	0	0.458	0.701353	0	137.2	62.8	2.65835e+06	1.21764e+06	Shared	High	High	High	0.0001485	0.0002263	2.75	35.98	Used
	TRUE	High	VENQENVSNLVIDDTELKQVAYIYK		FALSE	0.0116443	0.000480221	2	2	1	XP_005628950.1; XP_013974803.1	1	2924.49	0	0.25	0.250362	0	160	40	1.71208e+06	427873	Shared	High	Peak Found	High	0.0001485	0.0006131	2.64	79.11	Used
	TRUE	High	LFNHLSAVSESIQALGWVAMAPKPGPYVK	1xDeamidated [Q13]; 1xOxidation [M20]	FALSE	0.0250199	0.000666919	2	2	1	XP_005628950.1; XP_013974803.1	0	3127.63	0								No Quan Values	High	Not Found	High	0.0002019	0.001579	3.09		Not Used
	TRUE	High	KEPAVLELEGK		FALSE	0.0162502	0.000666919	2	2	2	XP_005628950.1; XP_013974803.1	1	1212.68	0	4.535	0.178924	0	36.1	163.9	666835	3.02406e+06	Shared	High	High	High	0.001395	0.01532	1.74	28.86	Used
	TRUE	High	GAAPYVQAFDSLLAGPVAEYLK	1xDeamidated [Q7]	FALSE	0.0325782	0.000865703	1	1	1	XP_013974803.1	0	2281.18	0								No Quan Values	High	Not Found	High	0.0002602	0.002362	3.03		Not Used
	TRUE	High	HAEMVHTGLKLER	1xOxidation [M4]	FALSE	0.0426252	0.00101489	2	2	3	XP_005628950.1; XP_013974803.1	1	1536.8	0	4.063	0.26457	0	39.5	160.5	186935	759586	Shared	High	High	High	0.002442	0.02846	2.43	15.35	Used
	TRUE	High	LFNHLSAVSESIQALGWVAMAPKPGPYVK	1xOxidation [M20]	FALSE	0.0426252	0.00101489	2	2	1	XP_005628950.1; XP_013974803.1	0	3126.64	0								No Quan Values	High	Not Found	High	0.000303	0.003733	4.55		Not Used
	TRUE	High	LSDLLAPISEQIQEVITYREK		FALSE	0.0933315	0.00414812	2	2	1	XP_005628950.1; XP_013974803.1	1	2445.32	0								No Quan Values	High	Not Found	High	0.001436	0.01557	2.67		Not Used
	TRUE	High	VPTISINK		FALSE	0.158265	0.00784511	2	3	1	XP_005628950.1; XP_013974803.1	0	871.525	0	2.378	0.737591	0	59.2	140.8	100149	238141	Shared	Peak Found	High	High	0.002806	0.03867	1.48	24.53	Used
TRUE	High	Master Protein	XP_005635156.1	adenosine deaminase isoform X3 [Canis lupus familiaris]	0	FALSE	163.254	83	23	109	2	1	363	41.1	5.69	210.34	23	18	1.222	0.96673	72.16	90.1	109.9	9.21147e+07	1.12449e+08	High	High
	Checked	Confidence	Sequence	Modifications	Contaminant	Qvality PEP	Qvality q-value	# Protein Groups	# Proteins	# PSMs	Master Protein Accessions	# Missed Cleavages	Theo. MH+ [Da]	# Razor Quan Results	Abundance Ratio: (F4, Sample) / (F3, Control)	Abundance Ratio Adj. P-Value: (F4, Sample) / (F3, Control)	Abundance Ratio Variability [%]: (F4, Sample) / (F3, Control)	Abundances (Grouped): F3, Control	Abundances (Grouped): F4, Sample	Abundance: F3: Control	Abundance: F4: Sample	Quan Info	Found in Sample: [S3] F3: Control	Found in Sample: [S4] F4: Sample	Confidence (by Search Engine): Sequest HT	Percolator q-Value (by Search Engine): Sequest HT	Percolator PEP (by Search Engine): Sequest HT	XCorr (by Search Engine): Sequest HT	Top Apex RT [min]	Quan Usage
	TRUE	High	VEPIPWNQPEGDLTPDEVVALVSQSLQEGER	1xDeamidated [Q/N]	FALSE	0.000983595	0	2	5	8	XP_005635156.1; XP_022265169.1	0	3432.68	0	100	9.75497e-17			200		2091968	Shared	High	High	High	0	0.0001306	4.24	121.49	Used
	TRUE	High	VEPIPWNQPEGDLTPDEVVALVSQSLQEGER		FALSE	0.0011173	0	2	5	2	XP_005635156.1; XP_022265169.1	0	3431.7	0	1.4	0.909749	0	83.3	116.7	1.57542e+06	2204948	Shared	High	High	High	0	0.0001481	3.7	121.58	Used
	TRUE	High	LGHGYHTLEDEALYAR		FALSE	3.3634e-06	0	2	5	14	XP_005635156.1; XP_022265169.1	0	1844.89	0	0.926	0.978327	0	103.8	96.2	3.11908e+07	2.8893e+07	Shared	High	High	High	0	7.228e-07	3.61	34.43	Used
	TRUE	High	VELHVHLDGAIKPETILYFSR		FALSE	0.000203198	0	1	1	3	XP_005635156.1	0	2437.32	0	0.316	0.415012	0	151.9	48.1	6.73946e+06	2.13172e+06		High	Peak Found	High	0	2.468e-05	2.61	73.15	Used
	TRUE	High	HQPNWSLEVVELCQK	1xCarbamidomethyl [C13]	FALSE	0.000376775	0	2	5	2	XP_005635156.1; XP_022265169.1	0	1866.92	0	1.259	0.947354	0	88.5	111.5	1.06547e+06	1.34173e+06	Shared	High	Peak Found	High	0	4.153e-05	2.69	58.17	Used
	TRUE	High	HQPNWSLEVVELCQK	1xCarbamidomethyl [C13]; 1xDeamidated [Q/N]	FALSE	4.67219e-05	0	2	5	3	XP_005635156.1; XP_022265169.1	0	1867.9	0								Not Reliable	High	High	High	0	6.965e-06	3.55		Not Used
	TRUE	High	STLETDYQMTK		FALSE	0.000777742	0	2	5	2	XP_005635156.1; XP_022265169.1	0	1316.6	0	4.275	0.247753	0	37.9	162.1	169679	725444	Shared	Peak Found	High	High	0	0.0001409	2.22	23.38	Used
	TRUE	High	FNYYMPAIAGSR	1xOxidation [M5]	FALSE	0.000854337	0	2	5	7	XP_005635156.1; XP_022265169.1	0	1405.66	0	0.601	0.852006	0	124.9	75.1	8.00085e+06	4.80646e+06	Shared	High	High	High	0	8.227e-05	3.67	37.84	Used
	TRUE	High	YQQTVVAIDLAGDETIK		FALSE	1.15682e-06	0	2	5	3	XP_005635156.1; XP_022265169.1	0	1863.97	0								No Quan Values	High	High	High	0	2.869e-07	4.93		Not Used
	TRUE	High	EGVVYVEVR		FALSE	0.00084295	0	2	5	5	XP_005635156.1; XP_022265169.1	0	1049.56	0	2.781	0.514381	0	52.9	147.1	5.51869e+06	1.53474e+07	Shared	High	High	High	0	8.111e-05	2.27	28.53	Used
	TRUE	High	AYGMPSLDAAAGQHP	1xOxidation [M4]	FALSE	9.51749e-05	0	1	4	5	XP_005635156.1	0	1501.67	0	1.185	0.971875	0	91.5	108.5	3.06913e+06	3.6375e+06		High	High	High	0	3.018e-05	3.74	26.87	Used
	TRUE	High	YQQTVVAIDLAGDETIKGSSLFPGHVK	1xDeamidated [Q3]	FALSE	5.79168e-05	0	2	5	1	XP_005635156.1; XP_022265169.1	1	2874.49	0								No Quan Values	High	Not Found	High	0	8.423e-06	2.84		Not Used
	TRUE	High	YQQTVVAIDLAGDETIK	1xDeamidated [Q3]	FALSE	0.00110983	0	2	5	1	XP_005635156.1; XP_022265169.1	0	1864.95	0								Not Reliable	Not Found	High	High	0	0.0001011	2.11		Not Used
	TRUE	High	GIALPAETVEELQDIICMDKPLSLSSFLAK	1xCarbamidomethyl [C17]; 1xDeamidated [Q13]; 1xOxidation [M18]	FALSE	6.19525e-06	0	2	4	7	XP_005635156.1; XP_022265169.1	0	3305.69	0								No Quan Values	High	High	High	0	1.225e-06	2.64		Not Used
	TRUE	High	GIALPAETVEELQDIICMDKPLSLSSFLAK	1xCarbamidomethyl [C17]; 1xOxidation [M18]	FALSE	9.98002e-07	0	2	4	4	XP_005635156.1; XP_022265169.1	0	3304.71	0	1.17	0.971875	0	92.1	107.9	7.84301e+06	9.17949e+06	Shared	High	High	High	0	2.53e-07	4.14	124.94	Used
	TRUE	High	AKEGVVYVEVR		FALSE	0.00181085	0	2	5	4	XP_005635156.1; XP_022265169.1	1	1248.69	0	3.89	0.266859	0	40.9	159.1	578085	2.2486e+06	Shared	High	High	High	0.000528	0.008019	2.29	23.55	Used
	TRUE	High	NDQANYSLNTDDPLIFK		FALSE	0.00221429	0.000331607	2	5	2	XP_005635156.1; XP_022265169.1	0	1967.93	0								No Quan Values	High	High	High	0.0001092	0.0001709	2.7		Not Used
	TRUE	High	TVHAGEVGSAEVVK		FALSE	0.00224418	0.000331607	2	4	4	XP_005635156.1; XP_022265169.1	0	1382.73	0	2.372	0.653526	0	59.3	140.7	330801	784715	Shared	High	High	High	0.0001092	0.000173	2.7	15.39	Used
	TRUE	High	YQQTVVAIDLAGDETIKGSSLFPGHVK		FALSE	0.00785128	0.000480221	2	5	1	XP_005635156.1; XP_022265169.1	1	2873.5	0								No Quan Values	High	Not Found	High	0.0001485	0.0004238	2.26		Not Used
	TRUE	High	IAYEFVETK		FALSE	0.00739268	0.000480221	2	5	4	XP_005635156.1; XP_022265169.1	0	1099.57	0	1.665	0.852006	0	75	125	1.57991e+07	26309543	Shared	High	High	High	0.0001485	0.0004205	2.32	33.21	Used
	TRUE	High	GIALPAETVEELQDIICMDKPLSLSSFLAK	1xCarbamidomethyl [C17]; 1xDeamidated [Q13]	FALSE	0.0094671	0.000480221	2	4	2	XP_005635156.1; XP_022265169.1	0	3289.69	0								No Quan Values	High	High	High	0.0006407	0.008607	1.89		Not Used
	TRUE	High	SSFLPEDEKKQLLDLLYK	1xDeamidated [Q11]	FALSE	0.0054705	0.000480221	2	5	3	XP_005635156.1; XP_022265169.1	2	2167.15	0								No Quan Values	High	High	High	0.0001485	0.0003202	2.76		Not Used
	TRUE	High	YSPHLLANCK	1xCarbamidomethyl [C9]	FALSE	0.00965875	0.000480221	2	5	4	XP_005635156.1; XP_022265169.1	0	1202.6	0	7.056	0.0435003	0	24.8	175.2	187596	1.32367e+06	Shared	High	High	High	0.0007517	0.009547	2	20.23	Used
	TRUE	High	VEPIPWNQPEGDLTPDEVVALVSQSLQEGERDFK	2xDeamidated [Q8; Q24]	FALSE	0.00444507	0.000480221	2	5	1	XP_005635156.1; XP_022265169.1	1	3823.85	0								No Quan Values	Not Found	High	High	0.0001485	0.0002755	2.65		Not Used
	TRUE	High	VEPIPWNQPEGDLTPDEVVALVSQSLQEGERDFKVK	1xDeamidated [Q/N]	FALSE	0.0080641	0.000480221	2	5	4	XP_005635156.1; XP_022265169.1	2	4050.03	0	0.332	0.493993	0	150.2	49.8	589166	195581	Shared	High	High	High	0.0001485	0.0004638	2.82	124.96	Used
	TRUE	High	TVHAGEVGSAEVVKEAVDTLK		FALSE	0.0216262	0.000666919	2	4	2	XP_005635156.1; XP_022265169.1	1	2139.13	0	0.833	0.971293	0	109.1	90.9	1493175	1244002	Shared	High	High	High	0.004709	0.06092	2.48	53.6	Used
	TRUE	High	NDQANYSLNTDDPLIFK	1xDeamidated [N9]	FALSE	0.0415256	0.00101489	2	5	2	XP_005635156.1; XP_022265169.1	0	1968.92	0								No Quan Values	High	High	High	0.000303	0.003555	2.43		Not Used
	TRUE	High	FNYYMPAIAGSR		FALSE	0.0415256	0.00101489	2	5	2	XP_005635156.1; XP_022265169.1	0	1389.66	0								No Quan Values	High	High	High	0.0004148	0.006981	2.82		Not Used
	TRUE	High	SSFLPEDEKKQLLDLLYK		FALSE	0.0625014	0.00158702	2	5	1	XP_005635156.1; XP_022265169.1	2	2166.17	0	0.653	0.885998	0	121	79	3838445	2507770	Shared	High	Peak Found	High	0.0004718	0.007503	1.81	79.39	Used
	TRUE	High	TVHAGEVGSAEVVKEAVDTLKTER		FALSE	0.0637194	0.00177815	2	4	1	XP_005635156.1; XP_022265169.1	2	2525.32	0	0.225	0.189969	0	163.2	36.8	2.15941e+06	486582	Shared	High	Peak Found	High	0.000528	0.007809	2.41	58.18	Used
	TRUE	High	LRQENMHFEICPWSSYLTGAWK	1xCarbamidomethyl [C11]; 1xDeamidated [N5]; 1xOxidation [M6]	FALSE	0.073365	0.00234546	2	5	2	XP_005635156.1; XP_022265169.1	1	2770.28	0								No Quan Values	High	High	High	0.007606	0.09721	2.54		Not Used
	TRUE	High	VEPIPWNQPEGDLTPDEVVALVSQSLQEGERDFK		FALSE	0.0904418	0.00400093	2	5	1	XP_005635156.1; XP_022265169.1	1	3821.89	0	1.268	0.945696	0	88.2	111.8	1.96637e+06	2.49415e+06	Shared	High	Peak Found	High	0.001341	0.01476	2.14	126.72	Used
	TRUE	High	VEPIPWNQPEGDLTPDEVVALVSQSLQEGERDFKVK	2xDeamidated [Q8; Q24]	FALSE	0.153594	0.00734612	2	5	1	XP_005635156.1; XP_022265169.1	2	4051.02	0								No Quan Values	High	Not Found	High	0.002664	0.03654	2.66		Not Used
	TRUE	High	SILCCLR	2xCarbamidomethyl [C4; C5]	FALSE	0.160168	0.00801524	3	6	1	XP_005635156.1; XP_022265169.1; XP_005625578.1	0	921.464	0	100	9.75497e-17			200		4.4944e+06	Shared	Not Found	High	High	0.002959	0.03939	1.28	31.9	Used
TRUE	High	Master Protein	XP_022270948.1	fibronectin isoform X3 [Canis lupus familiaris]	0	FALSE	162.998	25	31	91	31	1	2372	261.4	5.81	176.76	31	0	0.824	0.919968	25.77	110.6	89.4	3.33592e+07	2.69436e+07	High	High
	Checked	Confidence	Sequence	Modifications	Contaminant	Qvality PEP	Qvality q-value	# Protein Groups	# Proteins	# PSMs	Master Protein Accessions	# Missed Cleavages	Theo. MH+ [Da]	# Razor Quan Results	Abundance Ratio: (F4, Sample) / (F3, Control)	Abundance Ratio Adj. P-Value: (F4, Sample) / (F3, Control)	Abundance Ratio Variability [%]: (F4, Sample) / (F3, Control)	Abundances (Grouped): F3, Control	Abundances (Grouped): F4, Sample	Abundance: F3: Control	Abundance: F4: Sample	Quan Info	Found in Sample: [S3] F3: Control	Found in Sample: [S4] F4: Sample	Confidence (by Search Engine): Sequest HT	Percolator q-Value (by Search Engine): Sequest HT	Percolator PEP (by Search Engine): Sequest HT	XCorr (by Search Engine): Sequest HT	Top Apex RT [min]	Quan Usage
	TRUE	High	HRPRPYPPNVNEEIQVGHVPR		FALSE	2.20305e-05	0	1	7	1	XP_022270948.1	0	2491.31	0	0.595	0.850825	0	125.4	74.6	1.62391e+06	966454		High	Peak Found	High	0	3.654e-06	3.05	31.09	Used
	TRUE	High	HASLQTTSTGSGPFTDVR		FALSE	5.79304e-06	0	1	11	7	XP_022270948.1	0	1861.9	0	0.613	0.862055	0	124	76	3.25346e+06	1.99401e+06		High	High	High	0	1.153e-06	3.82	28.4	Used
	TRUE	High	HASLQTTSTGSGPFTDVR	1xDeamidated [Q5]	FALSE	0.000445603	0	1	11	3	XP_022270948.1	0	1862.89	0								No Quan Values	High	High	High	0	5.499e-05	2.36		Not Used
	TRUE	High	KVVTPLSPPTNLHLEANPDTGVLTVSWER	1xDeamidated [N17]	FALSE	0.000496113	0	1	11	1	XP_022270948.1	1	3171.67	0								No Quan Values	High	Not Found	High	0	5.24e-05	2.67		Not Used
	TRUE	High	TEIDKPSQMQVTDVQDNSISVR	1xDeamidated [Q/N]; 1xOxidation [M9]	FALSE	9.0199e-05	0	1	11	11	XP_022270948.1	0	2507.19	0								No Quan Values	High	High	High	0	1.434e-05	4.76		Not Used
	TRUE	High	TEIDKPSQMQVTDVQDNSISVR	1xOxidation [M9]	FALSE	5.45344e-06	0	1	11	5	XP_022270948.1	0	2506.21	0	1.034	0.991247	0	98.3	101.7	4.10537e+06	4.24368e+06		High	High	High	0	1.095e-06	4.4	30.38	Used
	TRUE	High	RPGAEPGHEGSTGHYNQYSQR		FALSE	0.00042231	0	1	11	2	XP_022270948.1	0	2328.05	0	0.314	0.45749	0	152.2	47.8	177976	55934.1		High	Peak Found	High	0	4.59e-05	3.26	12.42	Used
	TRUE	High	SSPVVIDASTAIDAPSNLR		FALSE	8.43434e-05	0	1	11	4	XP_022270948.1	0	1913	0	0.979	0.993516	0	101.1	98.9	1524941	1.49244e+06		High	High	High	0	1.159e-05	3.67	51.67	Used
	TRUE	High	NTFAEVTGLSPGVTYHFK		FALSE	0.00024686	0	1	11	3	XP_022270948.1	0	1967.99	0	0.544	0.808031	0	129.5	70.5	1.81036e+06	984661		High	High	High	0.000303	0.004792	2.67	59.52	Used
	TRUE	High	EVTSDSGSIVVSGLTPGVEYVYTISVLR		FALSE	0.00181085	0	1	11	1	XP_022270948.1	0	2927.52	0								No Quan Values	High	Not Found	High	0	0.0001478	3.03		Not Used
	TRUE	High	FLATTPNSLLVSWQPPR	1xDeamidated [N/Q]	FALSE	0.000951149	0	1	11	3	XP_022270948.1	0	1928.03	0								Not Reliable	High	Not Found	High	0.000303	0.004663	2.58		Not Used
	TRUE	High	VPGTSASATLTGLTR		FALSE	0.000392257	0	1	10	3	XP_022270948.1	0	1431.78	0	1.034	0.991247	0	98.3	101.7	4.30187e+06	4.44823e+06		High	High	High	0	0.0001236	2.35	35.31	Used
	TRUE	High	IYLYTLNDNAR		FALSE	0.00196257	0.000331607	1	11	2	XP_022270948.1	0	1355.7	0	1.05	0.988634	0	97.6	102.4	1256611	1.3194e+06		High	High	High	0.0001092	0.0001568	2.36	41.94	Used
	TRUE	High	QYNVGPSASQYPLR		FALSE	0.00186008	0.000331607	1	11	2	XP_022270948.1	0	1579.79	0	0.896	0.9743	0	105.5	94.5	3.21658e+06	2.88285e+06		High	High	High	0.001436	0.01753	2.4	32.57	Used
	TRUE	High	TAGPDQTEMTIEGLQPTVEYVVSVYAQNR	1xDeamidated [Q/N]; 1xOxidation [M9]	FALSE	0.00233628	0.000331607	1	11	3	XP_022270948.1	0	3213.53	0								No Quan Values	High	High	High	0.0001092	0.0001947	4.22		Not Used
	TRUE	High	YSFCTDHTVLVQTR	1xCarbamidomethyl [C4]	FALSE	0.00710187	0.000480221	1	11	1	XP_022270948.1	0	1726.82	0								No Quan Values	High	Not Found	High	0.0001485	0.0003905	2.67		Not Used
	TRUE	High	TEIDKPSQMQVTDVQDNSISVR	1xDeamidated [N/Q]	FALSE	0.0029938	0.000480221	1	11	4	XP_022270948.1	0	2491.2	0	0.01	9.75497e-17		200		366696			High	Not Found	High	0.0001485	0.000211	3.92	37.26	Used
	TRUE	High	TAGPDQTEMTIEGLQPTVEYVVSVYAQNR	1xOxidation [M9]	FALSE	0.0145105	0.000480221	1	11	1	XP_022270948.1	0	3212.54	0								No Quan Values	High	Not Found	High	0.0001485	0.0007744	3.39		Not Used
	TRUE	High	NTFAEVTGLSPGVTYHFK	1xDeamidated [N1]	FALSE	0.00959444	0.000480221	1	11	1	XP_022270948.1	0	1968.97	0								No Quan Values	Not Found	High	High	0.0001485	0.0005073	1.88		Not Used
	TRUE	High	FTQVTPTSLTAQWTAPNVQLTGYR		FALSE	0.00515061	0.000480221	1	11	1	XP_022270948.1	0	2680.37	0								No Quan Values	High	Not Found	High	0.0001485	0.0003058	2.99		Not Used
	TRUE	High	GDSPASSKPVSIDYR		FALSE	0.00764406	0.000480221	1	11	2	XP_022270948.1	0	1578.78	0	0.245	0.269598	0	160.7	39.3	705869	172879		High	High	High	0.0005853	0.008349	2.5	20.62	Used
	TRUE	High	EATIPGHLNSYTIK		FALSE	0.01082	0.000480221	1	11	1	XP_022270948.1	0	1543.81	0	0.887	0.9743	0	106	94	990887	878536		High	Peak Found	High	0.0001485	0.0005705	1.99	34.01	Used
	TRUE	High	ITYGETGGNSPVQEFTVPGSK	1xDeamidated [N/Q]	FALSE	0.0119592	0.000480221	1	11	2	XP_022270948.1	0	2169.03	0								Not Reliable	High	Not Found	High	0.001527	0.01967	2.58		Not Used
	TRUE	High	SYTITGLQPGTDYK		FALSE	0.00361159	0.000480221	1	11	3	XP_022270948.1	0	1543.76	0	1.12	0.9743	0	94.3	105.7	1.22461e+06	1.37158e+06		High	High	High	0.0002602	0.002509	2.31	38.05	Used
	TRUE	High	ESRPLTAEQTTKLDAPTNLR		FALSE	0.0128698	0.000480221	1	11	3	XP_022270948.1	1	2241.18	0	0.824	0.965038	0	109.7	90.3	5.91904e+06	4.87648e+06		High	High	High	0.0001485	0.0006785	3.16	29.56	Used
	TRUE	High	ESRPLTAEQTTKLDAPTNLR	1xDeamidated [N/Q]	FALSE	0.00410179	0.000480221	1	11	2	XP_022270948.1	1	2242.17	0								Not Reliable	High	Not Found	High	0.0001485	0.0002611	2.05		Not Used
	TRUE	High	VVTPLSPPTNLHLEANPDTGVLTVSWER	1xDeamidated [N]	FALSE	0.0188112	0.000666919	1	11	2	XP_022270948.1	0	3043.57	0								Not Reliable	High	Not Found	High	0.0002019	0.001064	3.45		Not Used
	TRUE	High	NSITLTNLNPGTEYVVSIIALNGREESPPLIGQQSTVSDVPR	3xDeamidated [N9; N22; Q33]	FALSE	0.0162502	0.000666919	1	11	1	XP_022270948.1	1	4482.29	0								No Quan Values	High	Not Found	High	0.0002019	0.0008839	2.95		Not Used
	TRUE	High	TKTETITGFQVDAIPANGQNPIQR		FALSE	0.0237292	0.000666919	1	11	1	XP_022270948.1	1	2599.35	0								No Quan Values	High	Not Found	High	0.0002019	0.001451	2.81		Not Used
	TRUE	High	WSRPQAPITGYR		FALSE	0.024528	0.000666919	1	11	1	XP_022270948.1	0	1431.75	0	0.576	0.835662	0	126.9	73.1	1.68029e+06	968123		High	Peak Found	High	0.0002019	0.001523	2.31	29.93	Used
	TRUE	High	ITYGETGGNSPVQEFTVPGSK		FALSE	0.0279955	0.000865703	1	11	1	XP_022270948.1	0	2168.05	0								No Quan Values	High	Not Found	High	0.0002602	0.001856	2.1		Not Used
	TRUE	High	RPGAEPGHEGSTGHYNQYSQR	1xDeamidated [Q/N]	FALSE	0.0359531	0.00101489	1	11	2	XP_022270948.1	0	2329.03	0								Not Reliable	High	Not Found	High	0.002959	0.03934	2.89		Not Used
	TRUE	High	TGLDSPSGIDFSDITANSFTVHWIAPR	1xDeamidated [N17]	FALSE	0.0341129	0.00101489	1	11	1	XP_022270948.1	0	2905.4	0								Not Reliable	High	Not Found	High	0.000303	0.002549	2.64		Not Used
	TRUE	High	RPHETGGYMLECVCLGNGK	2xCarbamidomethyl [C12; C14]; 1xDeamidated [N17]; 1xOxidation [M9]	FALSE	0.0752607	0.002533	1	11	1	XP_022270948.1	0	2194.97	0								No Quan Values	Not Found	High	High	0.0008633	0.01057	2.25		Not Used
	TRUE	High	FLATTPNSLLVSWQPPR		FALSE	0.0743072	0.002533	1	11	3	XP_022270948.1	0	1927.04	0								No Quan Values	High	High	High	0.0008633	0.01028	2.11		Not Used
	TRUE	High	NLQPATEYTVSLVAVK		FALSE	0.0843749	0.00326873	1	11	1	XP_022270948.1	0	1732.95	0	0.01	9.75497e-17		200		731821			High	Not Found	High	0.001074	0.01308	1.8	56.34	Used
	TRUE	High	NGESQPLVQTAVTTIPAPADLK	1xDeamidated [Q9]	FALSE	0.0981334	0.00414812	1	5	1	XP_022270948.1	0	2251.18	0								Not Reliable	High	Not Found	High	0.001436	0.01707	2.21		Not Used
	TRUE	High	VTWAPPPSIELTNFLVR		FALSE	0.106425	0.00429596	1	11	1	XP_022270948.1	0	1940.06	0								No Quan Values	High	Not Found	High	0.001527	0.01972	2.22		Not Used
	TRUE	High	GFNCESKPEPEETCFDKYTGNTYR	2xCarbamidomethyl [C4; C14]; 1xDeamidated [N3]	FALSE	0.110465	0.00447225	1	11	1	XP_022270948.1	1	2930.22	0								No Quan Values	Not Found	High	High	0.001579	0.02099	2.09		Not Used
	TRUE	High	ITGYIIKYEKPGSPPR		FALSE	0.116788	0.00537309	1	11	1	XP_022270948.1	1	1819.01	0	0.615	0.873324	0	123.8	76.2	468862	288341		High	Peak Found	High	0.001947	0.02317	3.02	32.32	Used
	TRUE	High	TKTETITGFQVDAIPANGQNPIQR	1xDeamidated [N17]	FALSE	0.178218	0.00984038	1	11	1	XP_022270948.1	1	2600.33	0								Not Reliable	High	Not Found	High	0.003635	0.04671	3.22		Not Used
TRUE	High	Master Protein	XP_013964909.2	pyruvate kinase PKM isoform X1 [Canis lupus familiaris]	0	FALSE	155.663	53	22	114	2	1	591	64.3	7.87	257.65	22	17	0.816	0.919968	18.03	111.5	88.5	9.40012e+07	7.45848e+07	High	High
	Checked	Confidence	Sequence	Modifications	Contaminant	Qvality PEP	Qvality q-value	# Protein Groups	# Proteins	# PSMs	Master Protein Accessions	# Missed Cleavages	Theo. MH+ [Da]	# Razor Quan Results	Abundance Ratio: (F4, Sample) / (F3, Control)	Abundance Ratio Adj. P-Value: (F4, Sample) / (F3, Control)	Abundance Ratio Variability [%]: (F4, Sample) / (F3, Control)	Abundances (Grouped): F3, Control	Abundances (Grouped): F4, Sample	Abundance: F3: Control	Abundance: F4: Sample	Quan Info	Found in Sample: [S3] F3: Control	Found in Sample: [S4] F4: Sample	Confidence (by Search Engine): Sequest HT	Percolator q-Value (by Search Engine): Sequest HT	Percolator PEP (by Search Engine): Sequest HT	XCorr (by Search Engine): Sequest HT	Top Apex RT [min]	Quan Usage
	TRUE	High	LDIDSPPITAR		FALSE	0.000176484	0	2	3	6	XP_013964909.2; XP_022268508.1	0	1197.65	0	0.927	0.978429	0	103.8	96.2	1.12544e+07	1.04347e+07	Shared	High	High	High	0	2.186e-05	2.92	34.4	Used
	TRUE	High	LNFSHGTHEYHAETIK		FALSE	0.000284225	0	2	3	14	XP_013964909.2; XP_022268508.1	0	1883.9	0	0.82	0.960264	0	109.9	90.1	2.35411e+07	1.9293e+07	Shared	High	High	High	0.000303	0.005103	3.1	19.73	Used
	TRUE	High	LNFSHGTHEYHAETIK	1xDeamidated [N2]	FALSE	0.000276697	0	2	3	4	XP_013964909.2; XP_022268508.1	0	1884.89	0	0.643	0.885998	0	121.7	78.3	516487	332033	Shared	High	High	High	0	3.199e-05	2.5	23.68	Used
	TRUE	High	LAPITSDPTEAAAVGAVEASFK		FALSE	9.1501e-09	0	1	2	14	XP_013964909.2	0	2145.11	0	0.666	0.893446	0	120	80	1.36283e+07	9.07807e+06		High	High	High	0	4.402e-09	4.11	78.06	Used
	TRUE	High	KGVNLPGAAVDLPAVSEKDIQDLK		FALSE	0.000854337	0	2	4	3	XP_013964909.2; XP_022268508.1	2	2477.36	0	0.857	0.971875	0	107.7	92.3	2.59646e+06	2.22605e+06	Shared	High	High	High	0	8.226e-05	3.62	64.61	Used
	TRUE	High	KGVNLPGAAVDLPAVSEKDIQDLK	1xDeamidated [Q/N]	FALSE	0.000105256	0	2	4	4	XP_013964909.2; XP_022268508.1	2	2478.34	0								Not Reliable	High	High	High	0	0.0001342	4.1		Not Used
	TRUE	High	RFDEILEASDGIMVAR	1xOxidation [M13]	FALSE	0.000144297	0	2	4	2	XP_013964909.2; XP_022268508.1	1	1837.91	0	0.88	0.9743	0	106.4	93.6	1567895	1379230	Shared	High	Peak Found	High	0	1.845e-05	3.31	52.24	Used
	TRUE	High	NTGIICTIGPASR	1xCarbamidomethyl [C6]	FALSE	0.000215851	0	2	3	6	XP_013964909.2; XP_022268508.1	0	1359.7	0	0.675	0.89828	0	119.4	80.6	1.42564e+07	9.62589e+06	Shared	High	High	High	0	2.598e-05	3.45	32.26	Used
	TRUE	High	IYVDDGLISLQVK		FALSE	2.80524e-05	0	2	4	8	XP_013964909.2; XP_022268508.1	0	1462.82	0	0.629	0.876904	0	122.8	77.2	3306950	2.08071e+06	Shared	High	High	High	0	4.506e-06	3.41	65.05	Used
	TRUE	High	FGVEQDVDMVFASFIR	1xOxidation [M9]	FALSE	1.66221e-06	0	2	4	6	XP_013964909.2; XP_022268508.1	0	1875.89	0	0.598	0.852006	0	125.2	74.8	2.32839e+06	1.39131e+06	Shared	High	High	High	0	3.918e-07	4.24	105.66	Used
	TRUE	High	FGVEQDVDMVFASFIR	1xDeamidated [Q5]; 1xOxidation [M9]	FALSE	6.0703e-05	0	2	4	1	XP_013964909.2; XP_022268508.1	0	1876.88	0								Not Reliable	Not Found	High	High	0	8.727e-06	2.31		Not Used
	TRUE	High	AEGSDVANAVLDGADCIMLSGETAK	1xCarbamidomethyl [C16]; 1xDeamidated [N8]; 1xOxidation [M18]	FALSE	0.00152112	0	2	4	2	XP_013964909.2; XP_022268508.1	0	2511.12	0								No Quan Values	High	High	High	0.0001485	0.0002142	3.63		Not Used
	TRUE	High	AEGSDVANAVLDGADCIMLSGETAKGDYPLEAVR	1xCarbamidomethyl [C16]; 1xDeamidated [N8]; 1xOxidation [M18]	FALSE	0.00182304	0	2	4	4	XP_013964909.2; XP_022268508.1	1	3511.62	0								No Quan Values	High	High	High	0.0001485	0.0002601	2.86		Not Used
	TRUE	High	AEGSDVANAVLDGADCIMLSGETAKGDYPLEAVR	1xCarbamidomethyl [C16]; 1xOxidation [M18]	FALSE	0.00128631	0	2	4	3	XP_013964909.2; XP_022268508.1	1	3510.64	0	0.938	0.985609	0	103.2	96.8	2663878	2.49967e+06	Shared	High	High	High	0.0004148	0.006577	3.58	76.9	Used
	TRUE	High	GIFPVVCKDPVQEAWAEDVDLR	1xCarbamidomethyl [C7]	FALSE	0.0013848	0	2	4	1	XP_013964909.2; XP_022268508.1	1	2543.26	0								No Quan Values	High	Not Found	High	0	0.0001207	2.77		Not Used
	TRUE	High	AGKPVICATQMLESMIK	1xCarbamidomethyl [C7]; 2xOxidation [M11; M15]	FALSE	0.00024194	0	2	4	5	XP_013964909.2; XP_022268508.1	0	1908.96	0	1.299	0.936187	0	87	113	2.18223e+06	2.83384e+06	Shared	High	High	High	0.0004718	0.007538	2.1	41.8	Used
	TRUE	High	AATESFASDPILYRPVAVALDTKGPEIR		FALSE	0.000312227	0	2	4	3	XP_013964909.2; XP_022268508.1	1	2987.58	0	0.659	0.888223	0	120.6	79.4	5.52333e+06	3.63833e+06	Shared	High	High	High	0	3.554e-05	3.39	75.23	Used
	TRUE	High	GADFLVTEVENGGSLGSK	1xDeamidated [N11]	FALSE	0.000614952	0	2	4	2	XP_013964909.2; XP_022268508.1	0	1780.86	0								No Quan Values	High	Not Found	High	0.0001485	0.0004332	2.57		Not Used
	TRUE	High	GADFLVTEVENGGSLGSK		FALSE	2.40393e-05	0	2	4	5	XP_013964909.2; XP_022268508.1	0	1779.88	0								No Quan Values	High	High	High	0	6.083e-06	2.69		Not Used
	TRUE	High	CCSGAIIVLTK	2xCarbamidomethyl [C1; C2]	FALSE	0.00744229	0.000480221	1	2	1	XP_013964909.2	0	1221.63	0								No Quan Values	High	Not Found	High	0.0001485	0.0004046	2.2		Not Used
[truncated: 4,217 more rows]

## Sheet: D1S Search Summary
Result name: Signe10390340_Concentrate_Samples
Result file: D:\PD2.2 results after 20171126\Precursor IOn Quan LFQ gelFrac\Signe10390340_Concentrate_Samples.msf
[truncated: 127 more rows]

## Sheet: D1 Pellet (D1P)
Checked	Protein FDR Confidence: Combined	Master	Accession	Description	Exp. q-value: Combined	Contaminant	Sum PEP Score	Coverage [%]	# Peptides	# PSMs	# Unique Peptides	# Protein Groups	# AAs	MW [kDa]	calc. pI	Score Sequest HT: Sequest HT	# Peptides (by Search Engine): Sequest HT	# Razor Peptides	Abundance Ratio: (F2, Sample) / (F1, Control)	Abundance Ratio Variability [%]: (F2, Sample) / (F1, Control)	Abundances (Grouped): F1, Control	Abundances (Grouped): F2, Sample	Abundance: F1: Control	Abundance: F2: Sample	Found in Sample: [S1] F1: Control	Found in Sample: [S2] F2: Sample
[truncated: 3,712 more rows]

[truncated: 5 more sheets: D1P Search Summary, D1 Soluble Rerun (D1SR), D1SR Search Summary, D1 Pellet Rerun (D1PR), D1PR Search Summary]
